# Supplementary material
Source: MDPI journal article supplement (https://www.mdpi.com/2306-5729/4/1/37)

PILE A1  
right side

$t, ^\circ\text{C}$

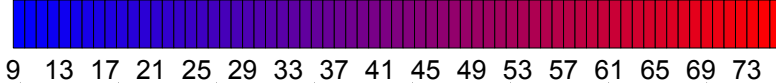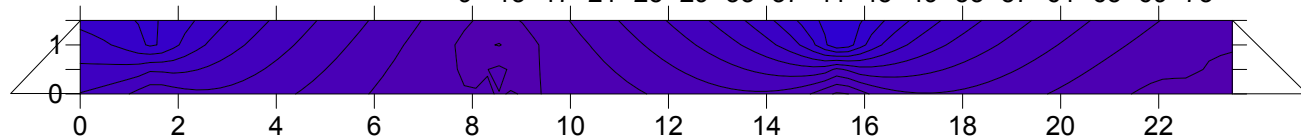

PILE A1  
left side

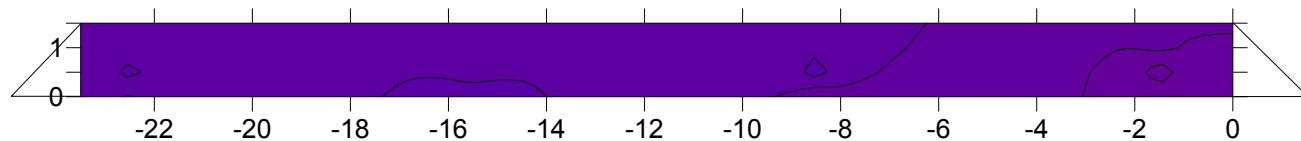

PILE A1  
length 1,5 m

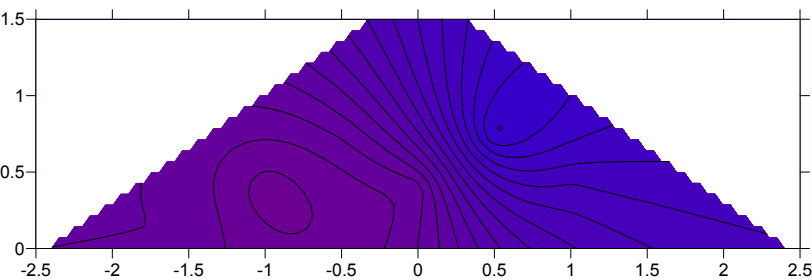

PILE A1  
length 8,5 m

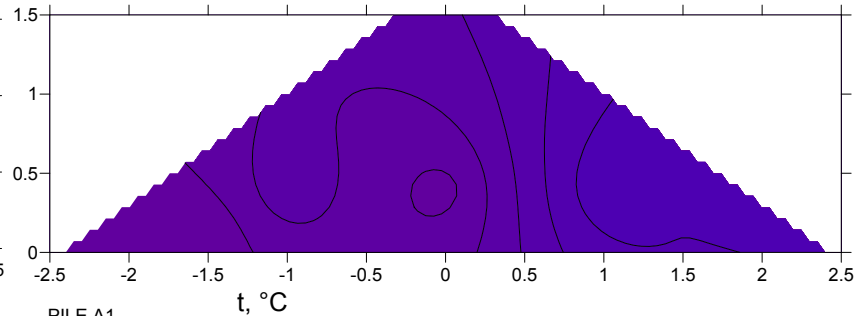

PILE A1  
length 15,5 m

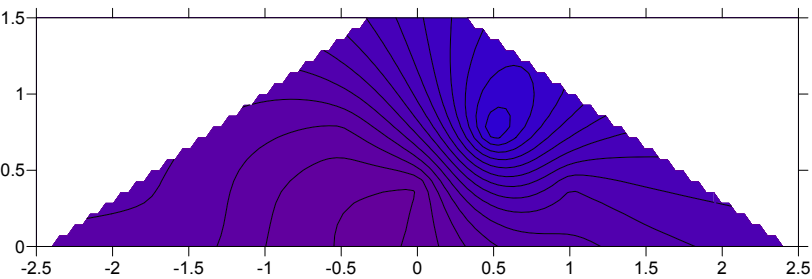

PILE A1  
length 22,5 m

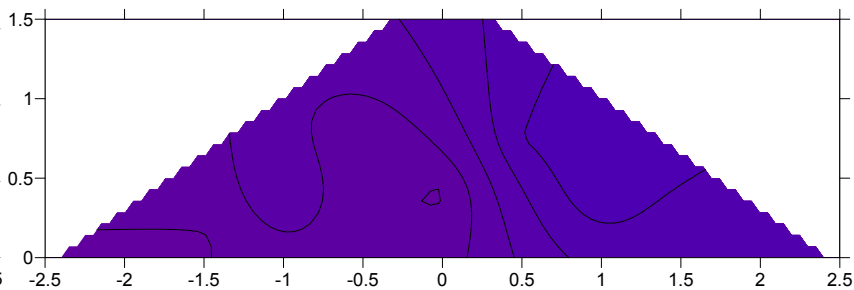

Supplement: s1 [file s1]
