# Supplementary material (part 1 of 3)
Source: MDPI journal article supplement (https://www.mdpi.com/2306-5729/4/1/37)

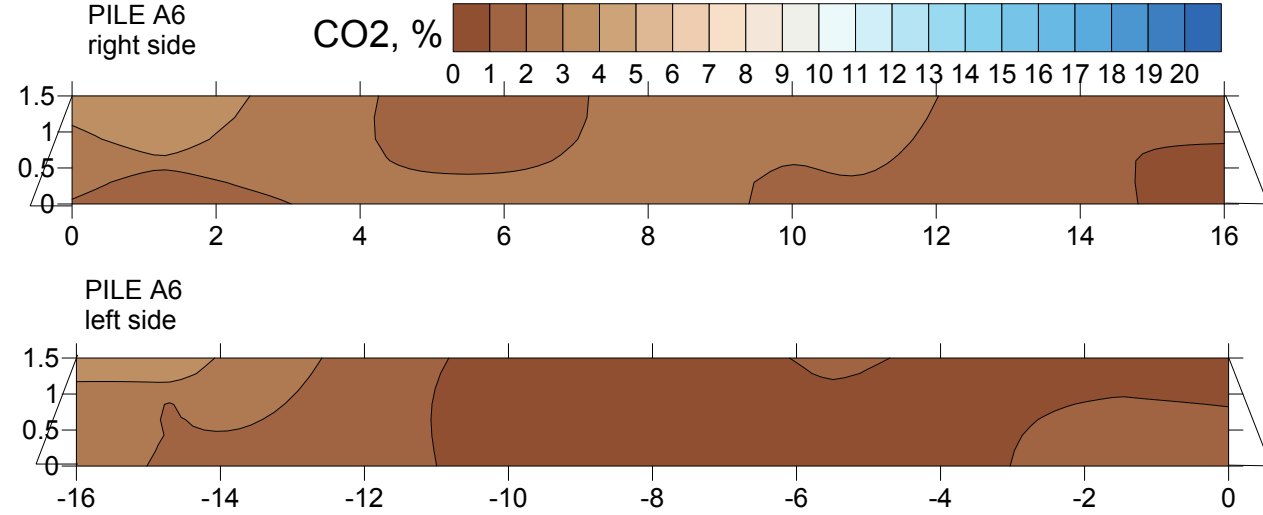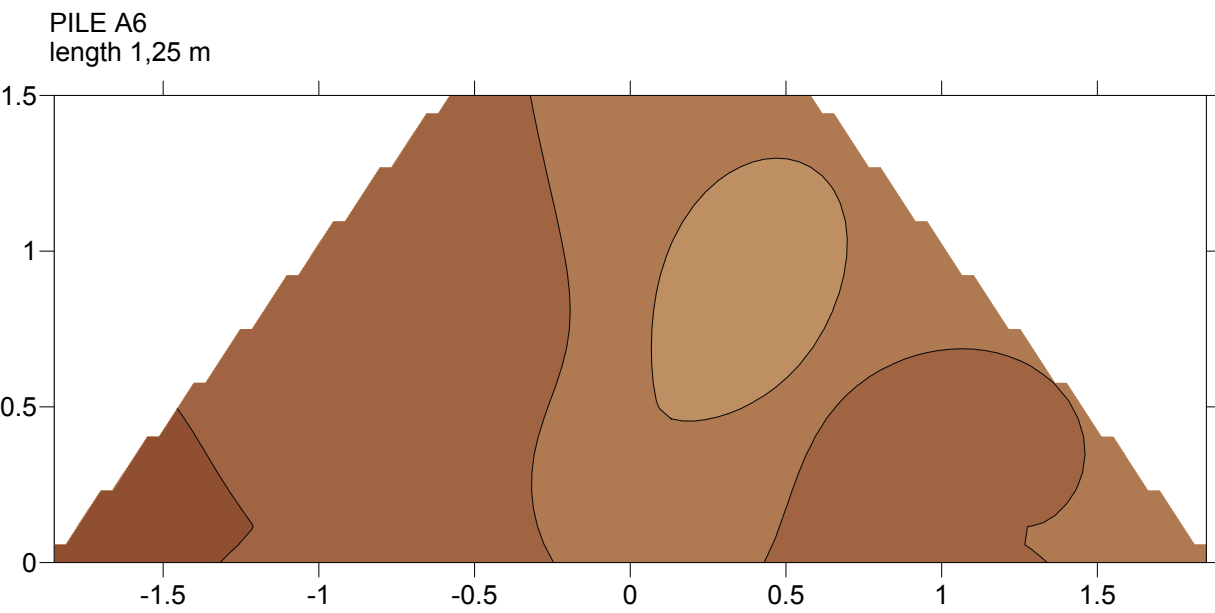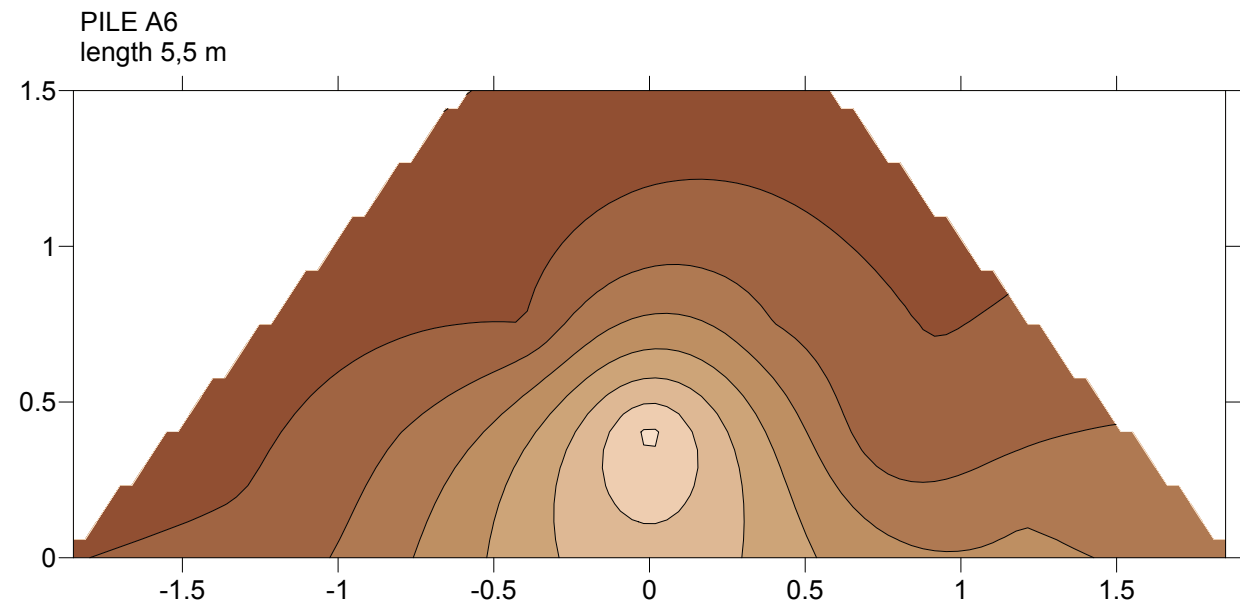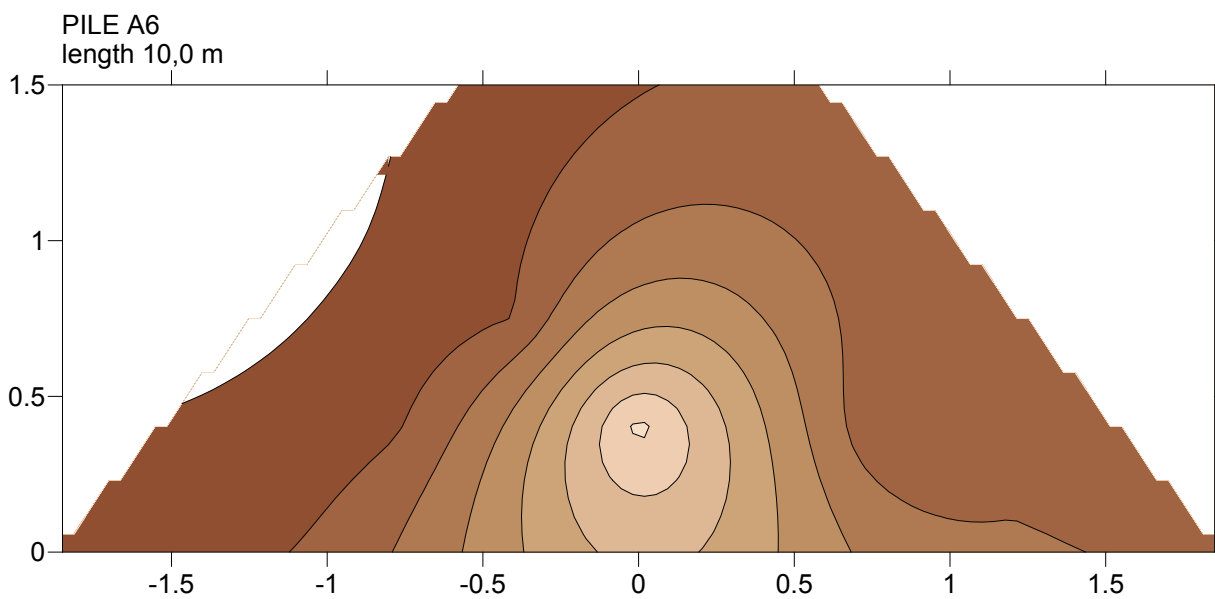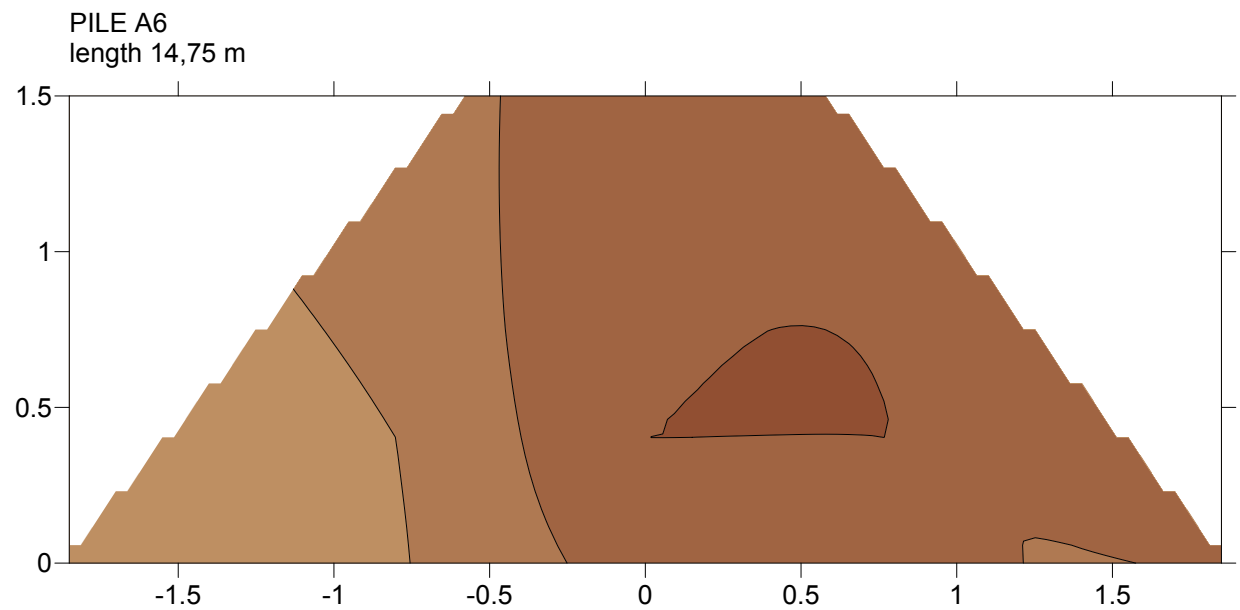

Supplement: s1 [file s1]

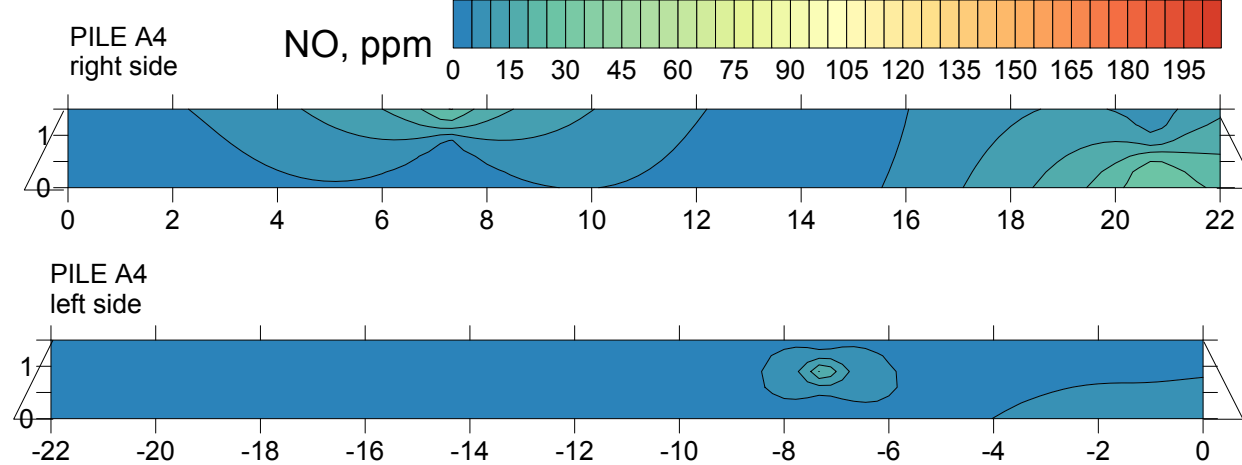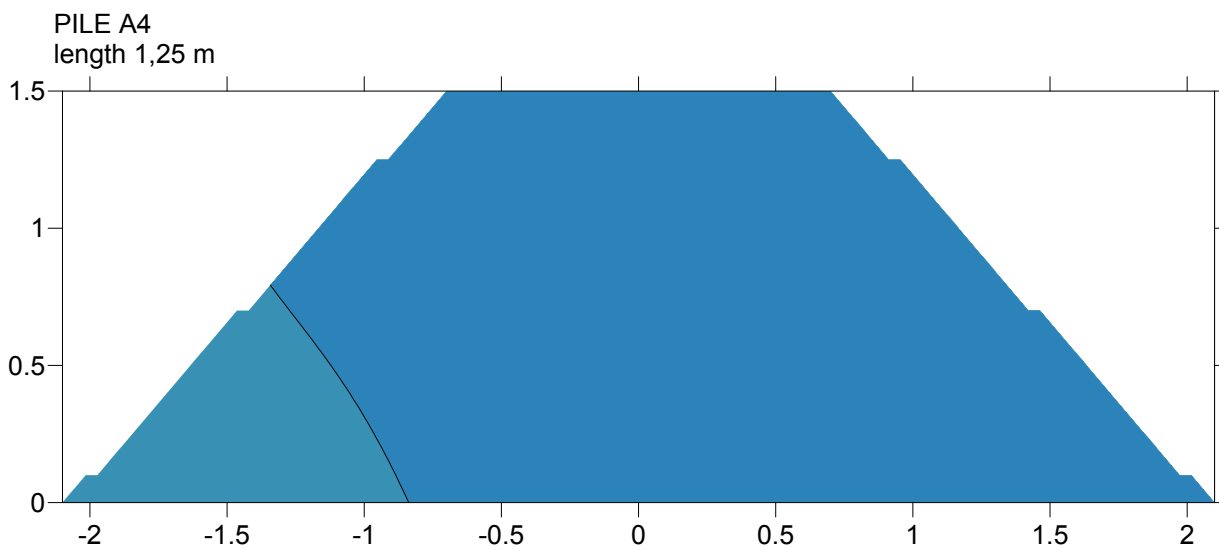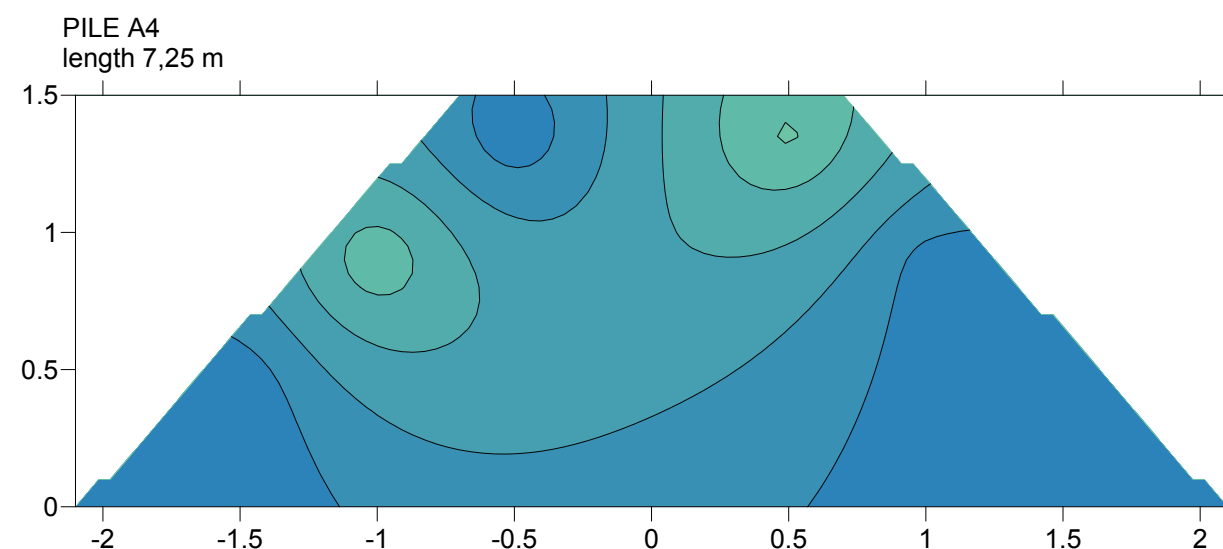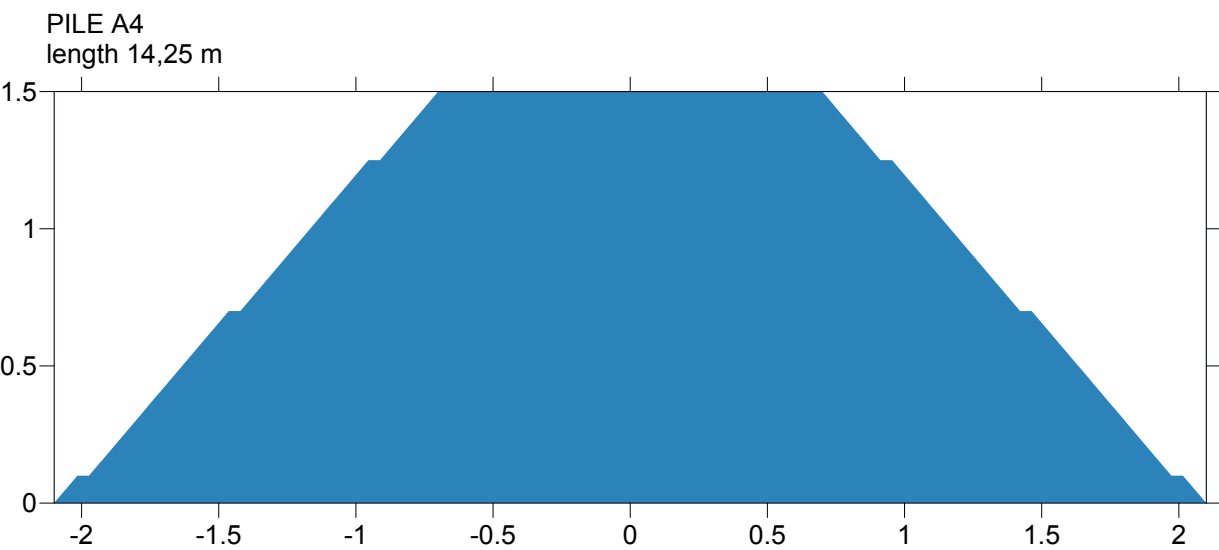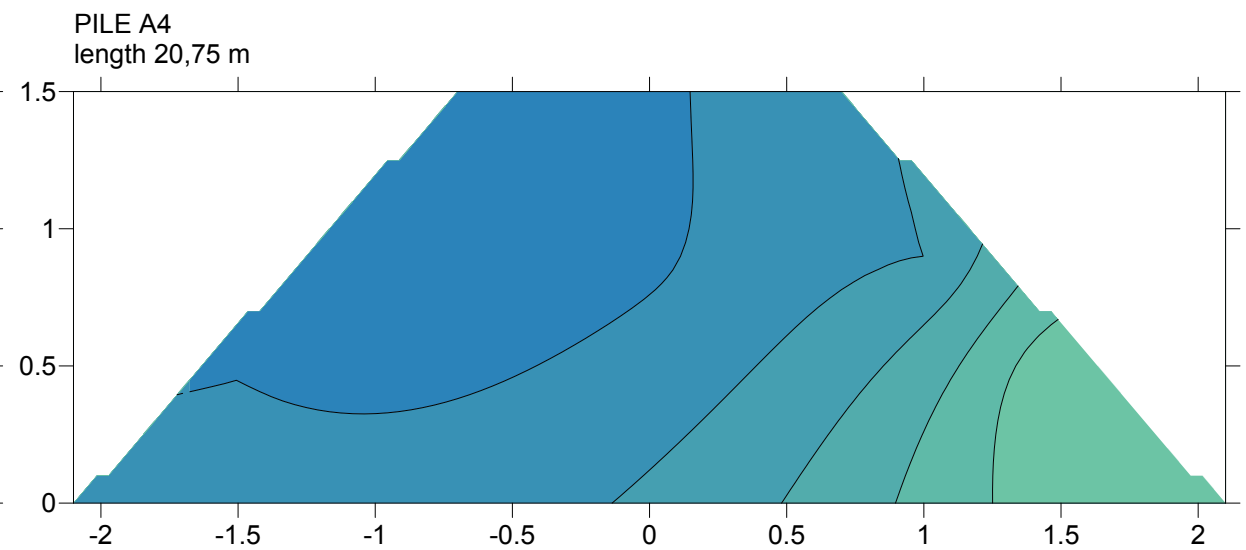

Supplement: s1 [file s1]

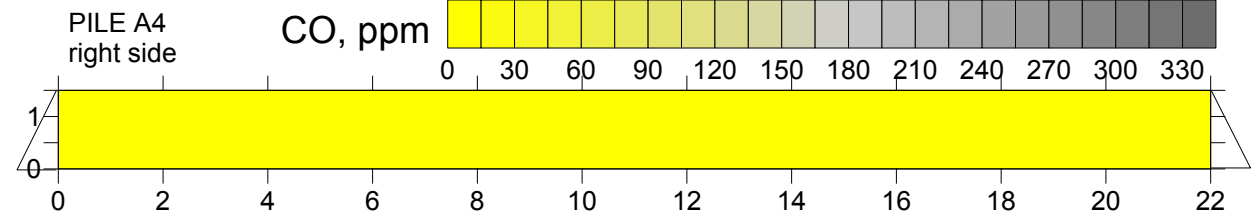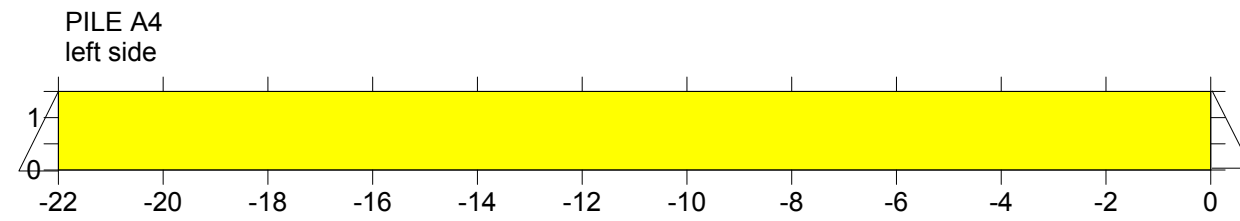

PILE A4  
length 1,25 m

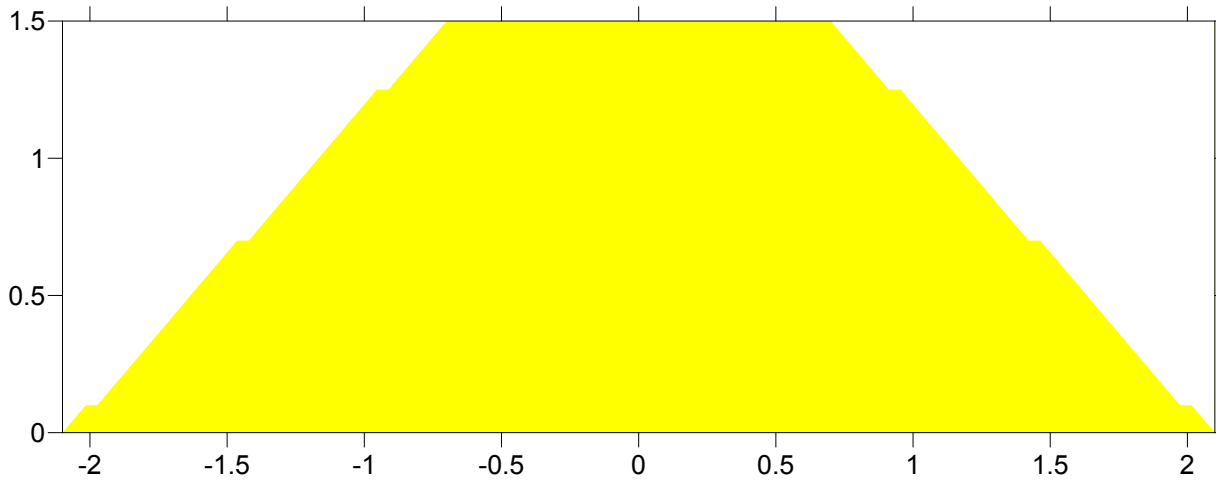

PILE A4  
length 7,25 m

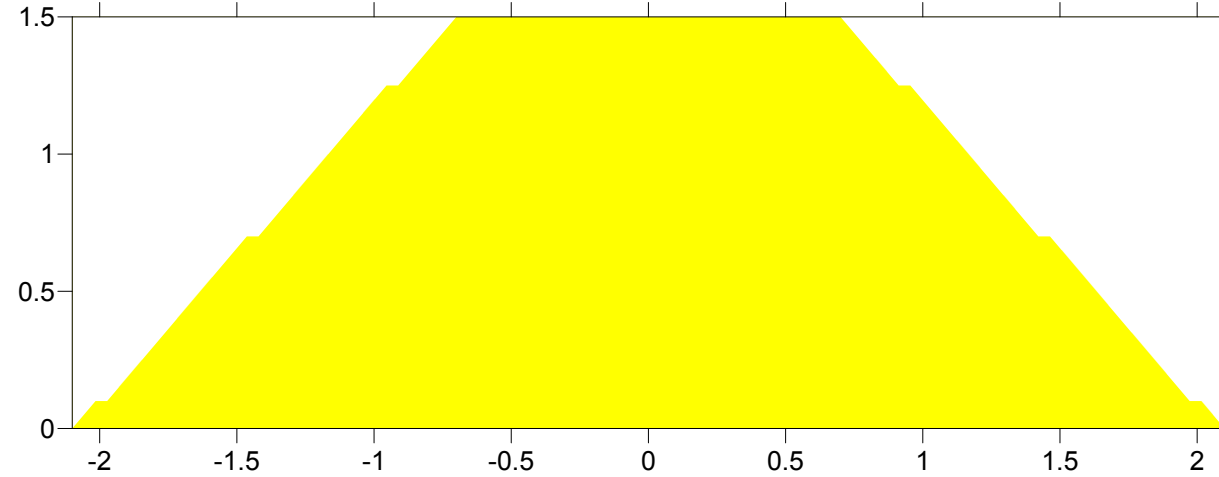

PILE A4  
length 14,25 m

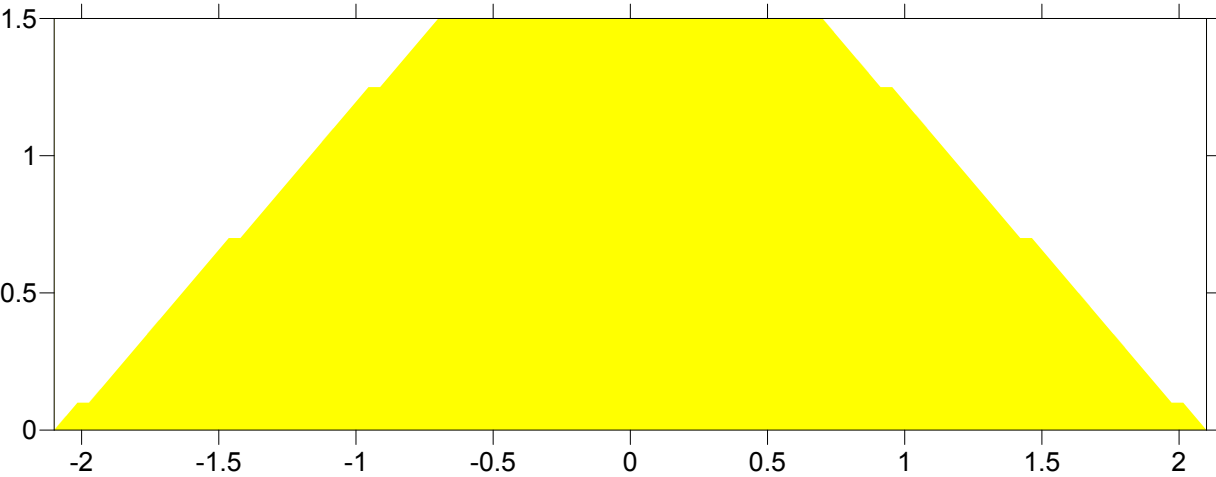

PILE A4  
length 20,75 m

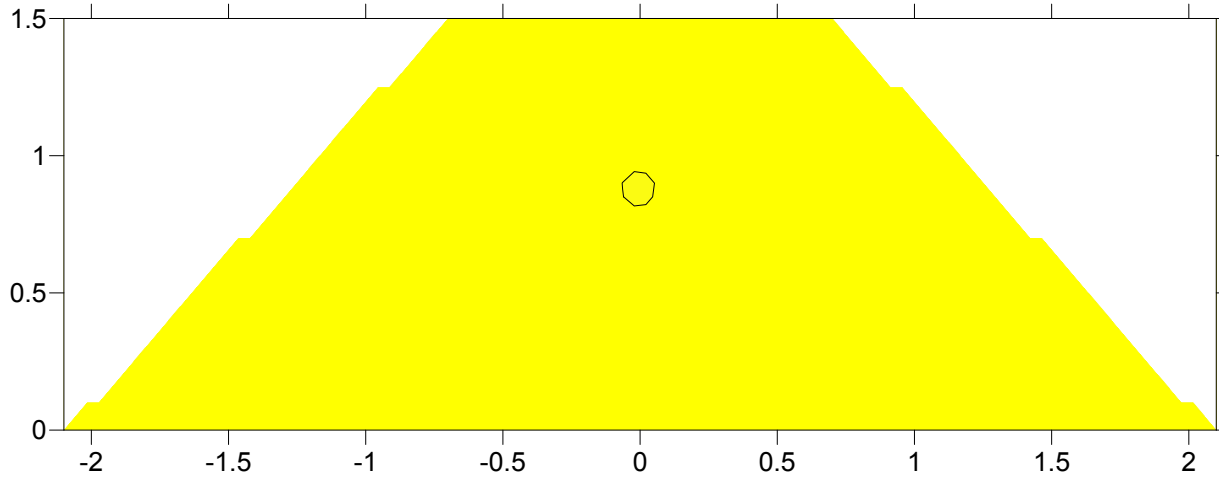

Supplement: s1 [file s1]

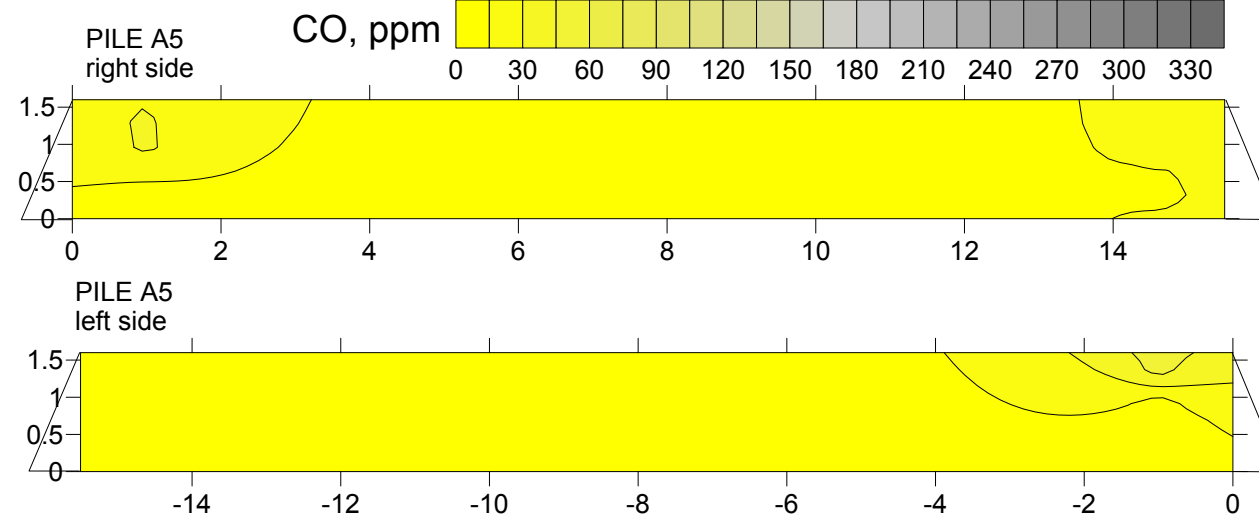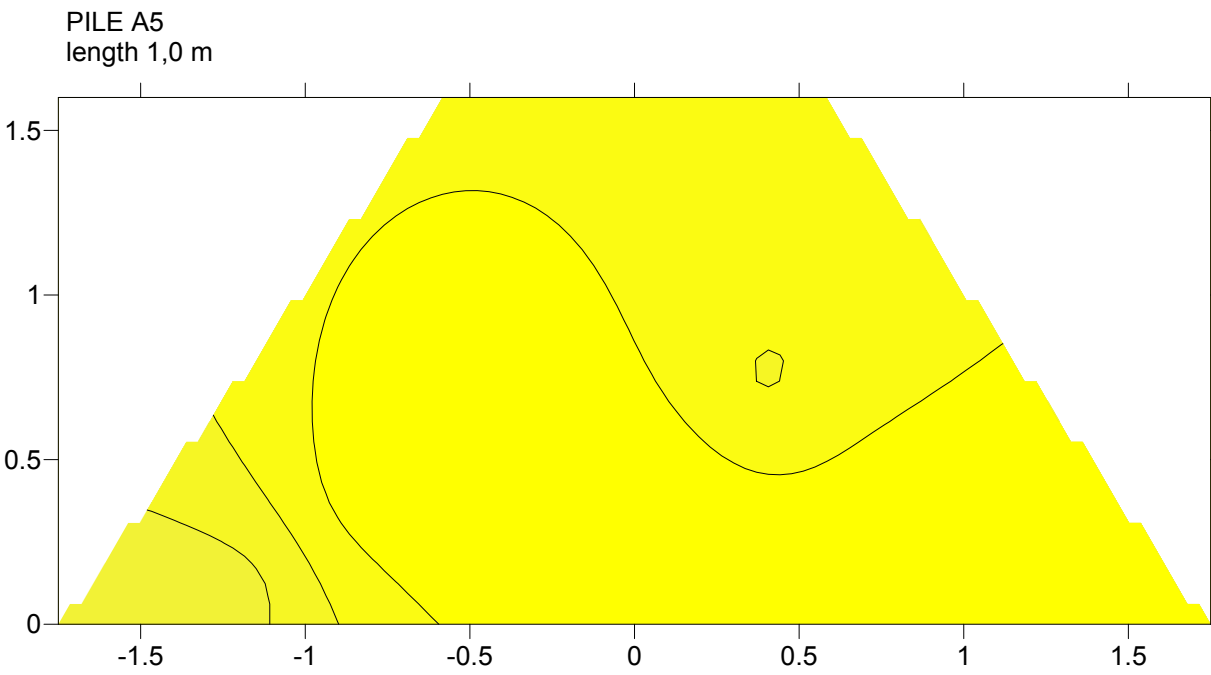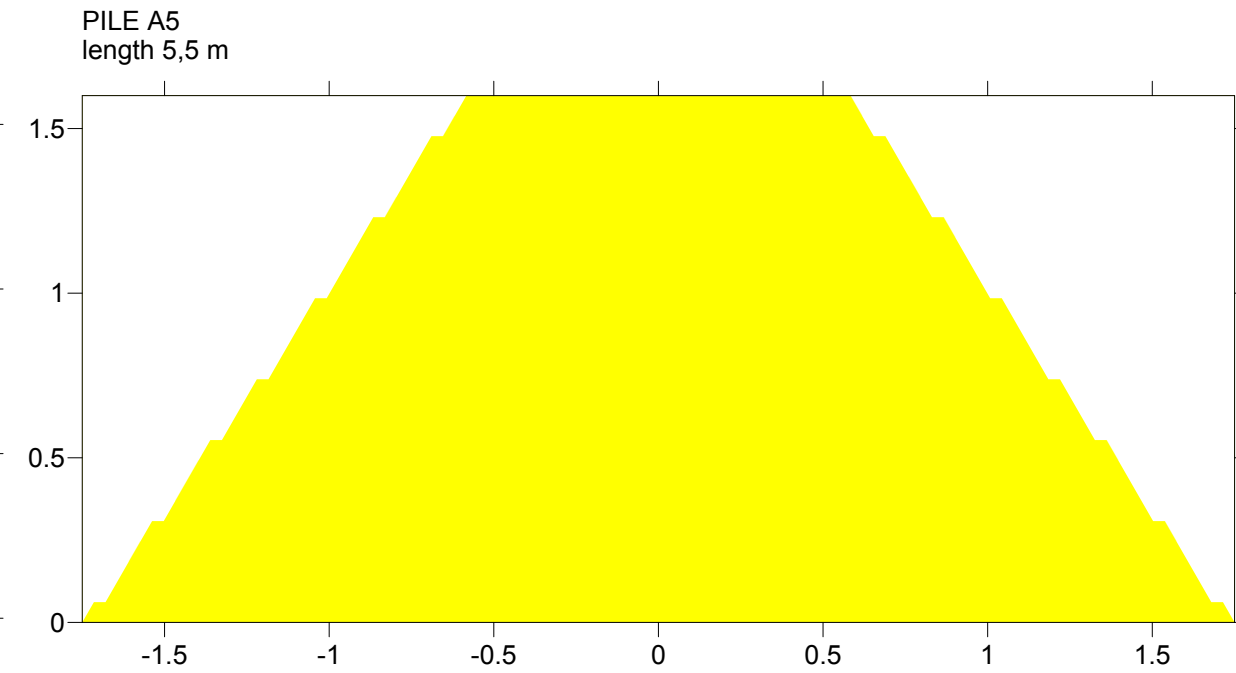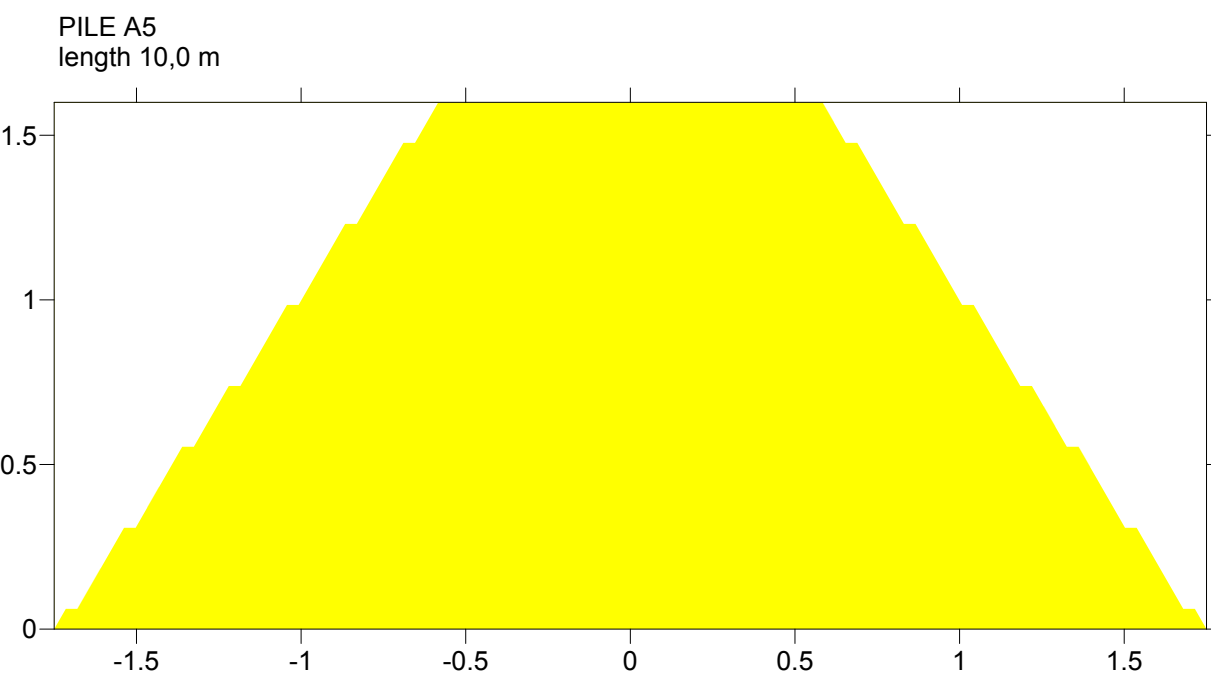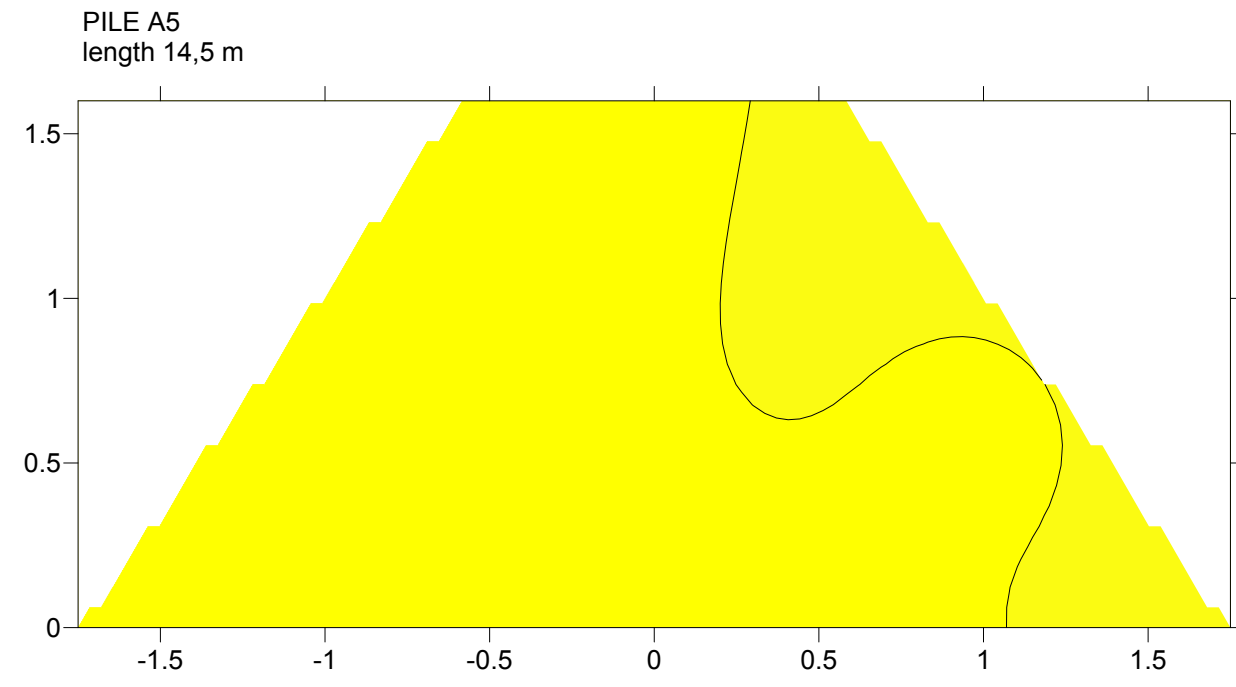

Supplement: s1 [file s1]

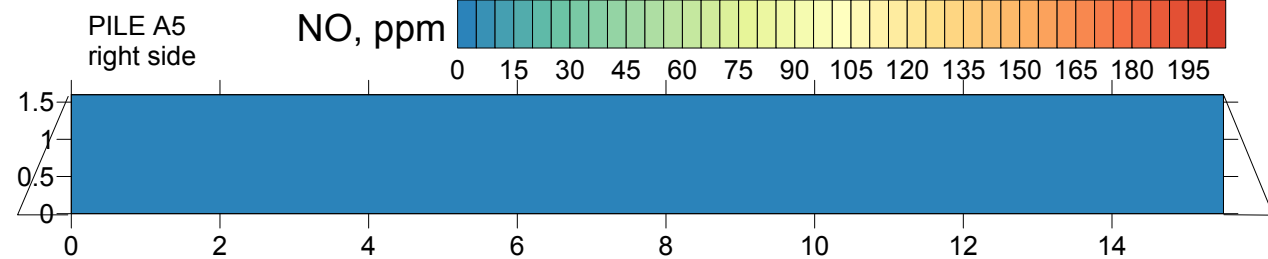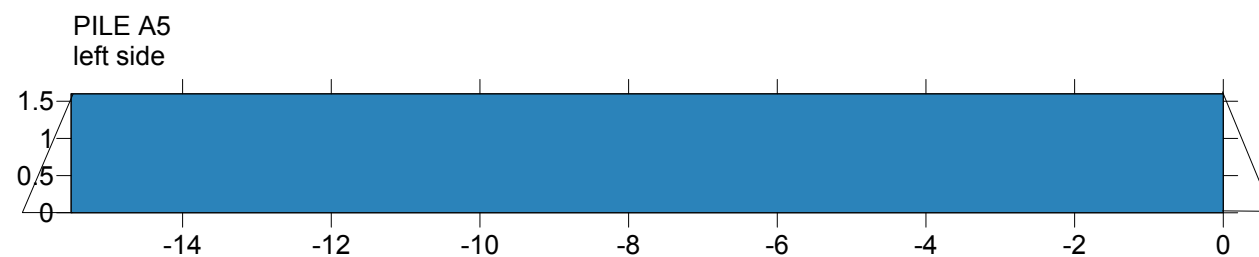

PILE A5  
length 1,0 m

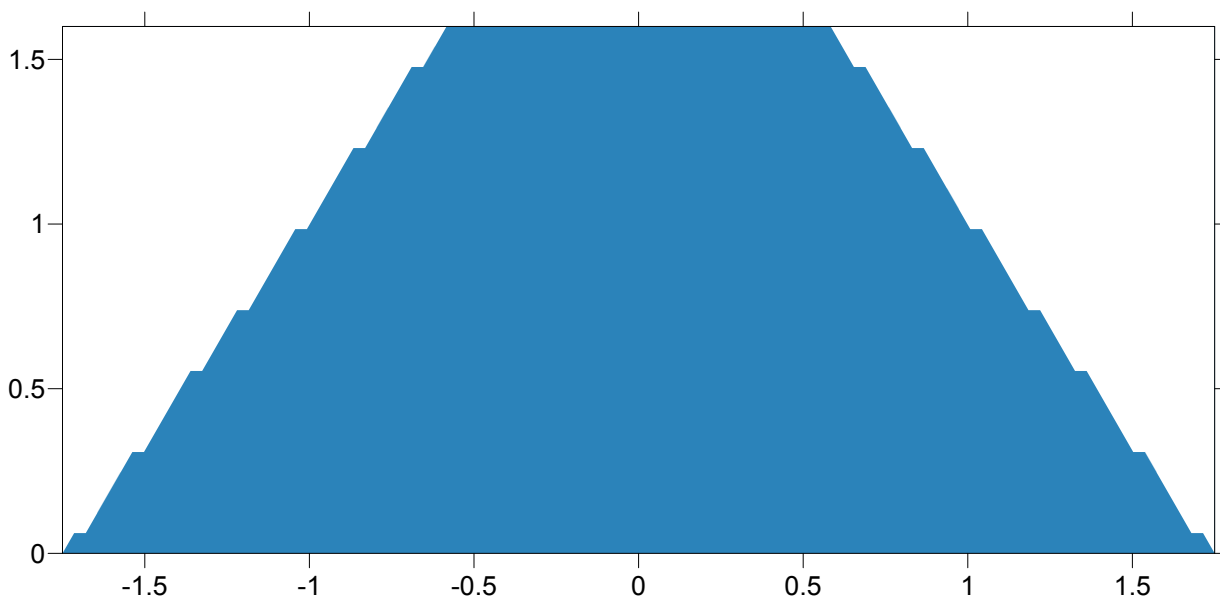

PILE A5  
length 5,5 m

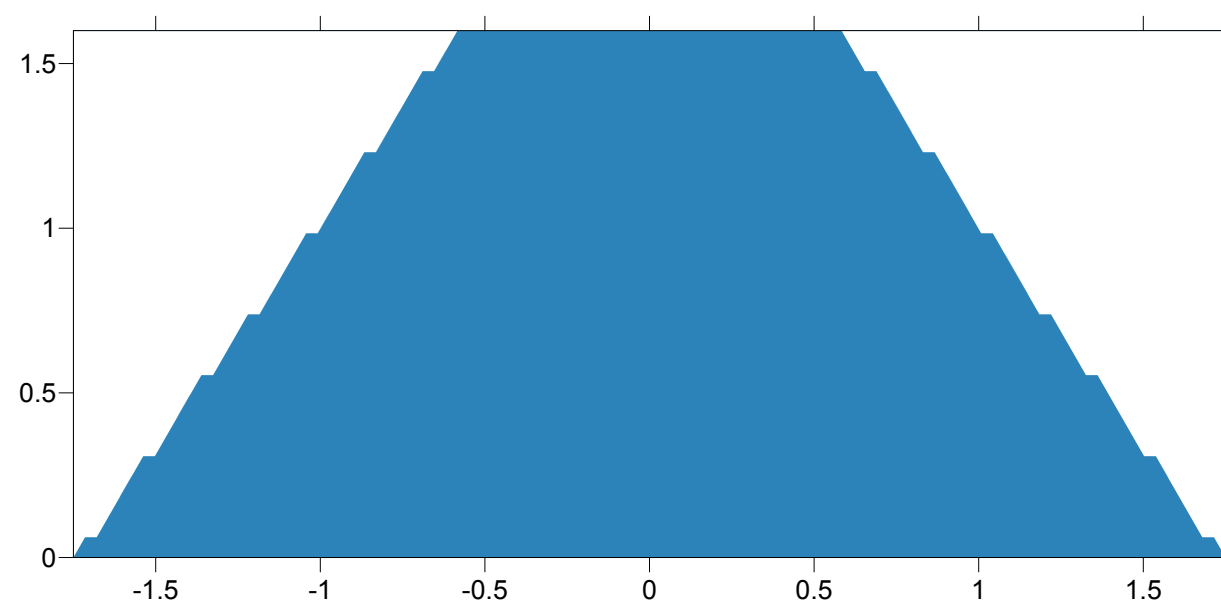

PILE A5  
length 10,0 m

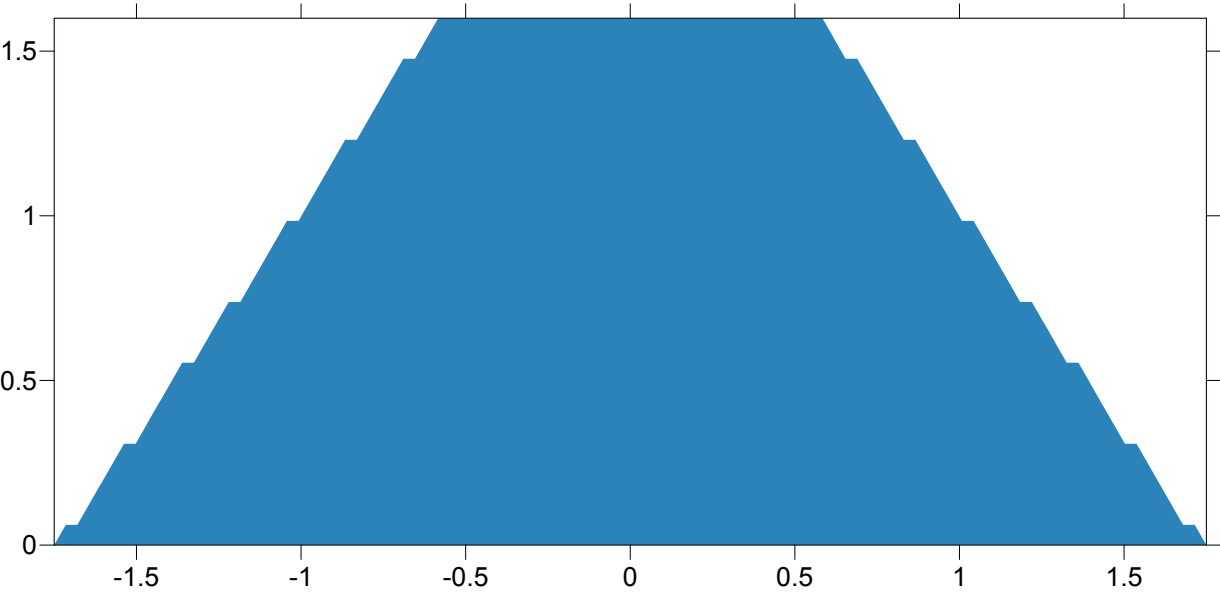

PILE A5  
length 14,5 m

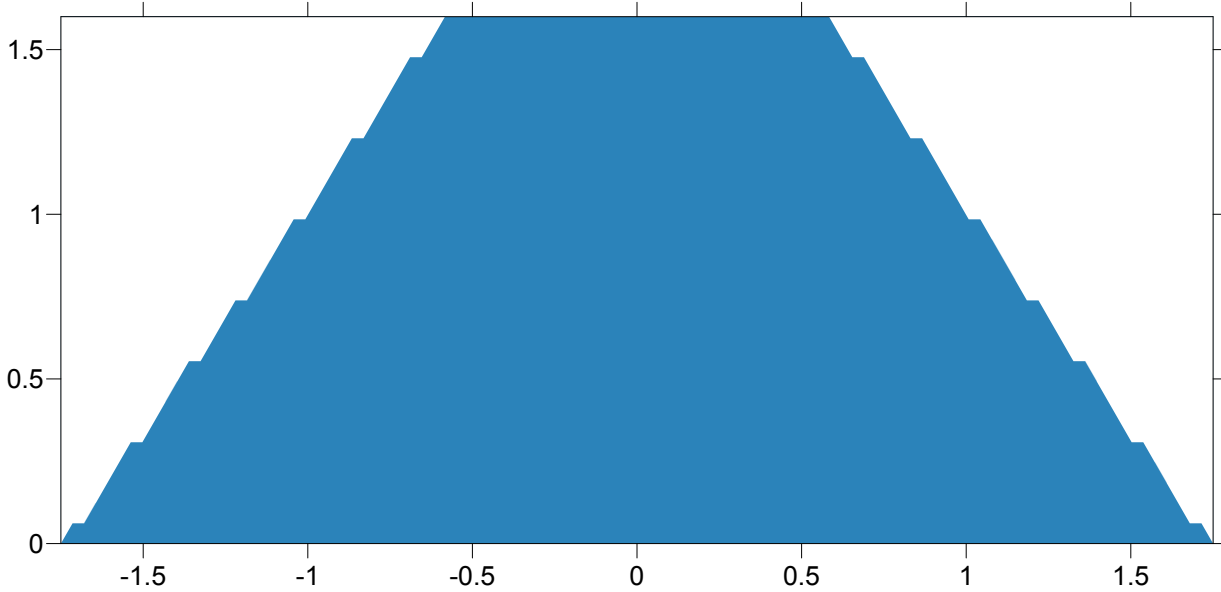

Supplement: s1 [file s1]

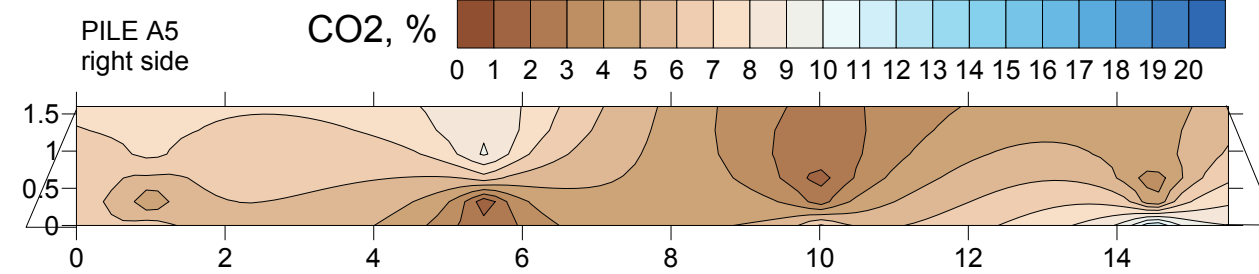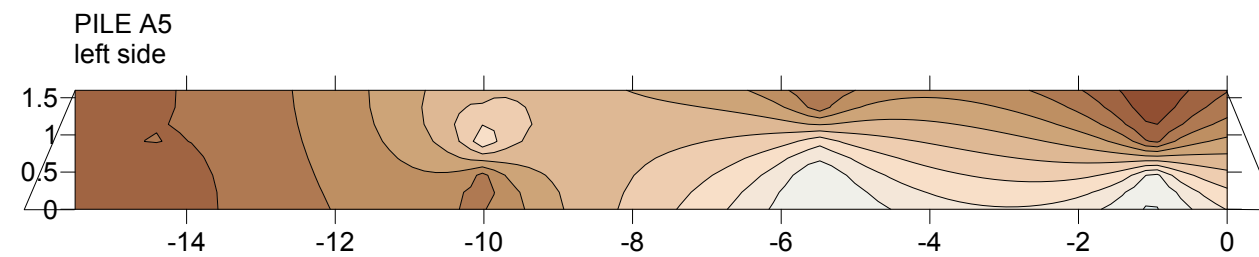

PILE A5  
length 1,0 m

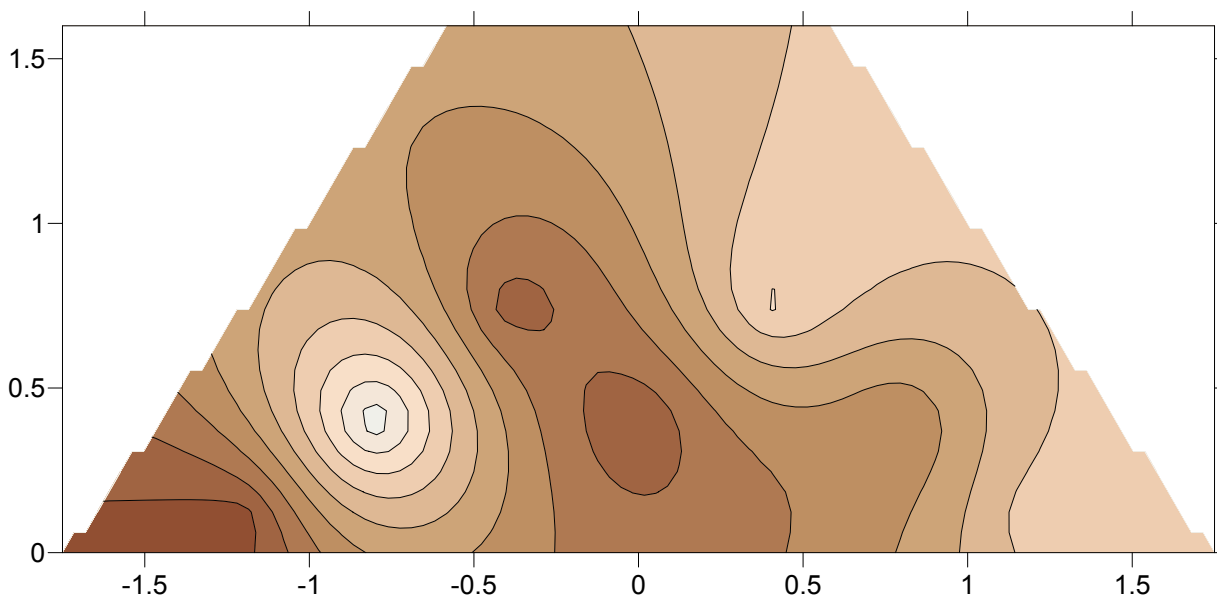

PILE A5  
length 5,5 m

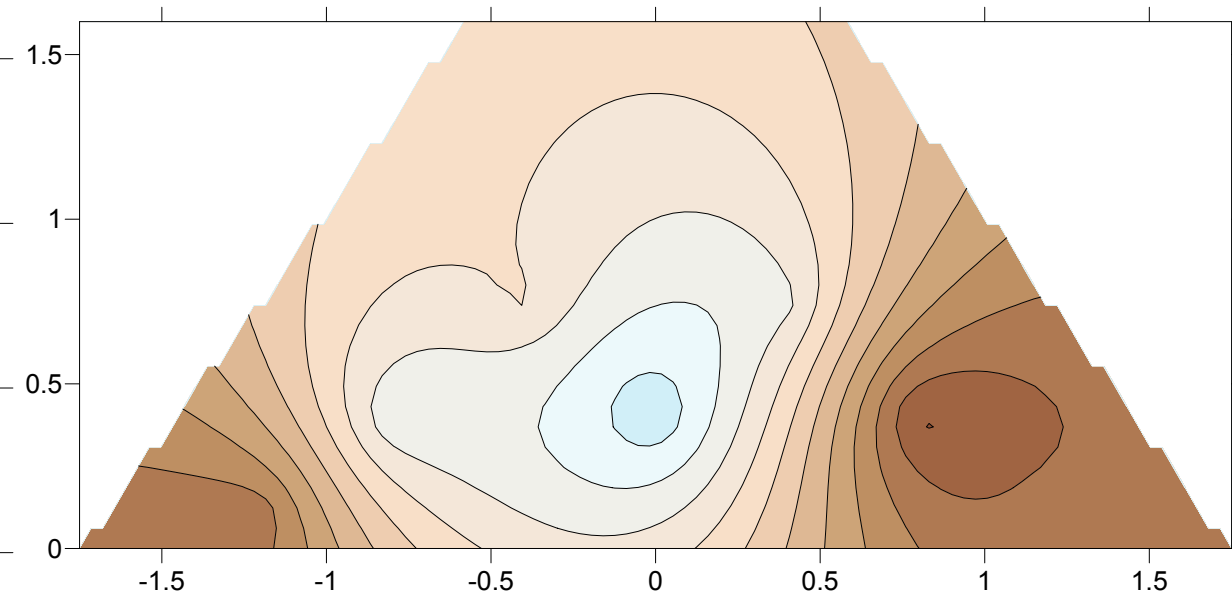

PILE A5  
length 10,0 m

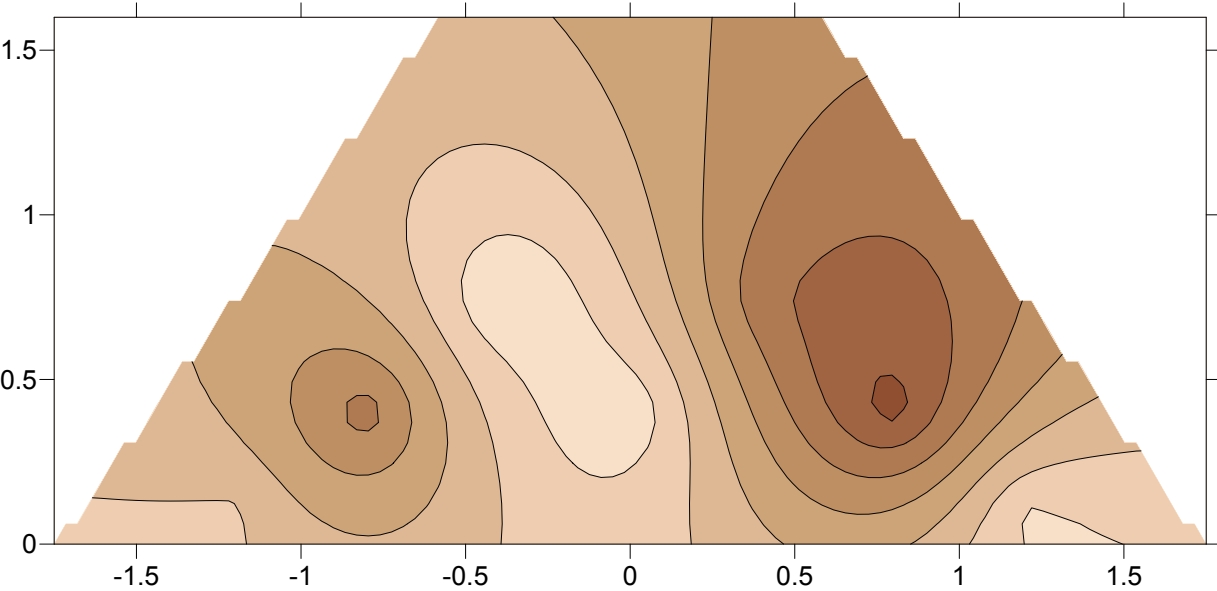

PILE A5  
length 14,5 m

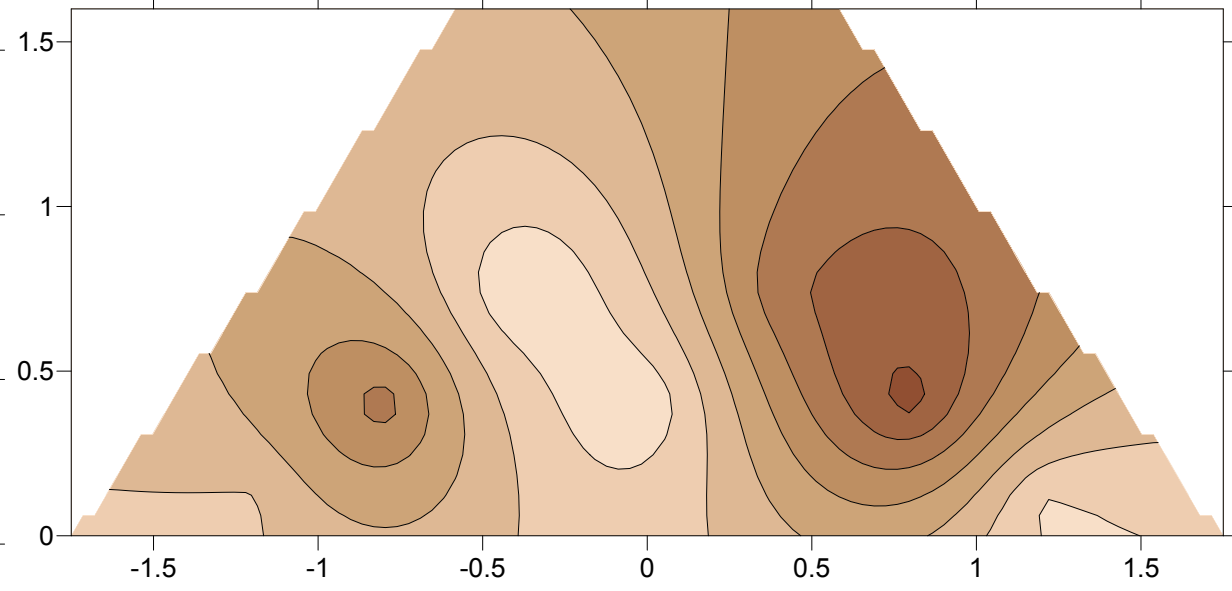

Supplement: s1 [file s1]

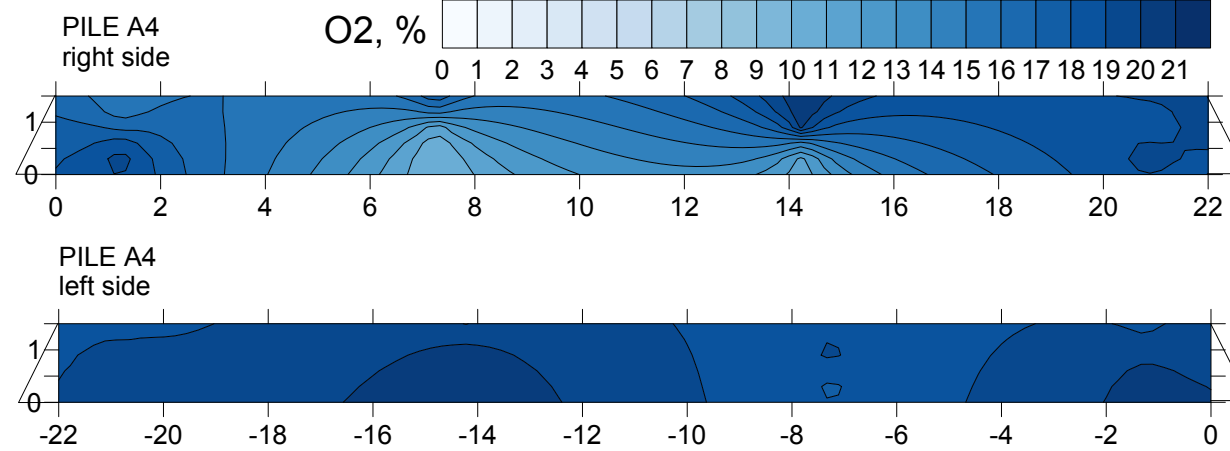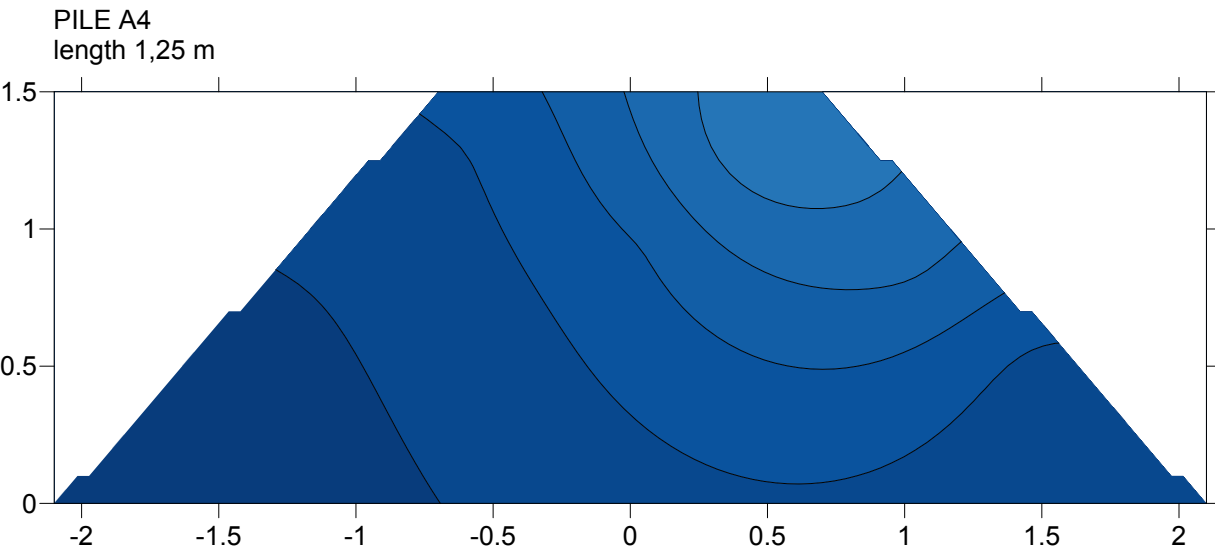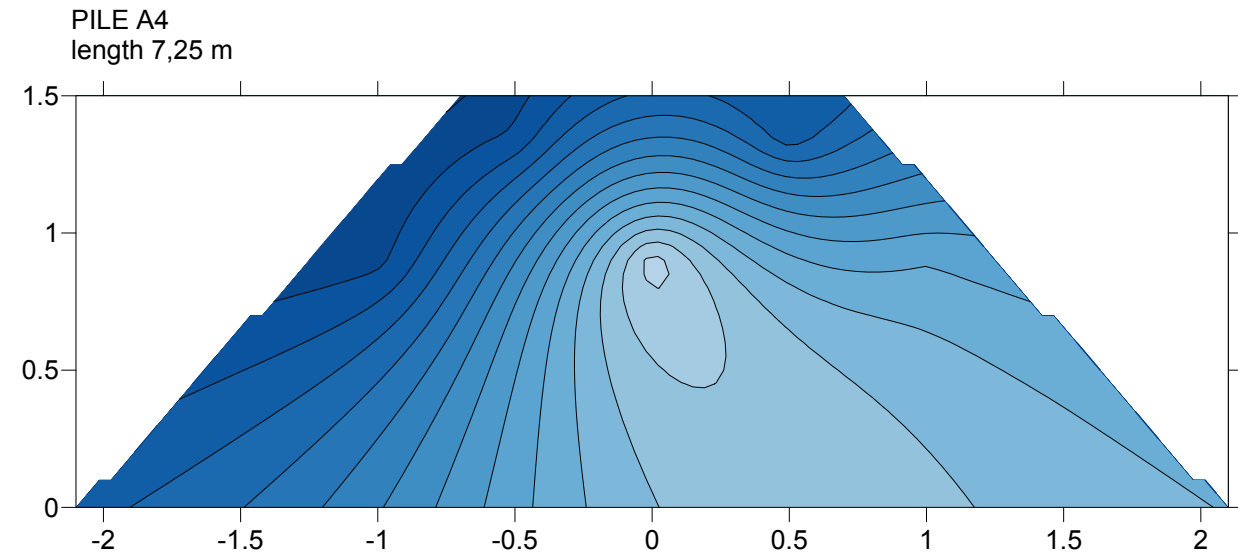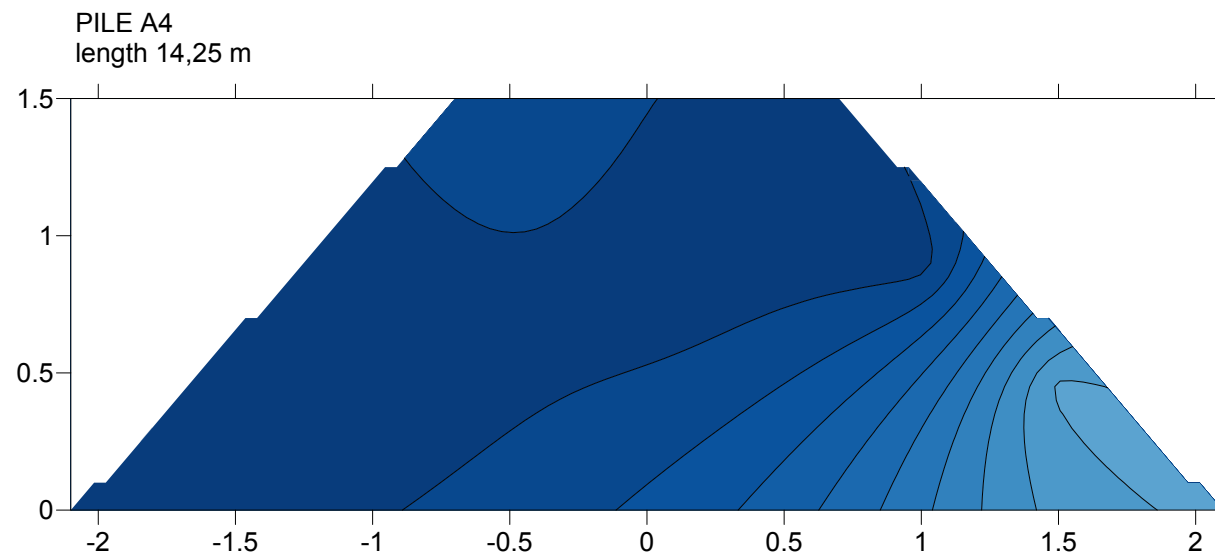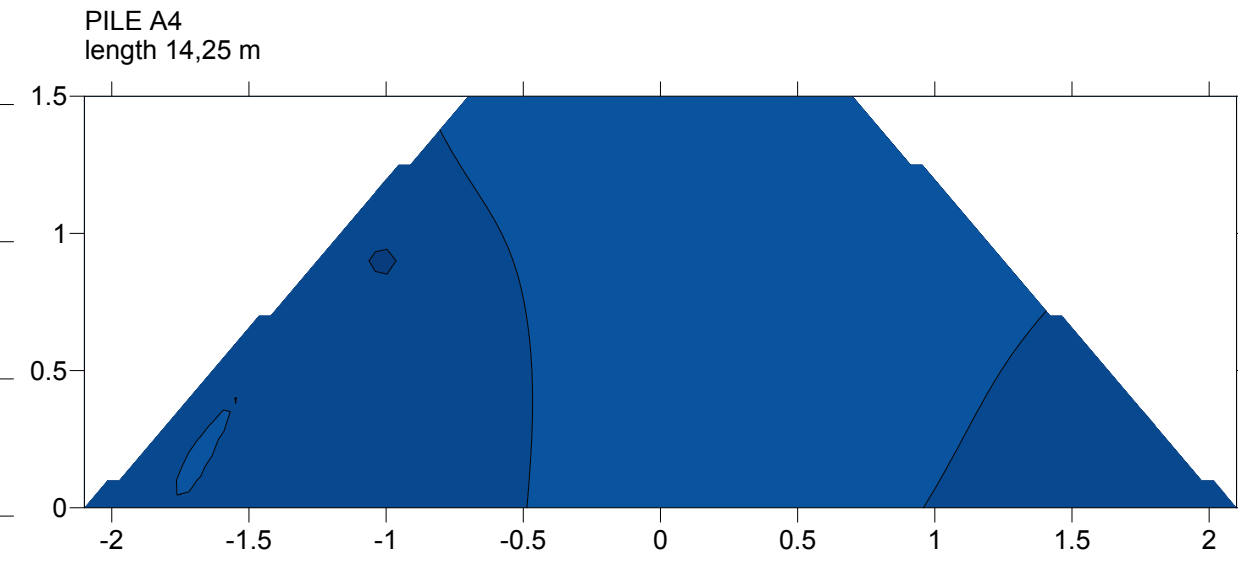

Supplement: s1 [file s1]

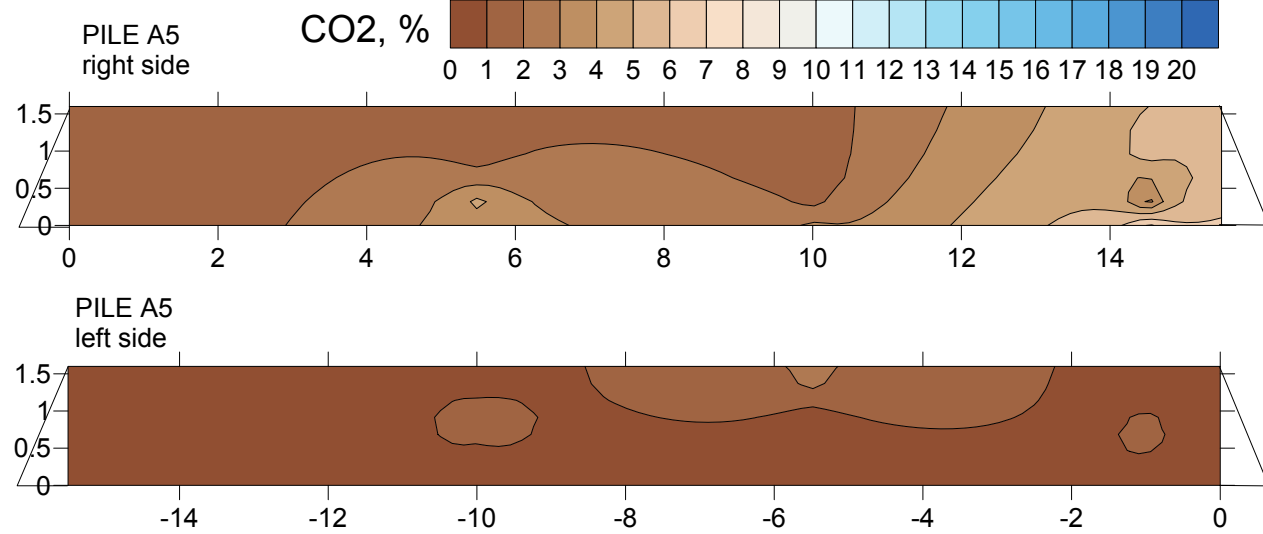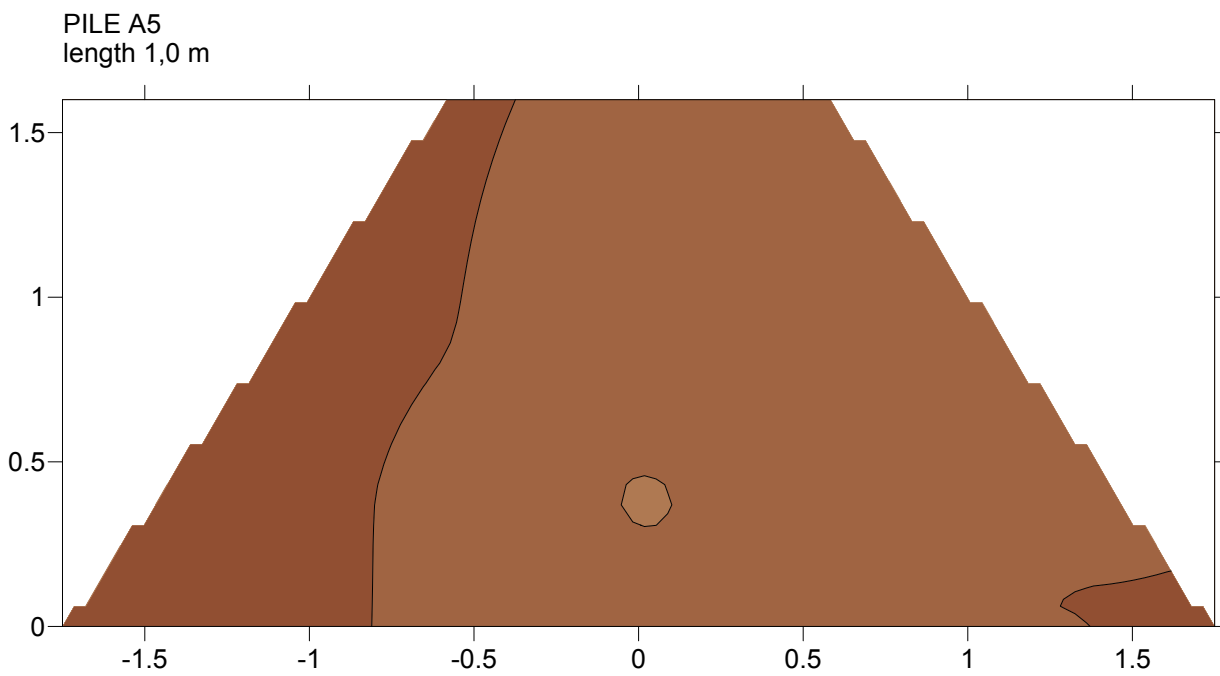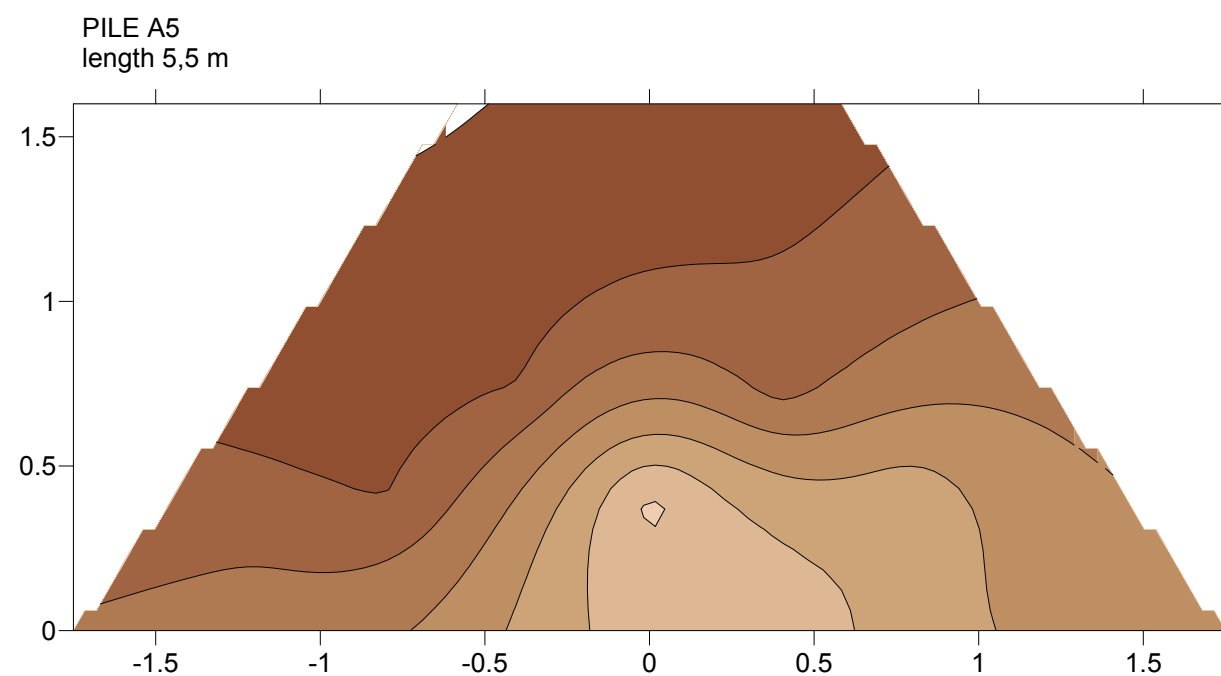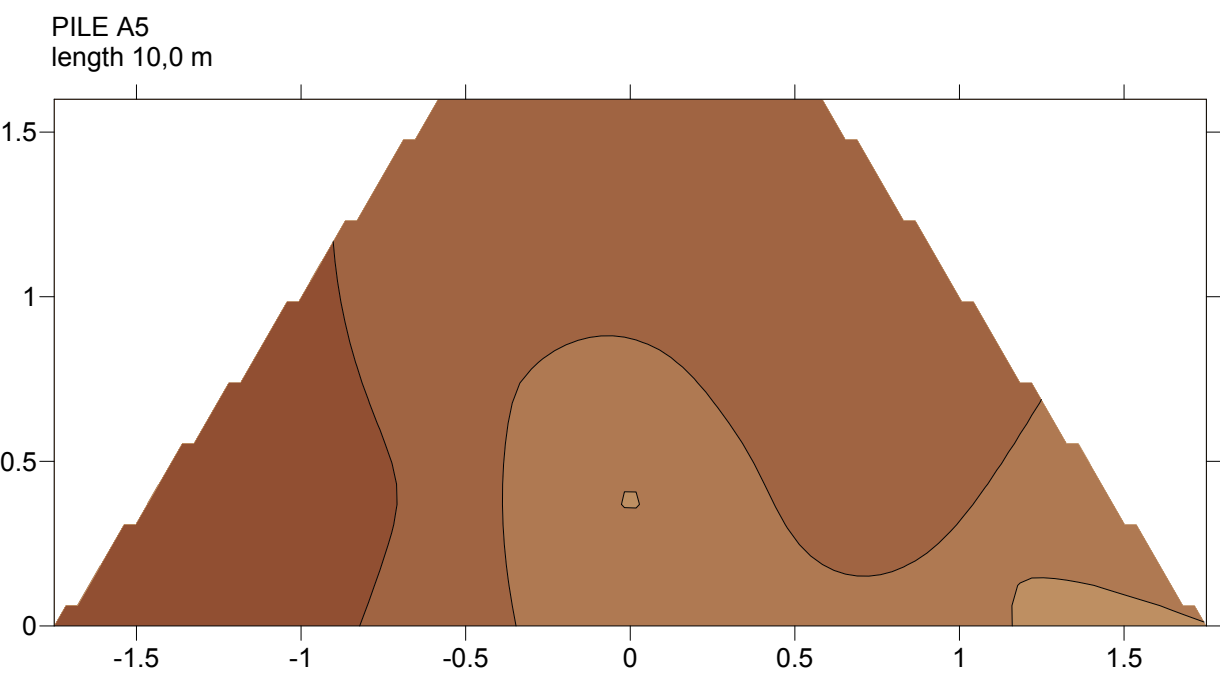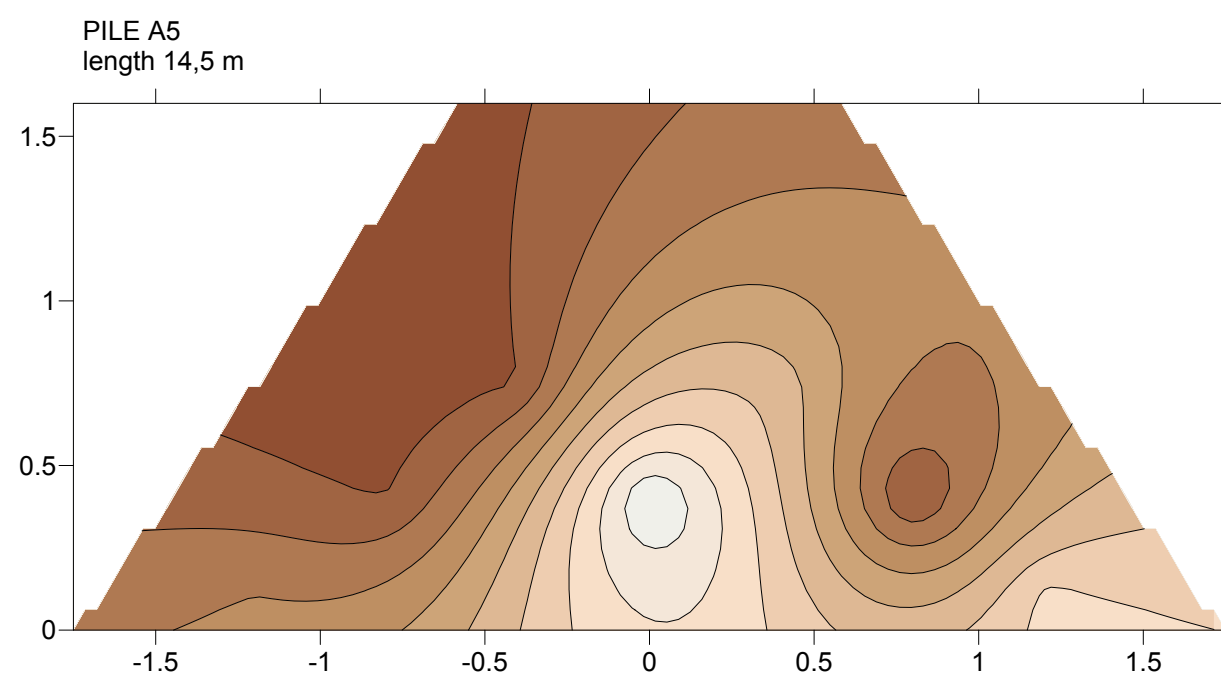

Supplement: s1 [file s1]

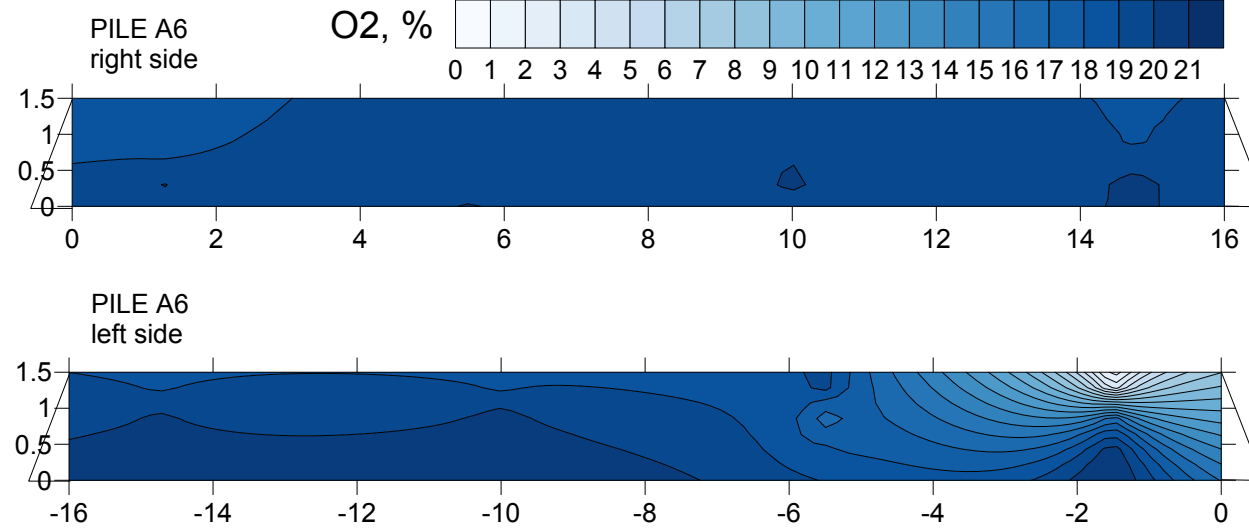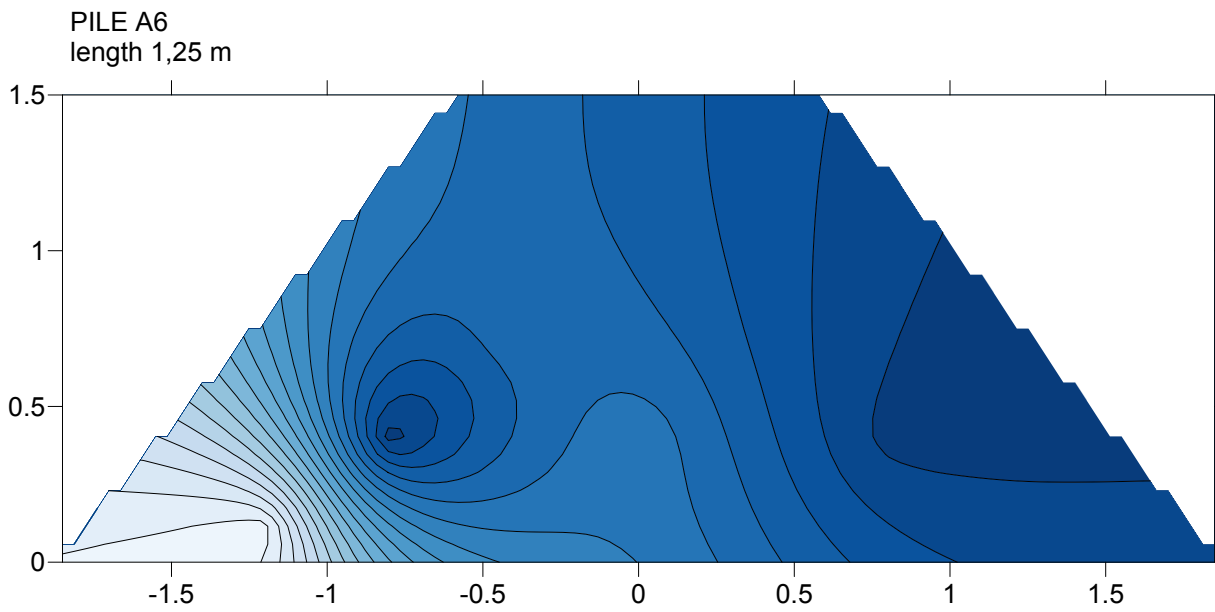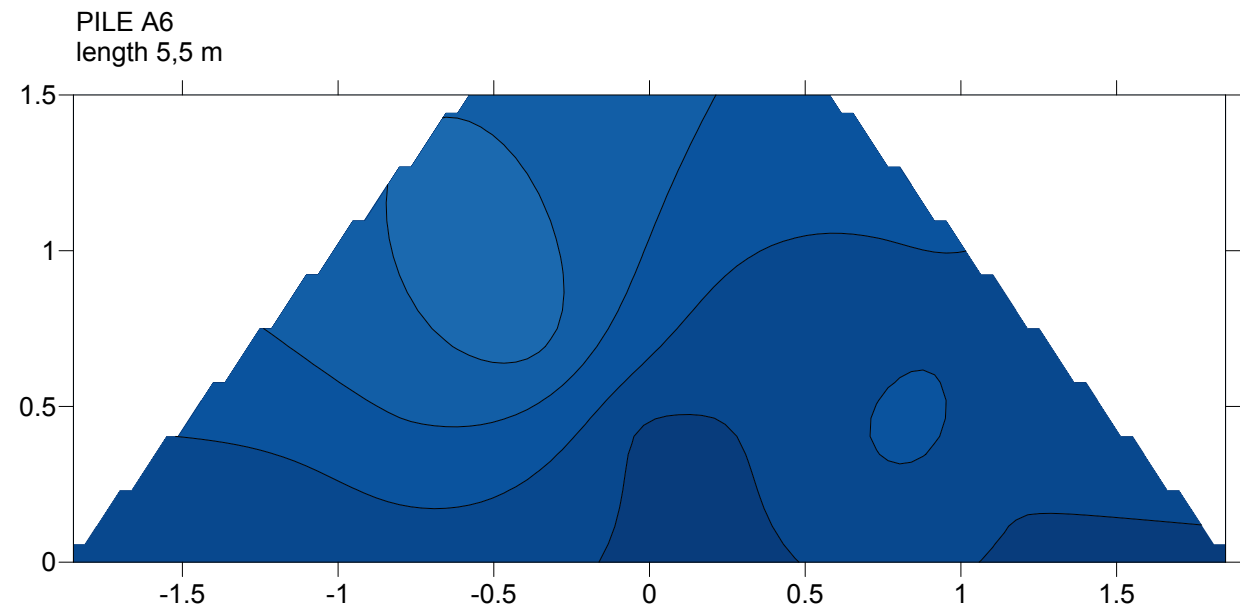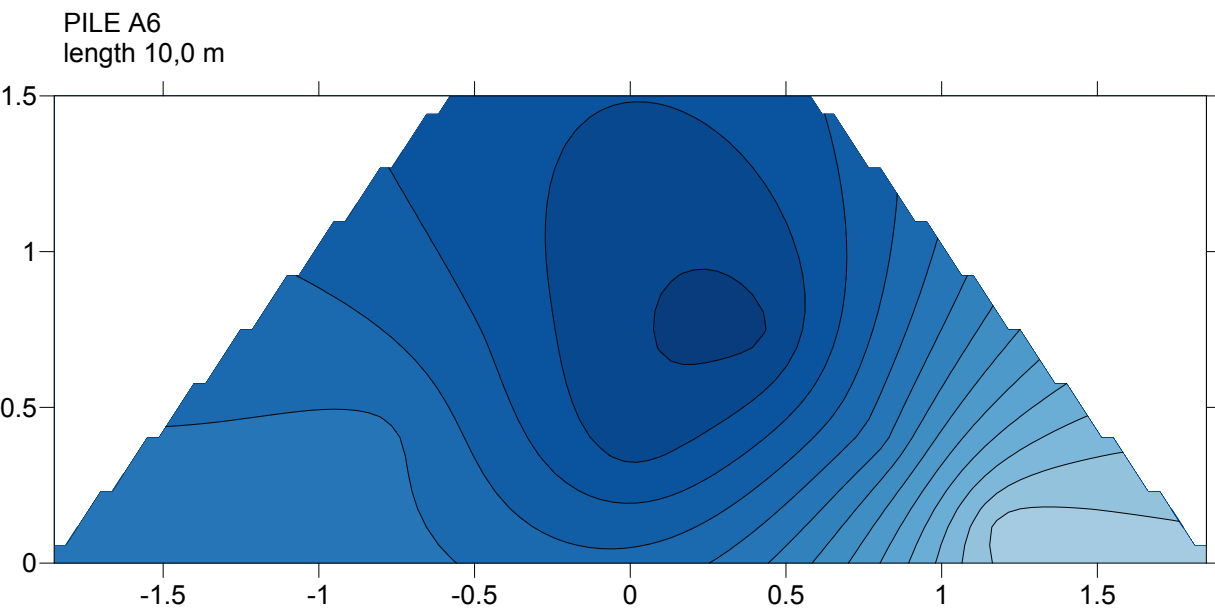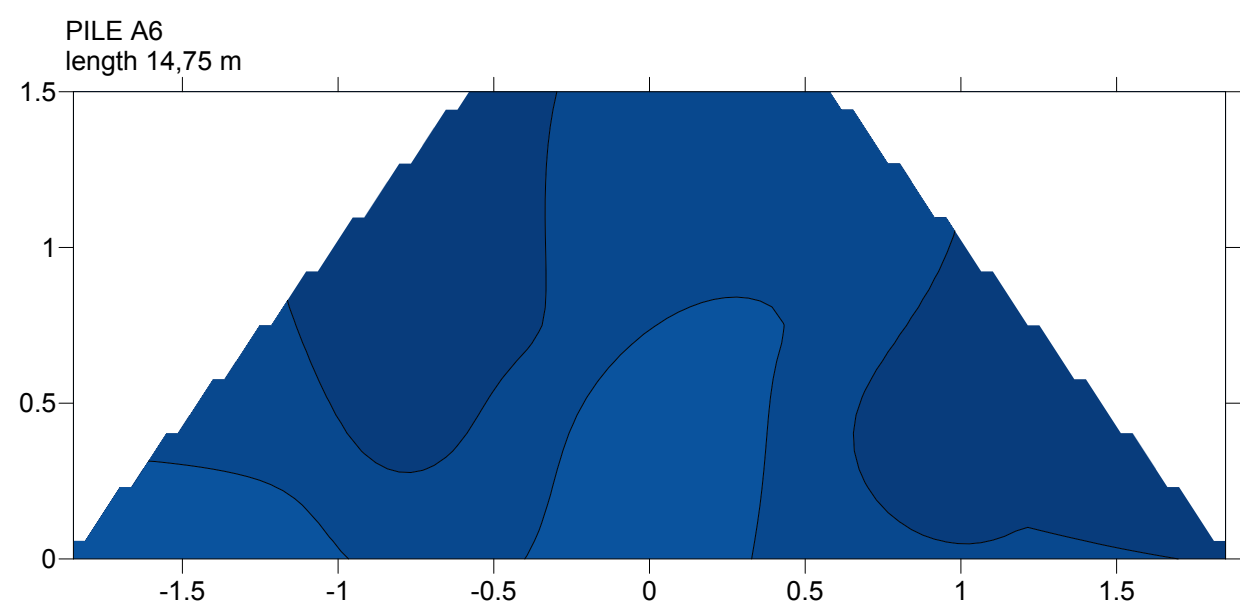

Supplement: s1 [file s1]

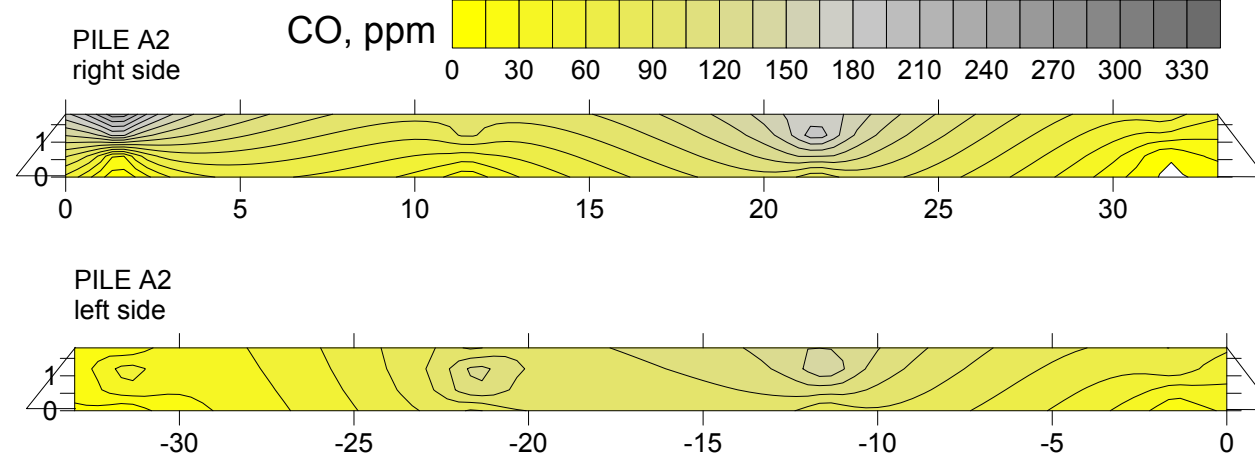

PILE A2  
length 1,5 m

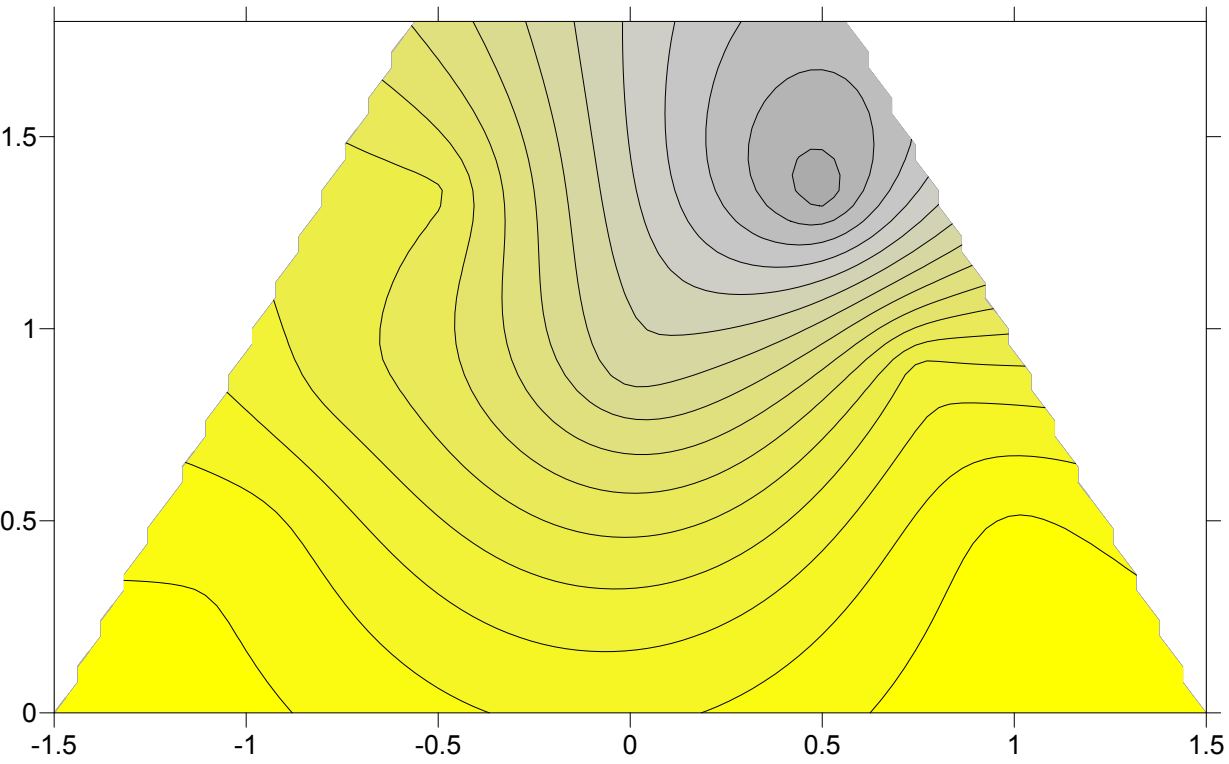

PILE A2  
length 11,5 m

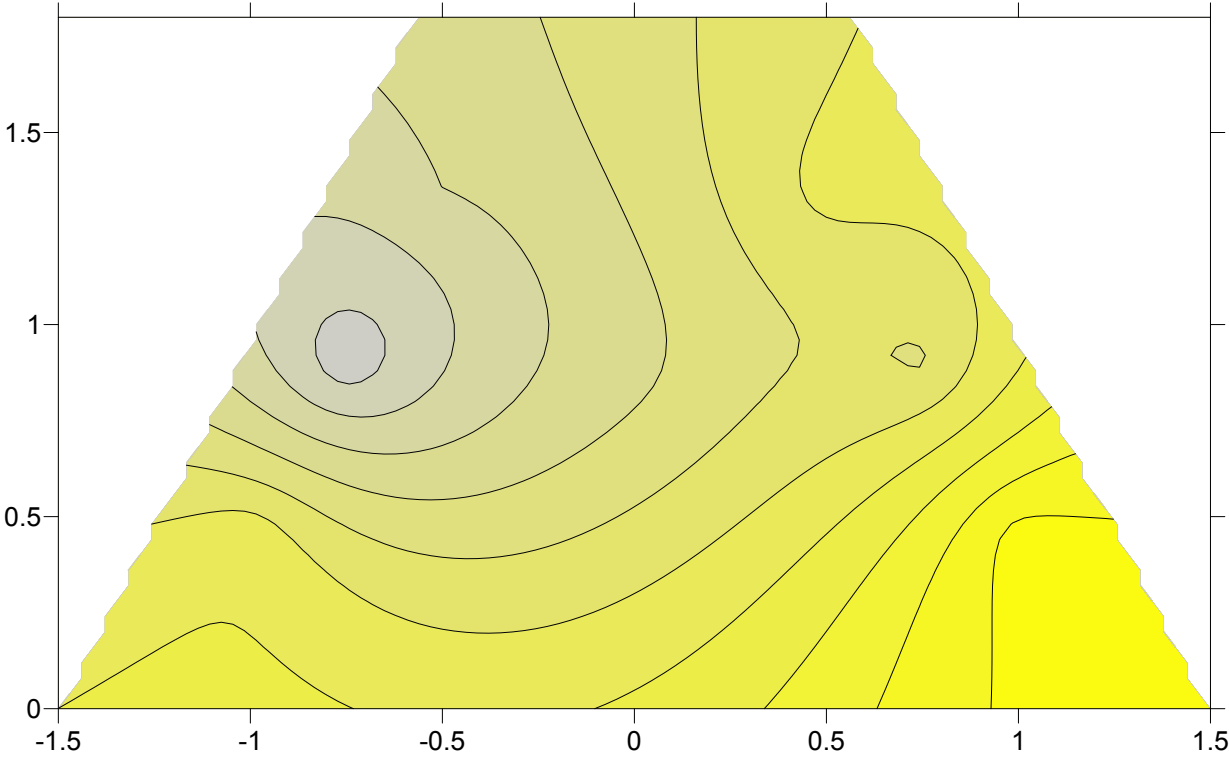

PILE A2  
length 21,5 m

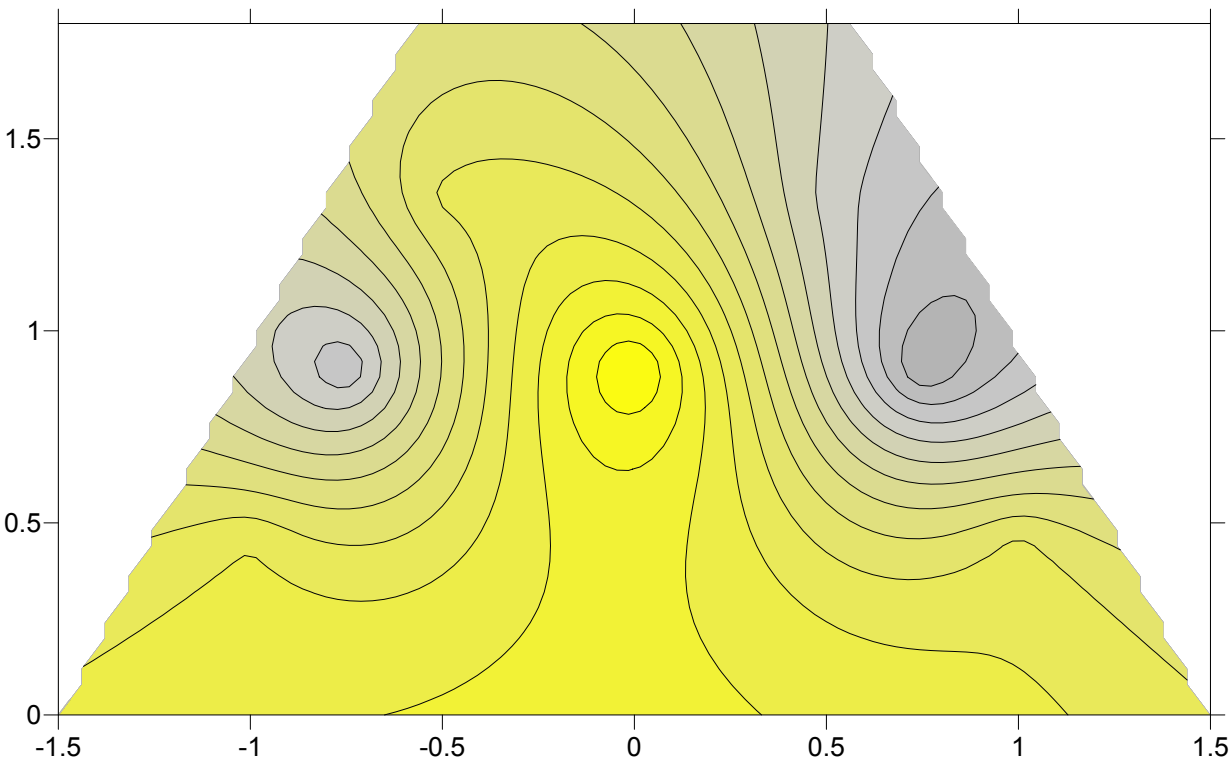

PILE A2  
length 31,5 m

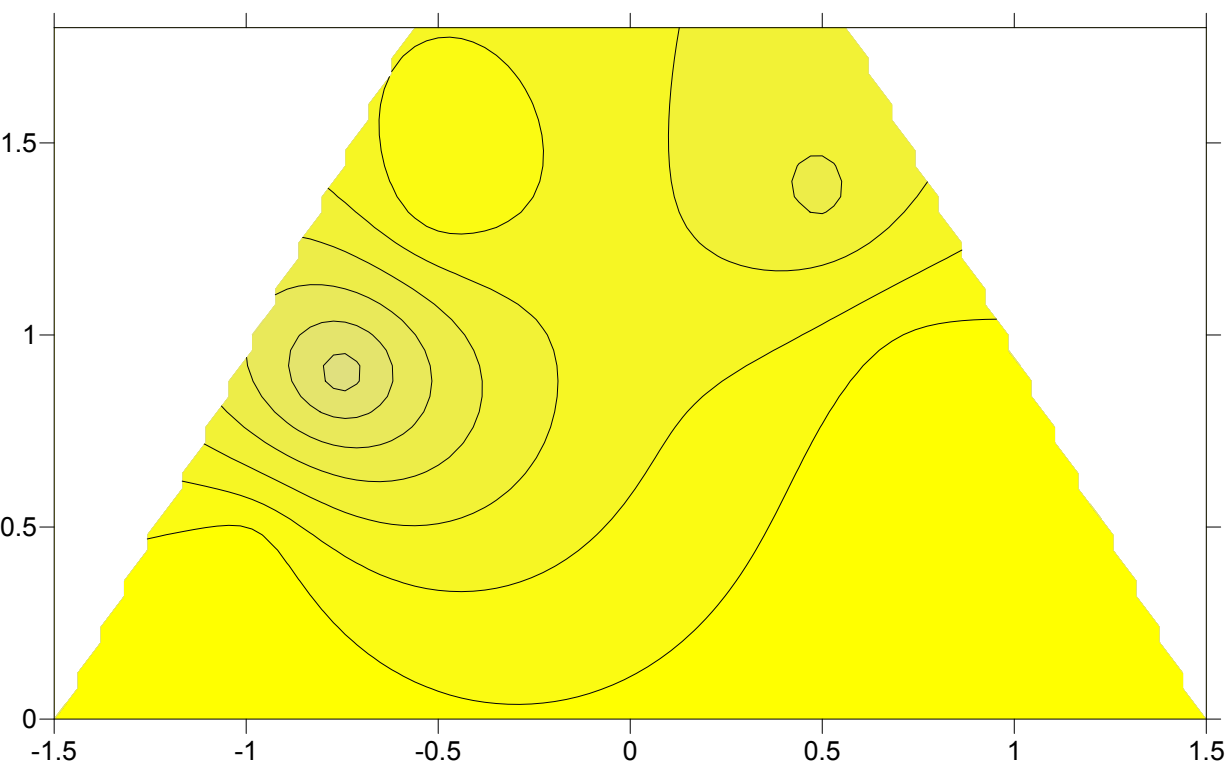

Supplement: s1 [file s1]

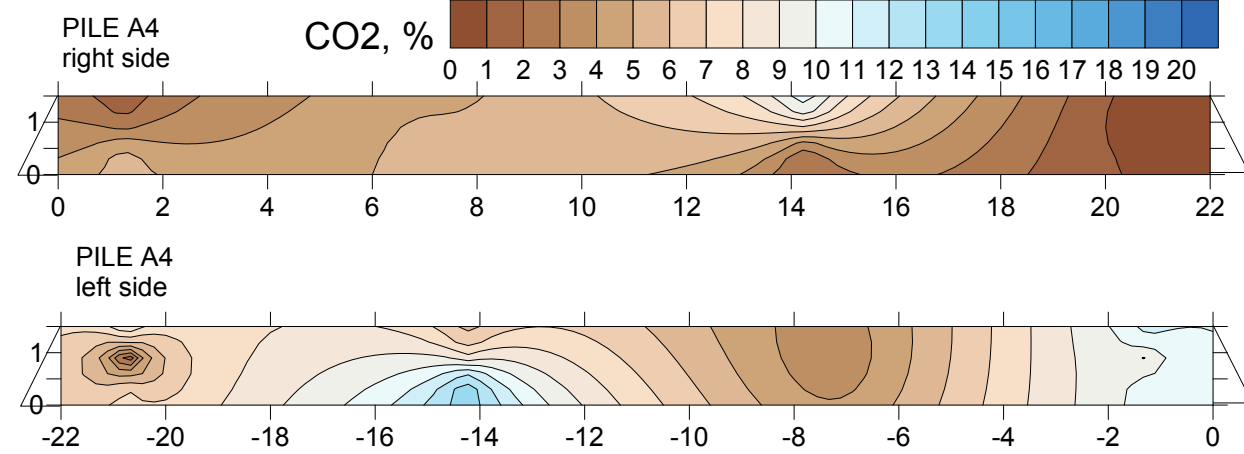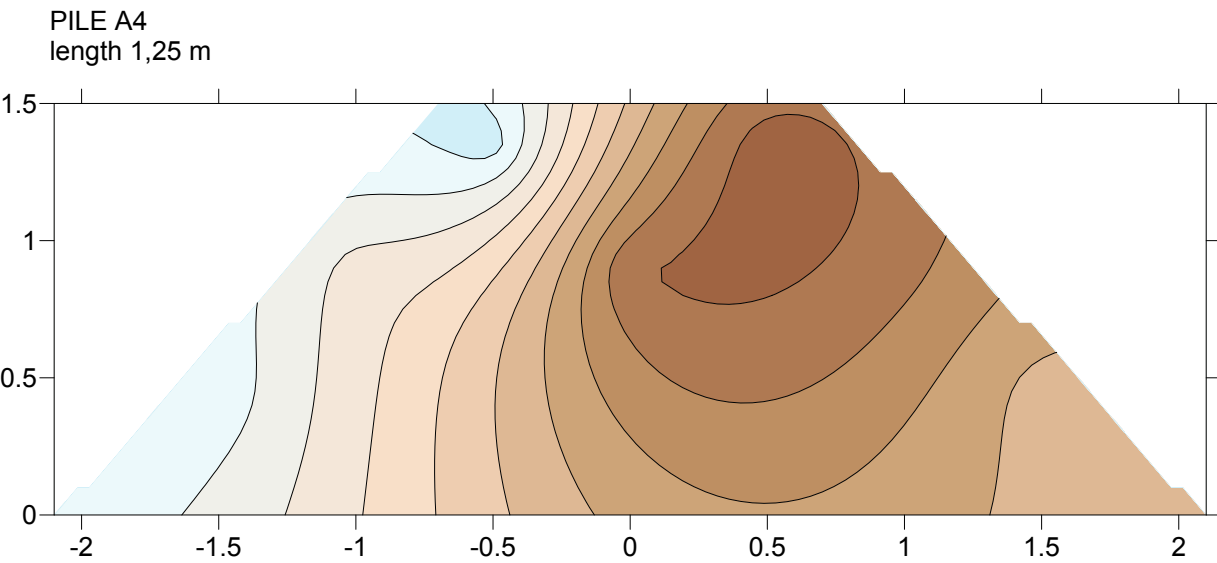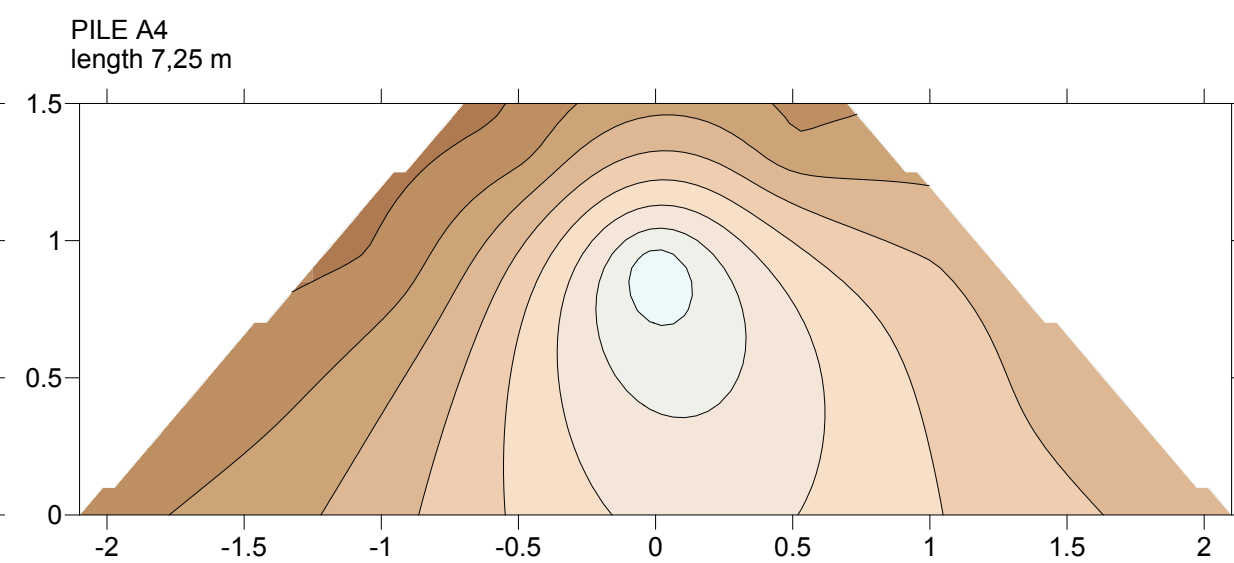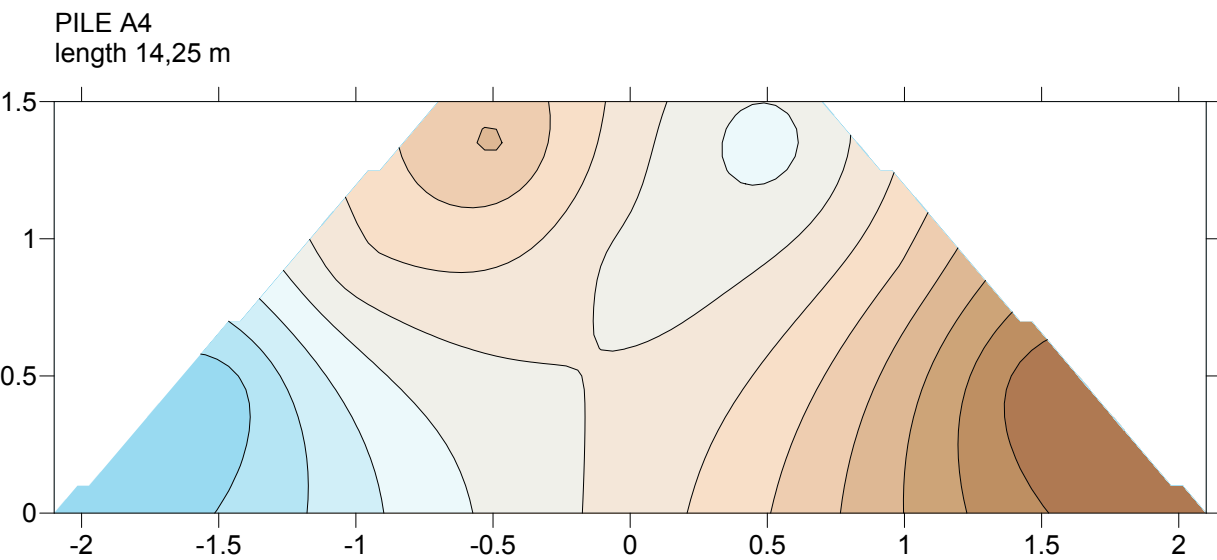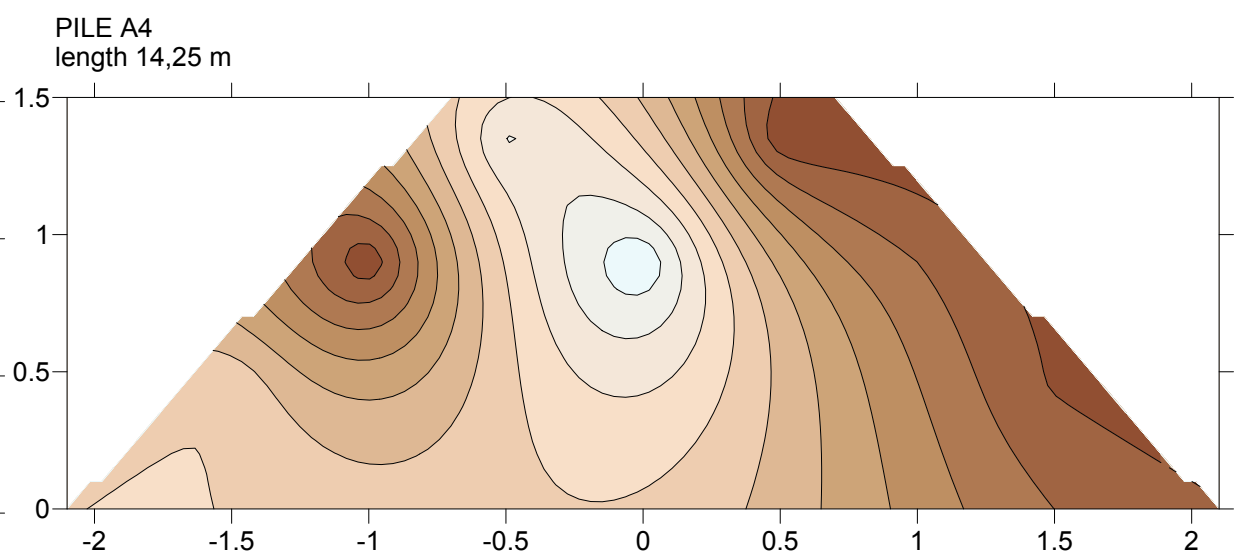

Supplement: s1 [file s1]

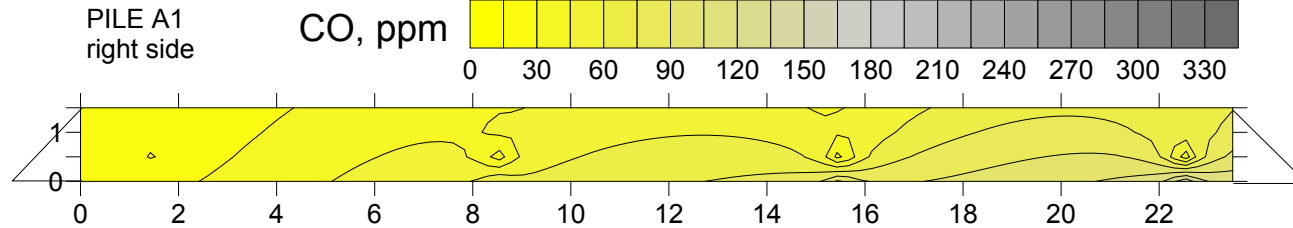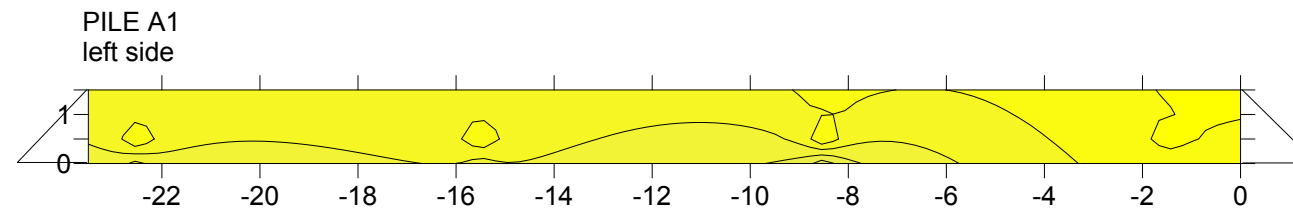

PILE A1  
length 1,5 m

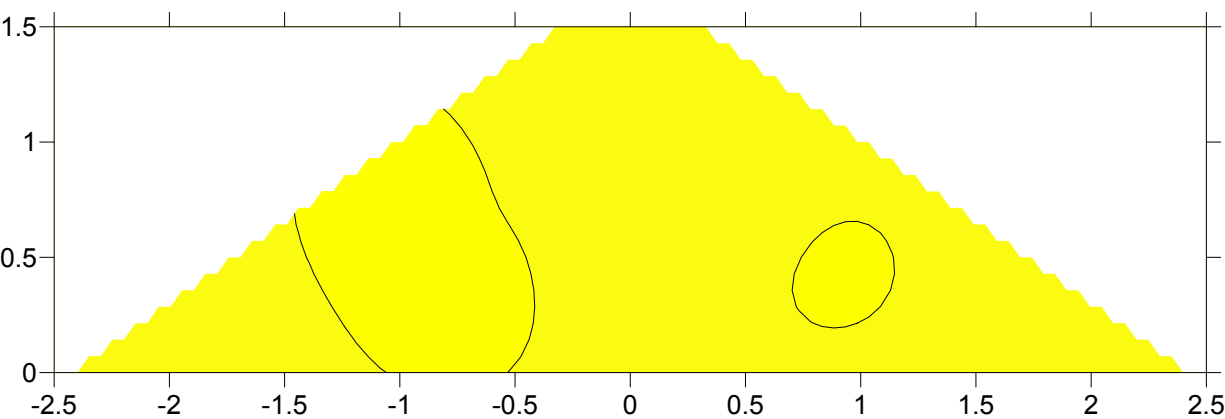

PILE A1  
length 15,5 m

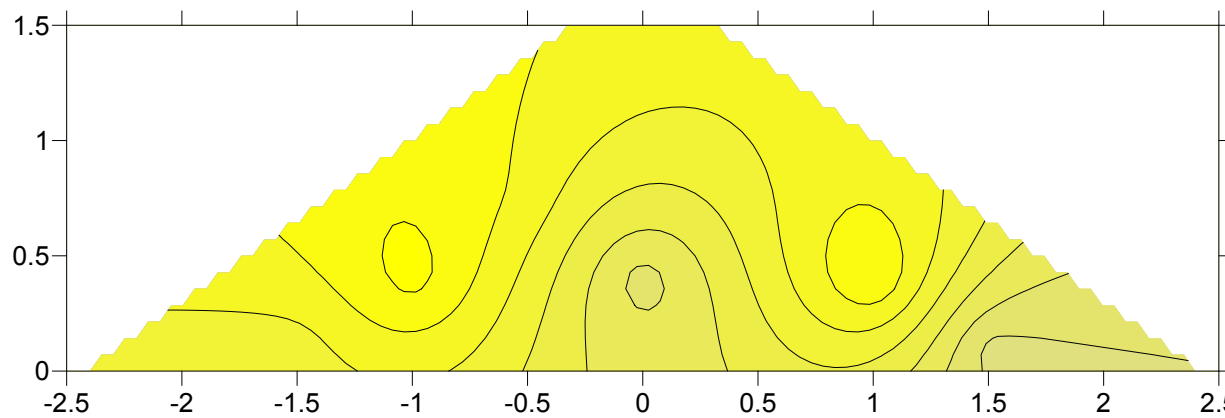

PILE A1  
length 8,5 m

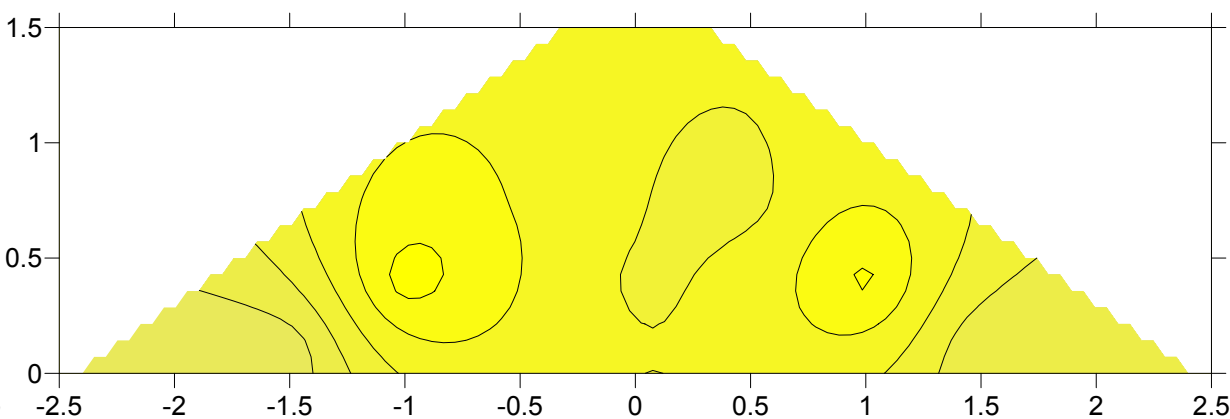

PILE A1  
length 22,5 m

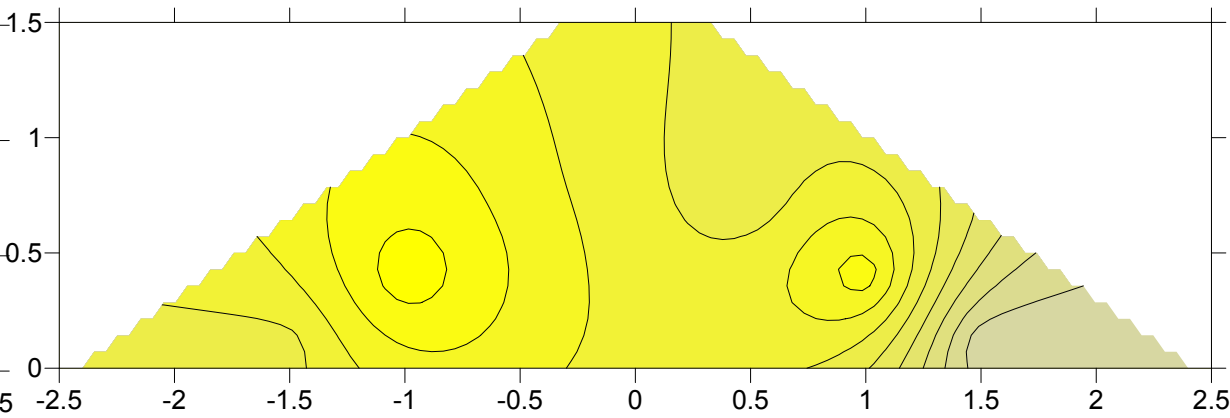

Supplement: s1 [file s1]

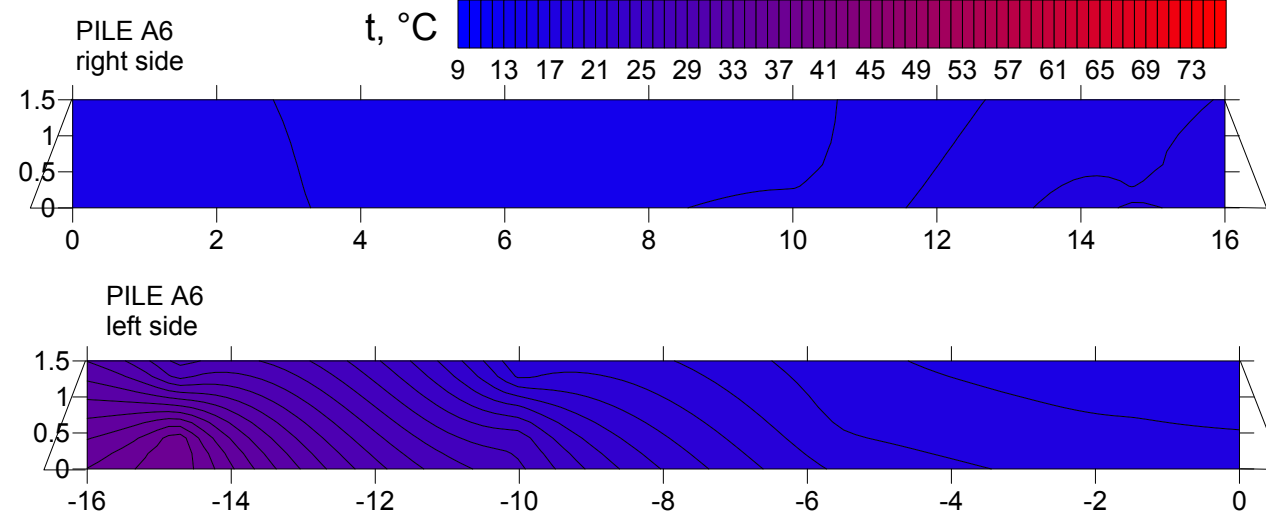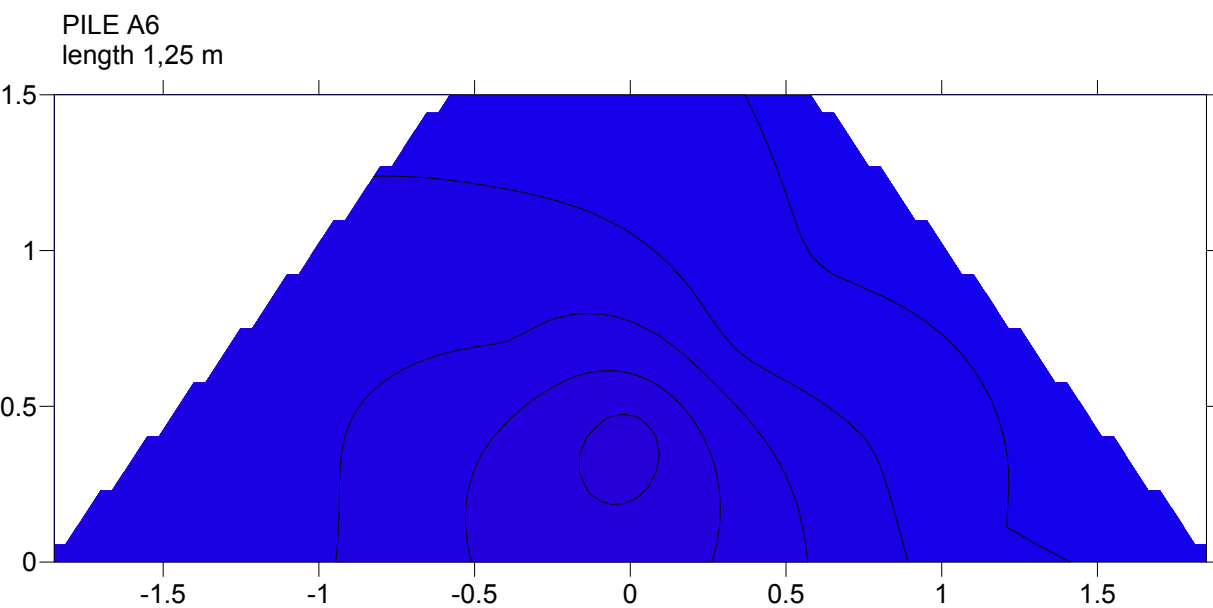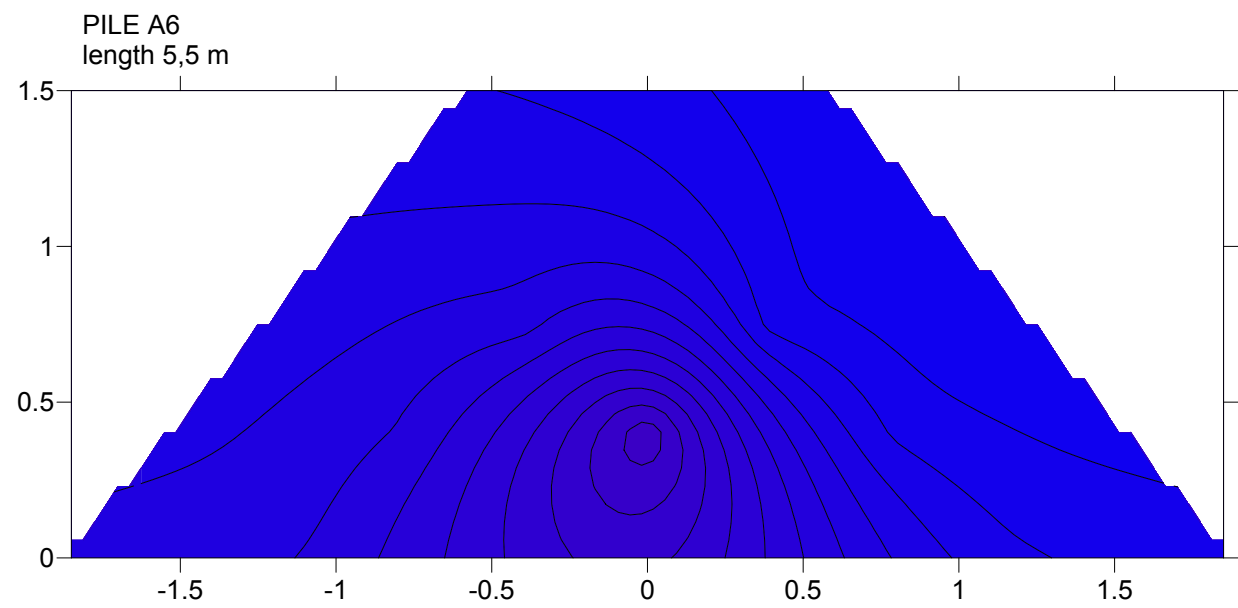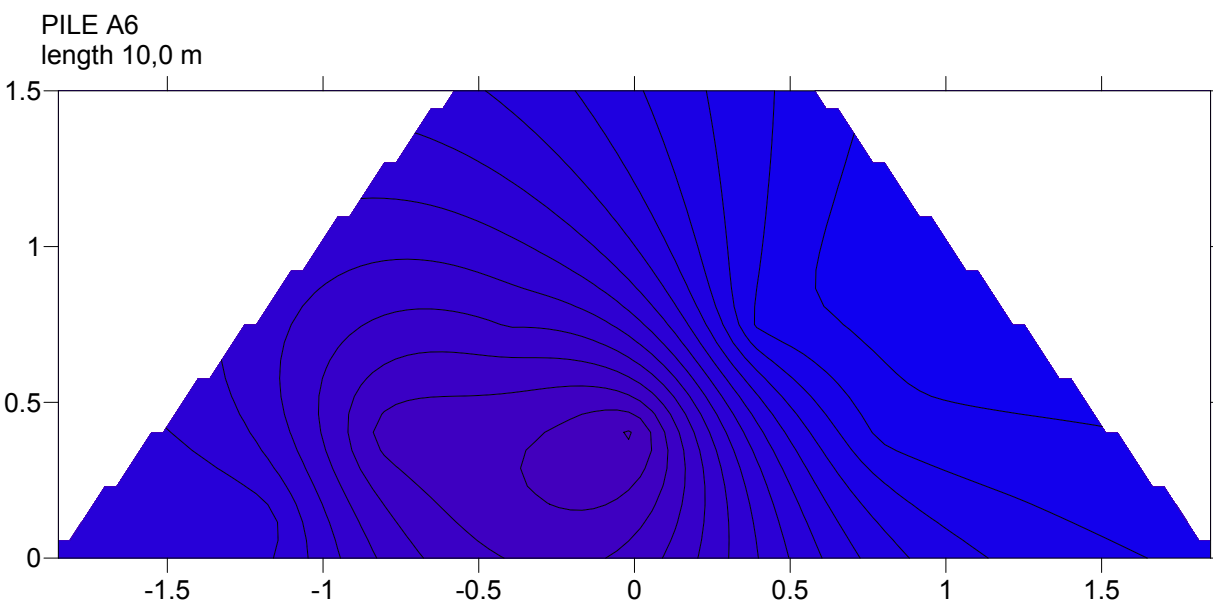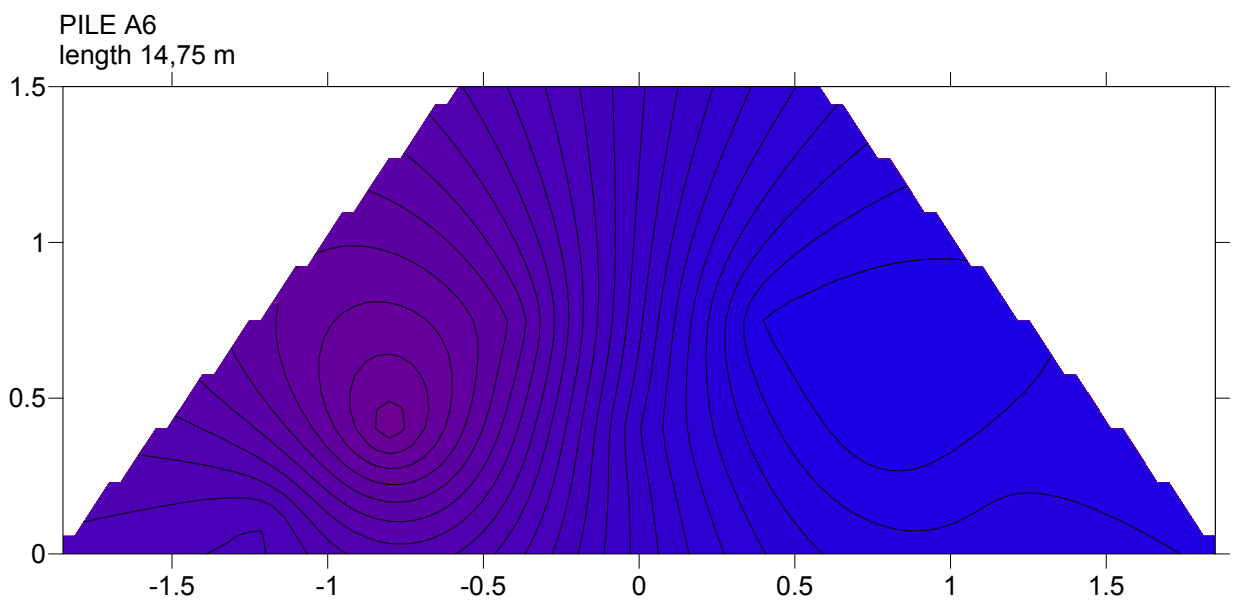

Supplement: s1 [file s1]

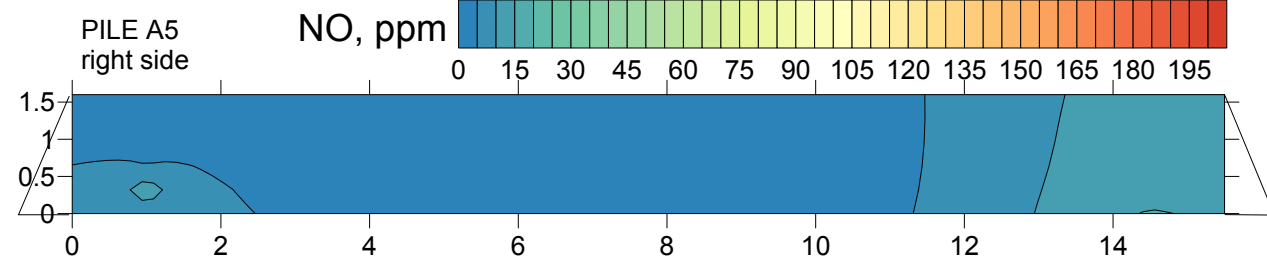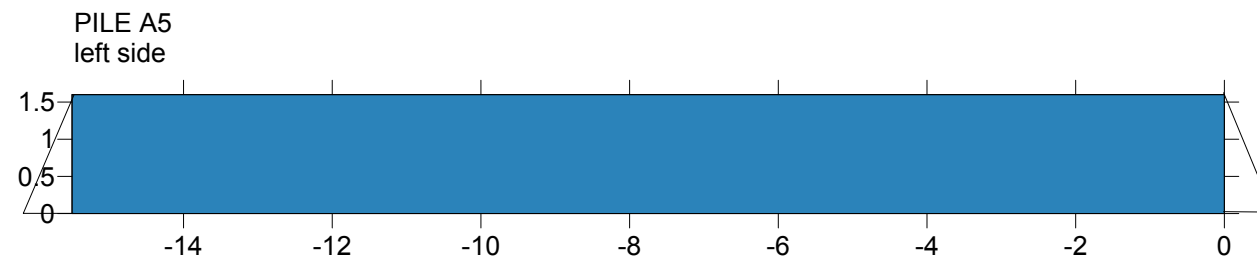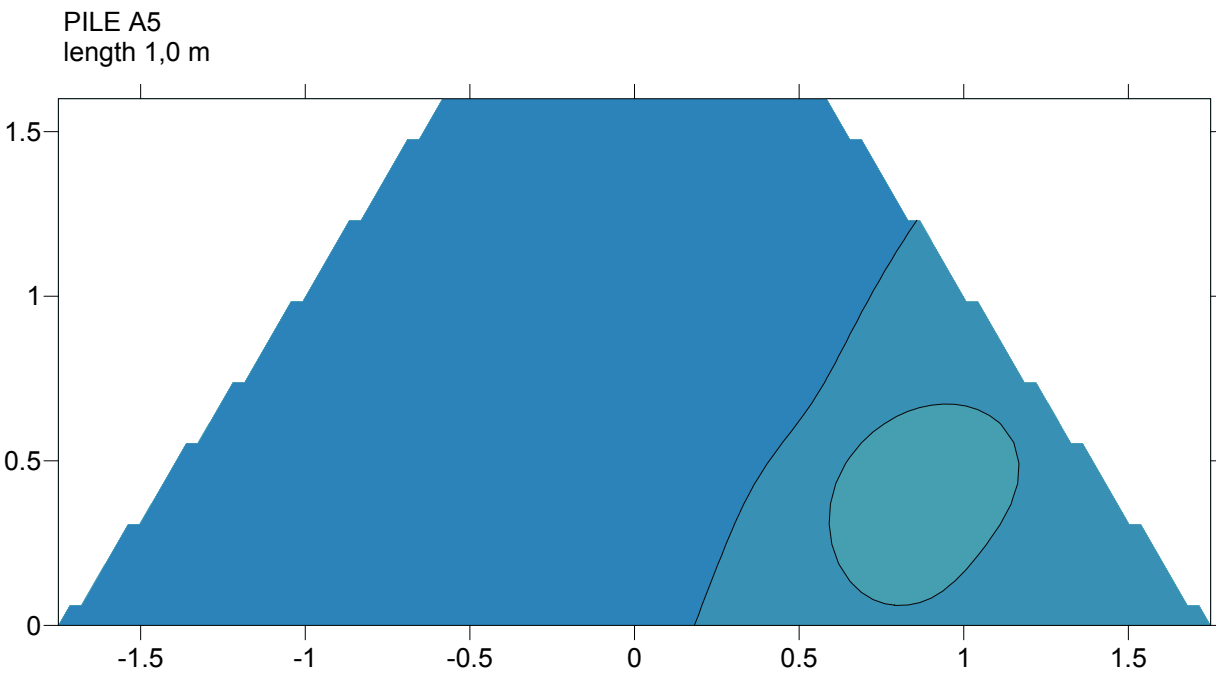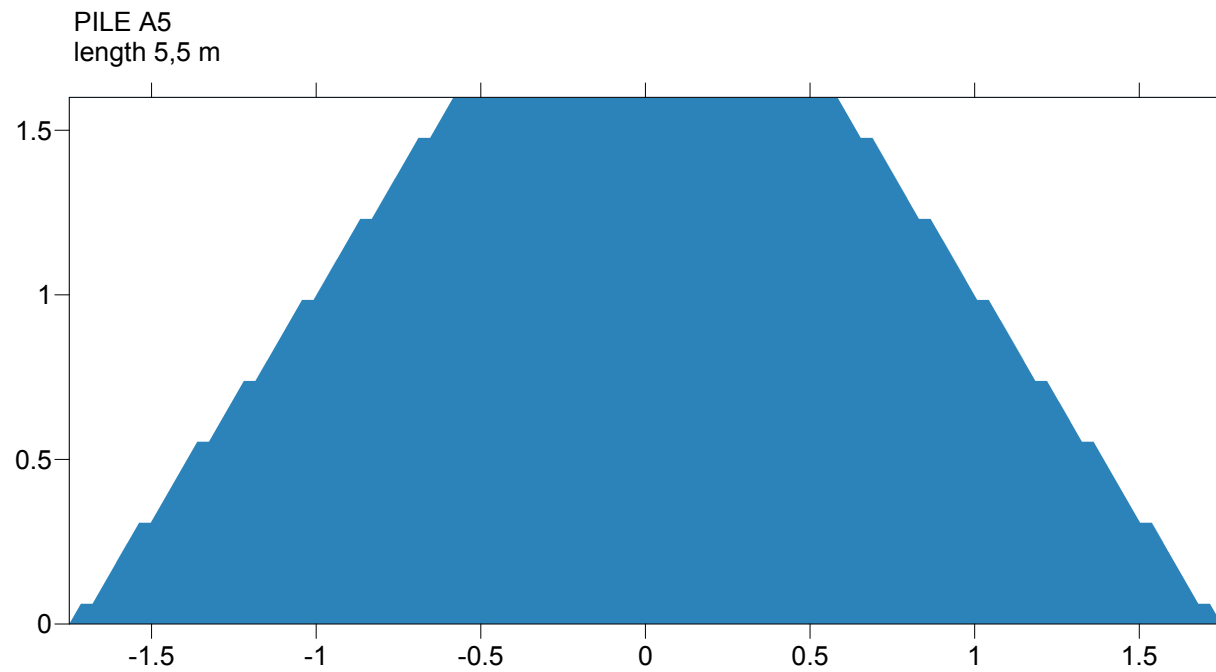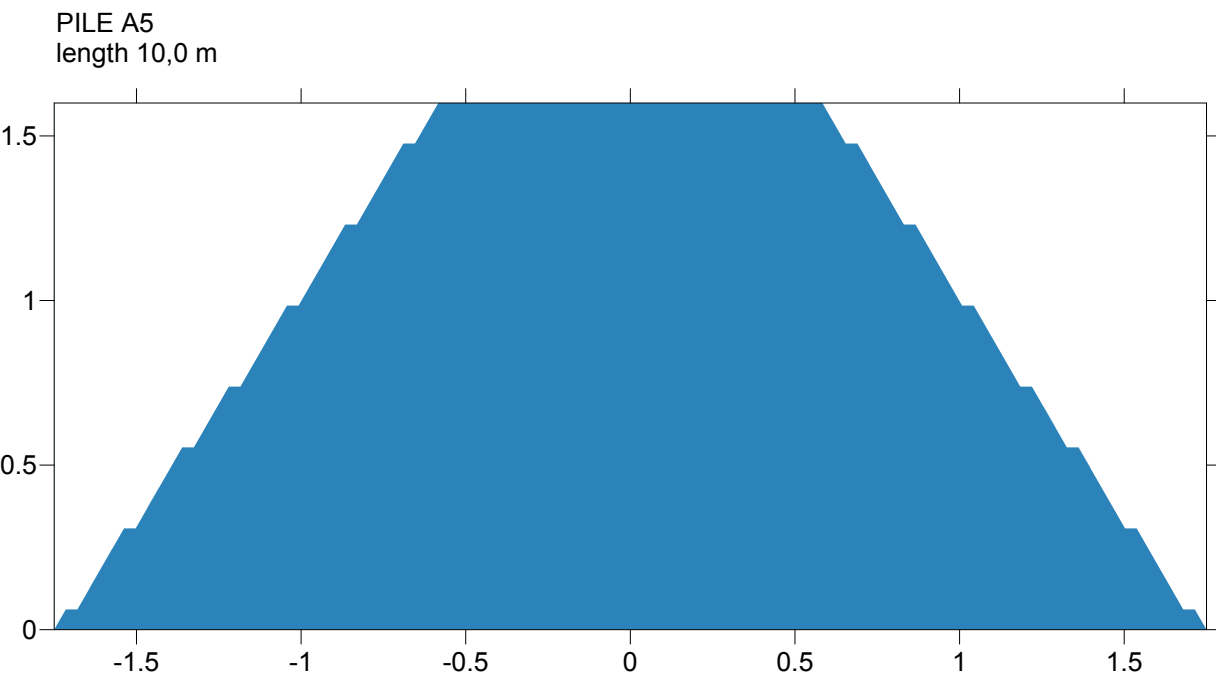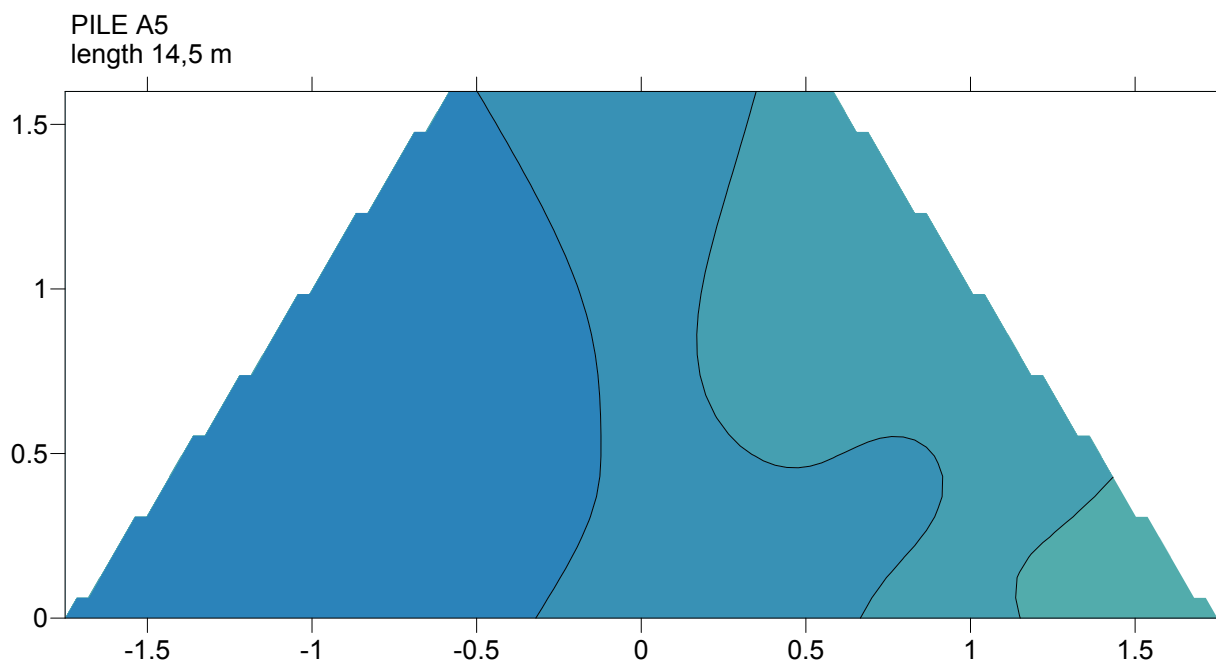

Supplement: s1 [file s1]

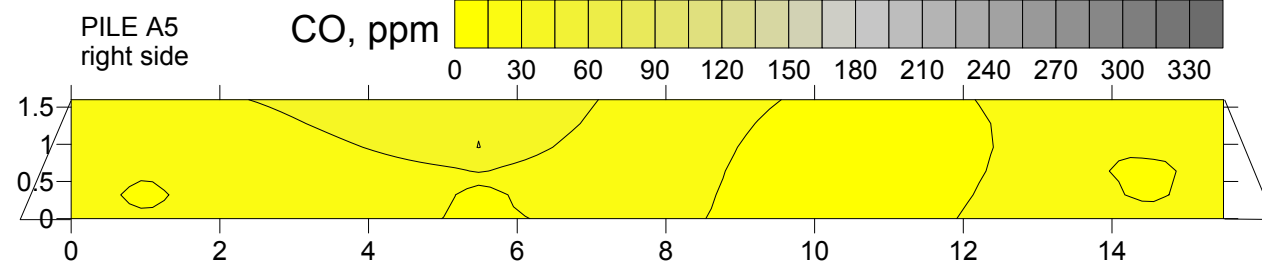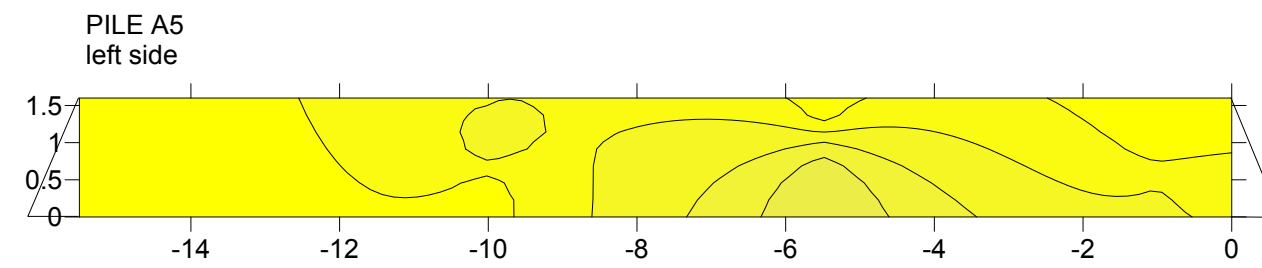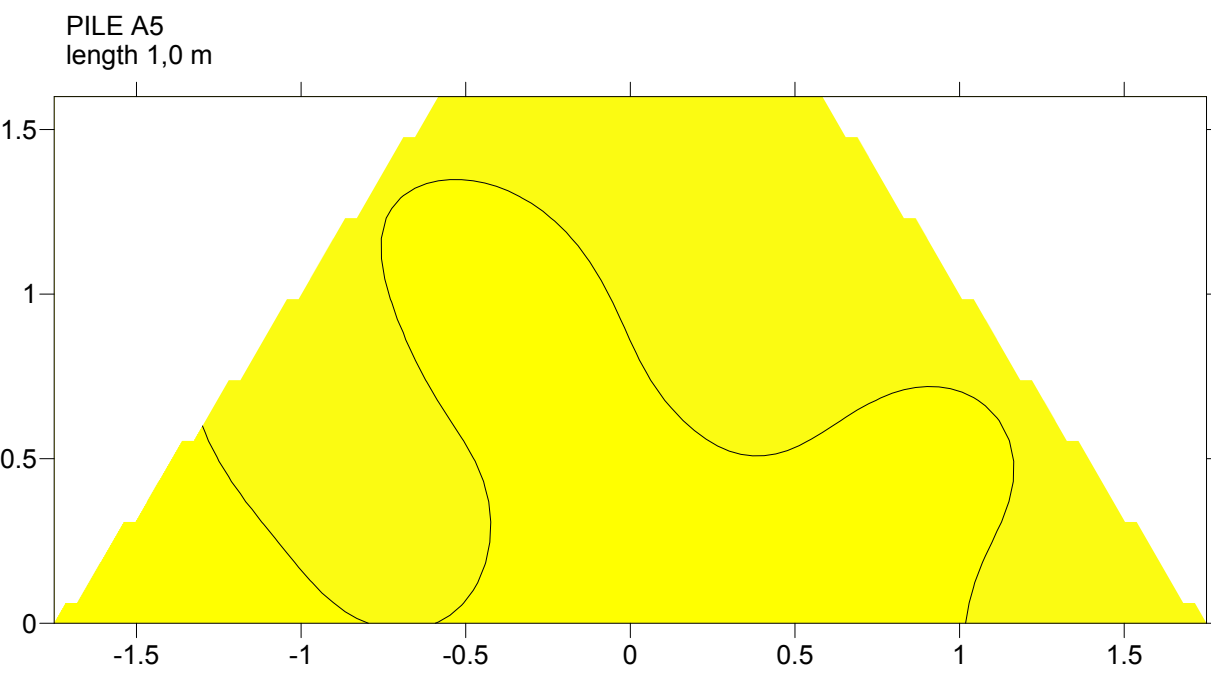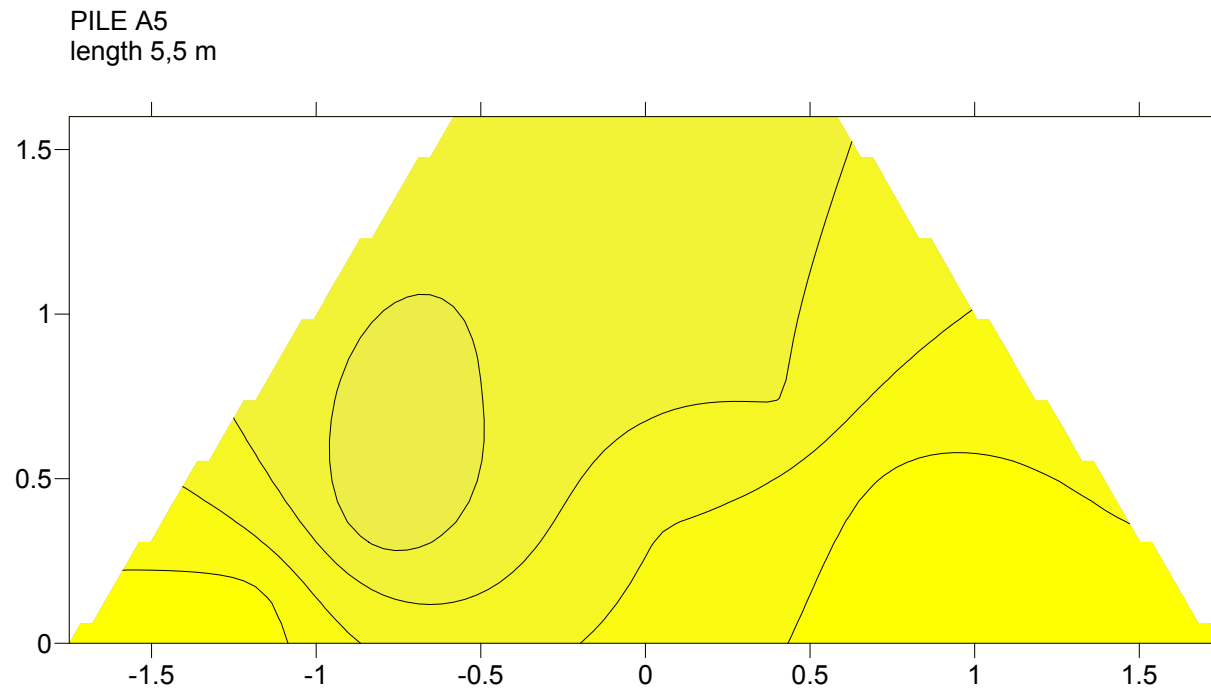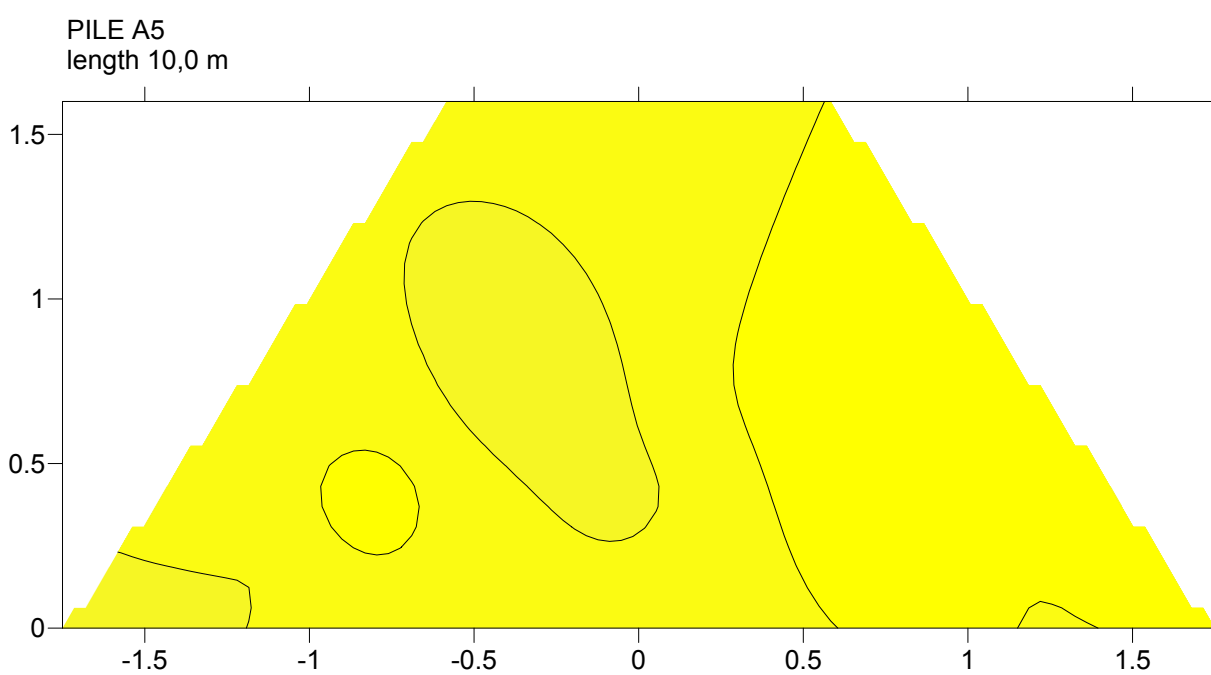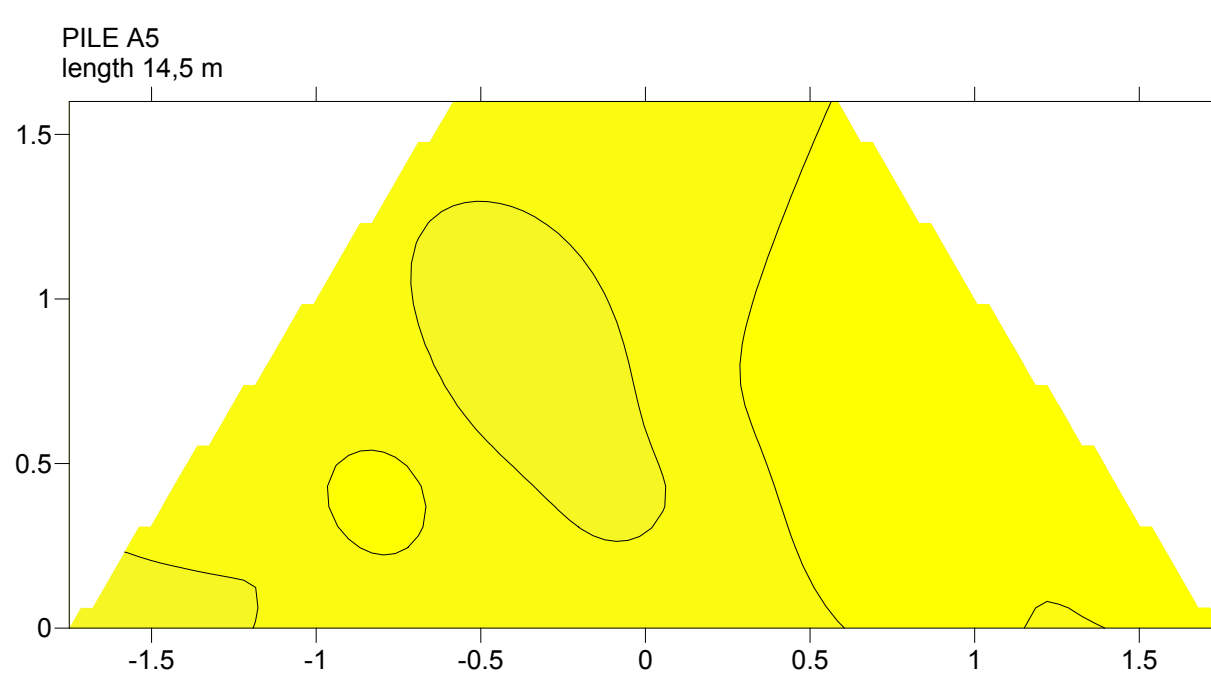

Supplement: s1 [file s1]

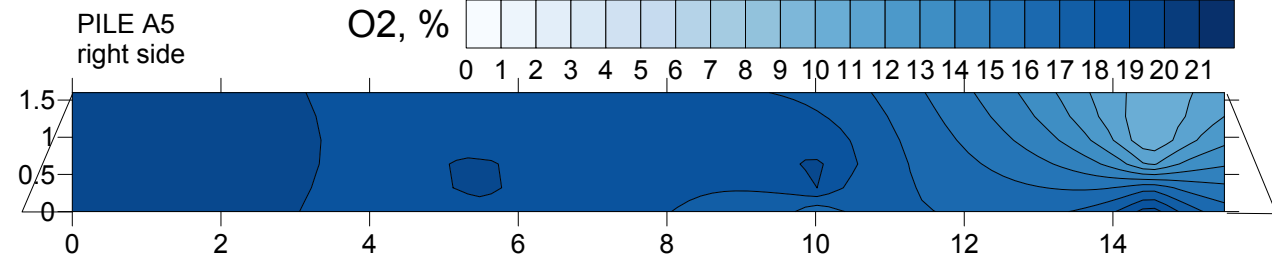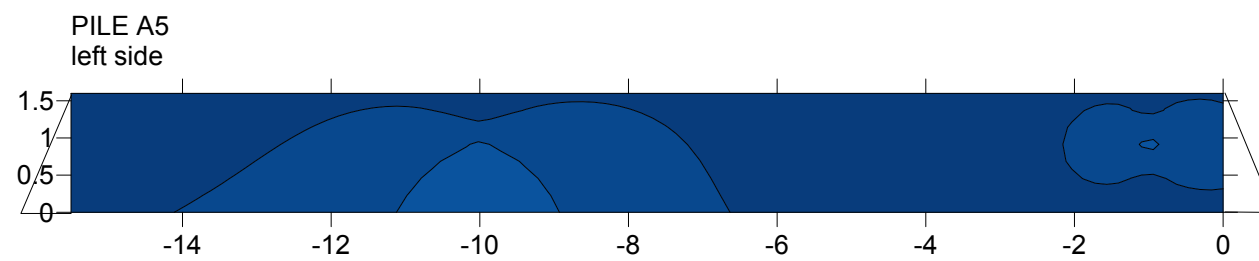

PILE A5  
length 1,0 m

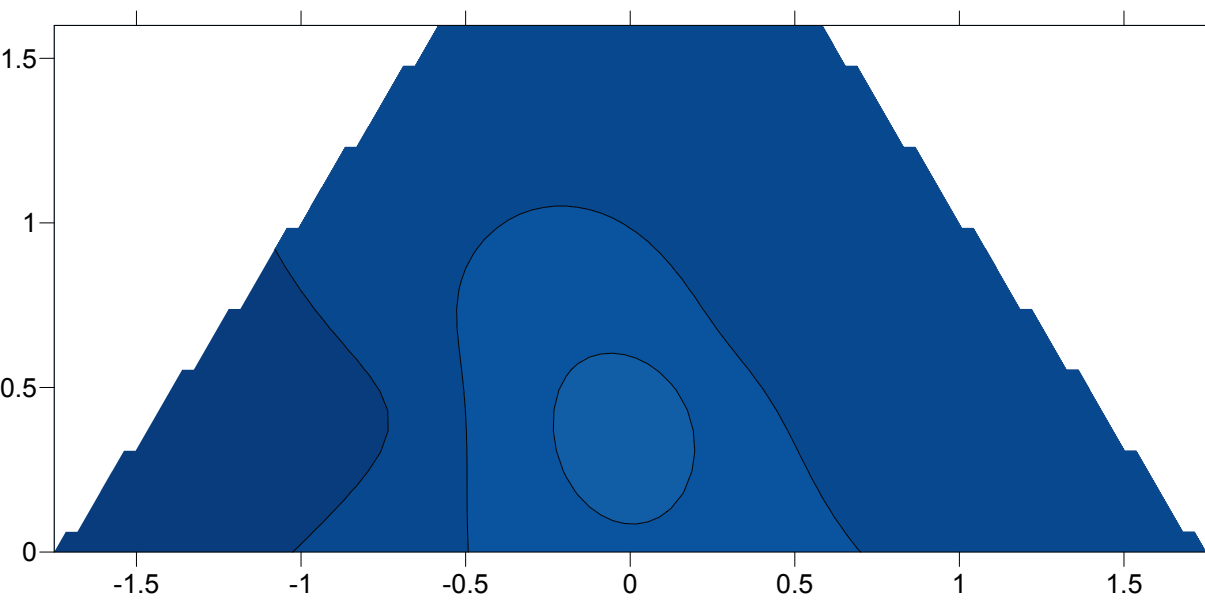

PILE A5  
length 5,5 m

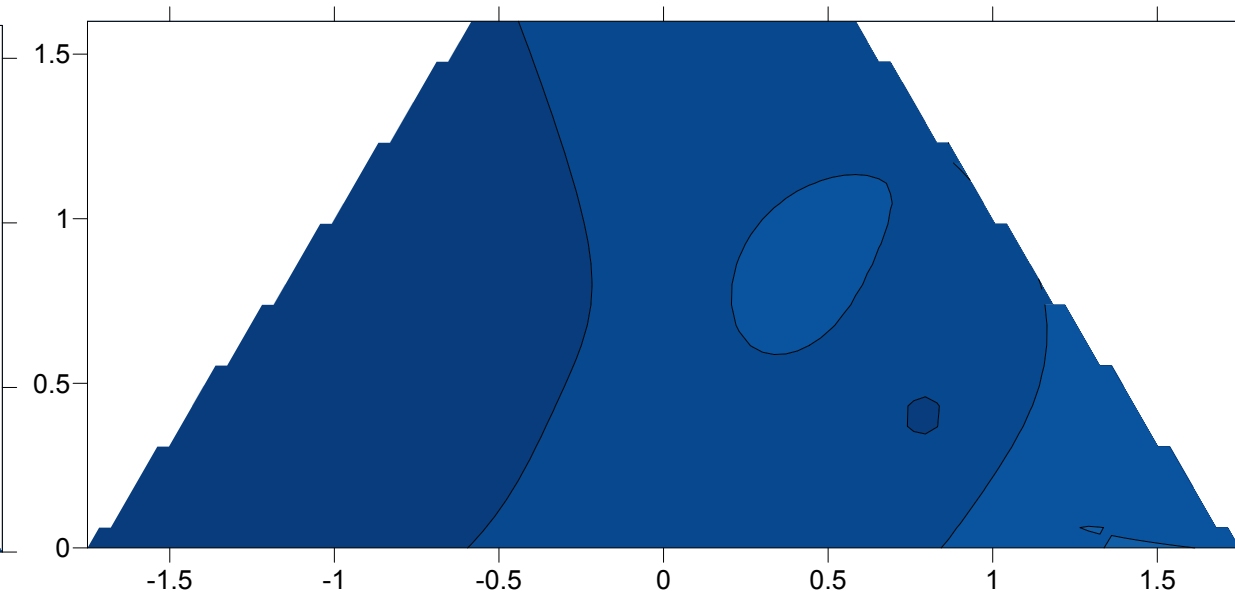

PILE A5  
length 10,0 m

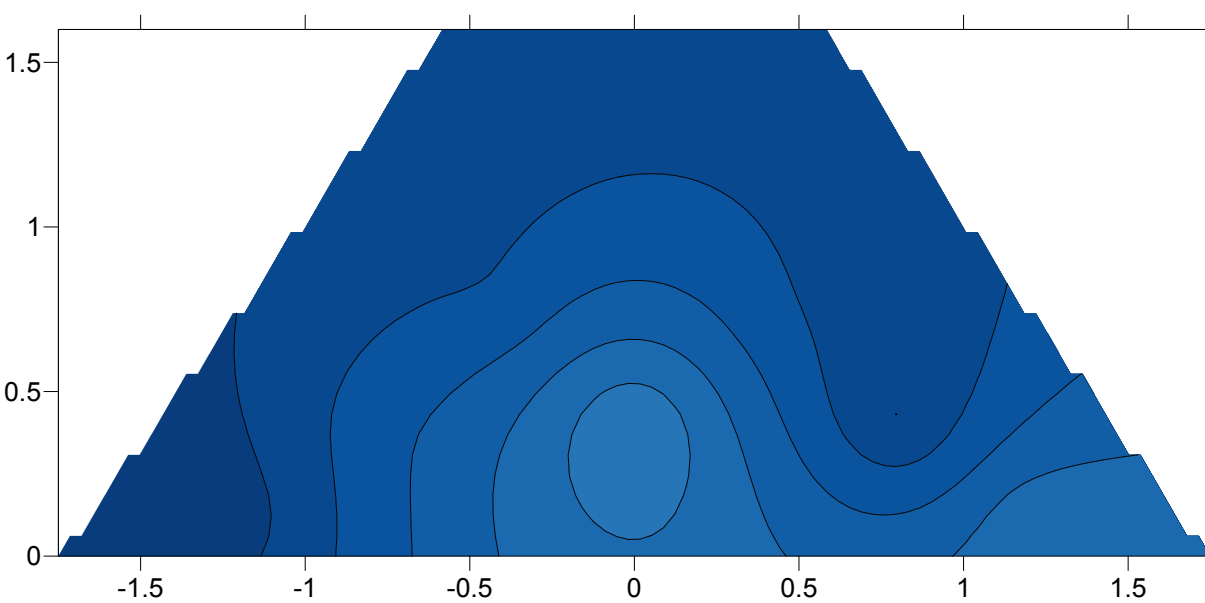

PILE A5  
length 14,5 m

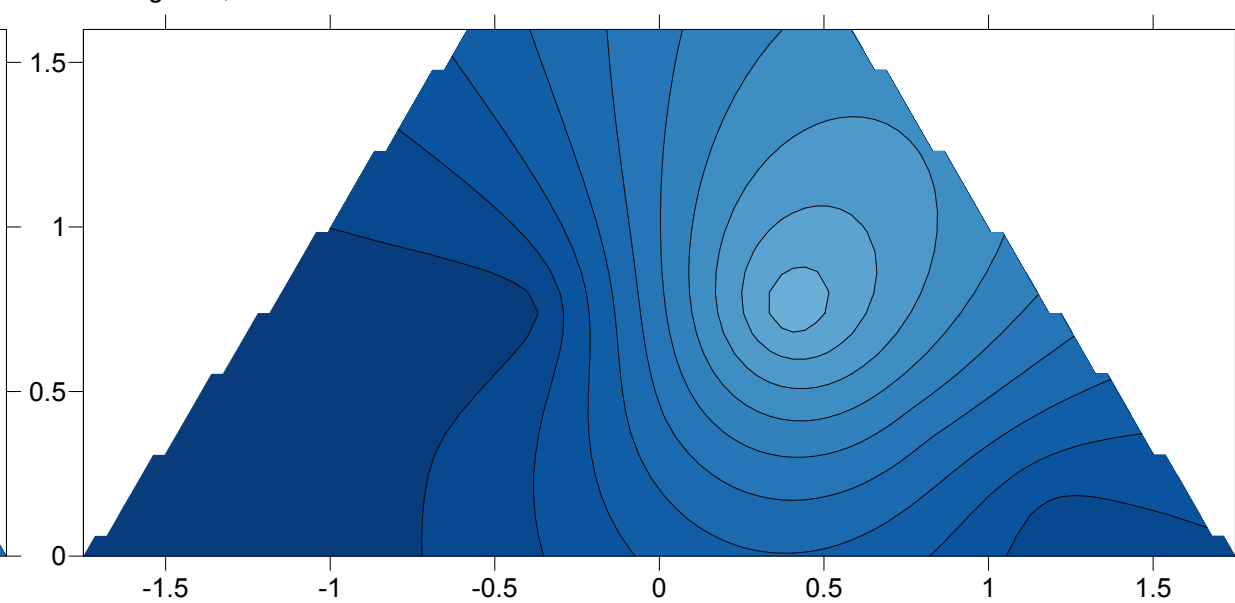

Supplement: s1 [file s1]

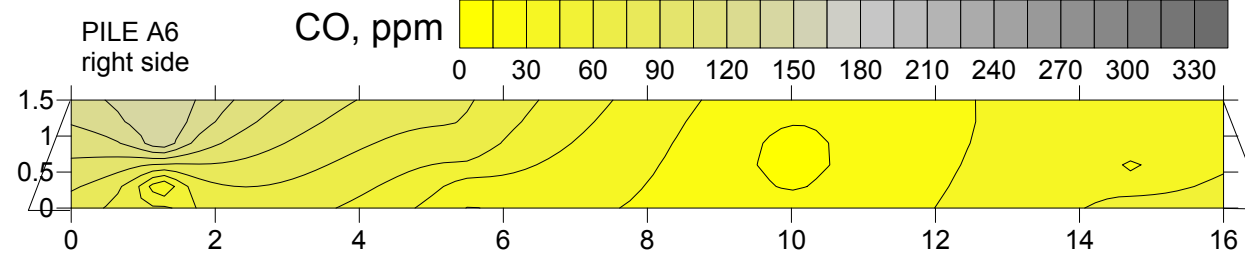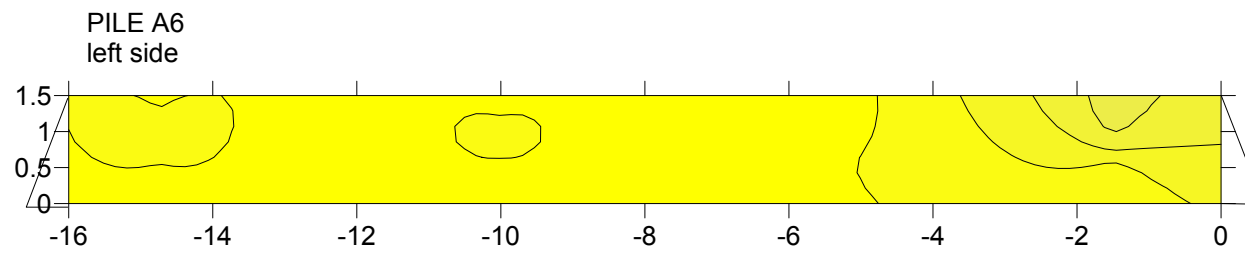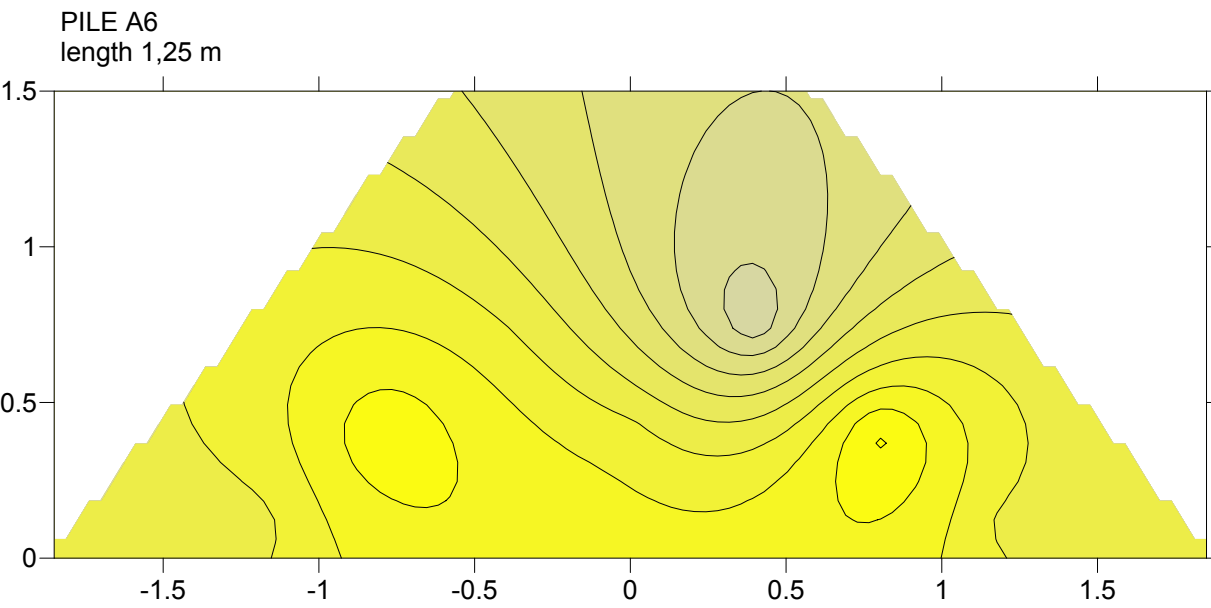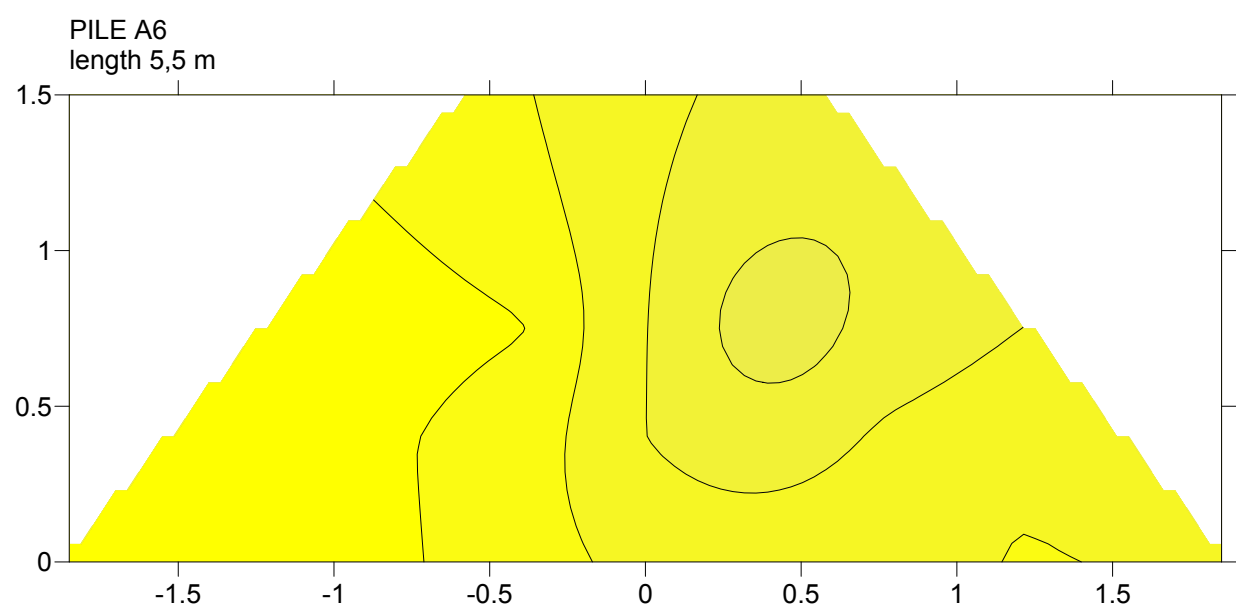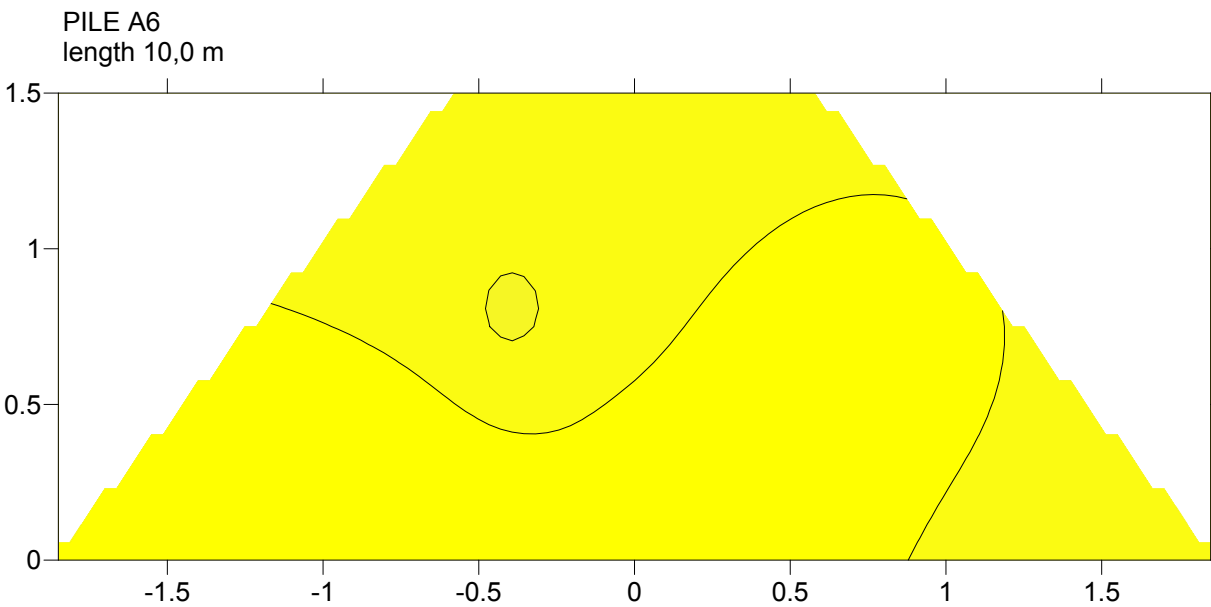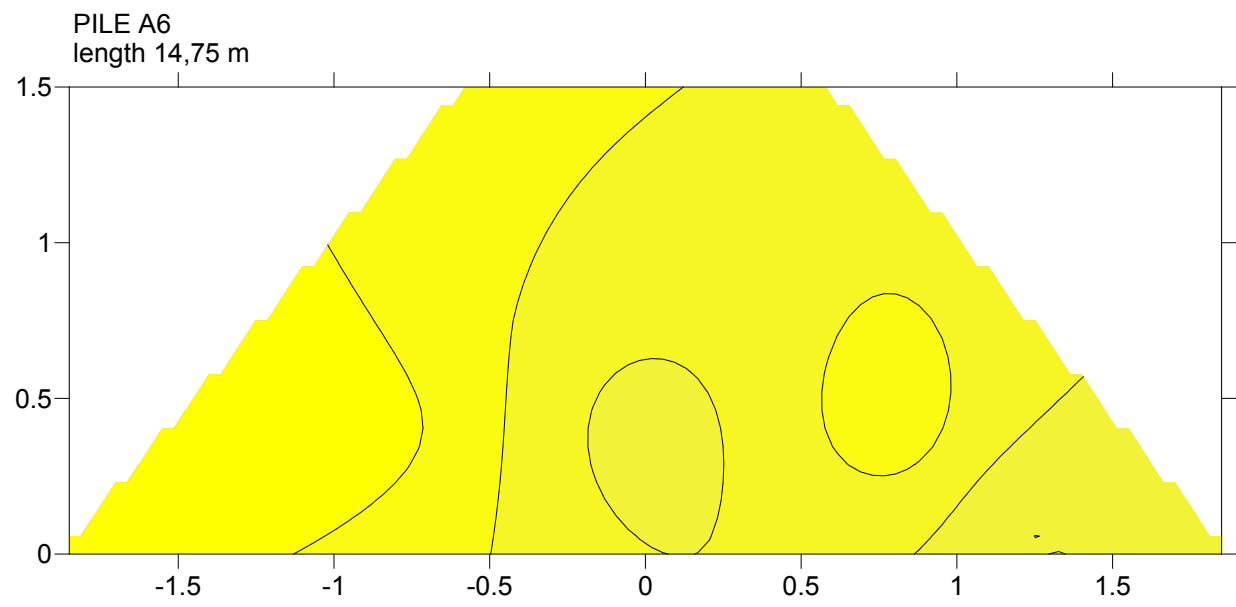

Supplement: s1 [file s1]

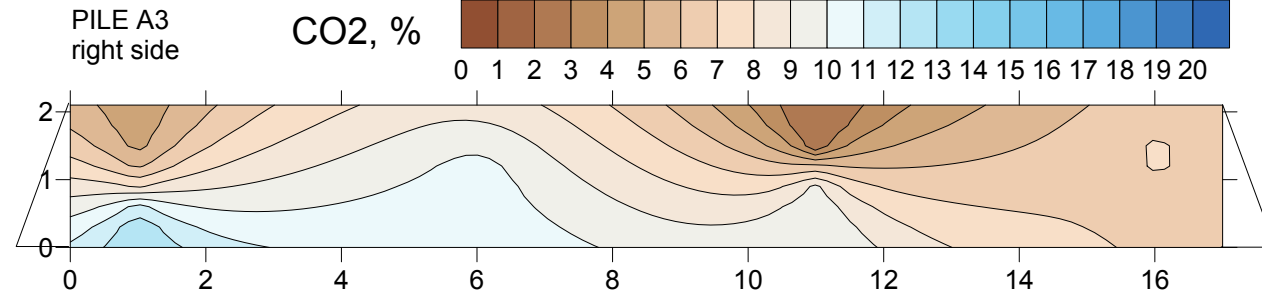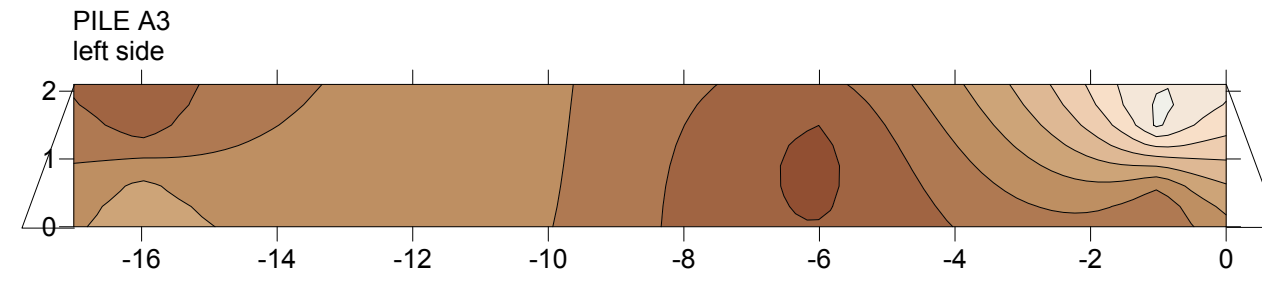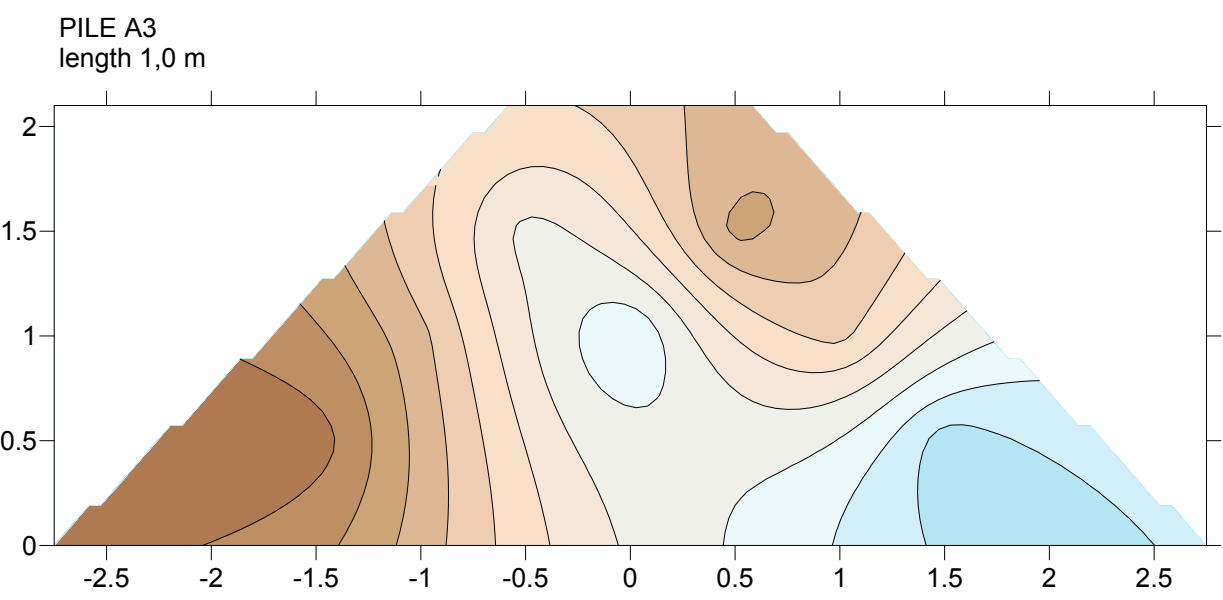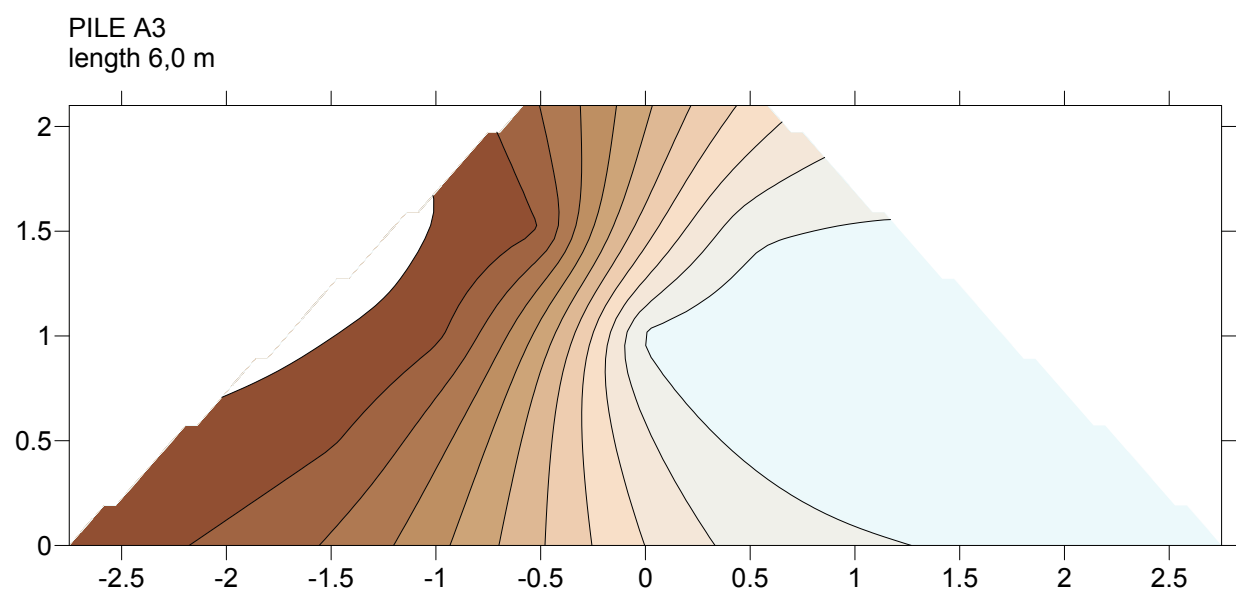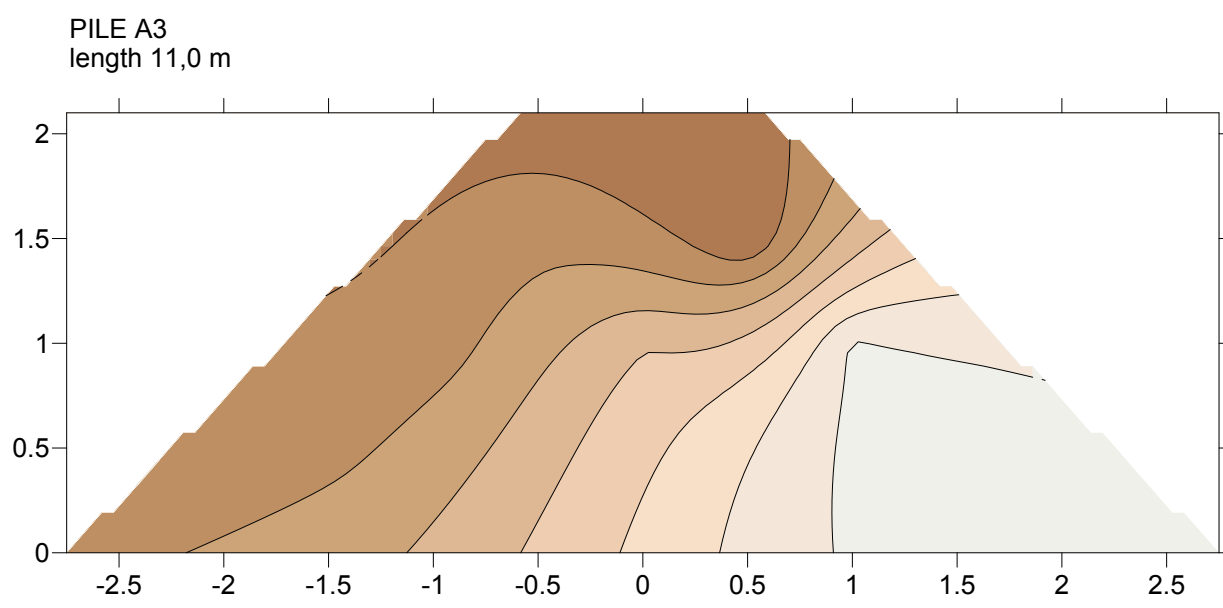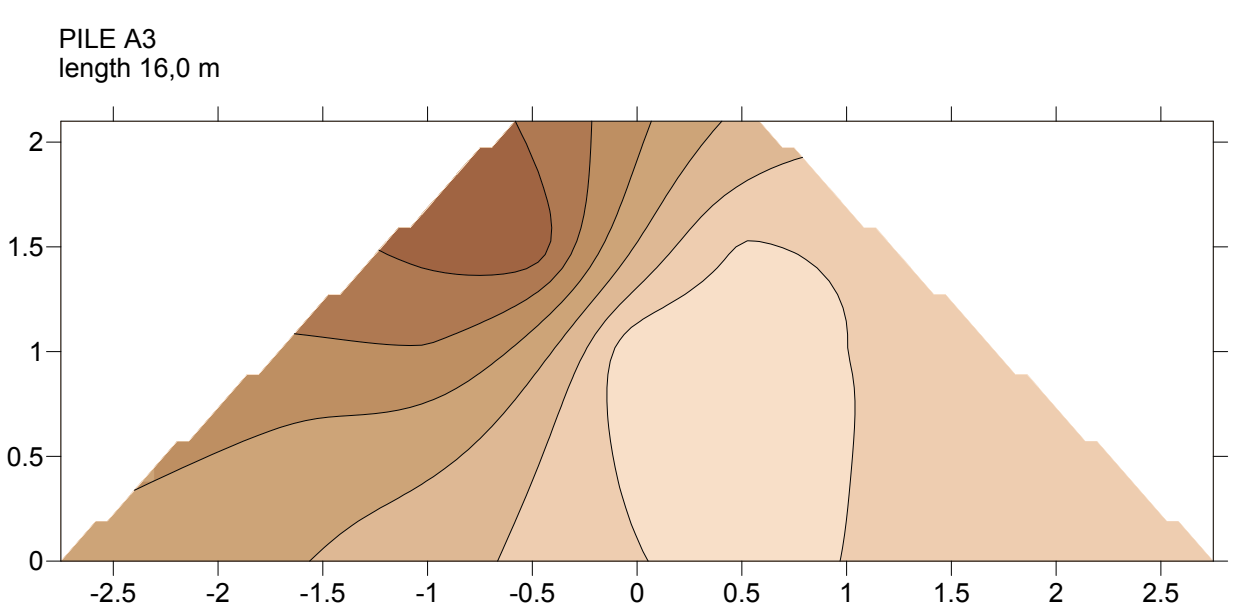

Supplement: s1 [file s1]

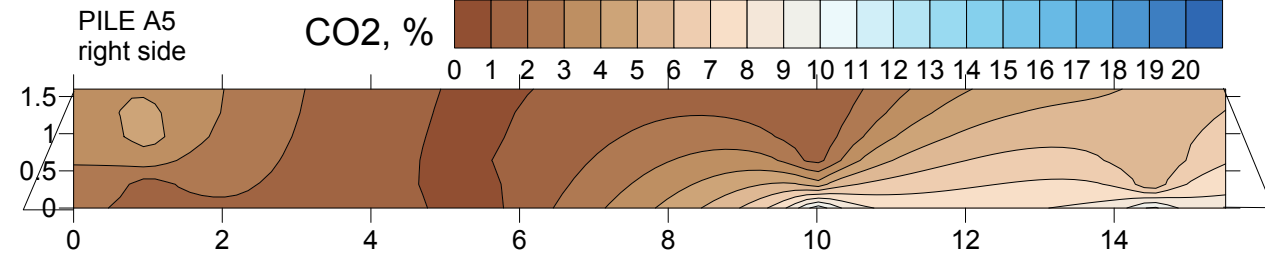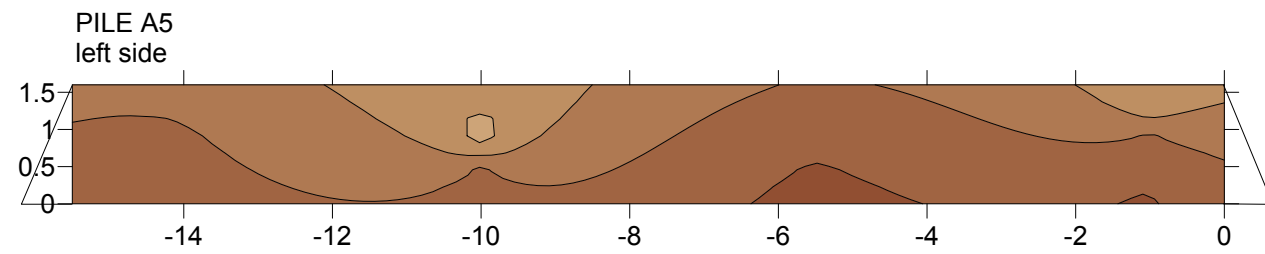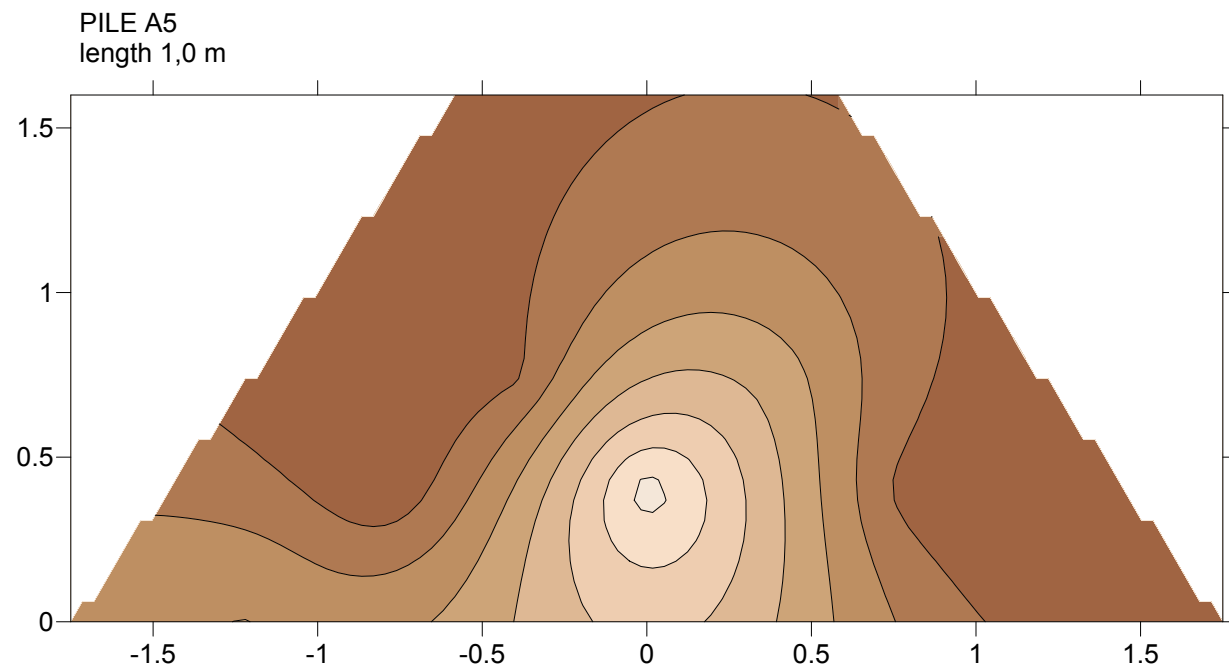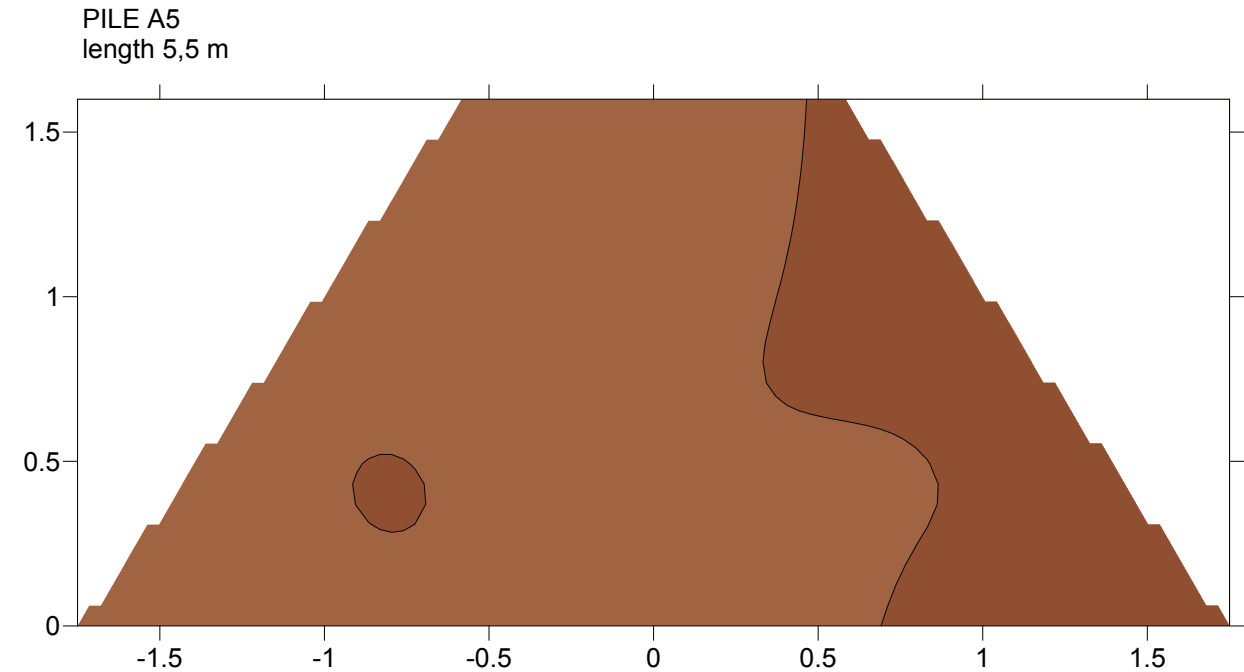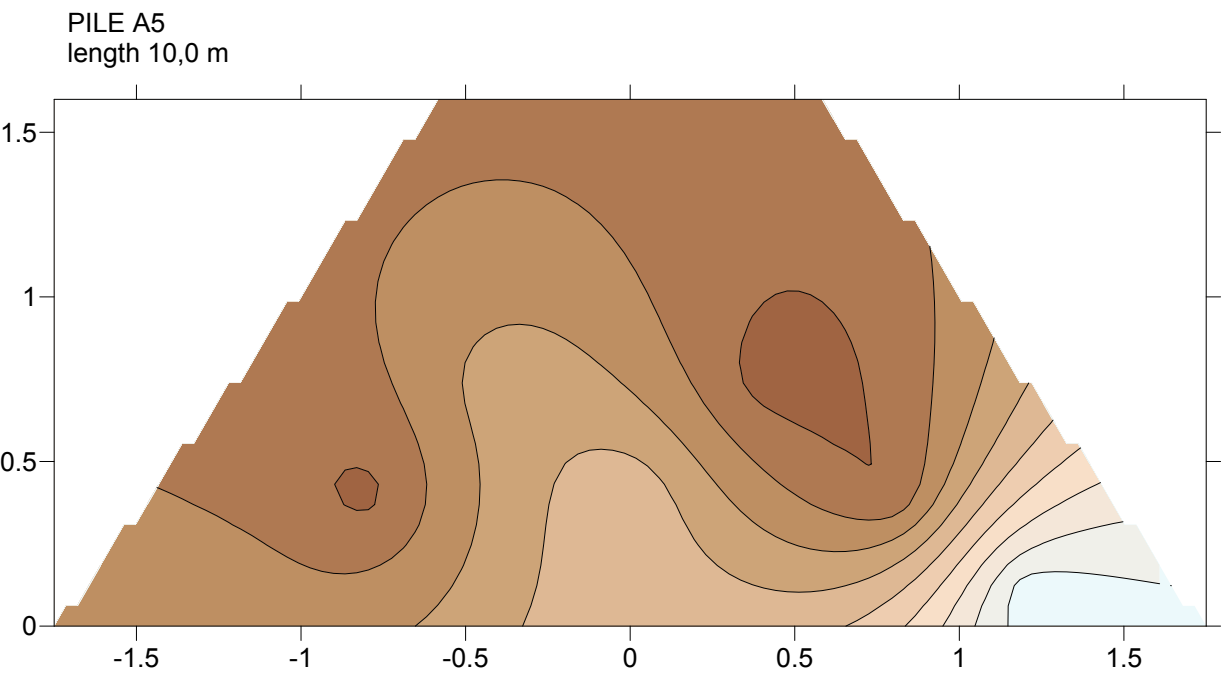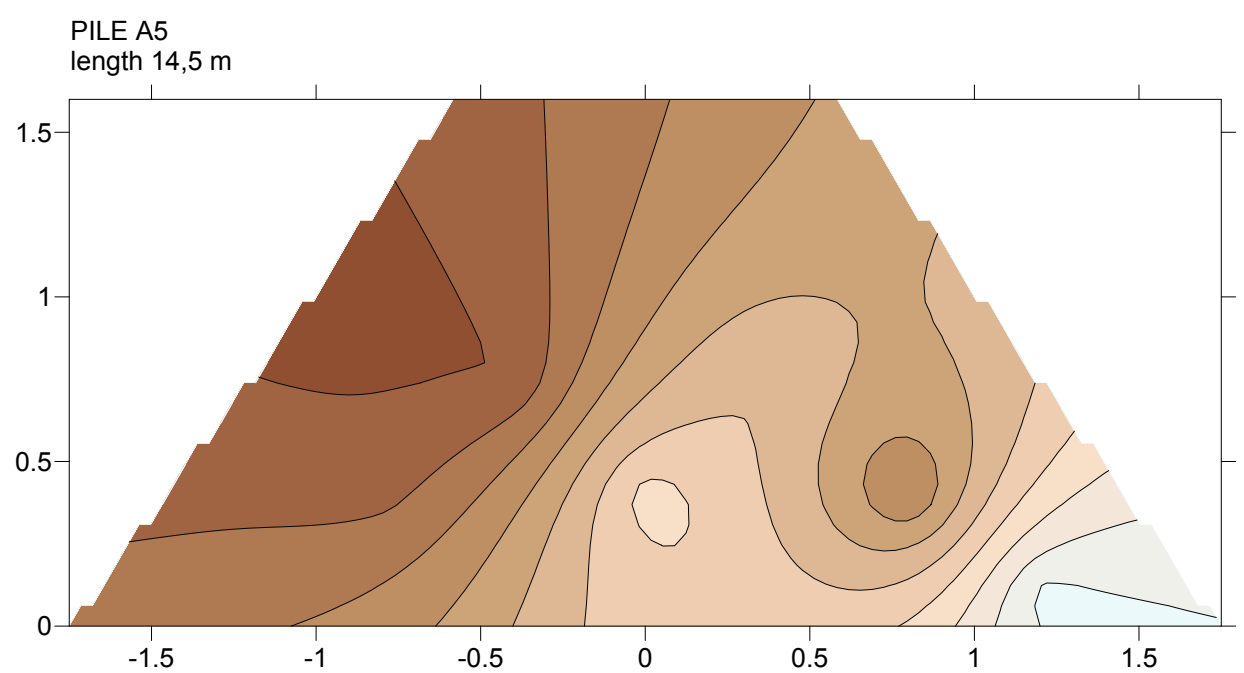

Supplement: s1 [file s1]

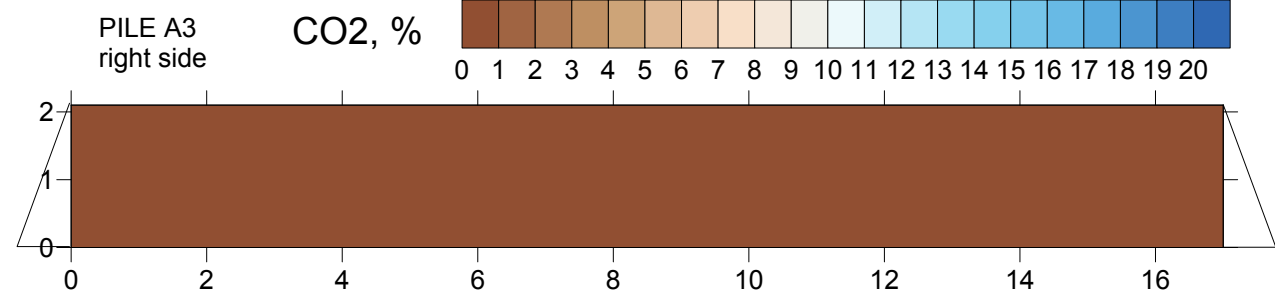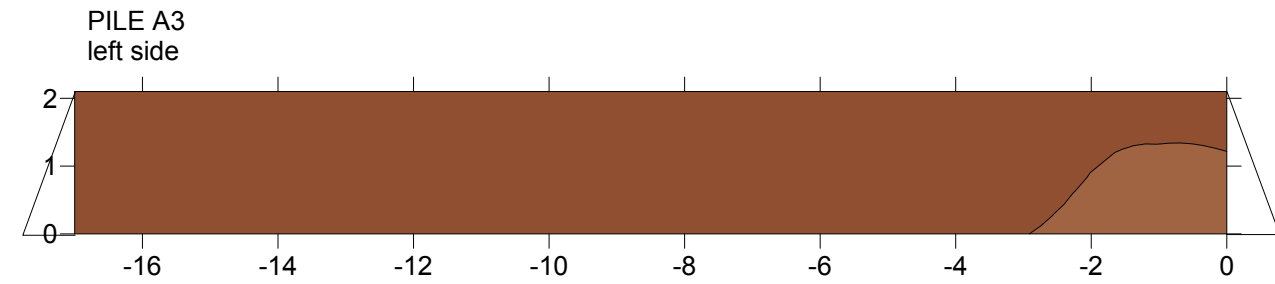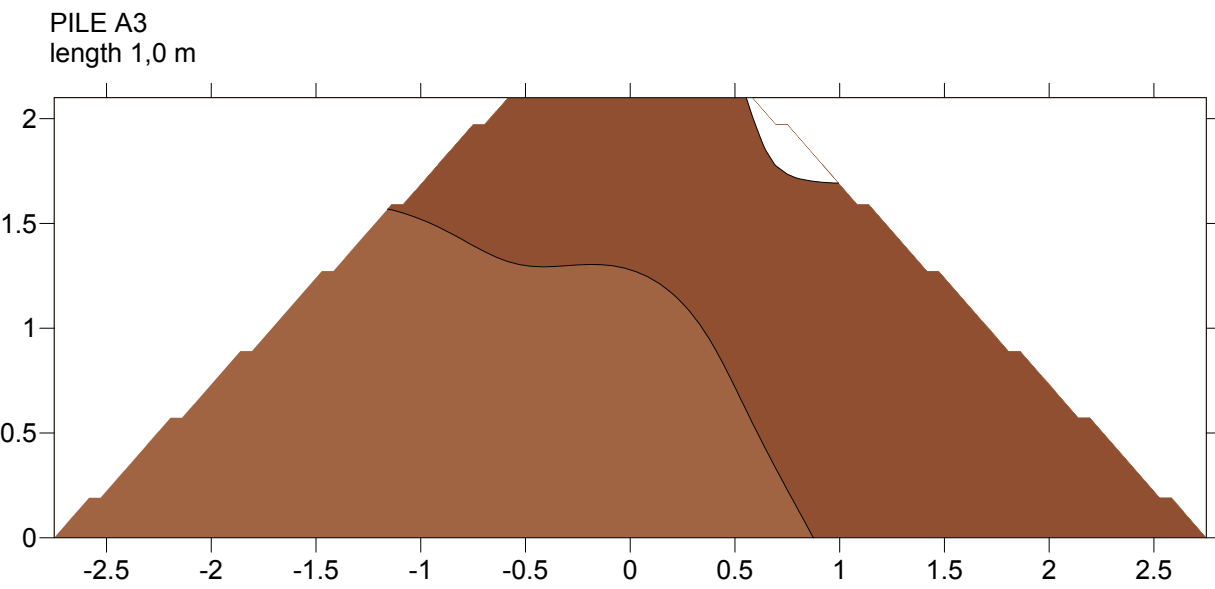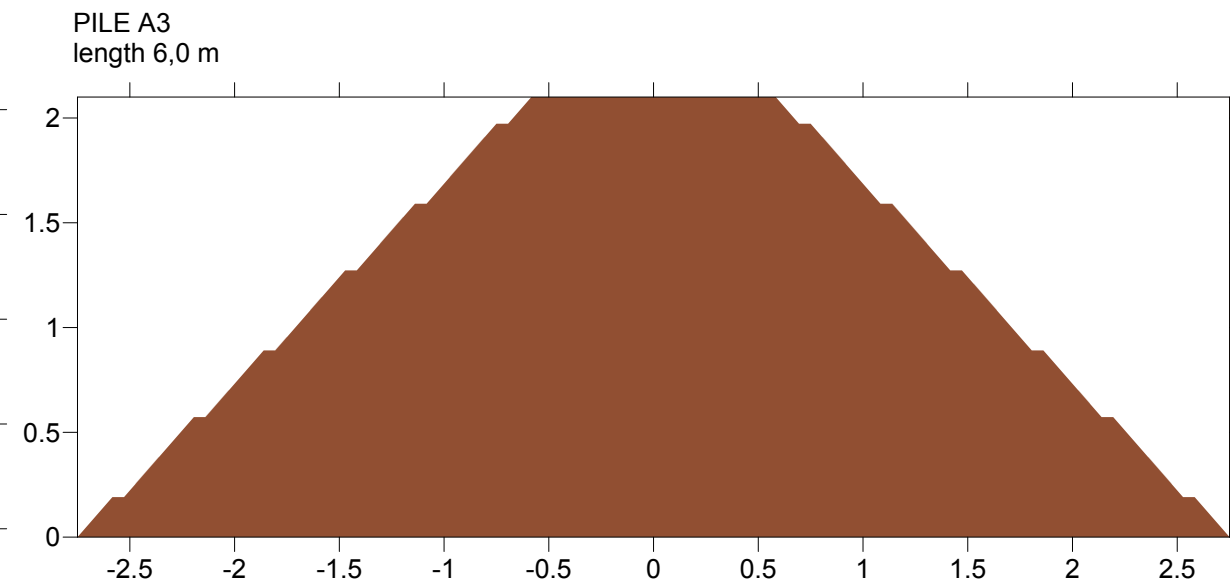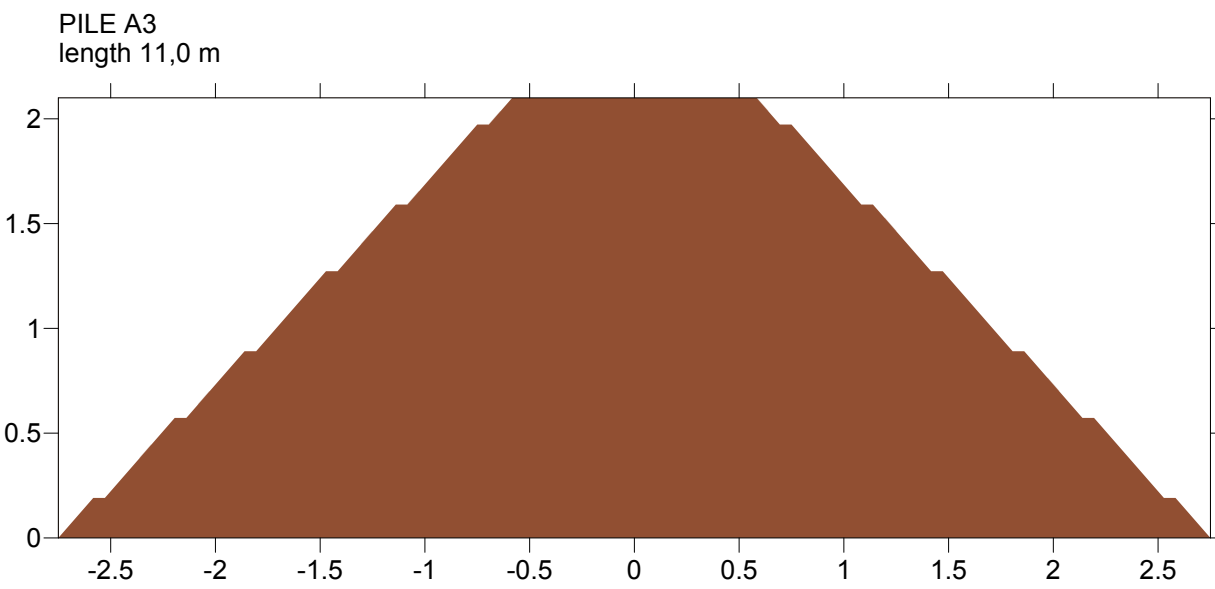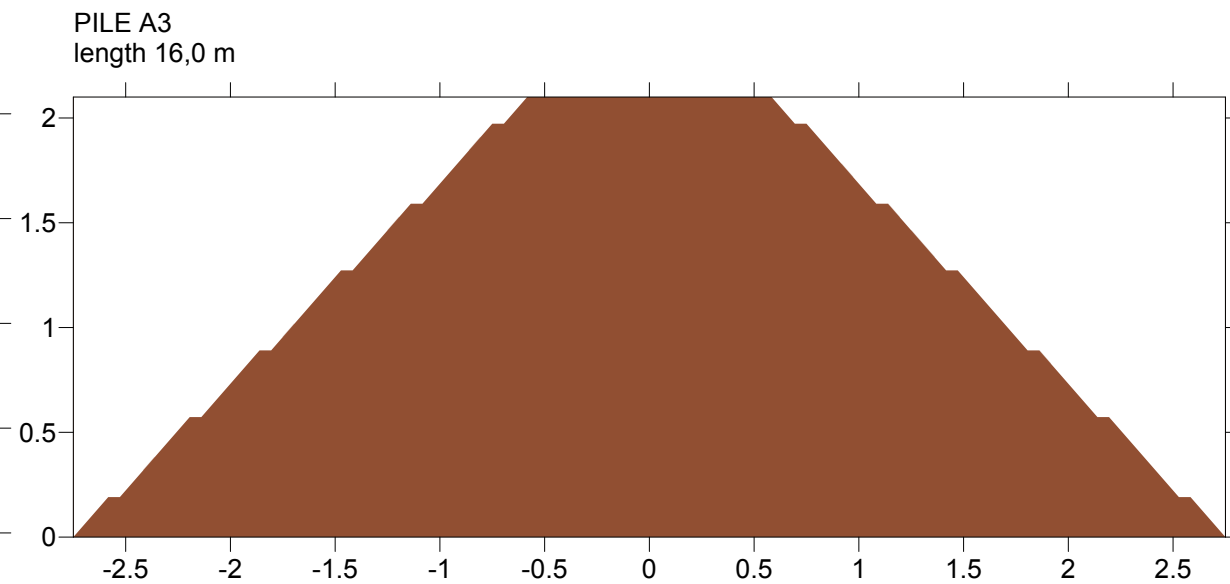

Supplement: s1 [file s1]

PILE A2  
right side

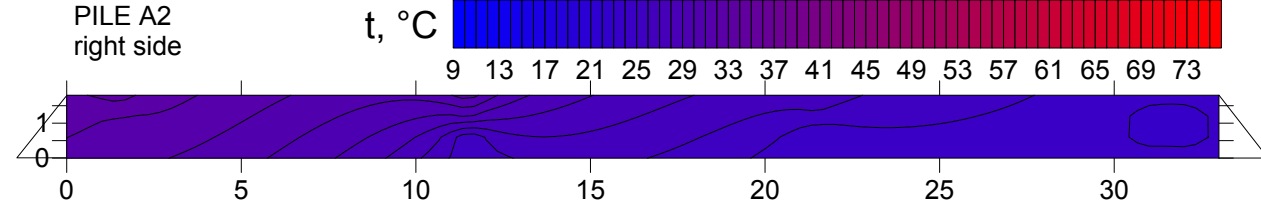

PILE A2  
left side

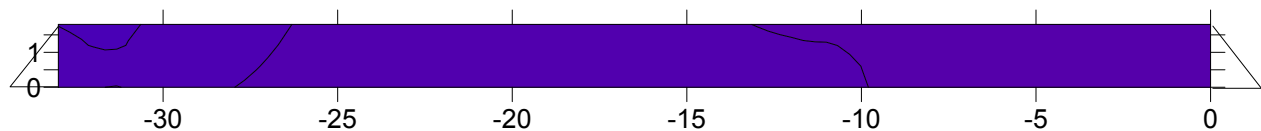

PILE A2  
length 1,5 m

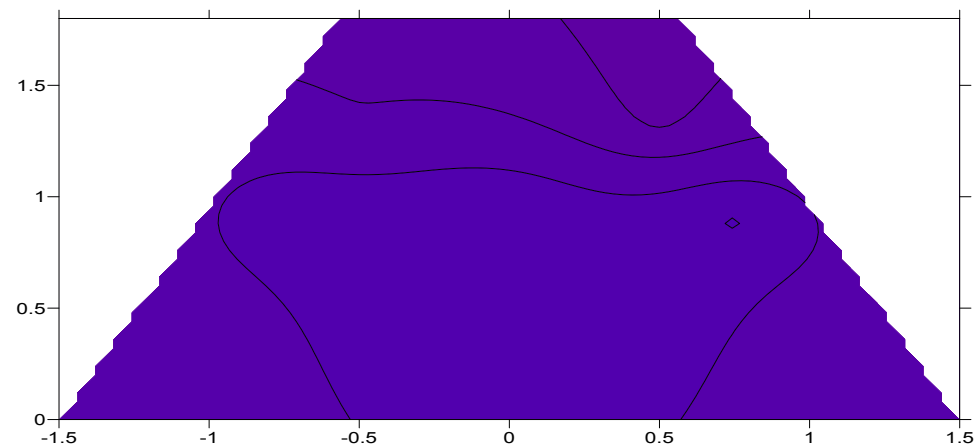

PILE A2  
length 11,5 m

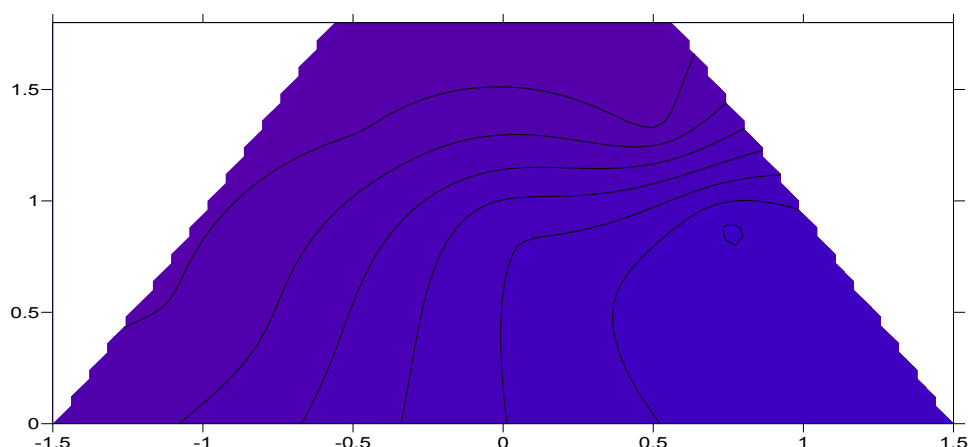

PILE A2  
length 21,5 m

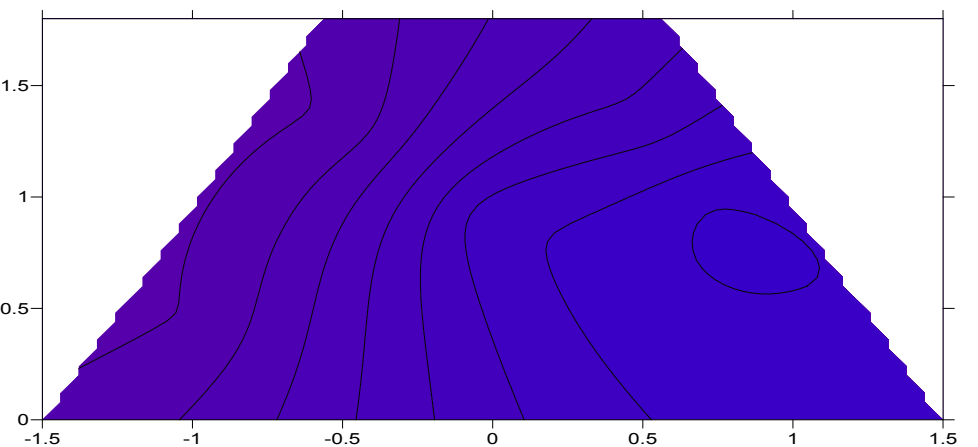

PILE A2  
length 31,5 m

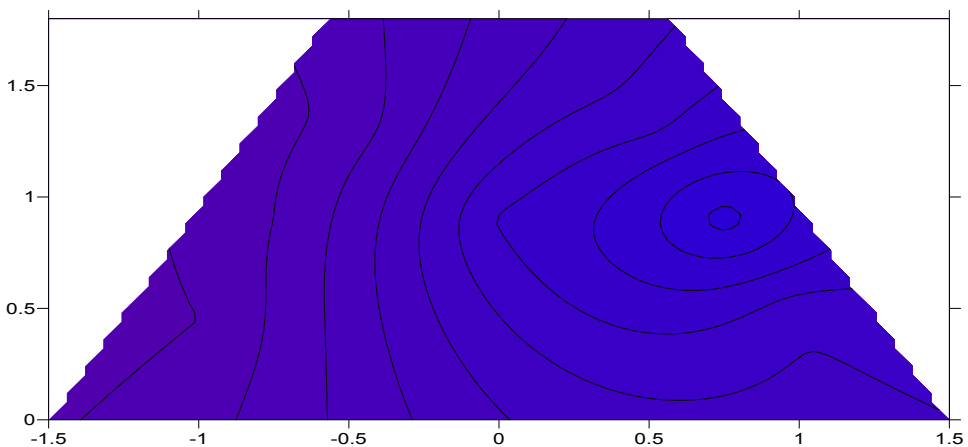

Supplement: s1 [file s1]

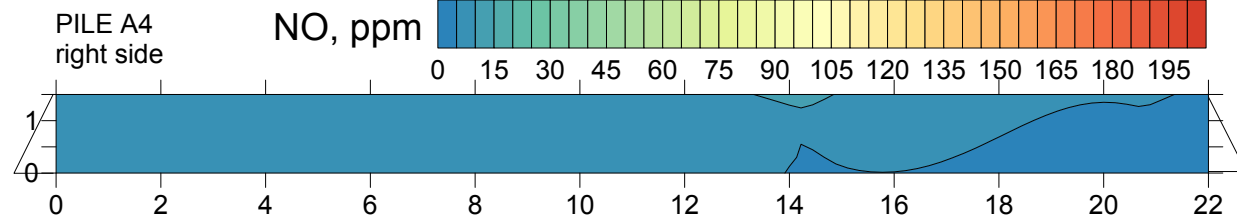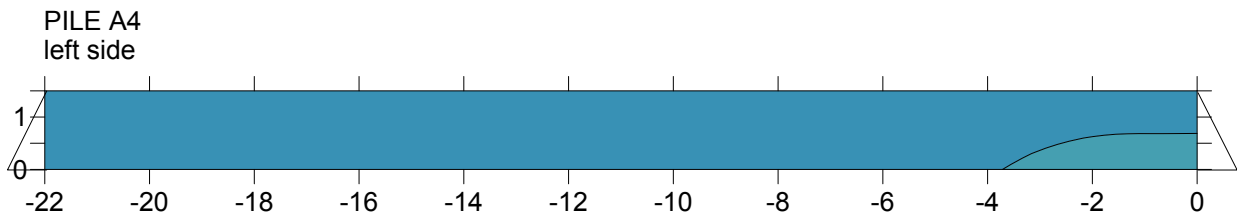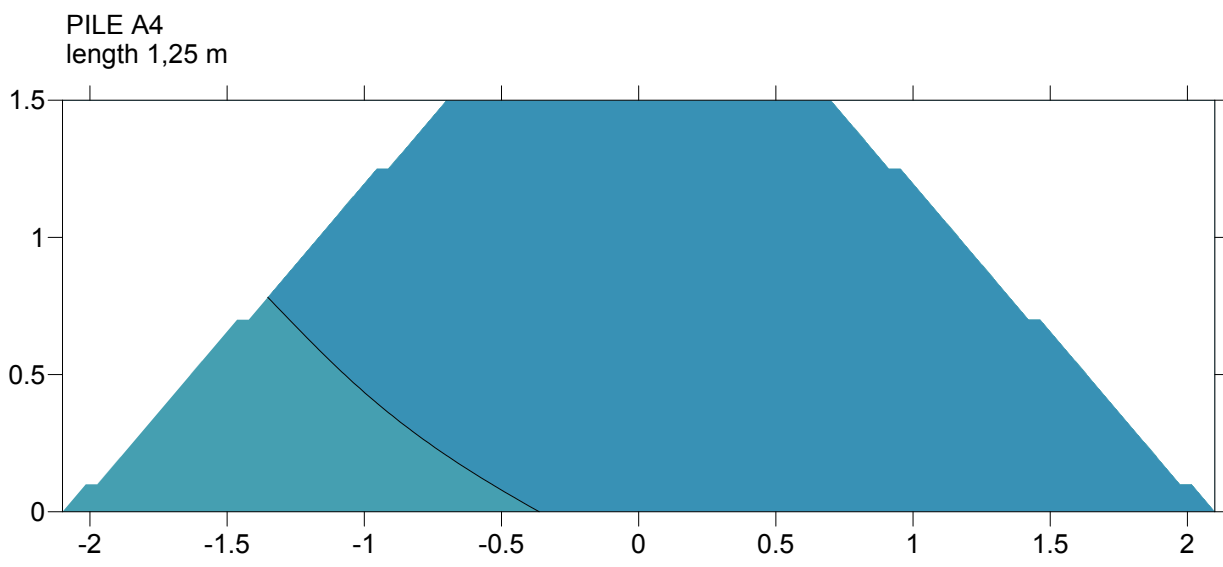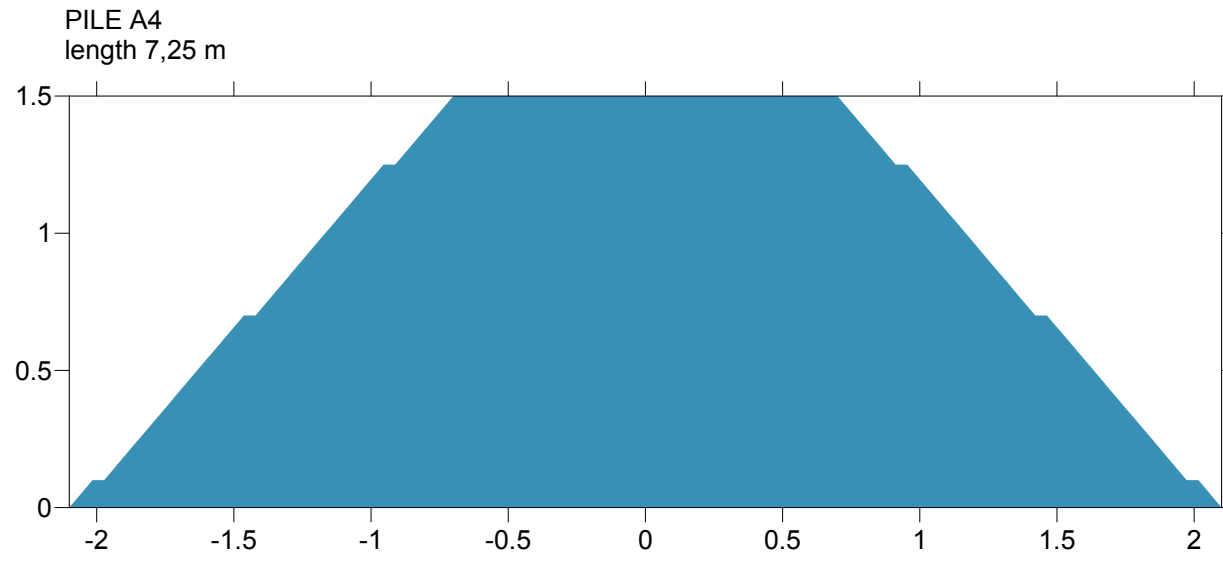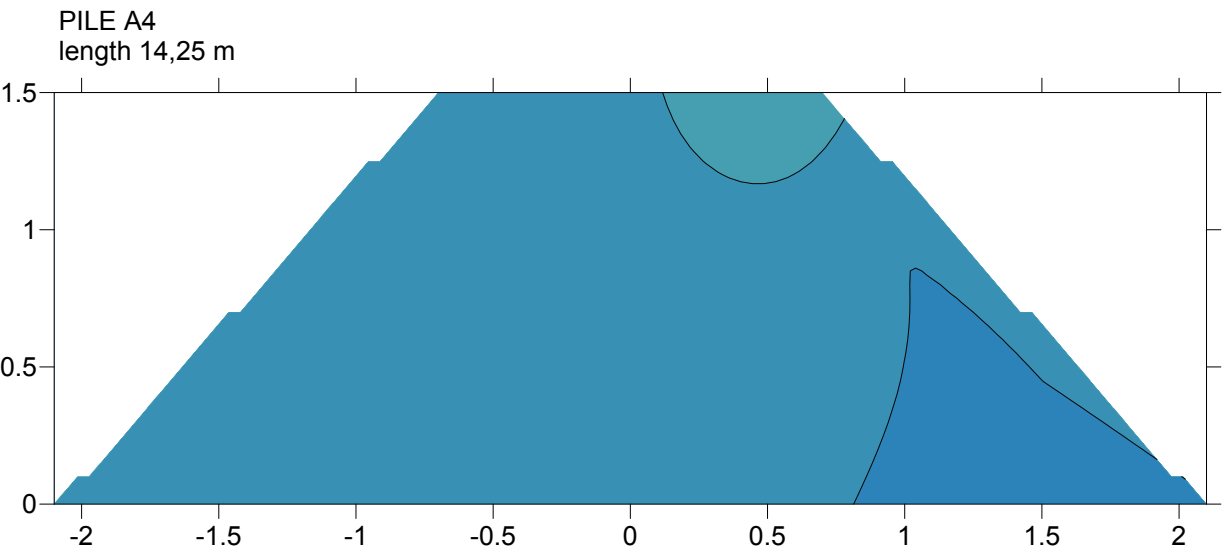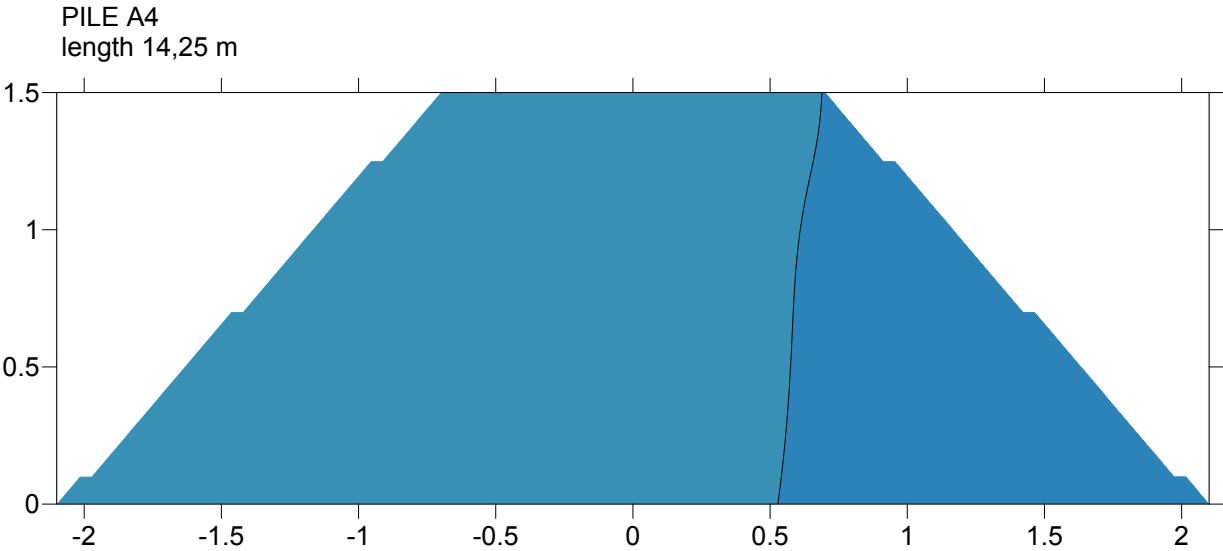

Supplement: s1 [file s1]

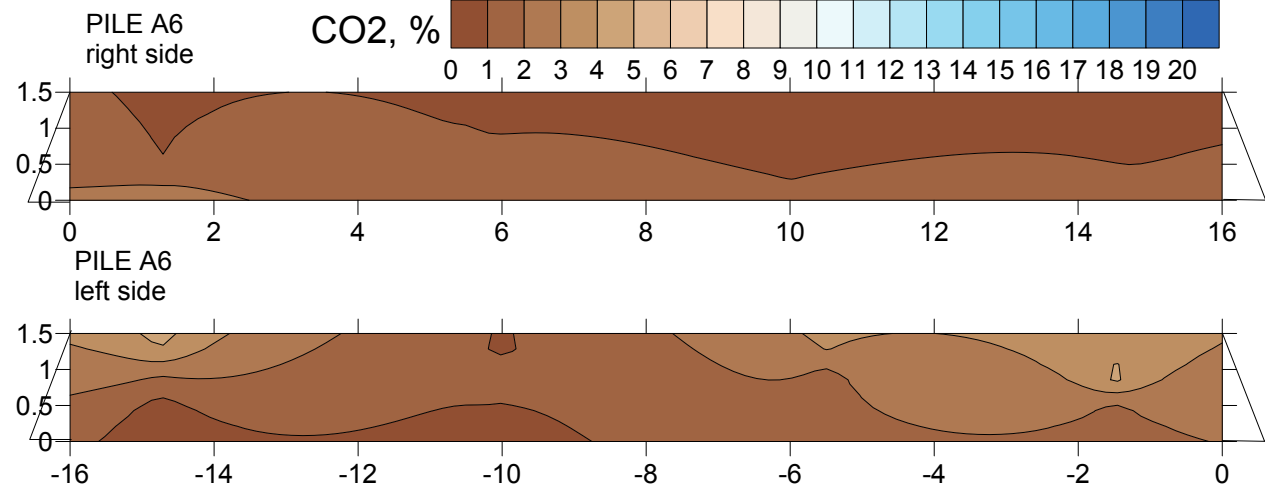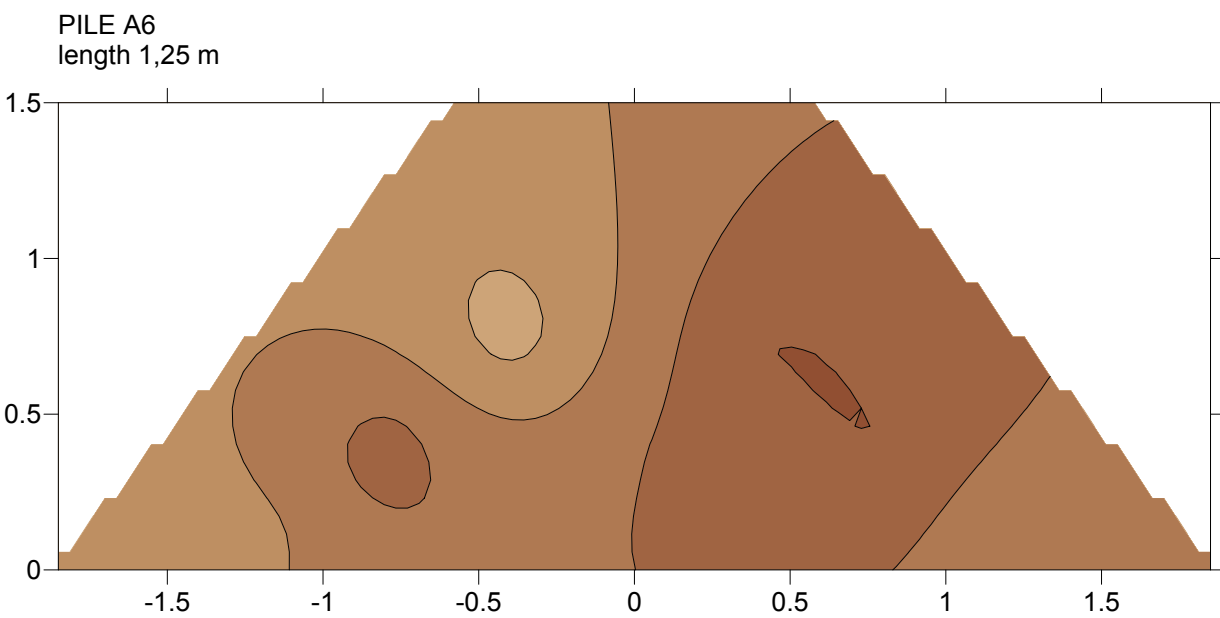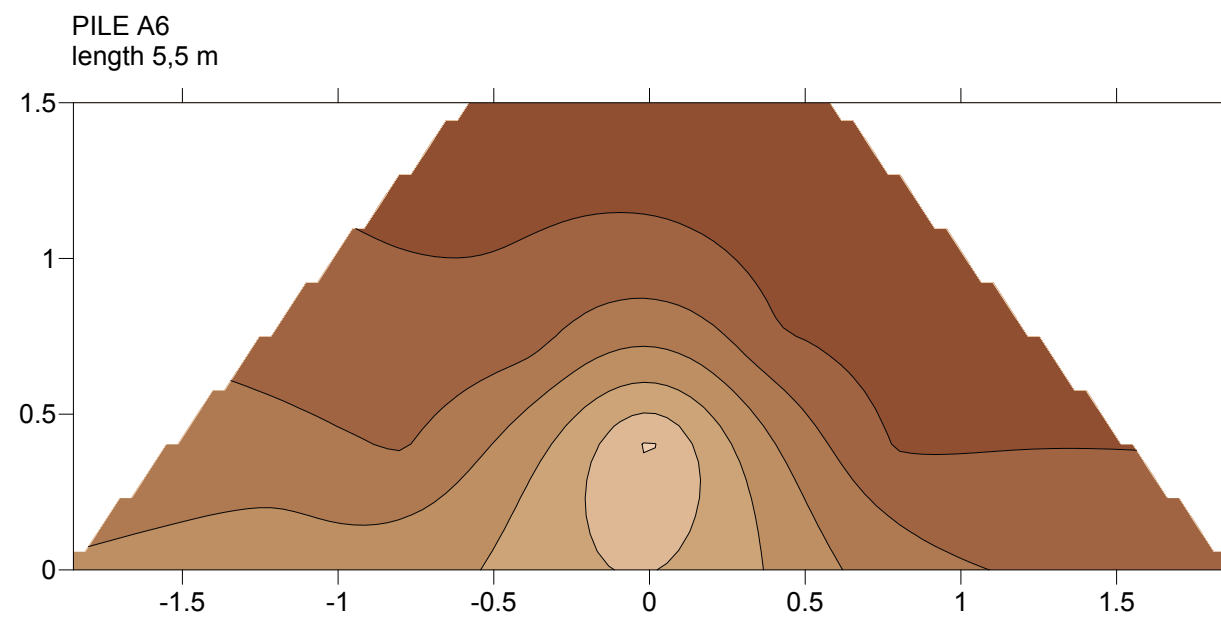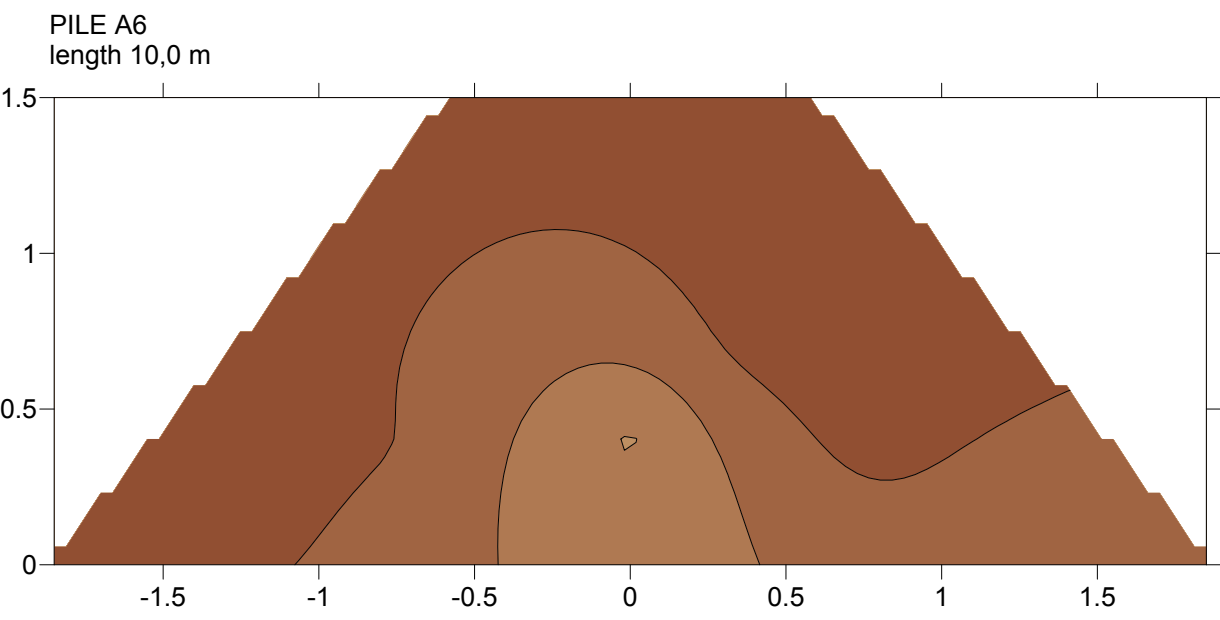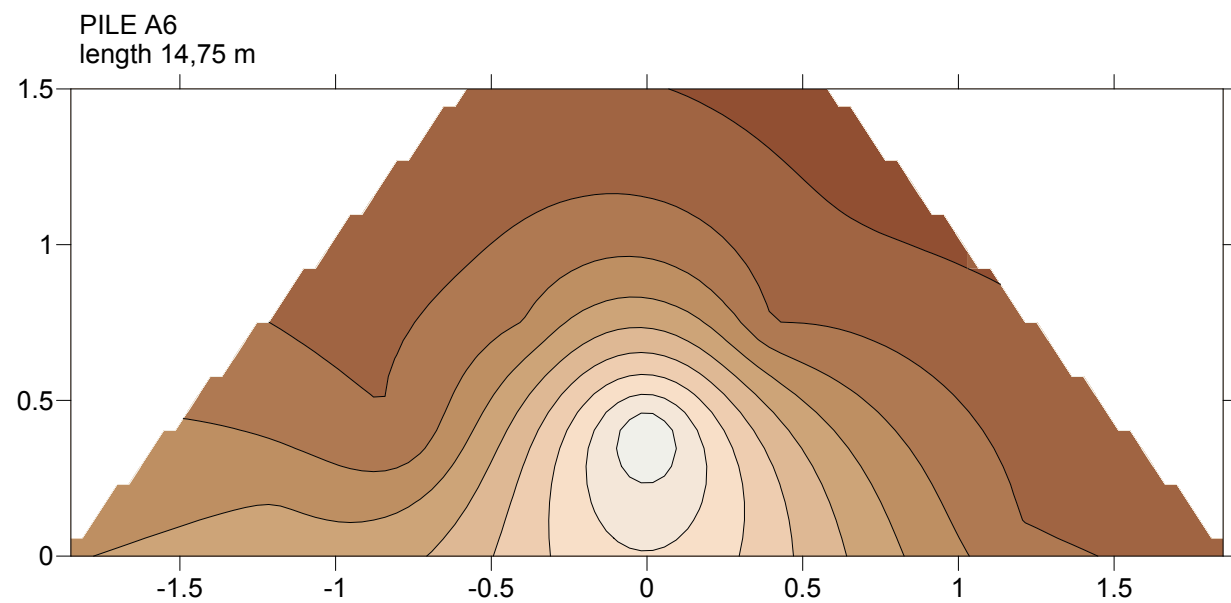

Supplement: s1 [file s1]

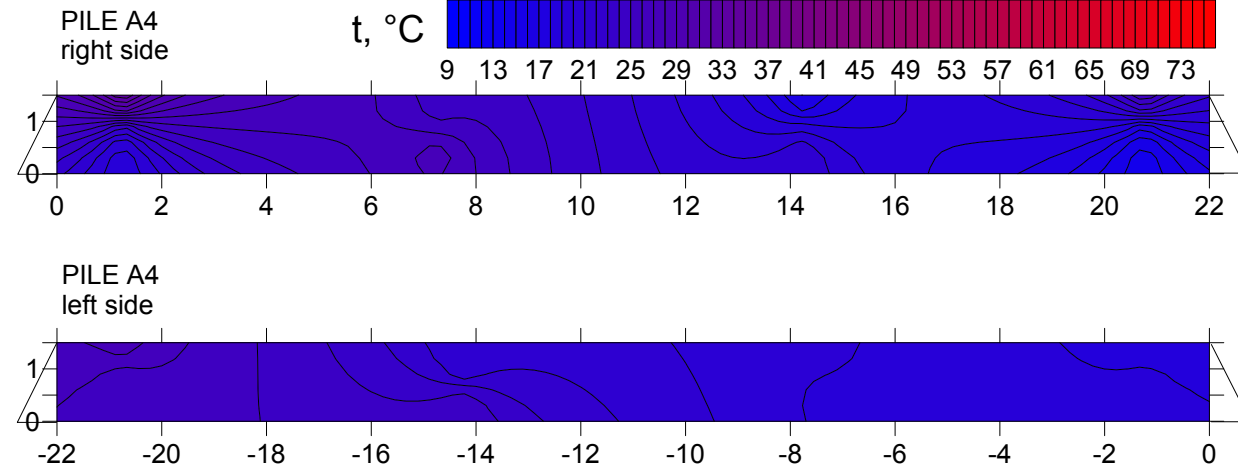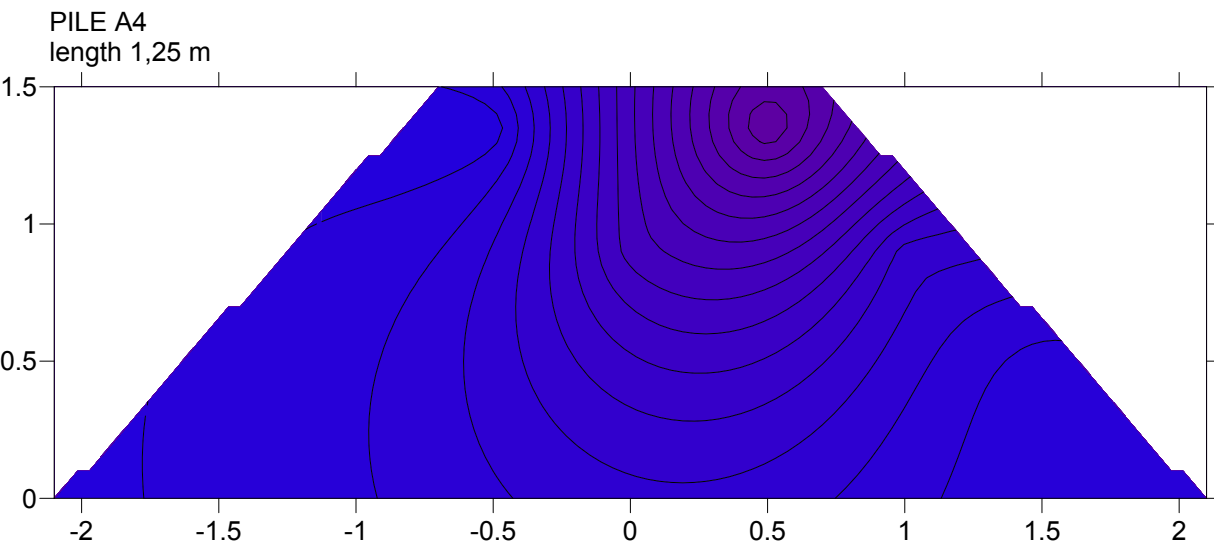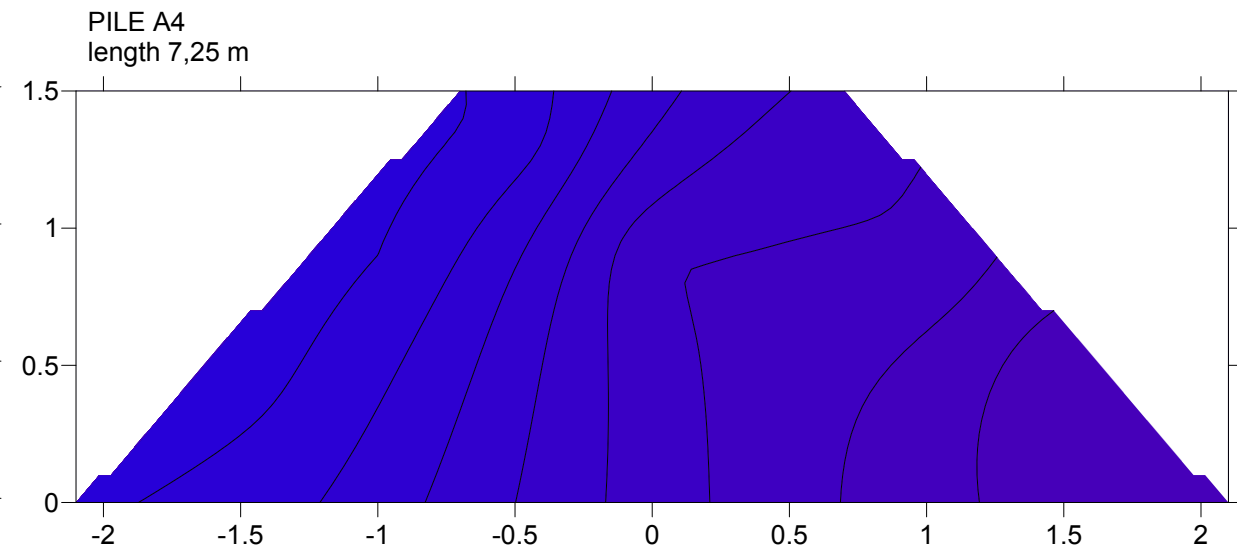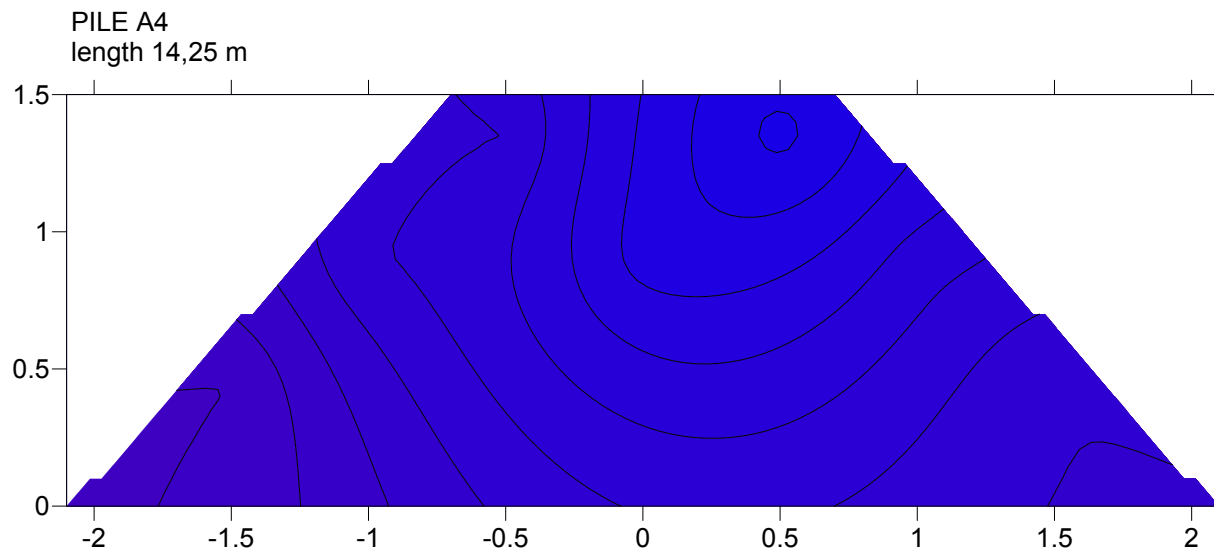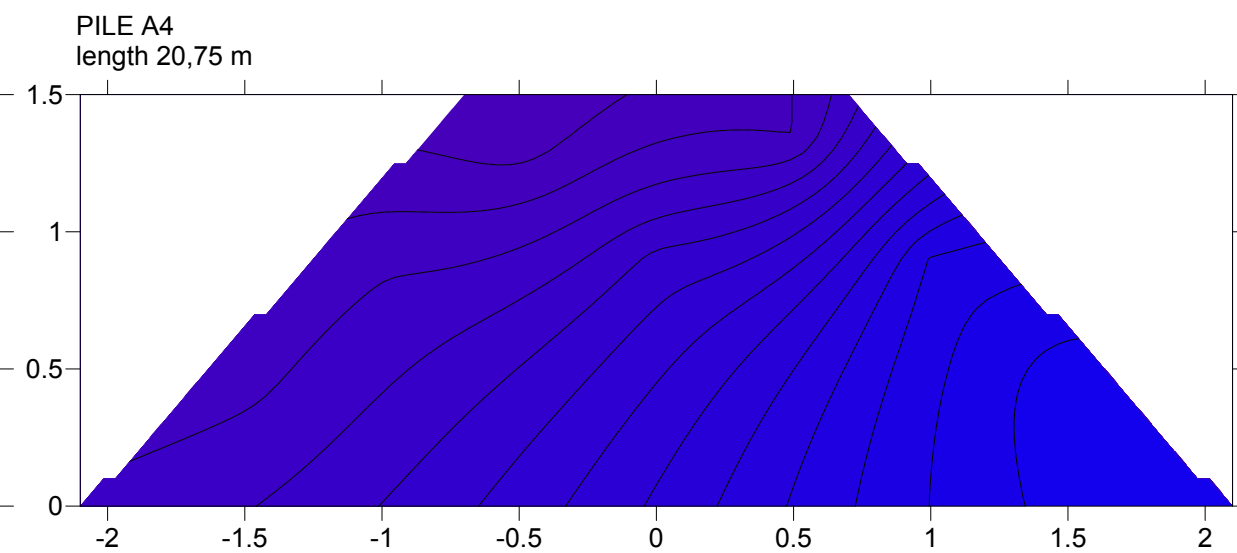

Supplement: s1 [file s1]

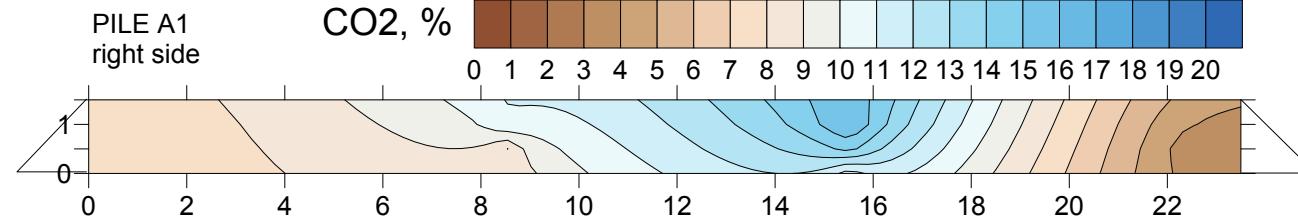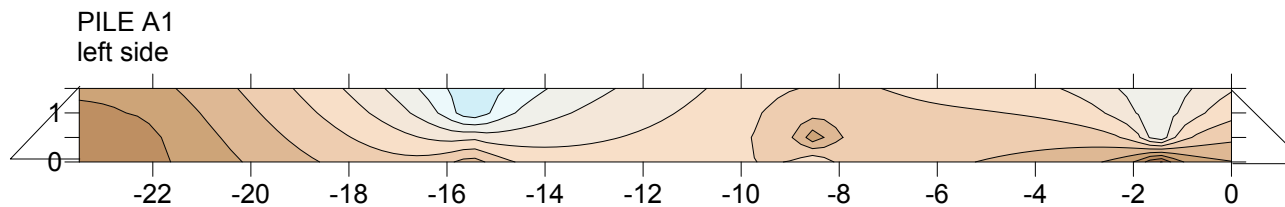

PILE A1  
length 1,5 m

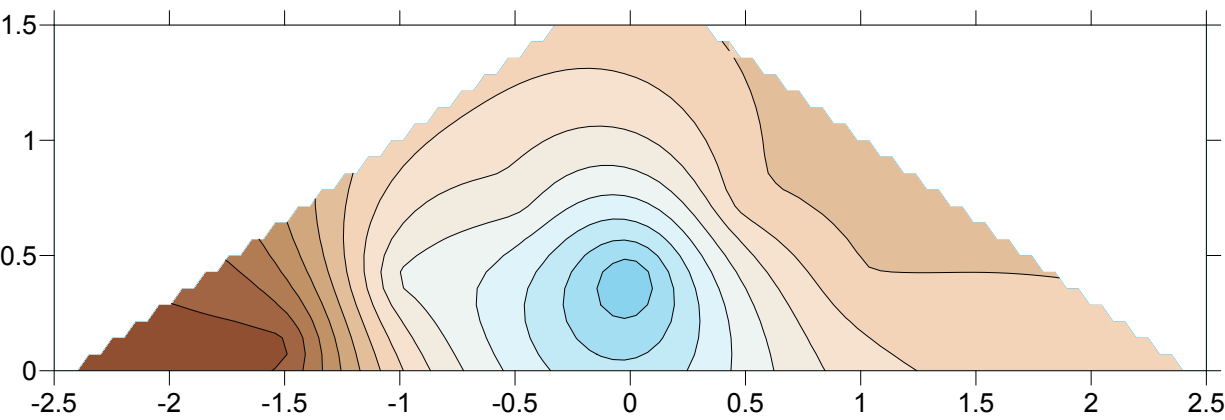

PILE A1  
length 8,5 m

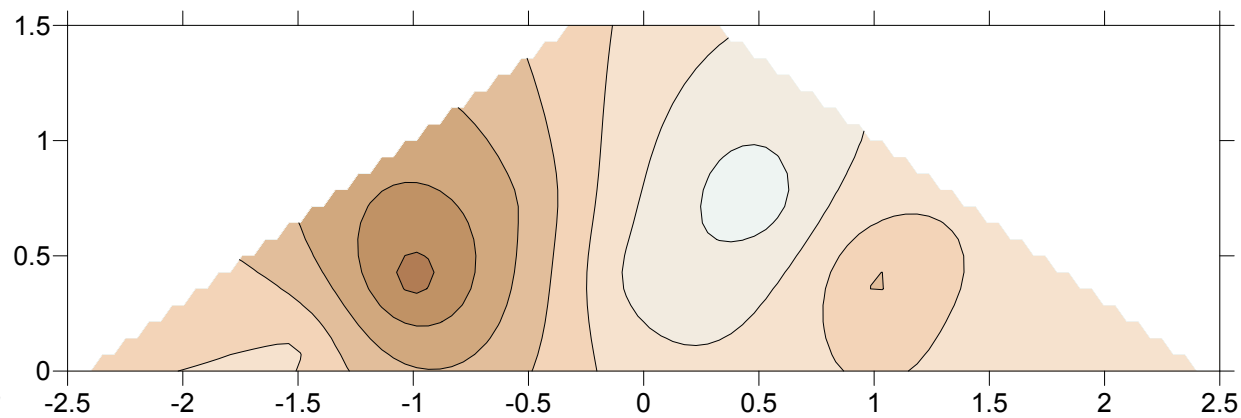

PILE A1  
length 15,5 m

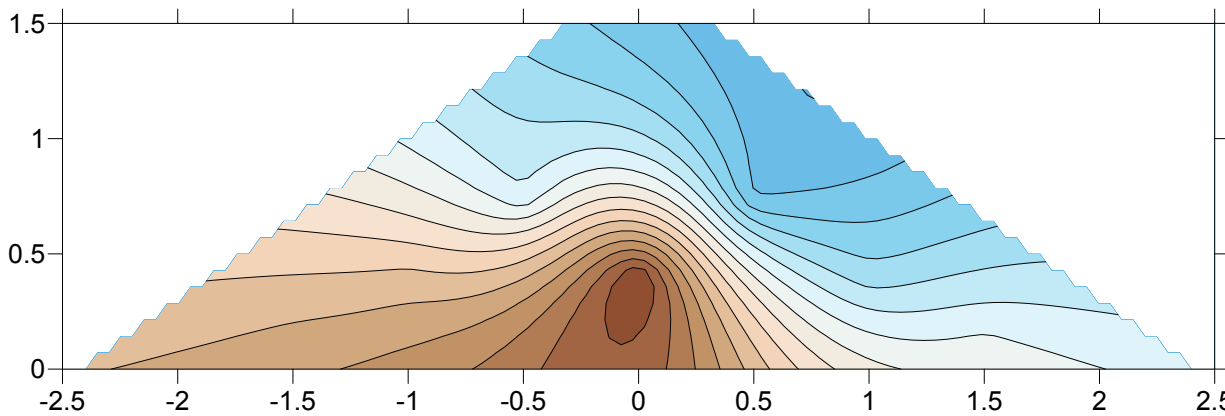

PILE A1  
length 22,5 m

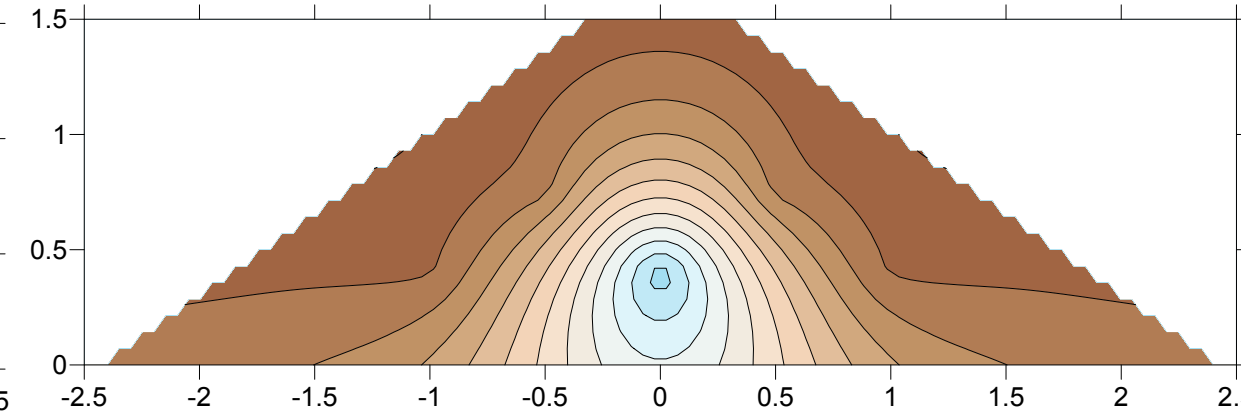

Supplement: s1 [file s1]

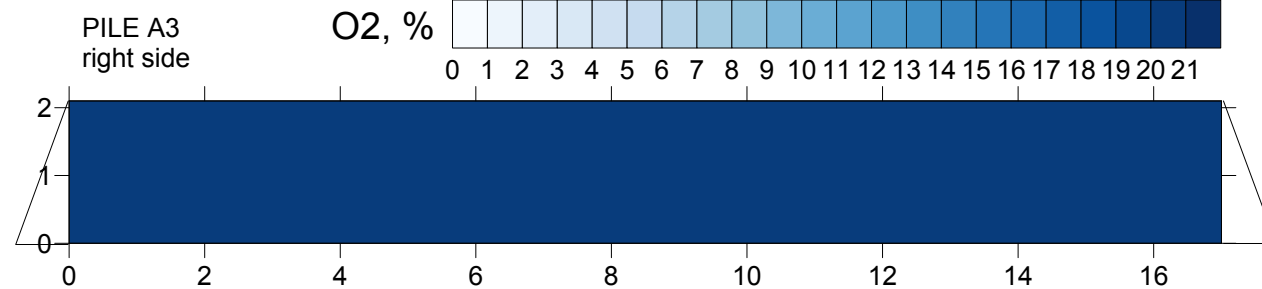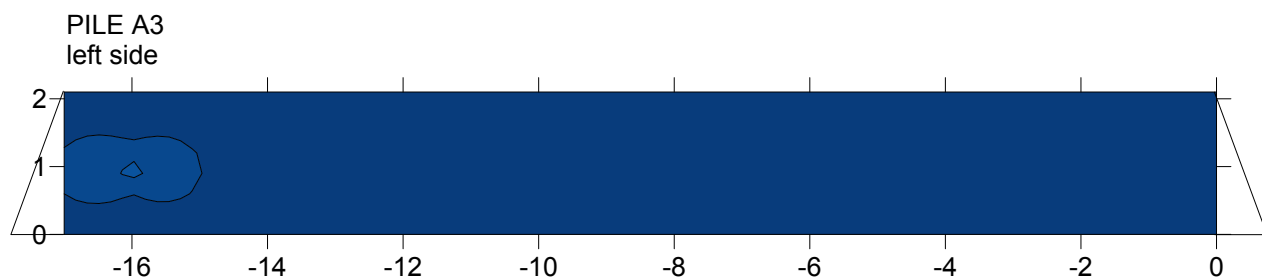

PILE A3  
length 1,0 m

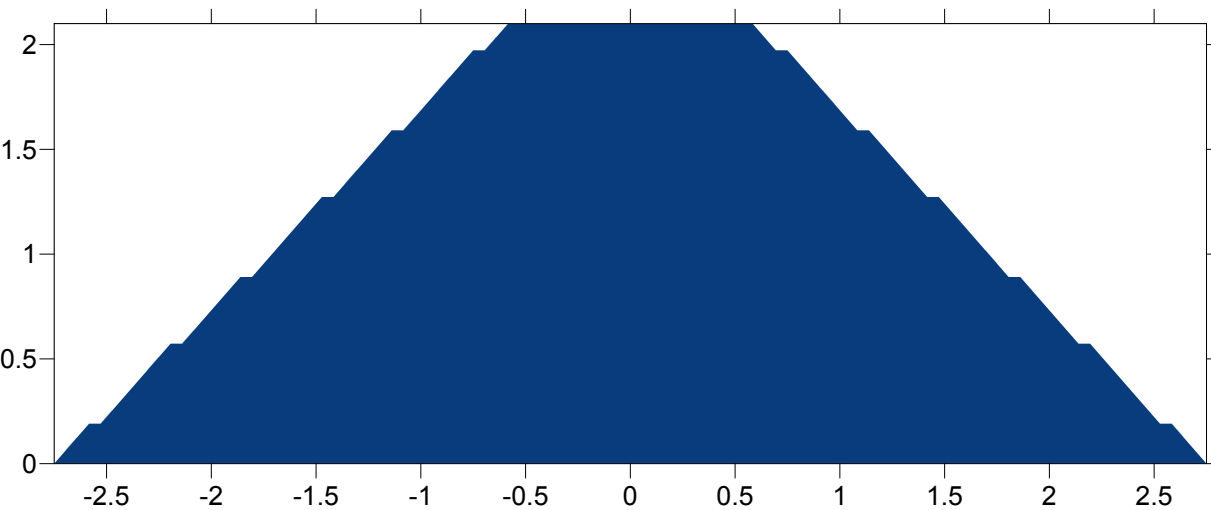

PILE A3  
length 6,0 m

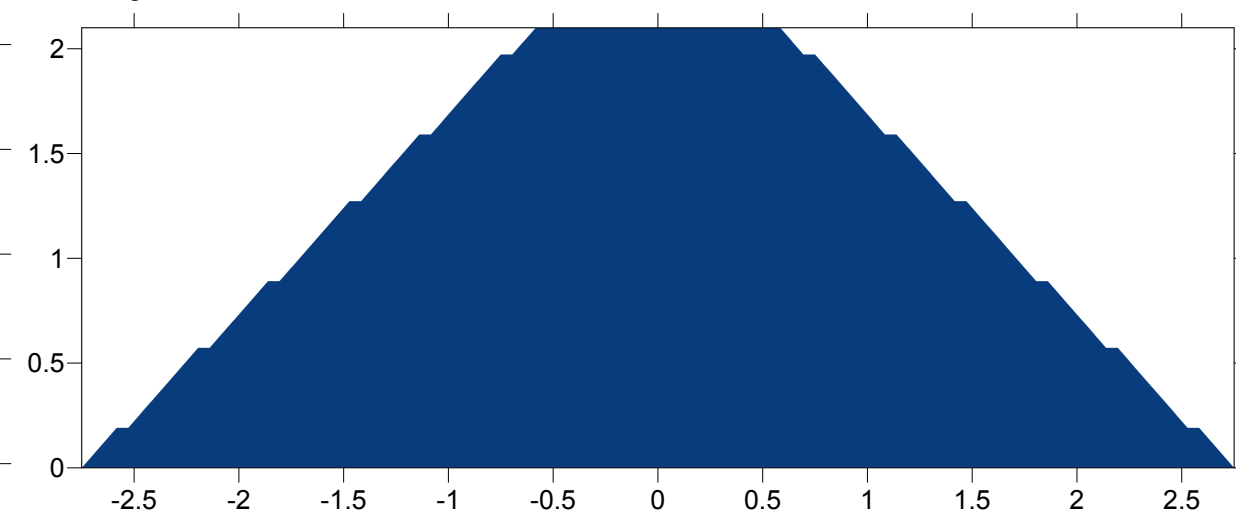

PILE A3  
length 11,0 m

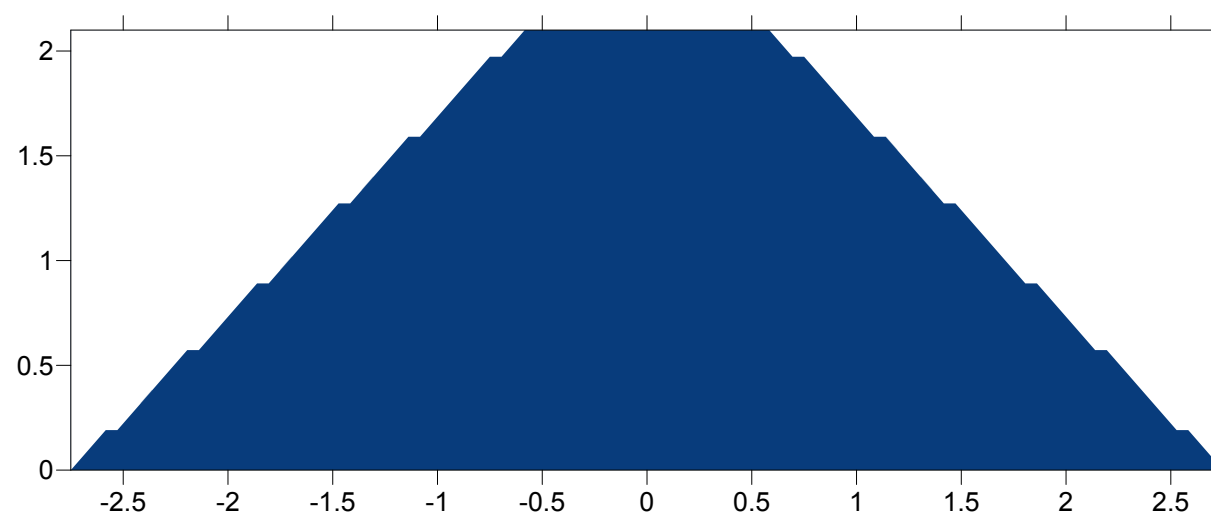

PILE A3  
length 16,0 m

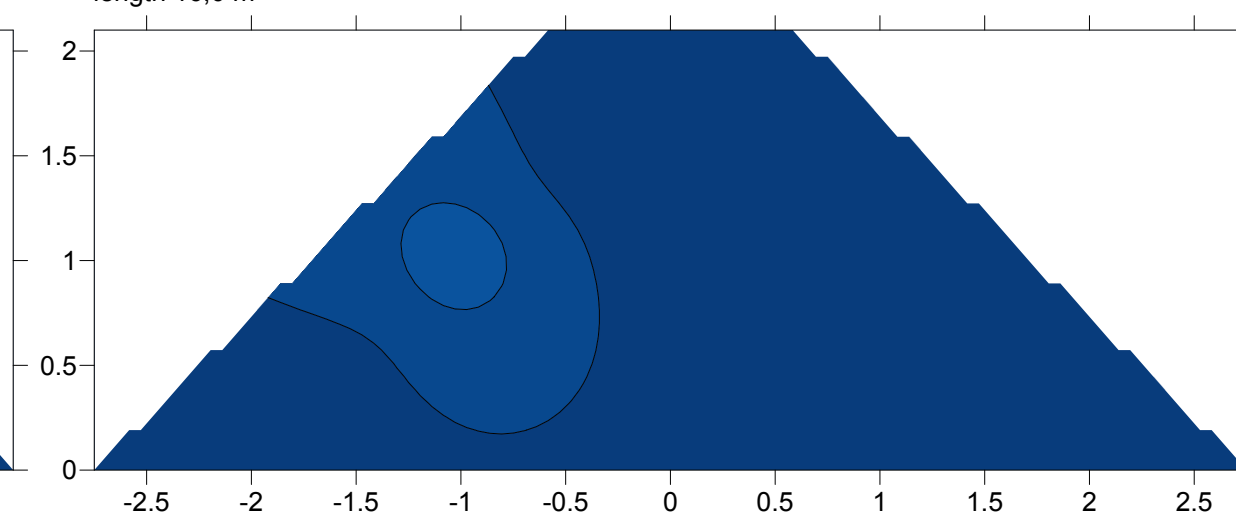

Supplement: s1 [file s1]

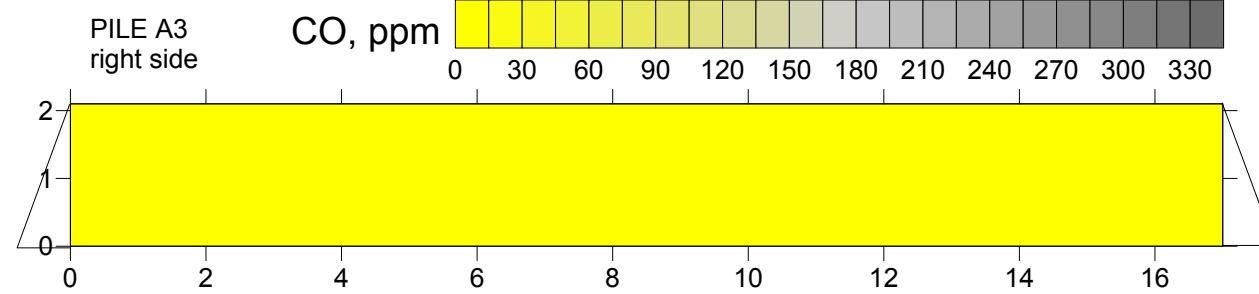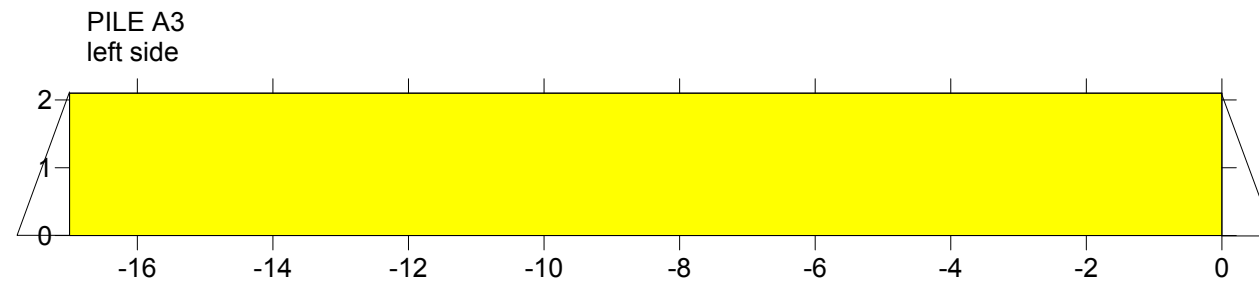

PILE A3  
length 1,0 m

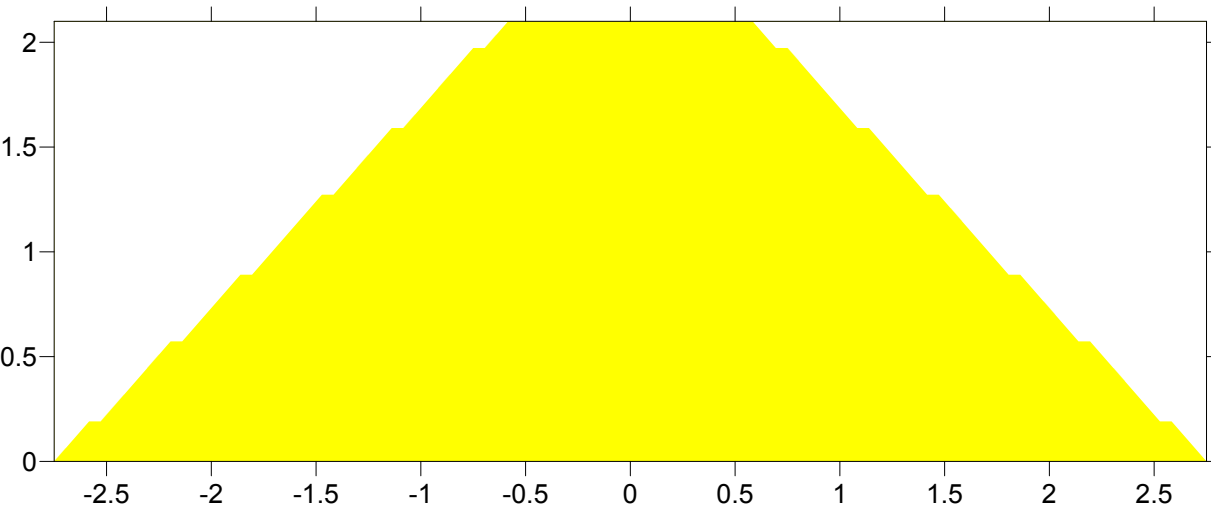

PILE A3  
length 6,0 m

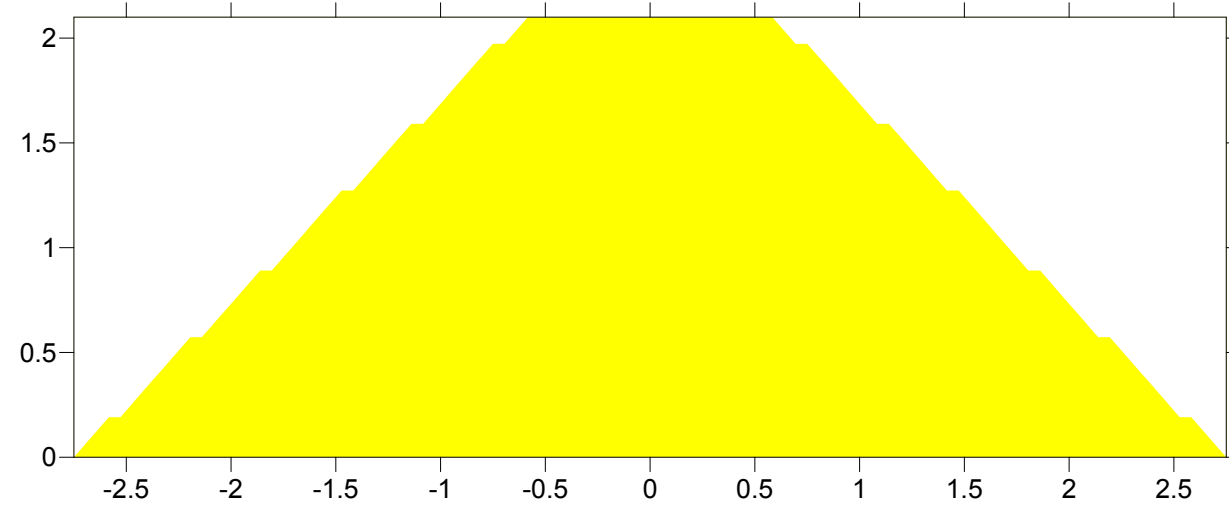

PILE A3  
length 11,0 m

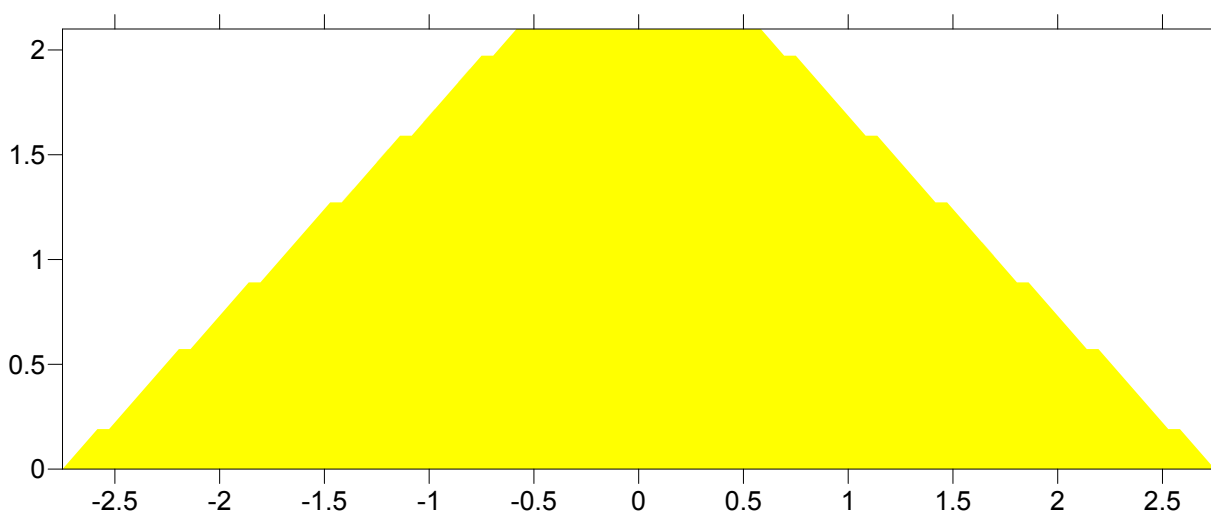

PILE A3  
length 16,0 m

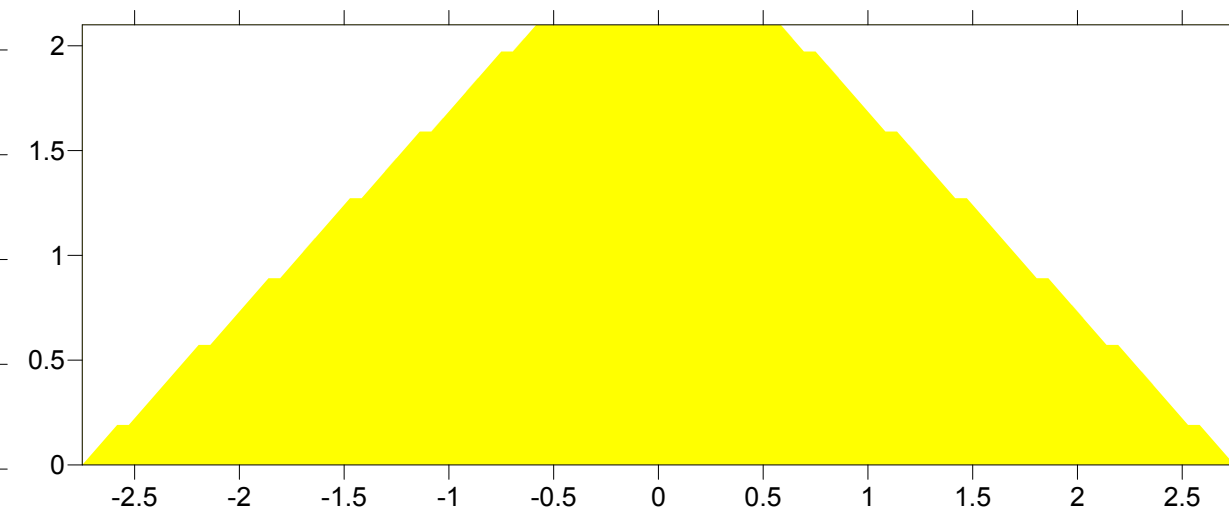

Supplement: s1 [file s1]

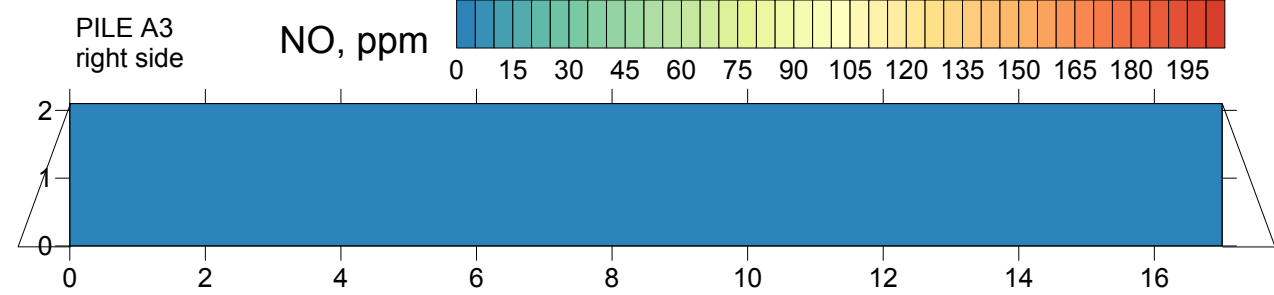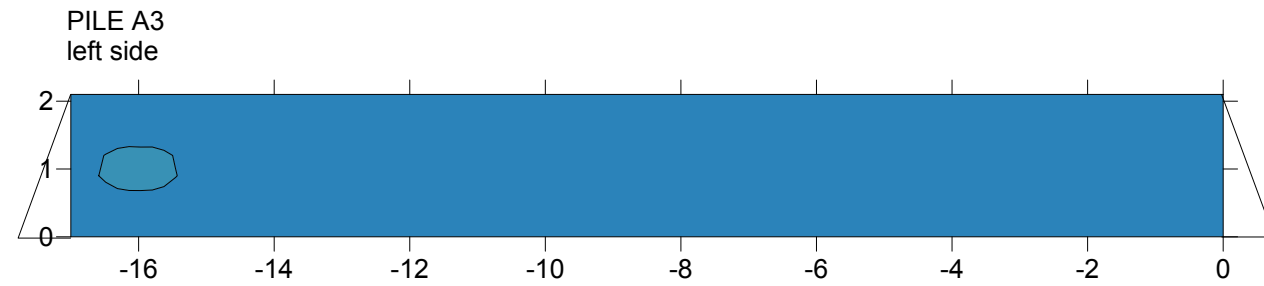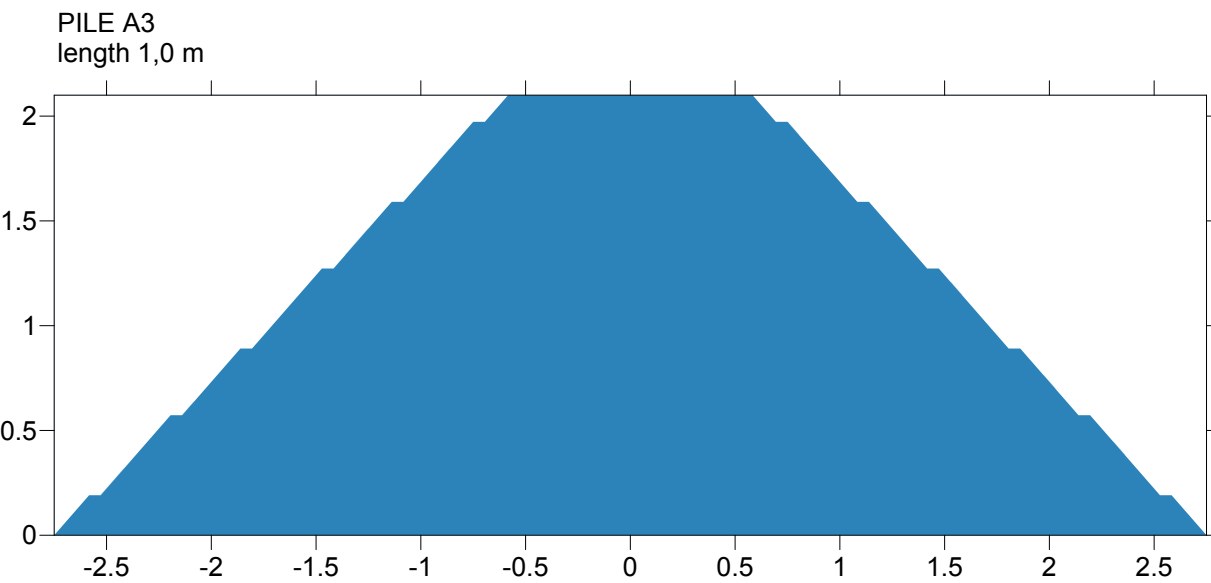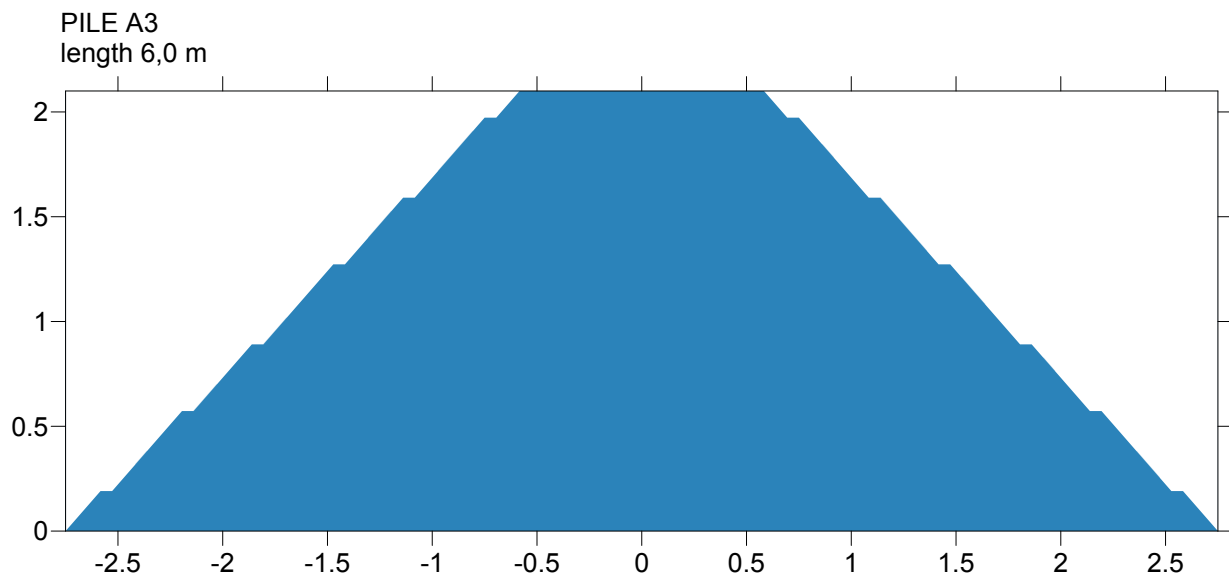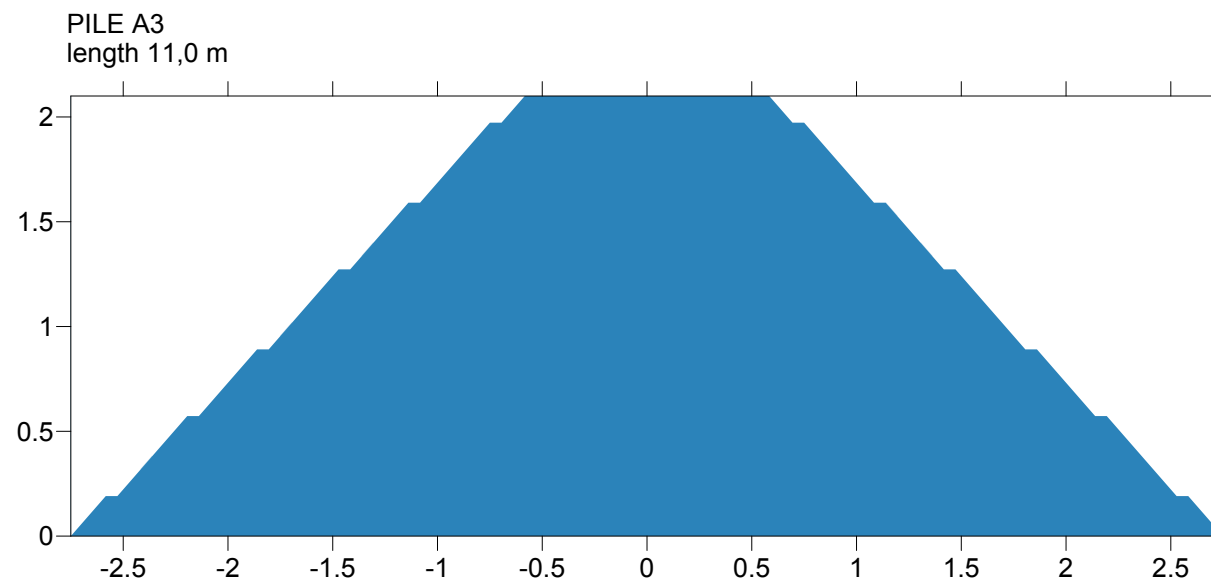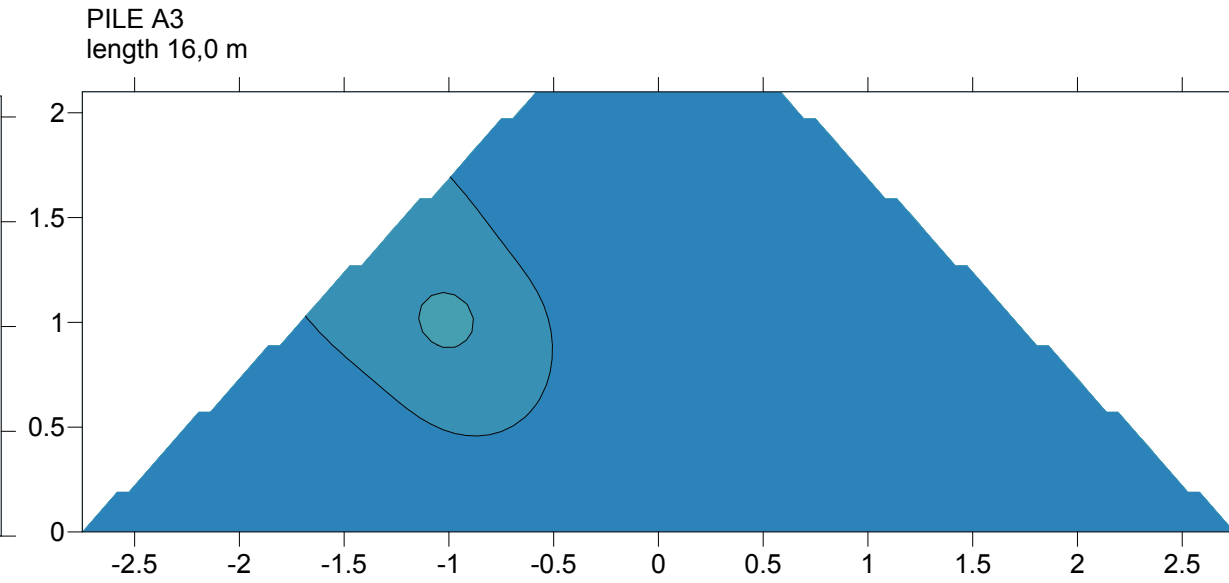

Supplement: s1 [file s1]

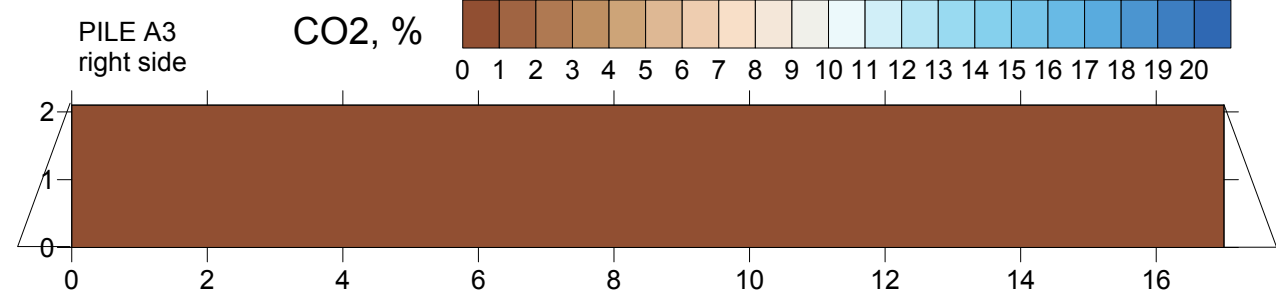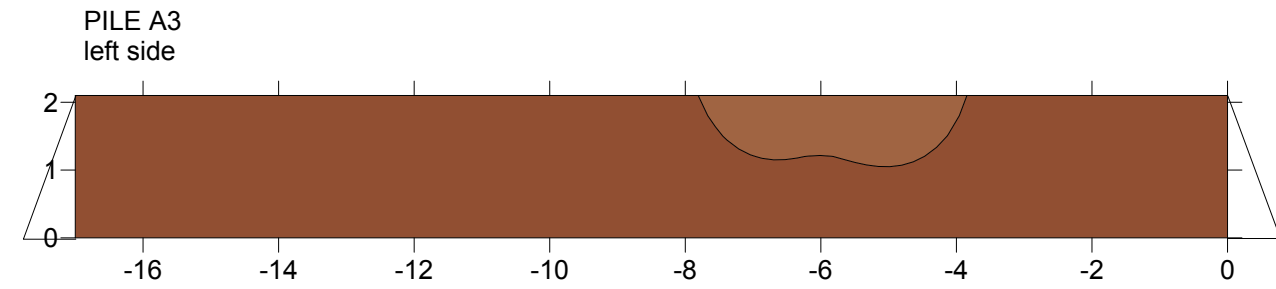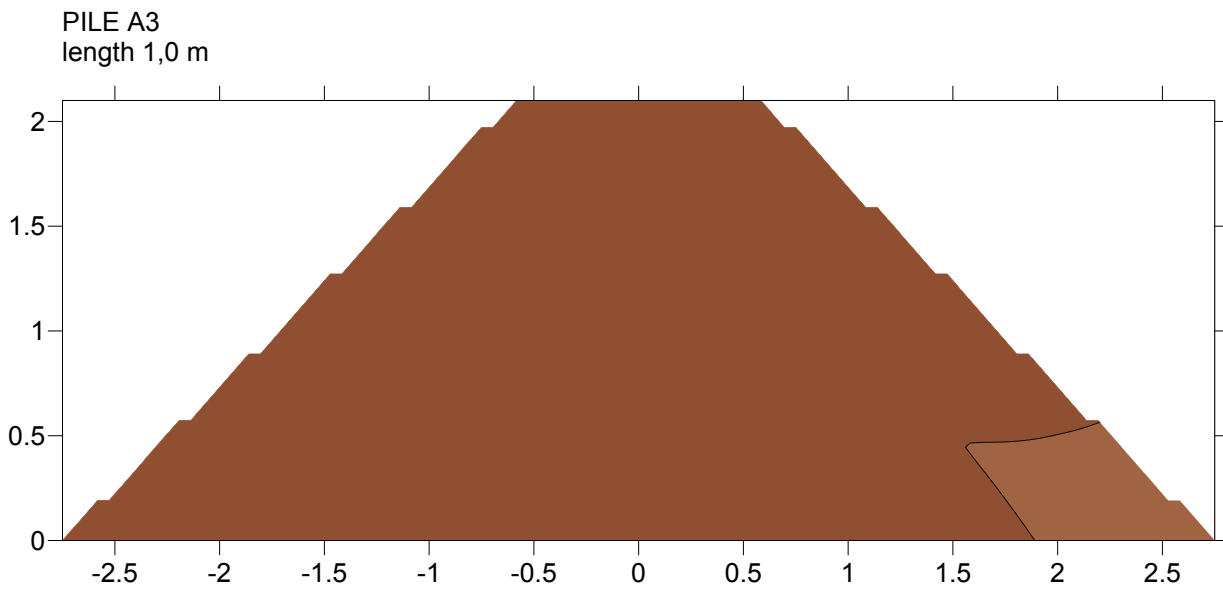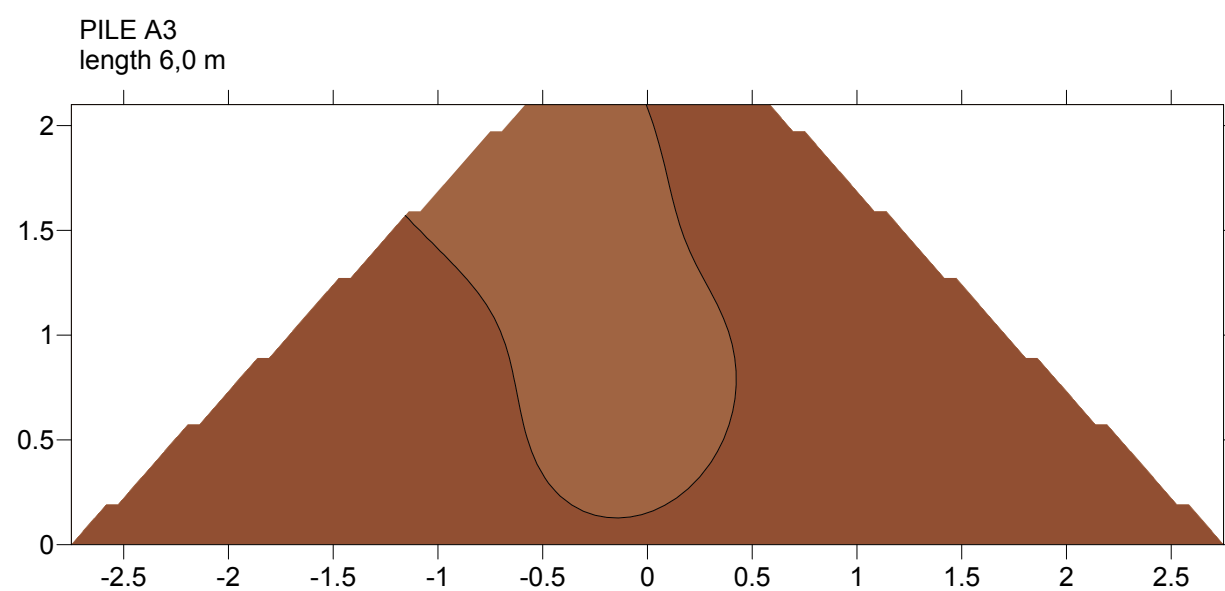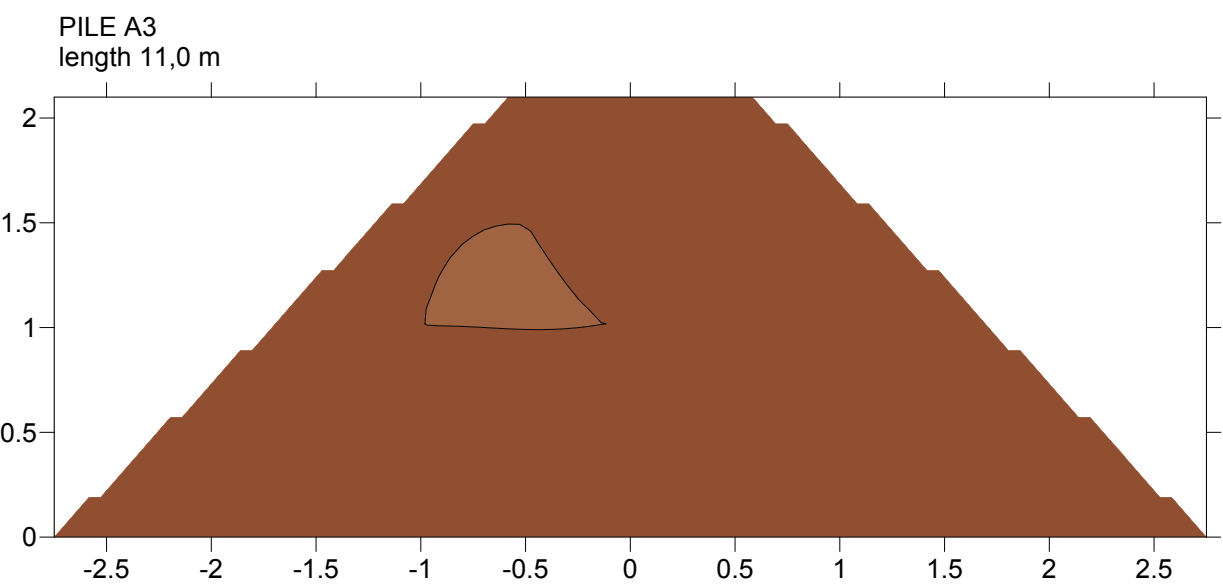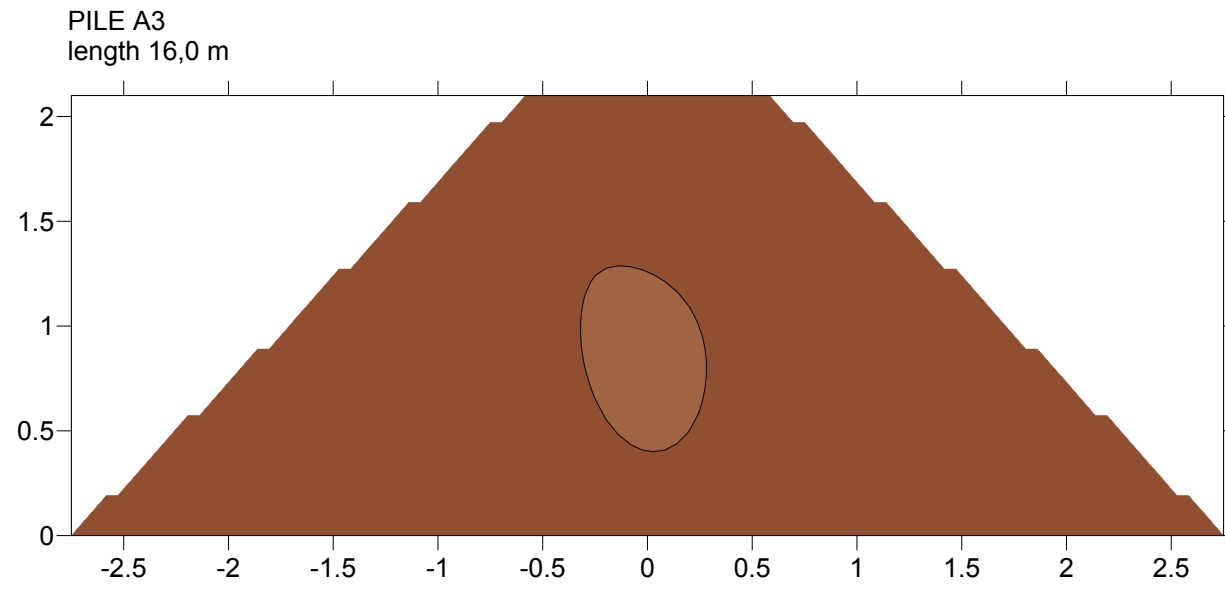

Supplement: s1 [file s1]

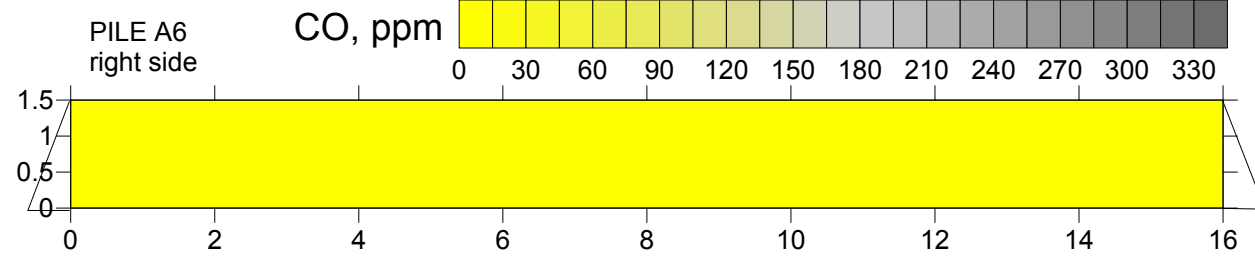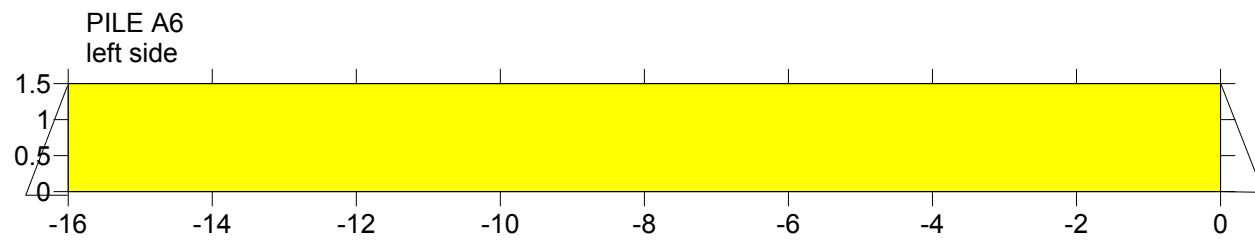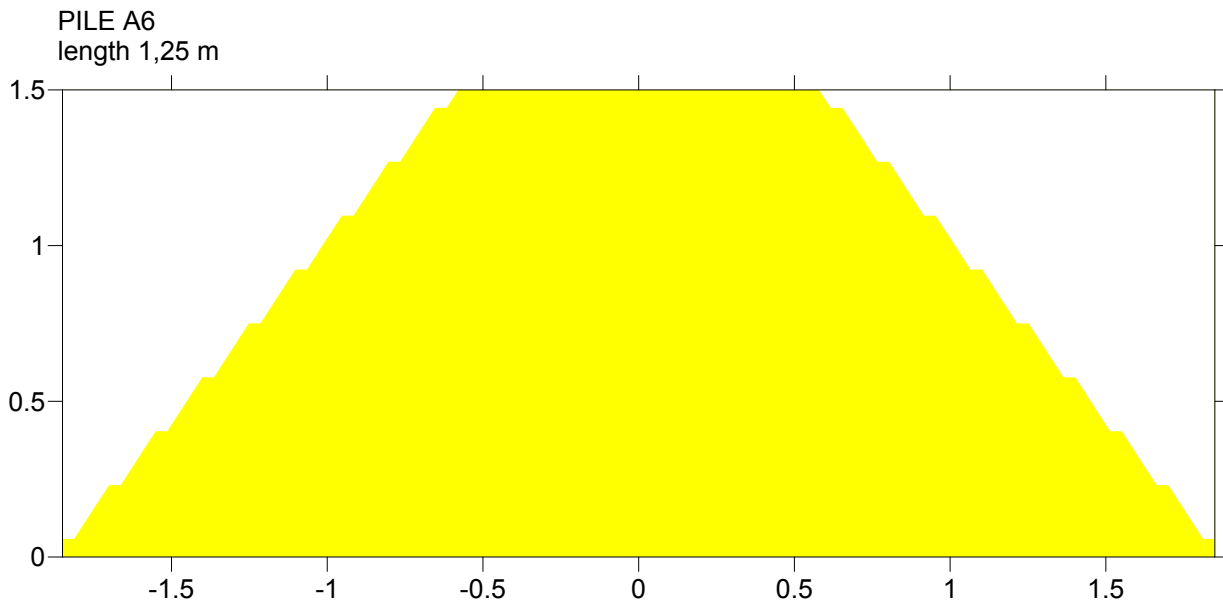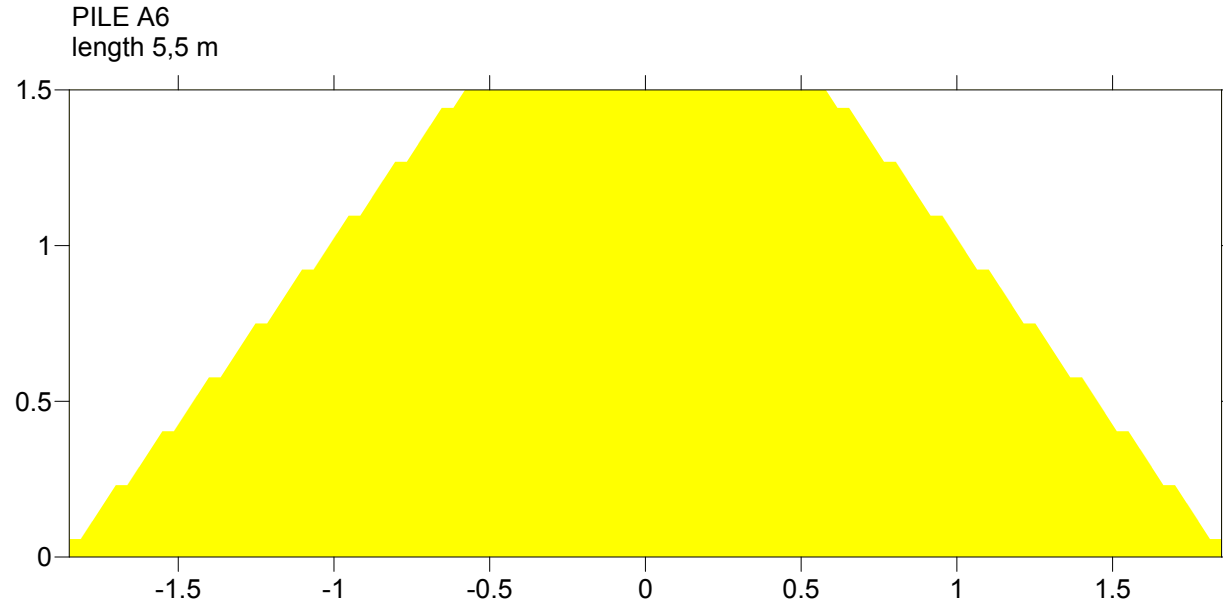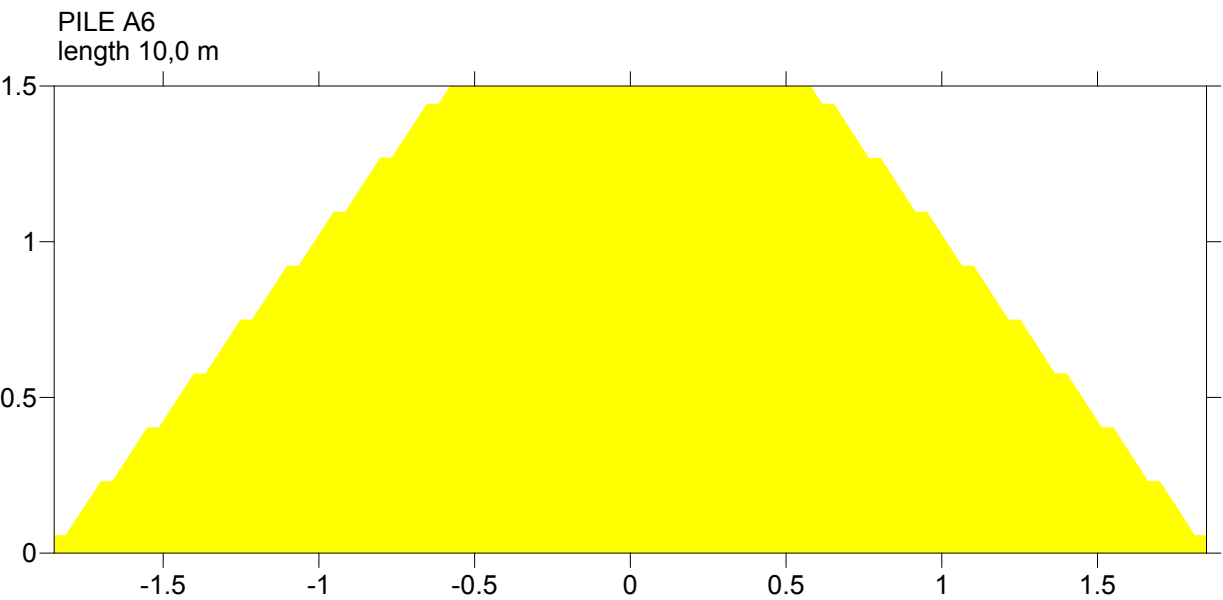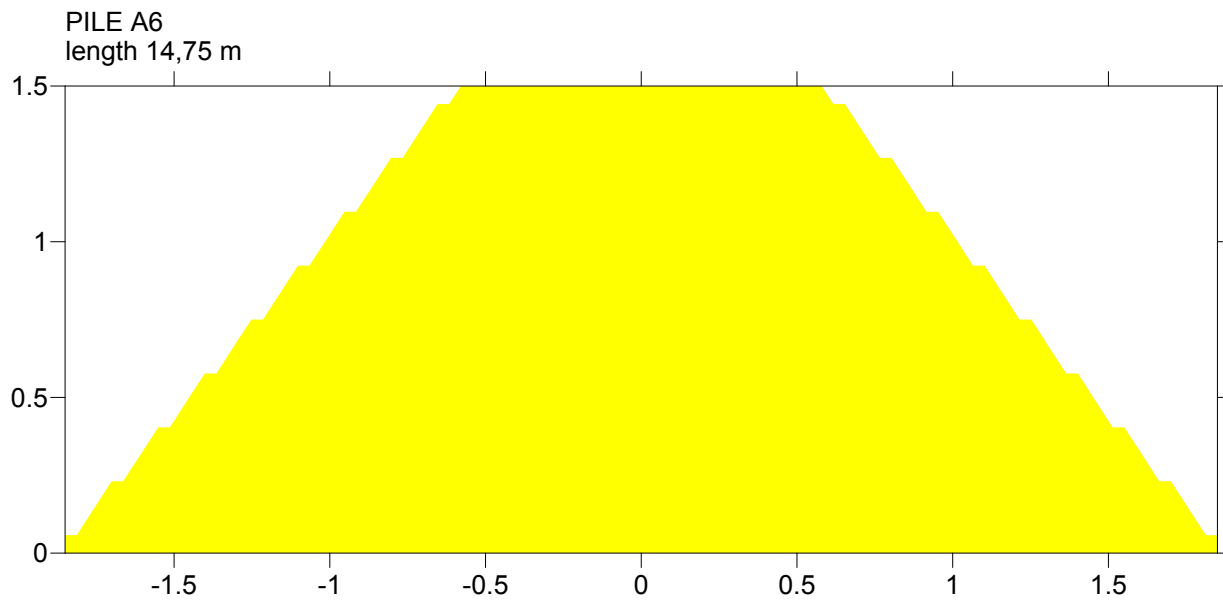

Supplement: s1 [file s1]

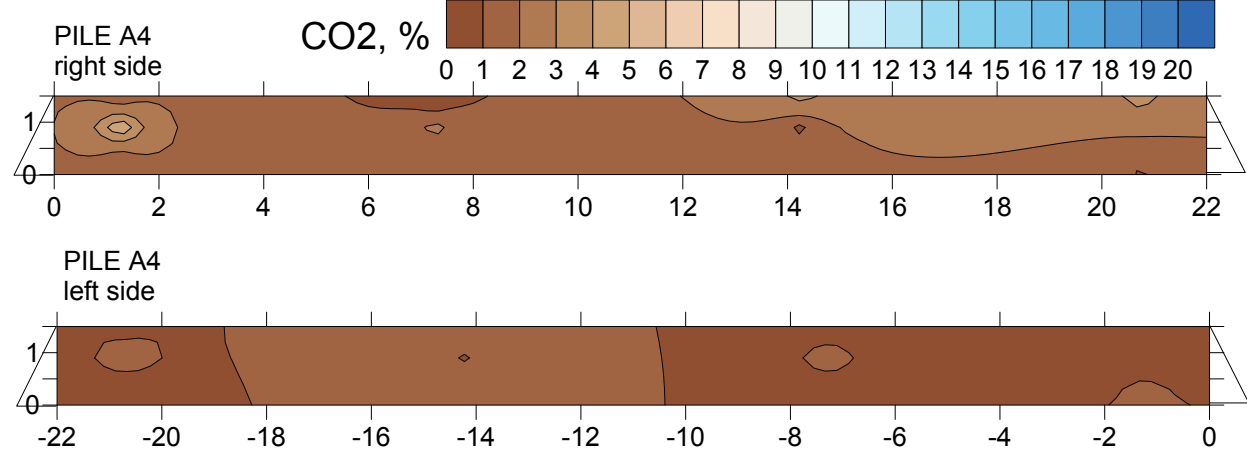

PILE A4  
length 1,25 m

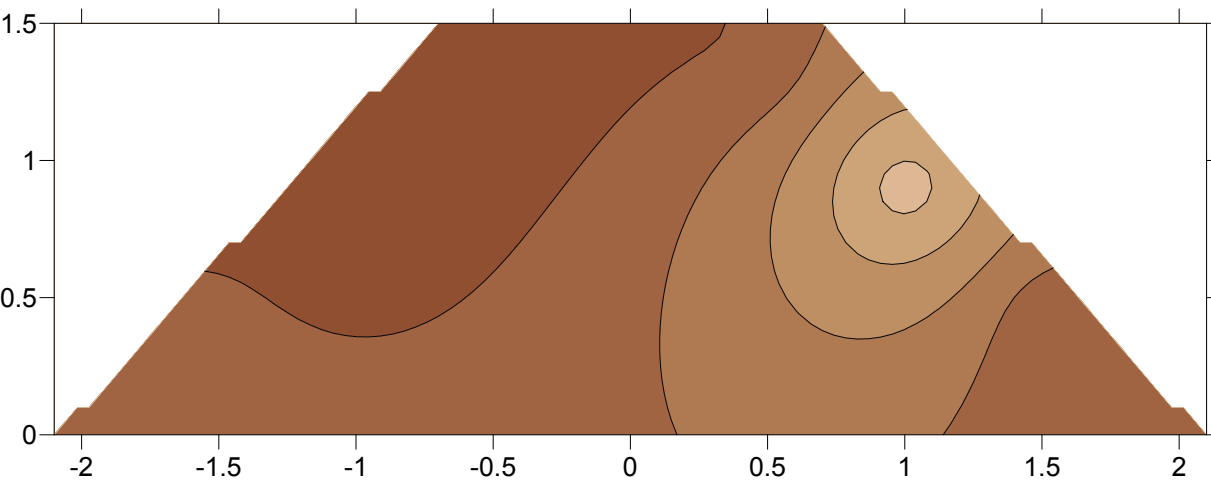

PILE A4  
length 7,25 m

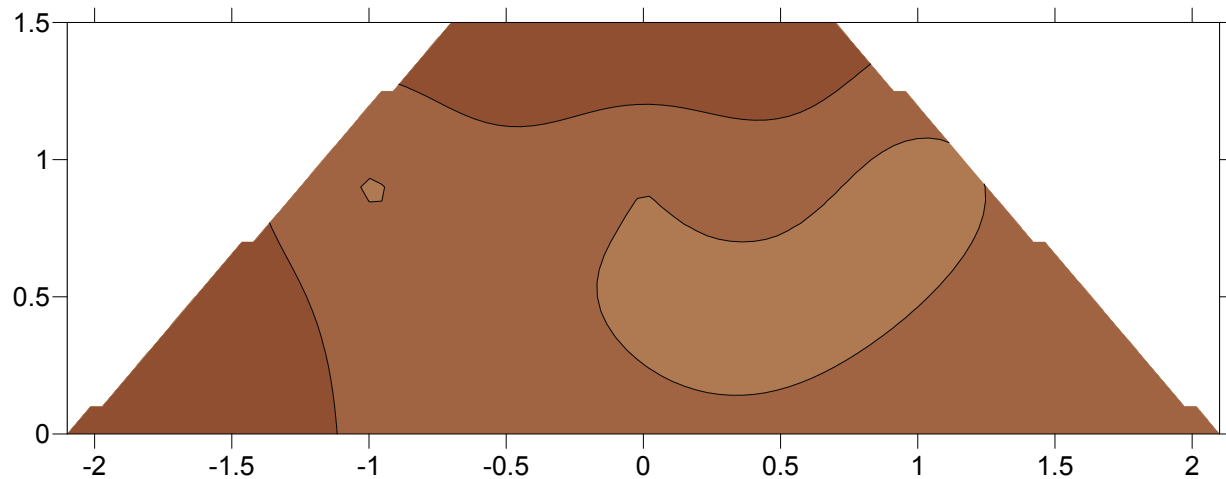

PILE A4  
length 14,25 m

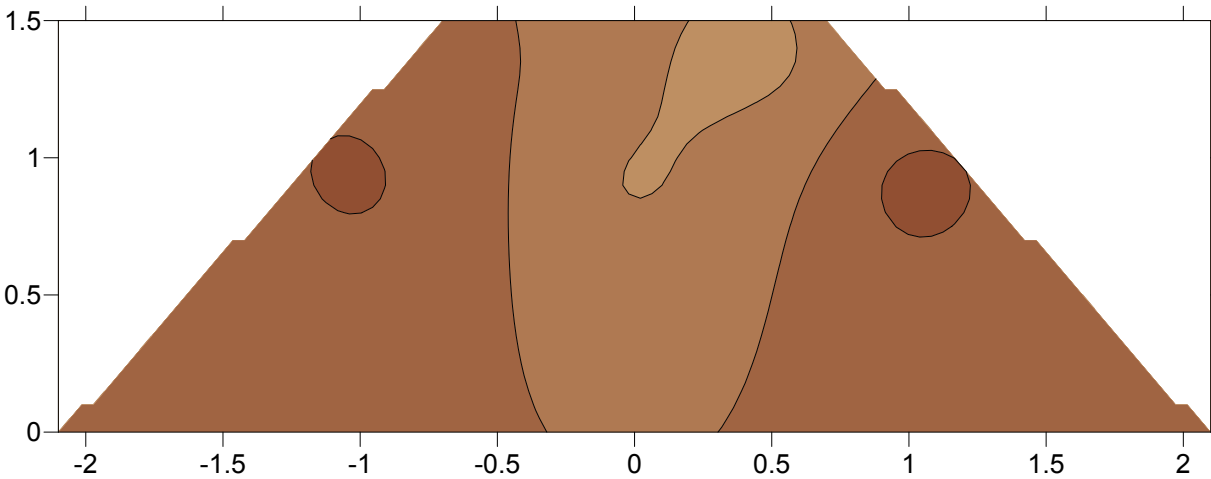

PILE A4  
length 20,75 m

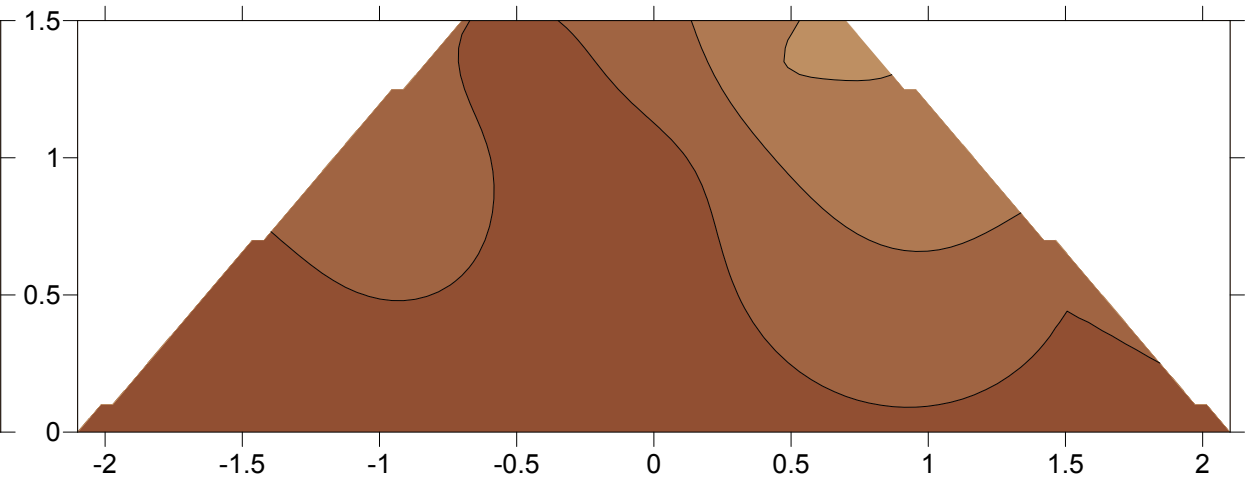

Supplement: s1 [file s1]

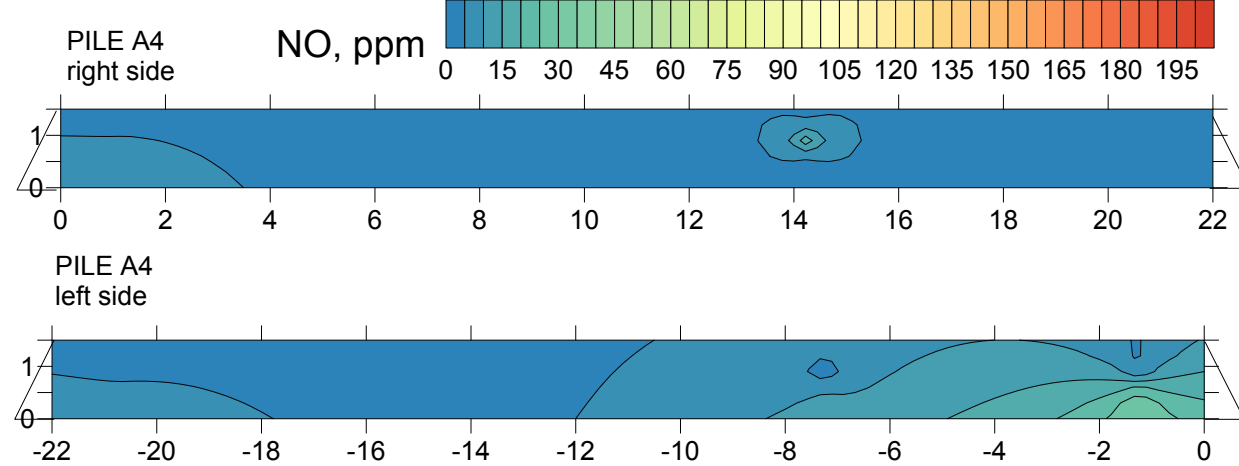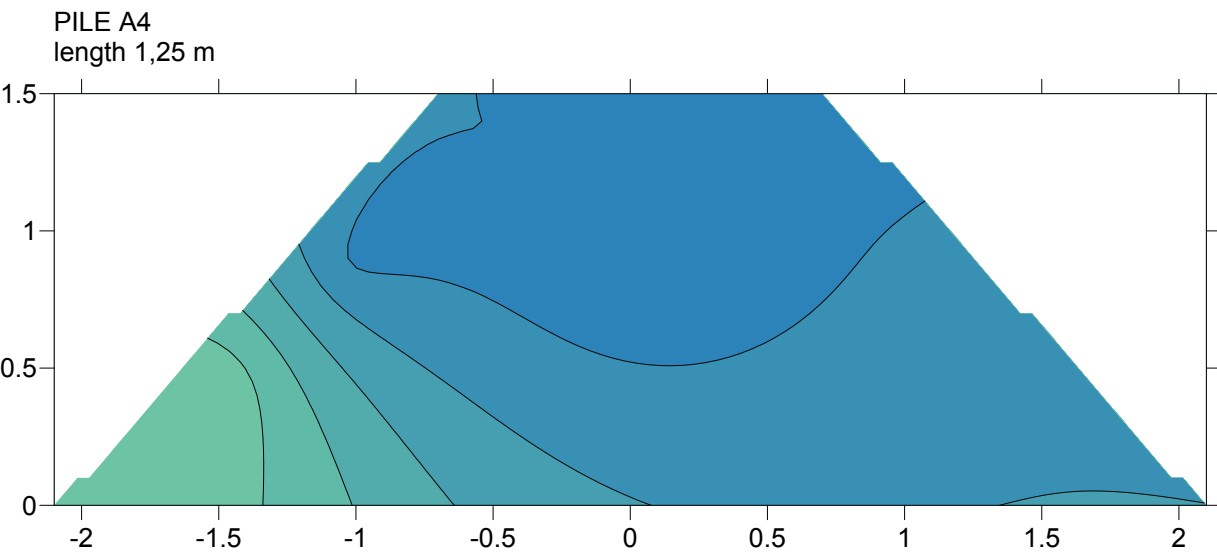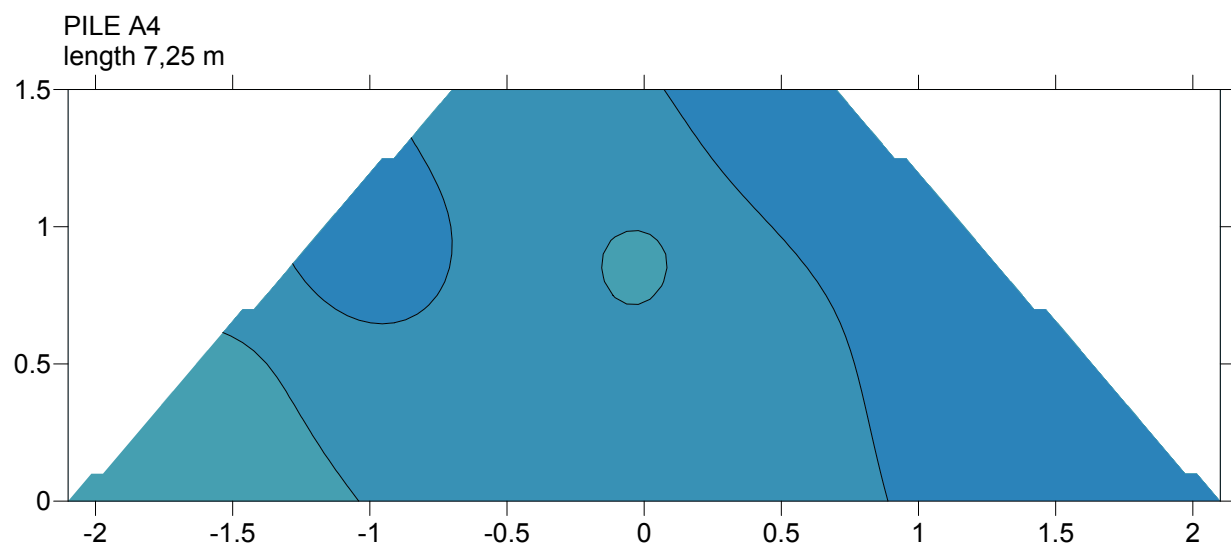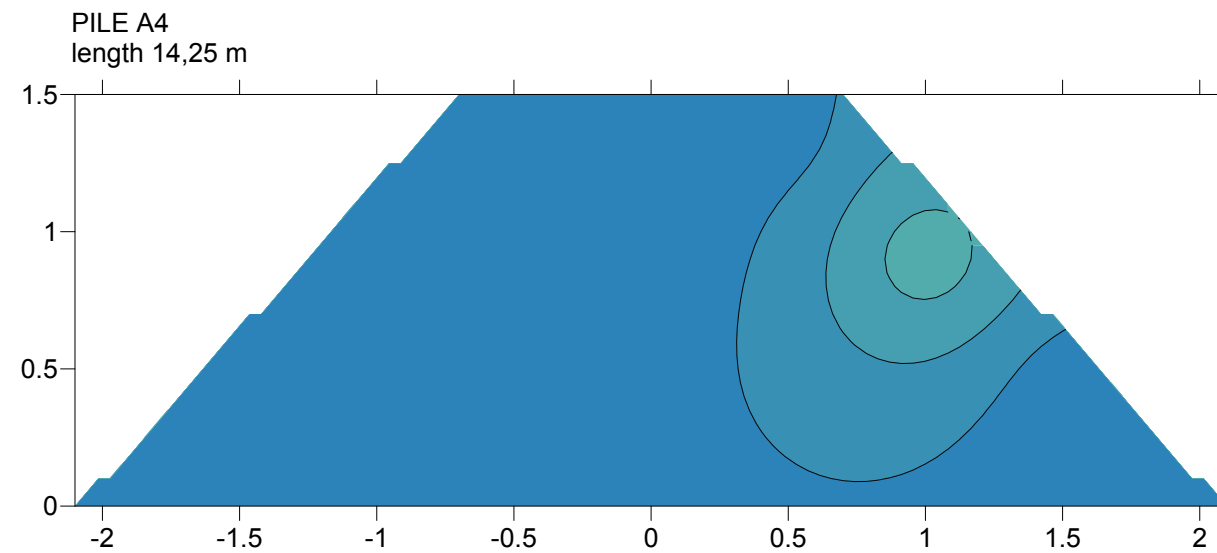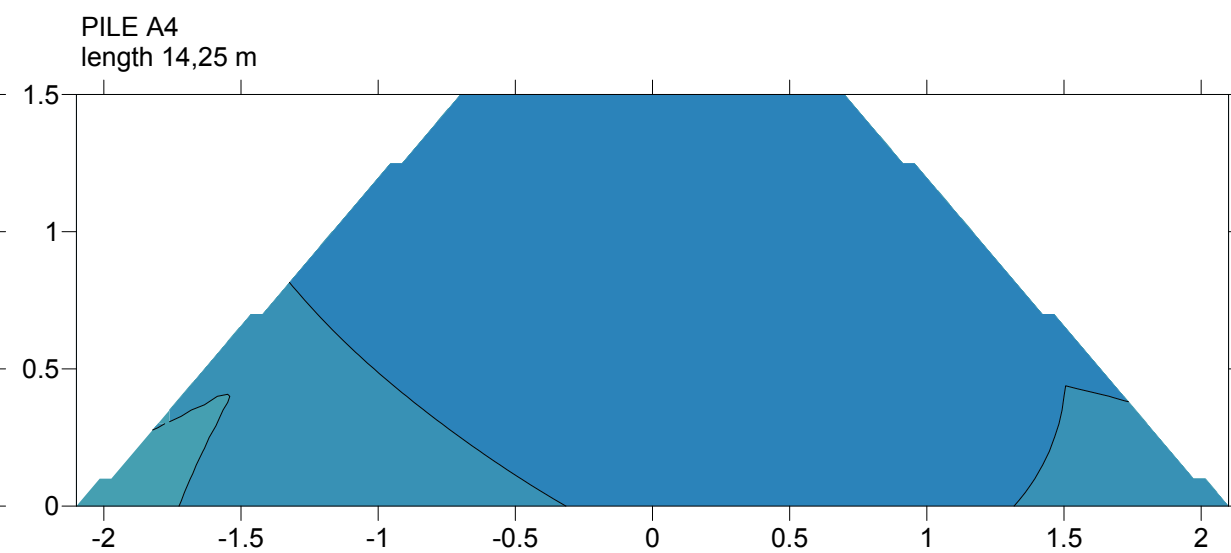

Supplement: s1 [file s1]

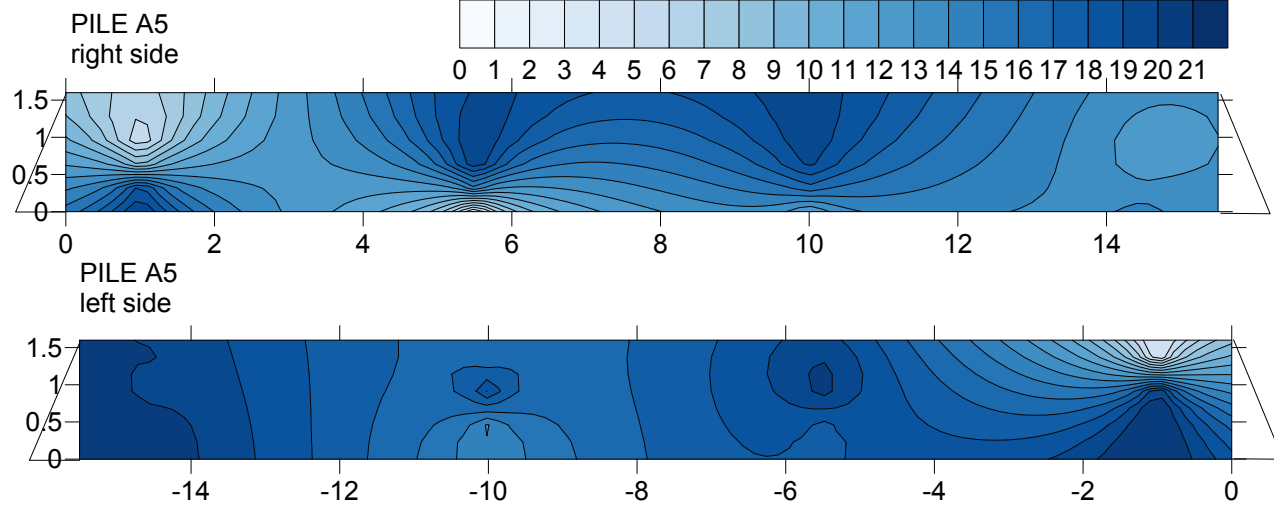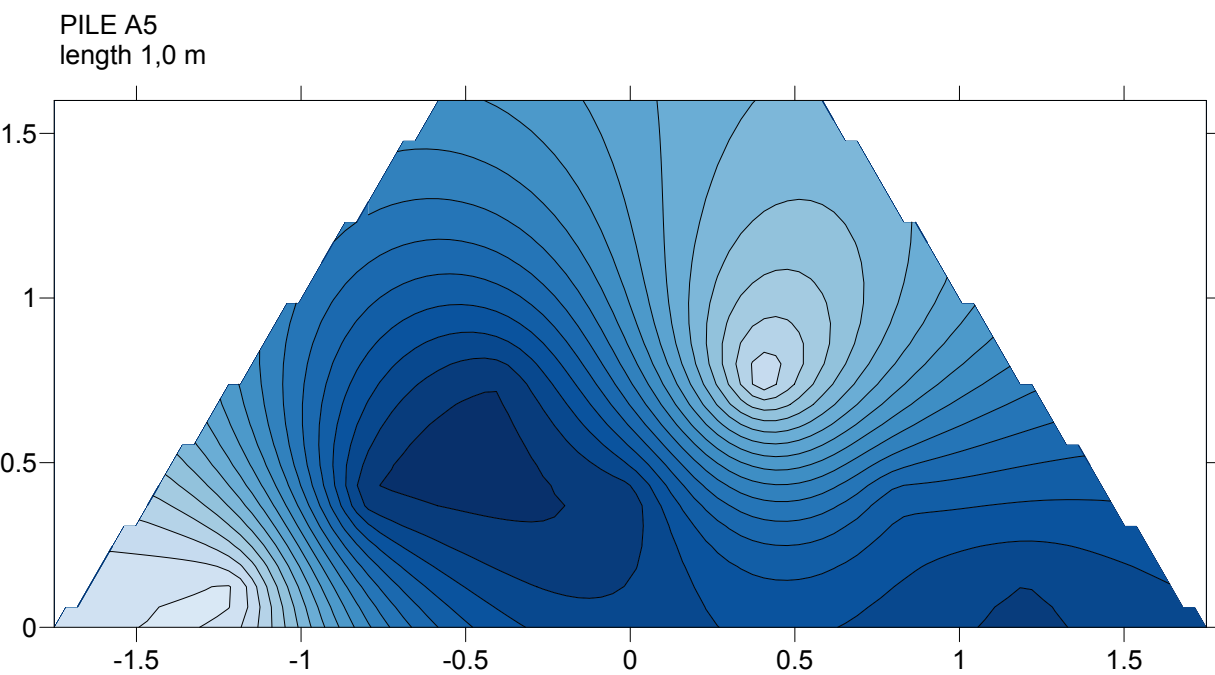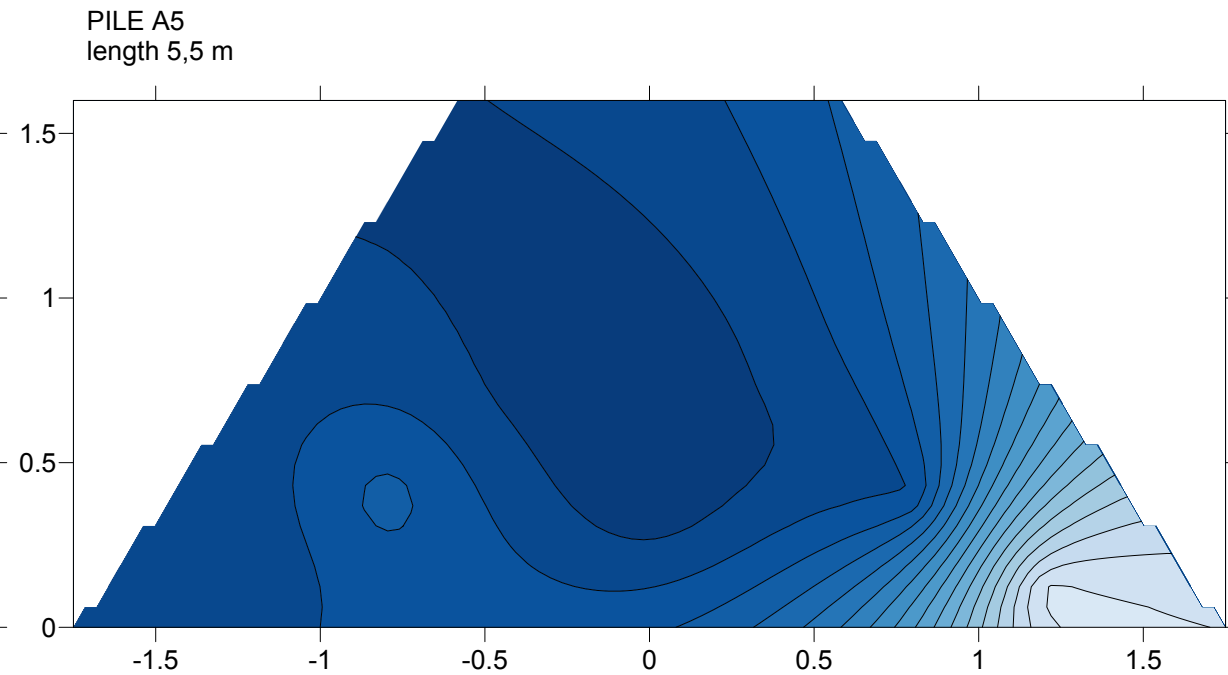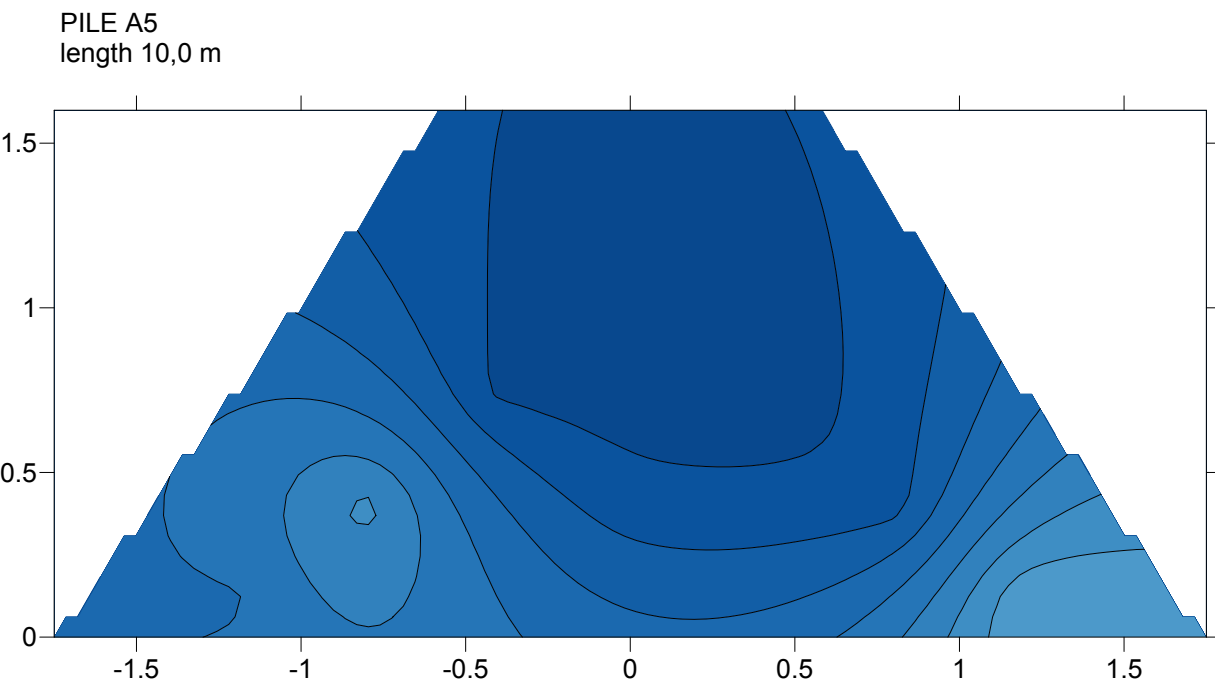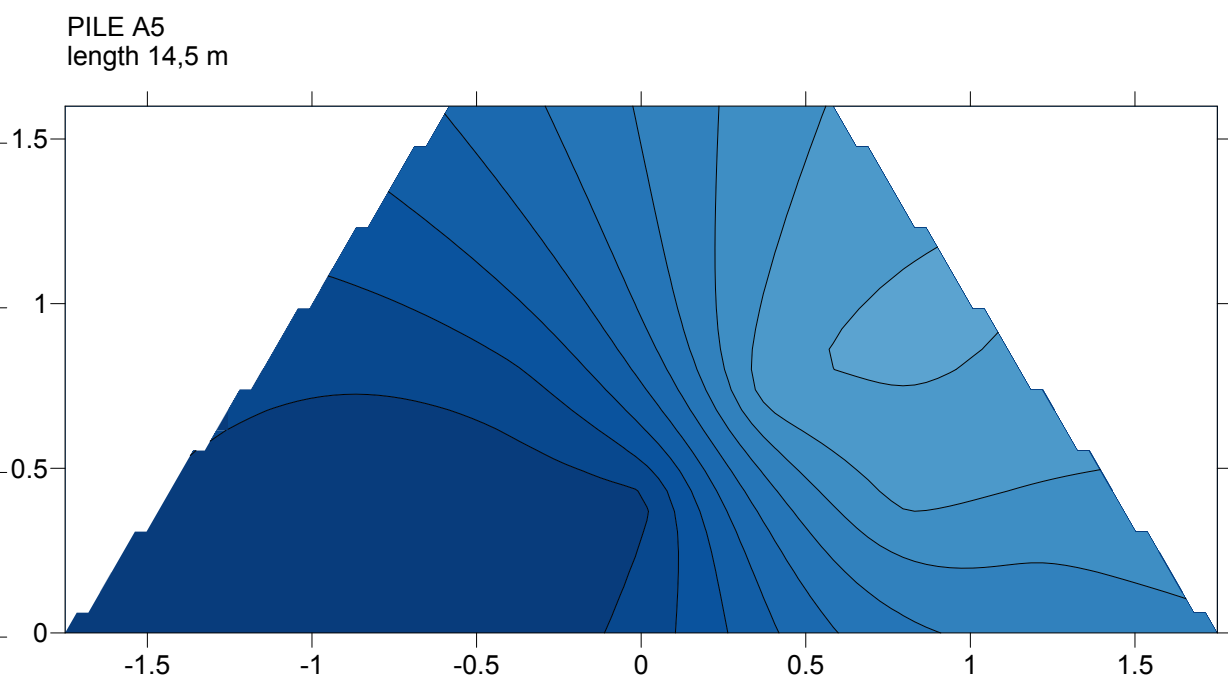

Supplement: s1 [file s1]

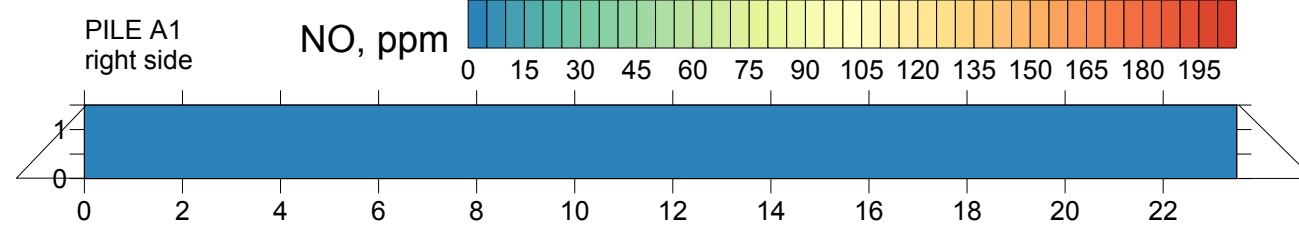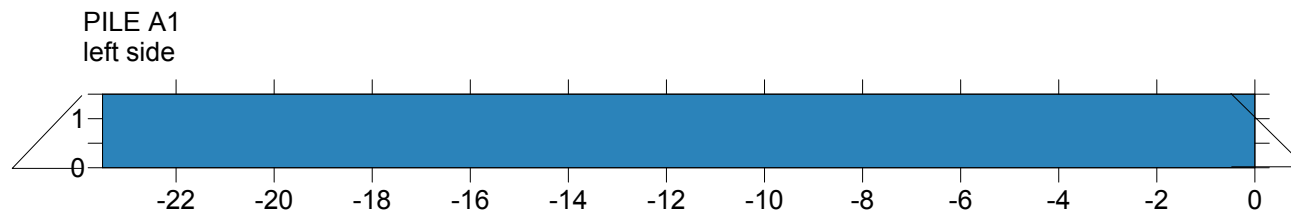

PILE A1  
length 1,5 m

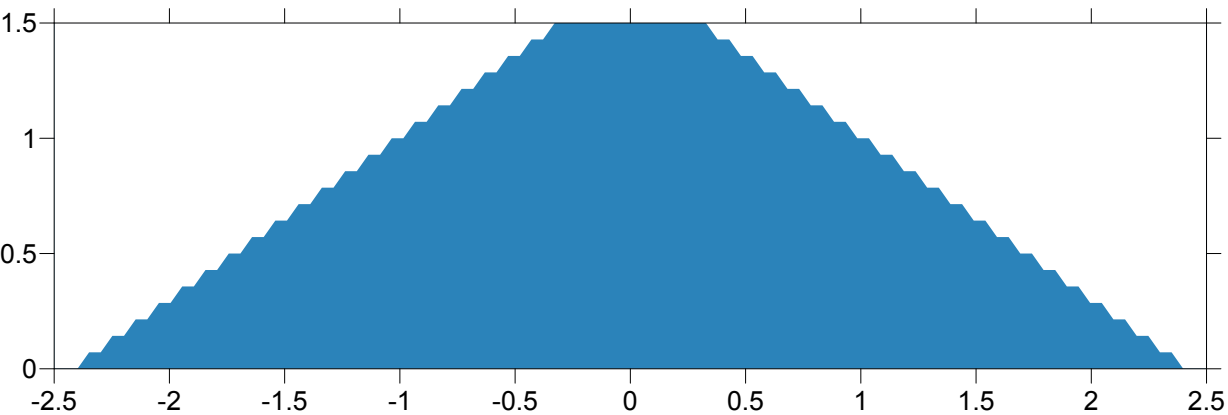

PILE A1  
length 8,5 m

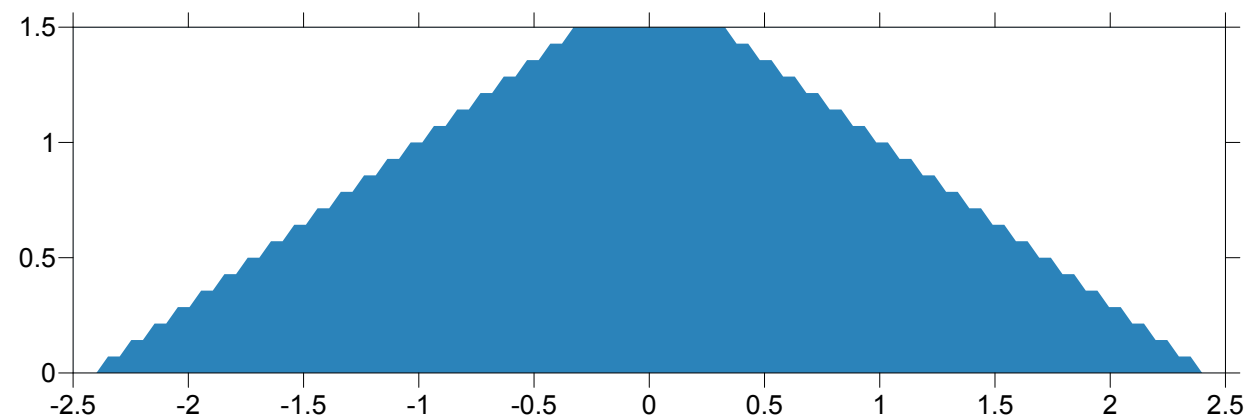

PILE A1  
length 15,5 m

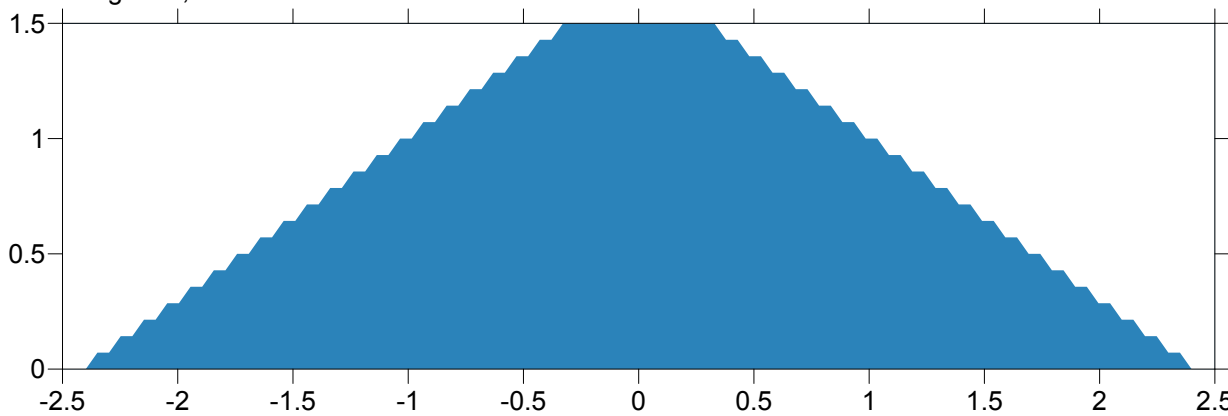

PILE A1  
length 22,5 m

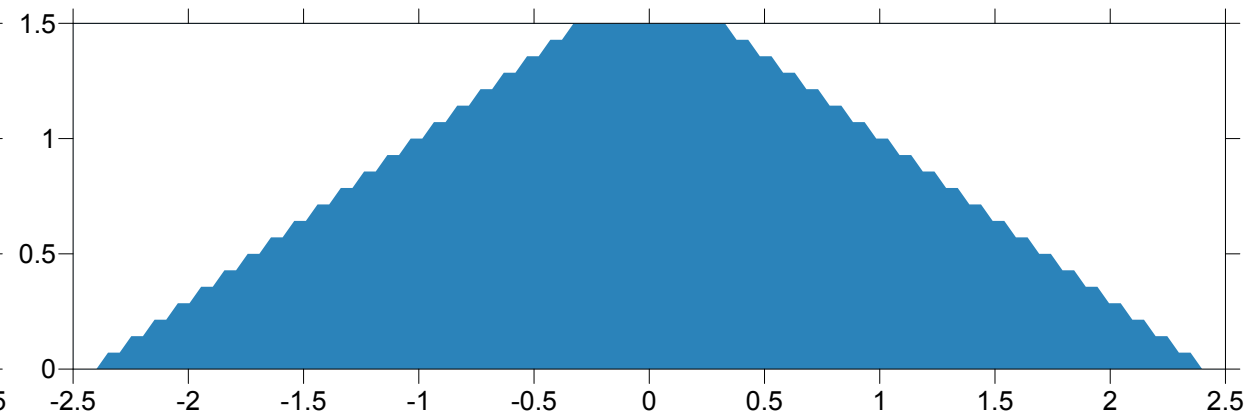

Supplement: s1 [file s1]

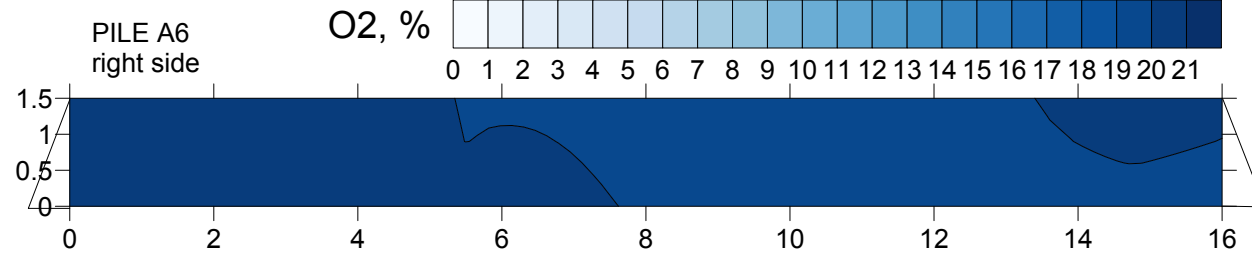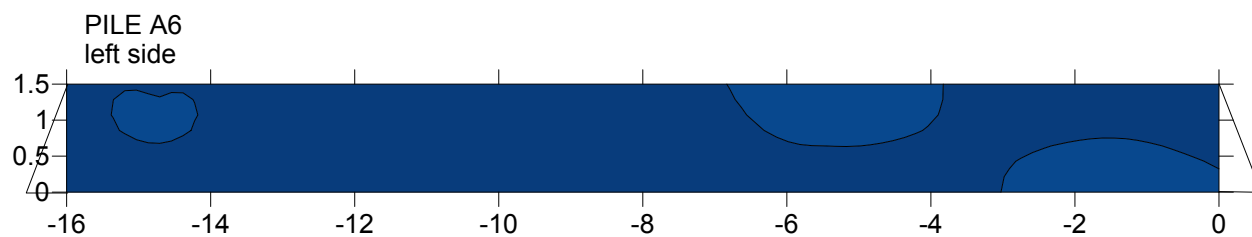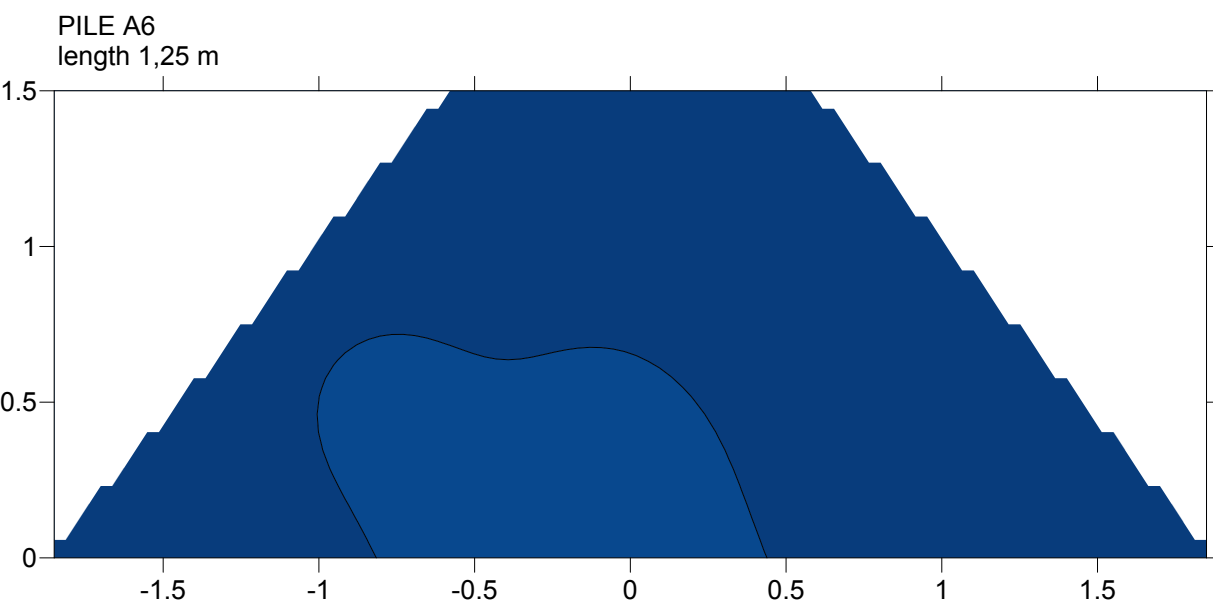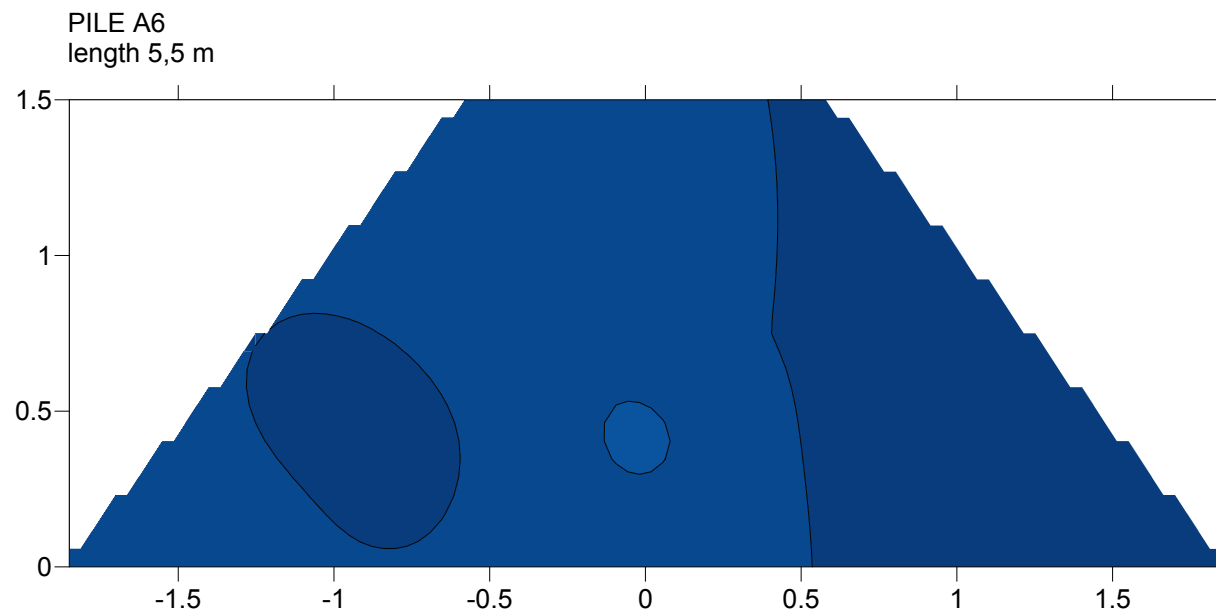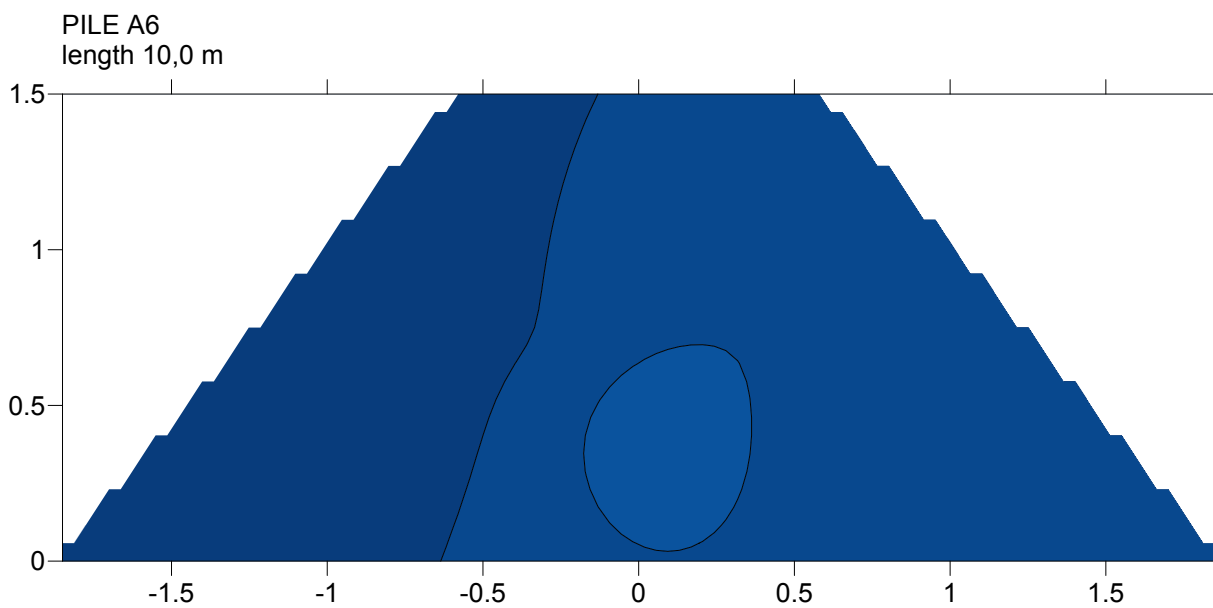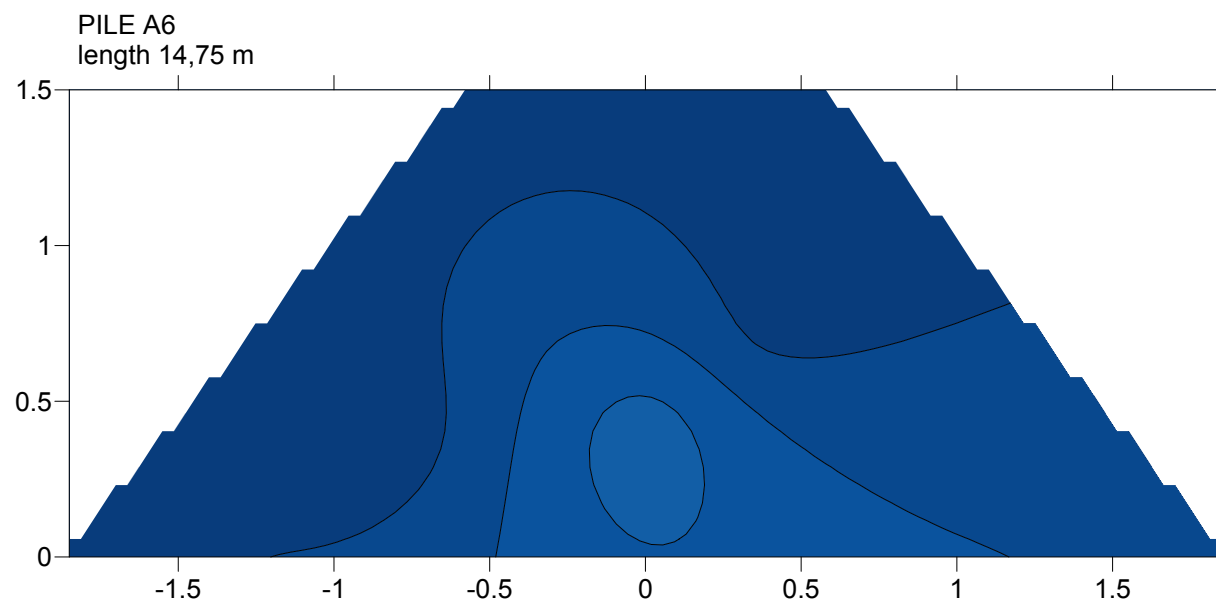

Supplement: s1 [file s1]

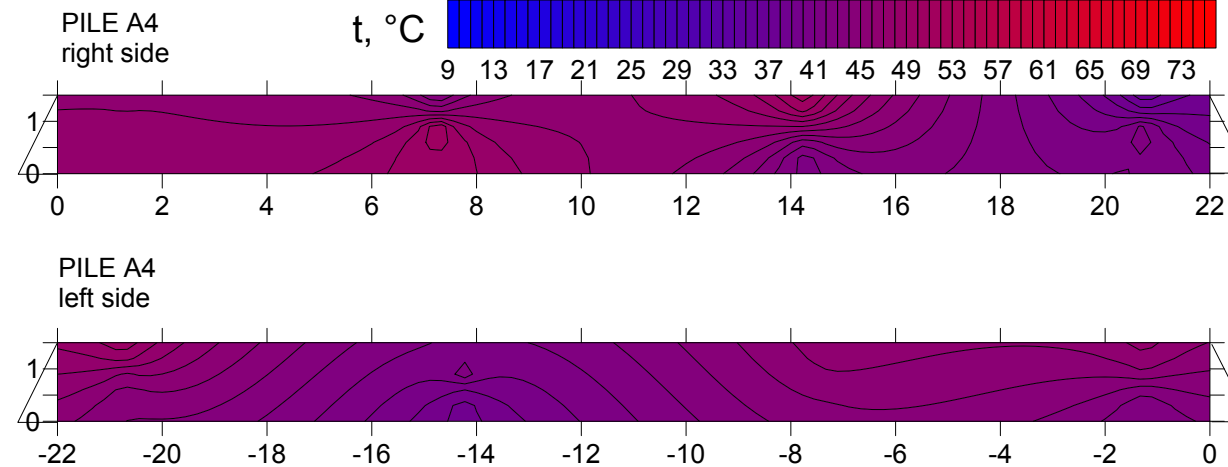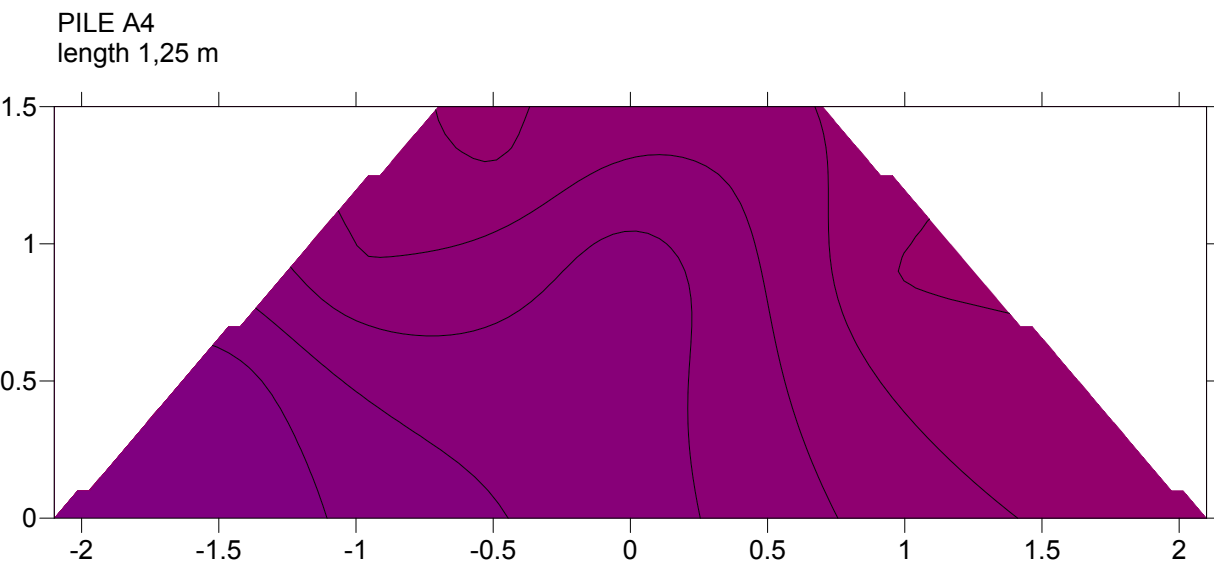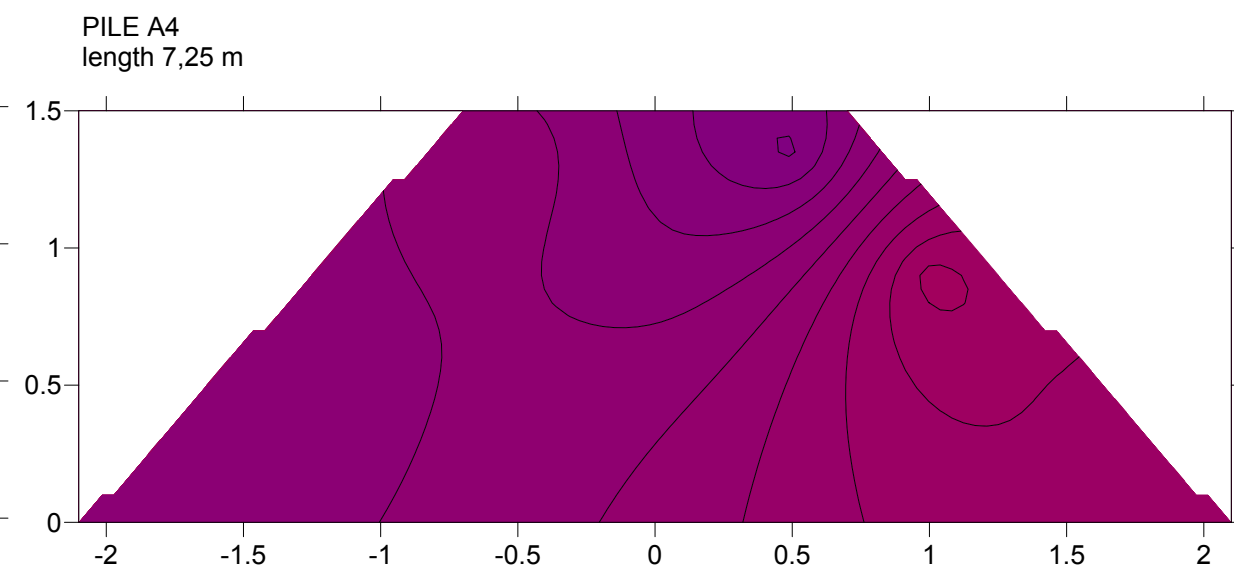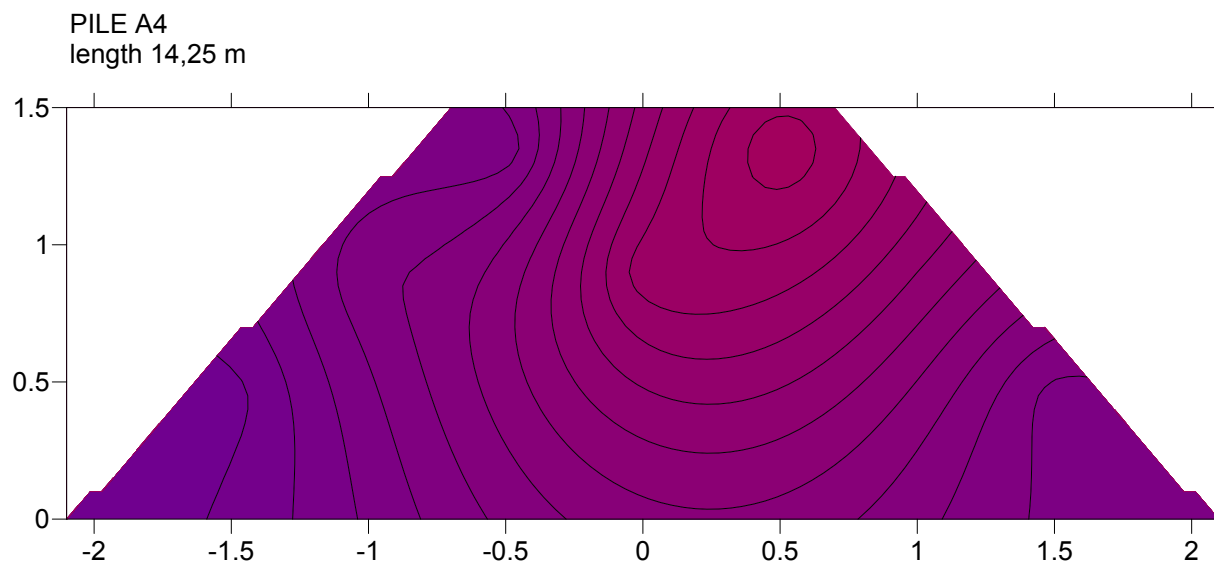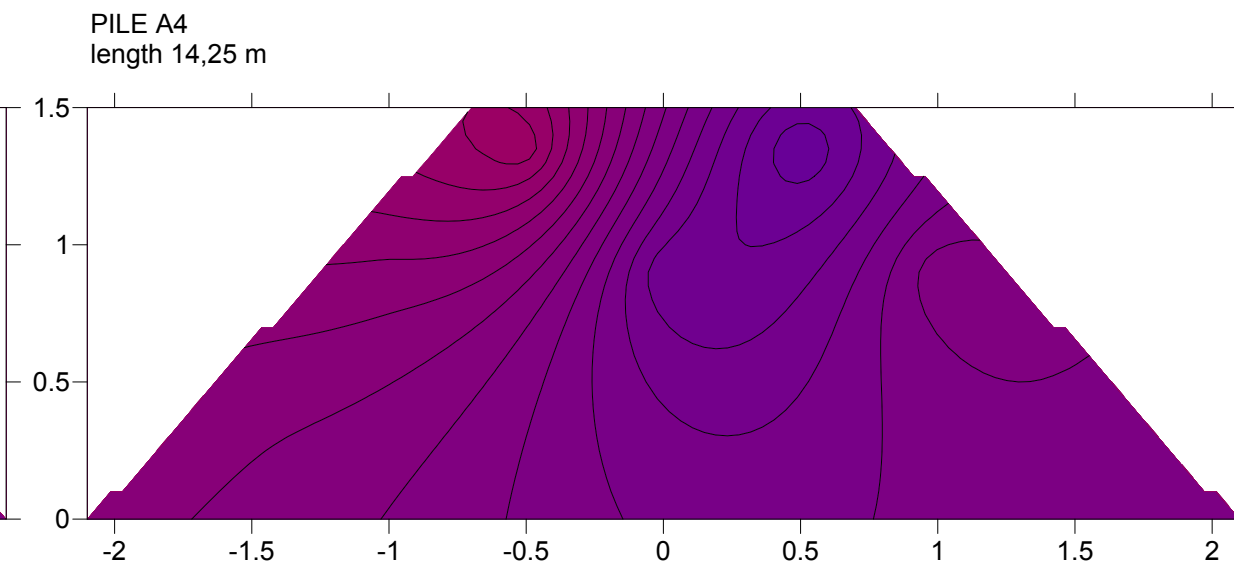

Supplement: s1 [file s1]

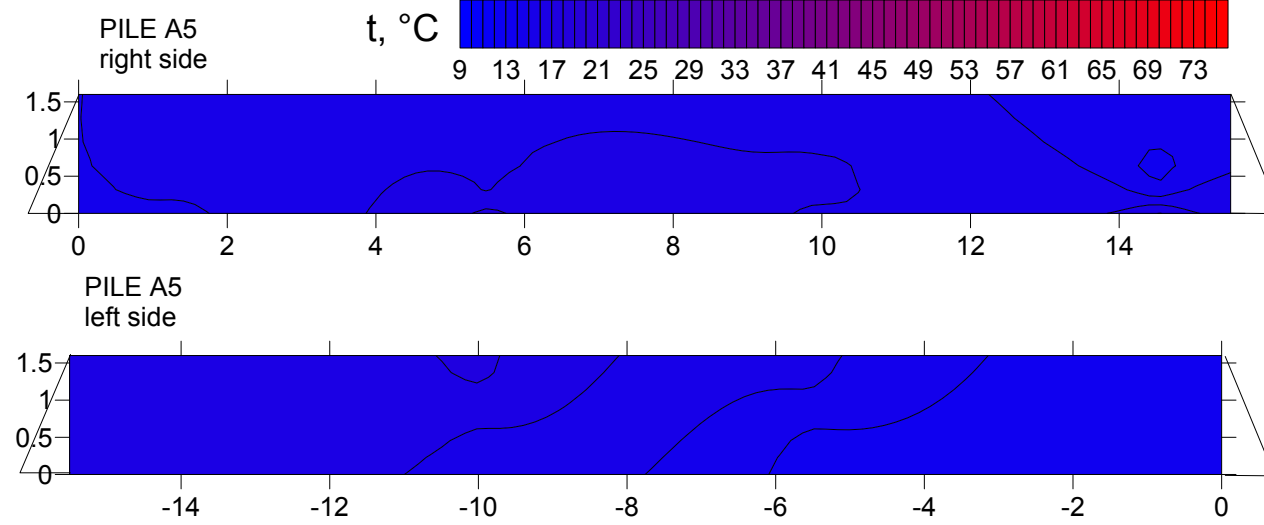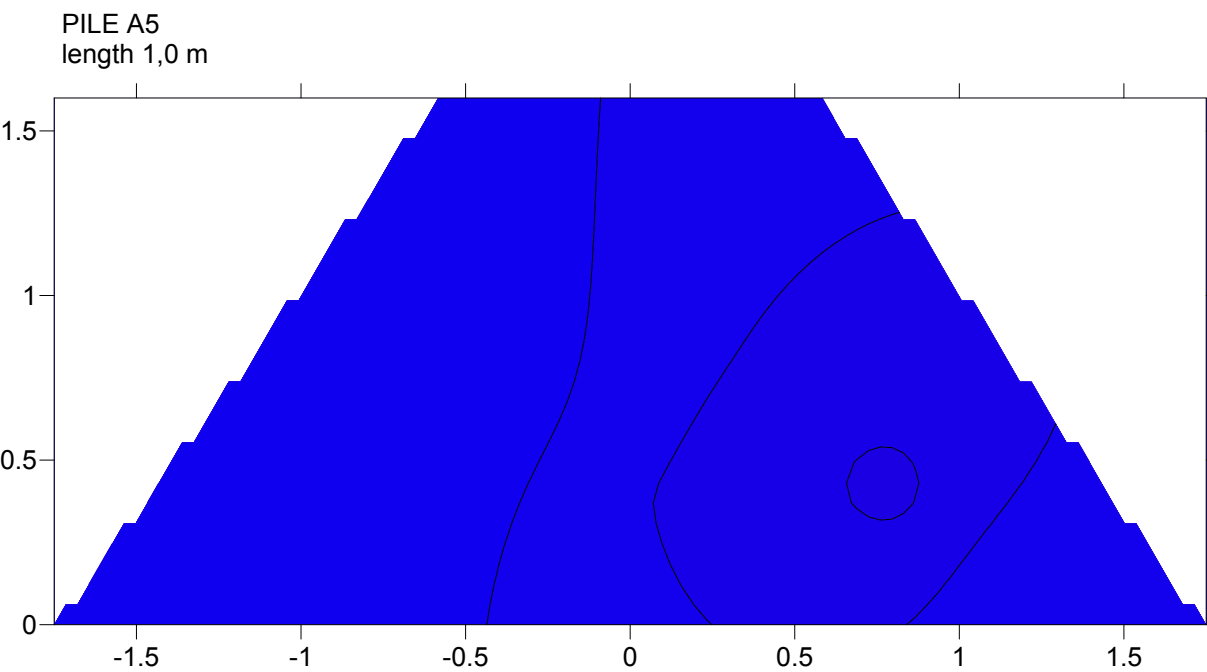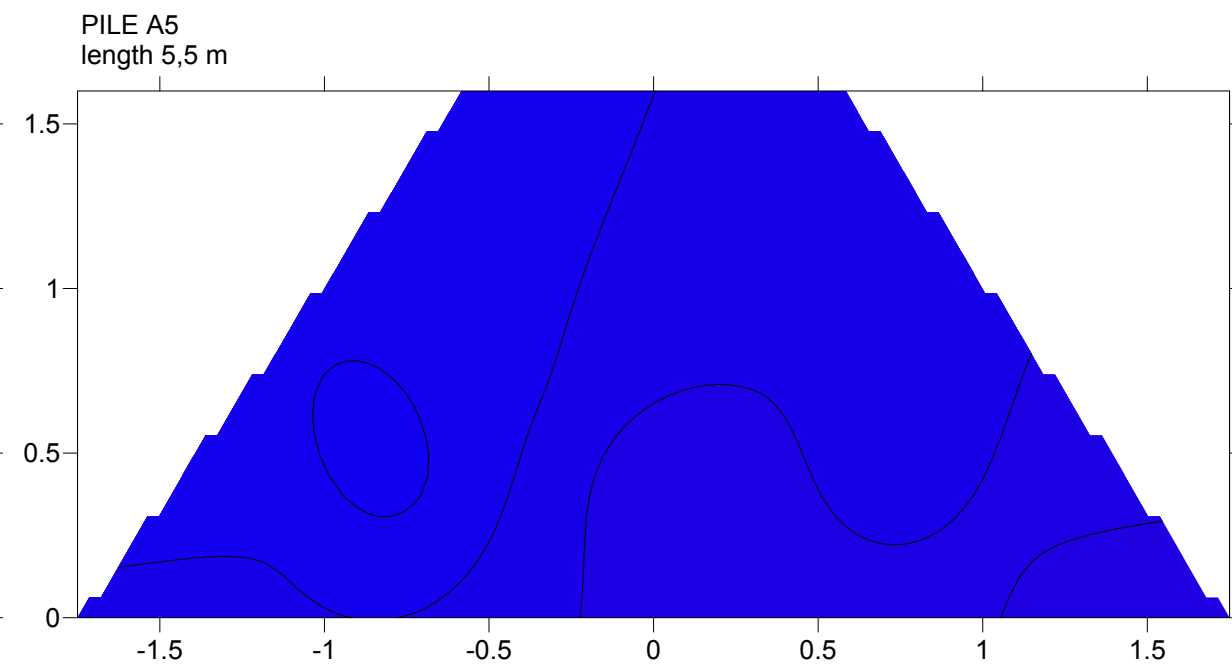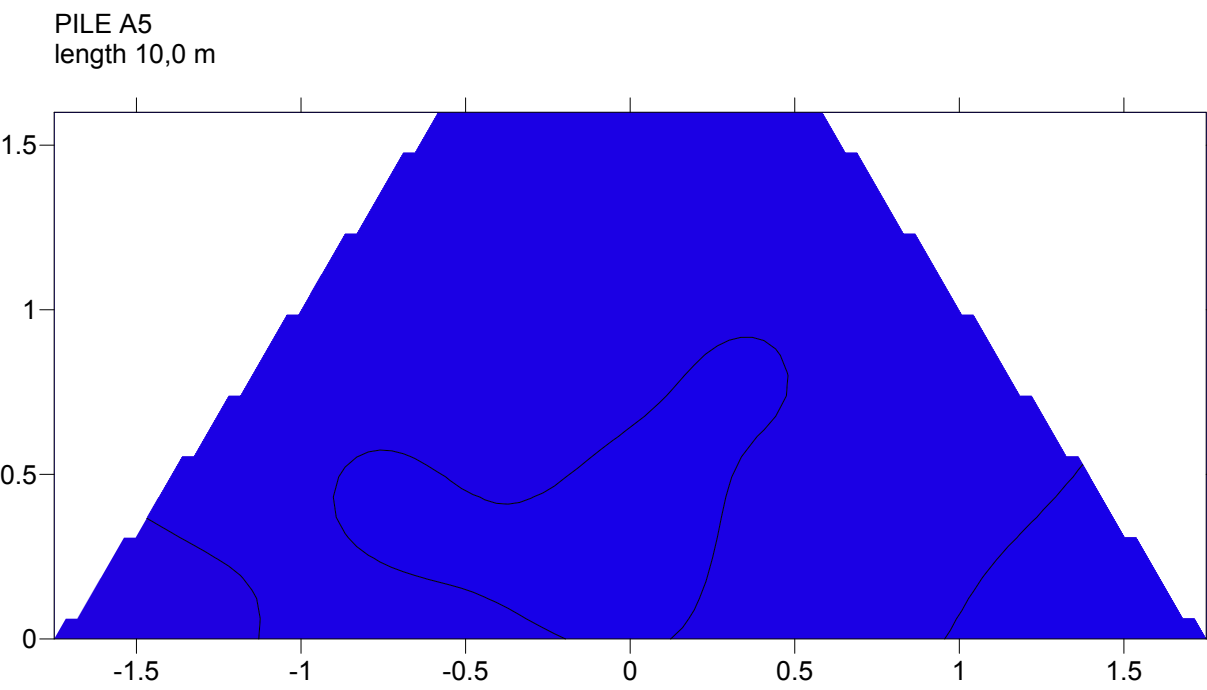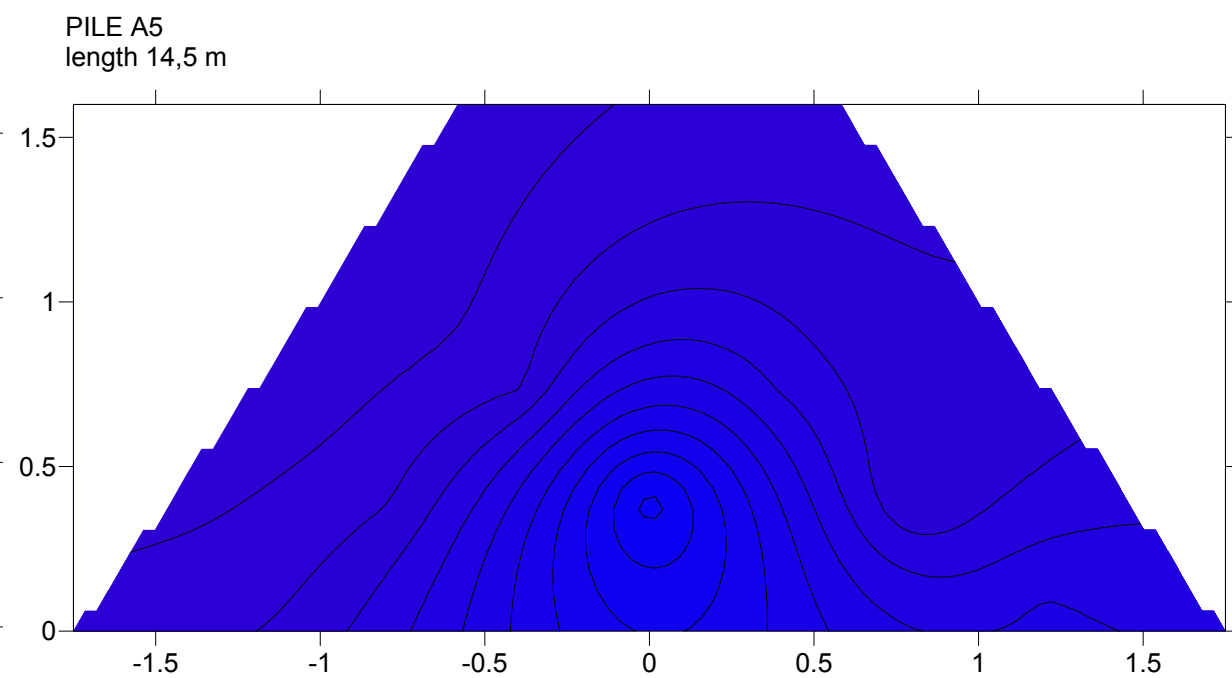

Supplement: s1 [file s1]

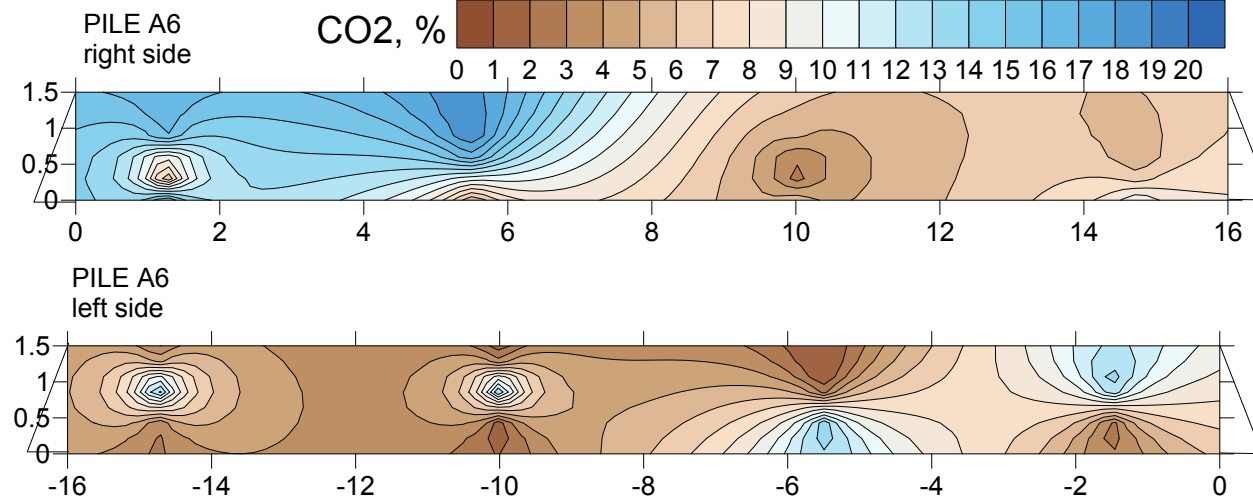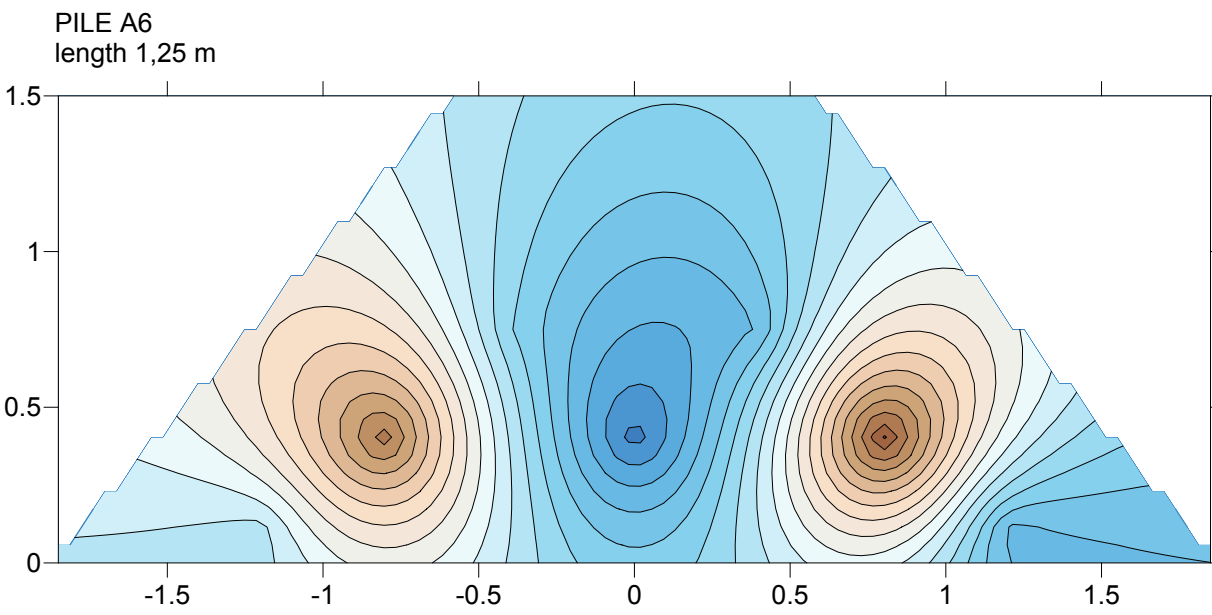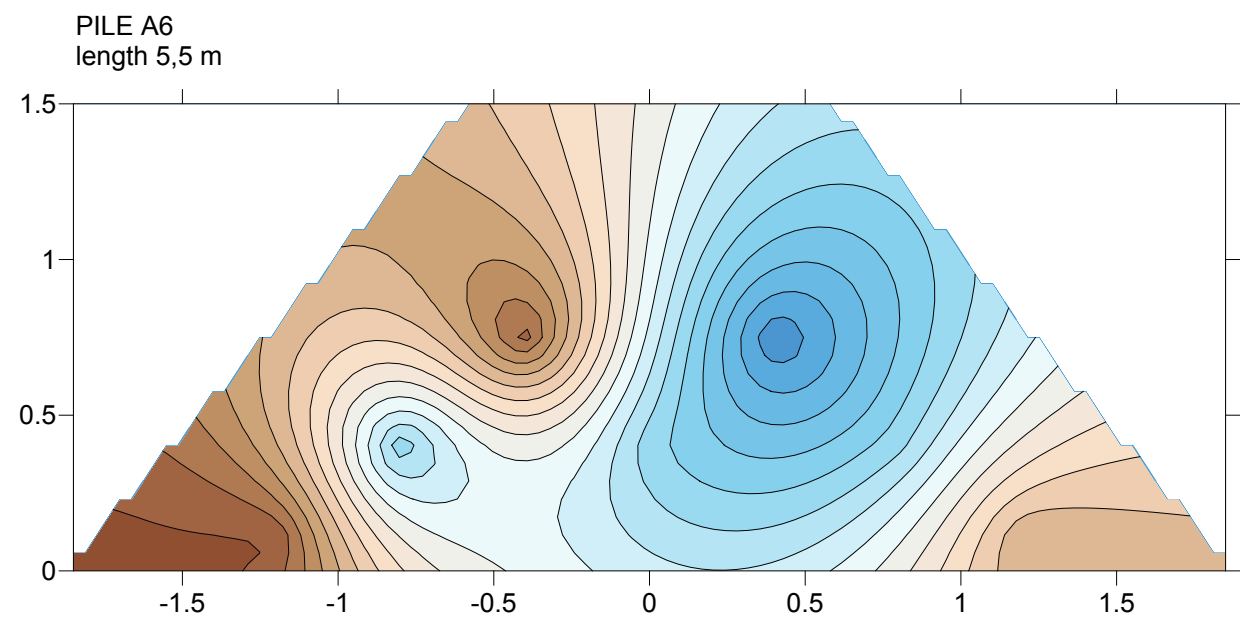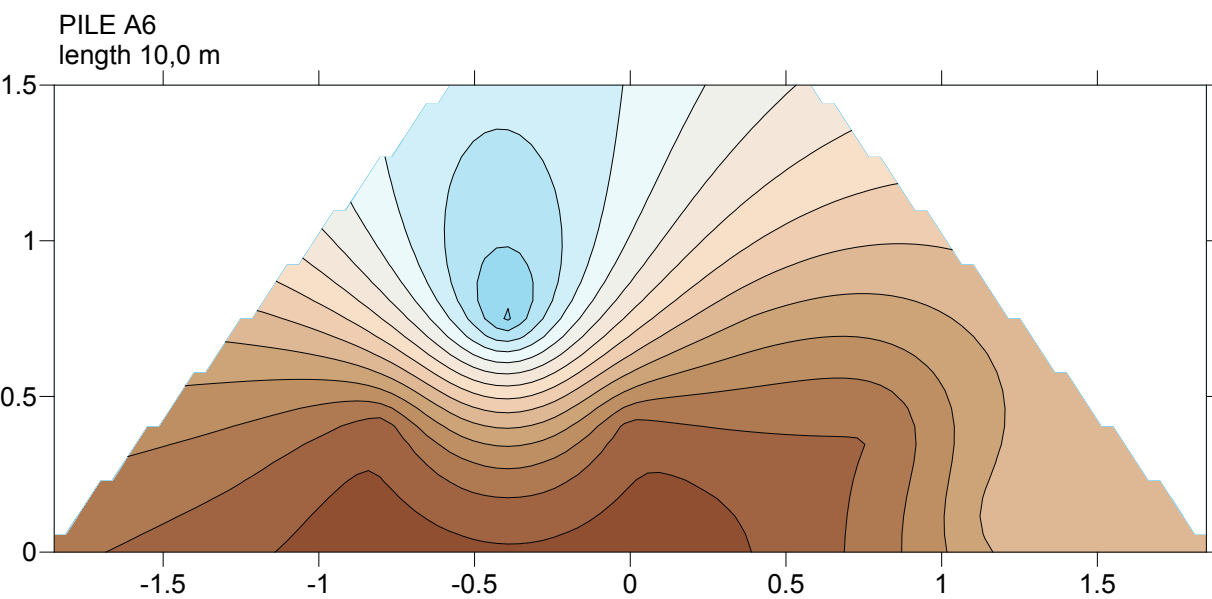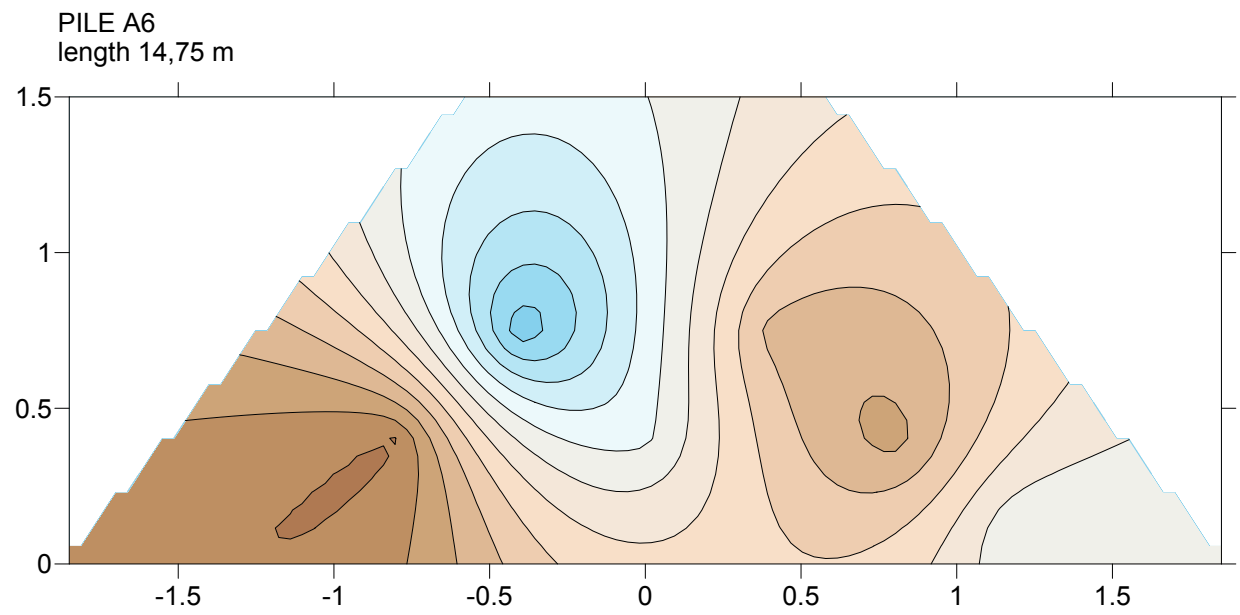

Supplement: s1 [file s1]

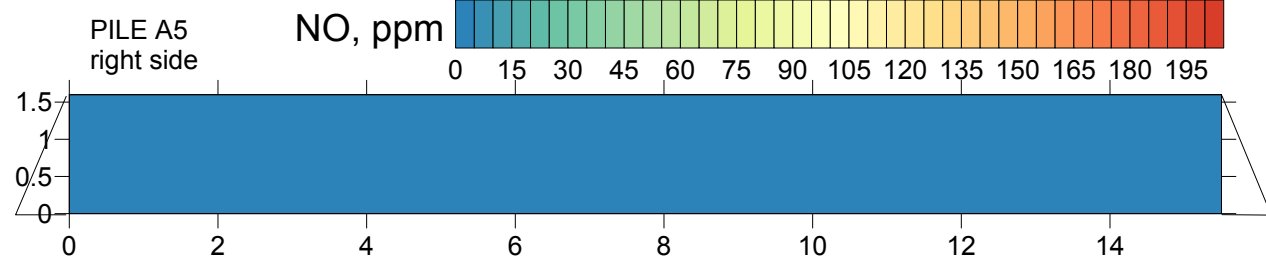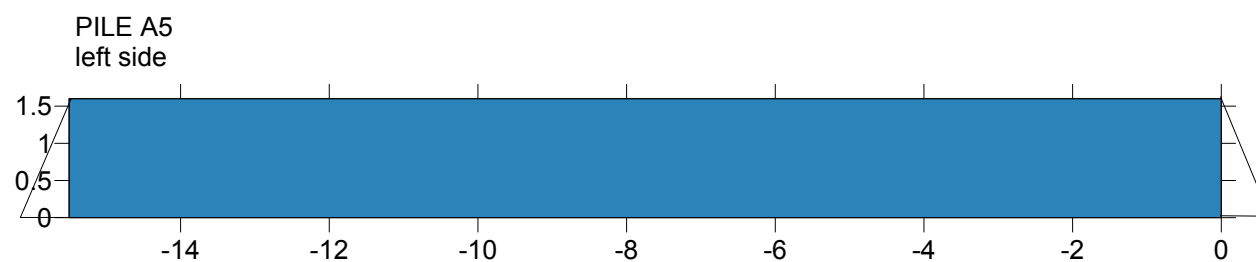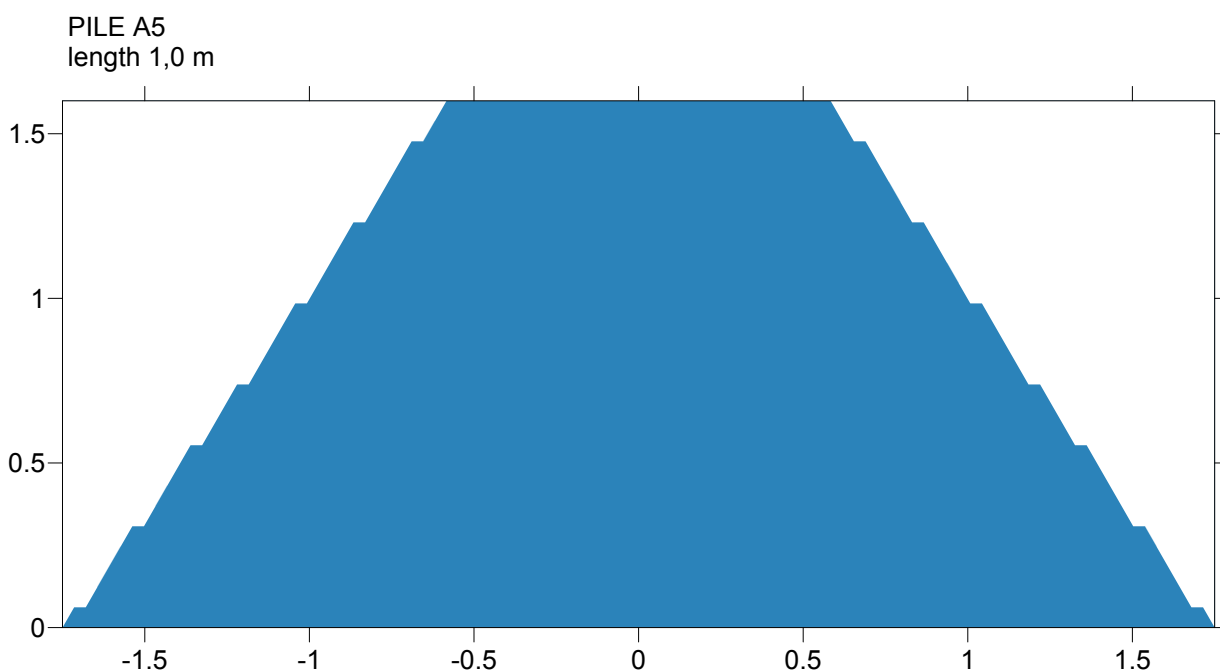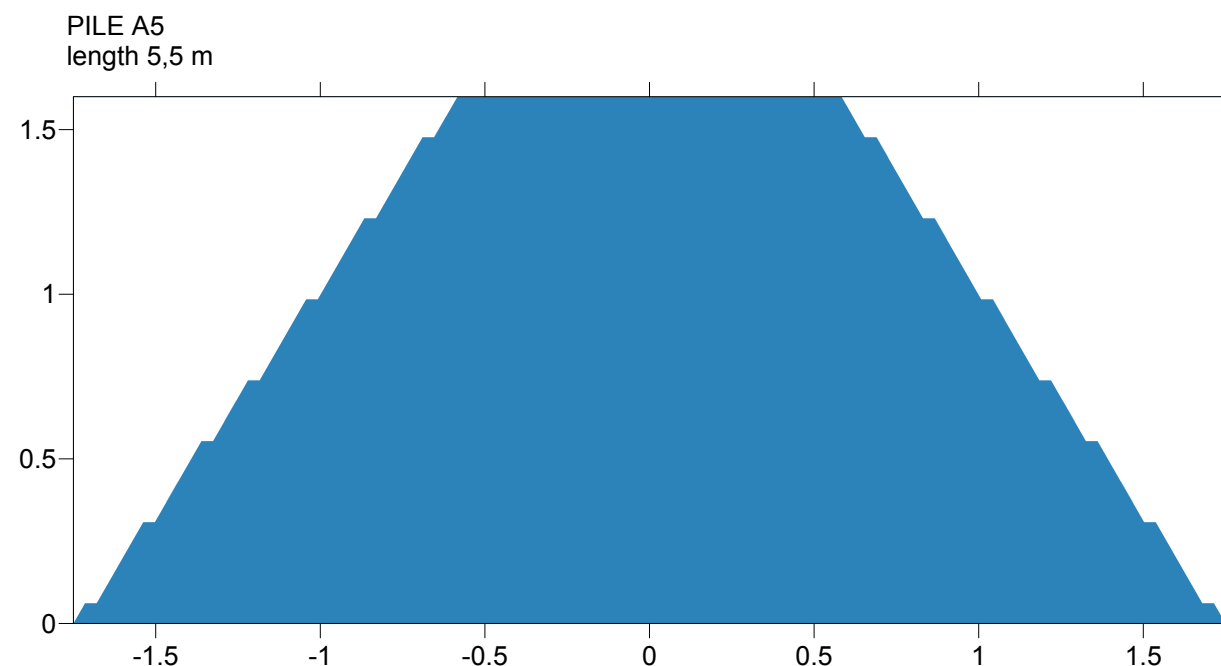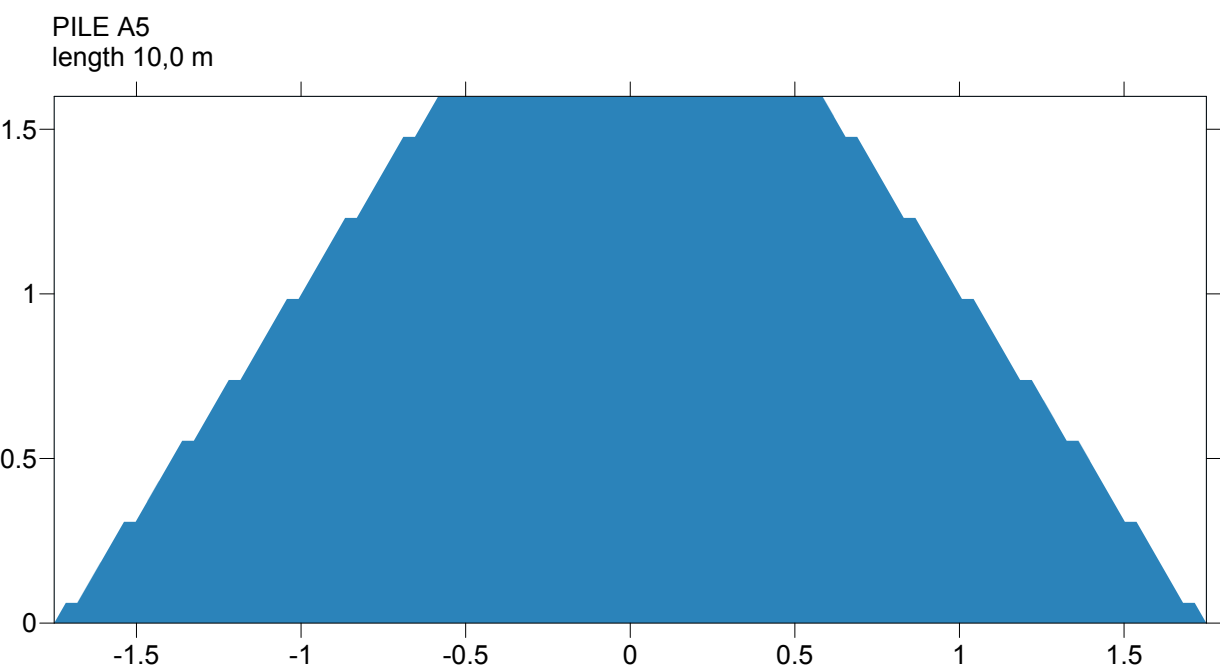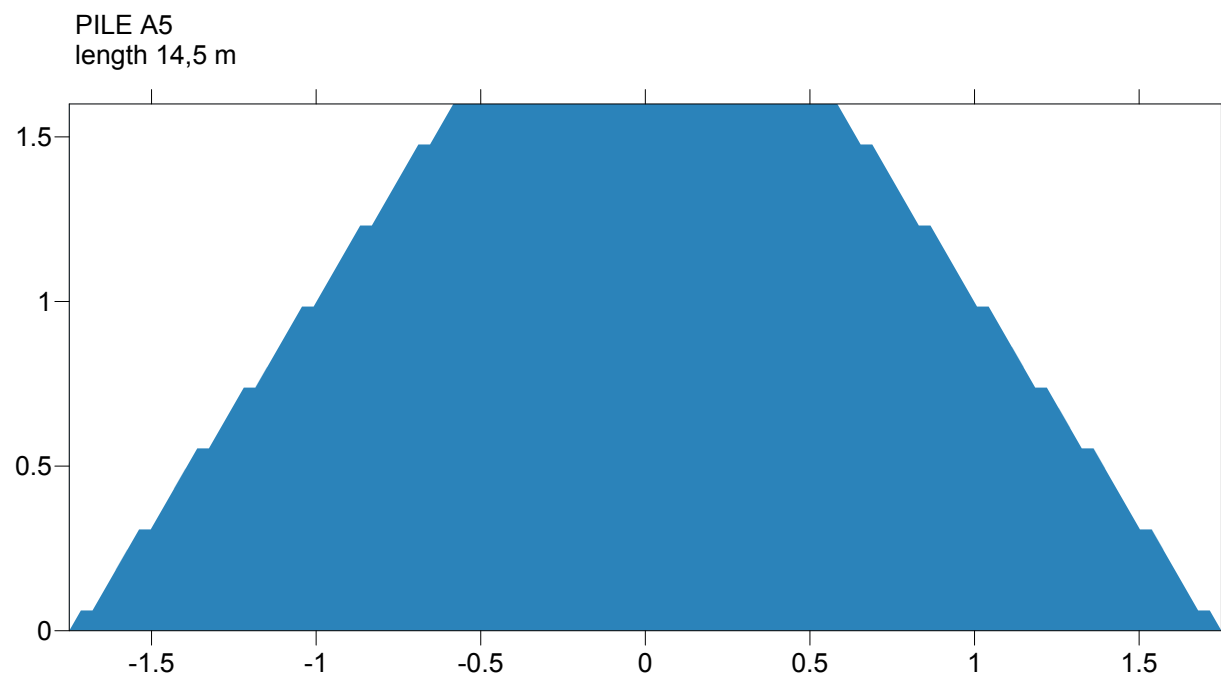

Supplement: s1 [file s1]

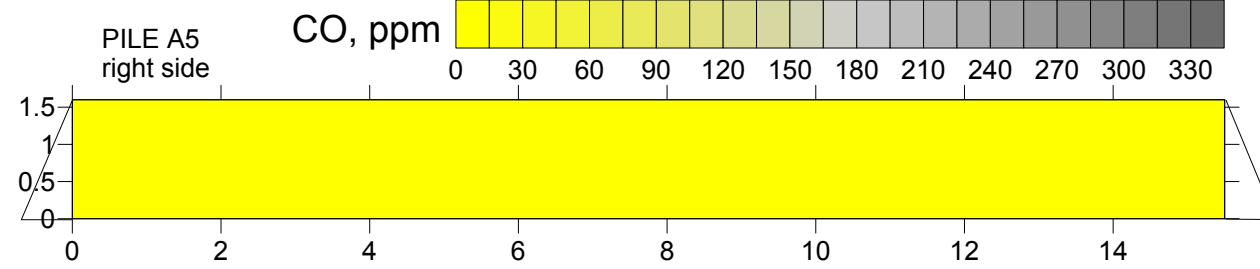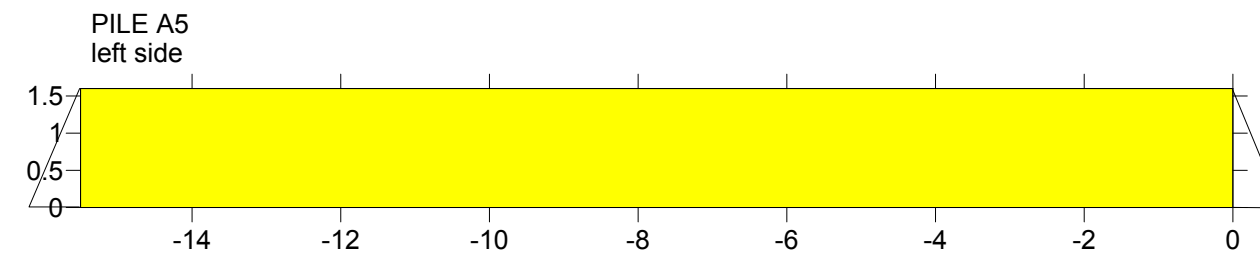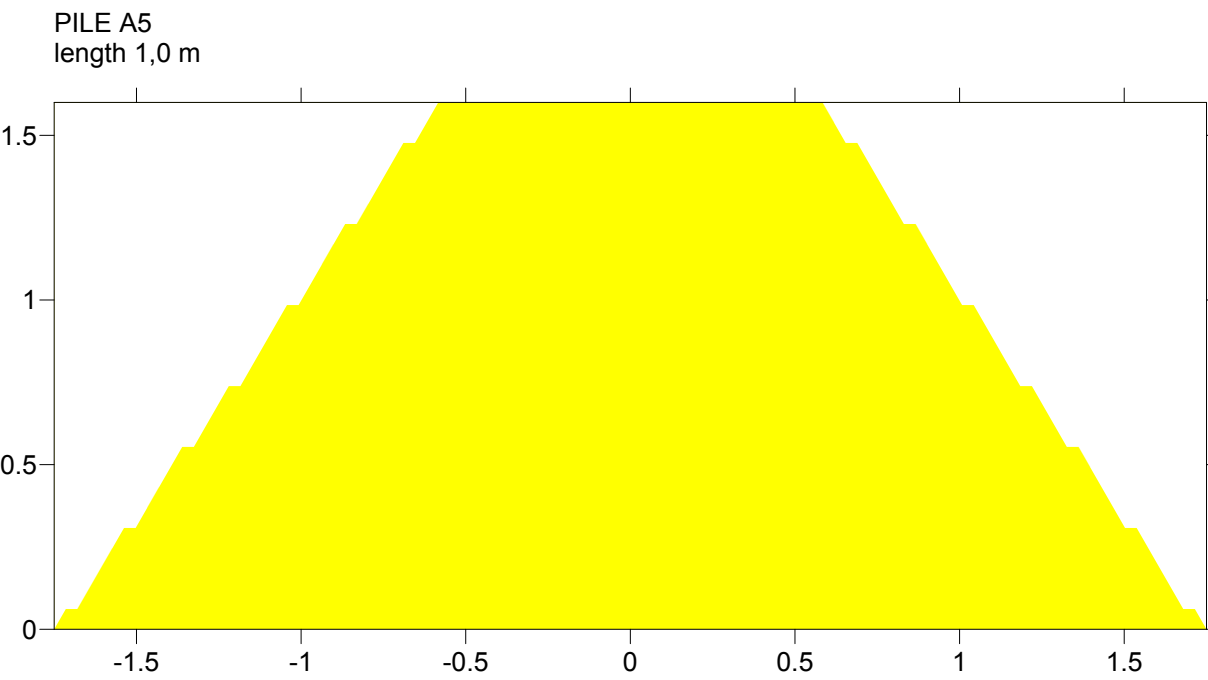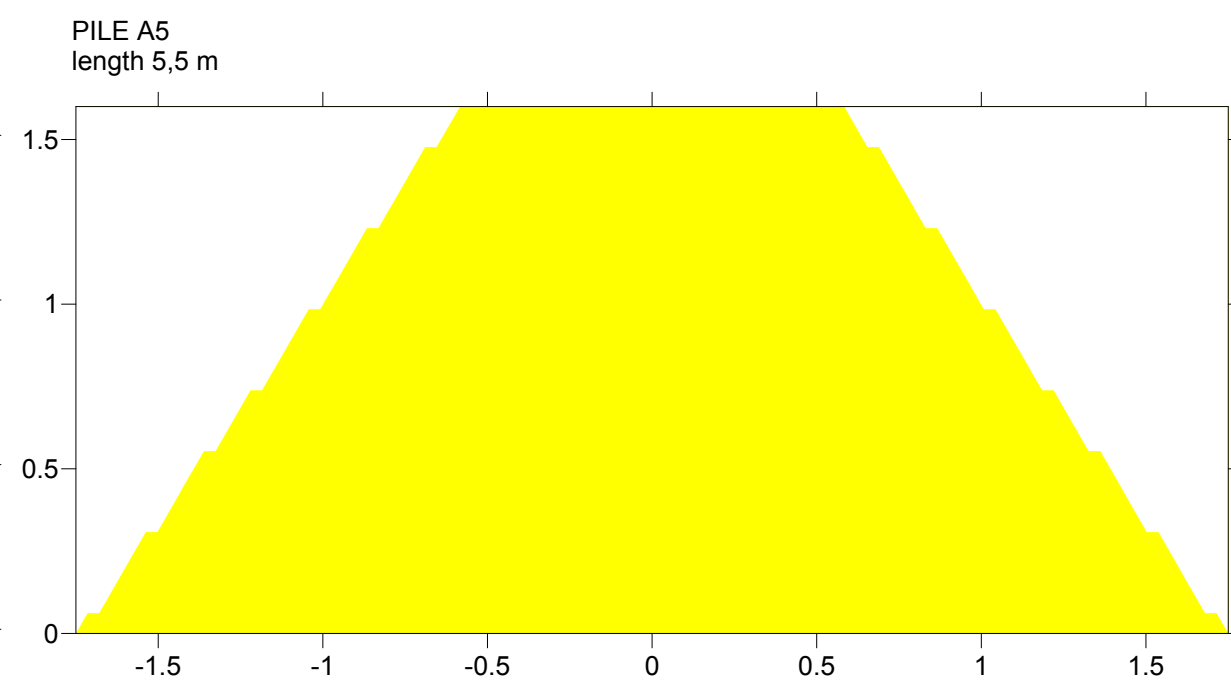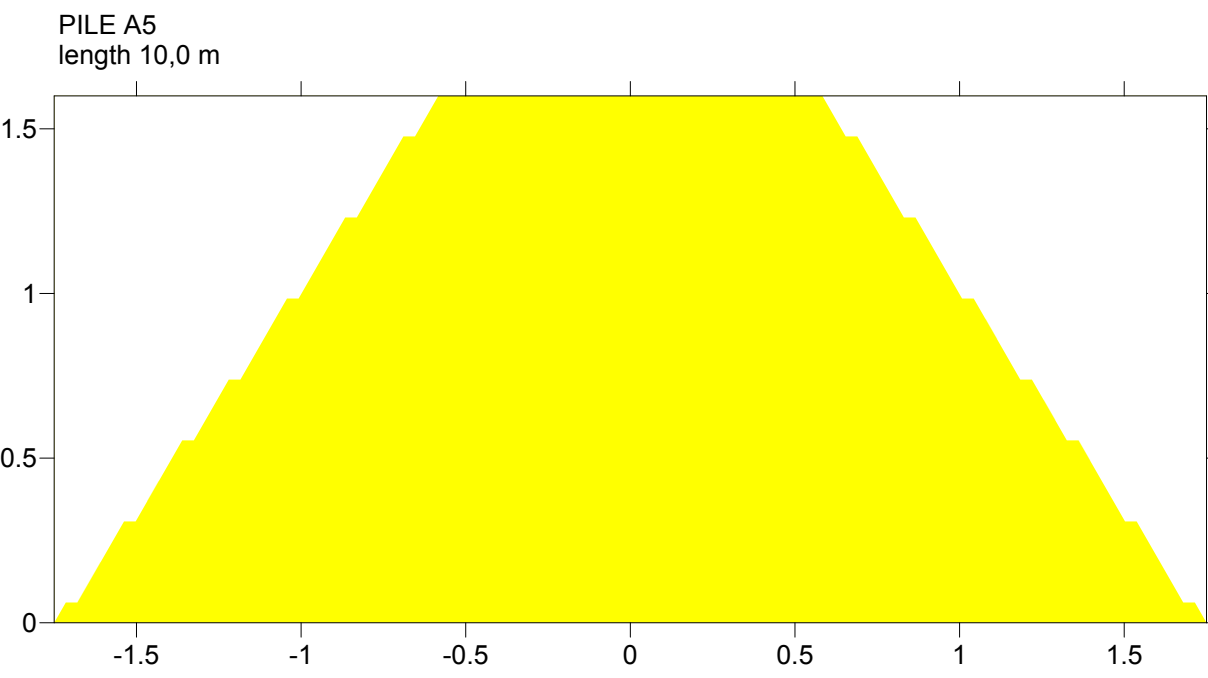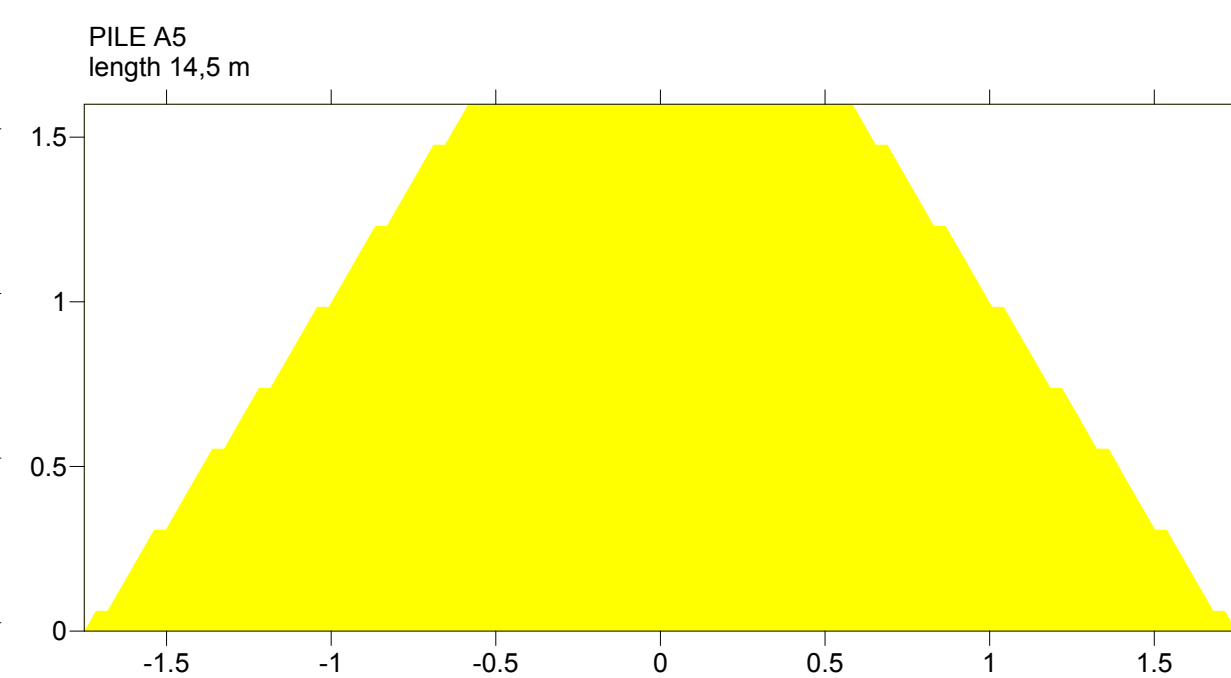

Supplement: s1 [file s1]

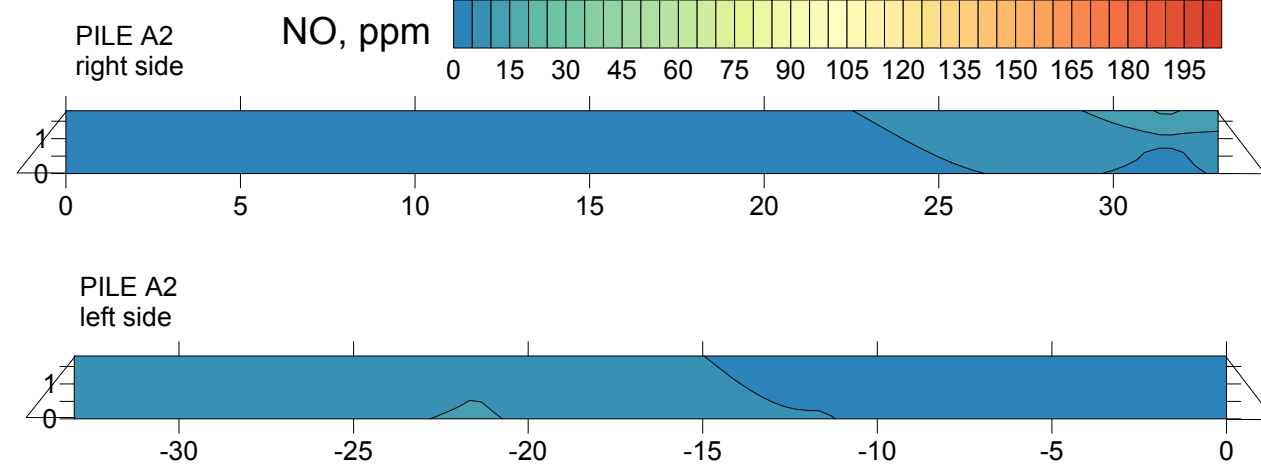

PILE A2  
length 1,5 m

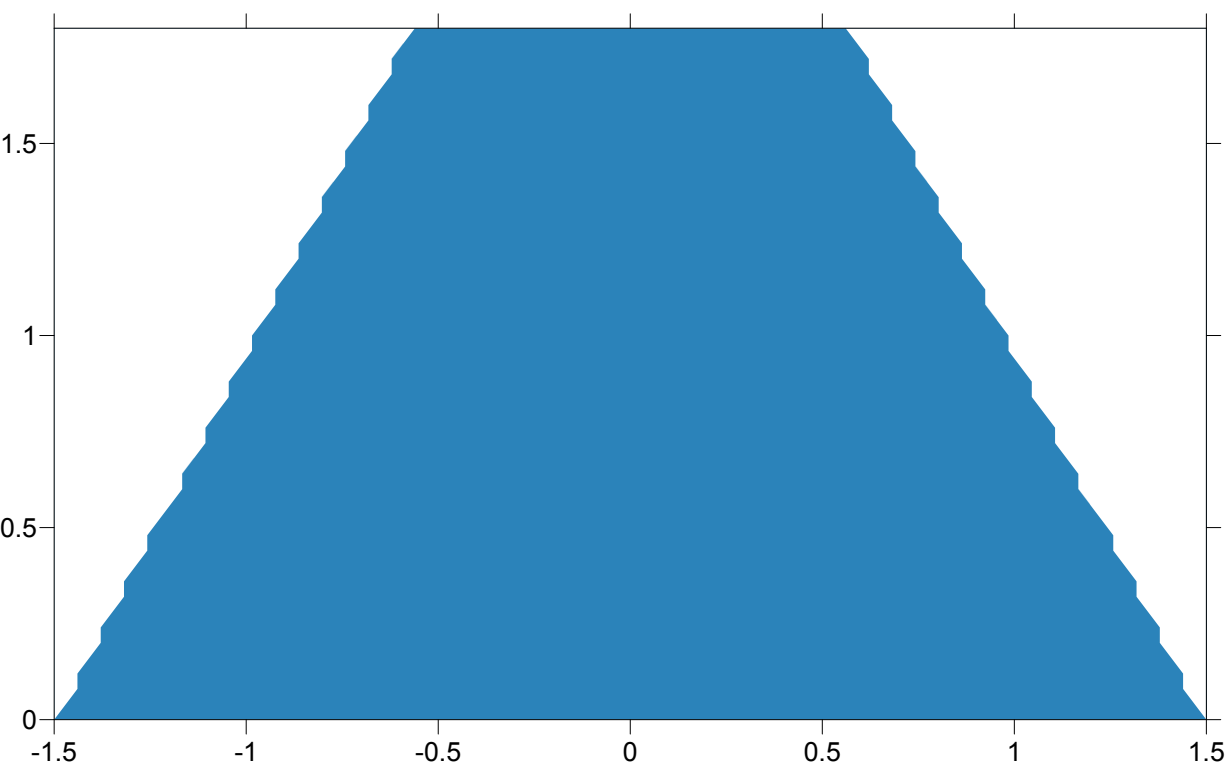

PILE A2  
length 11,5 m

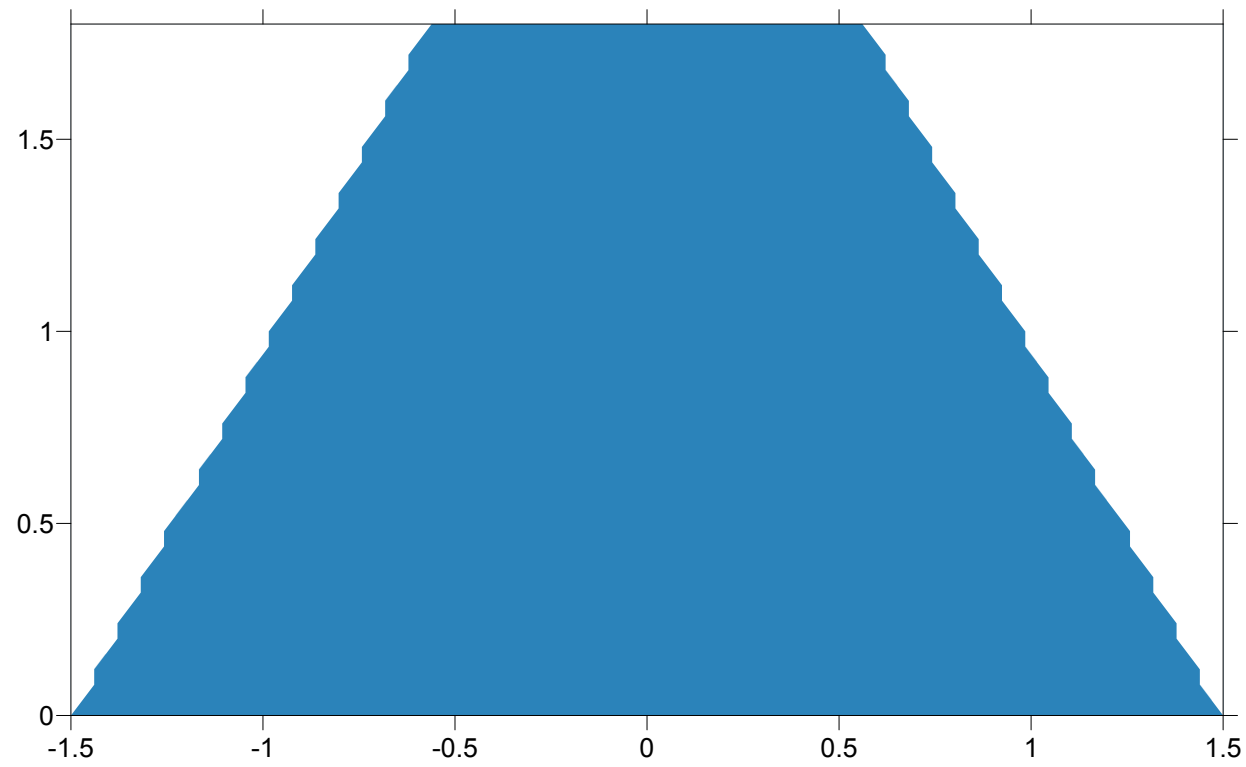

PILE A2  
length 21,5 m

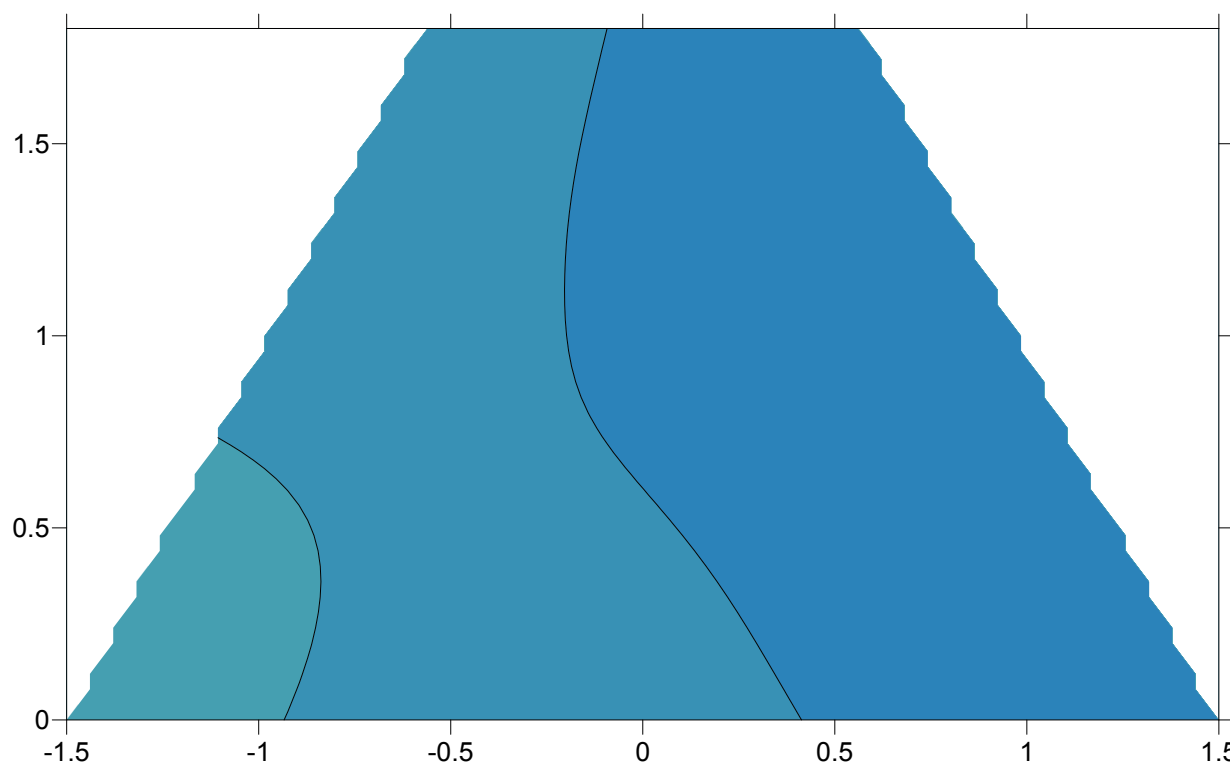

PILE A2  
length 31,5 m

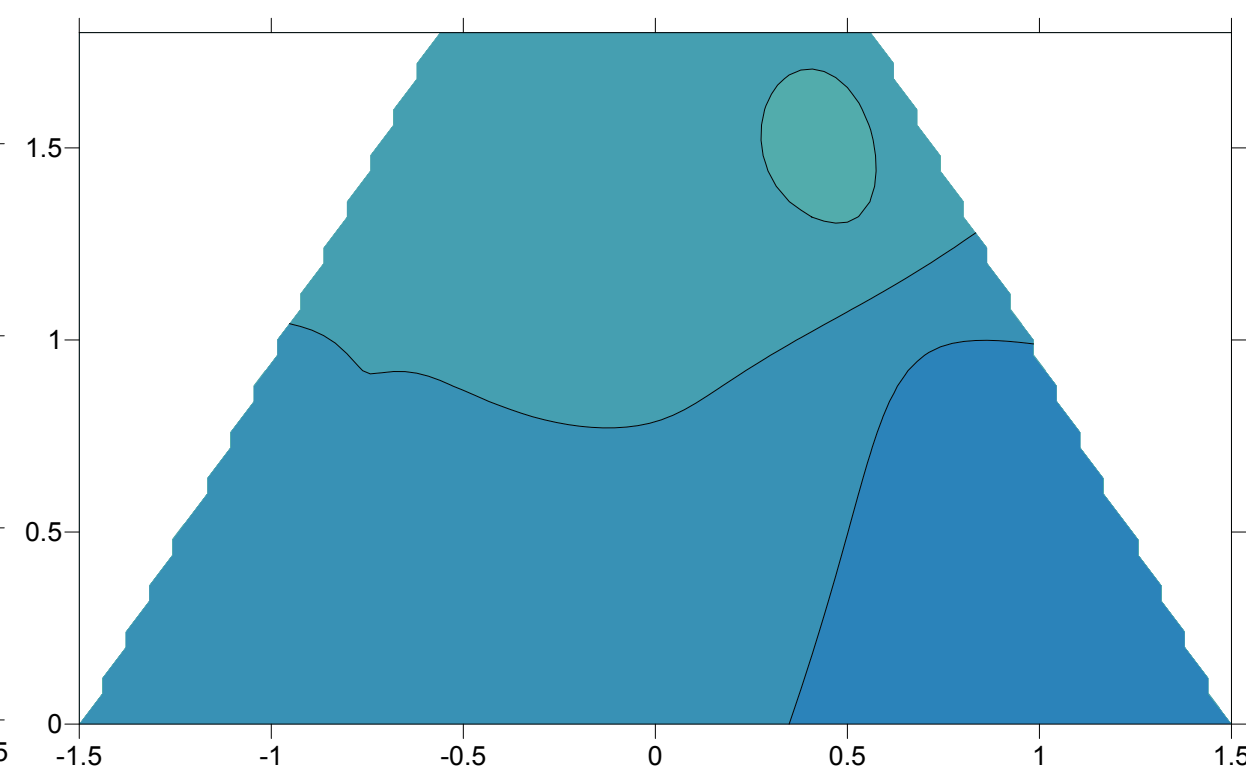

Supplement: s1 [file s1]

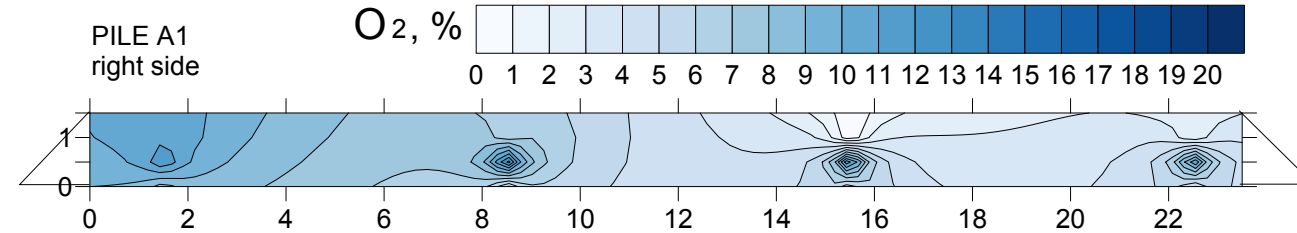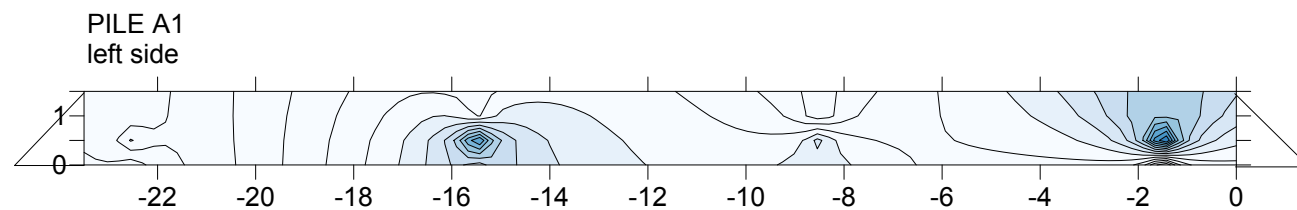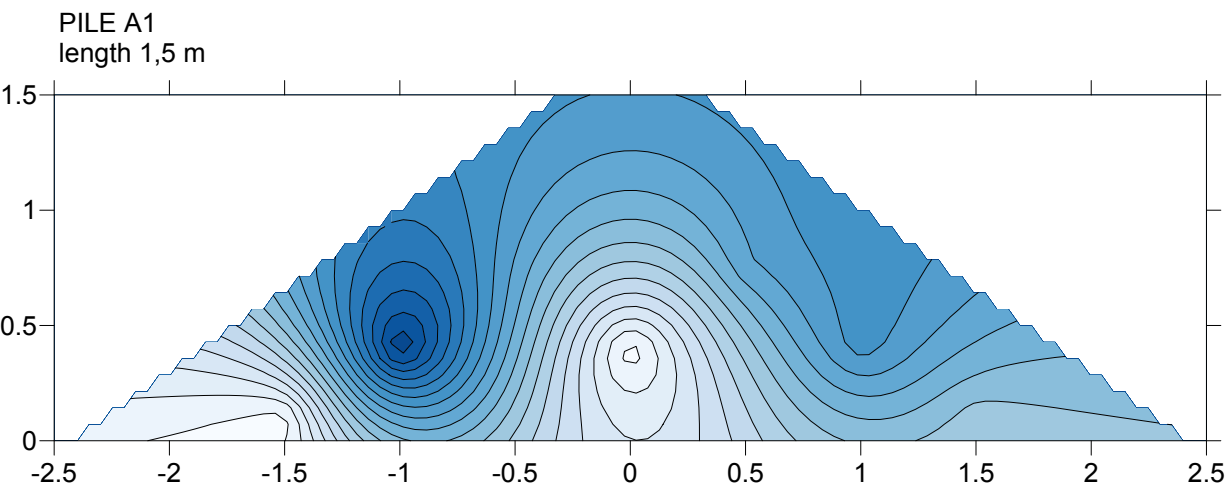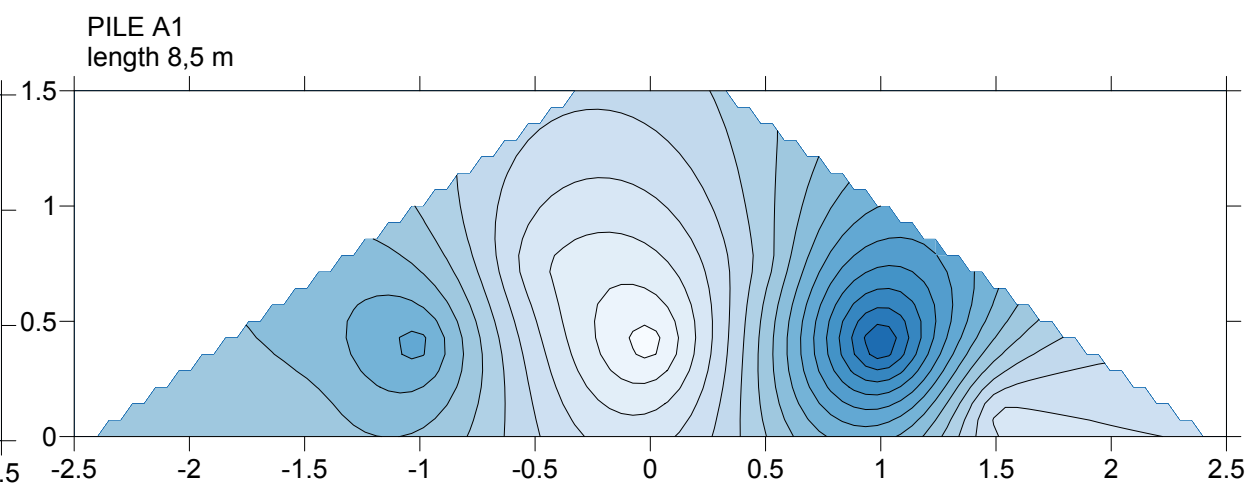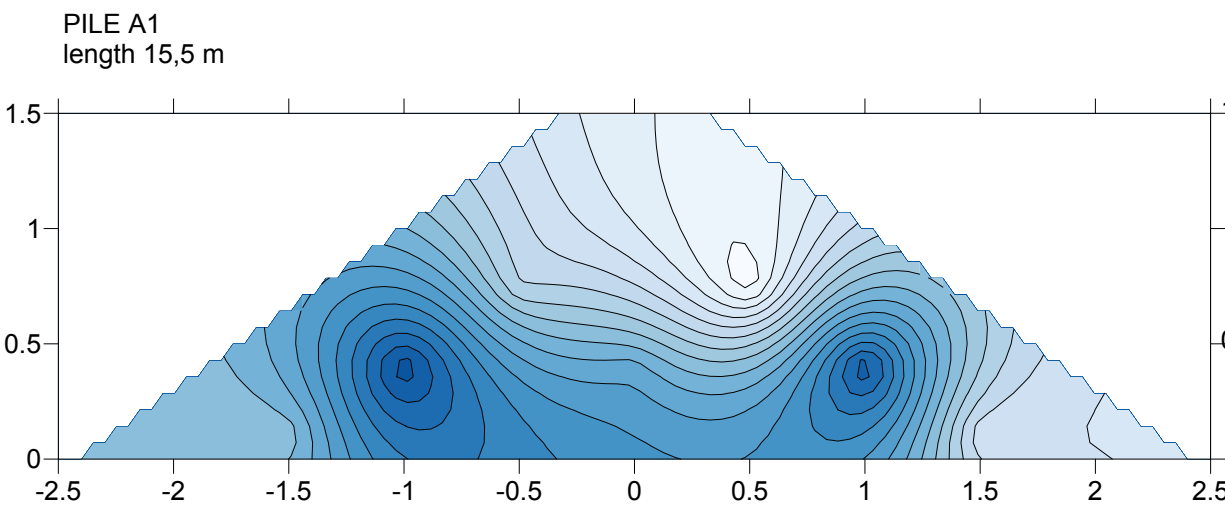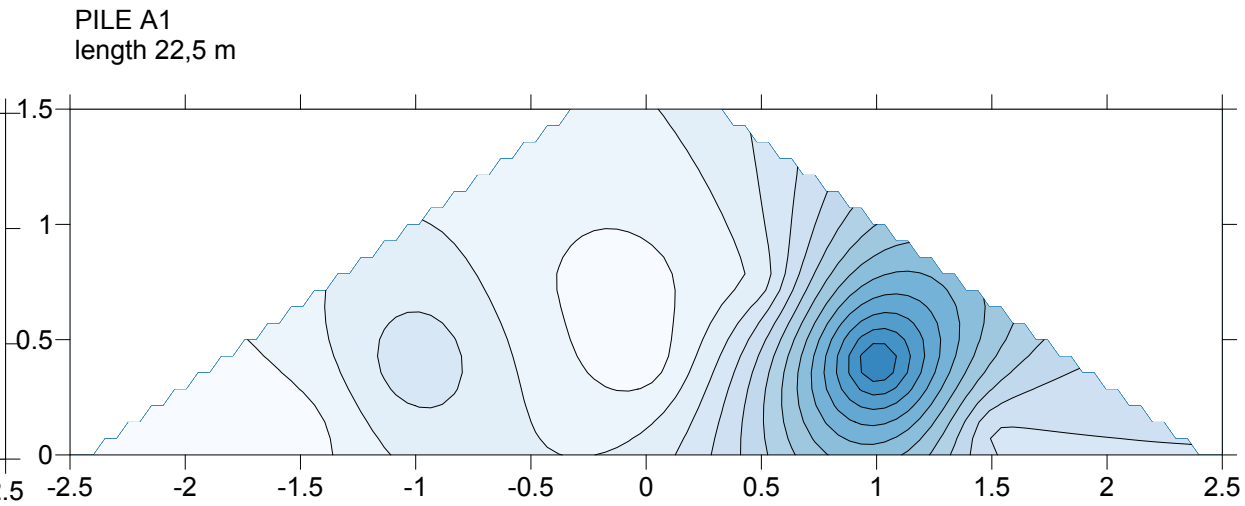

Supplement: s1 [file s1]

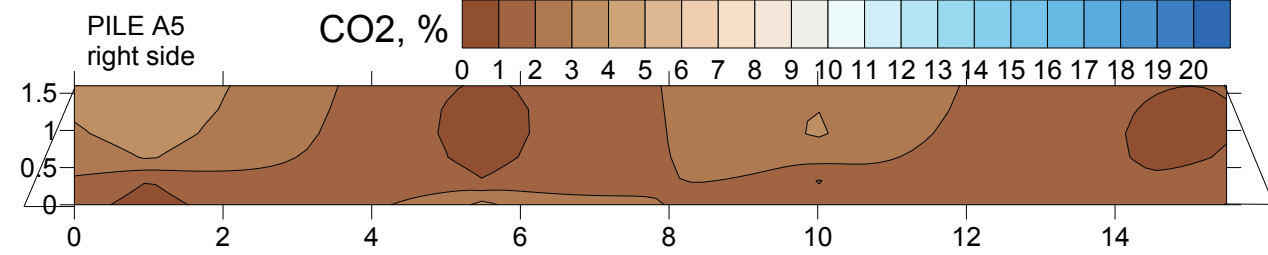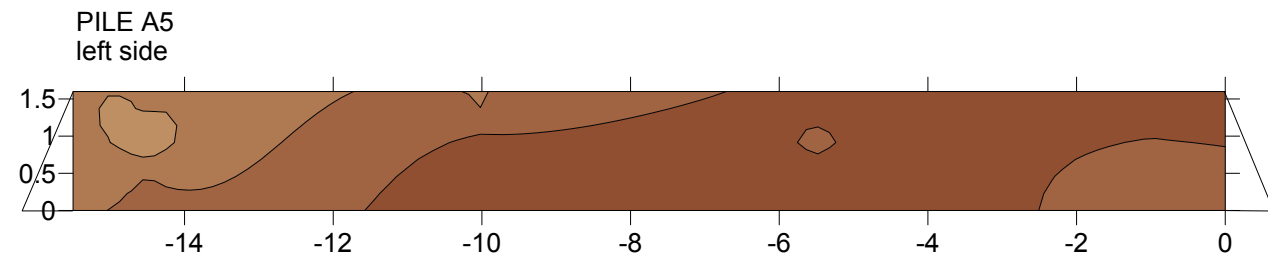

PILE A5  
length 1,0 m

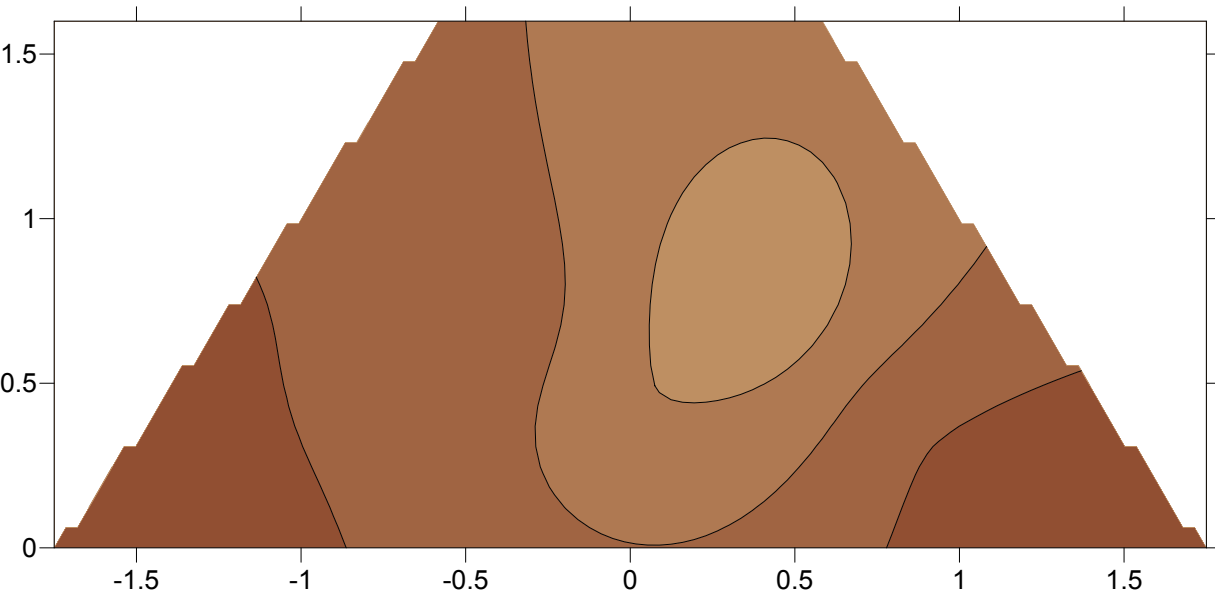

PILE A5  
length 5,5 m

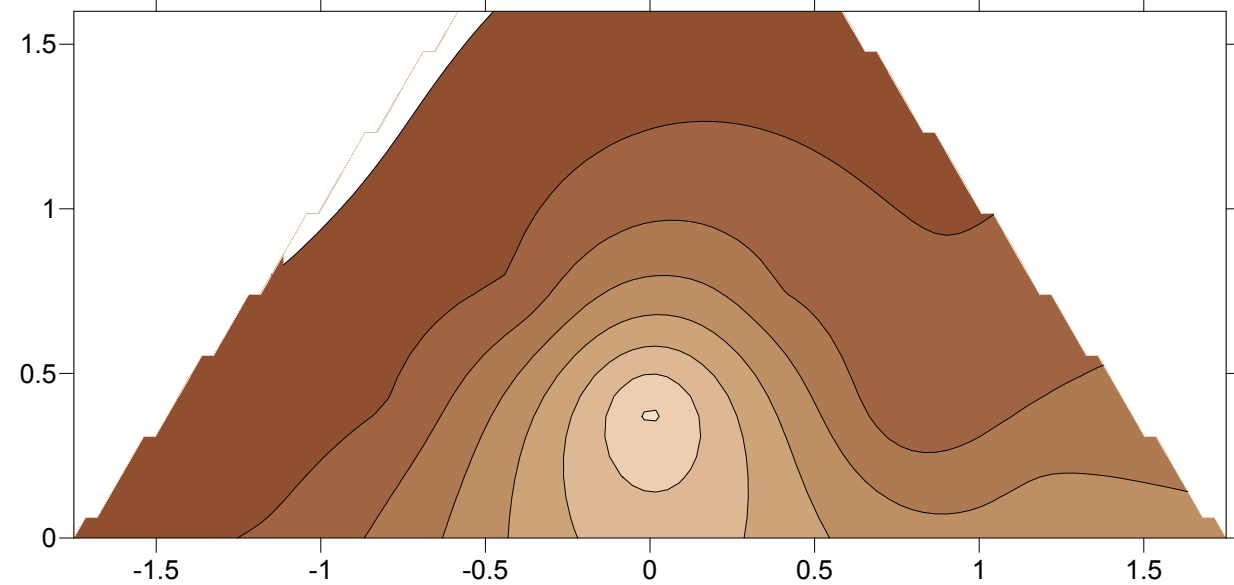

PILE A5  
length 10,0 m

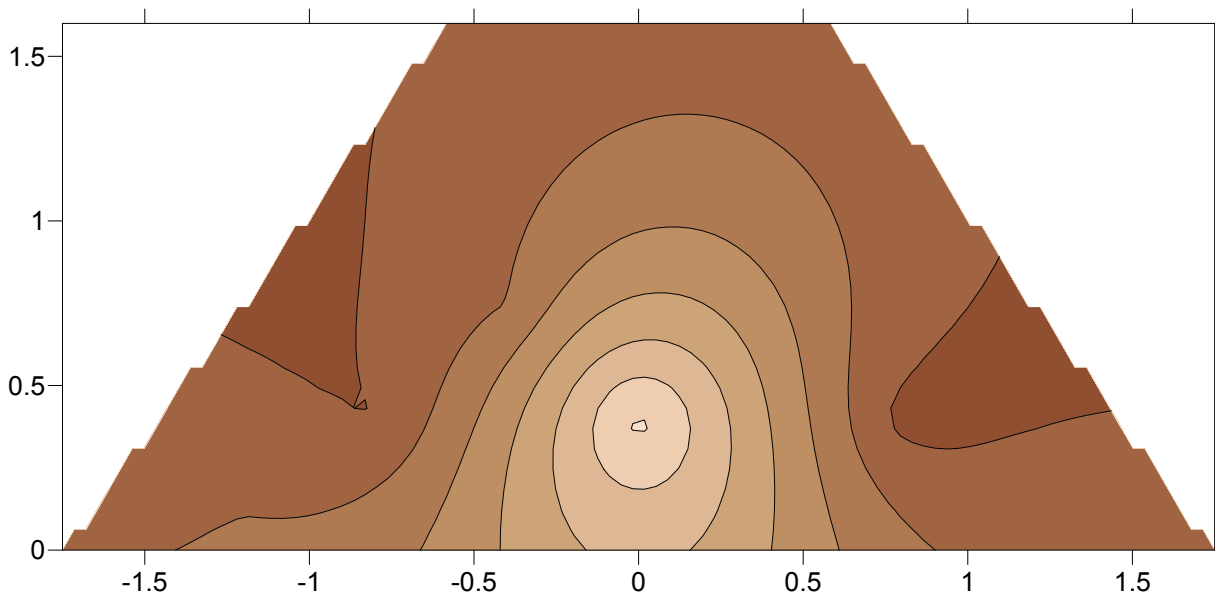

PILE A5  
length 14,5 m

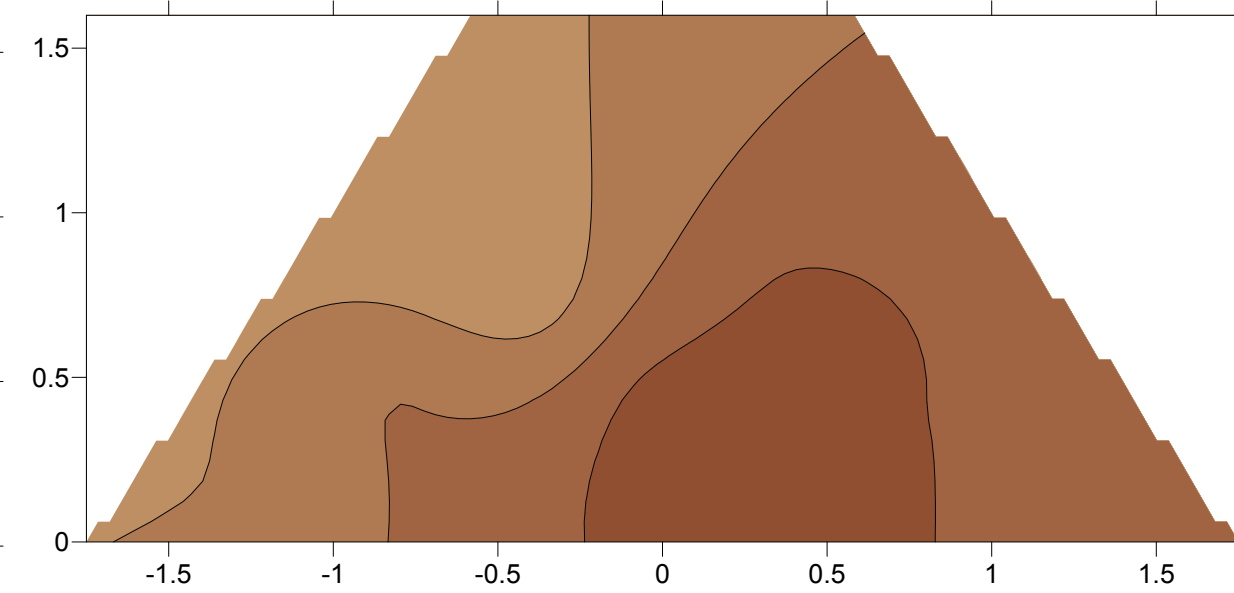

Supplement: s1 [file s1]

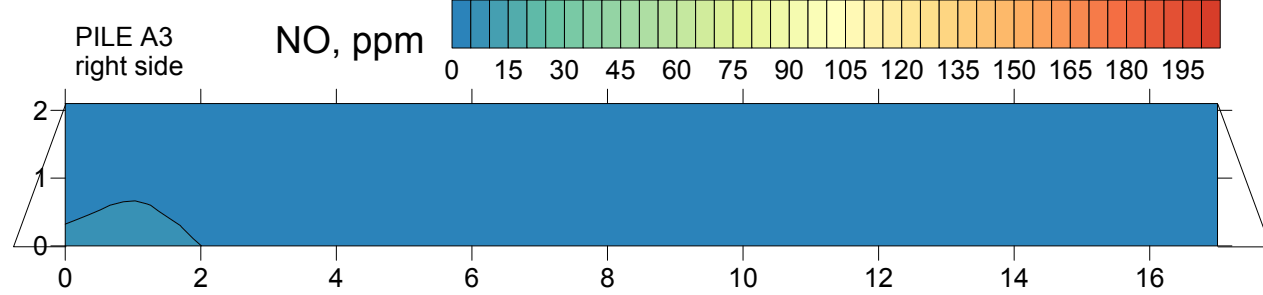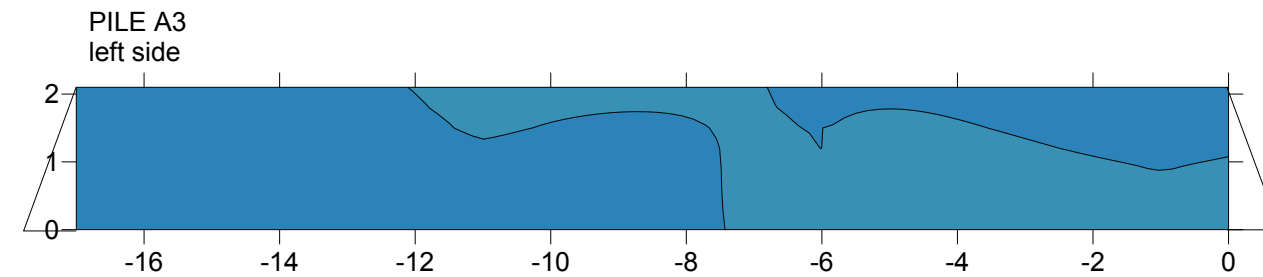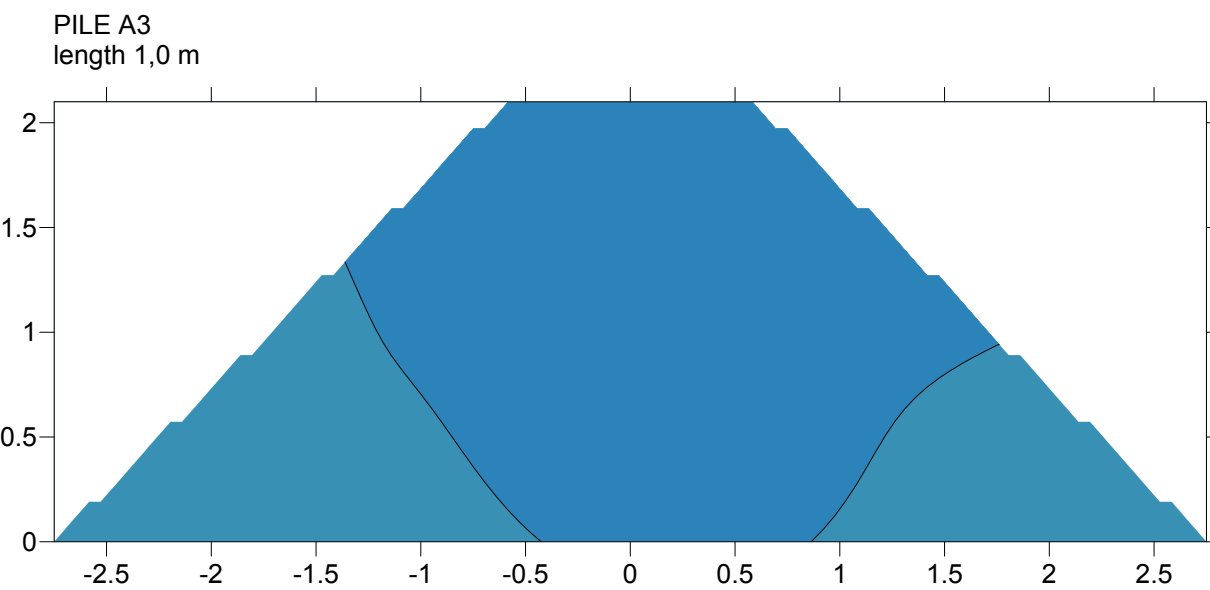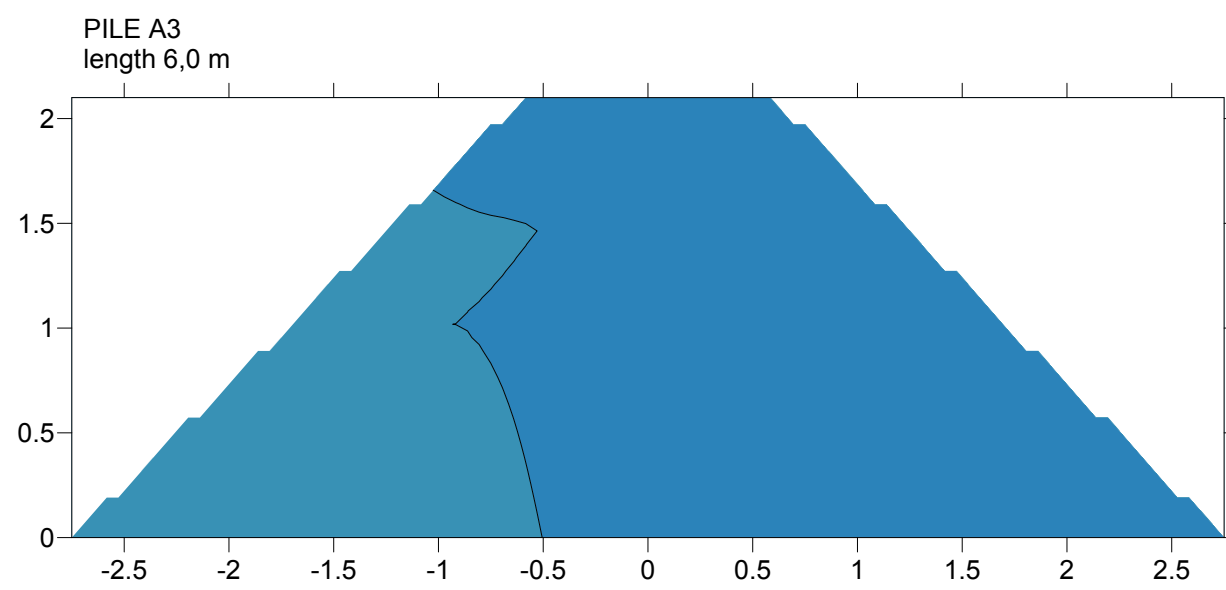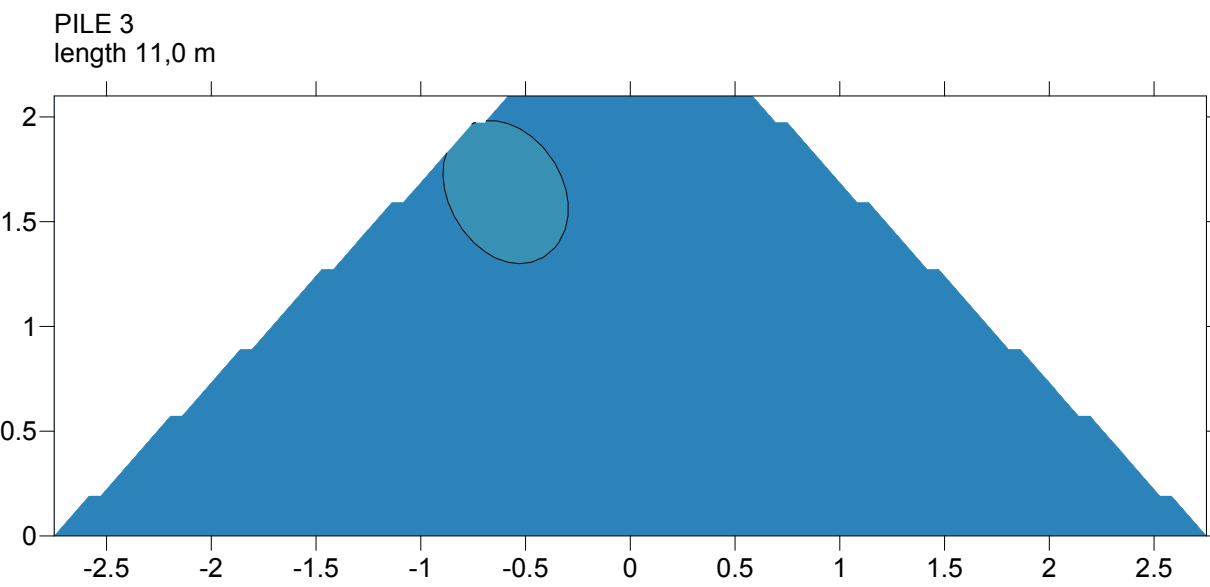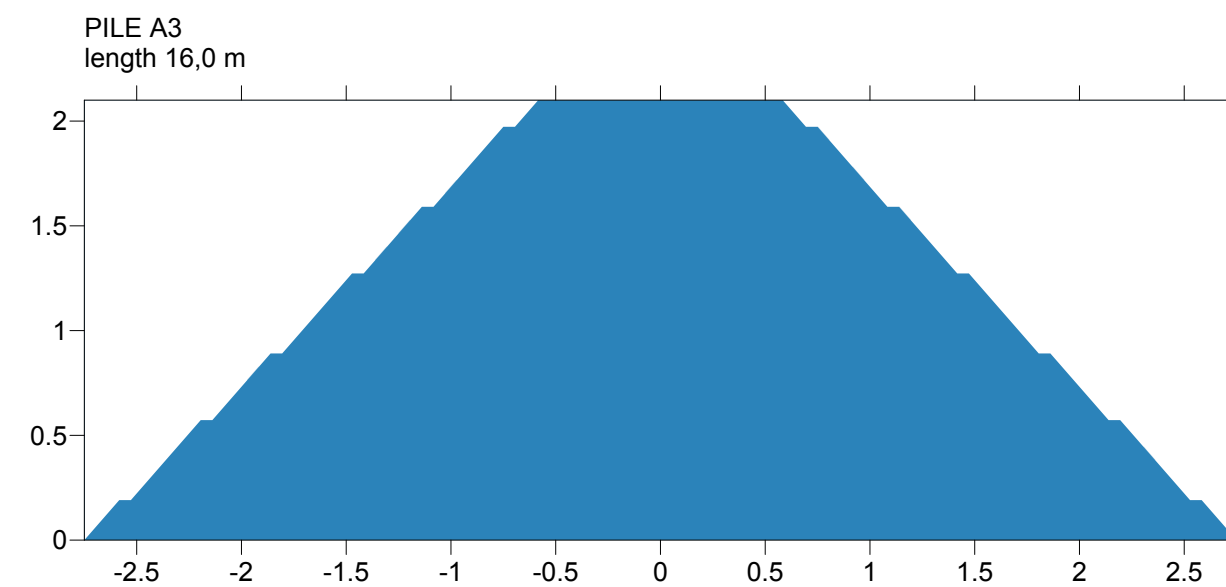

Supplement: s1 [file s1]

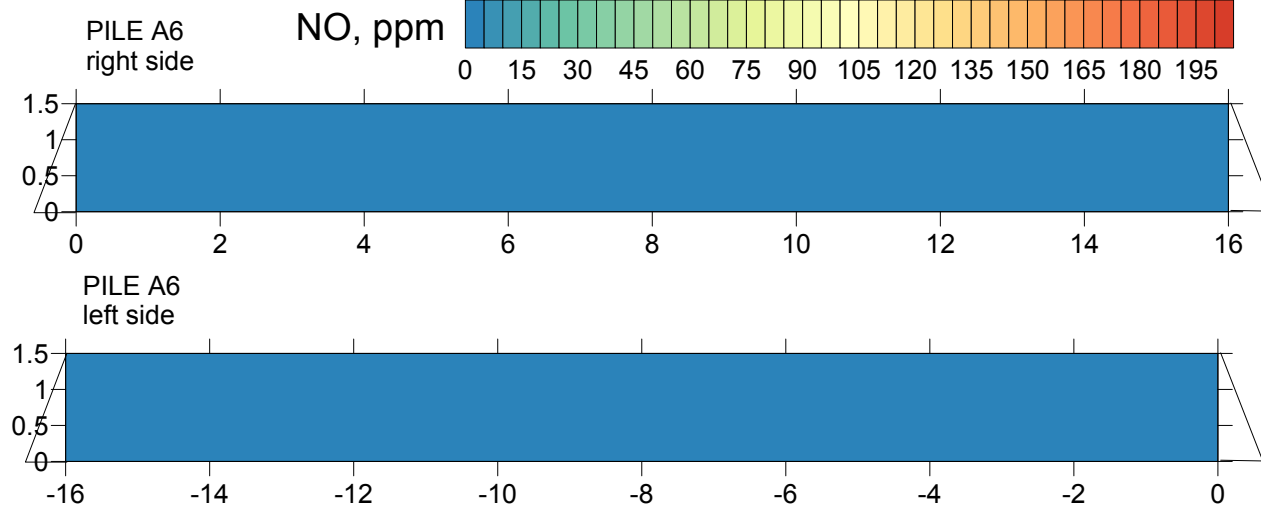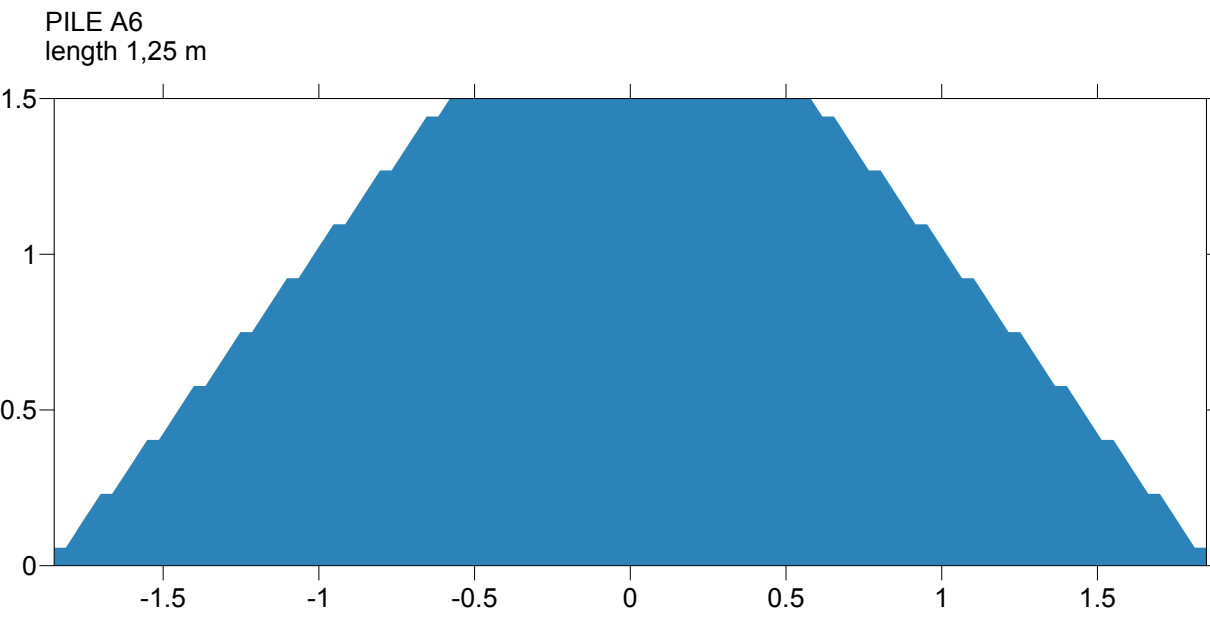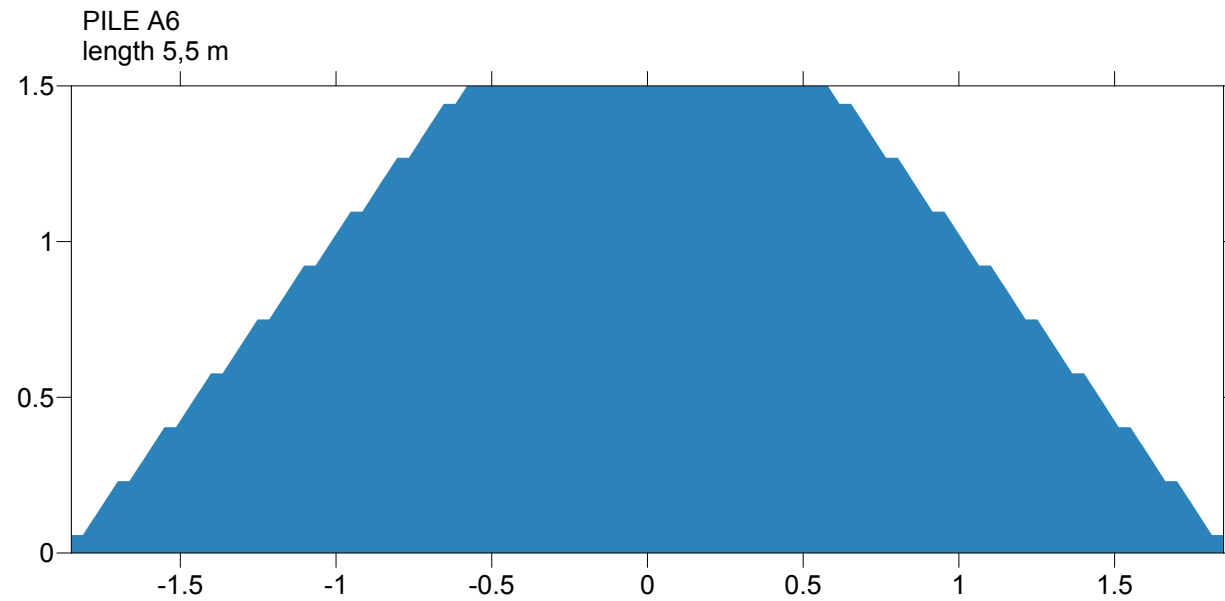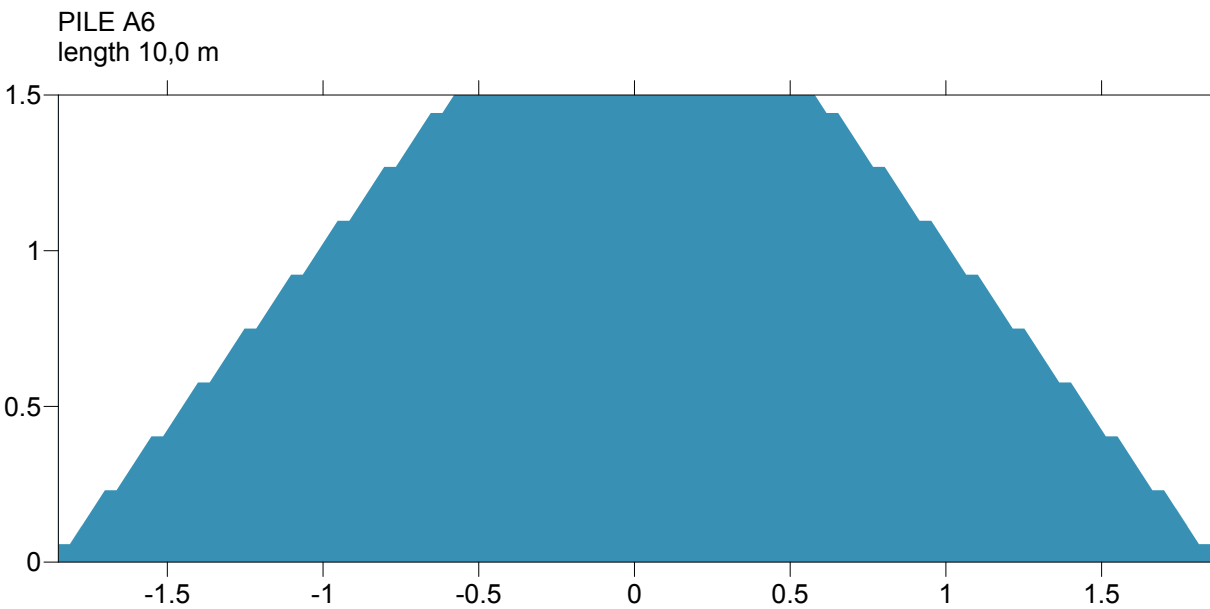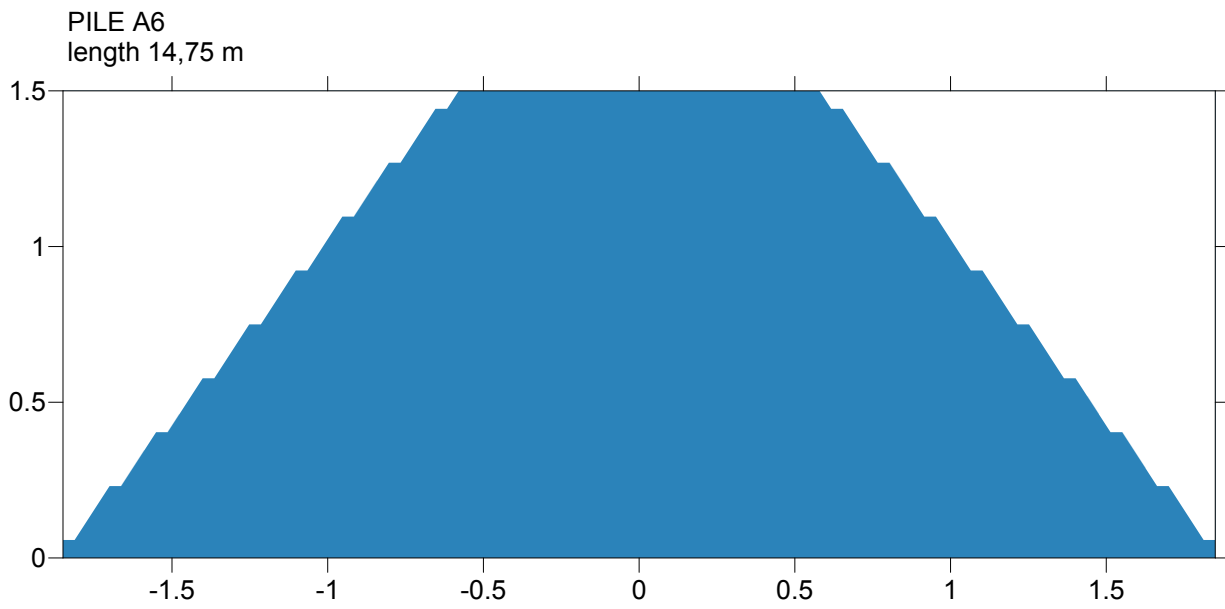

Supplement: s1 [file s1]

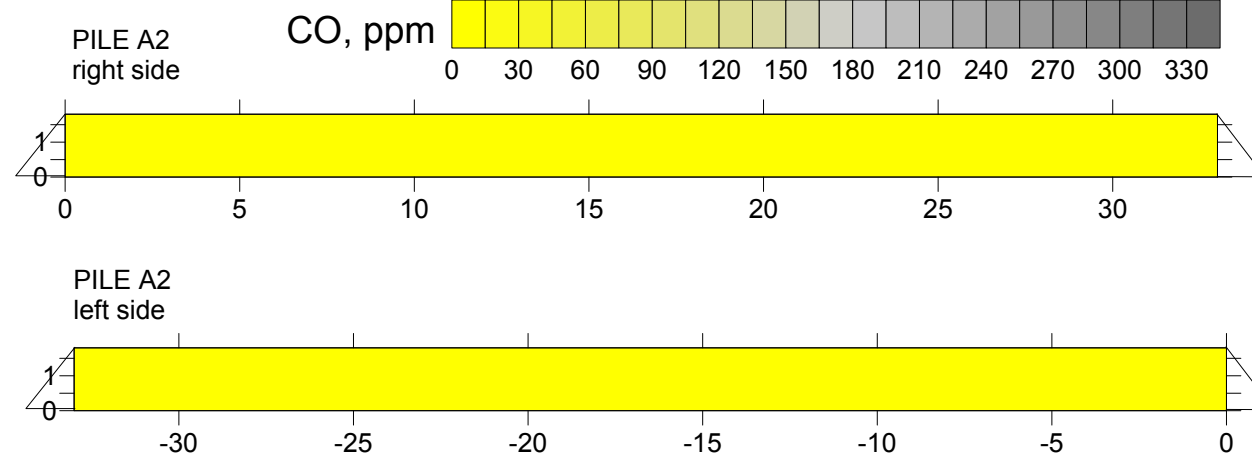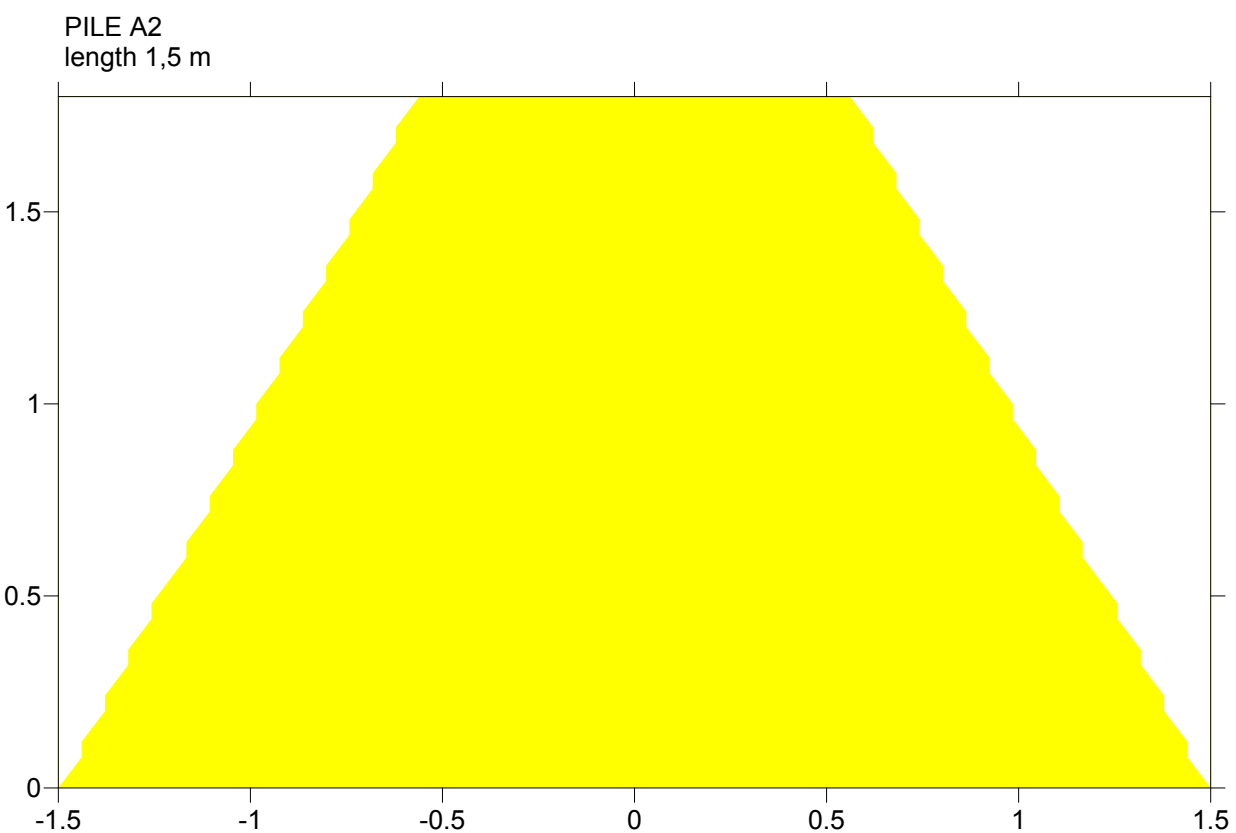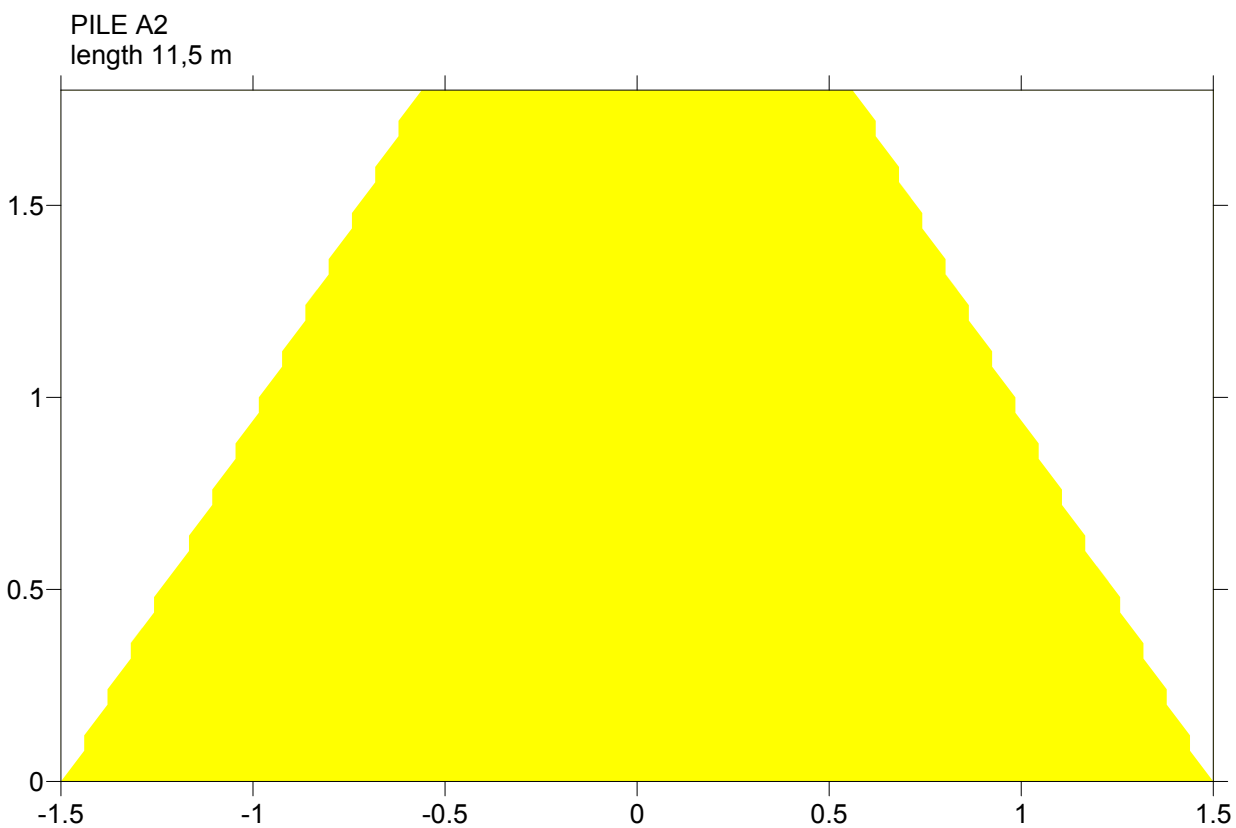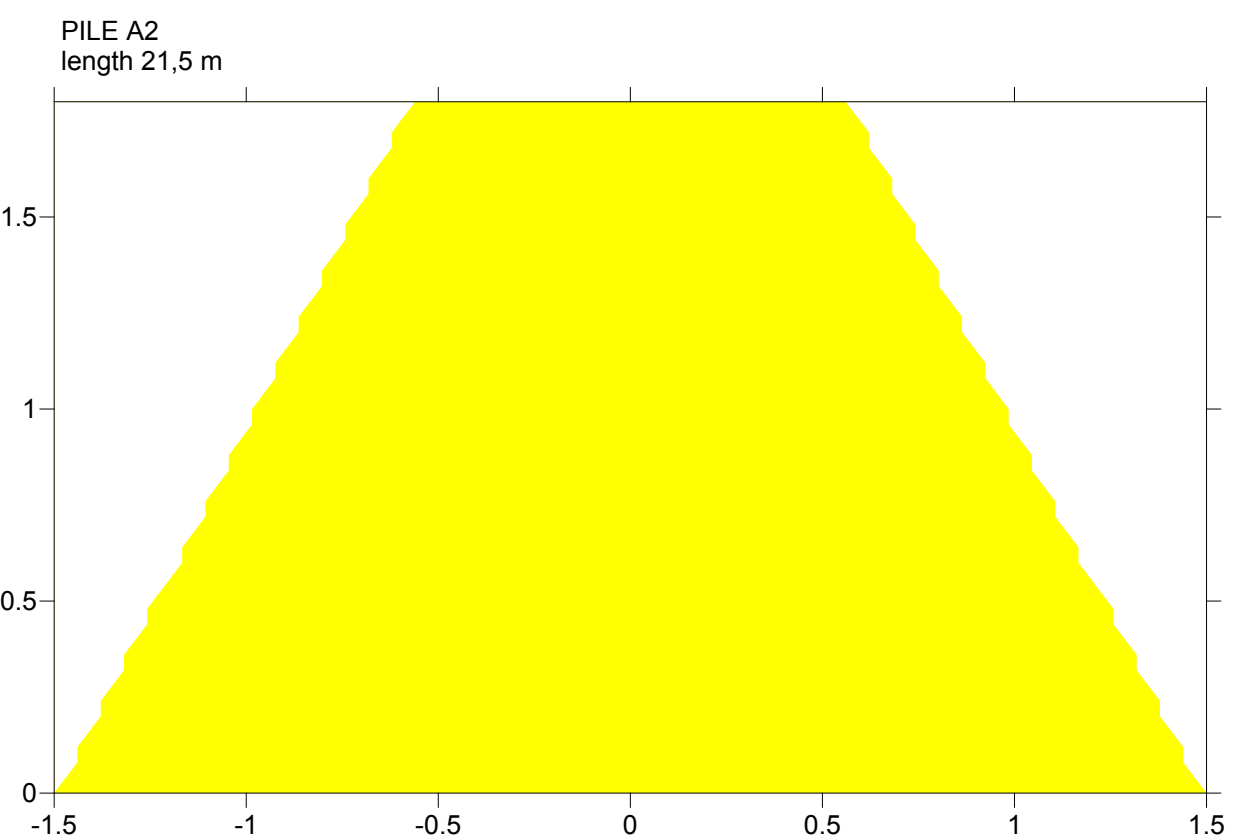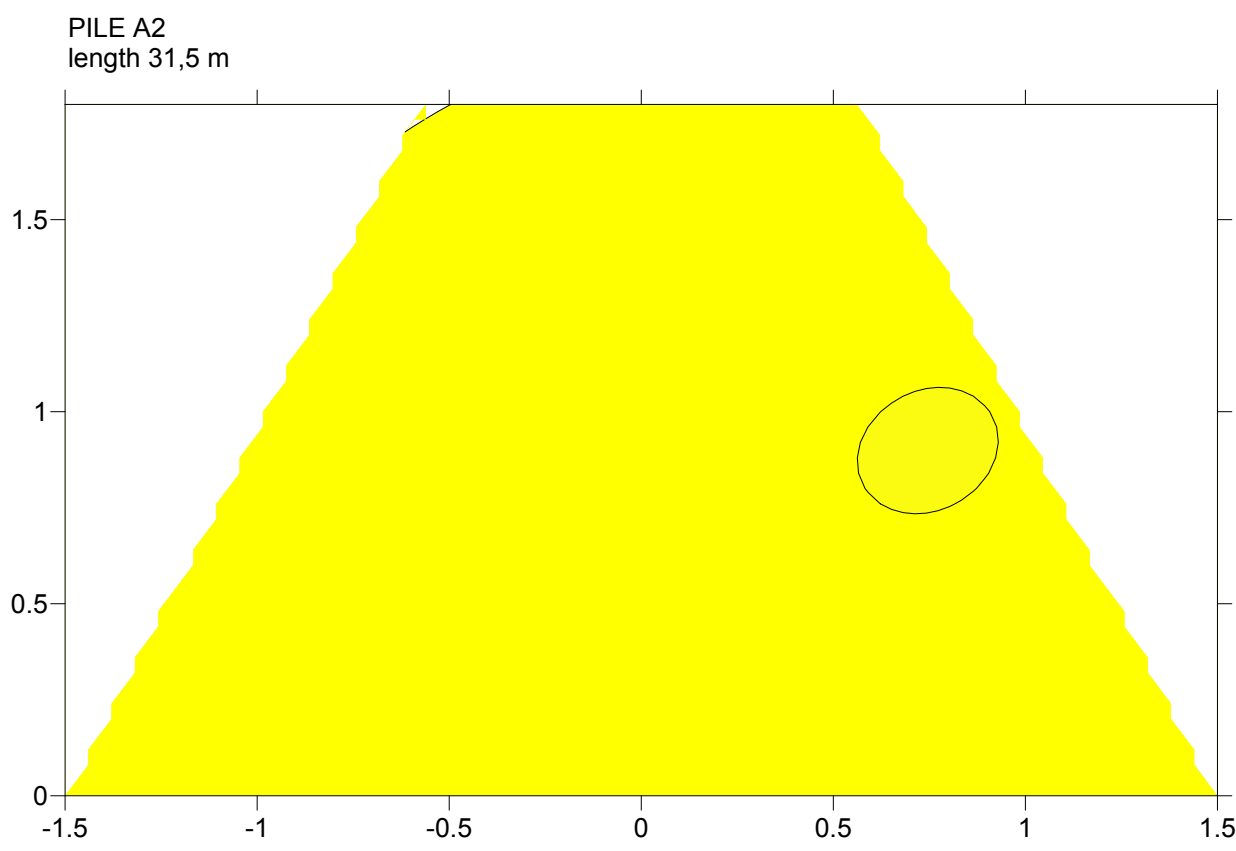

Supplement: s1 [file s1]

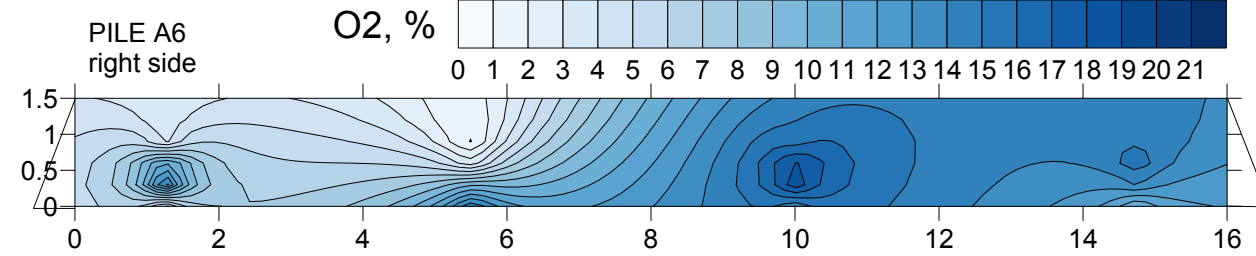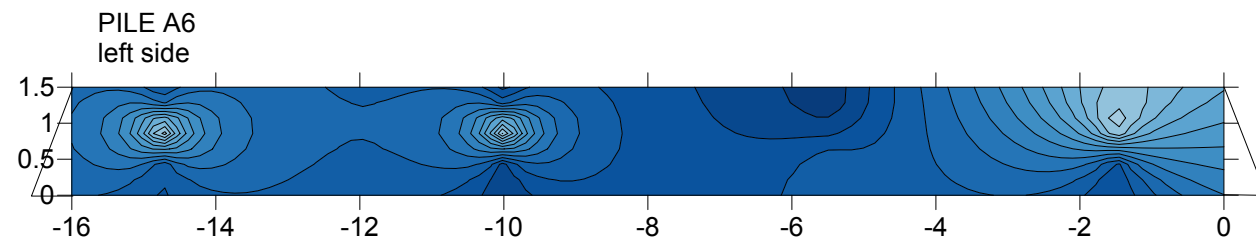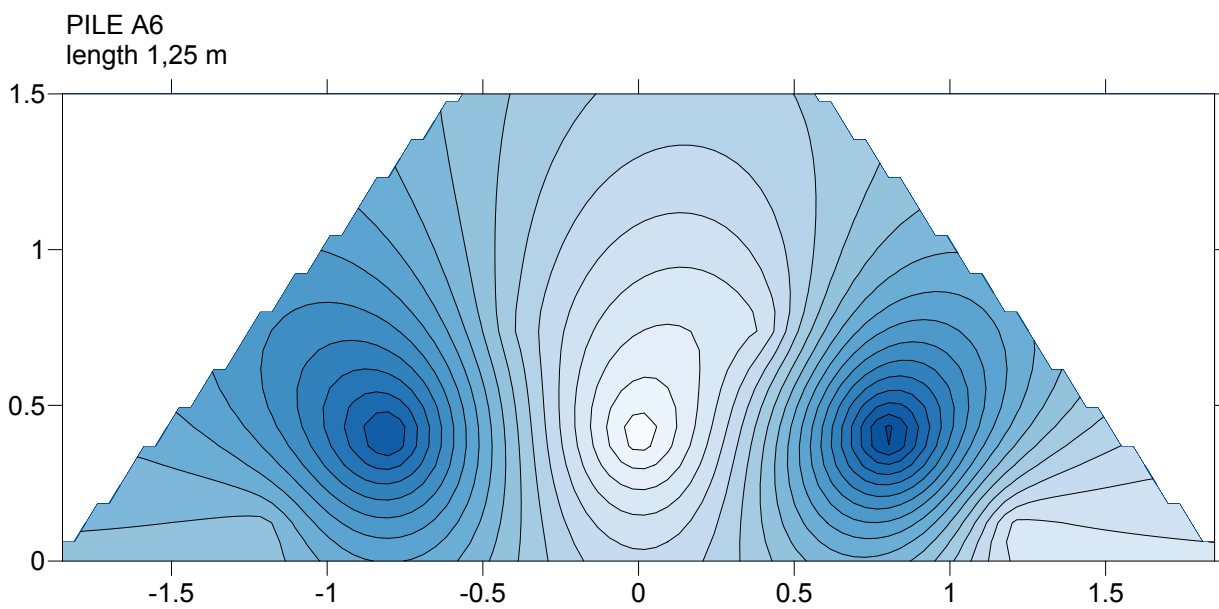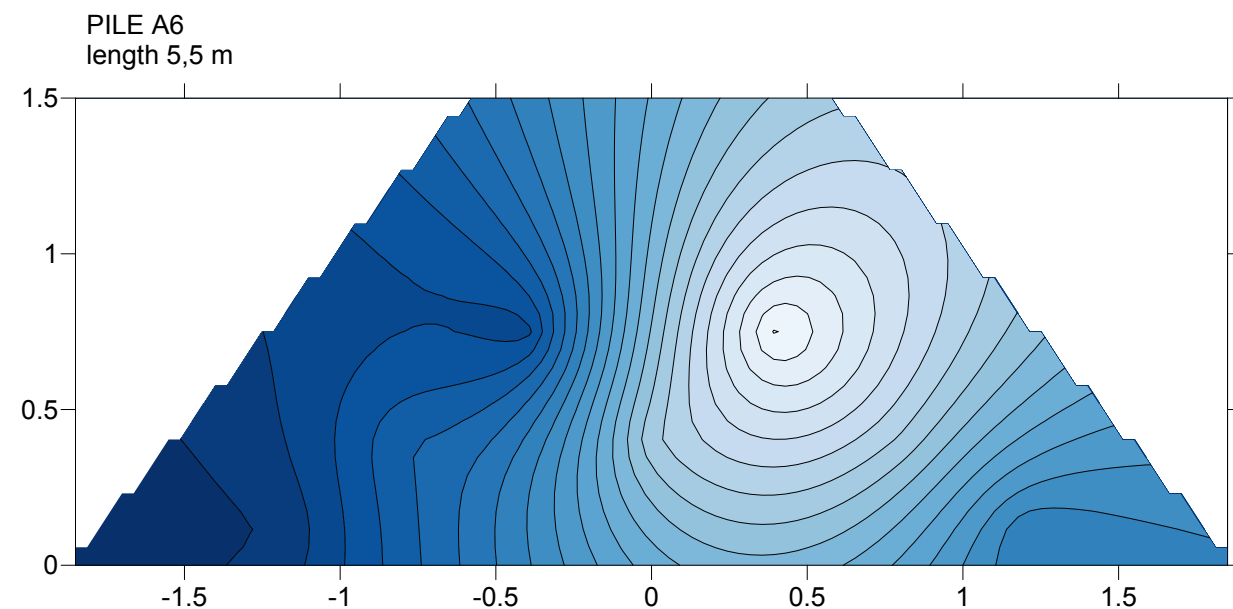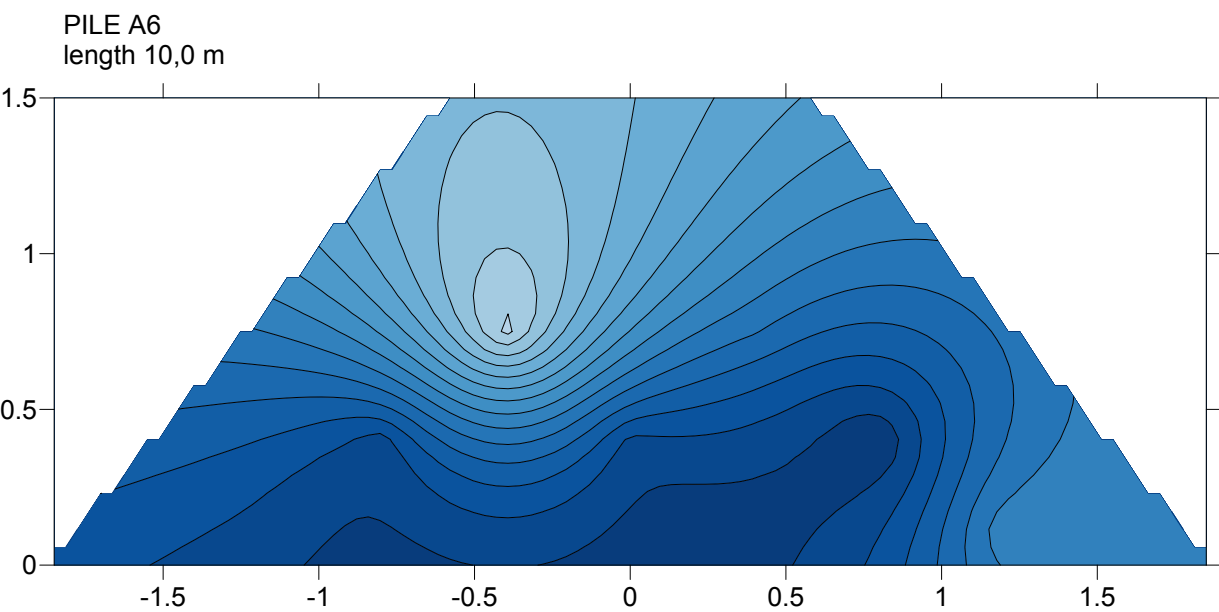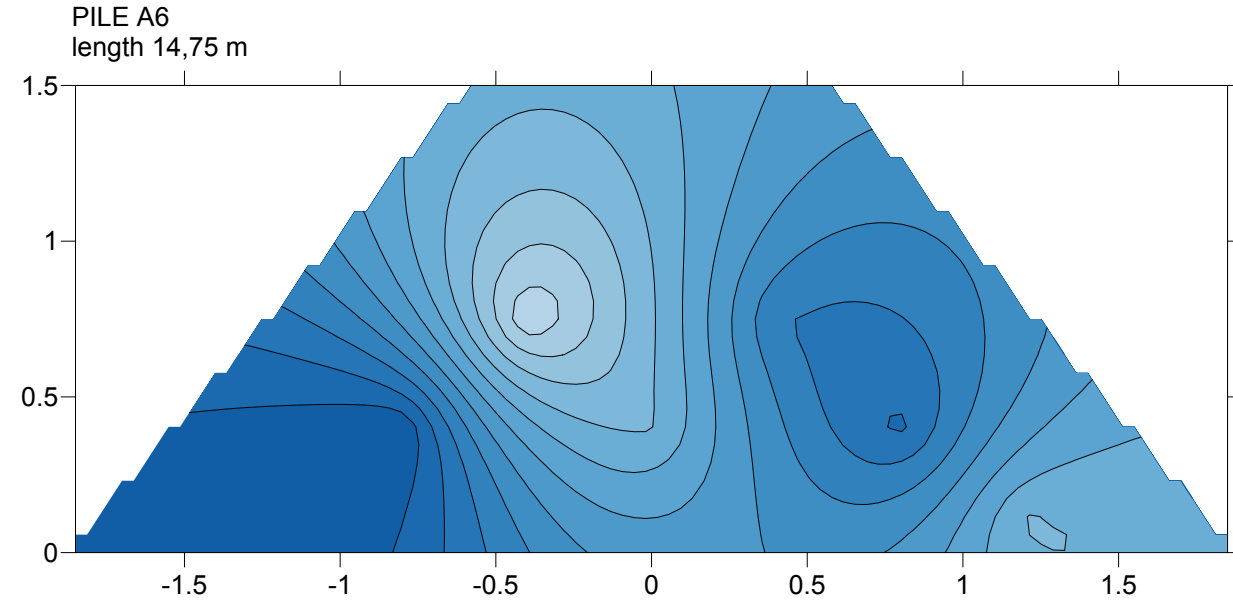

Supplement: s1 [file s1]

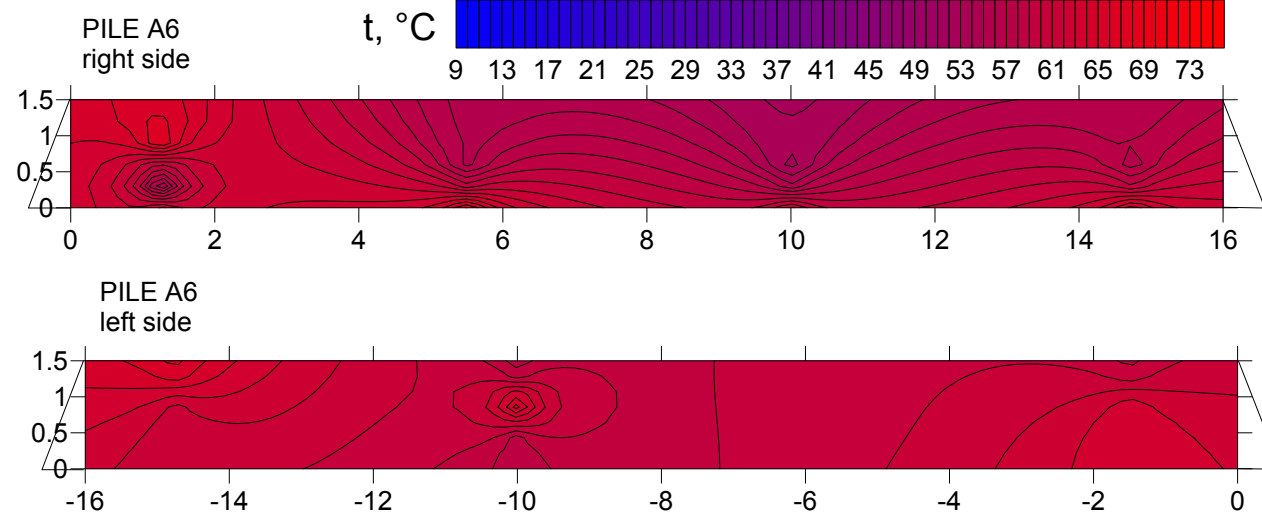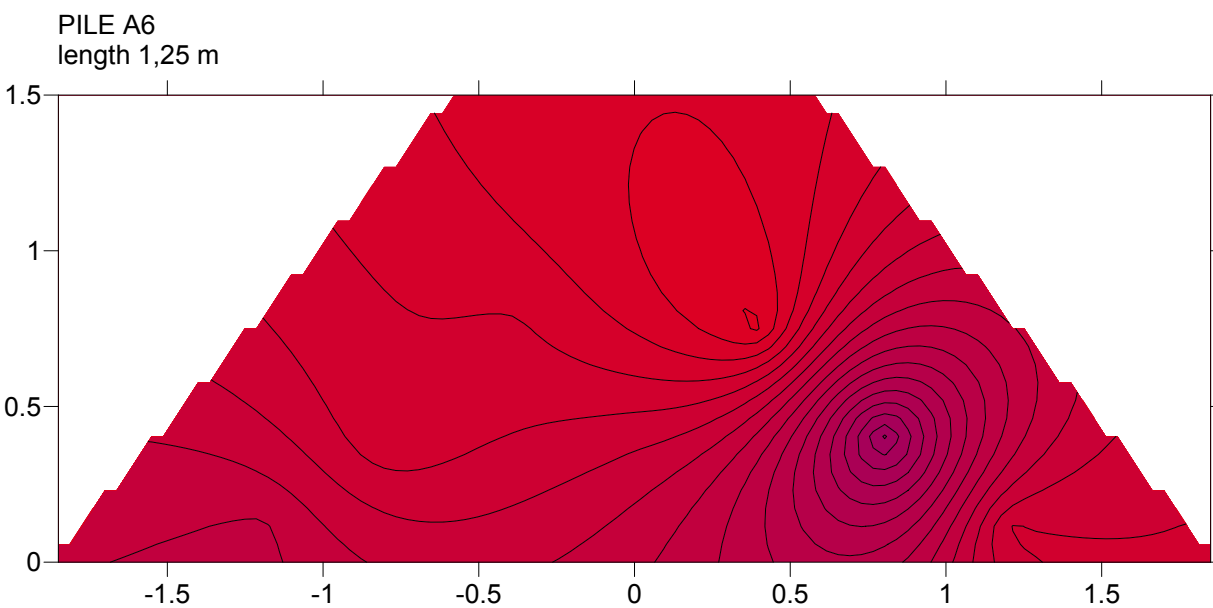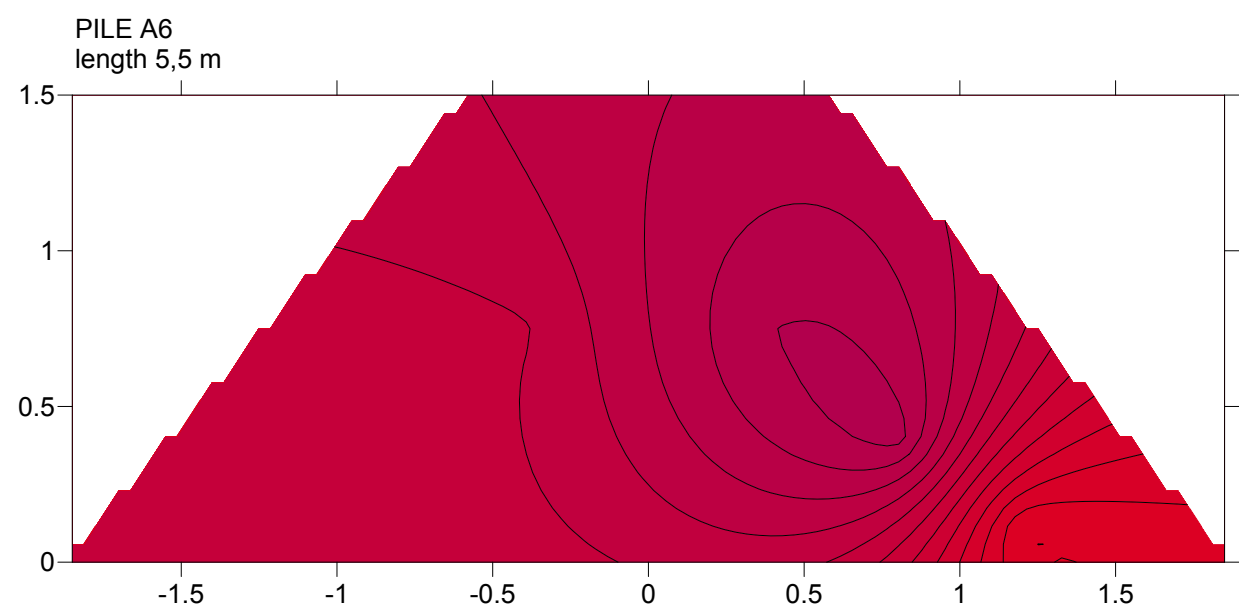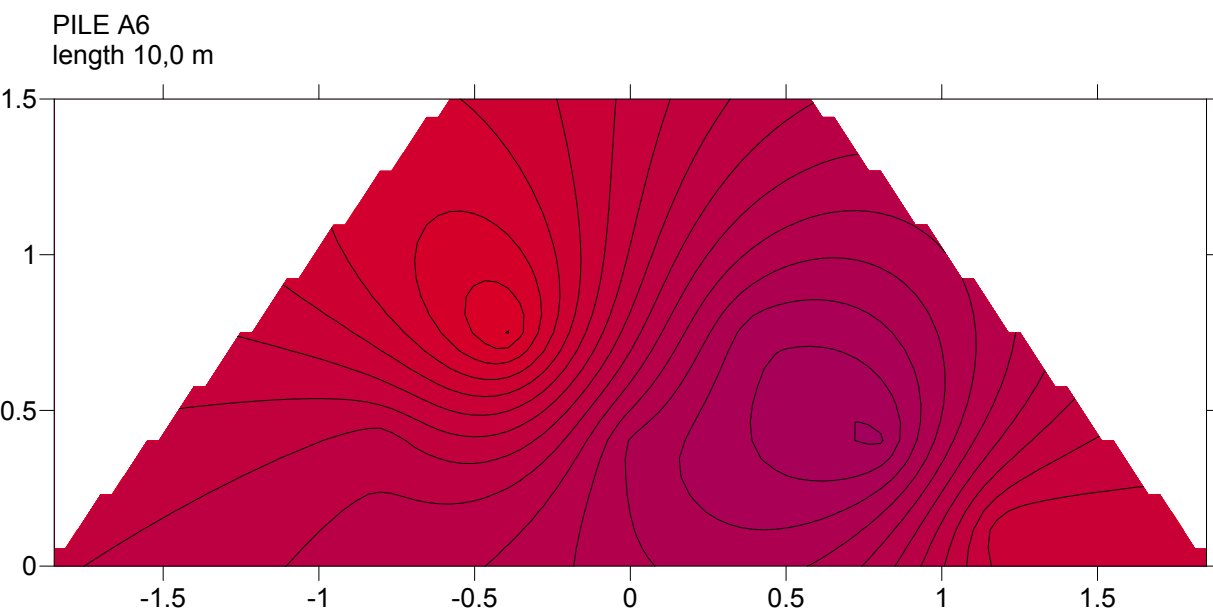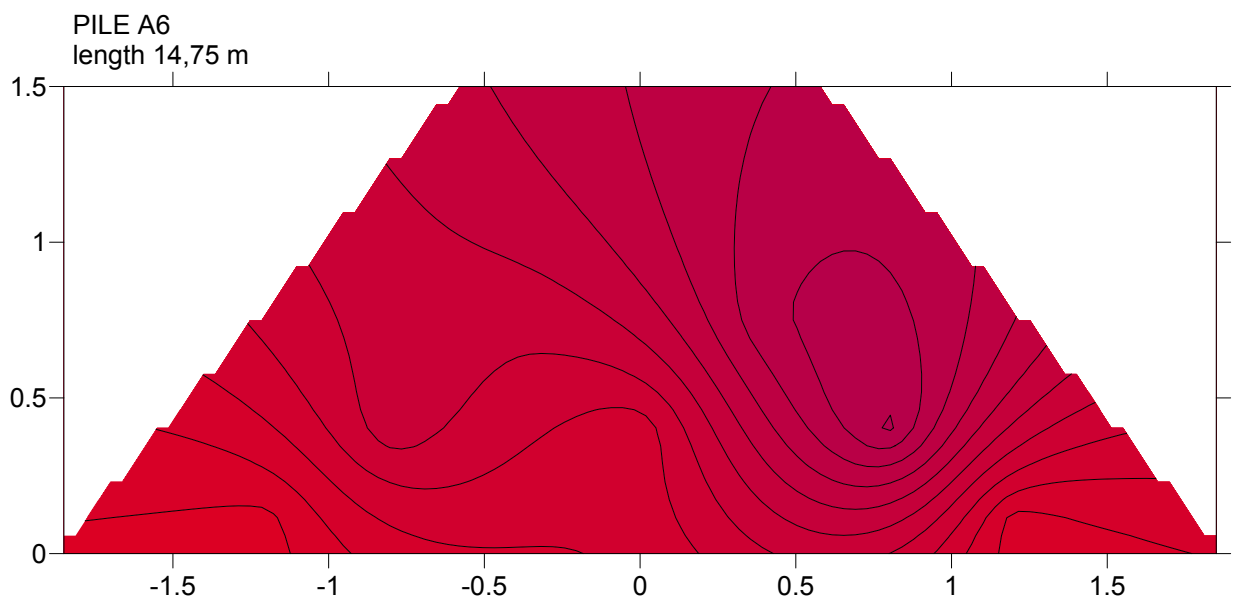

Supplement: s1 [file s1]

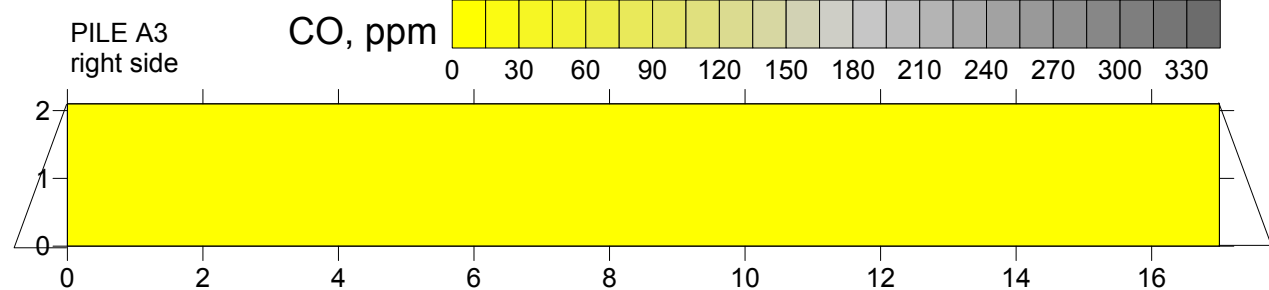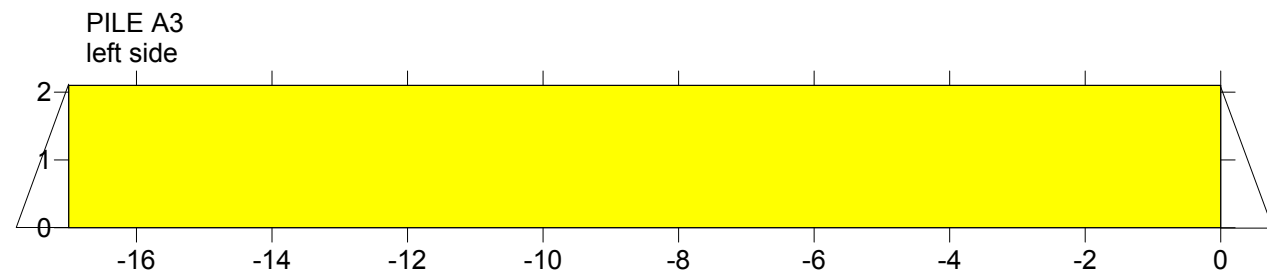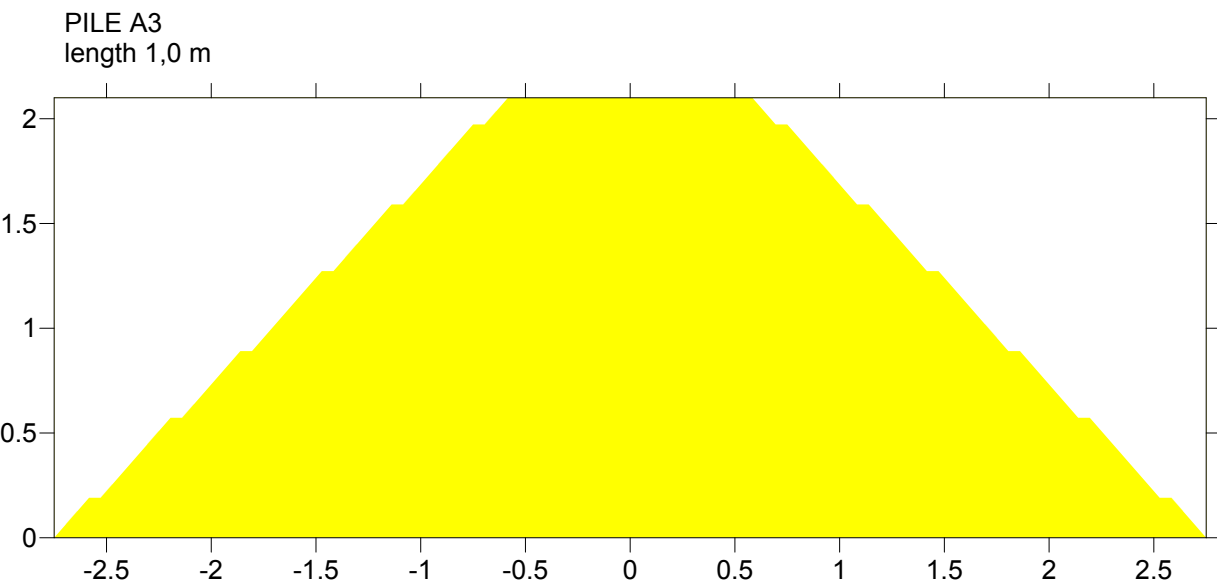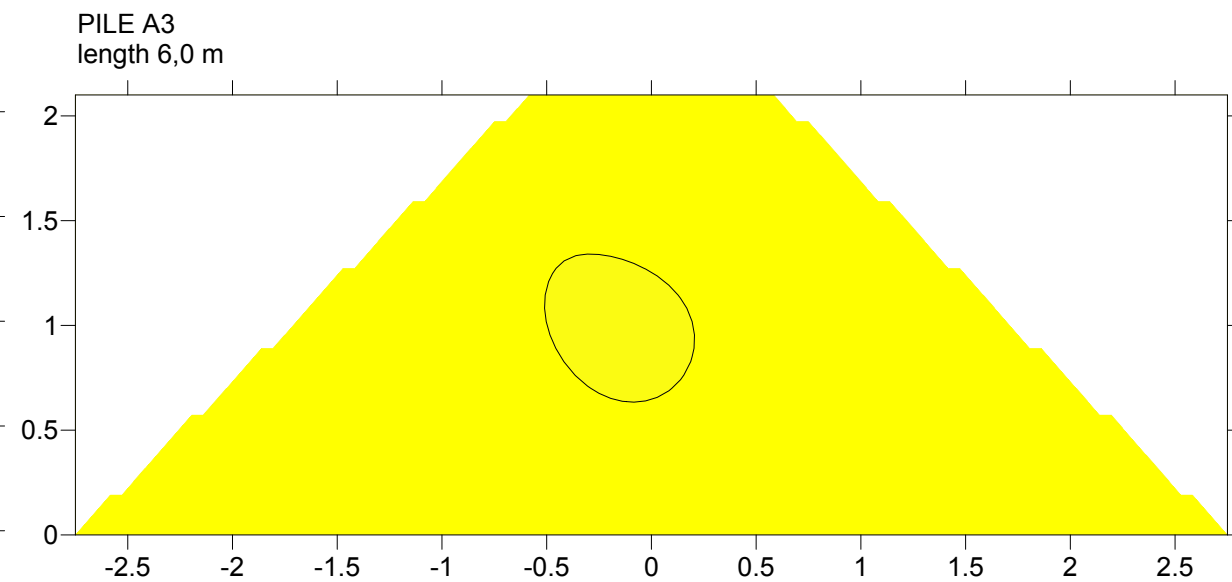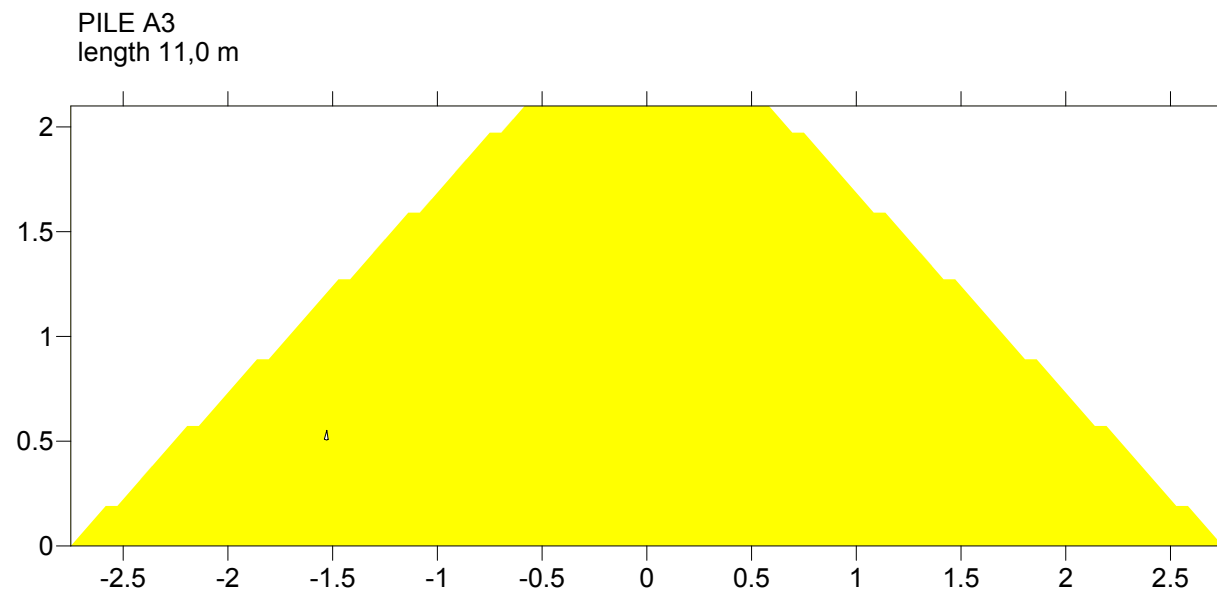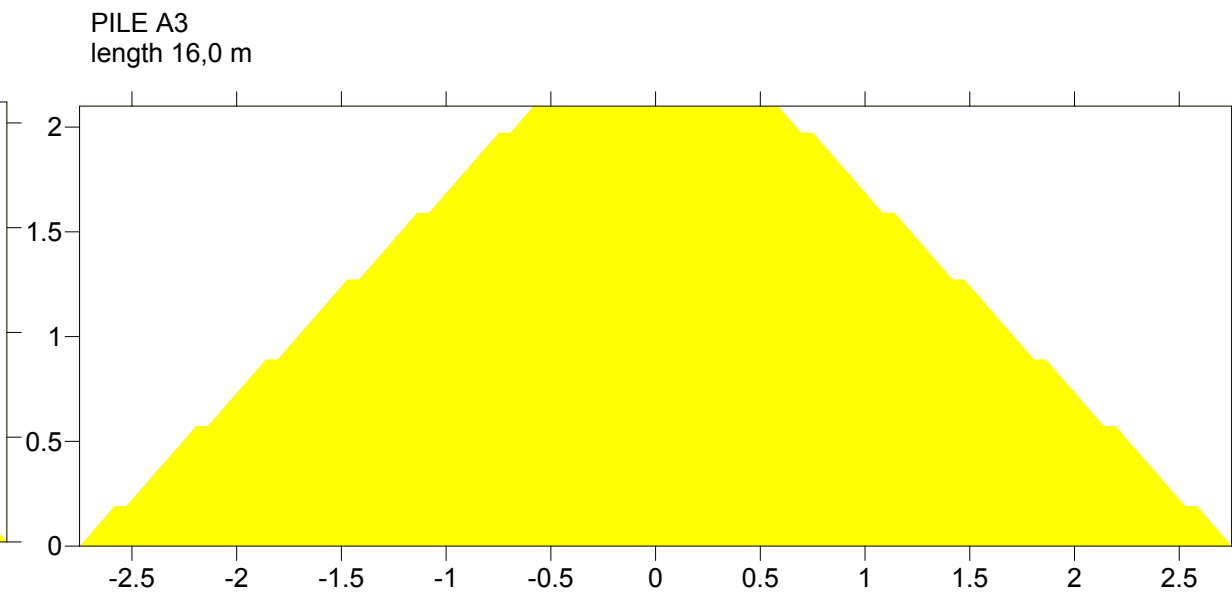

Supplement: s1 [file s1]

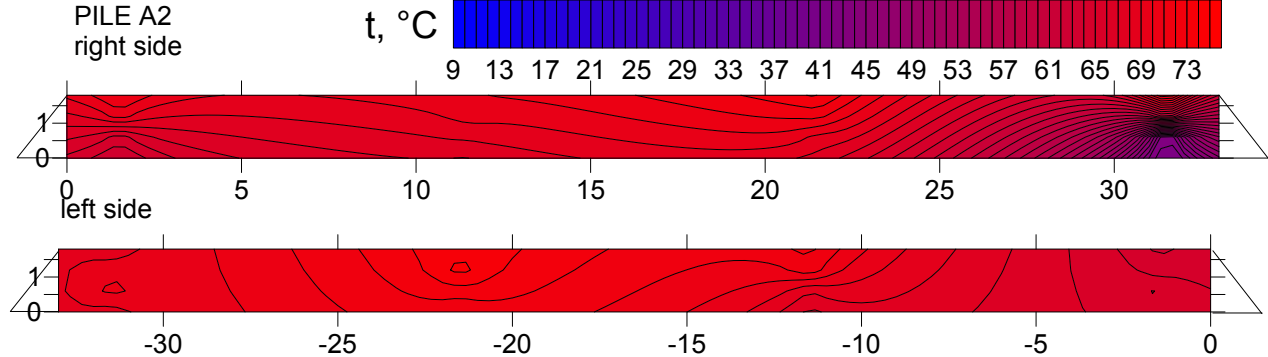

PILE A2  
length 1,5 m

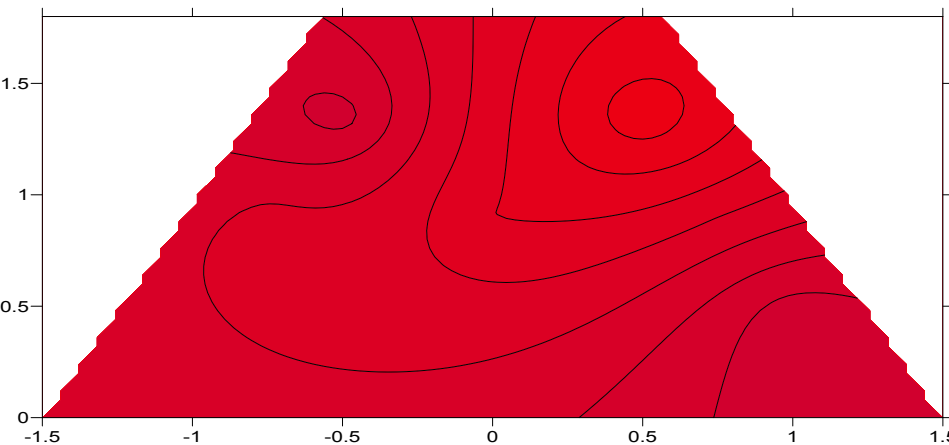

PILE A2  
length 11,5 m

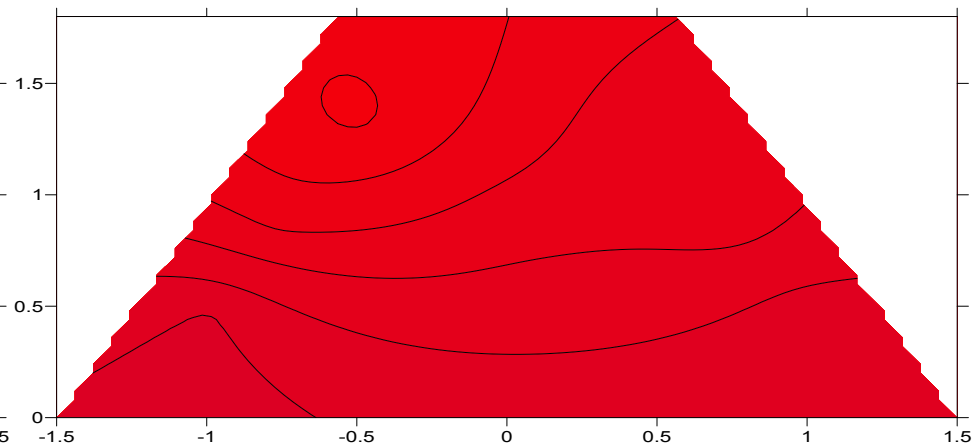

PILE A2  
length 21,5 m

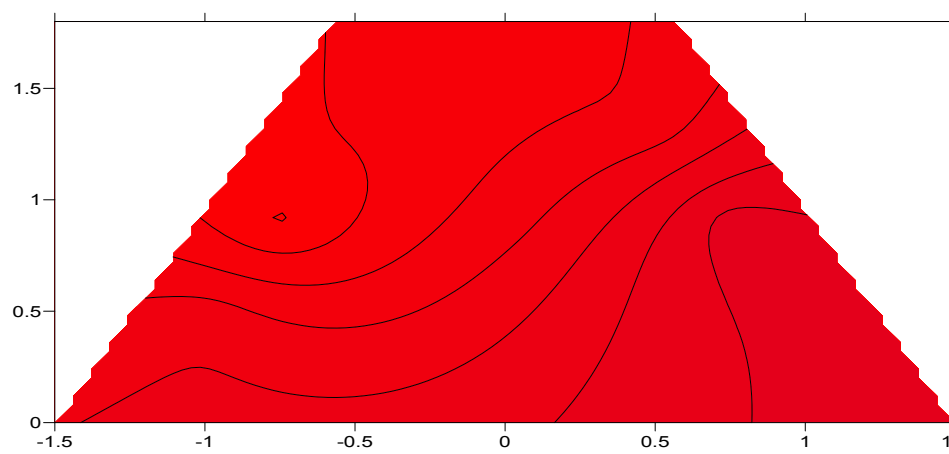

PILE A2  
length 31,5 m

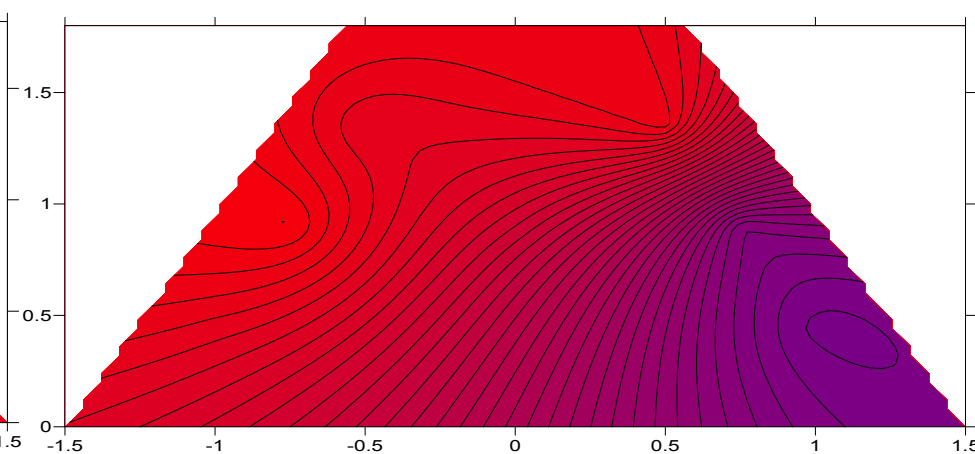

Supplement: s1 [file s1]

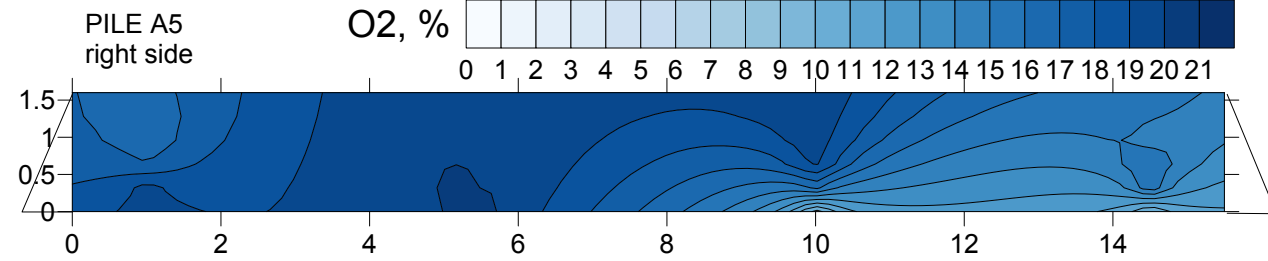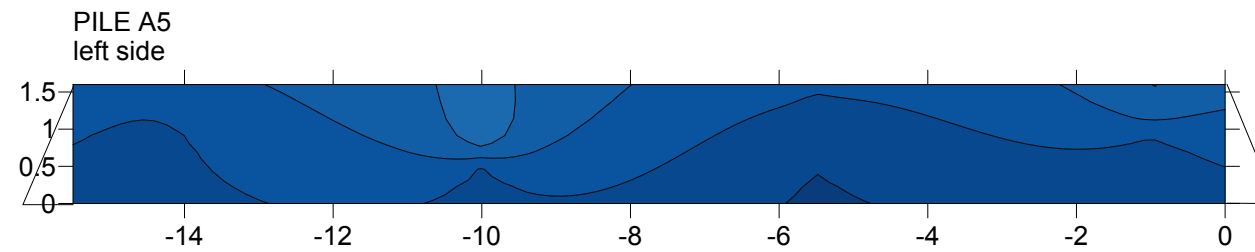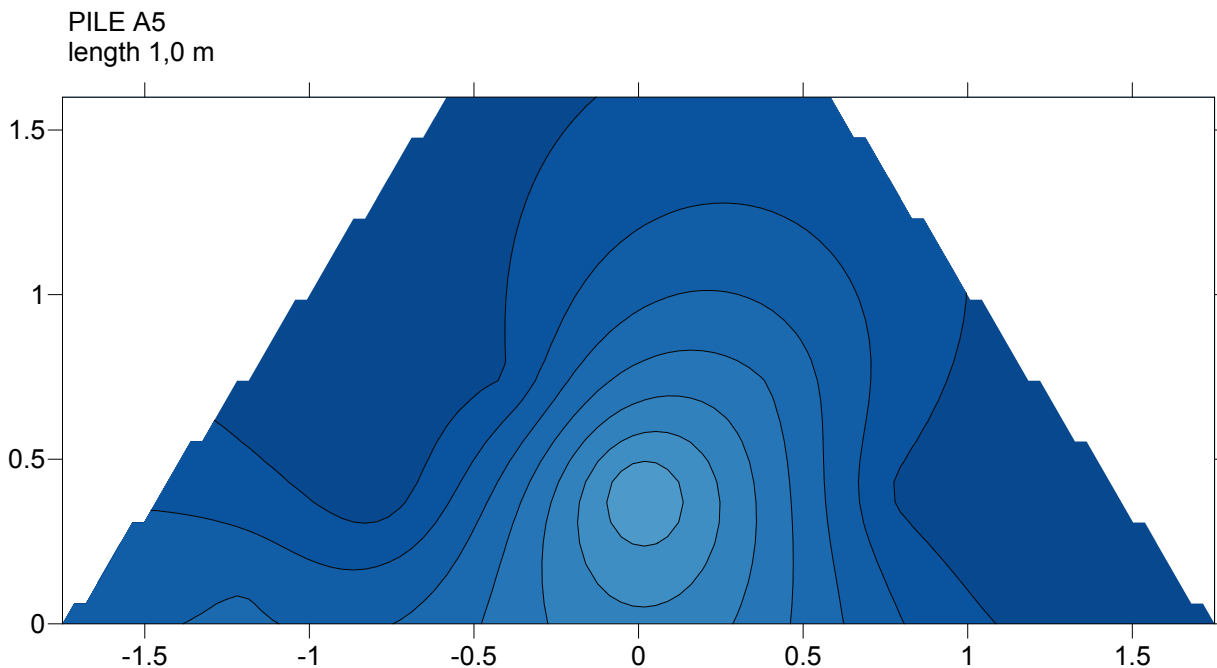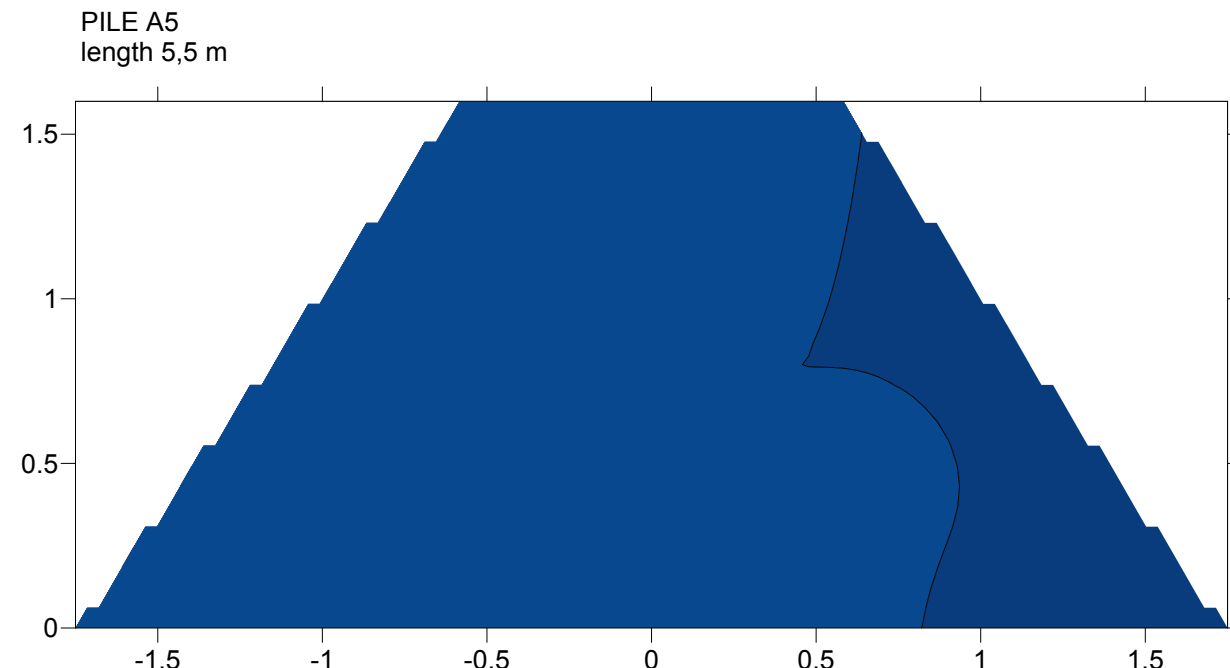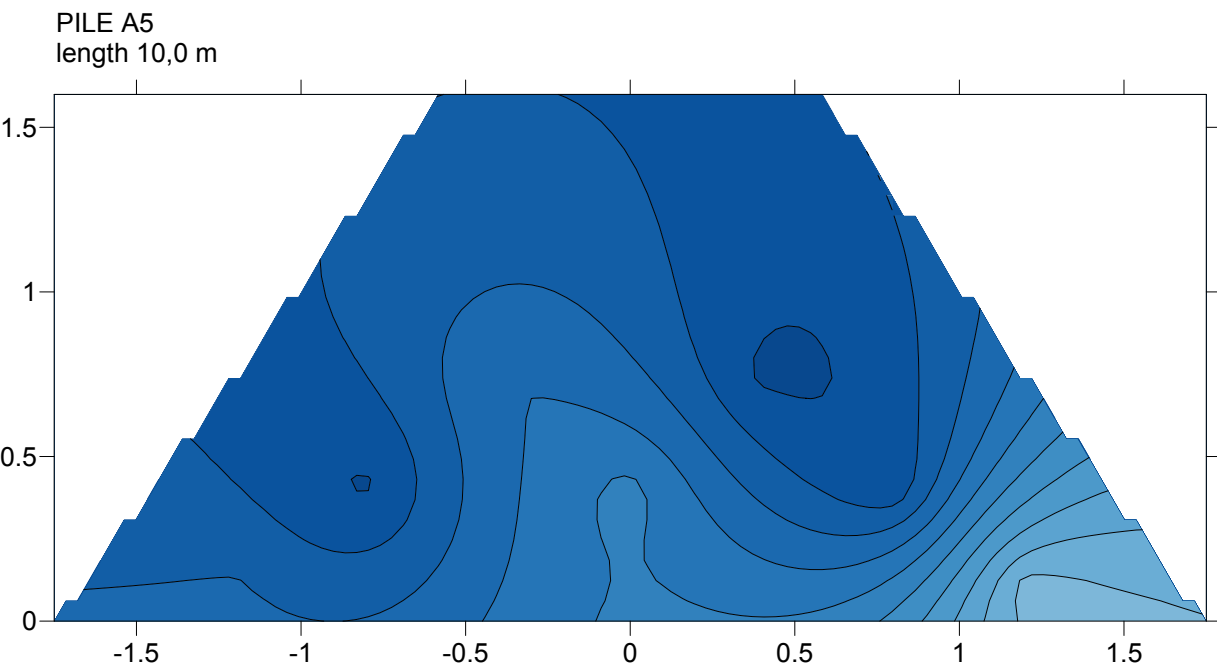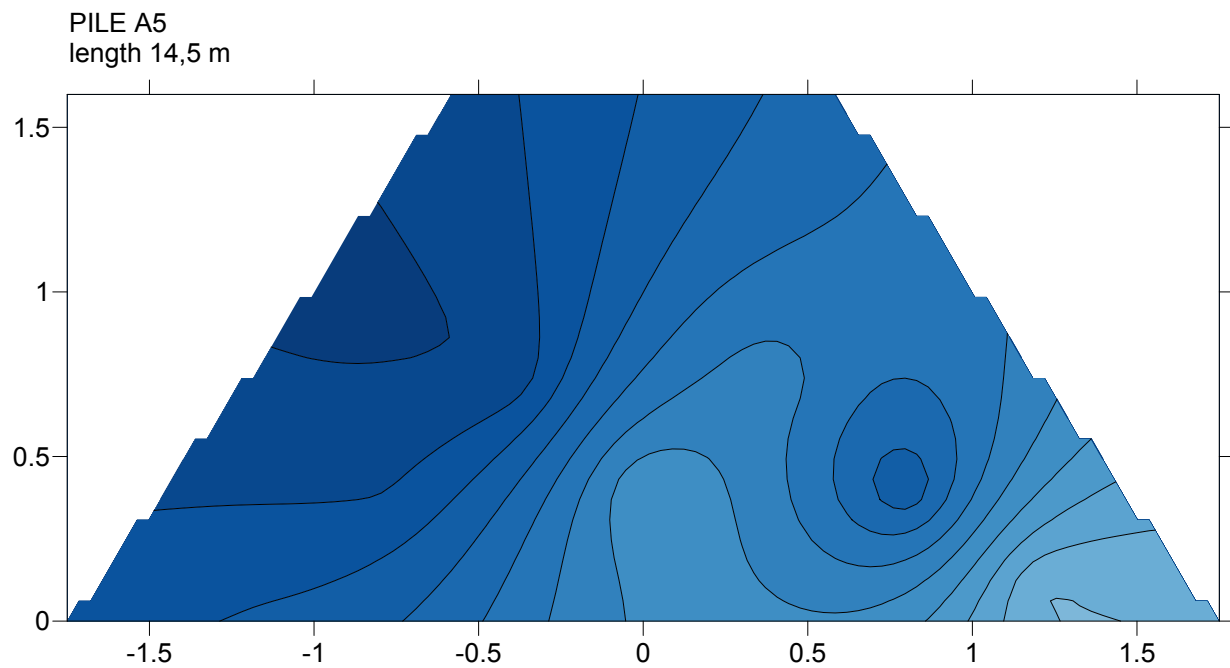

Supplement: s1 [file s1]

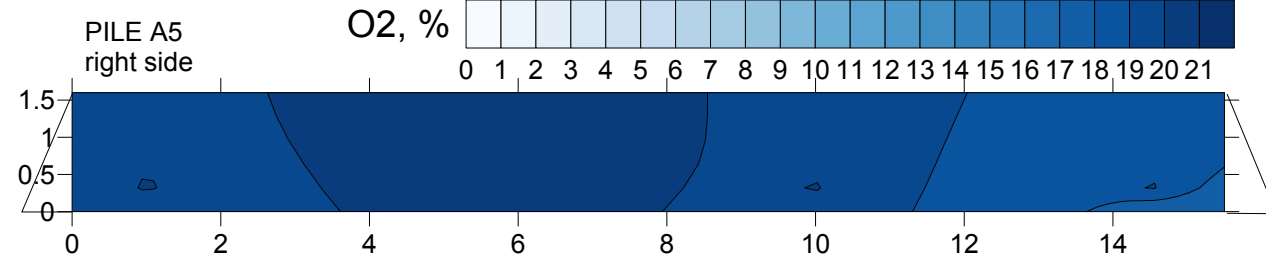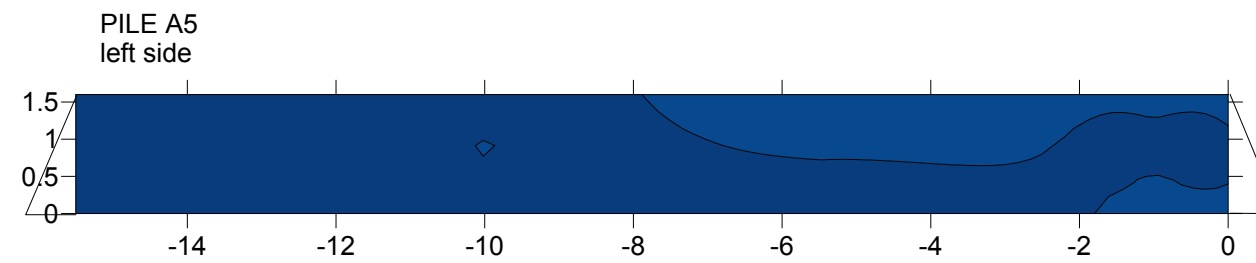

PILE A5  
length 1,0 m

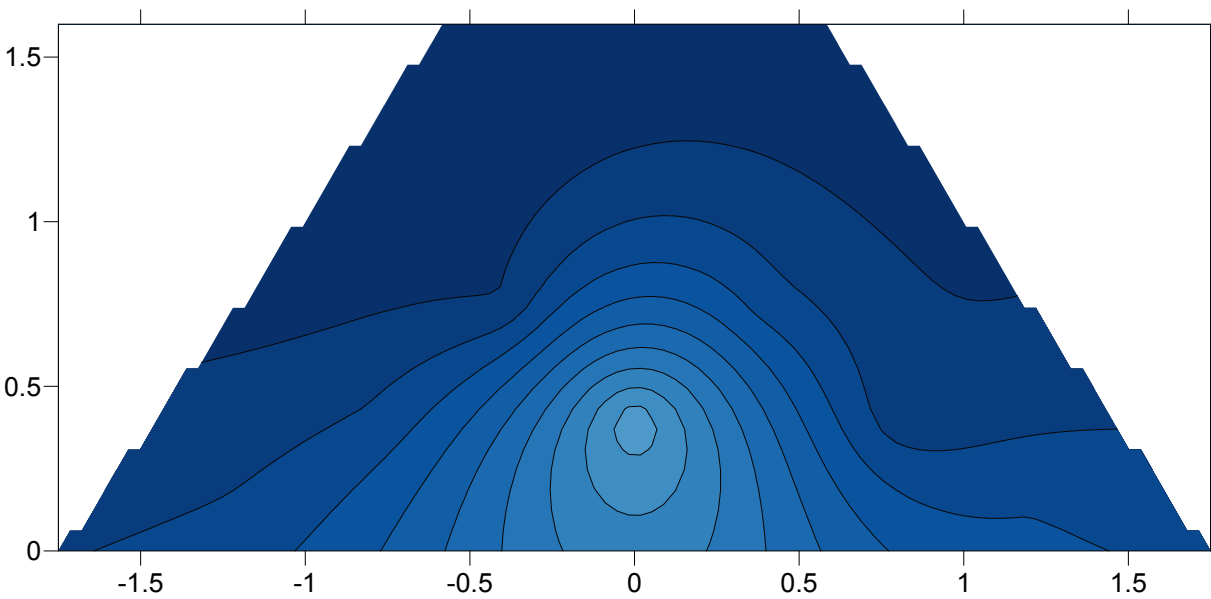

PILE A5  
length 5,5 m

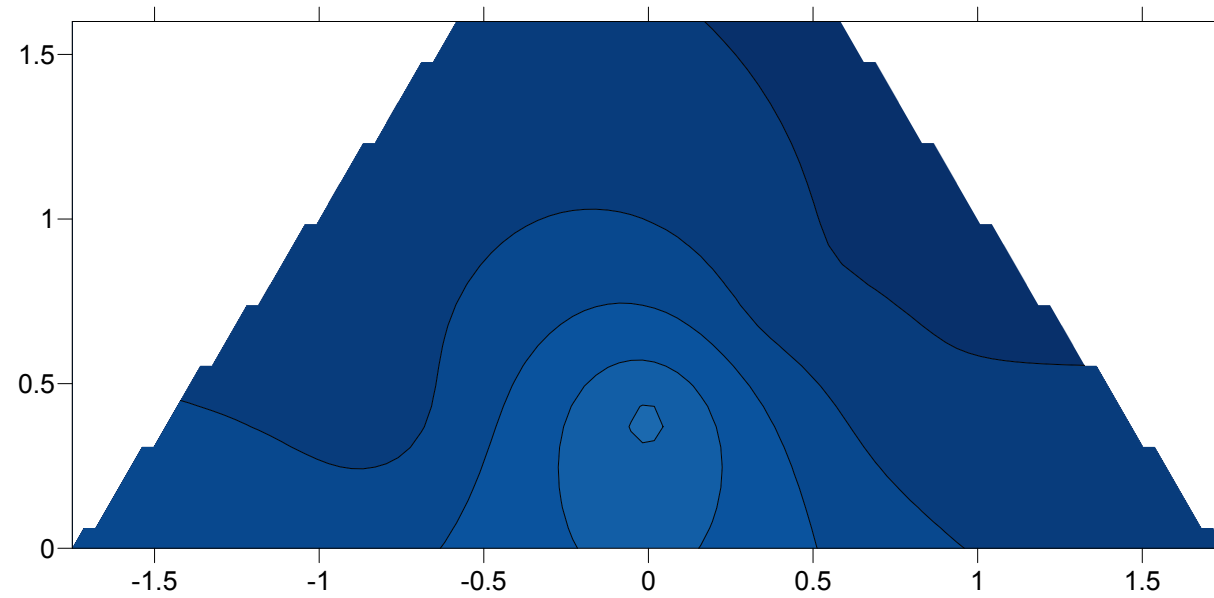

PILE A5  
length 10,0 m

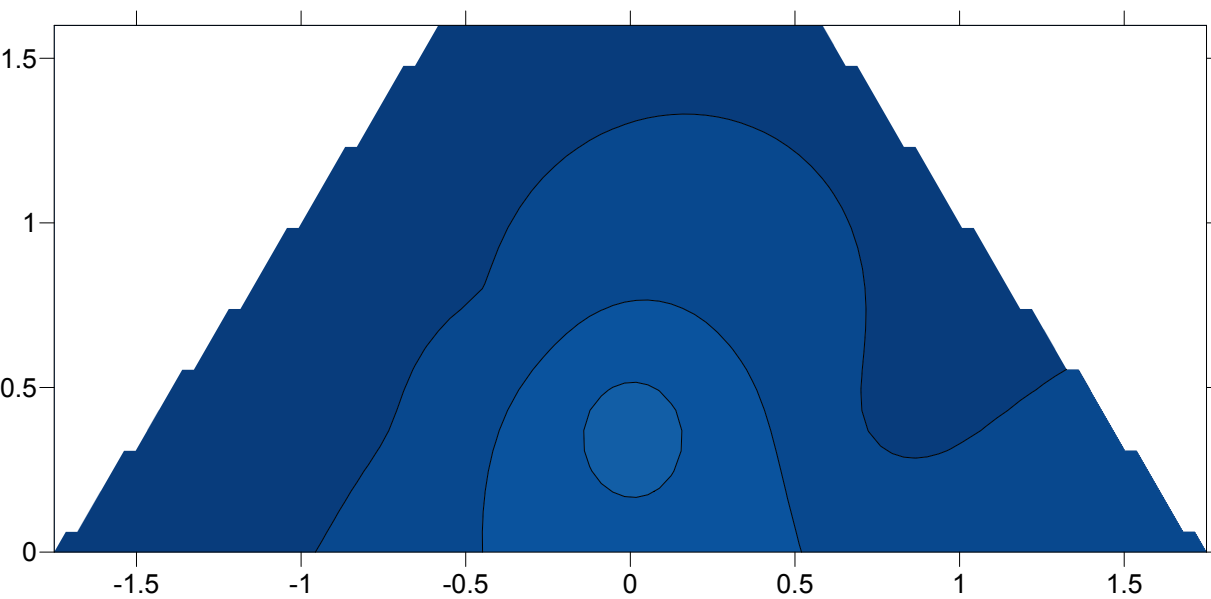

PILE A5  
length 14,5 m

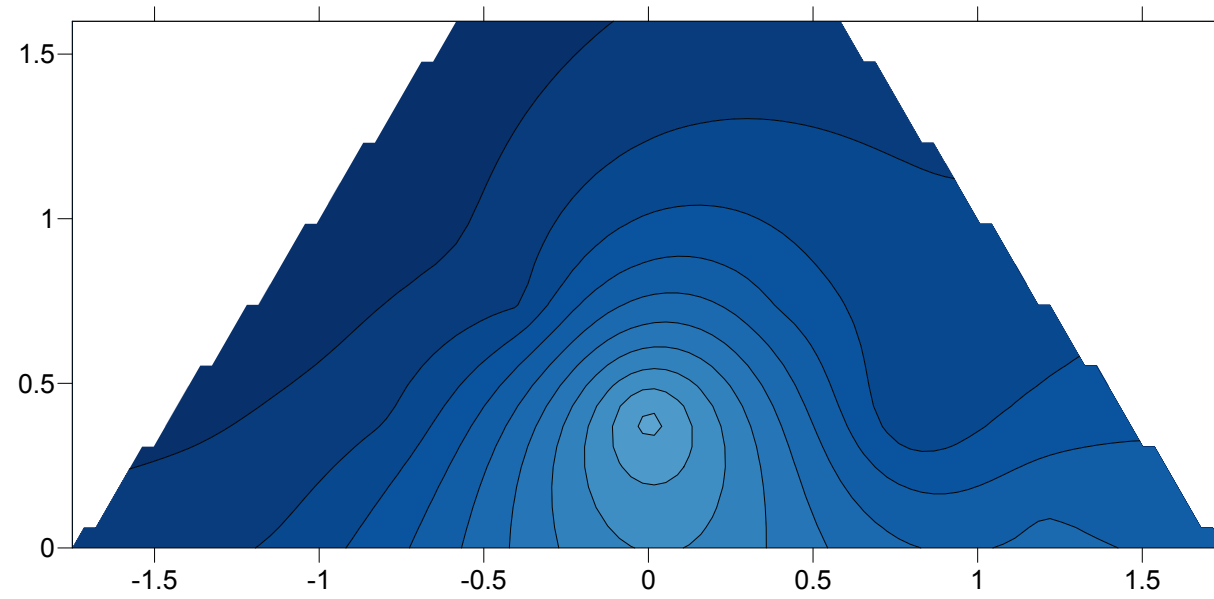

Supplement: s1 [file s1]

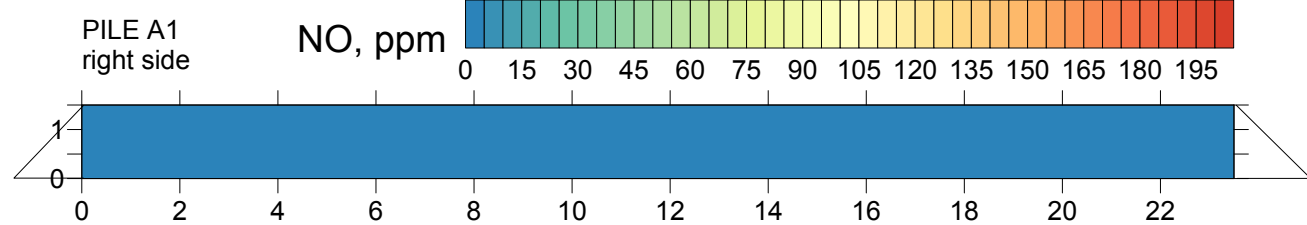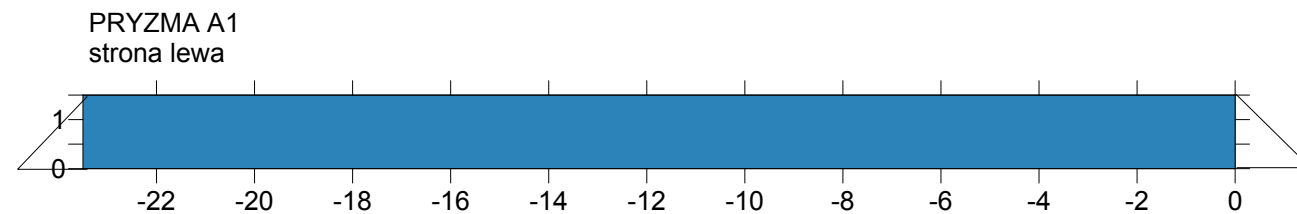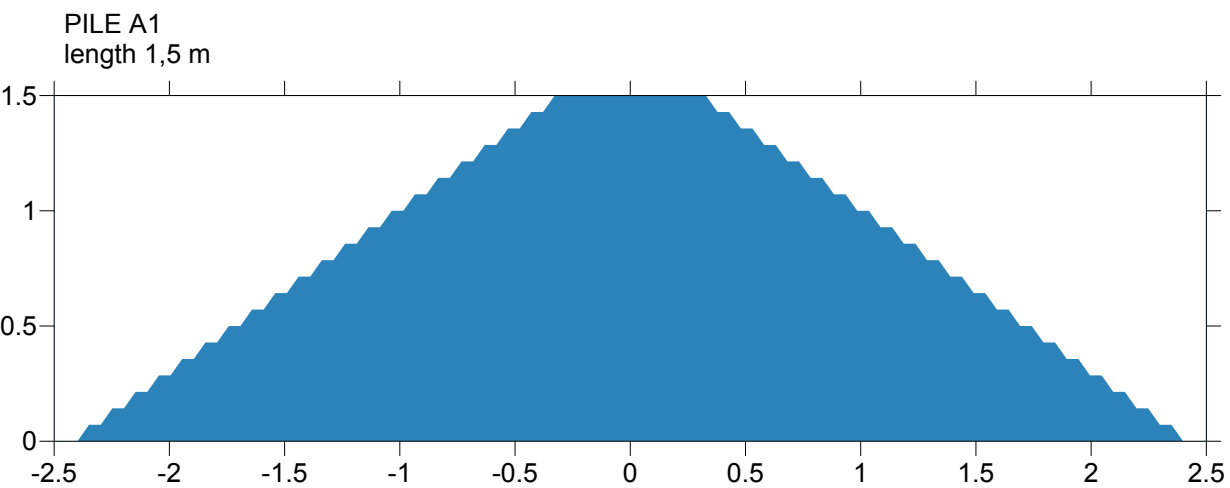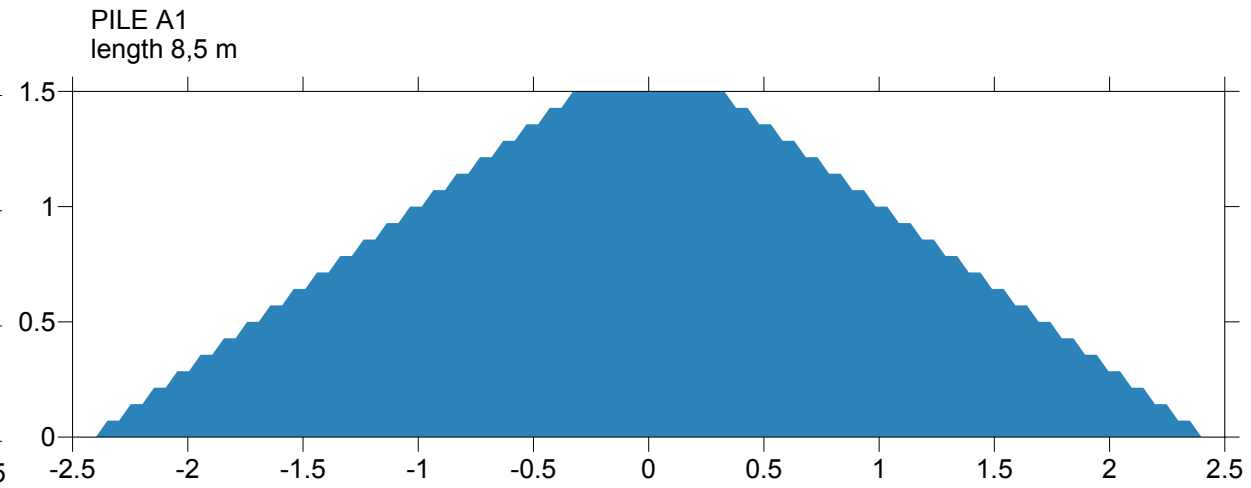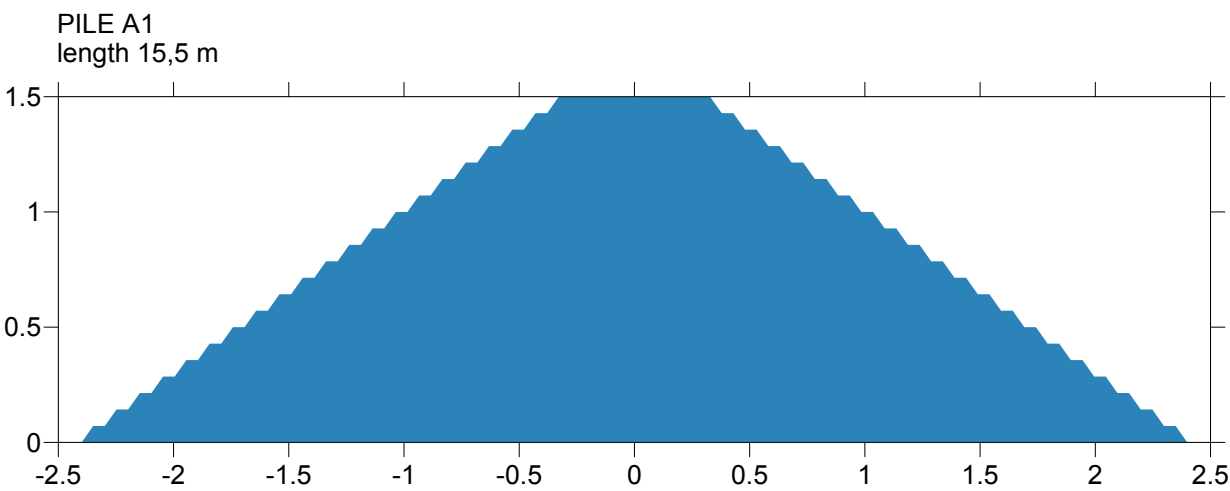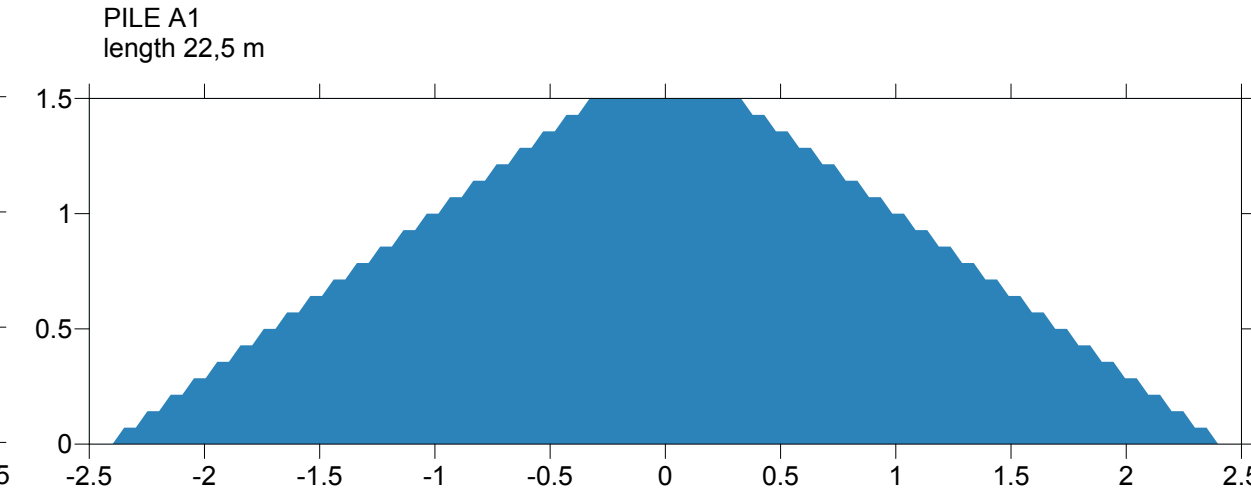

Supplement: s1 [file s1]

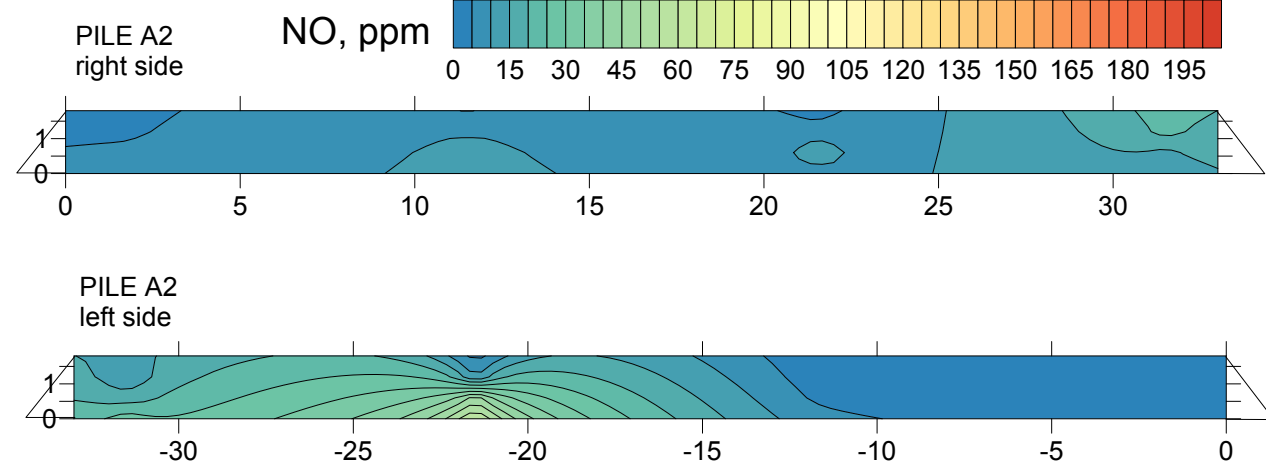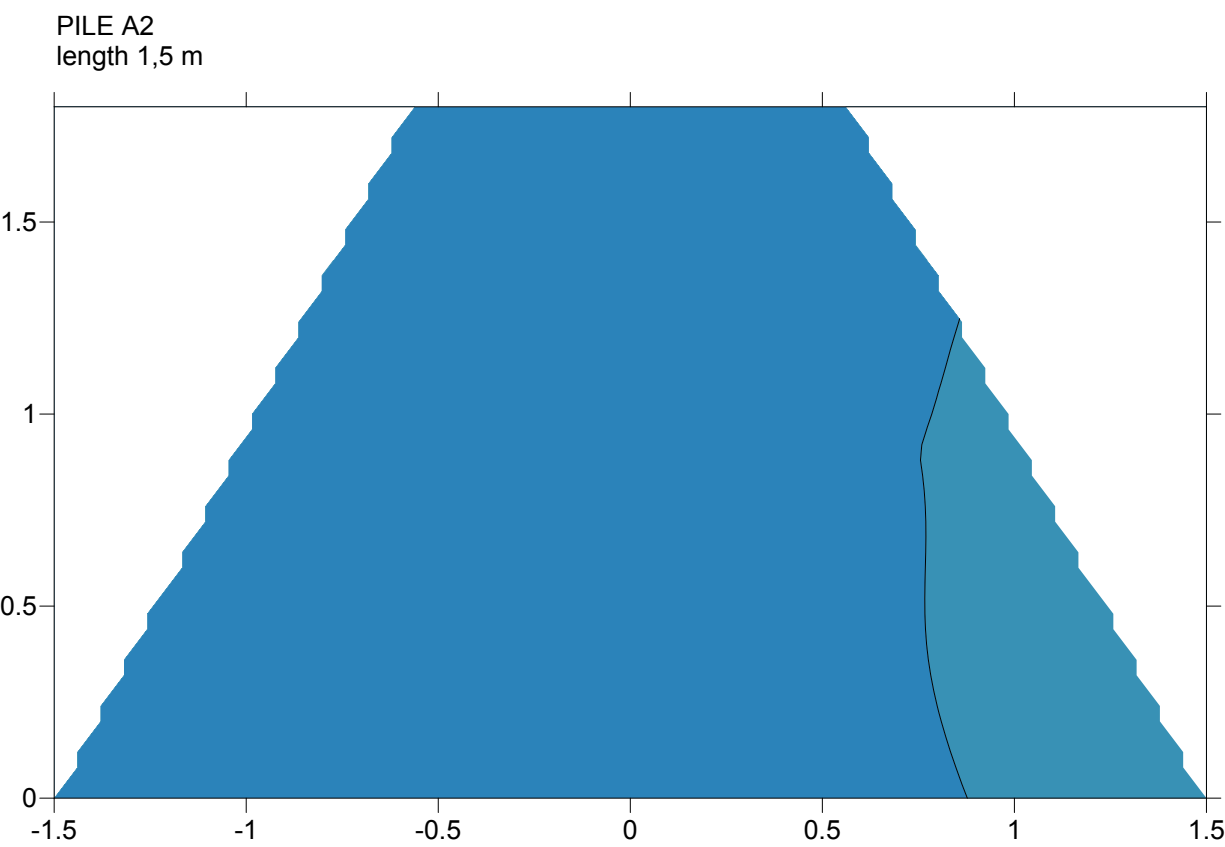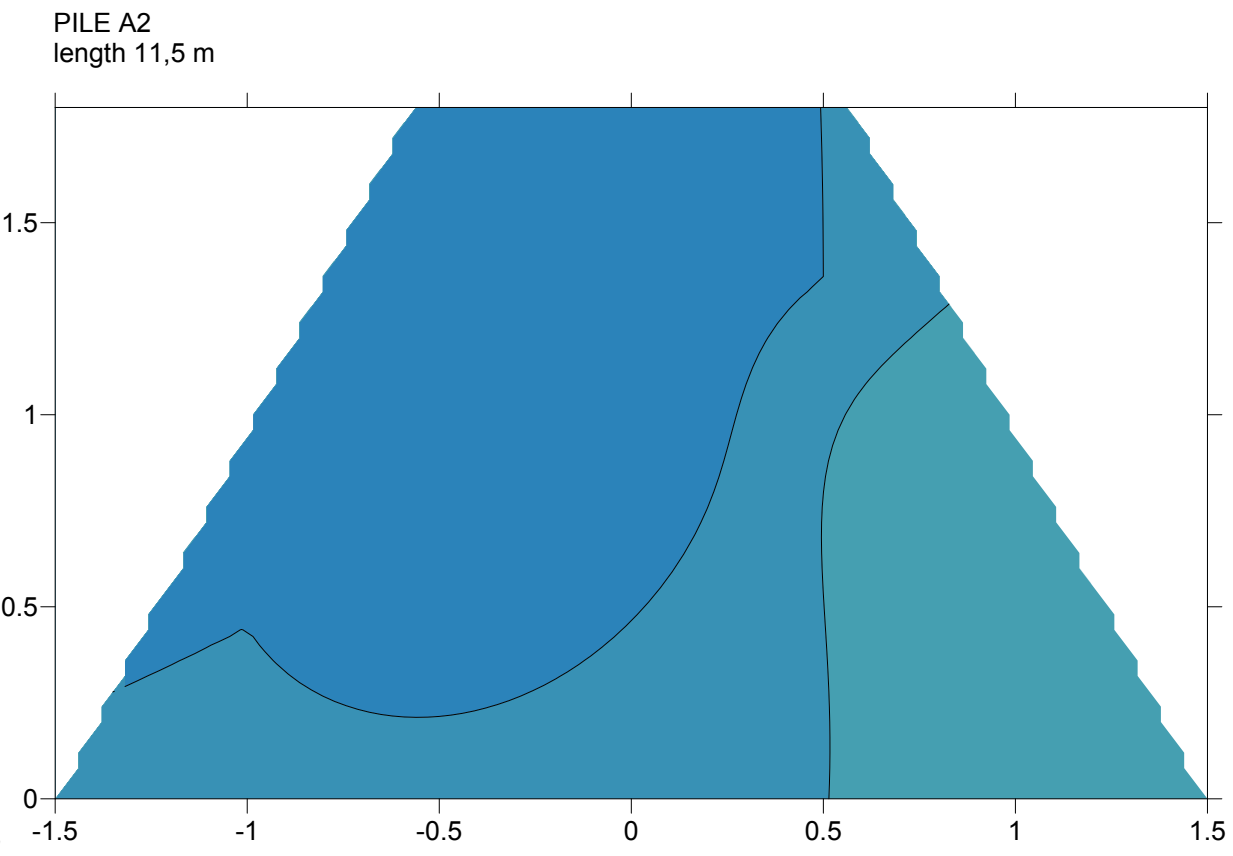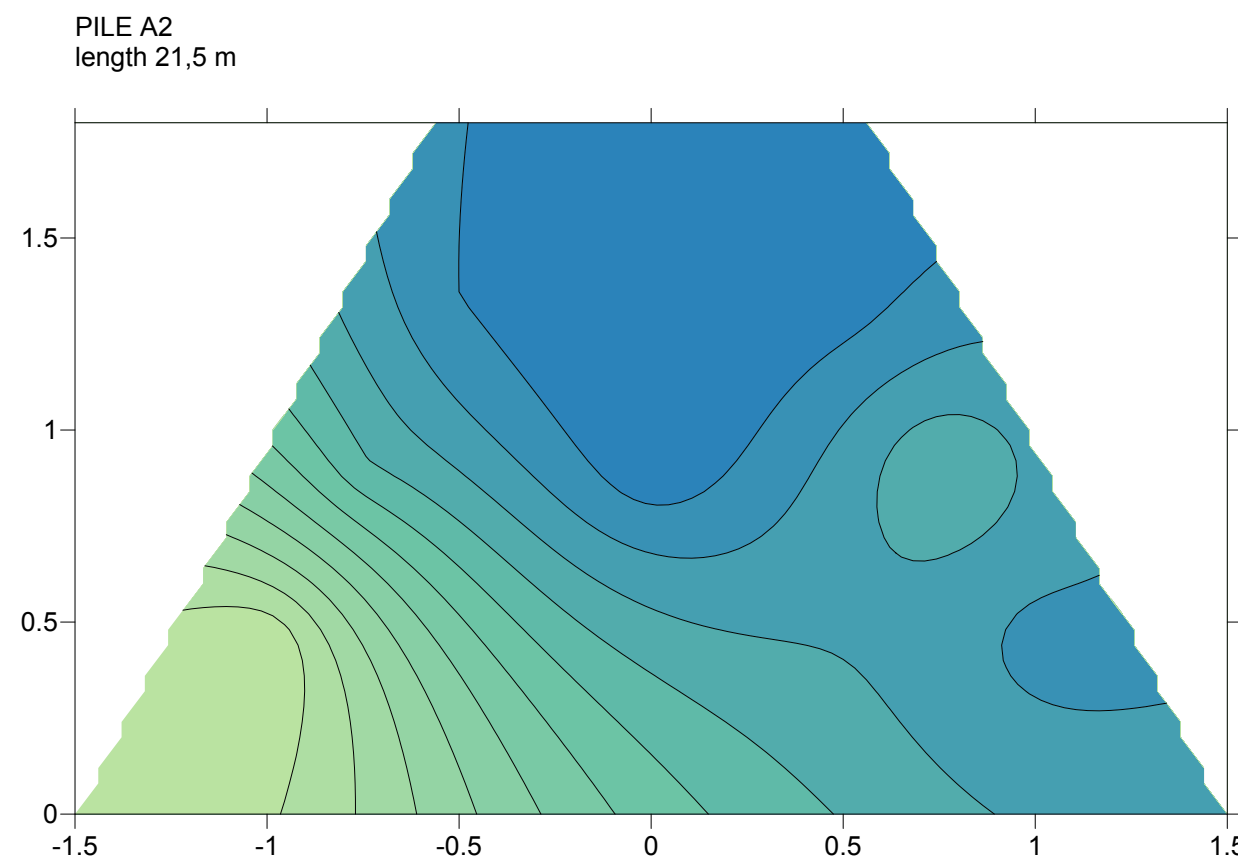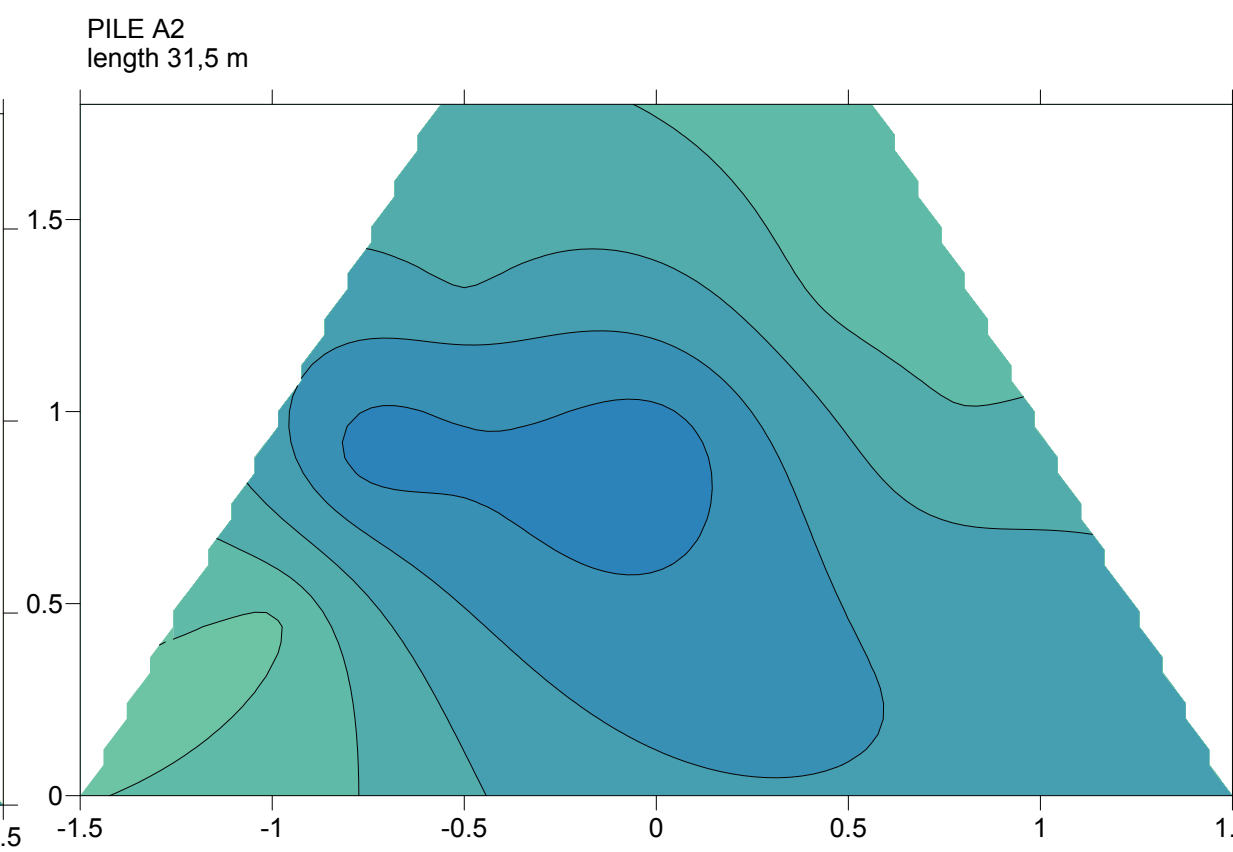

Supplement: s1 [file s1]

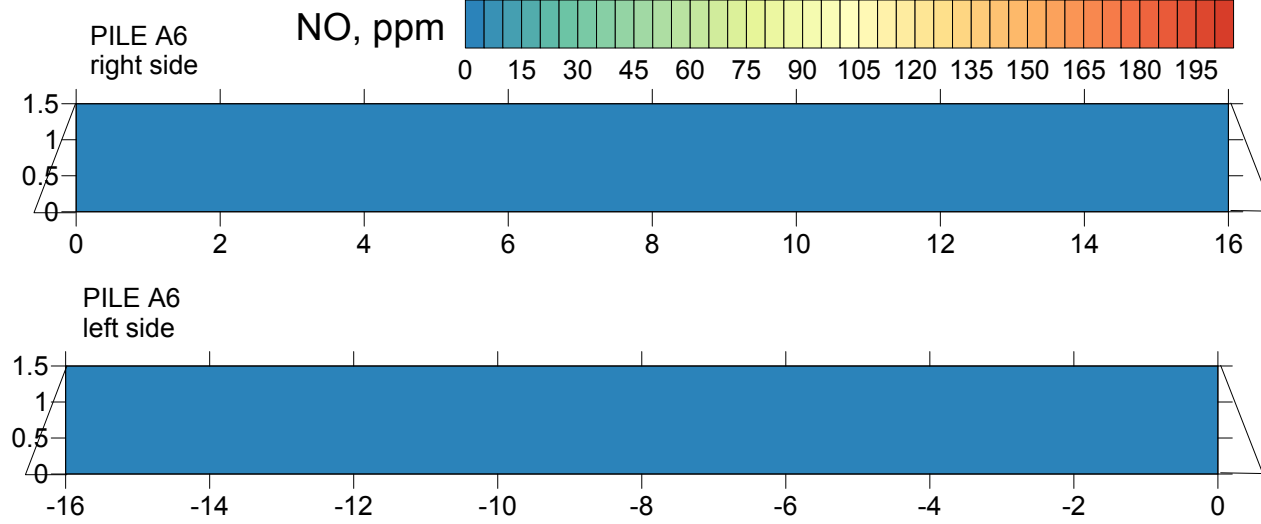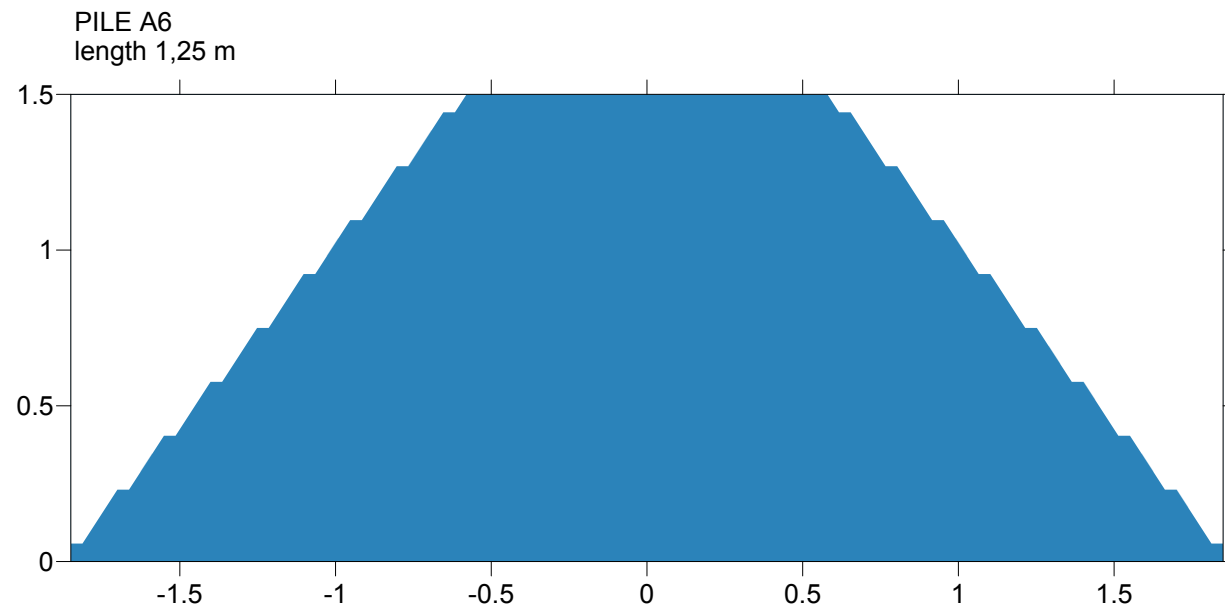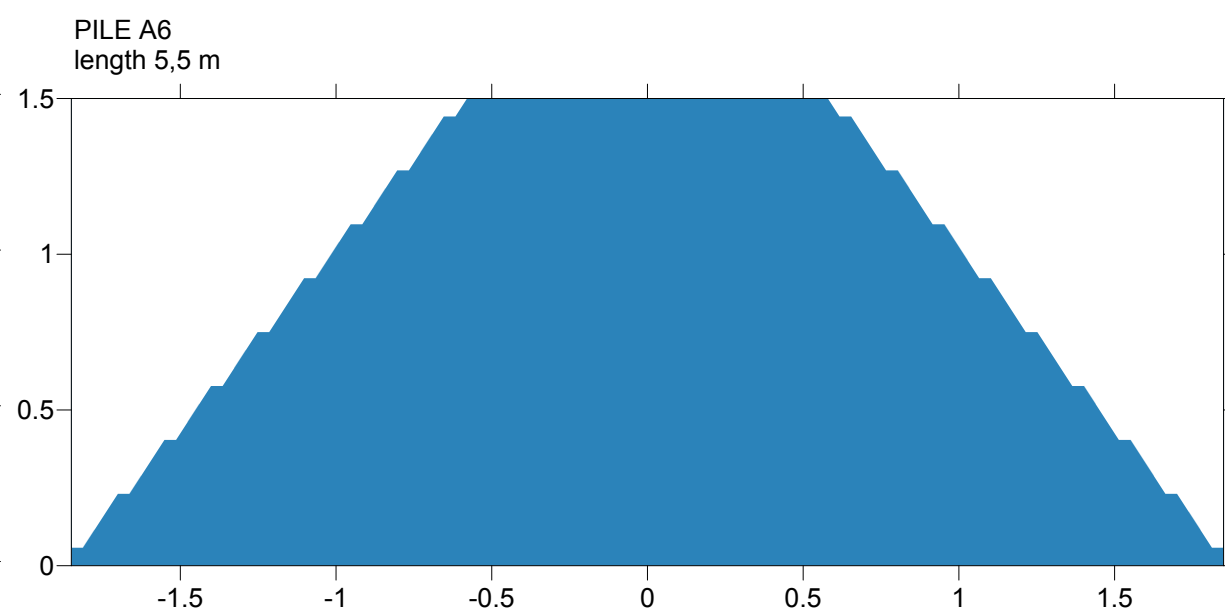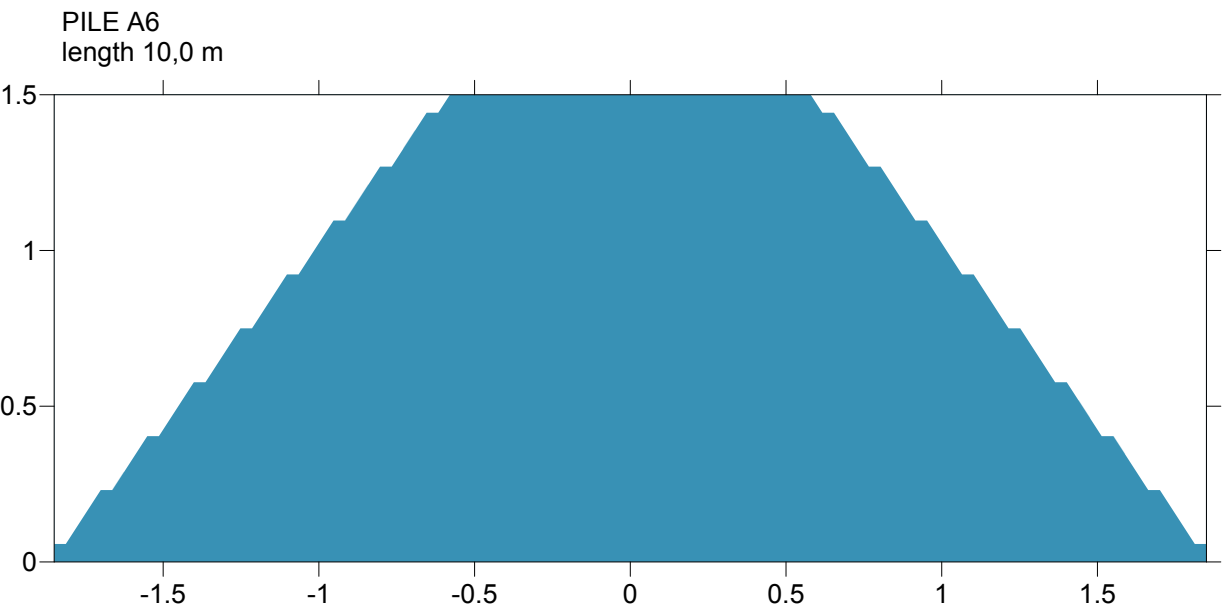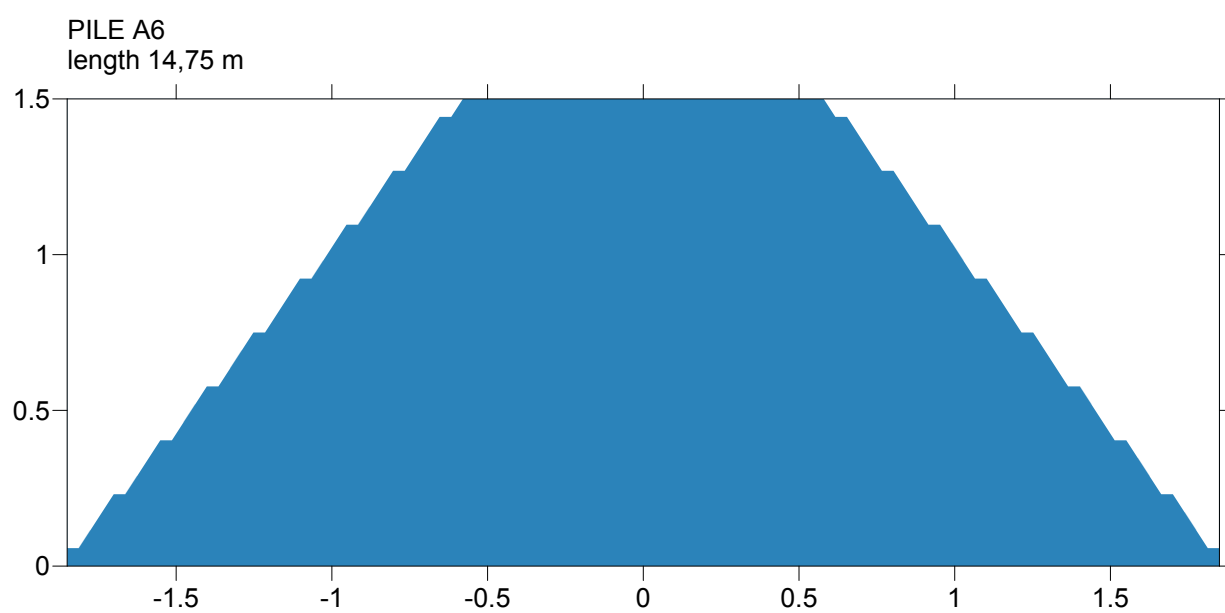

Supplement: s1 [file s1]

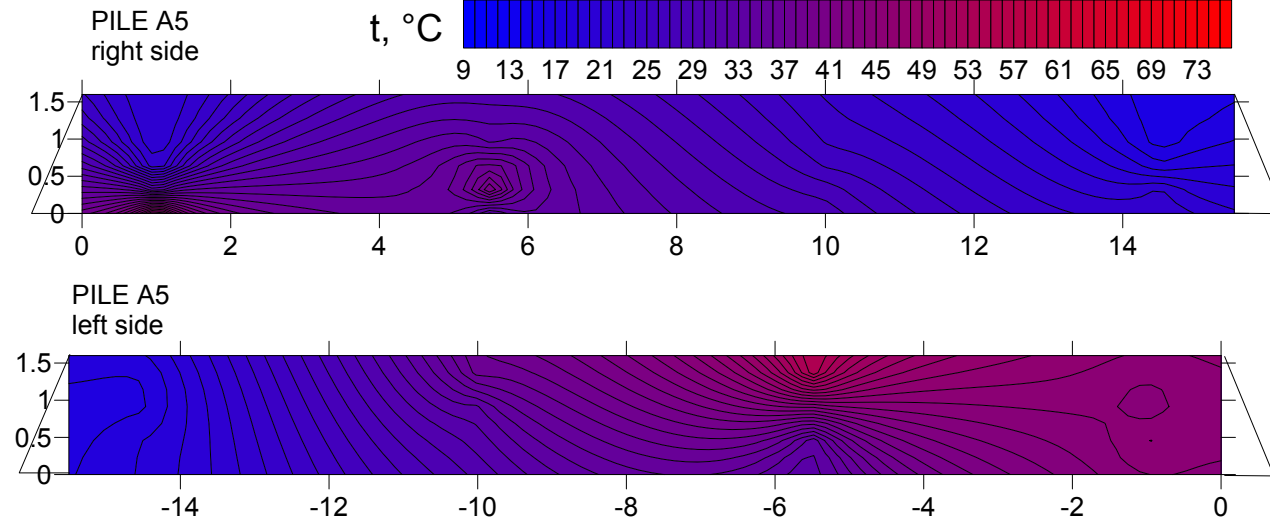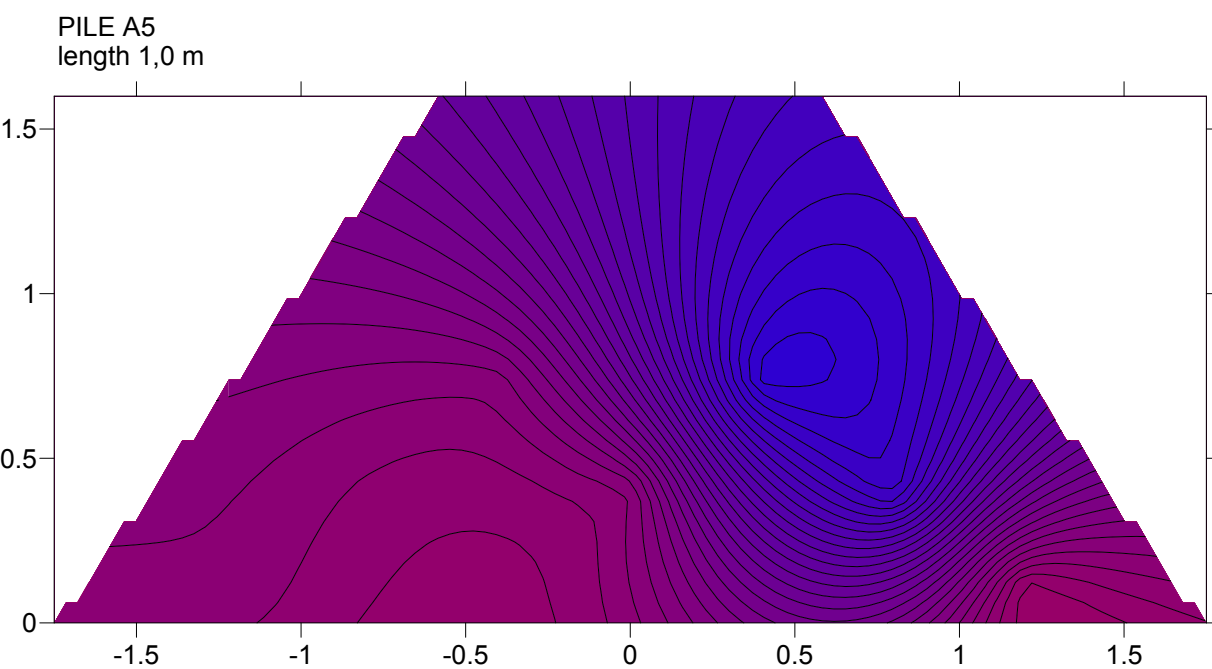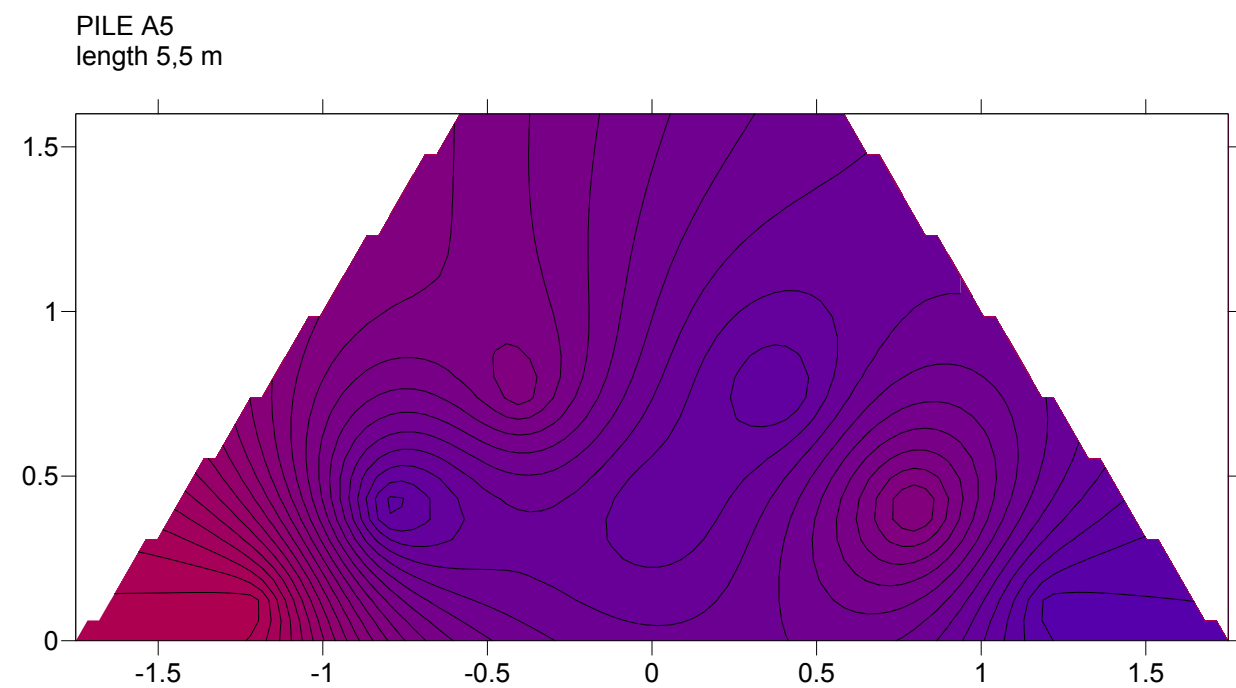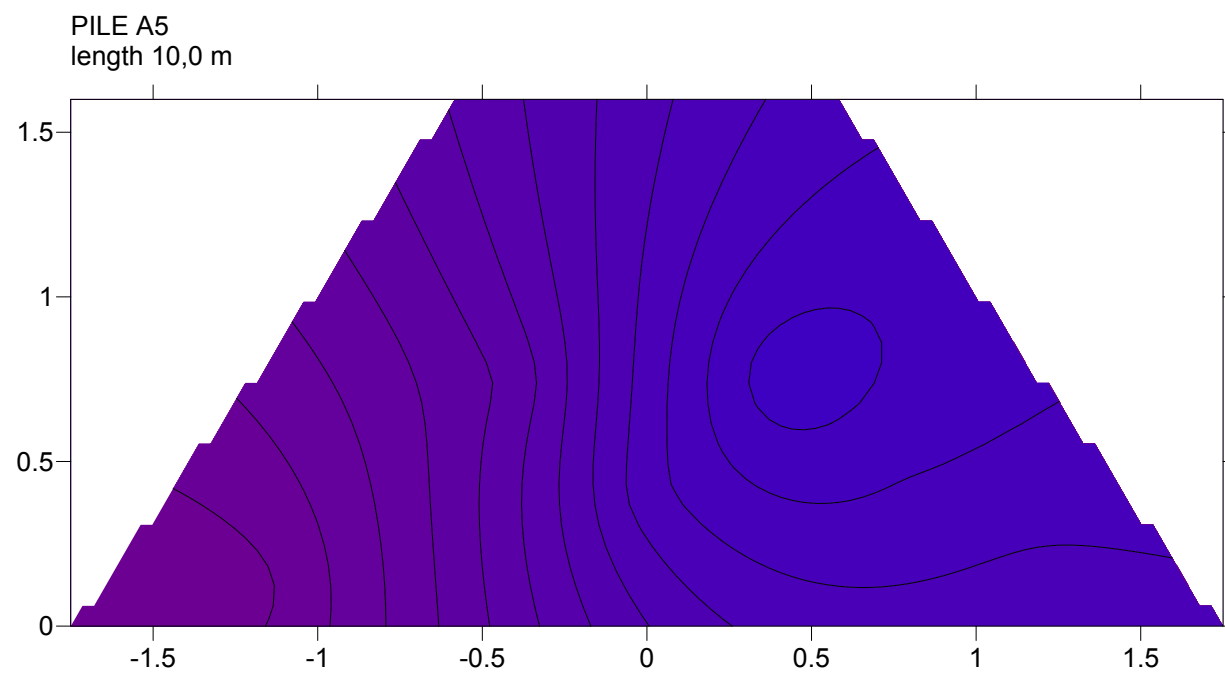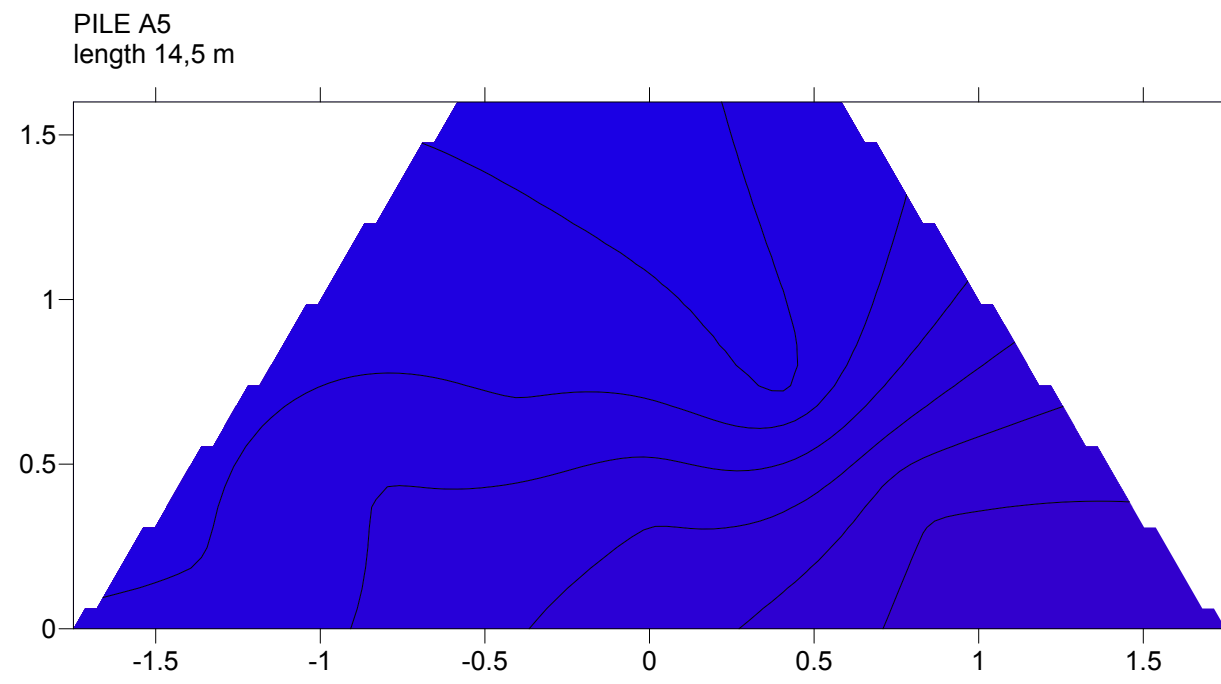

Supplement: s1 [file s1]

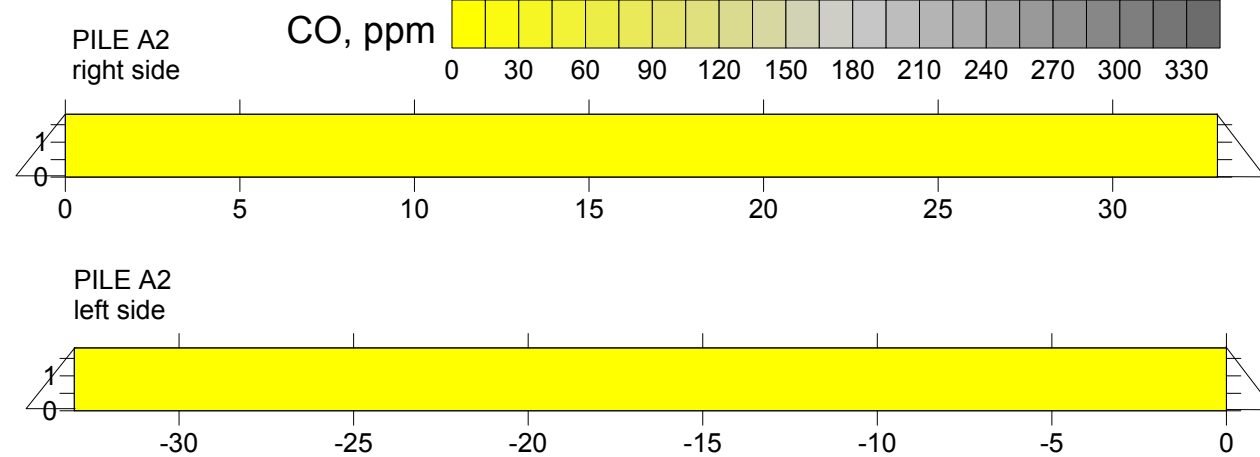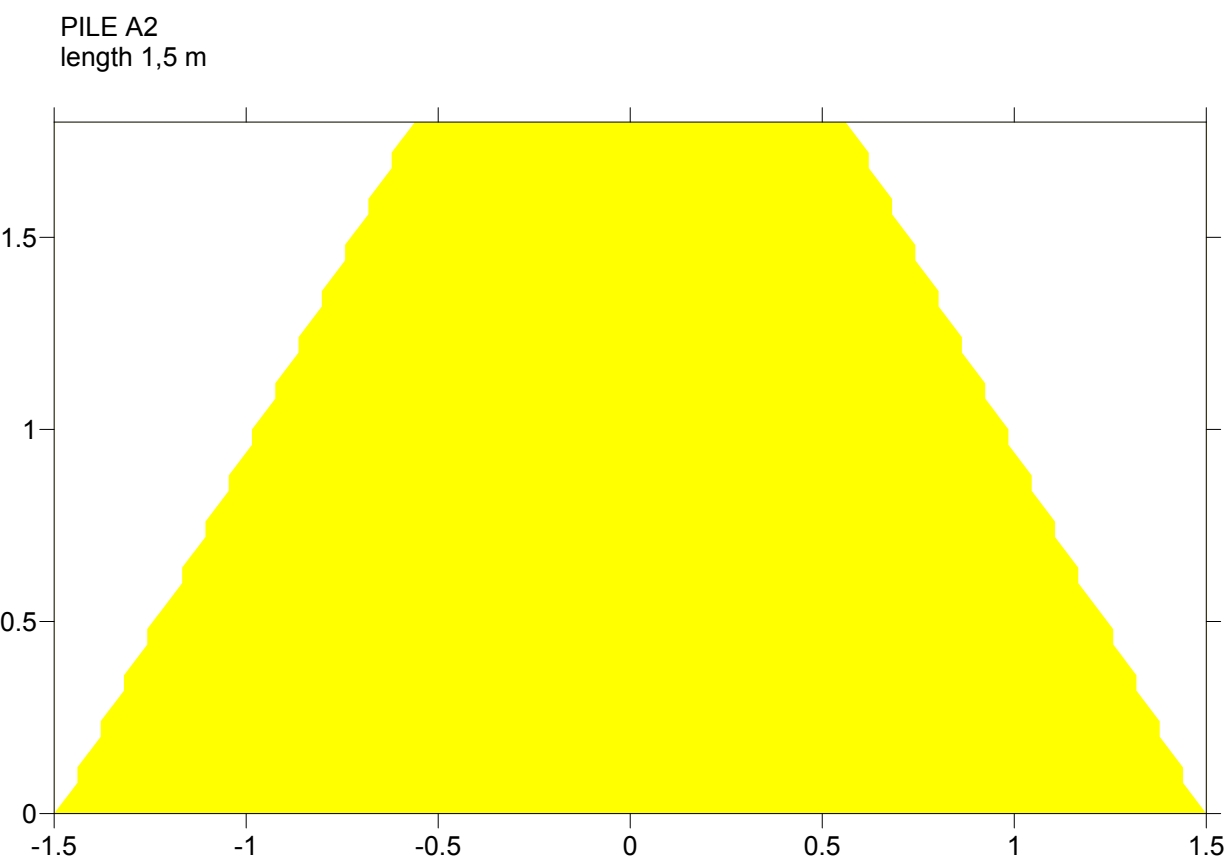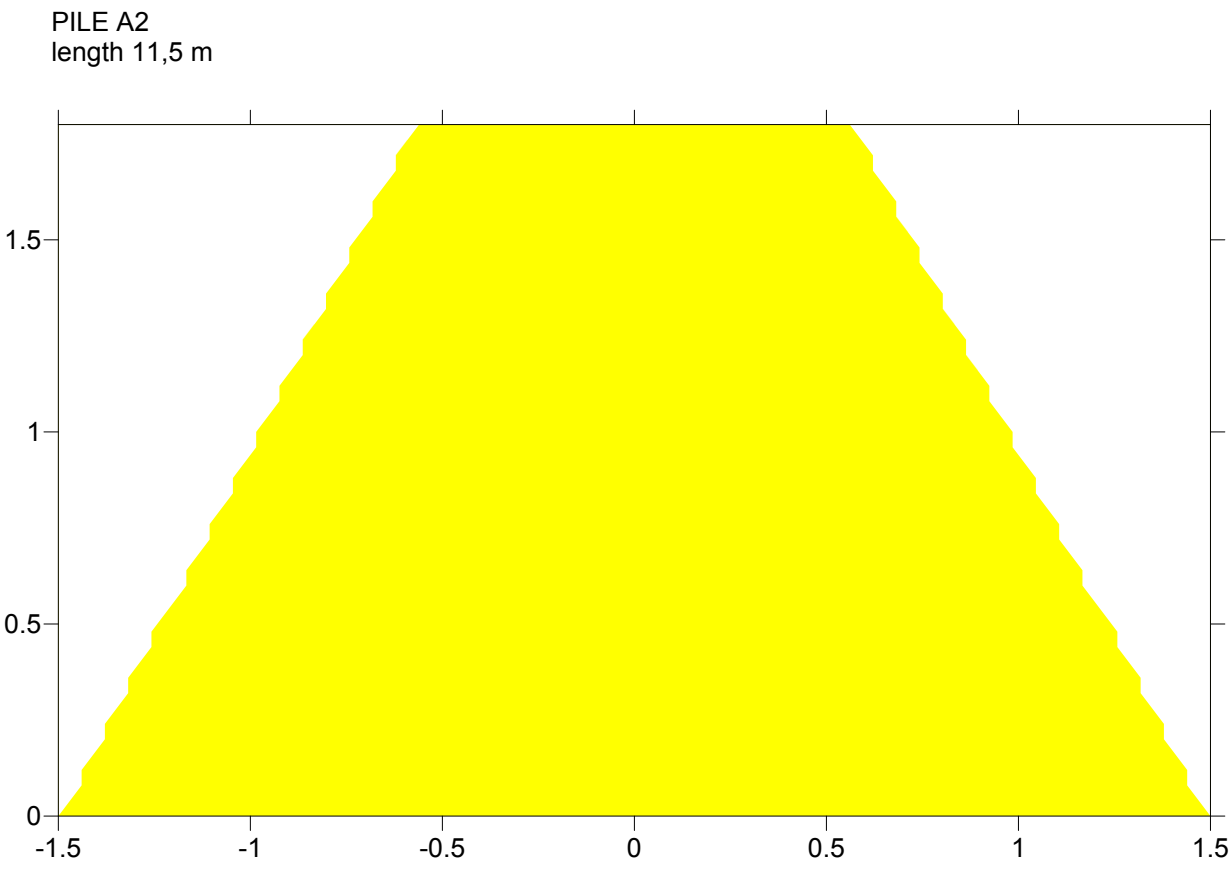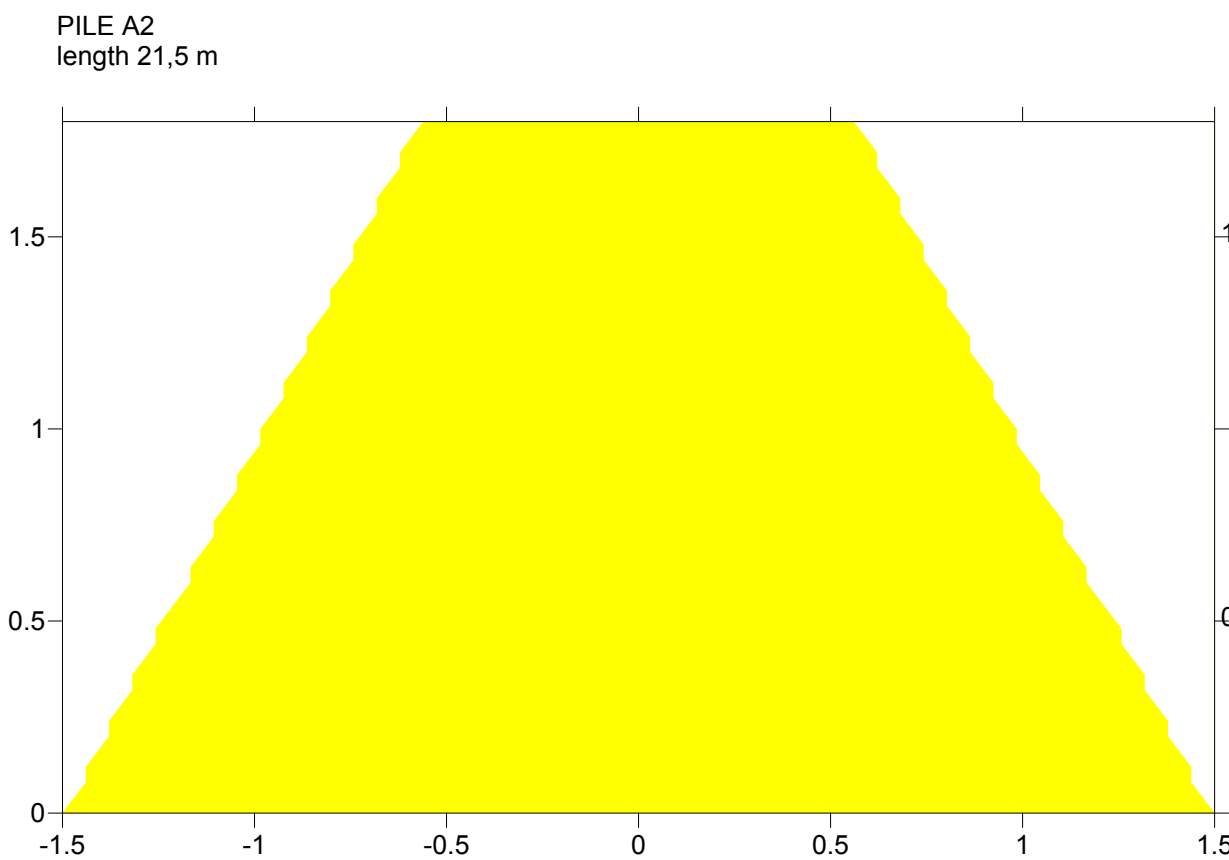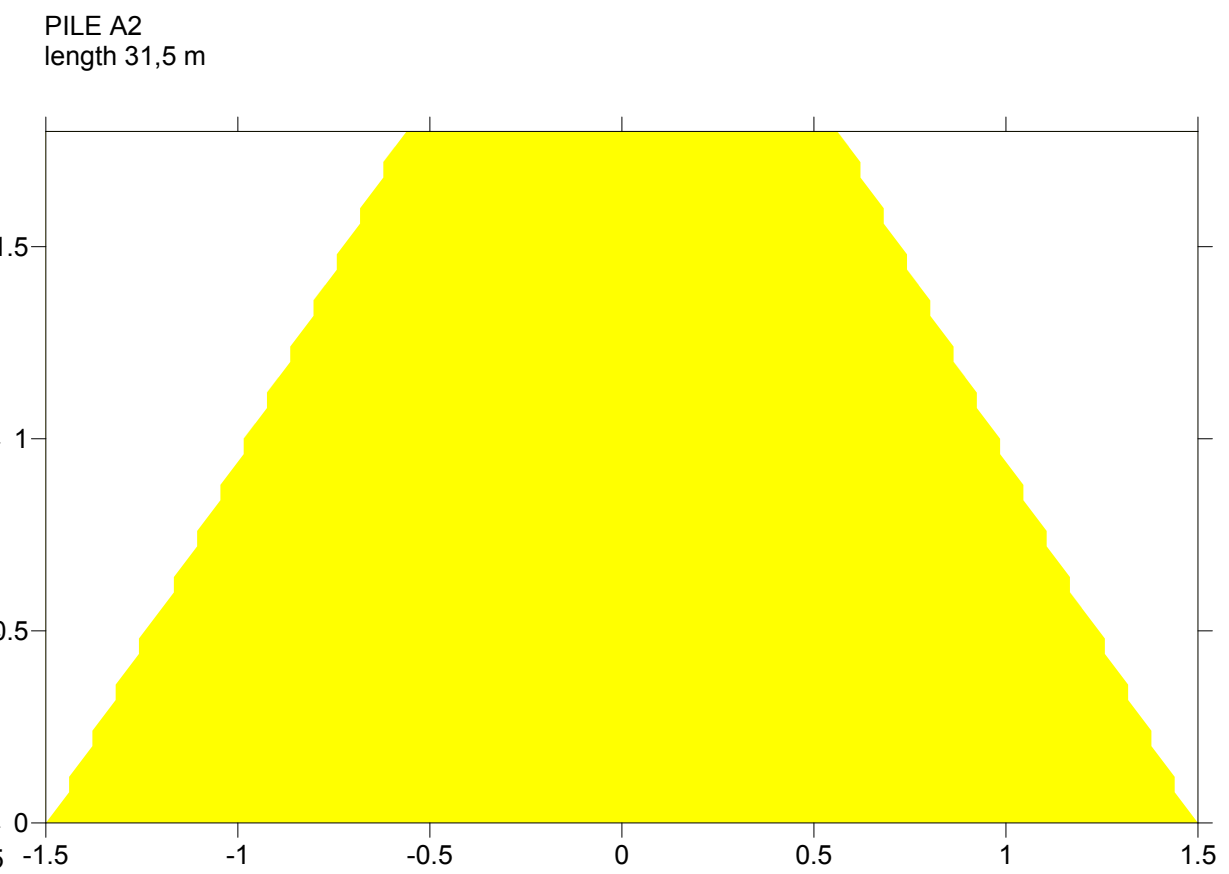

Supplement: s1 [file s1]

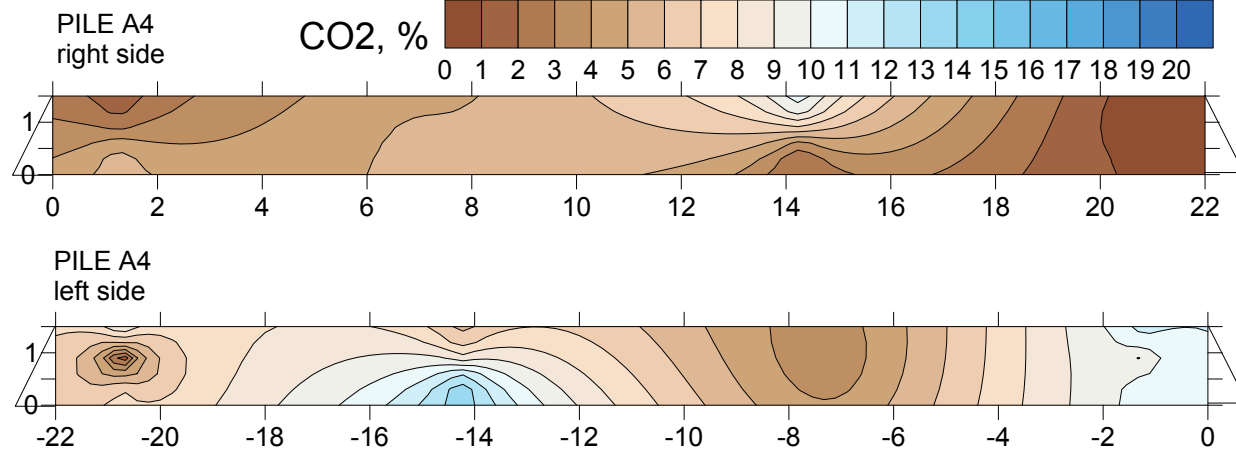

PILE A4  
length 1,25 m

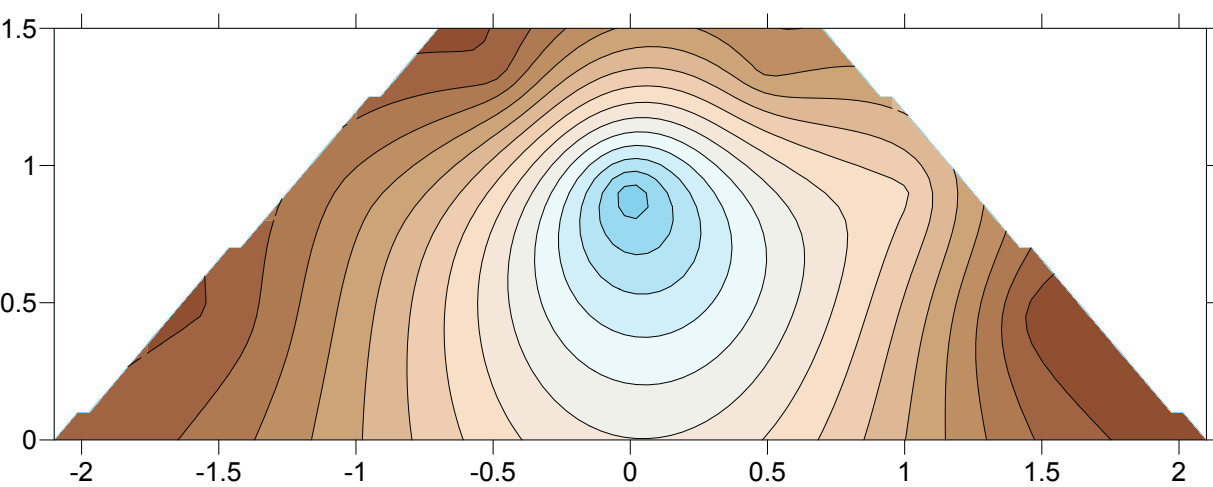

PILE A4  
length 7,25 m

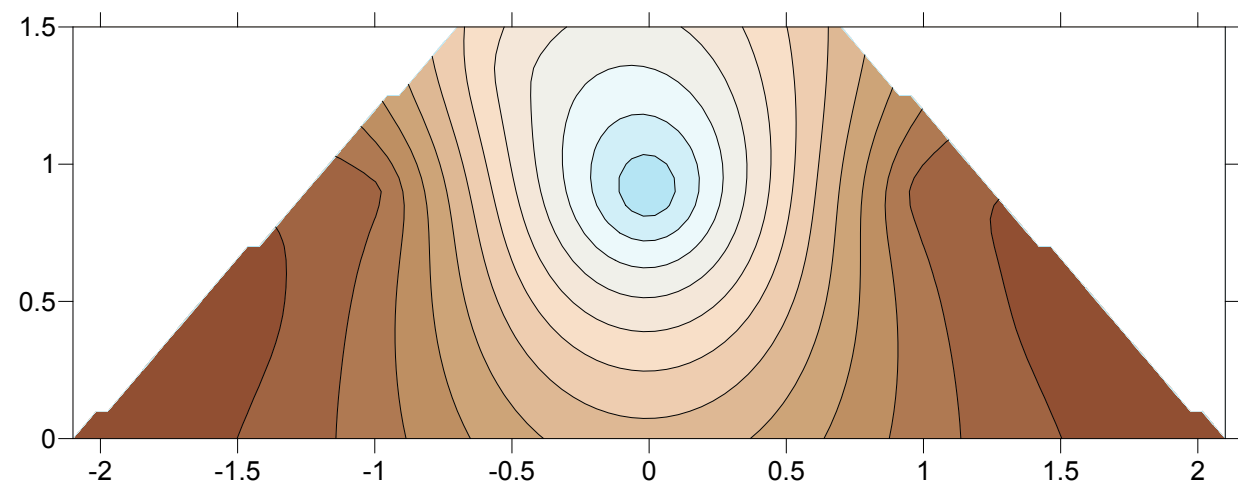

PILE A4  
length 14,25 m

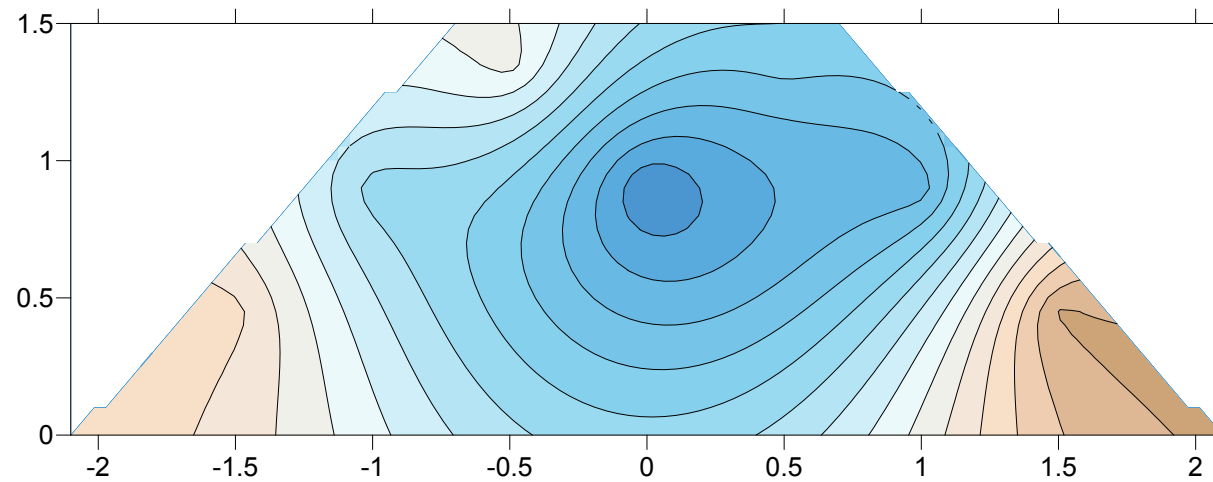

PILE A4  
length 14,25 m

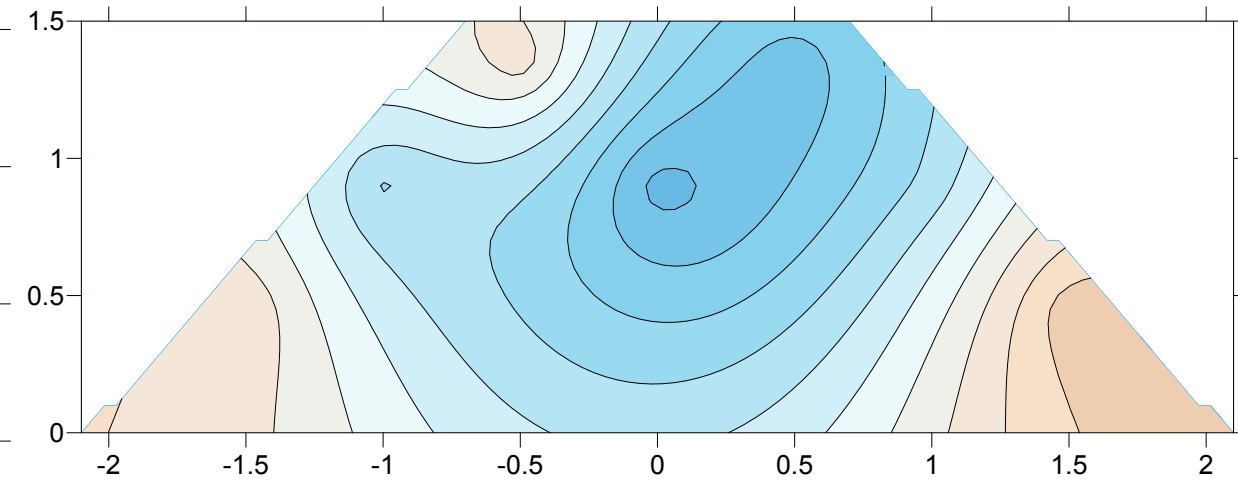

Supplement: s1 [file s1]

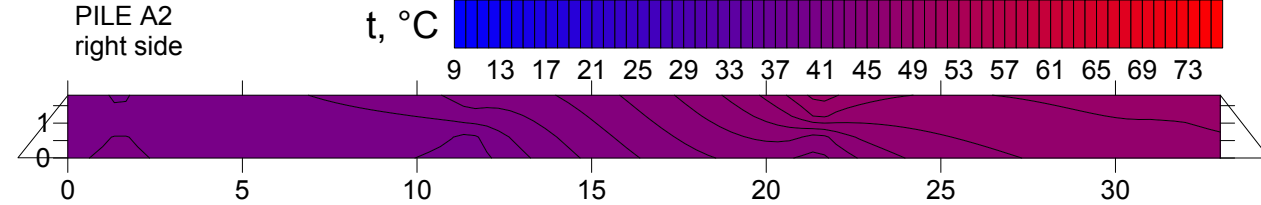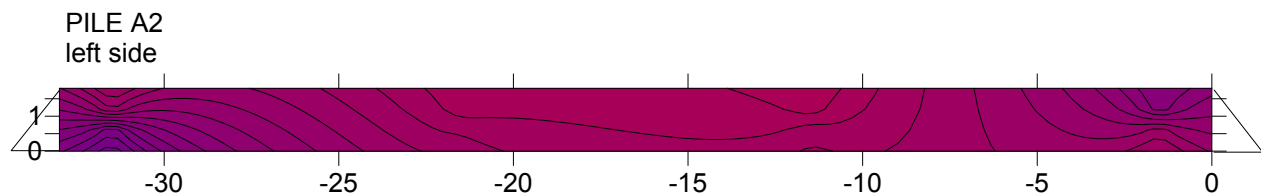

PILE A2  
length 1,5 m

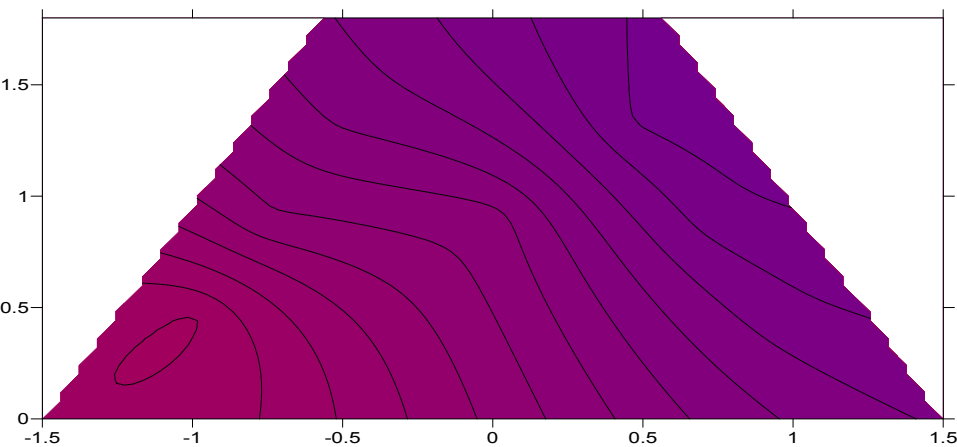

PILE A2  
length 21,5 m

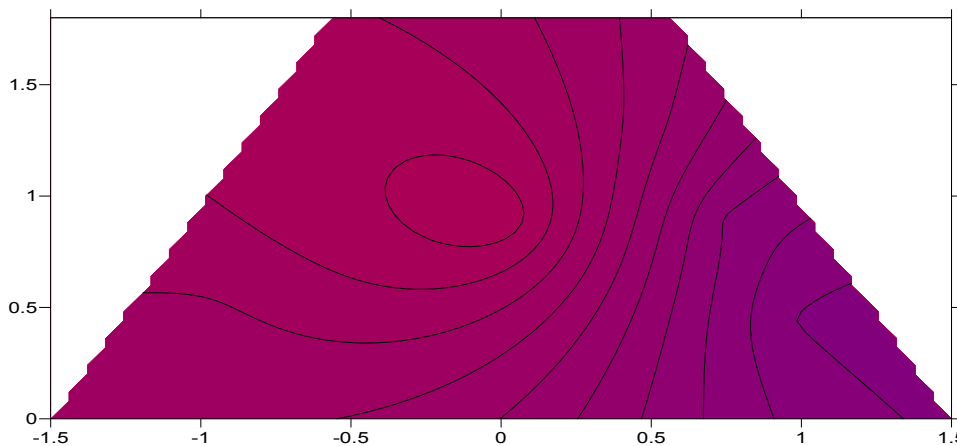

PILE A2  
length 11,5 m

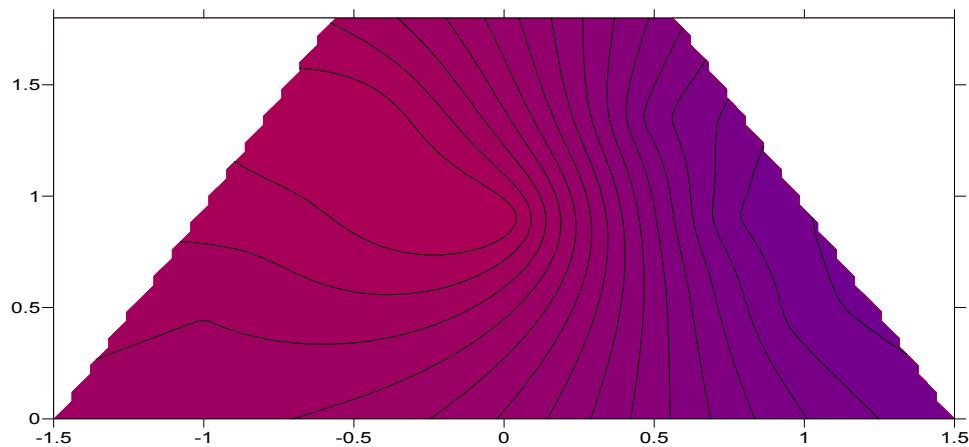

PILE A2  
length 31,5 m

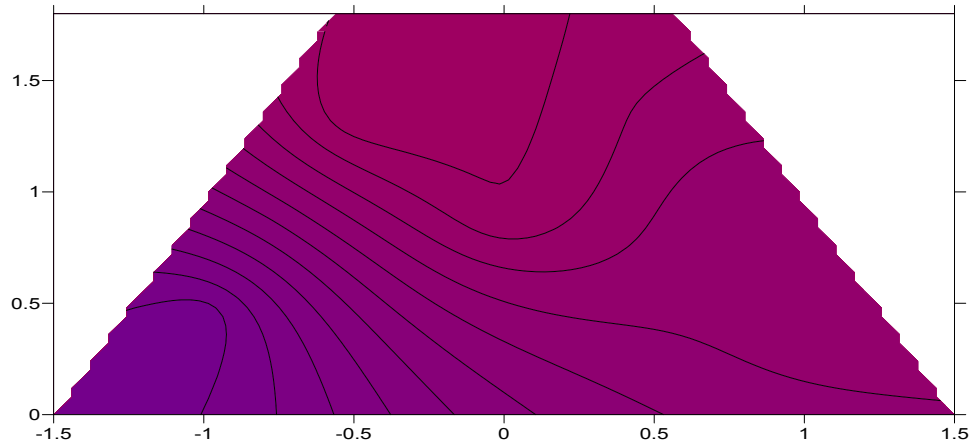

Supplement: s1 [file s1]

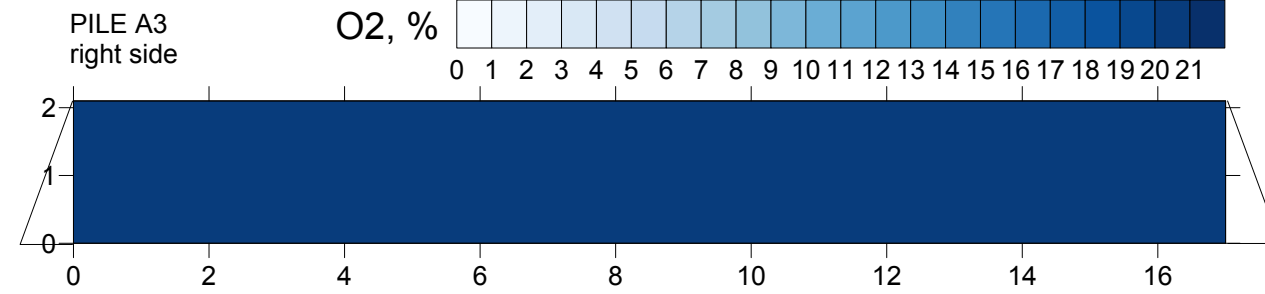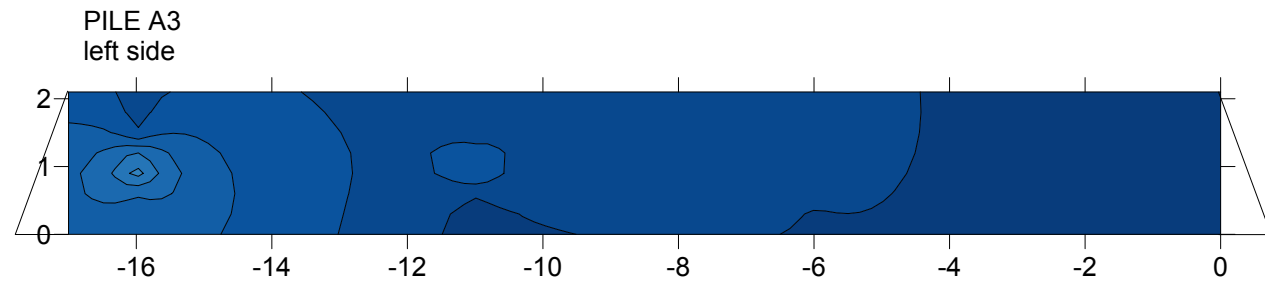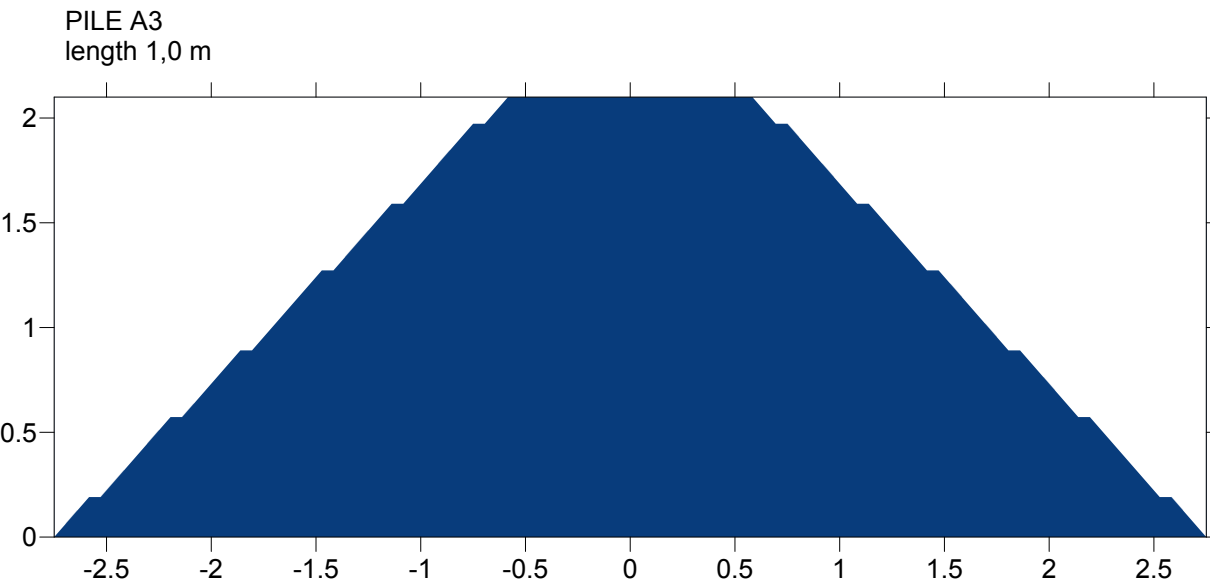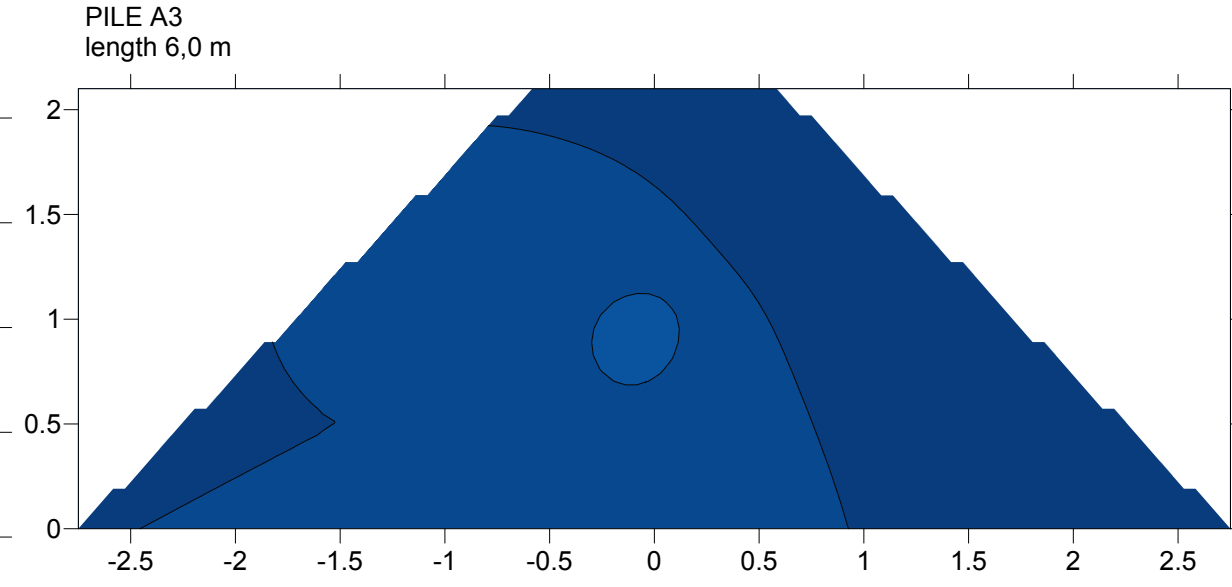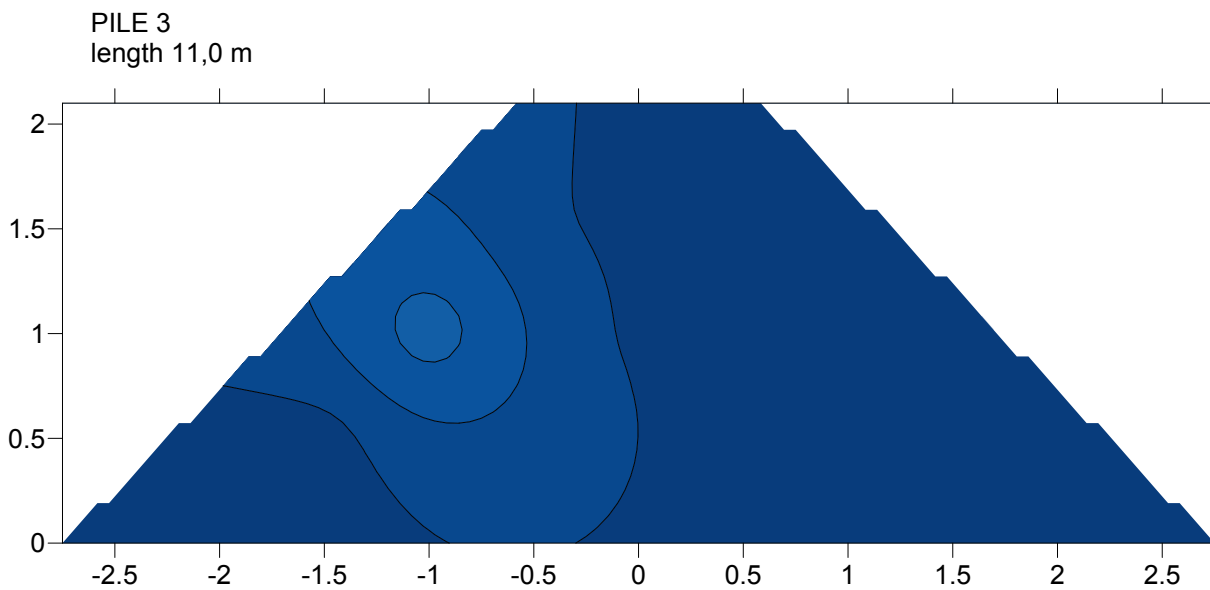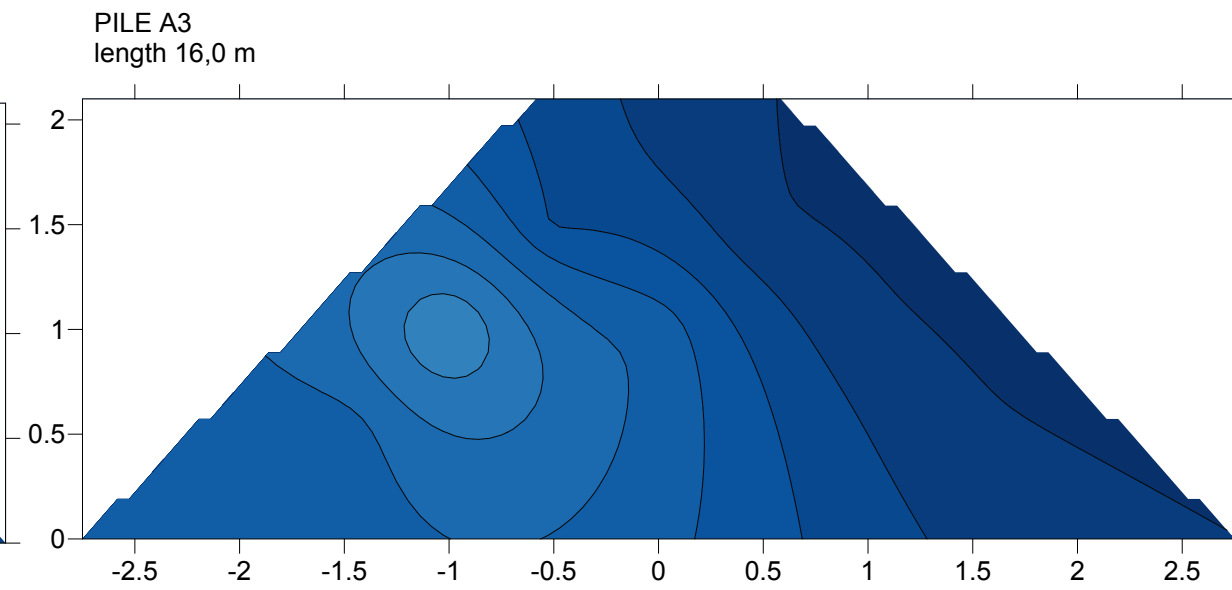

Supplement: s1 [file s1]

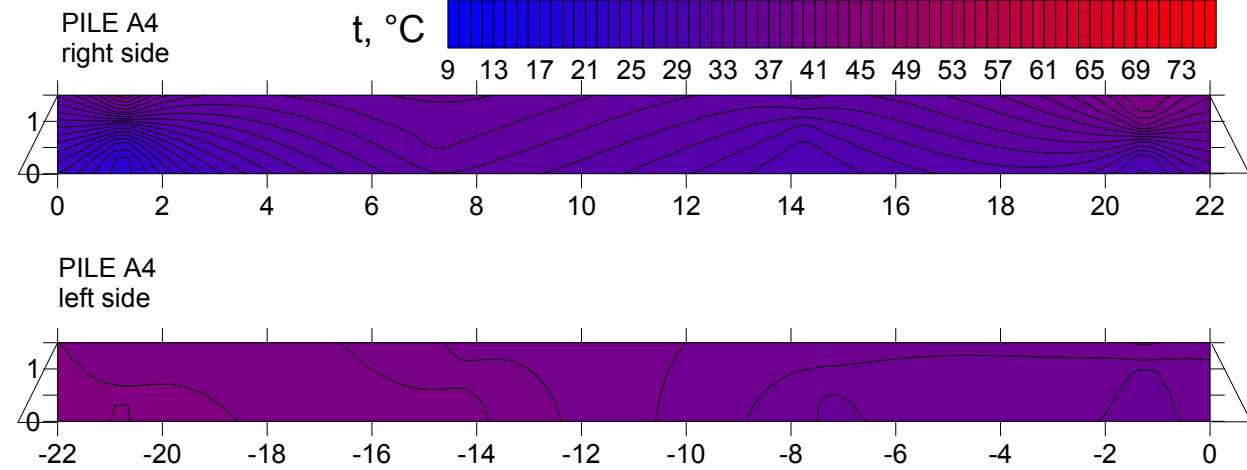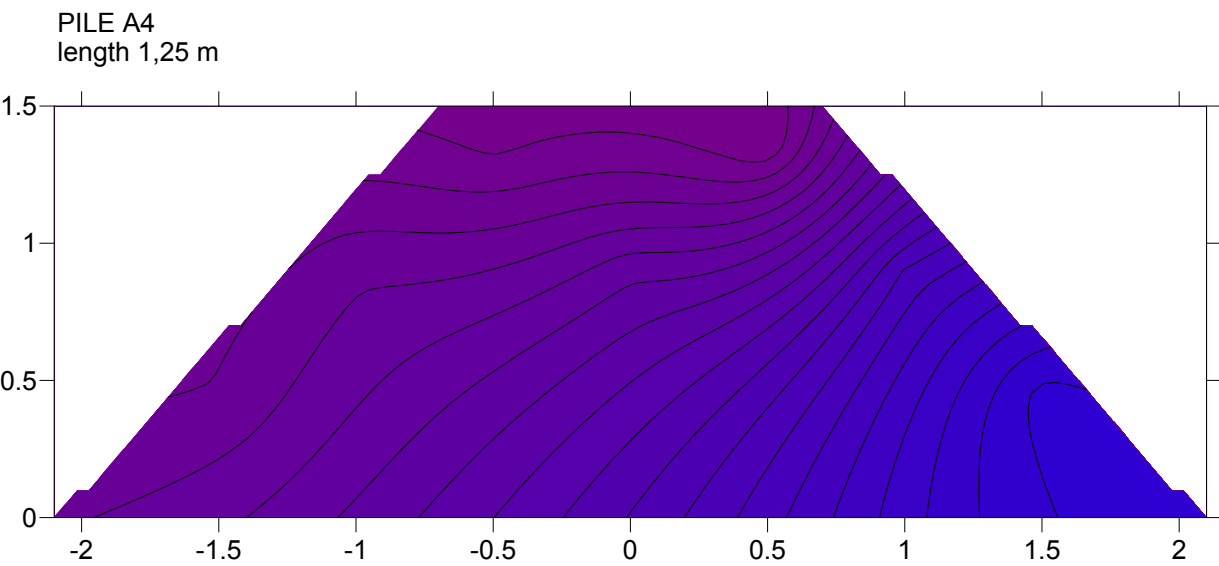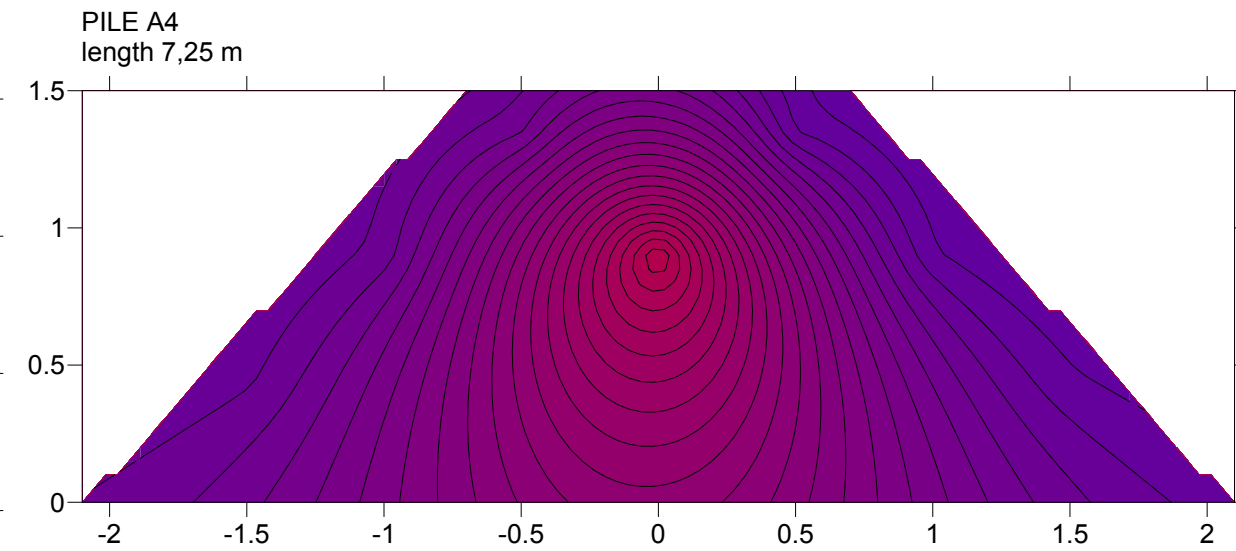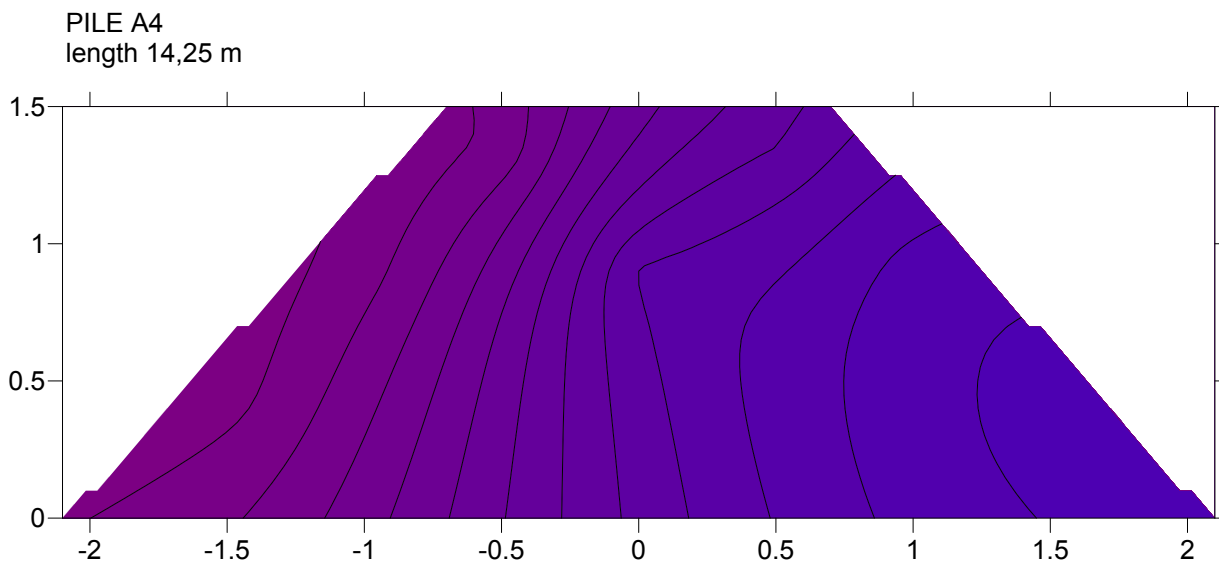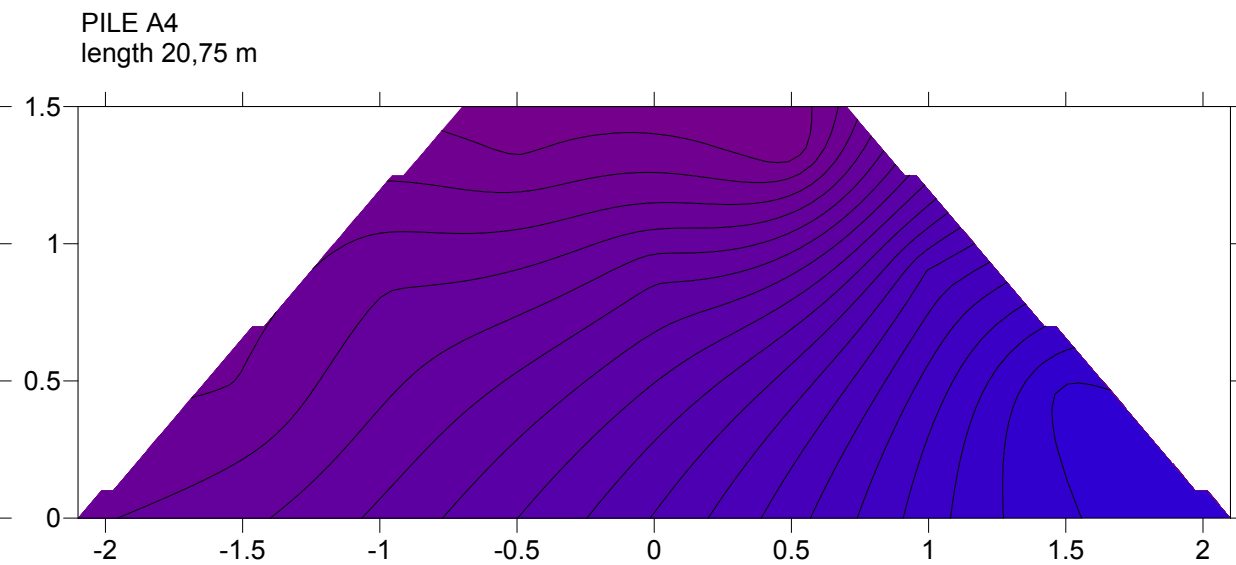

Supplement: s1 [file s1]

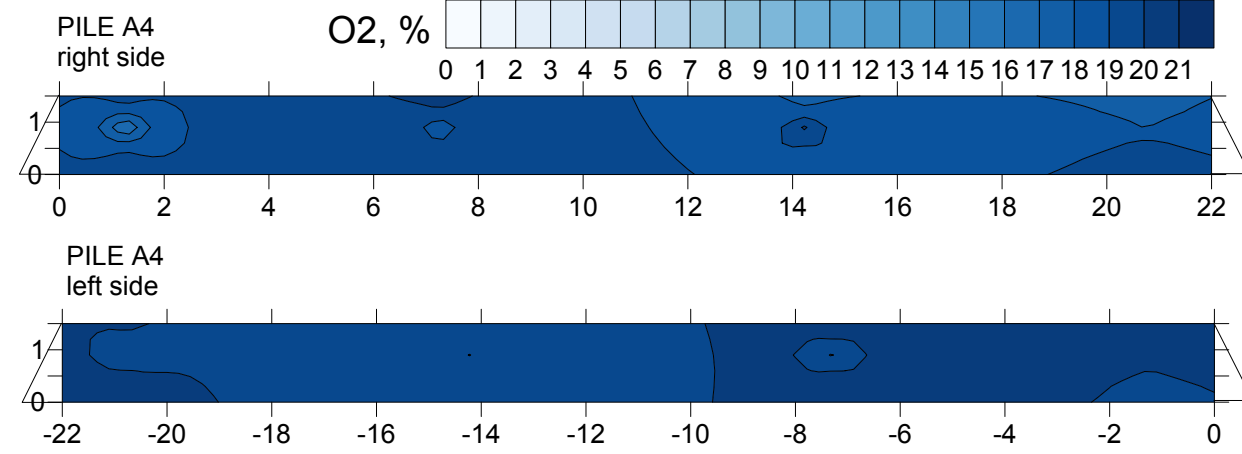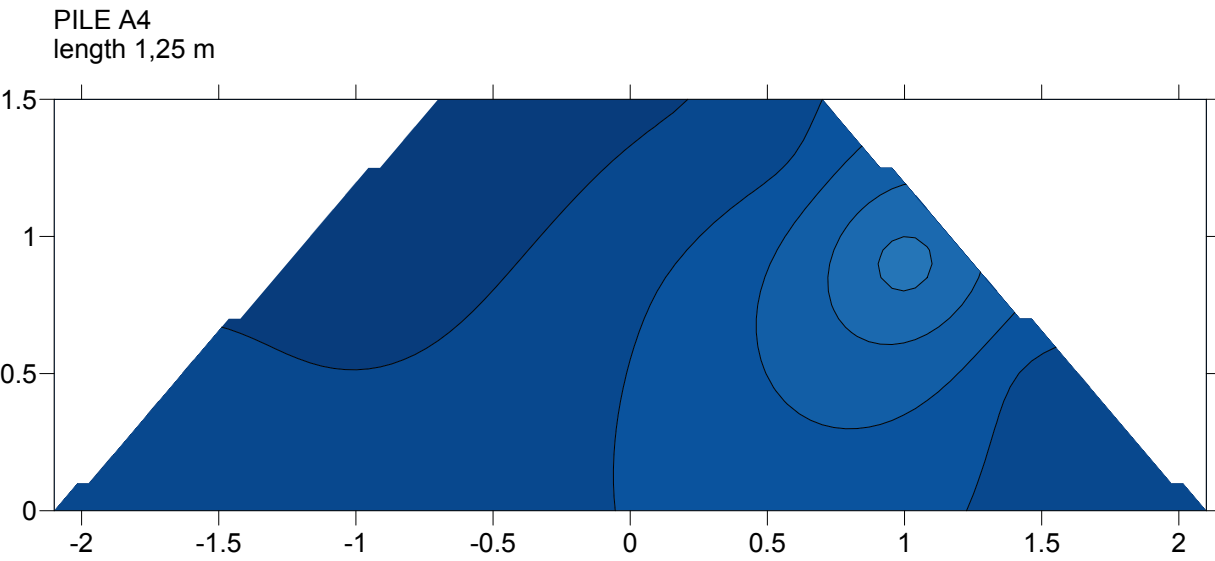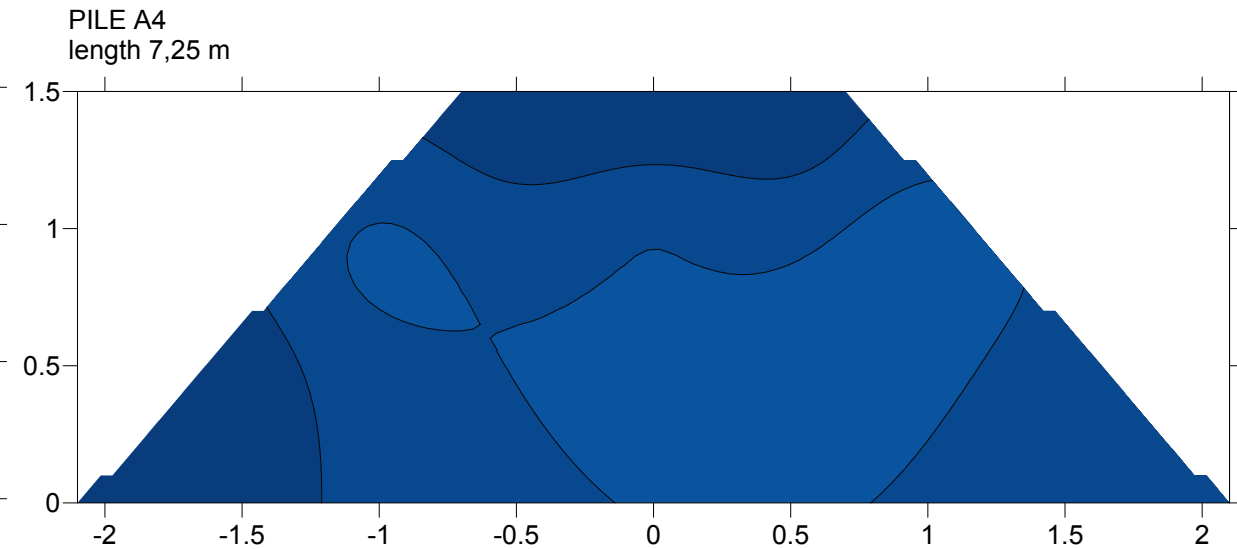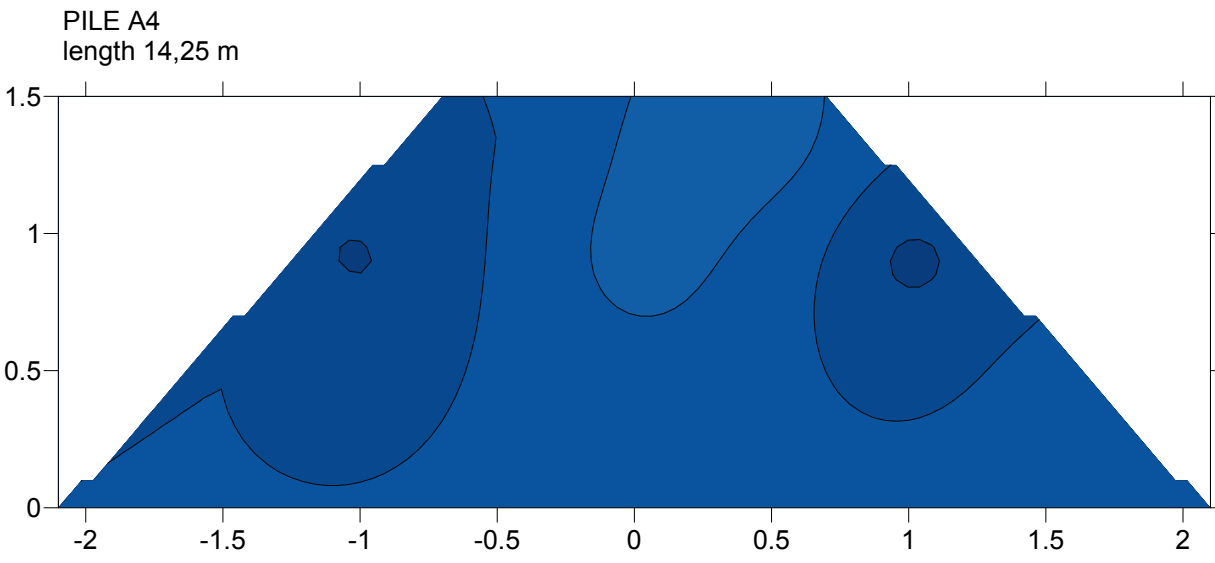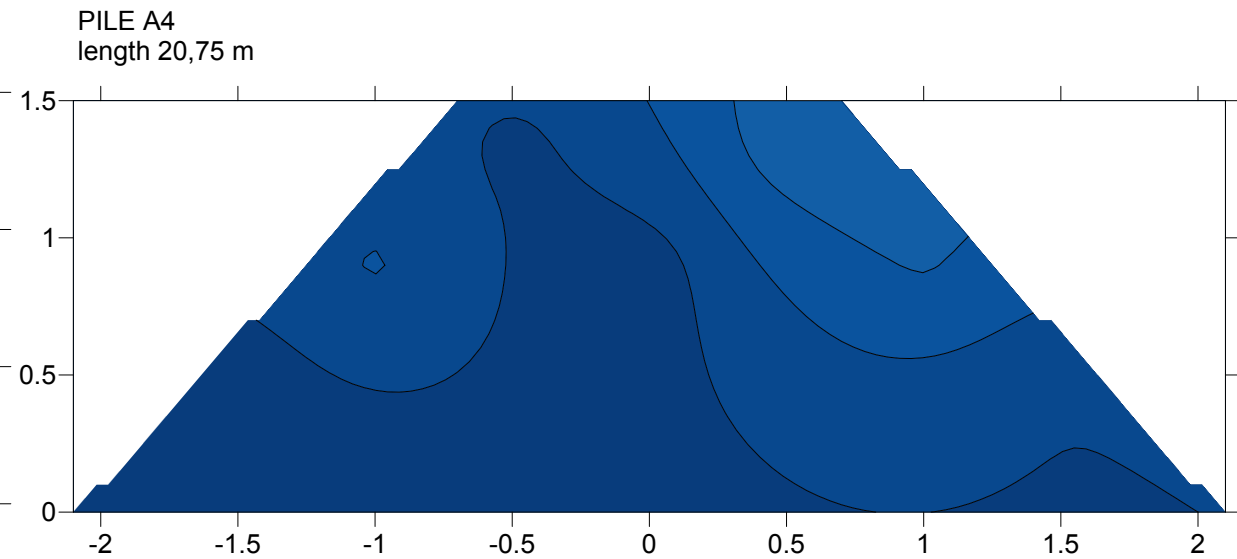

Supplement: s1 [file s1]

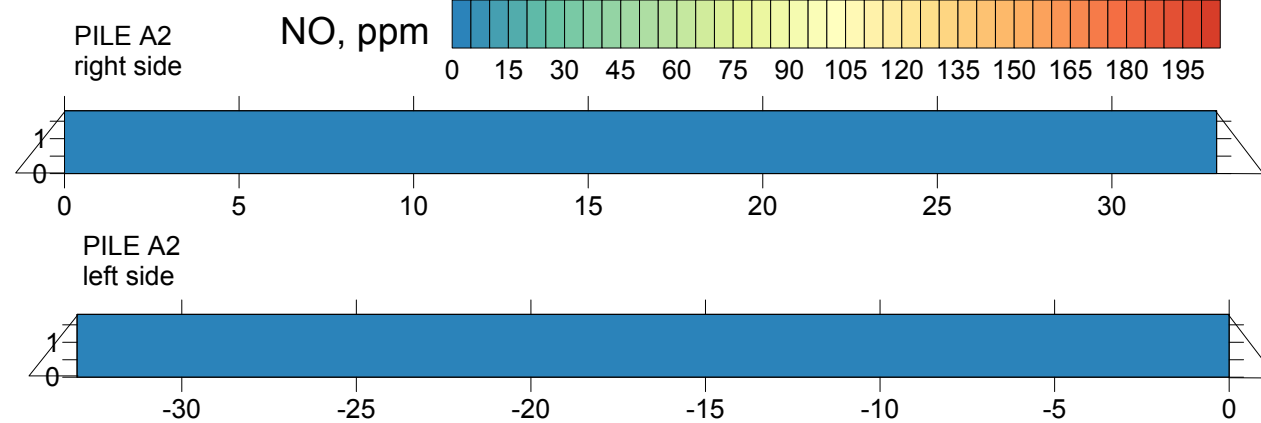

PILE A2  
length 1,5 m

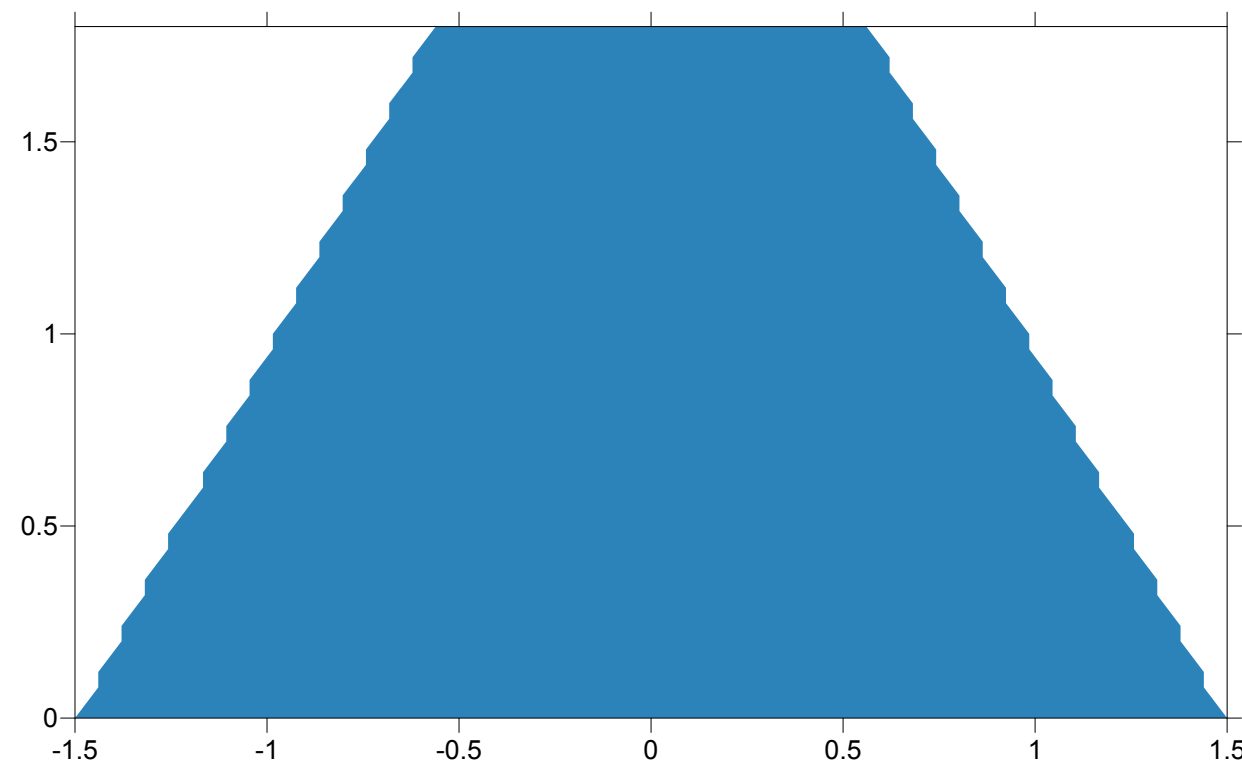

PILE A2  
length 11,5 m

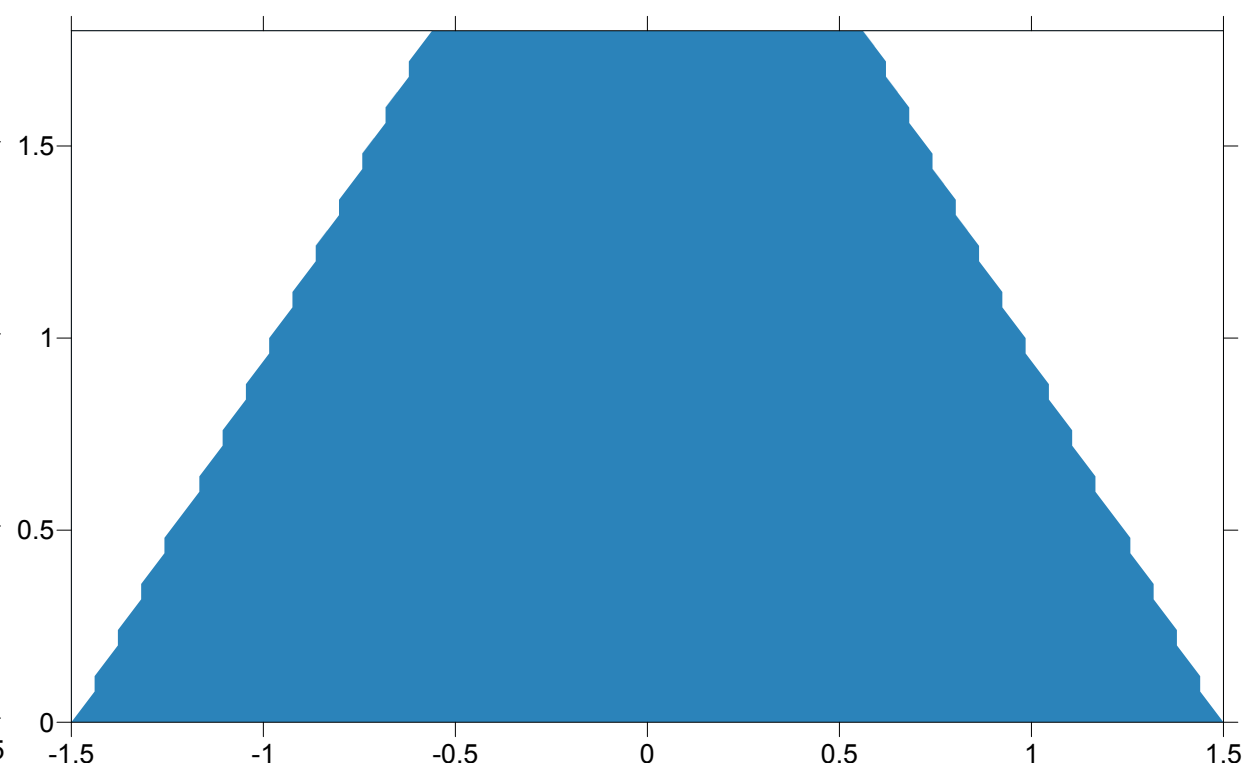

PILE A2  
length 21,5 m

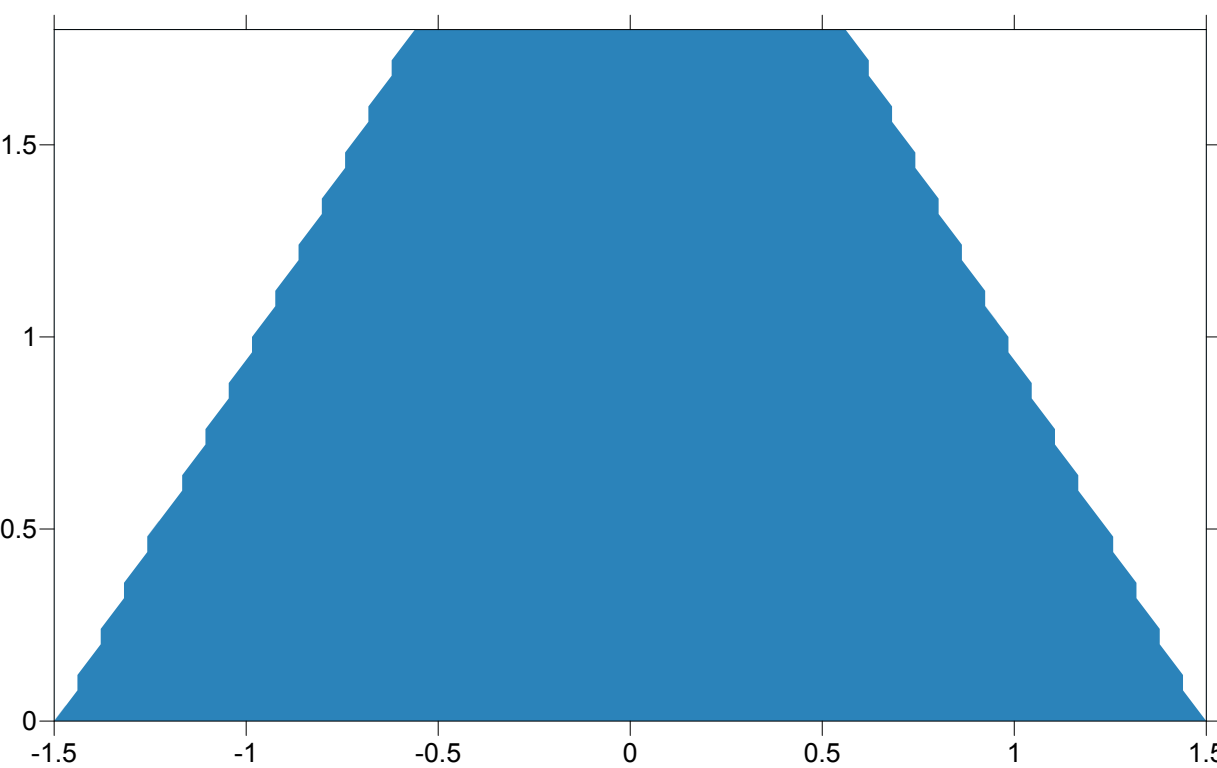

PILE A2  
length 31,5 m

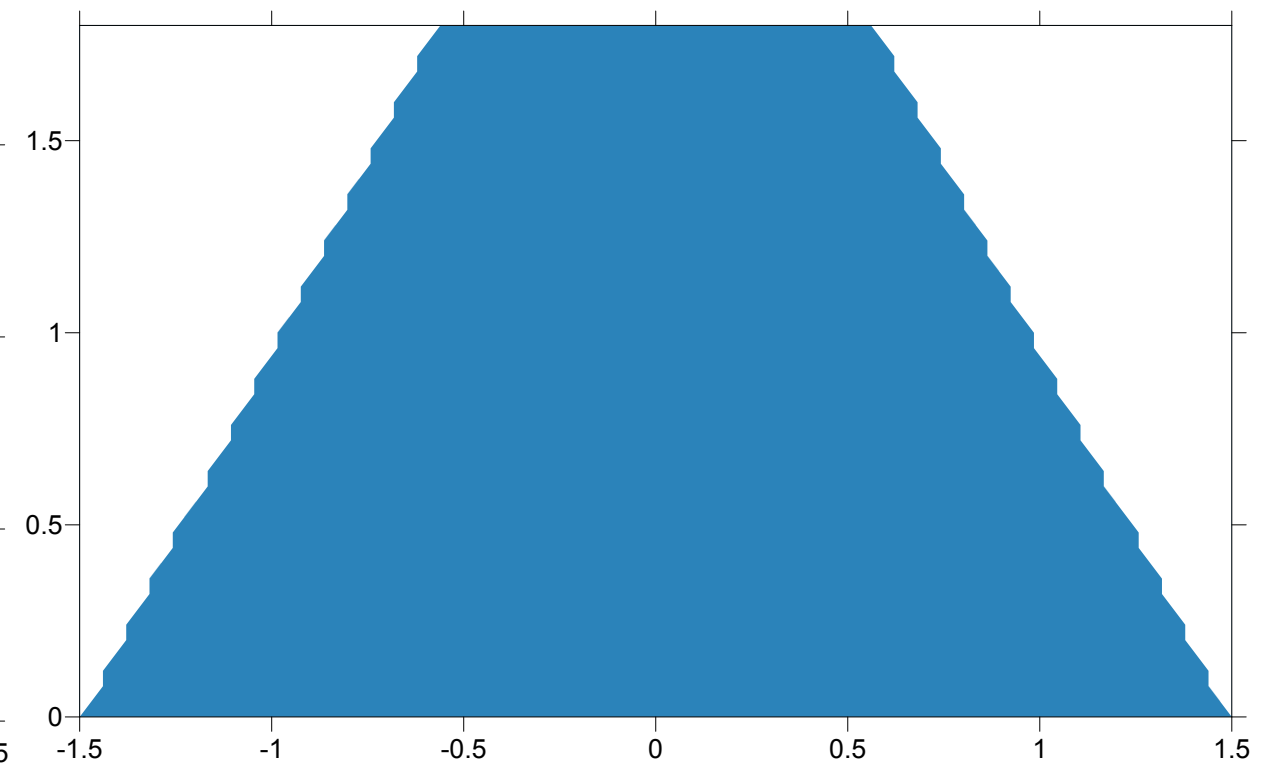

Supplement: s1 [file s1]

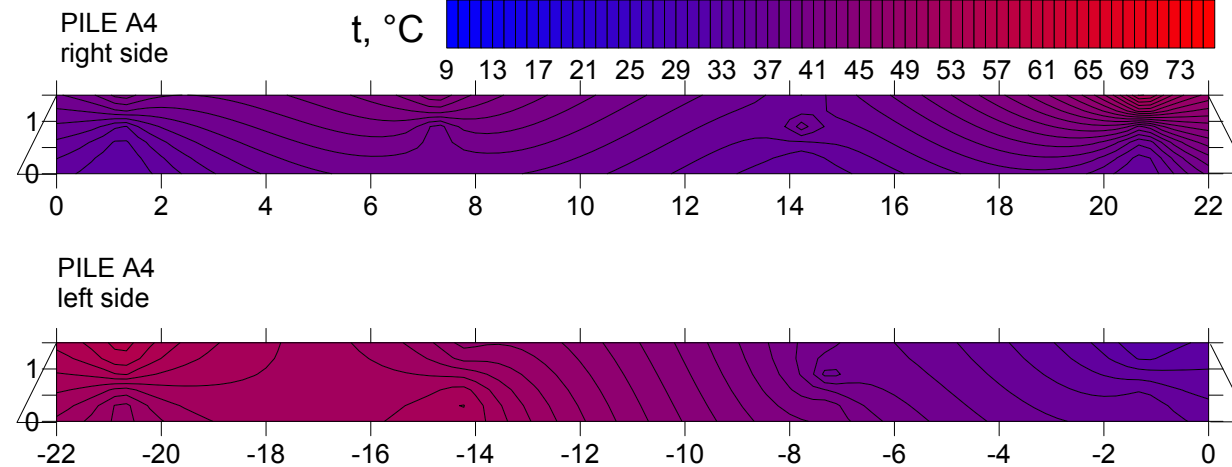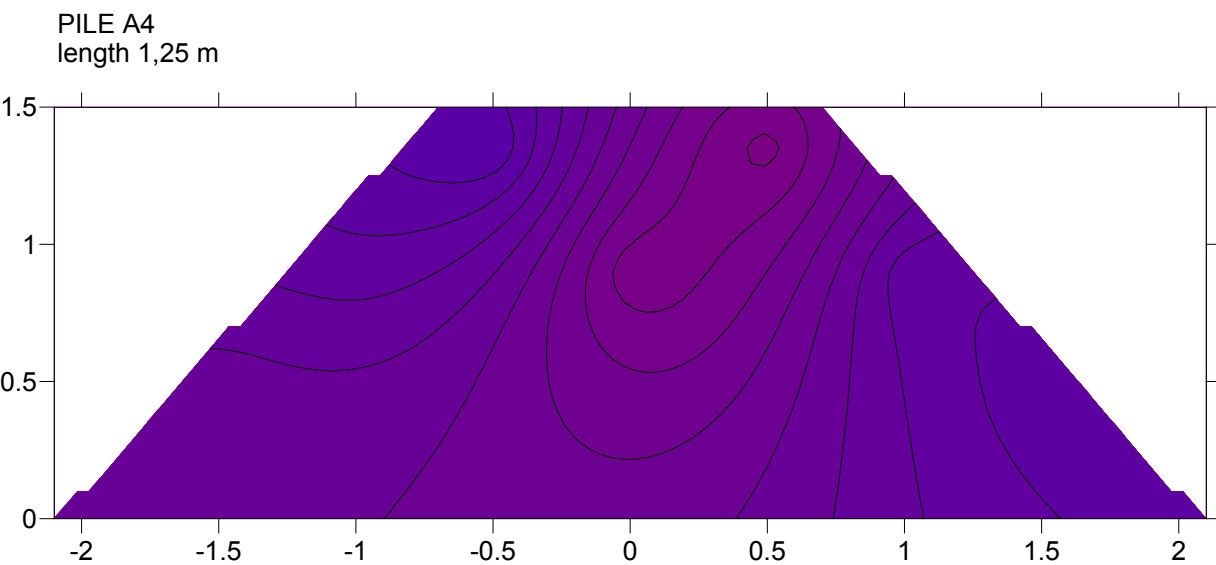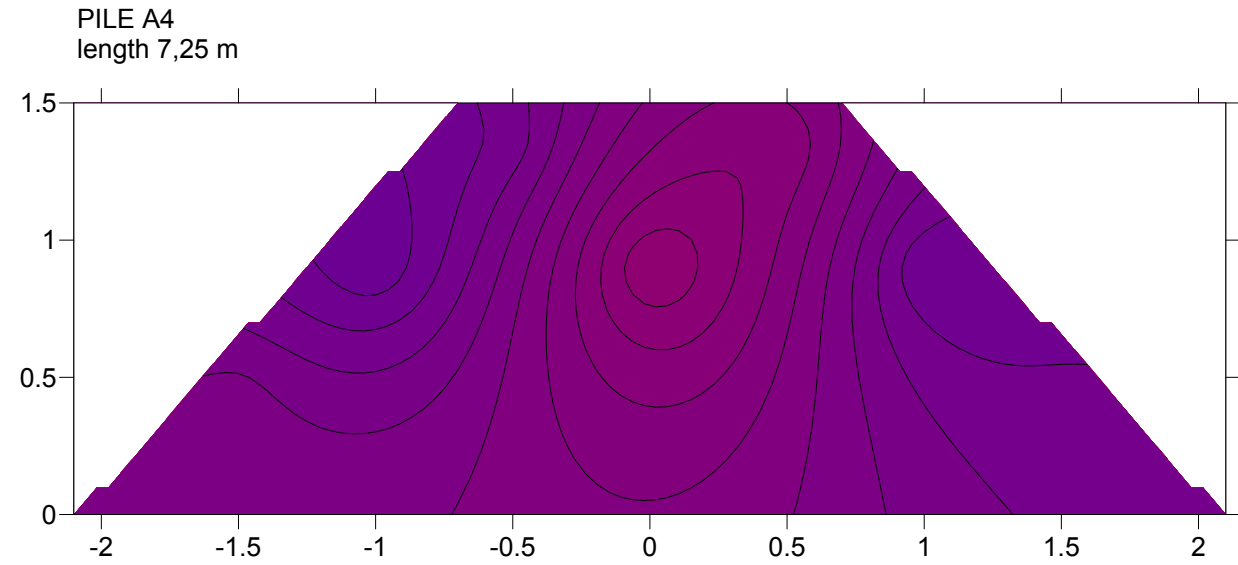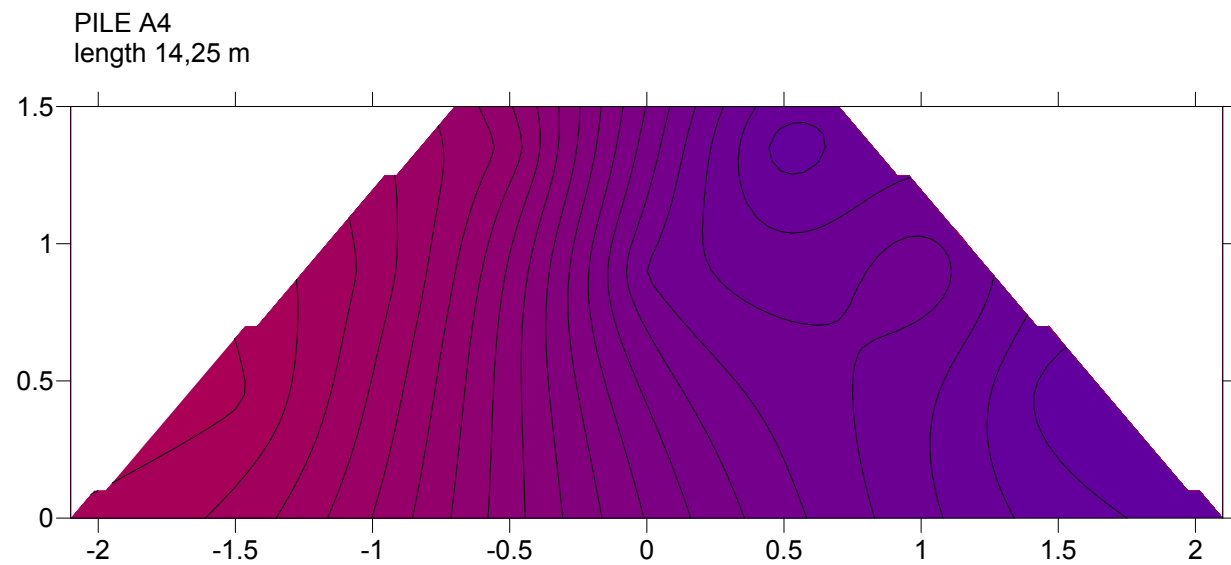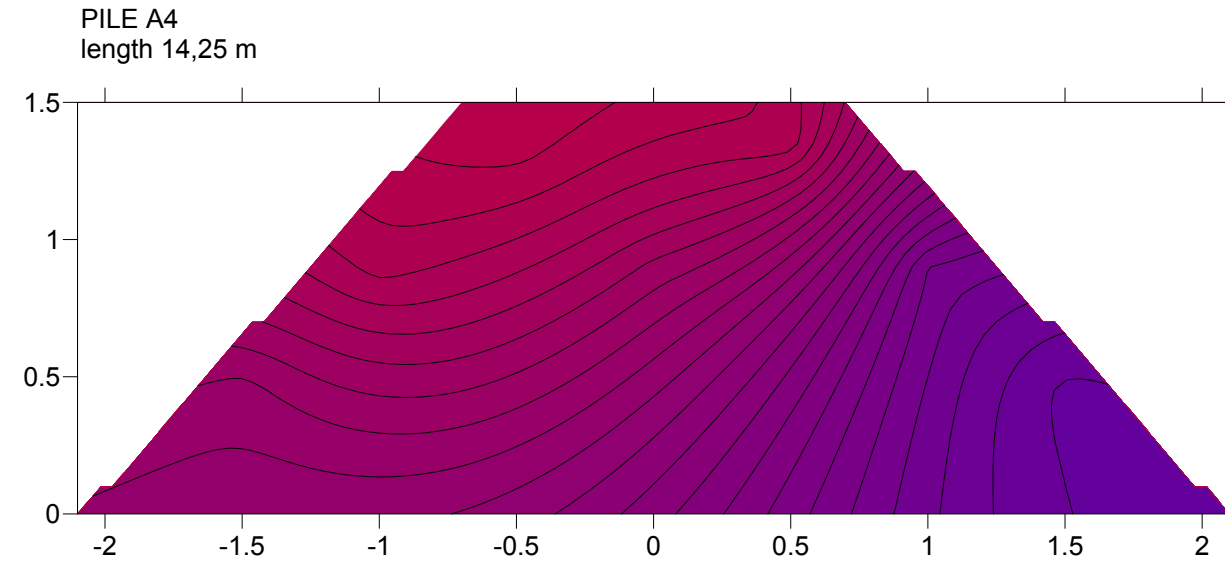

Supplement: s1 [file s1]

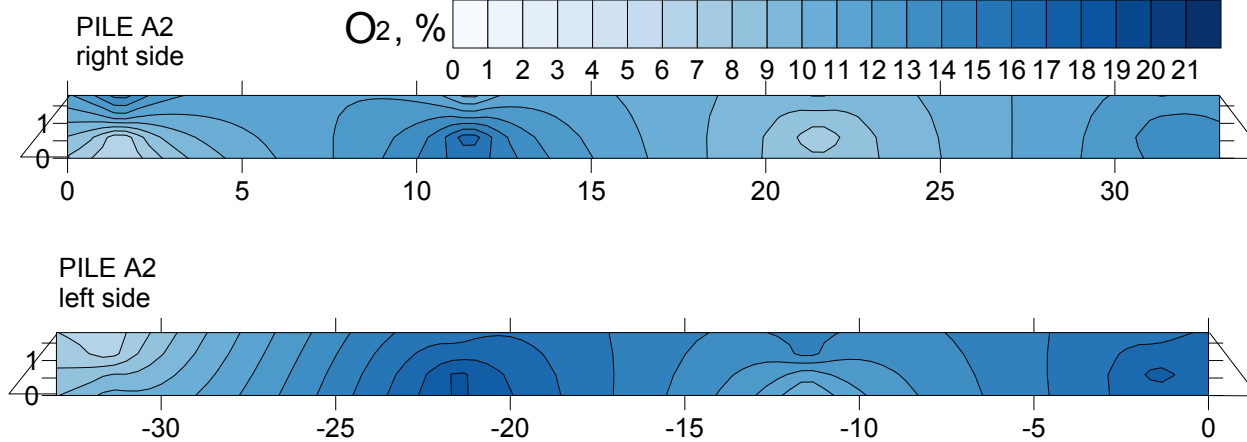

PILE A2  
length 1,5 m

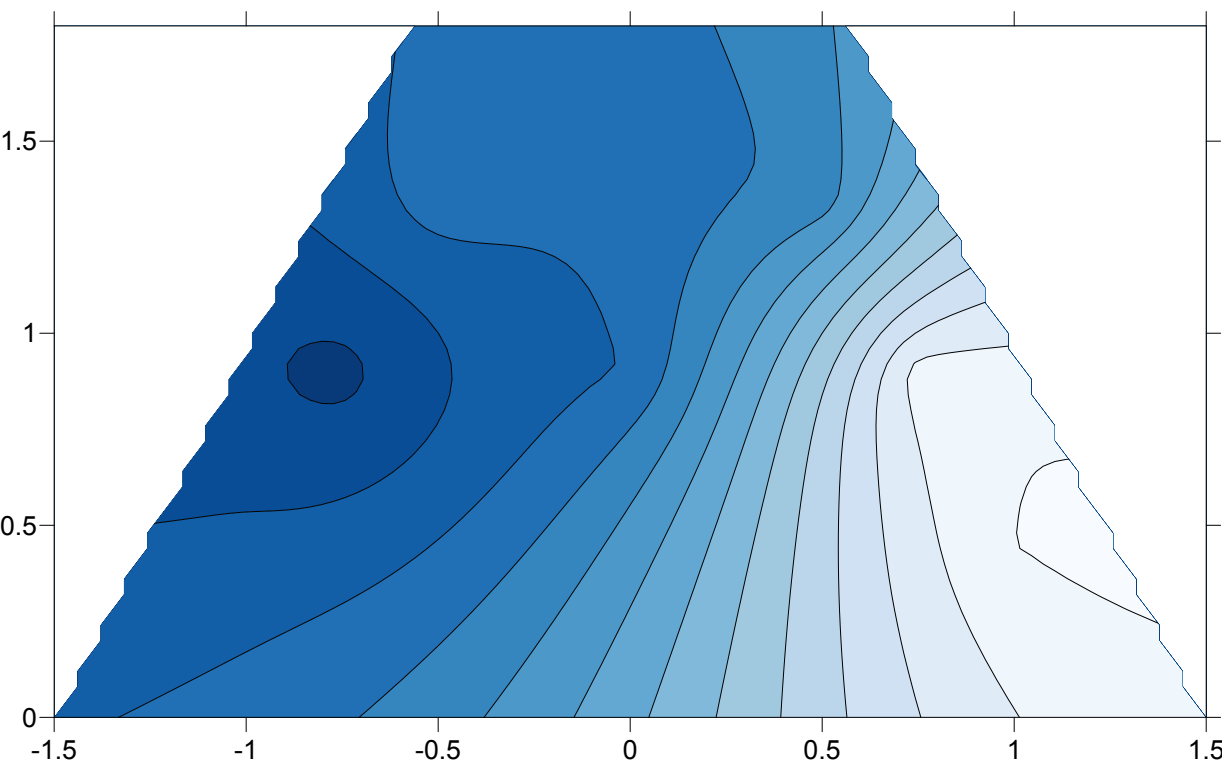

PILE A2  
length 11,5 m

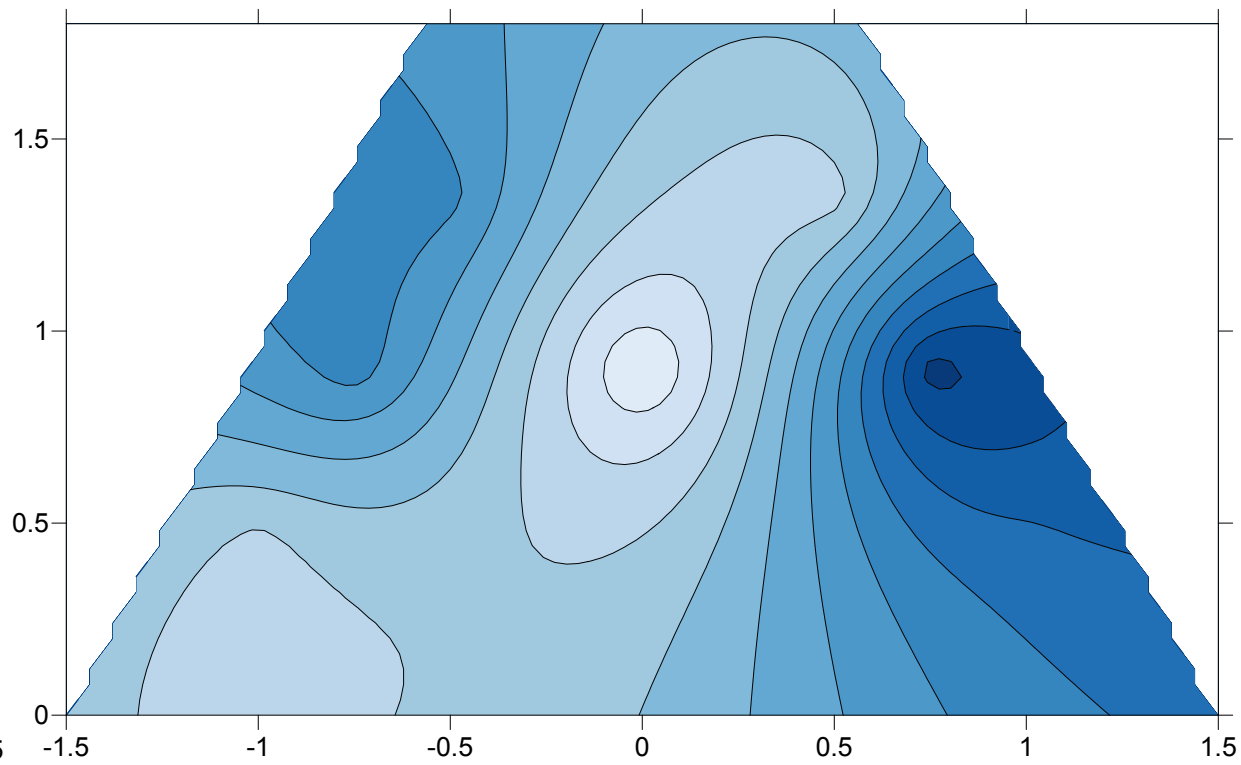

PILE A2  
length 21,5 m

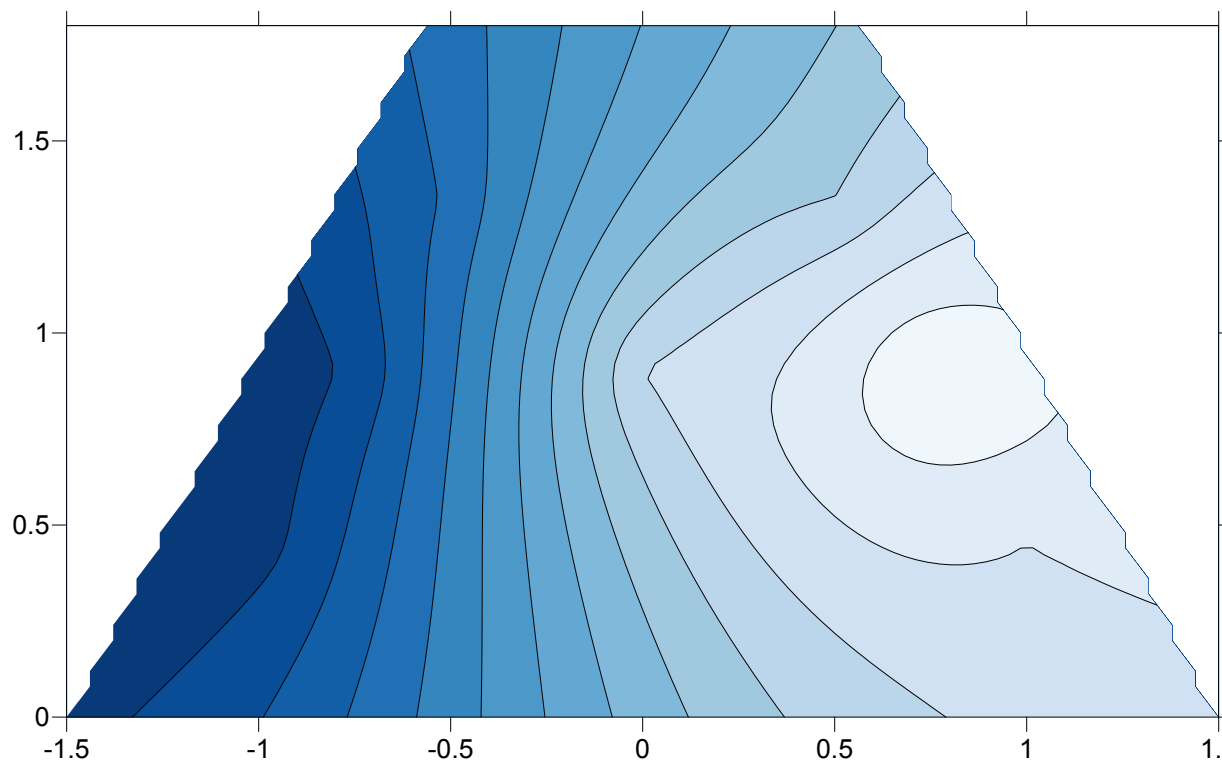

PILE A2  
length 31,5 m

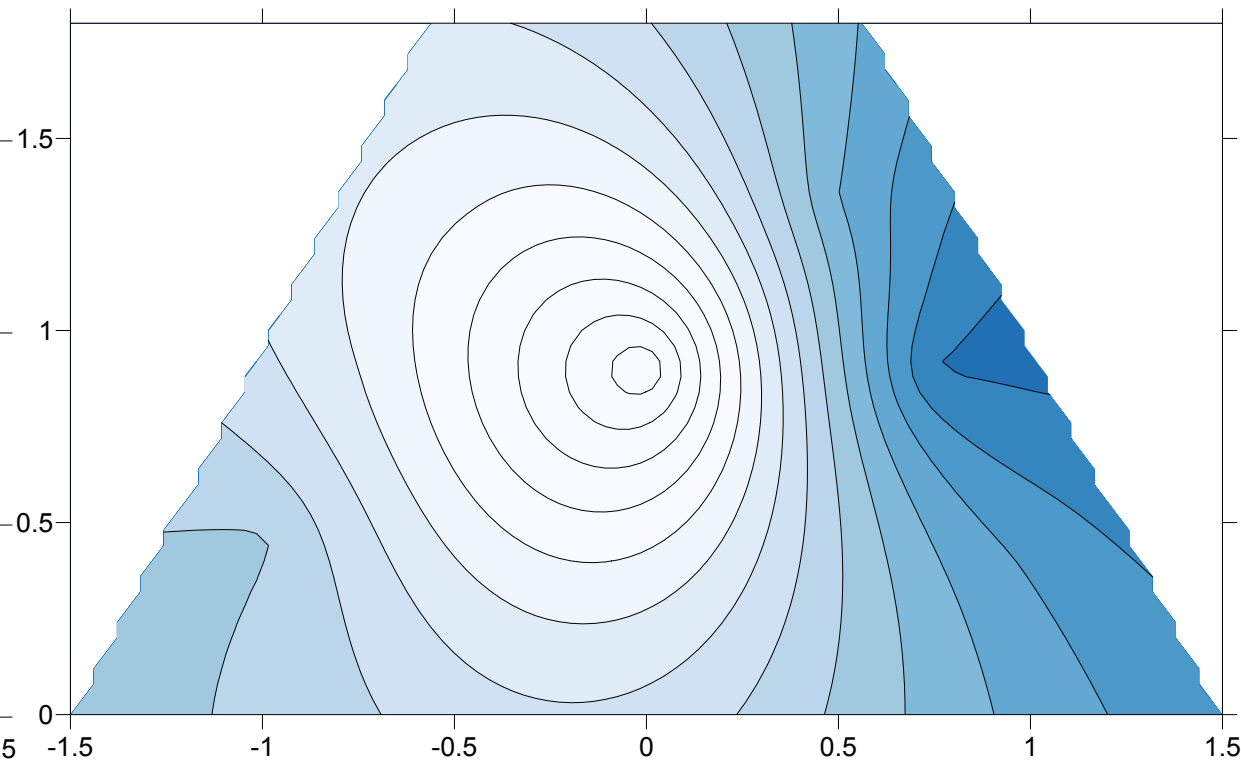

Supplement: s1 [file s1]

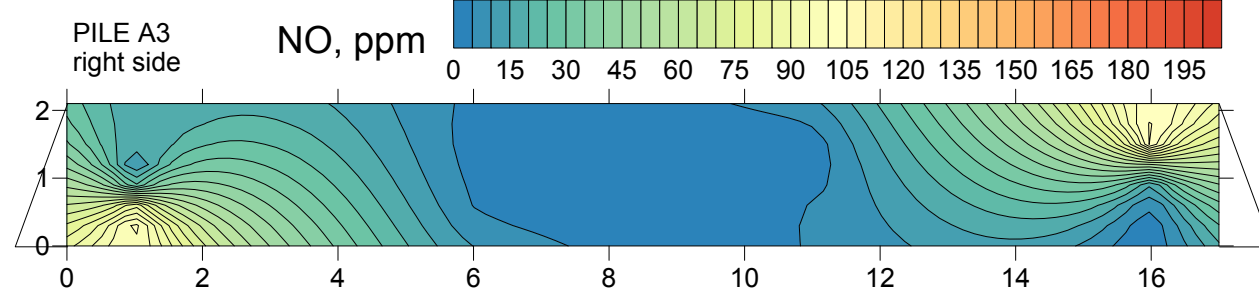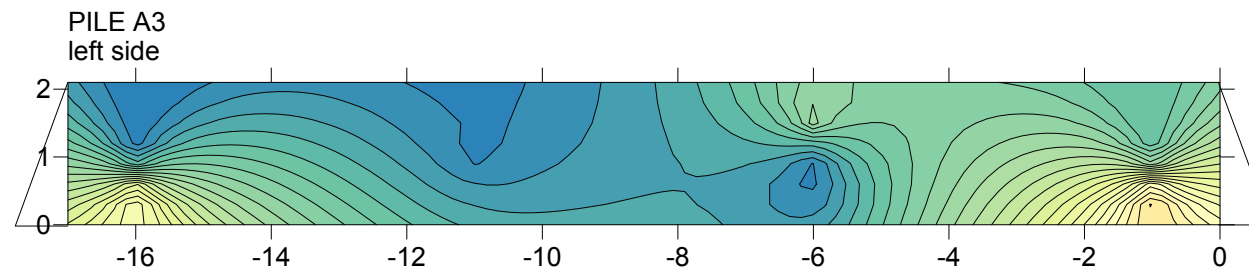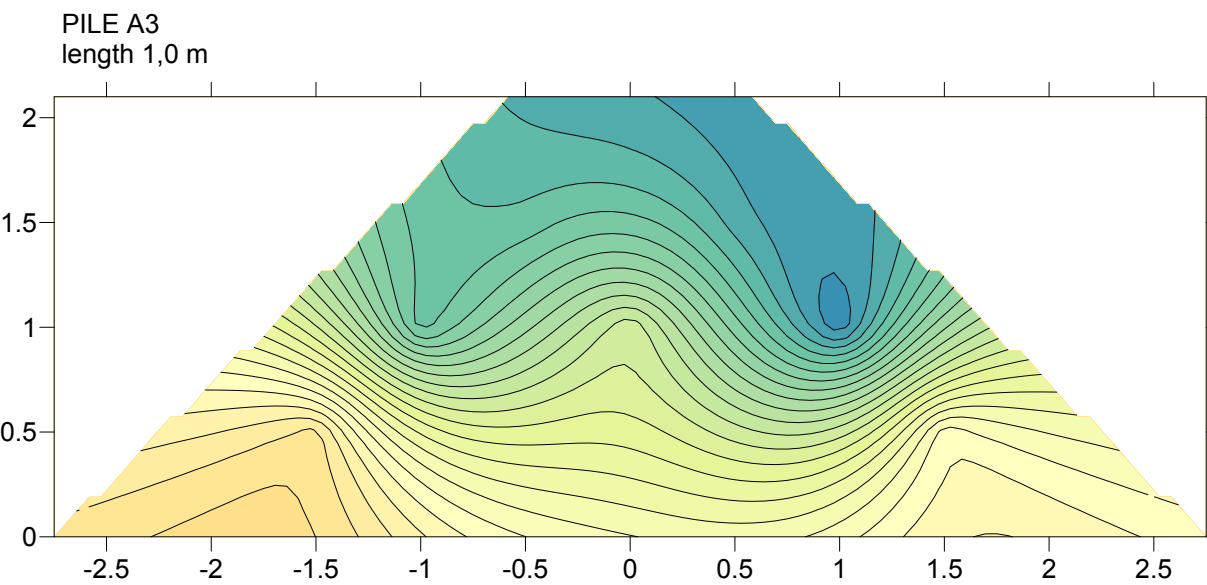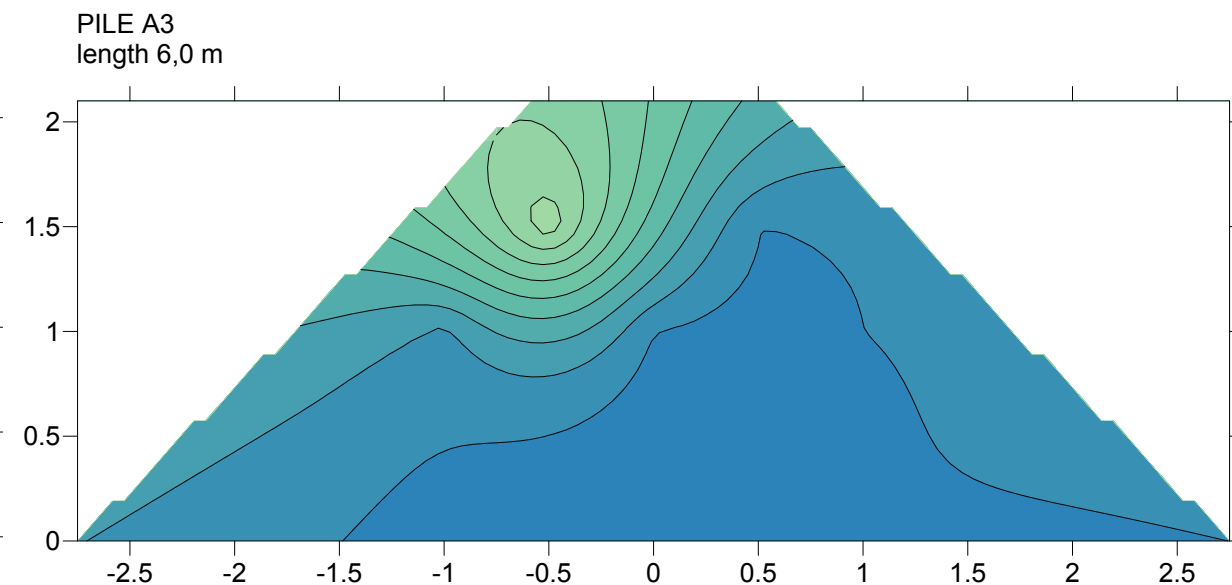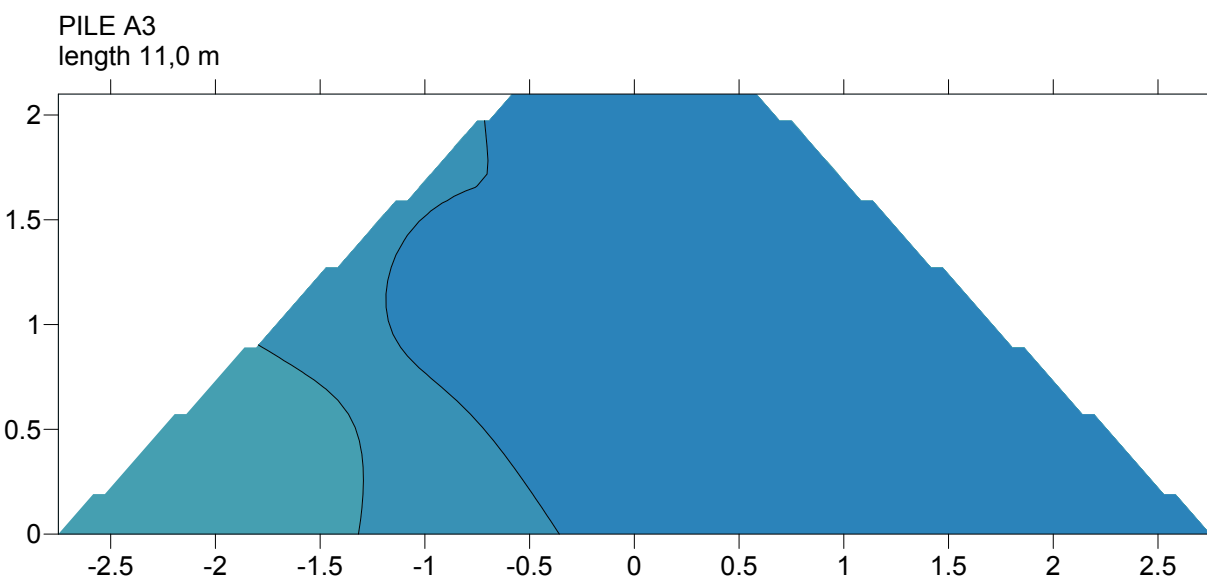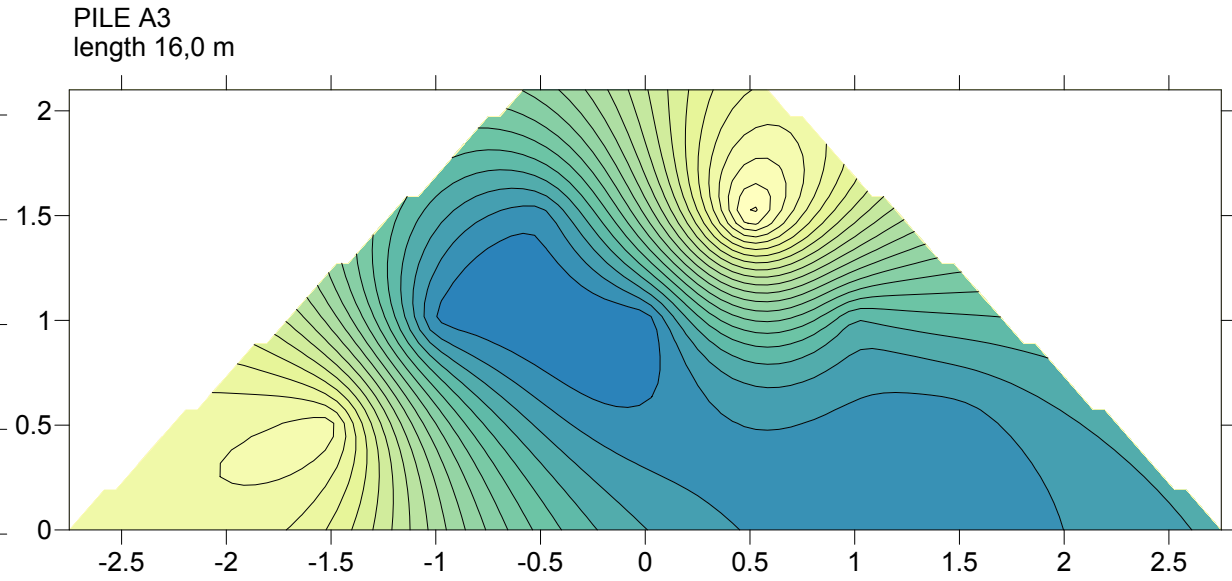

Supplement: s1 [file s1]

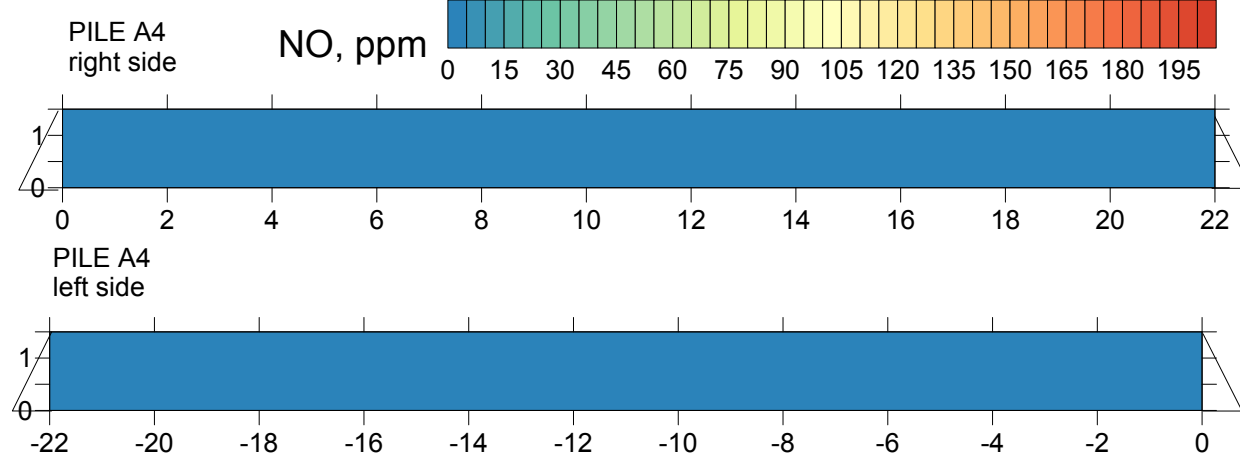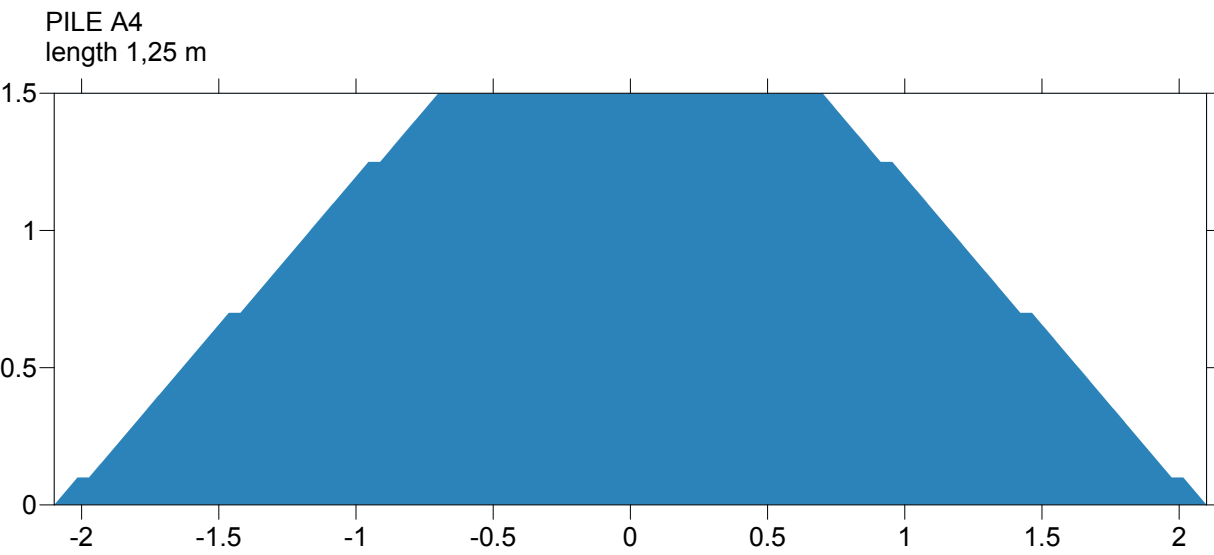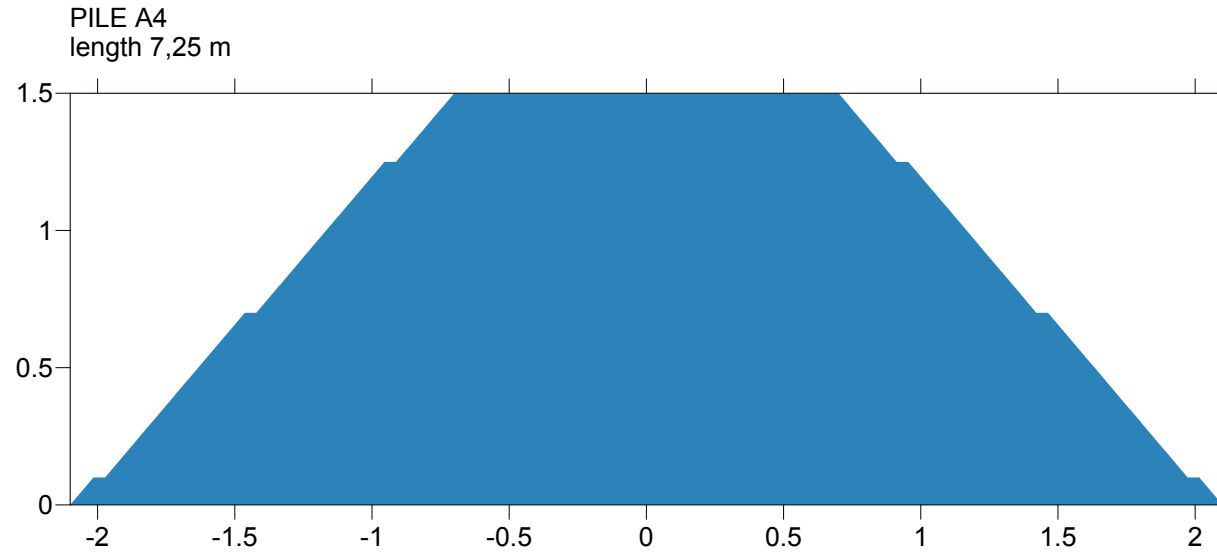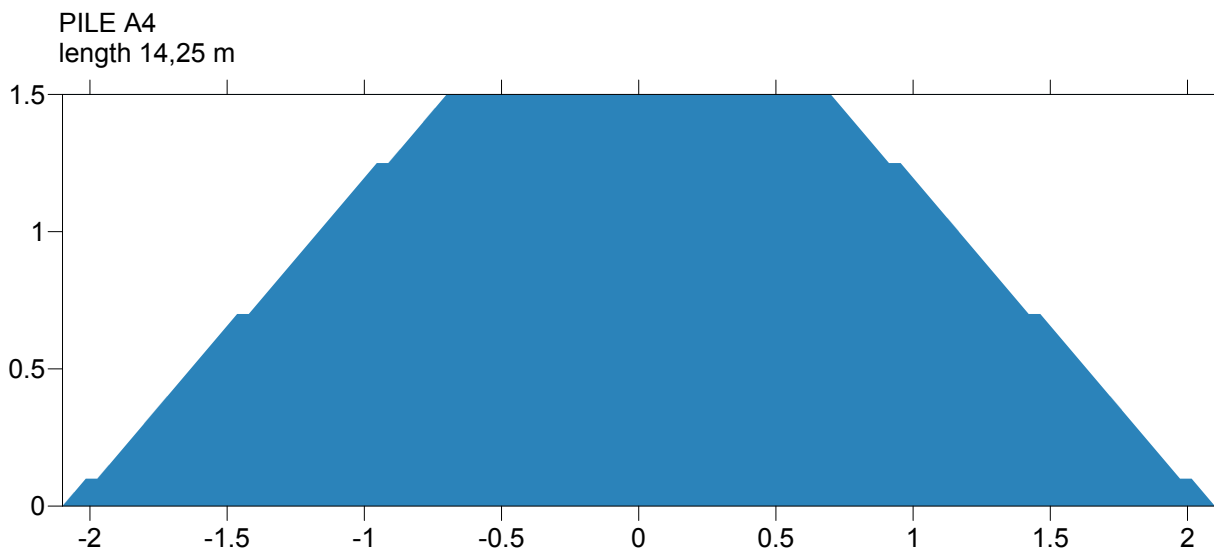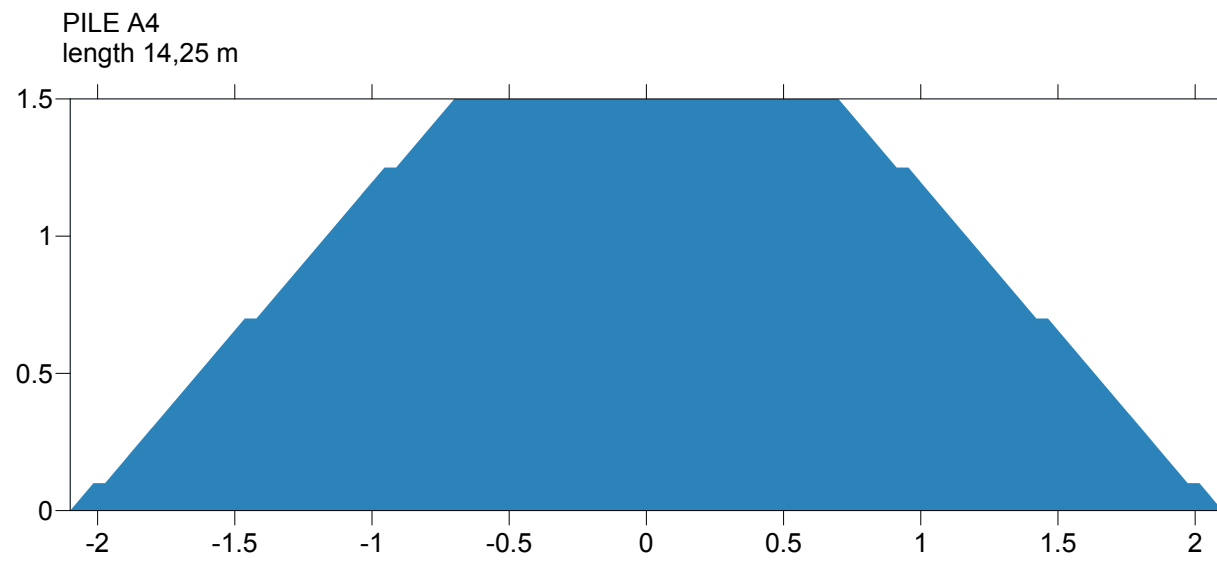

Supplement: s1 [file s1]

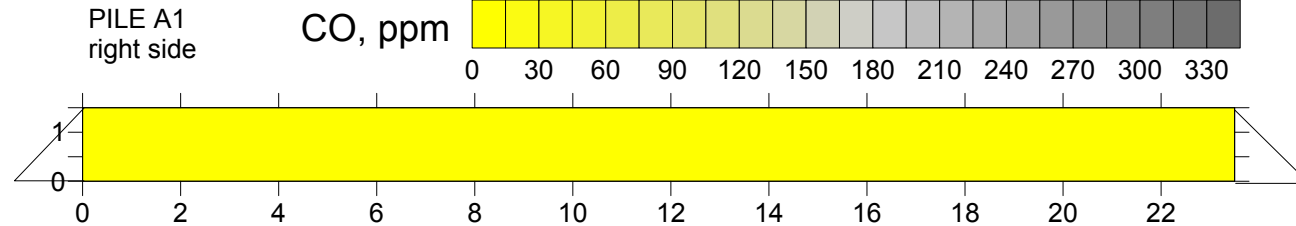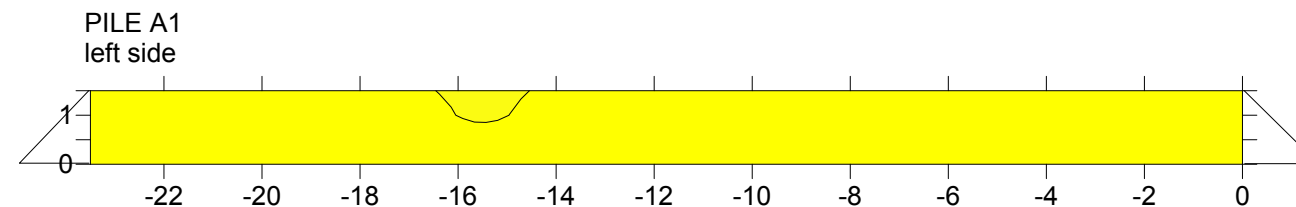

PILE A1  
length 1,5 m

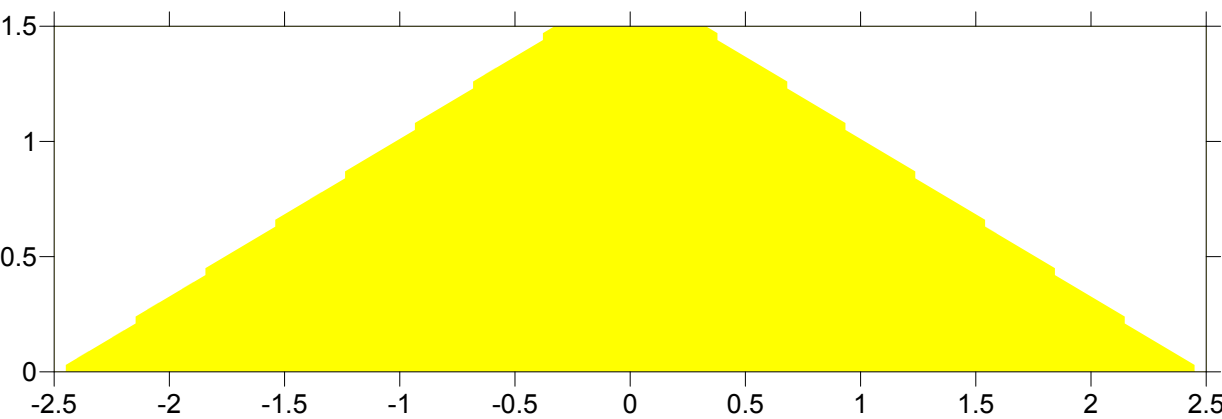

PILE A1  
length 8,5 m

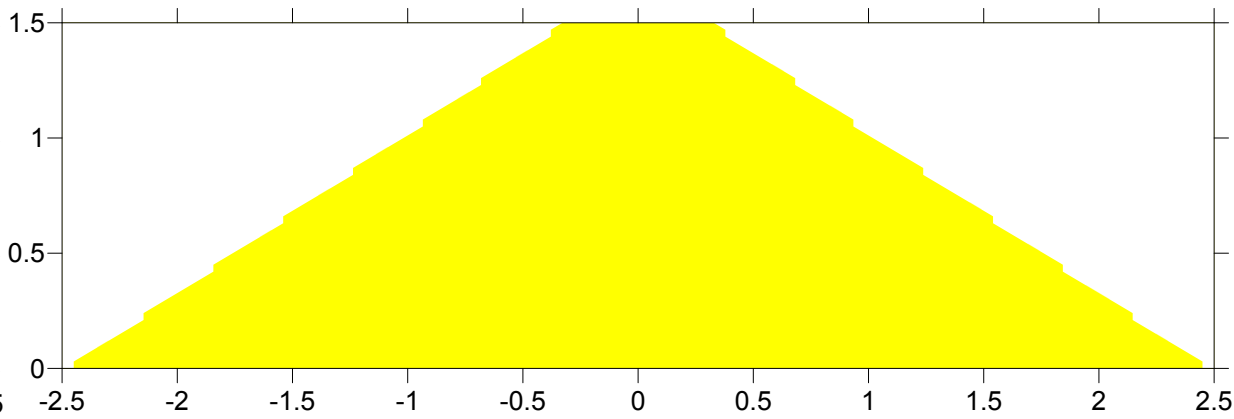

PILE A1  
length 15,5 m

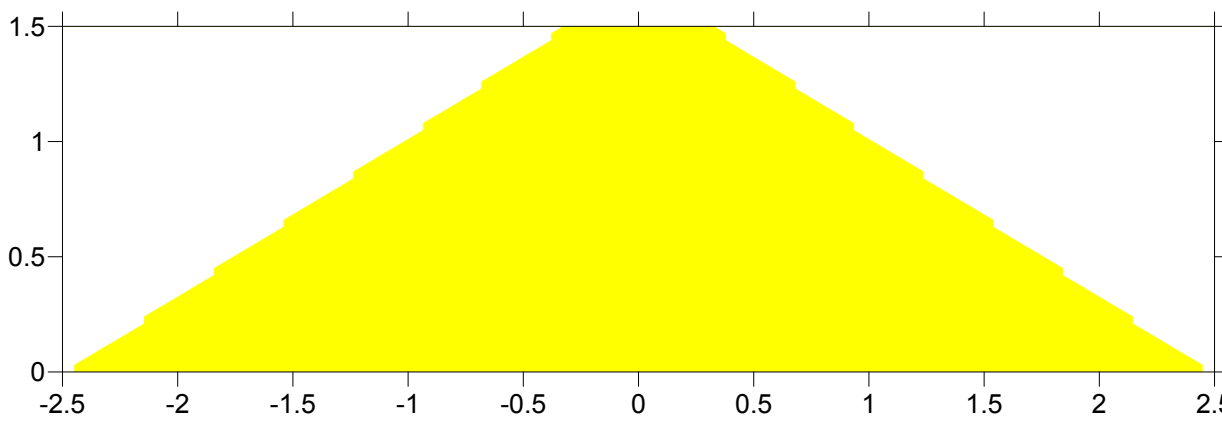

PILE A1  
length 22,5 m

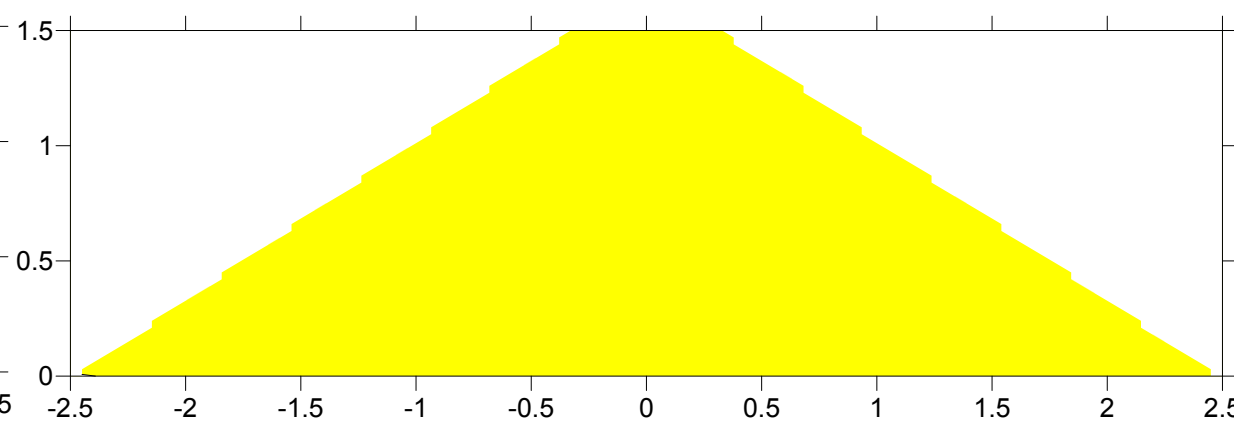

Supplement: s1 [file s1]

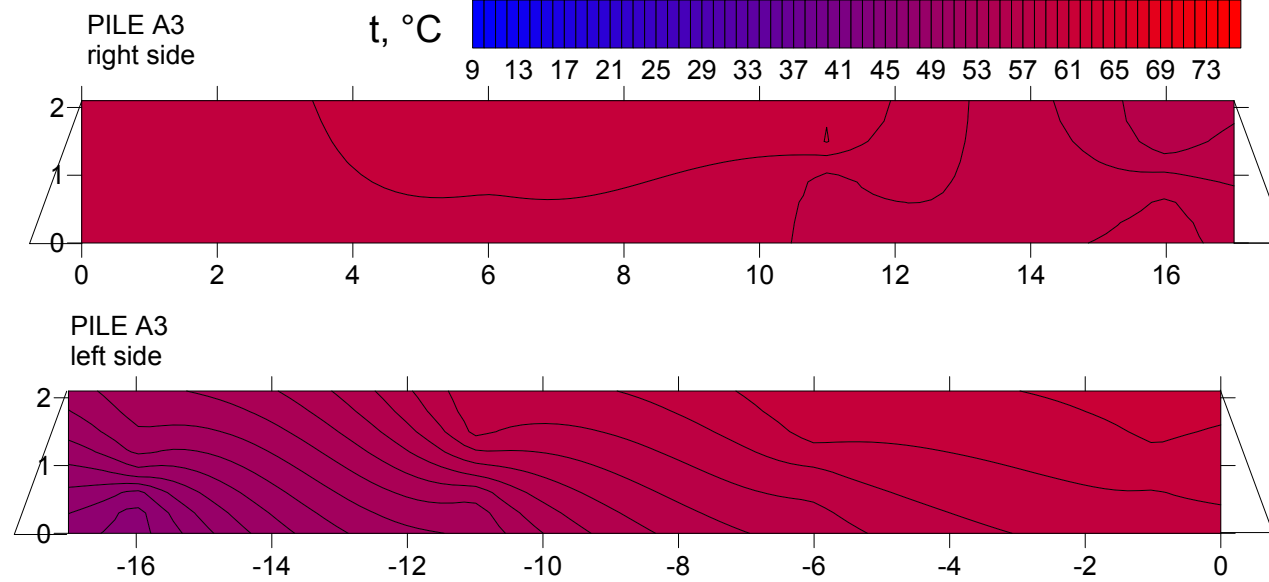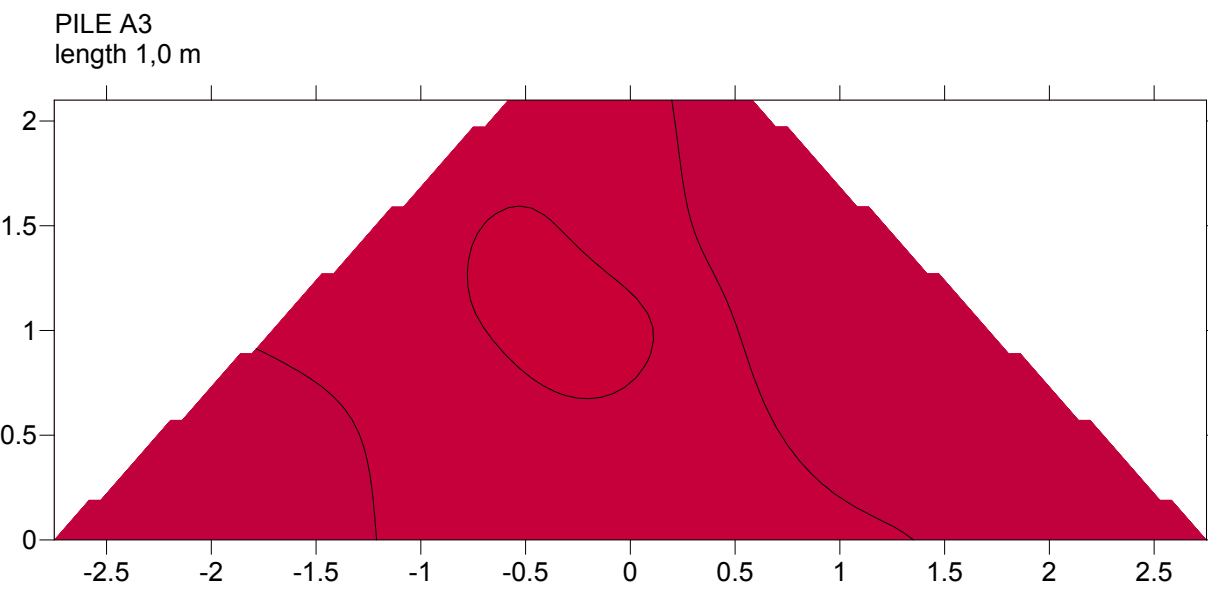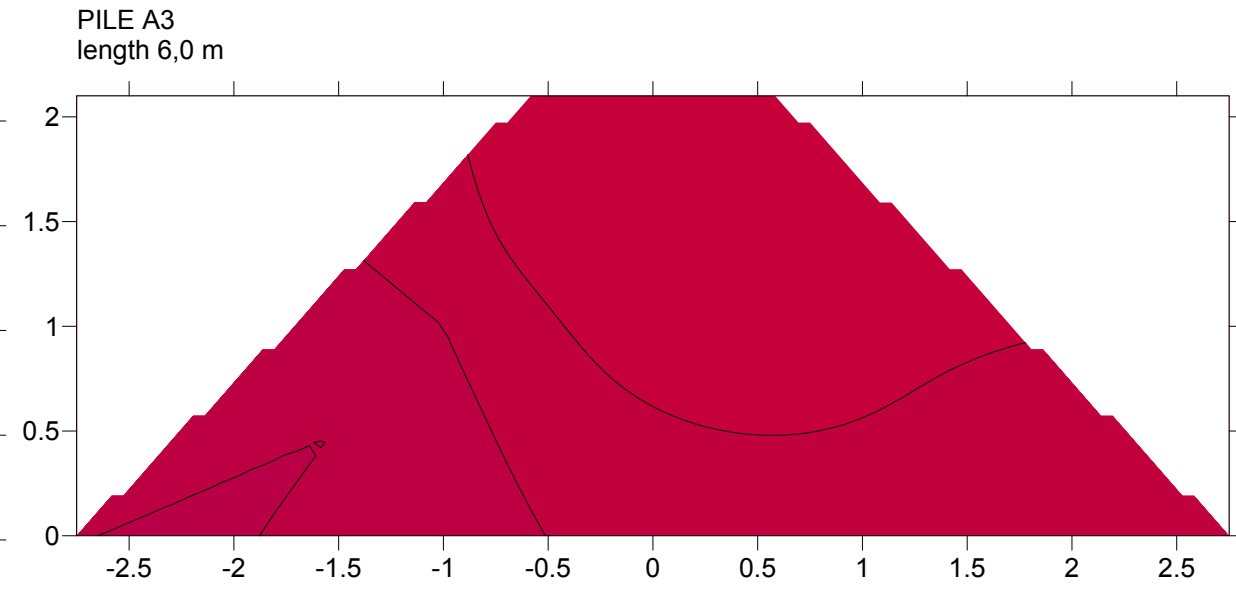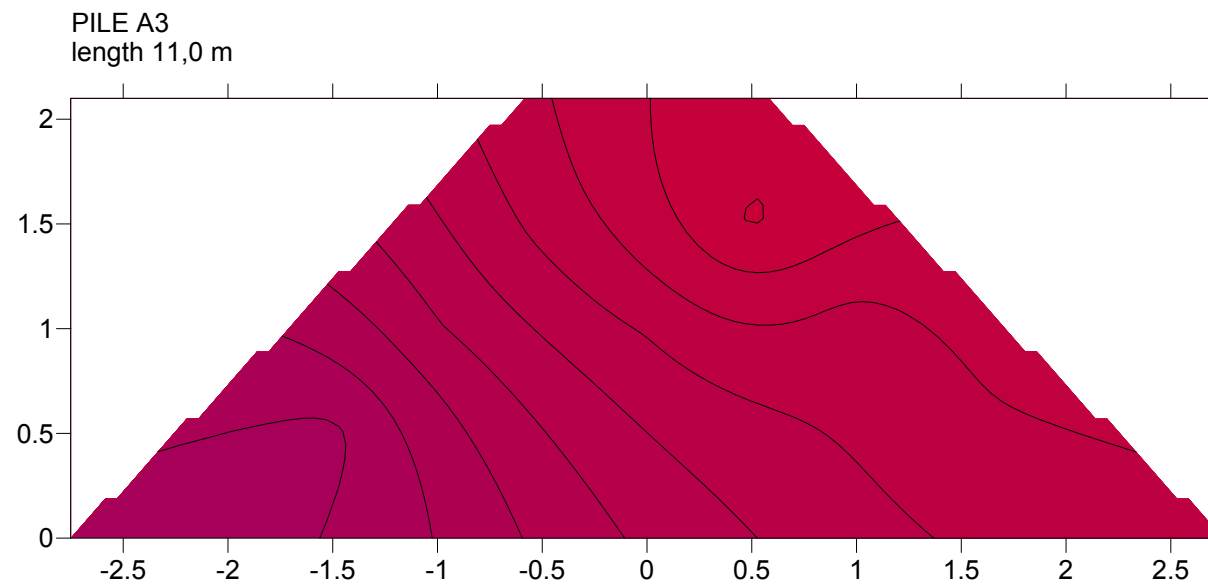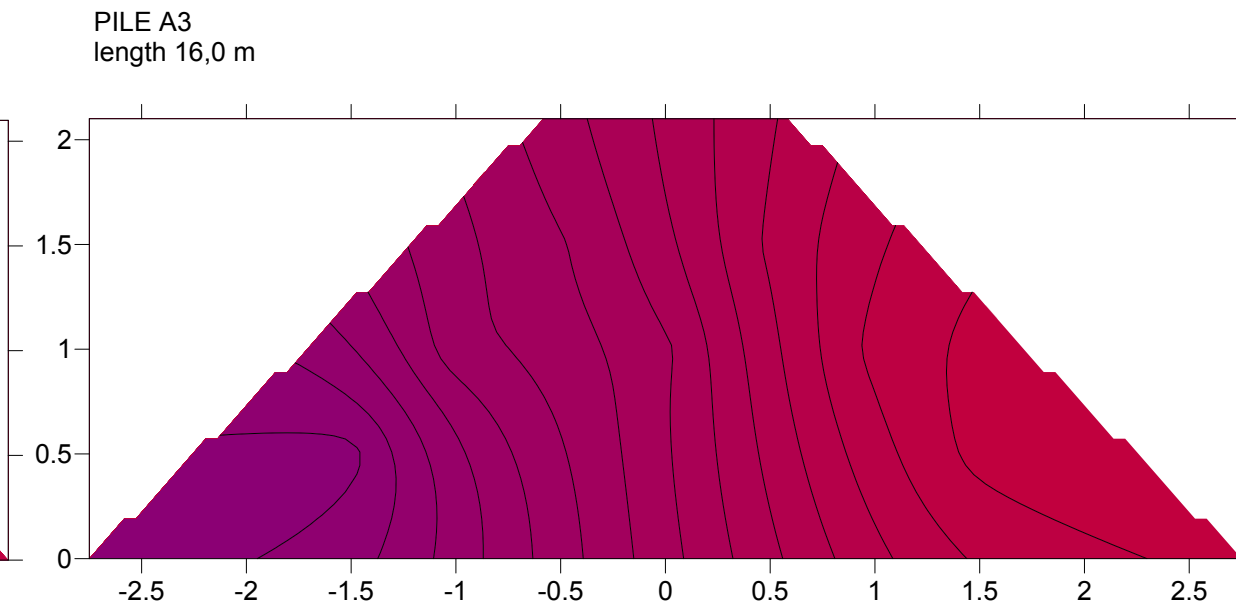

Supplement: s1 [file s1]

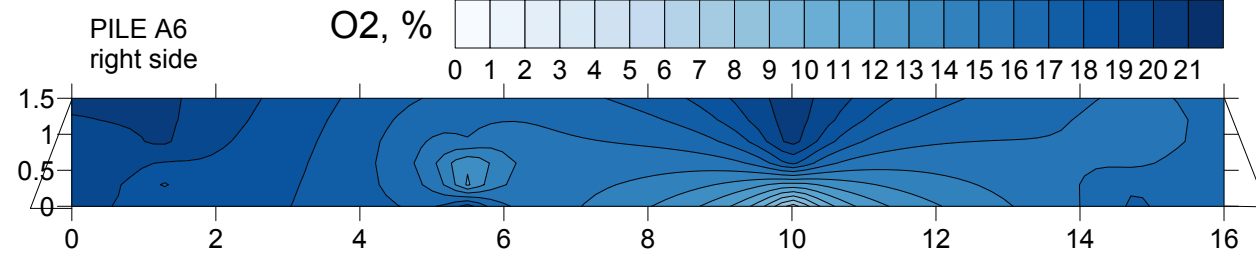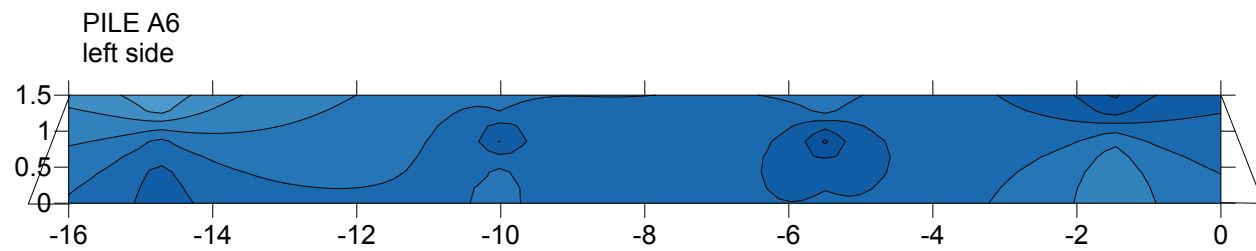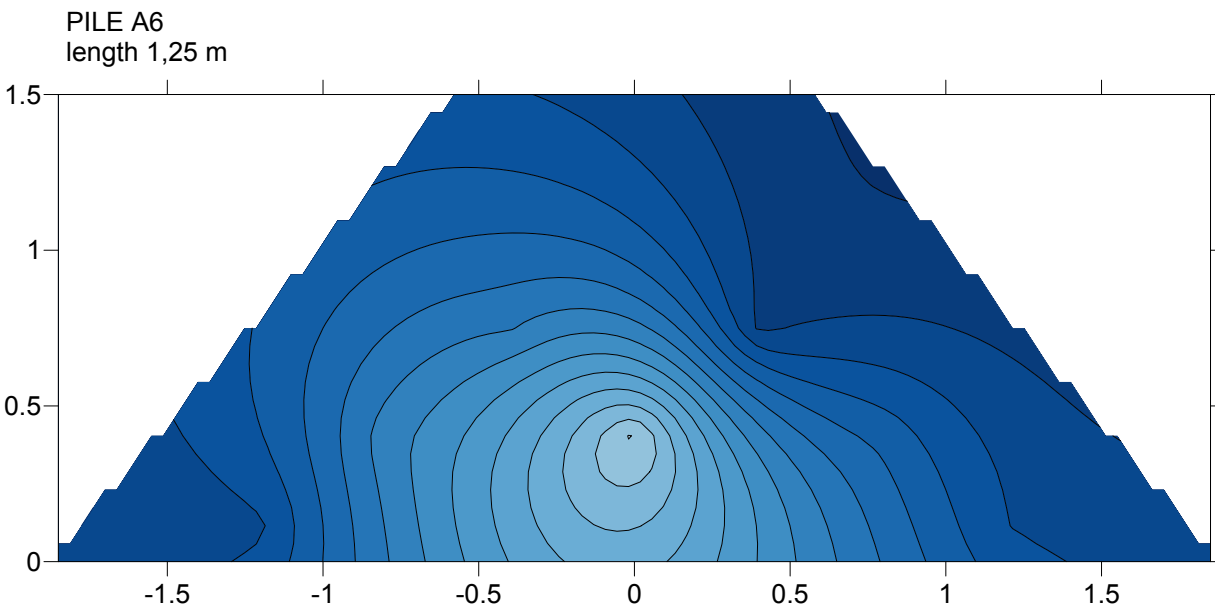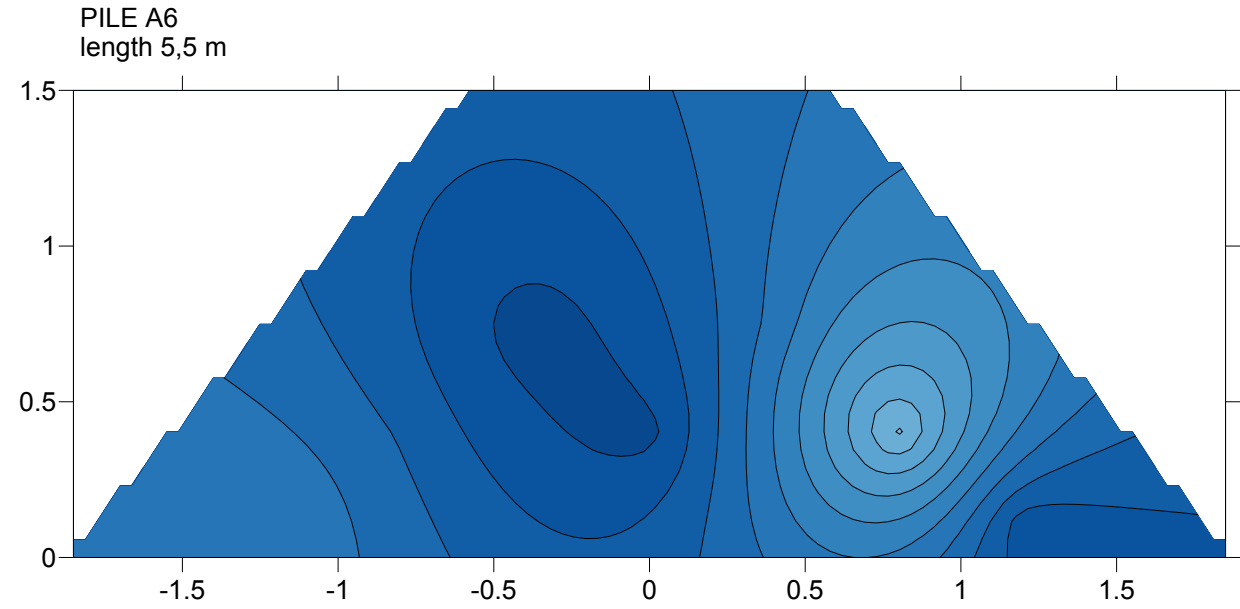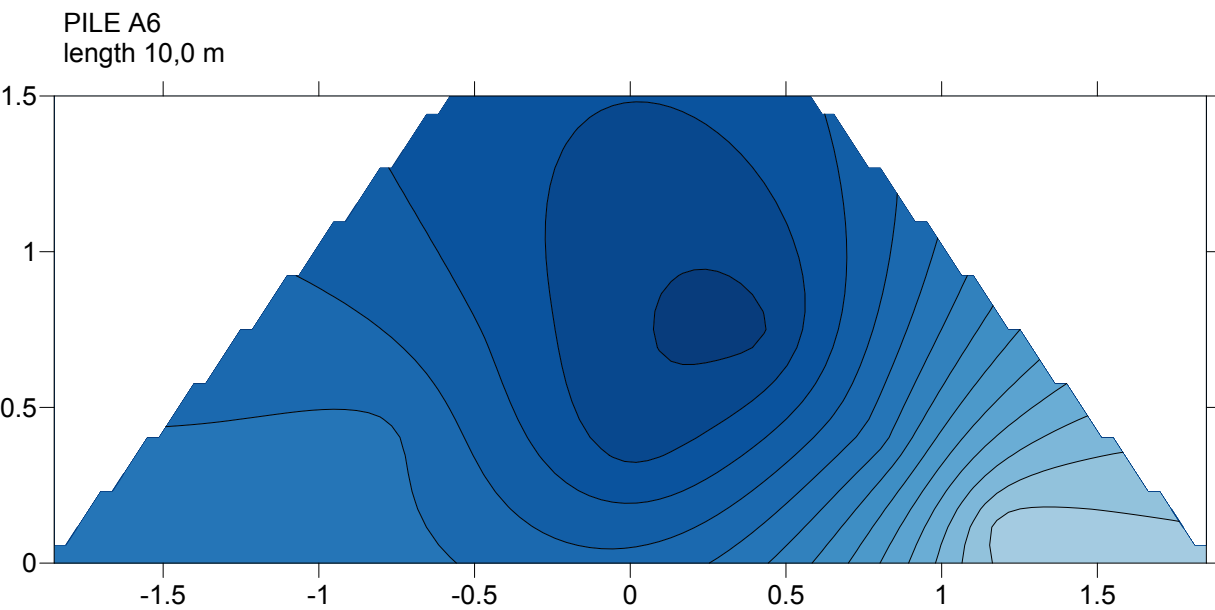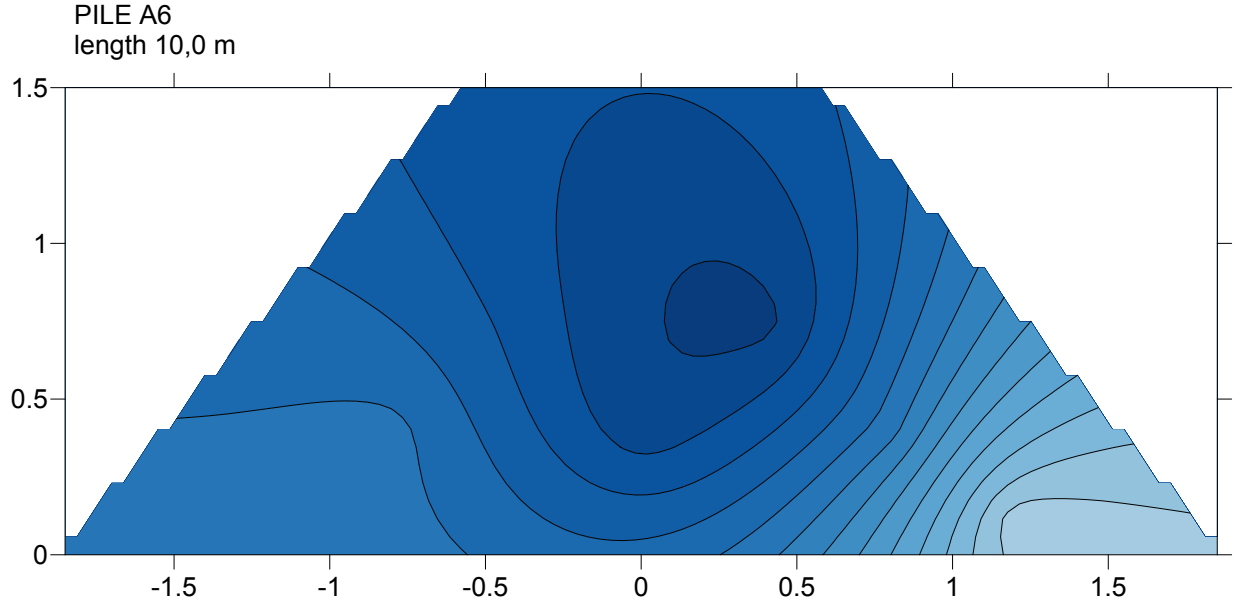

Supplement: s1 [file s1]

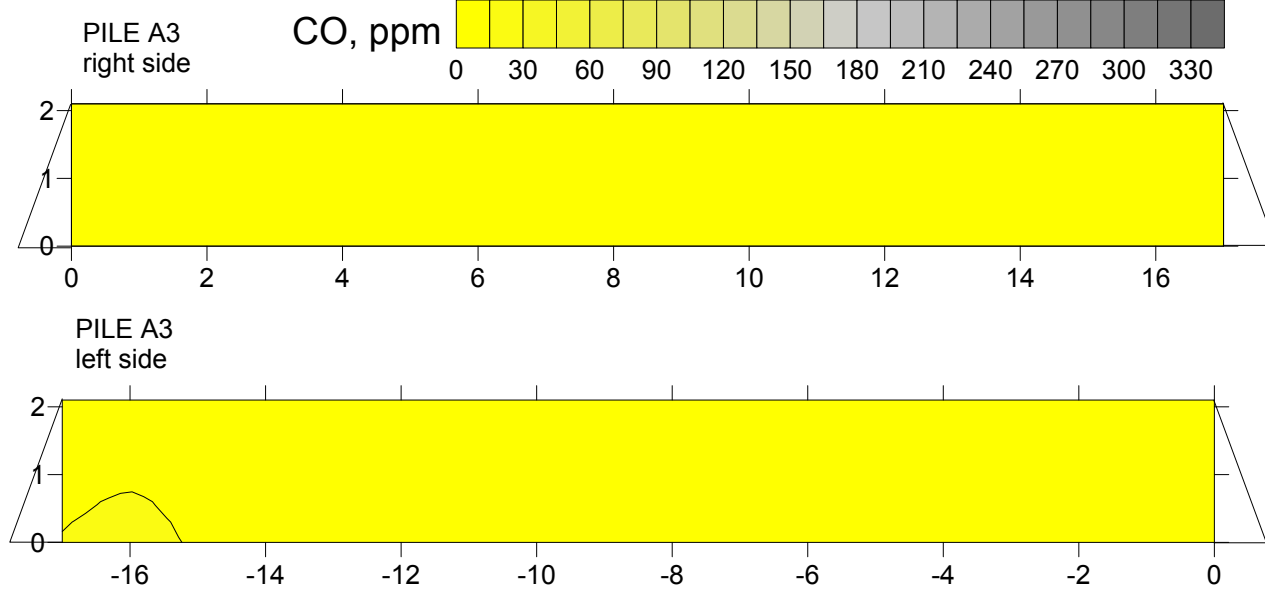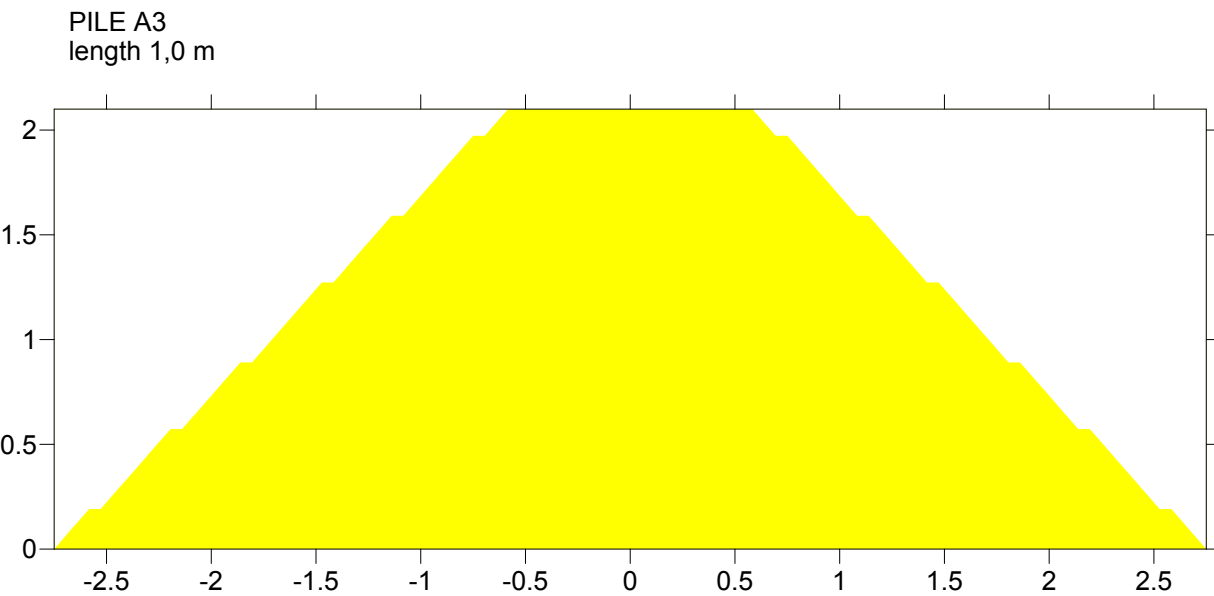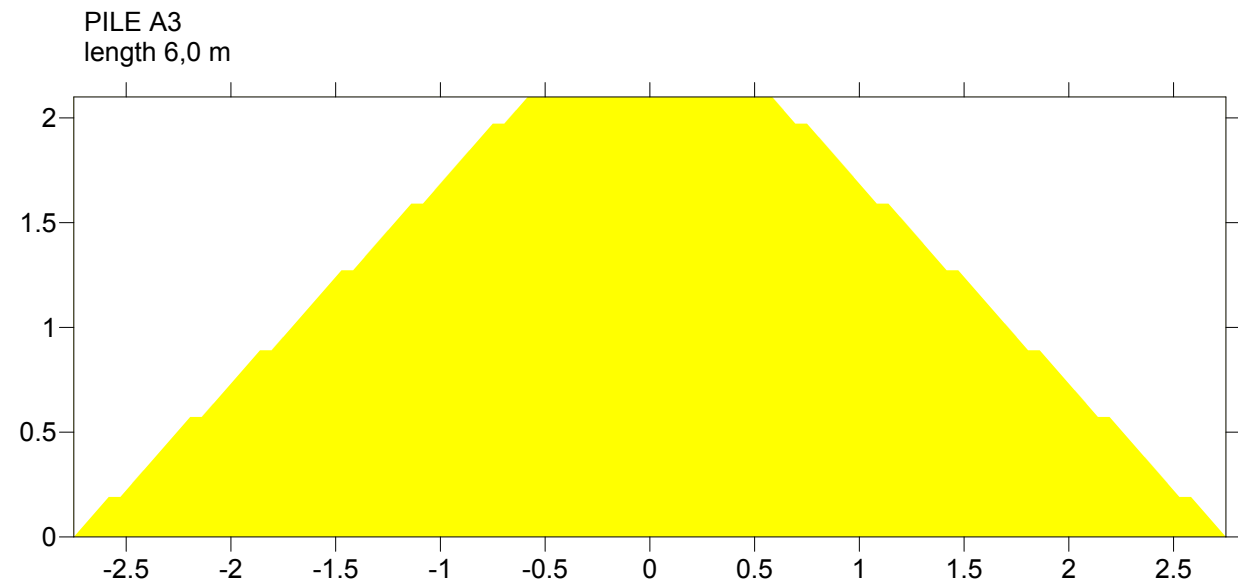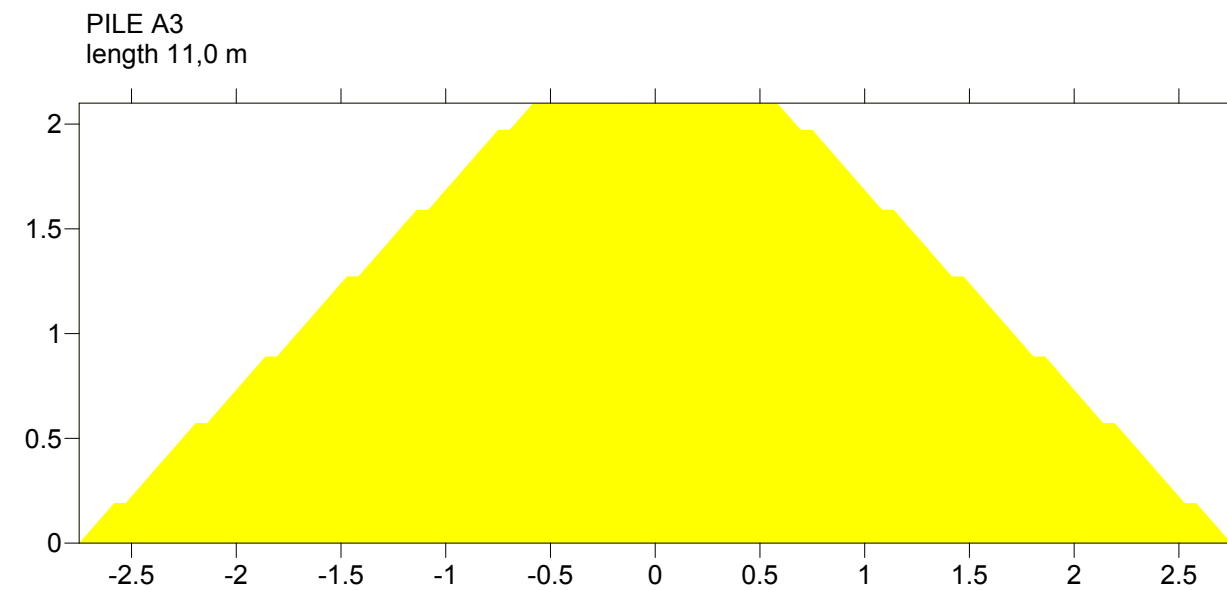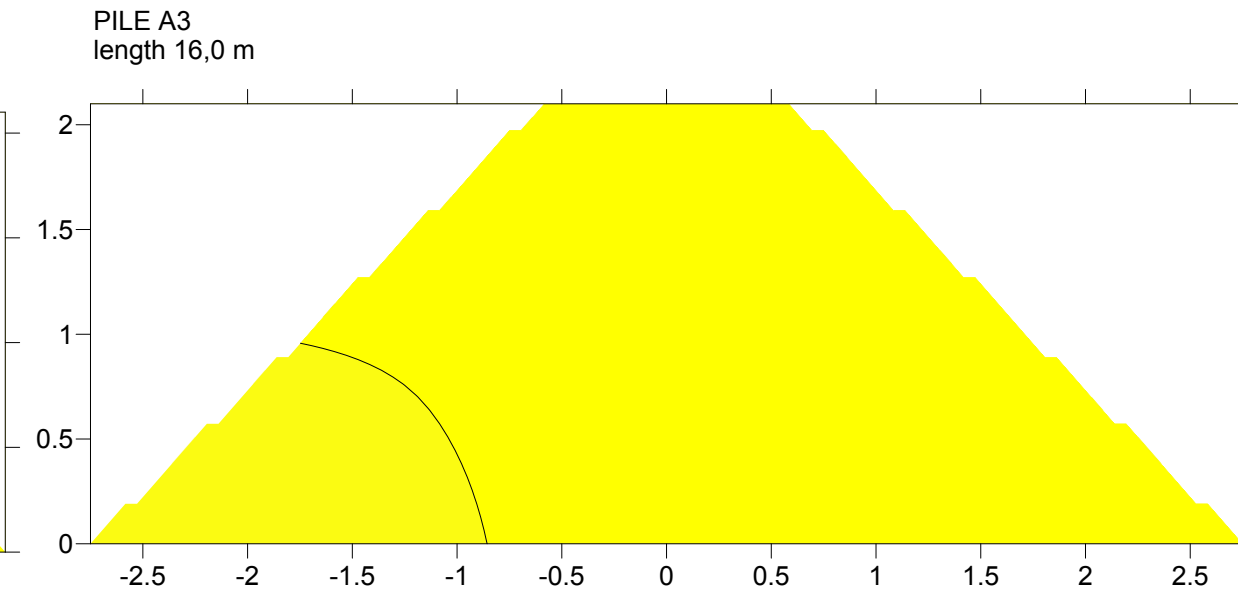

Supplement: s1 [file s1]

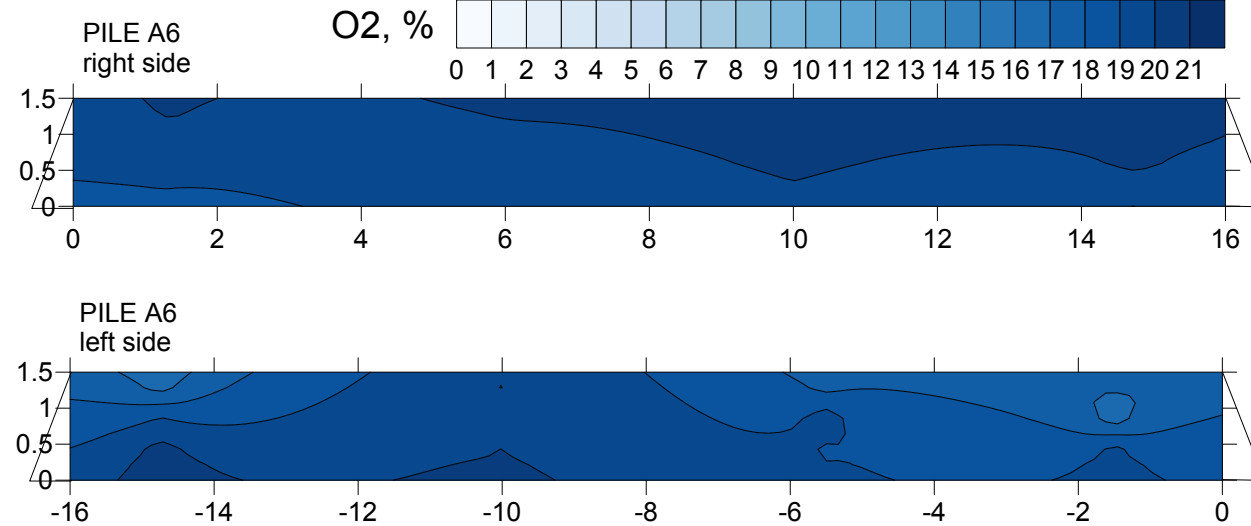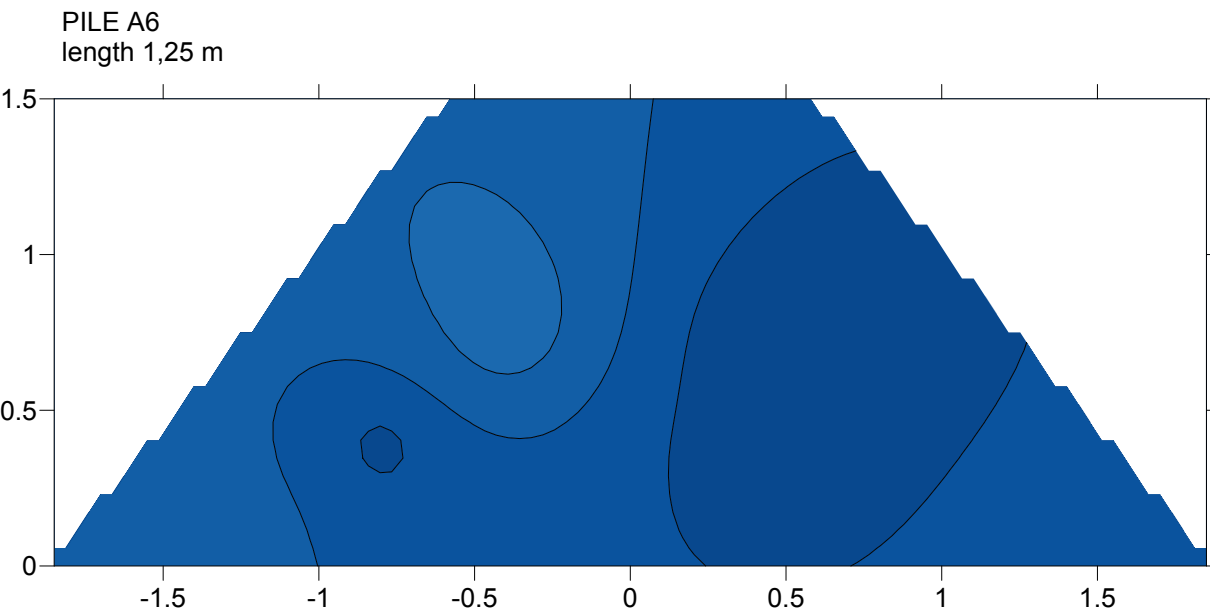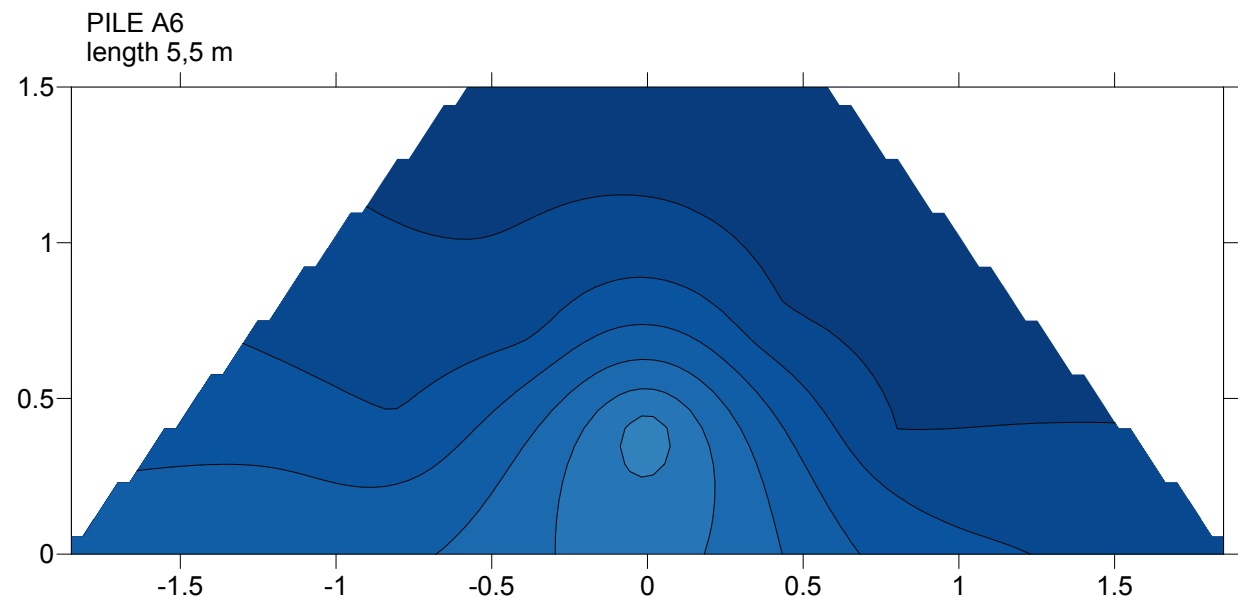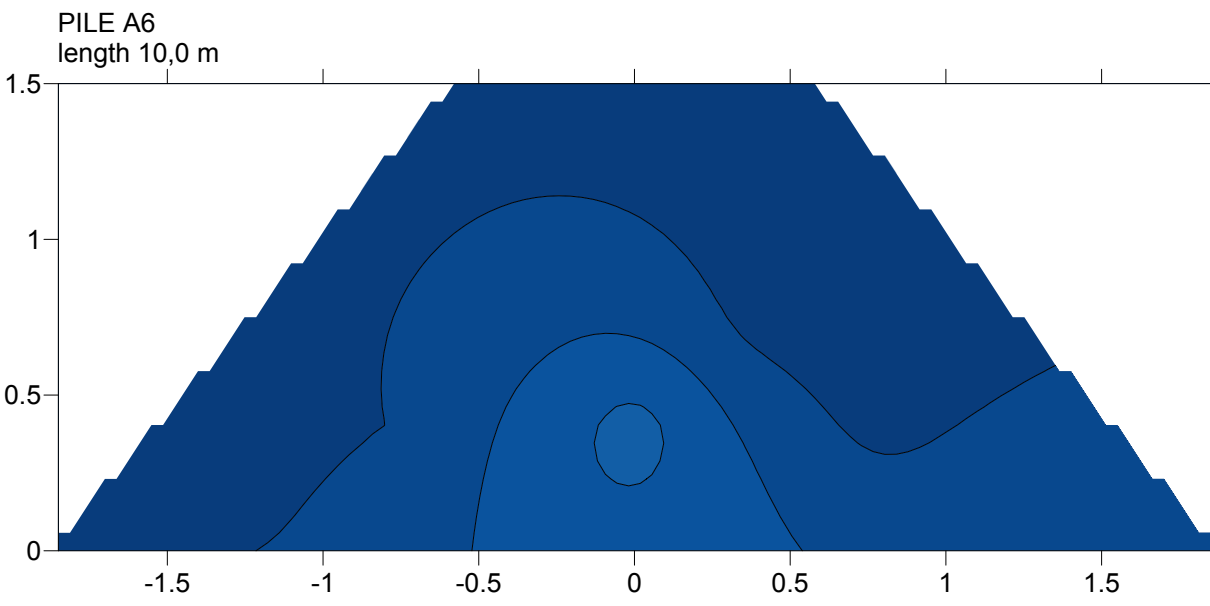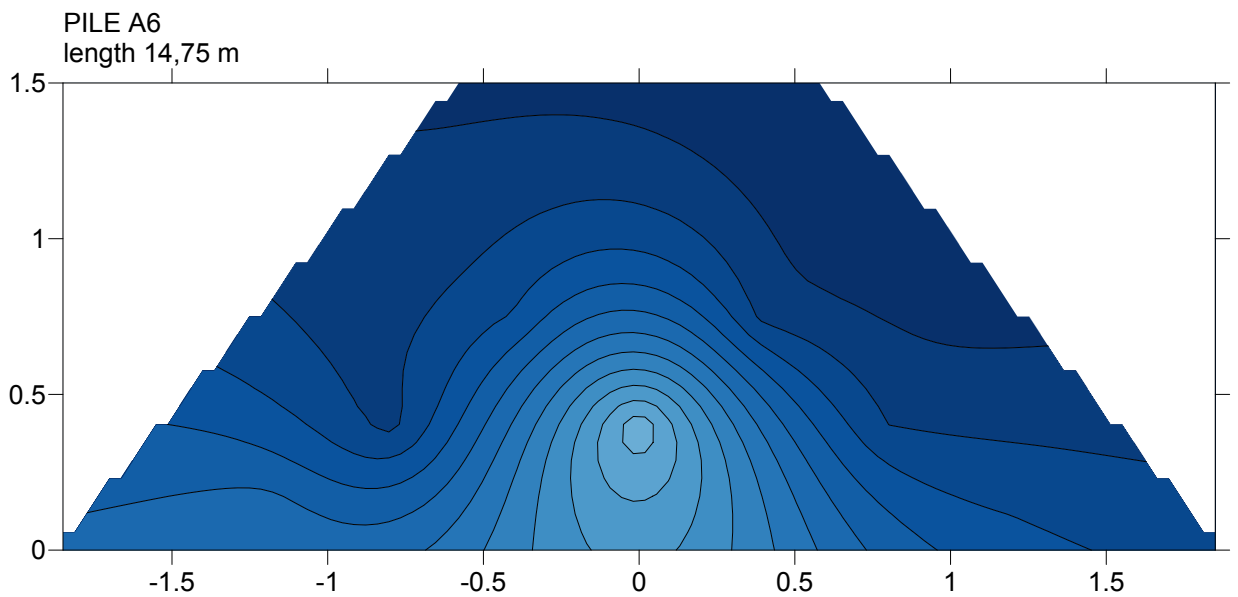

Supplement: s1 [file s1]

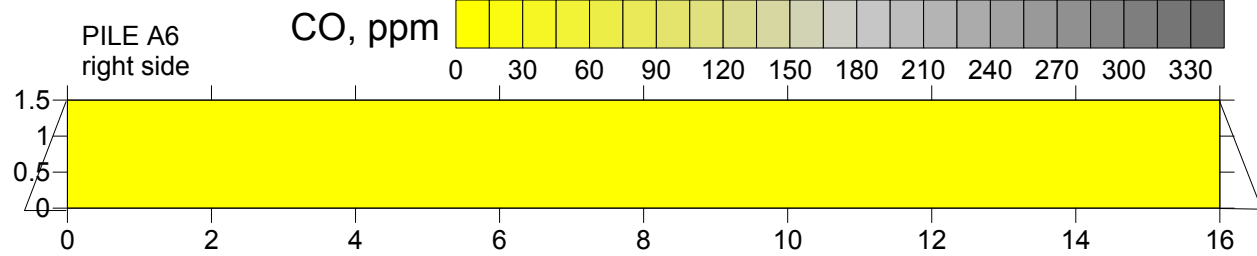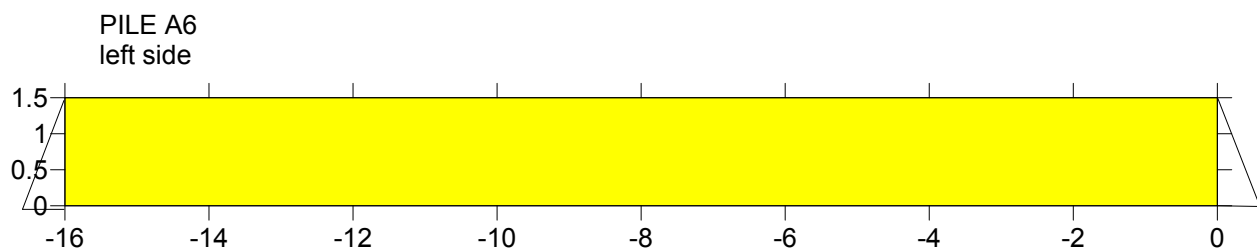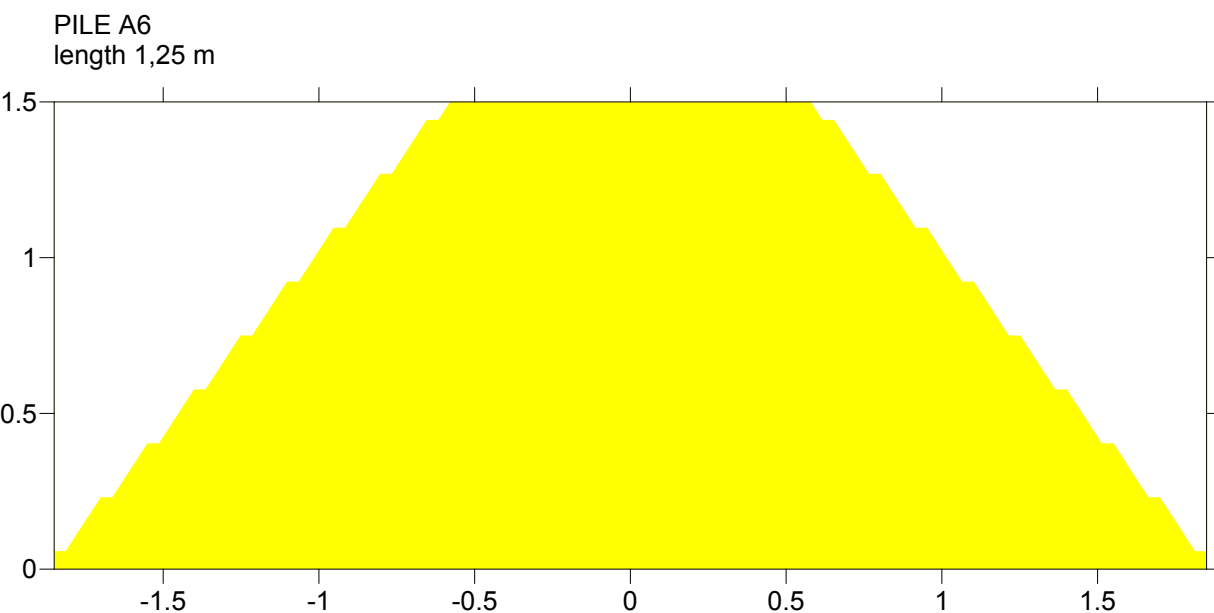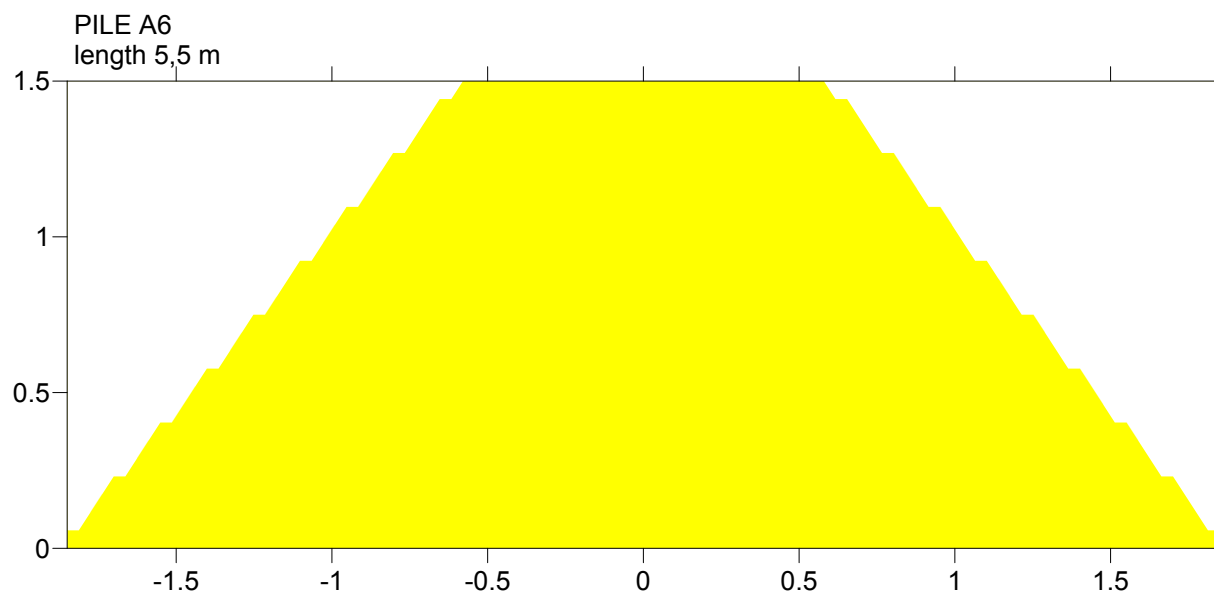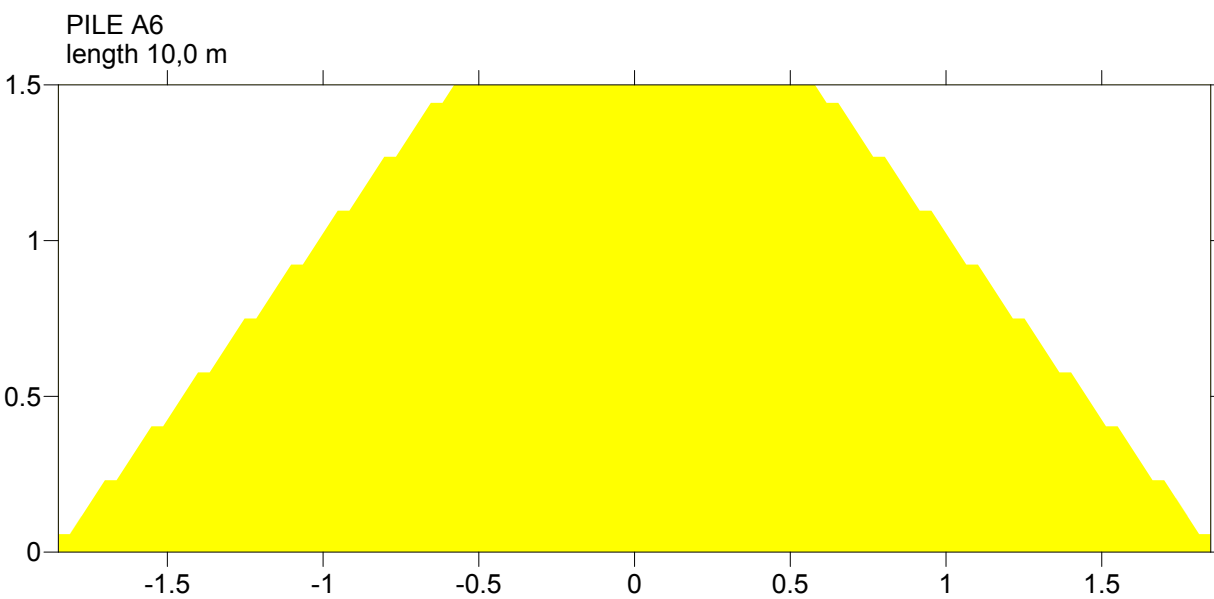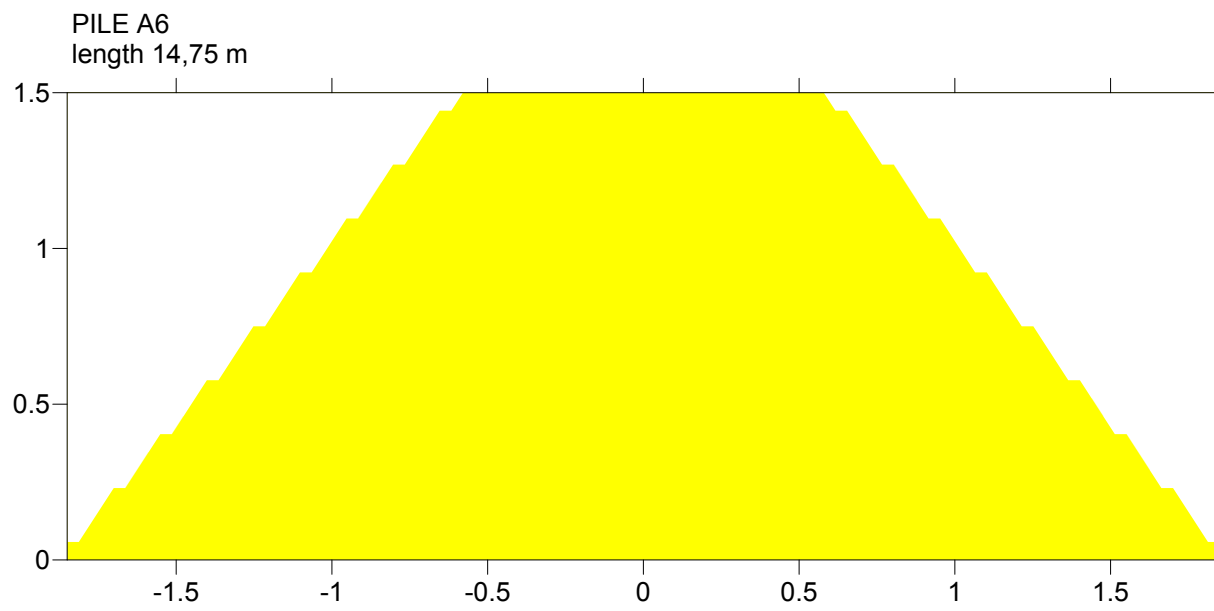

Supplement: s1 [file s1]

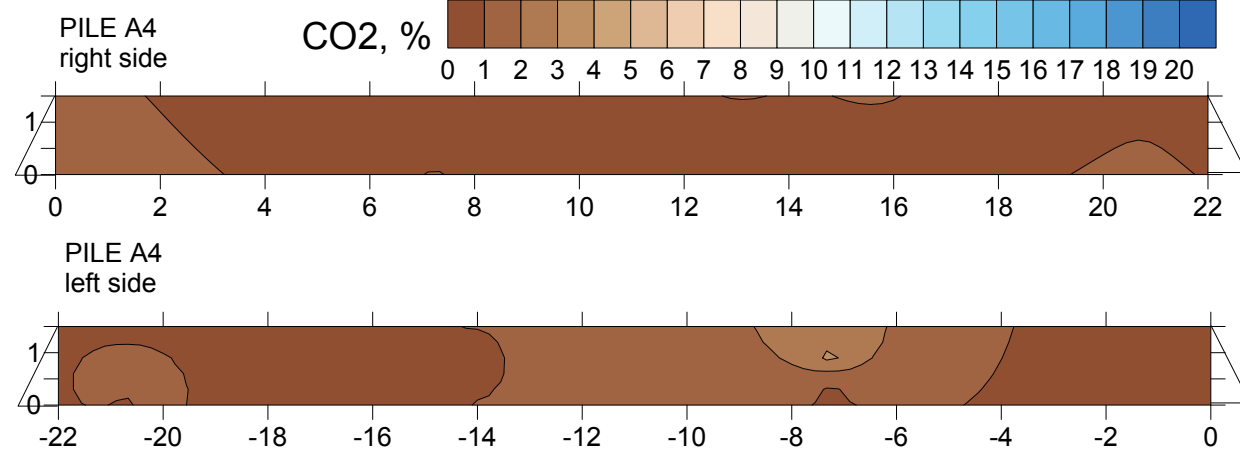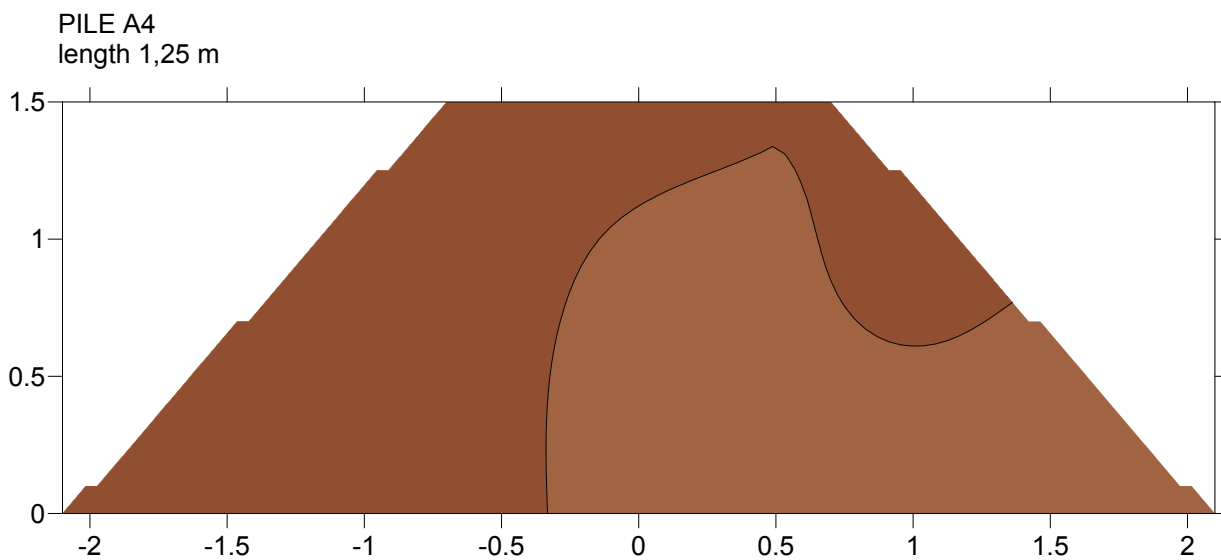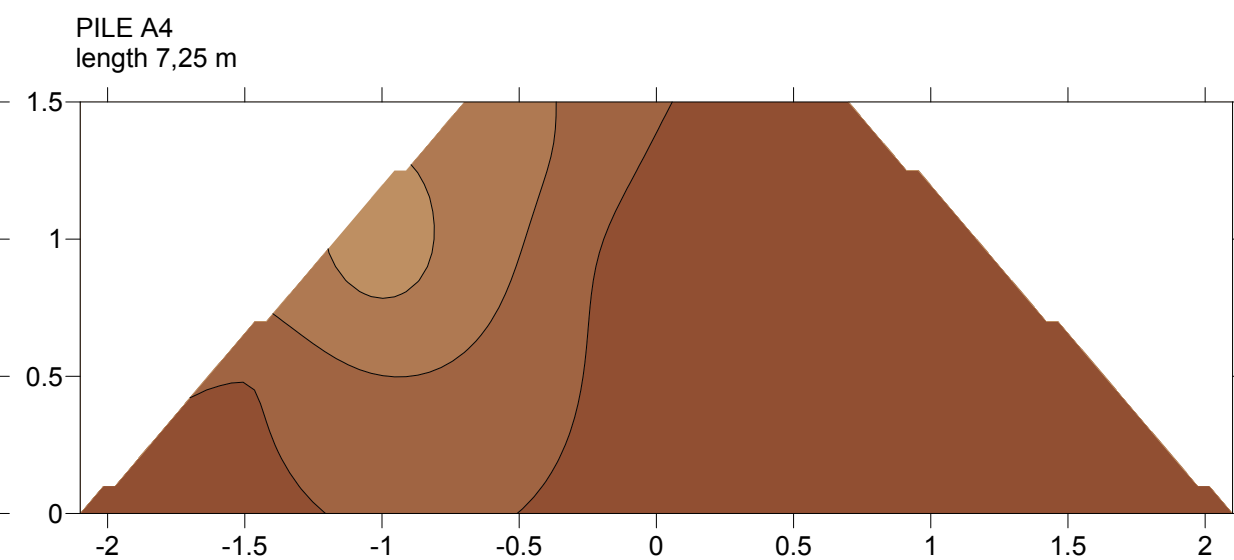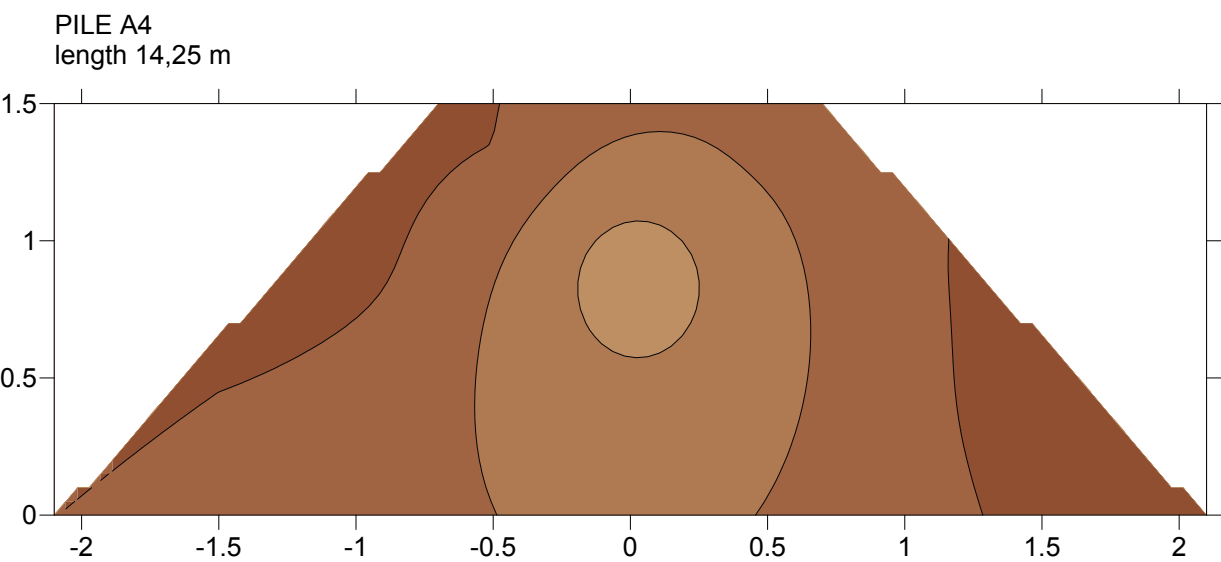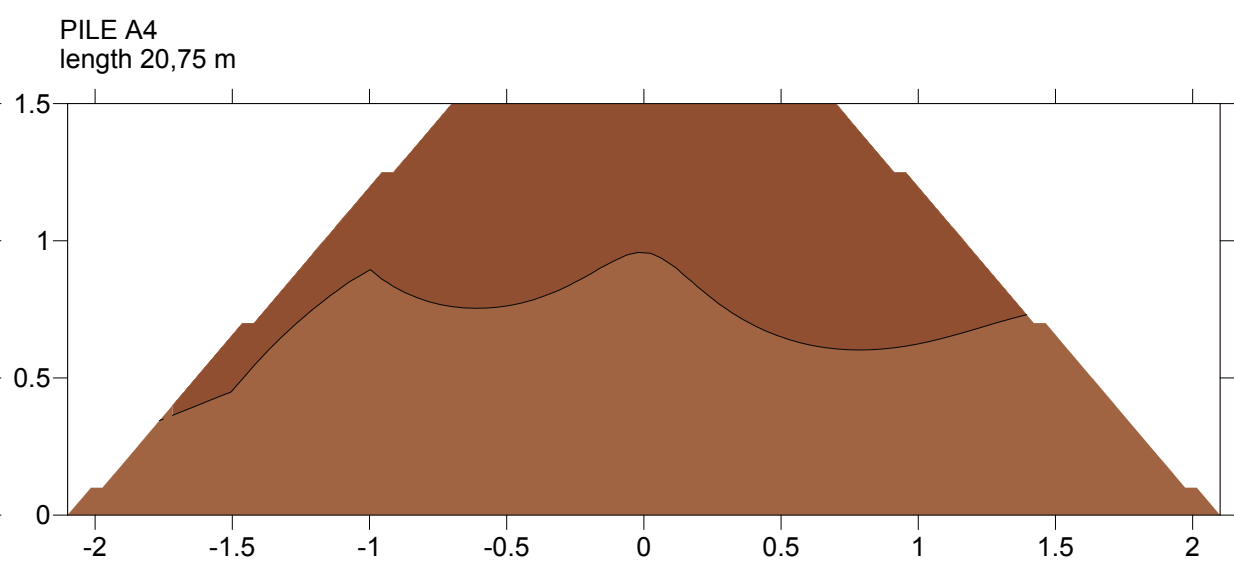

Supplement: s1 [file s1]

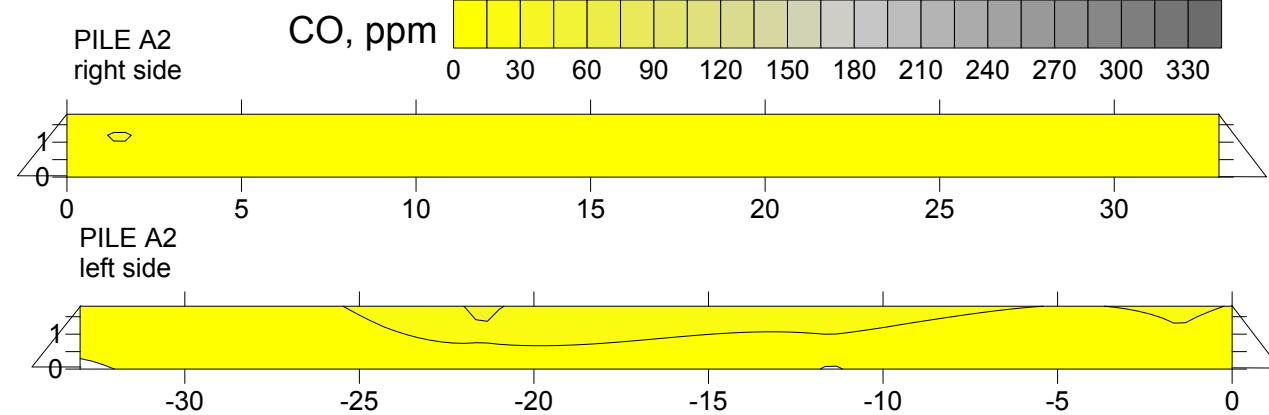

PILE A2  
length 1,5 m

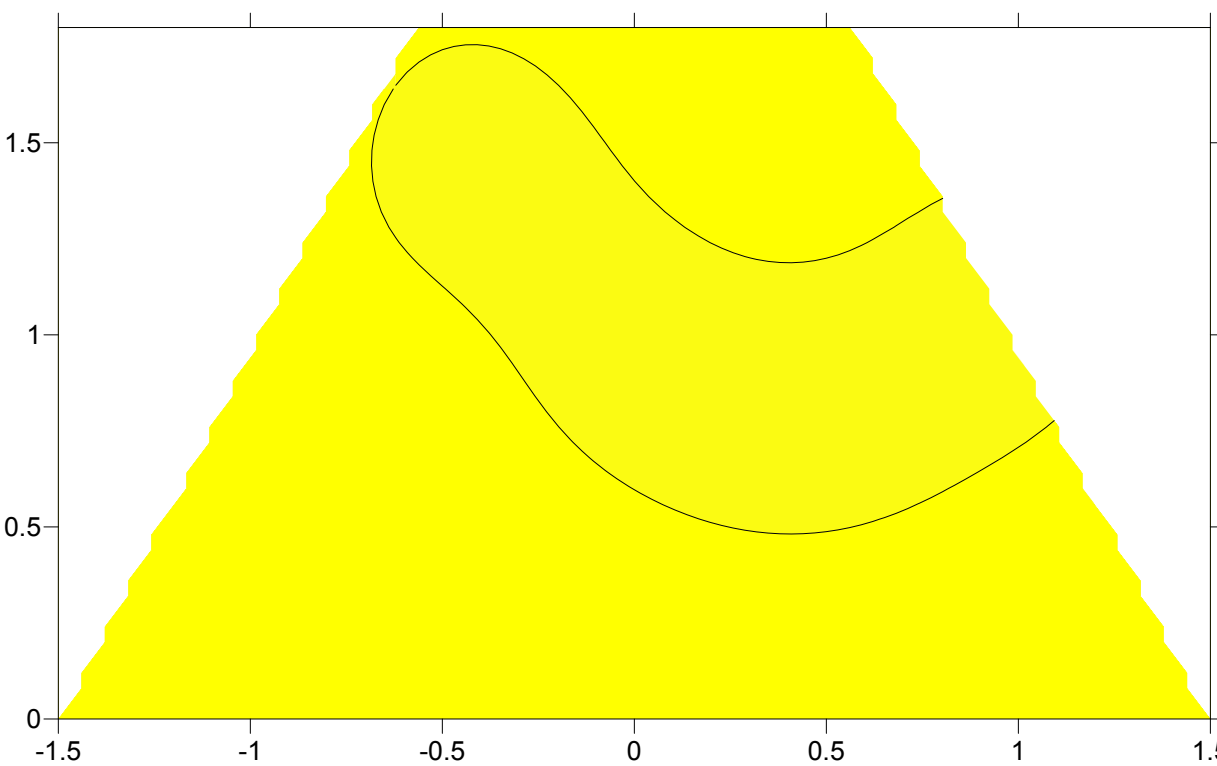

PILE A2  
length 11,5 m

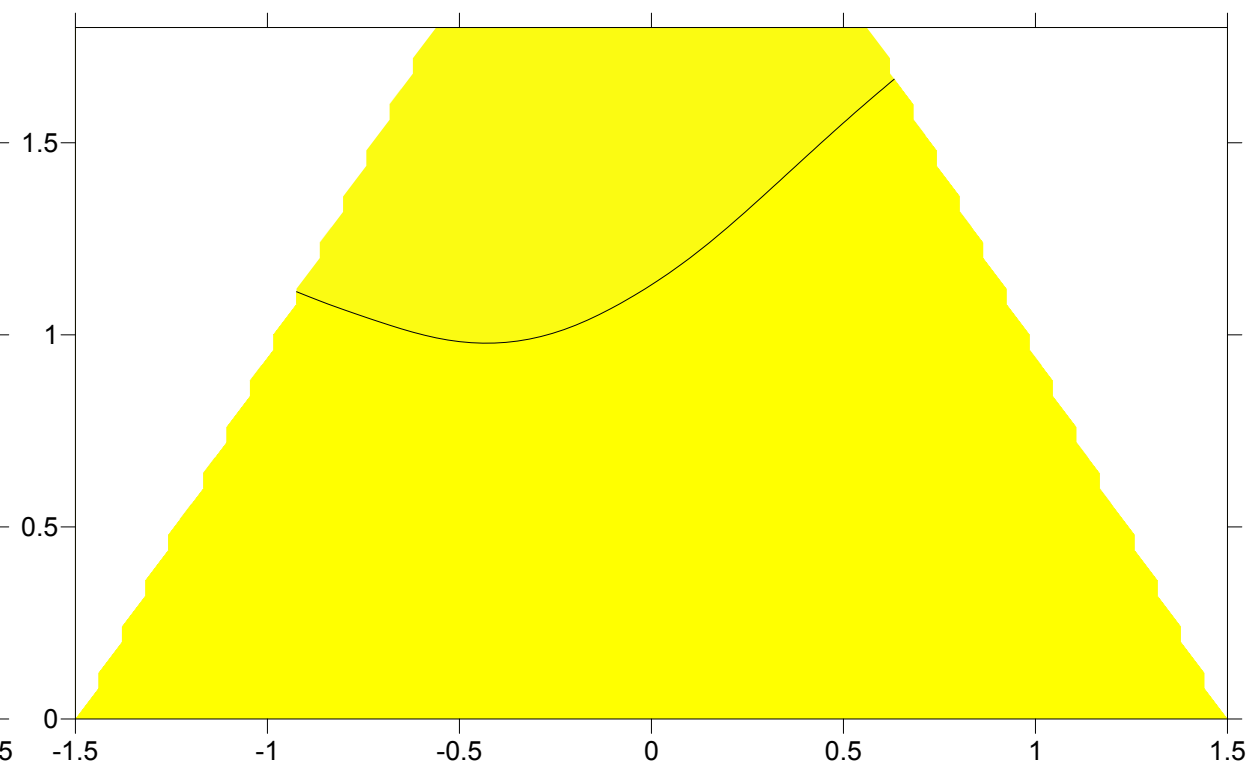

PILE A2  
length 21,5 m

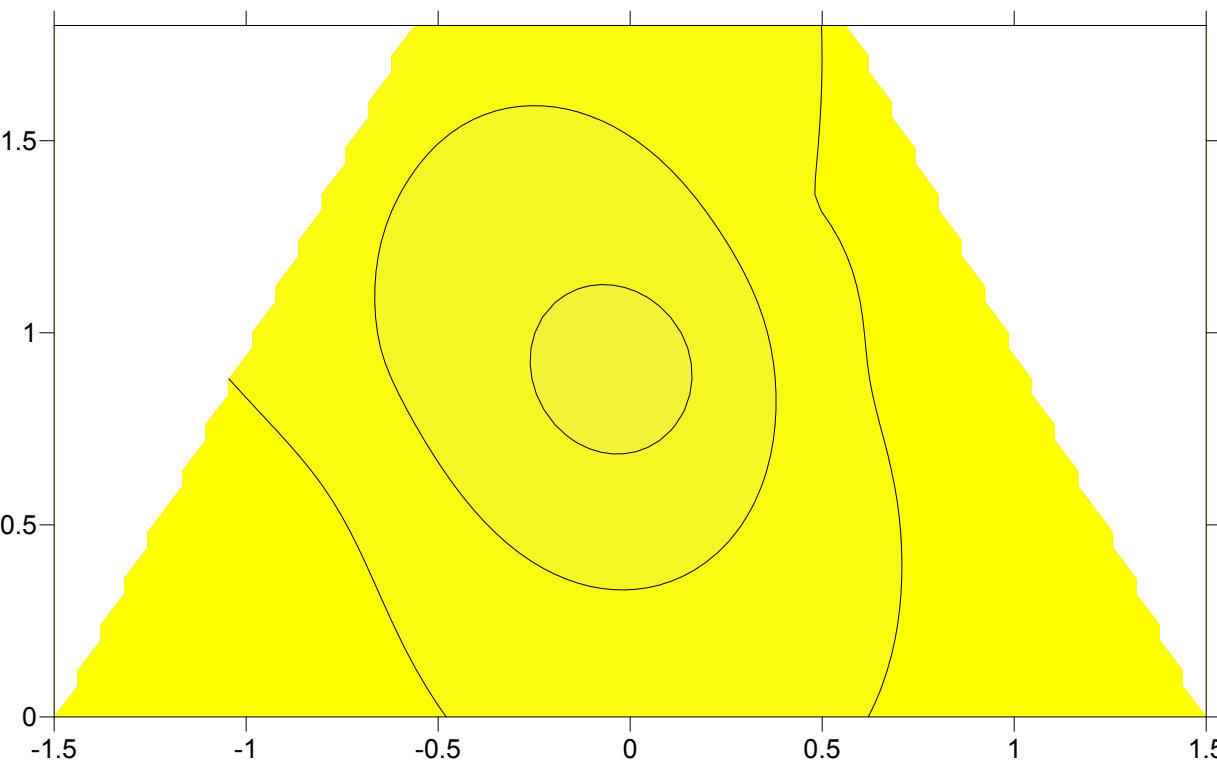

PILE A2  
length 31,5 m

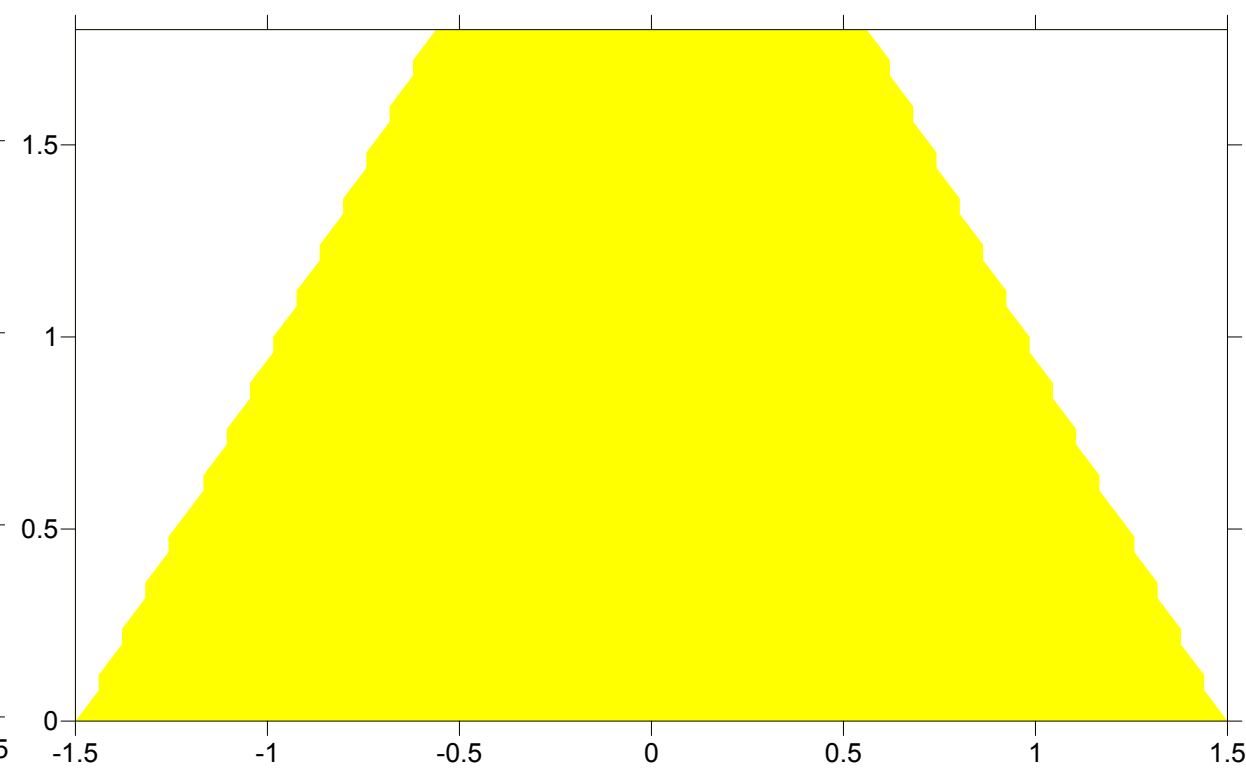

Supplement: s1 [file s1]

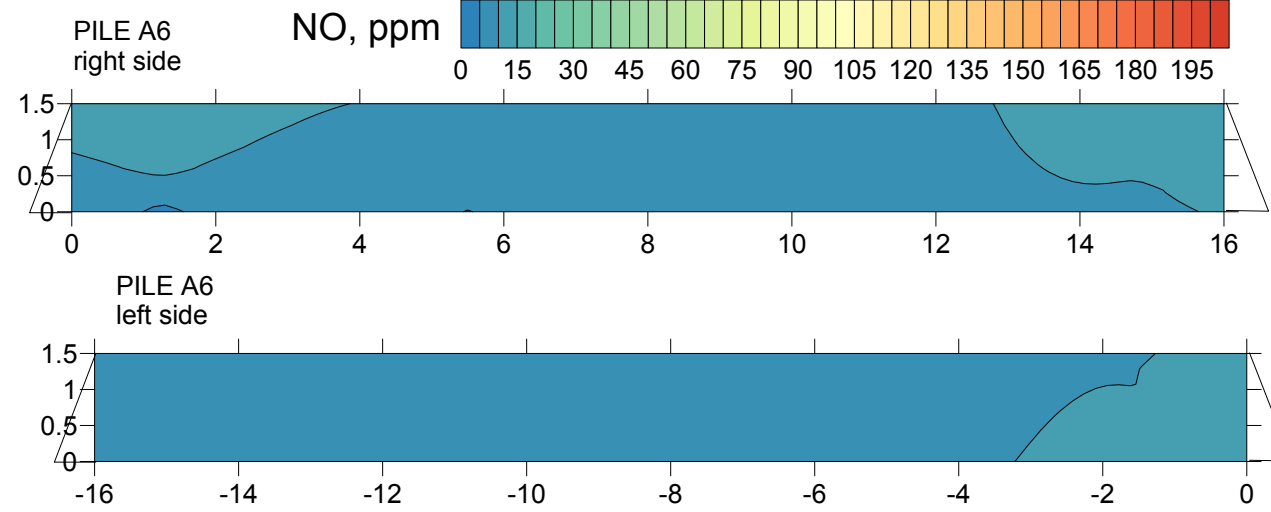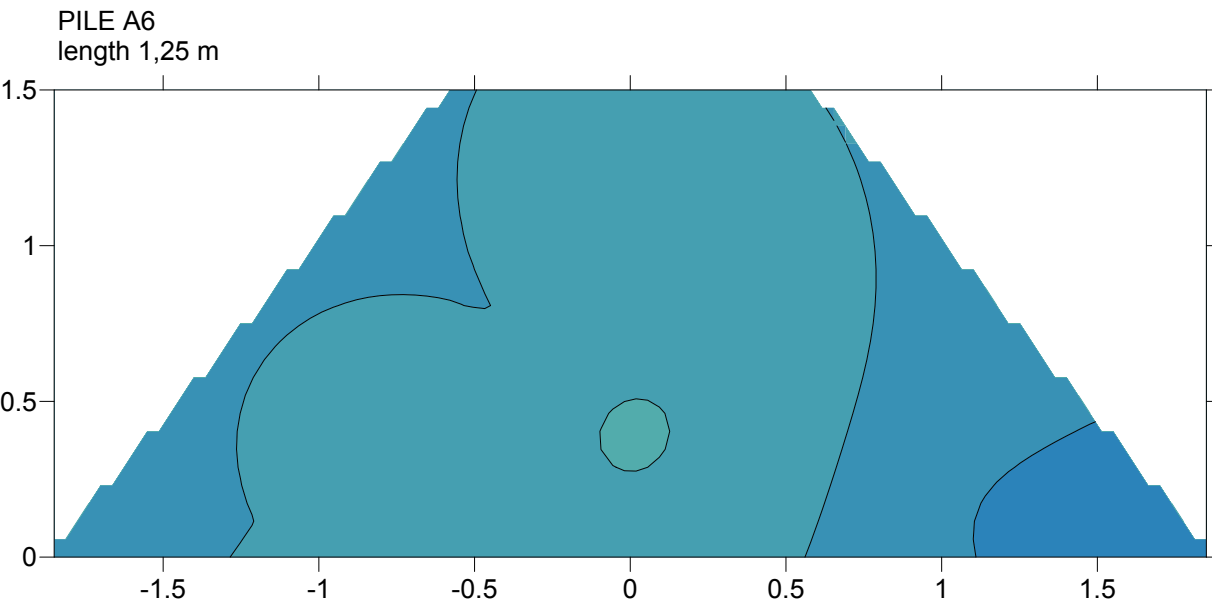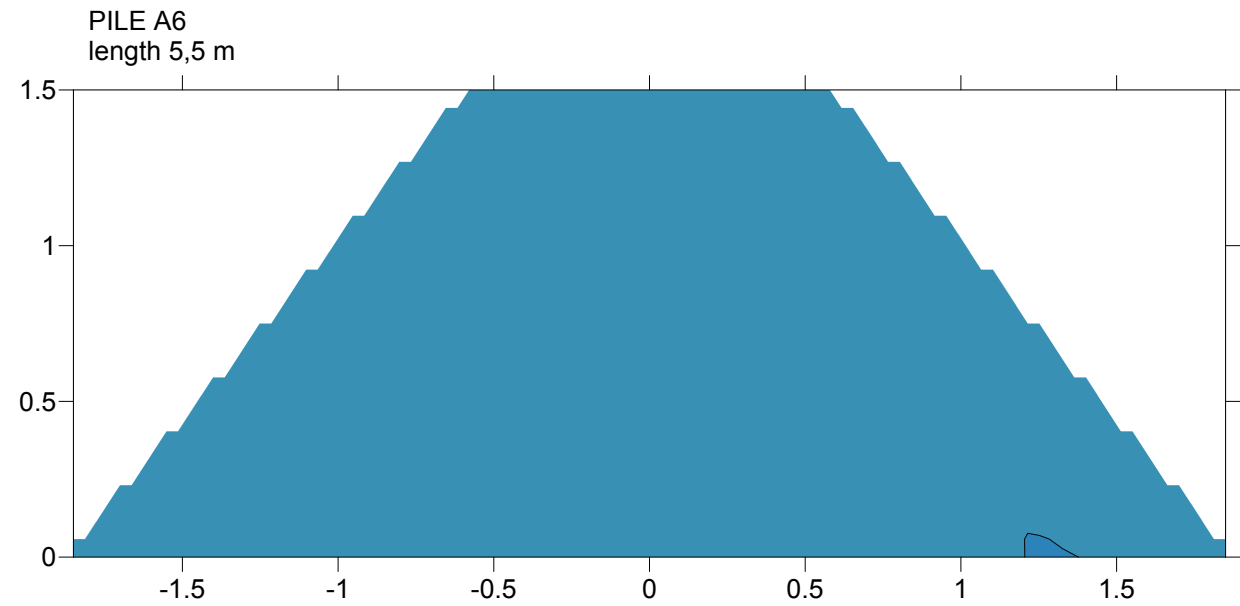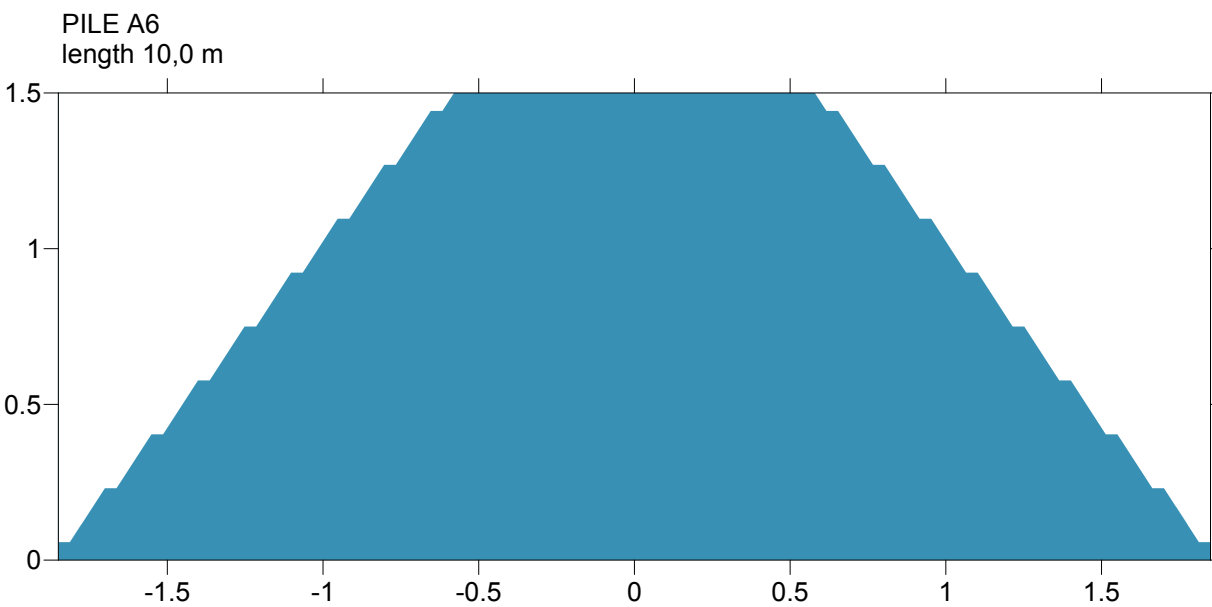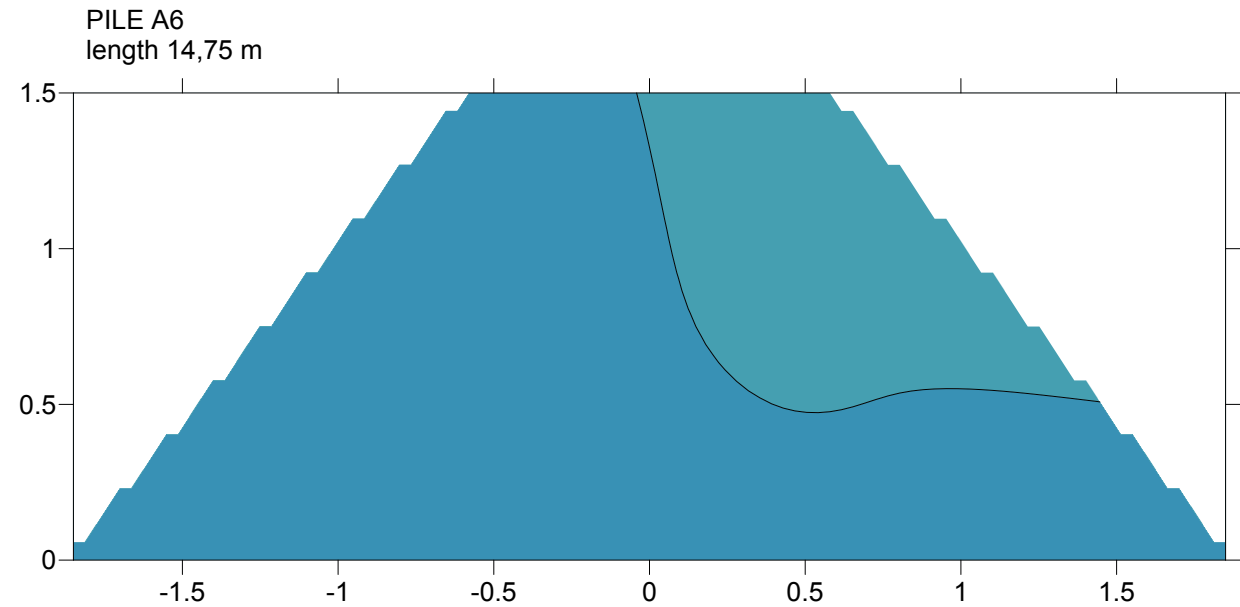

Supplement: s1 [file s1]

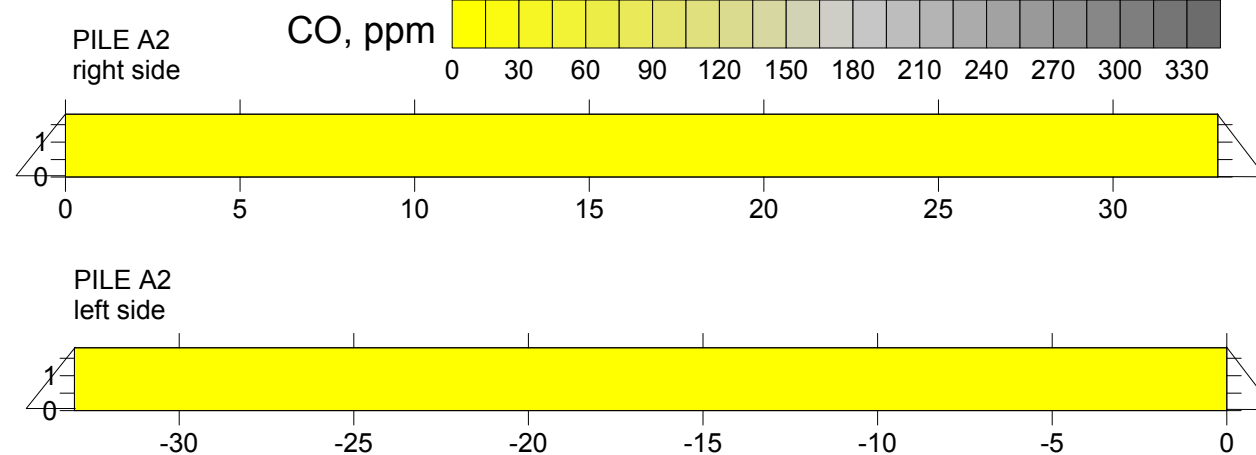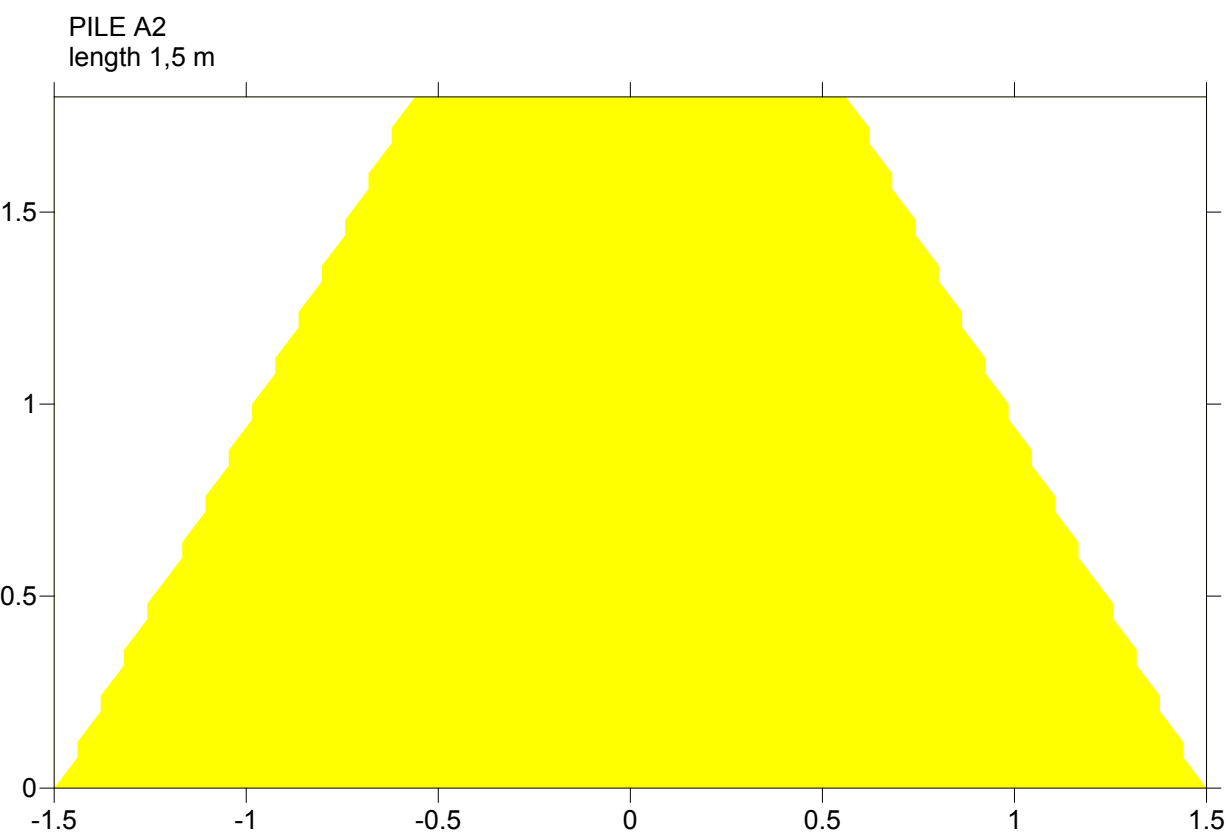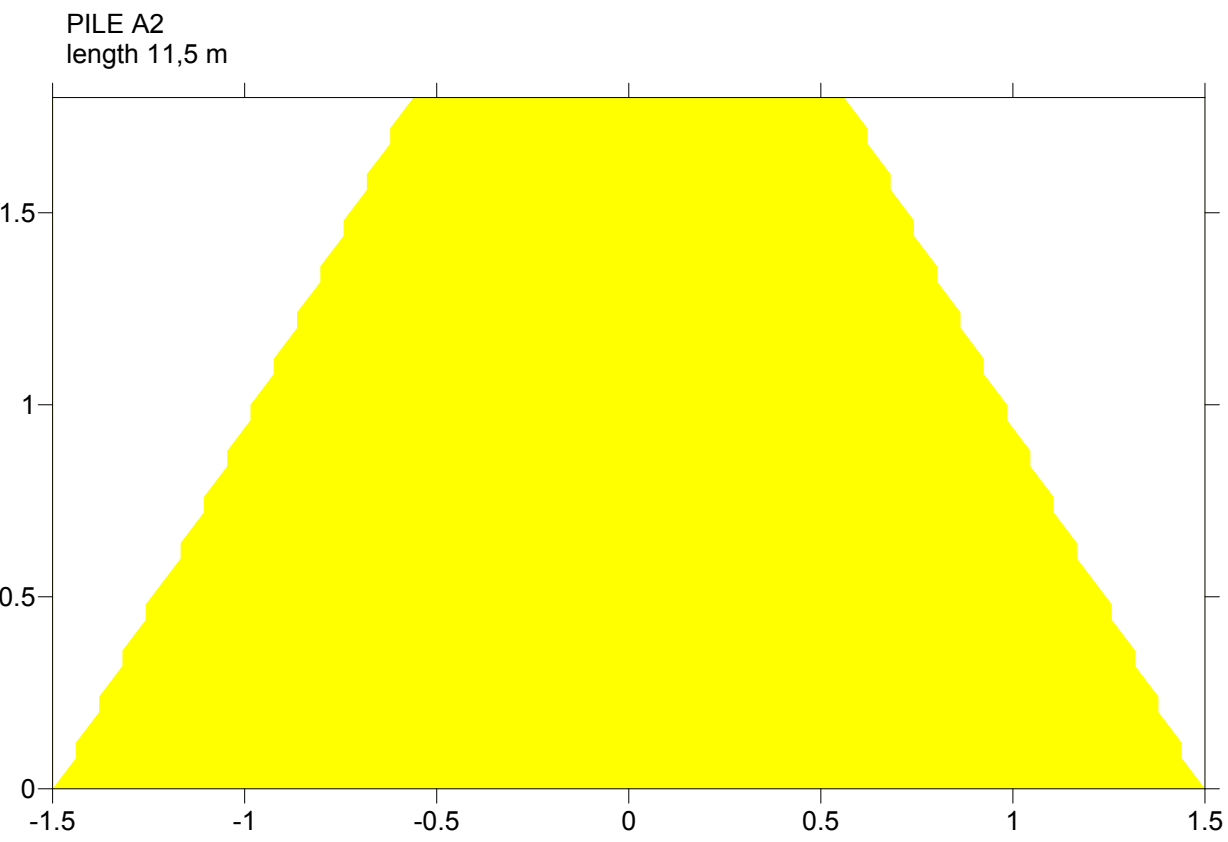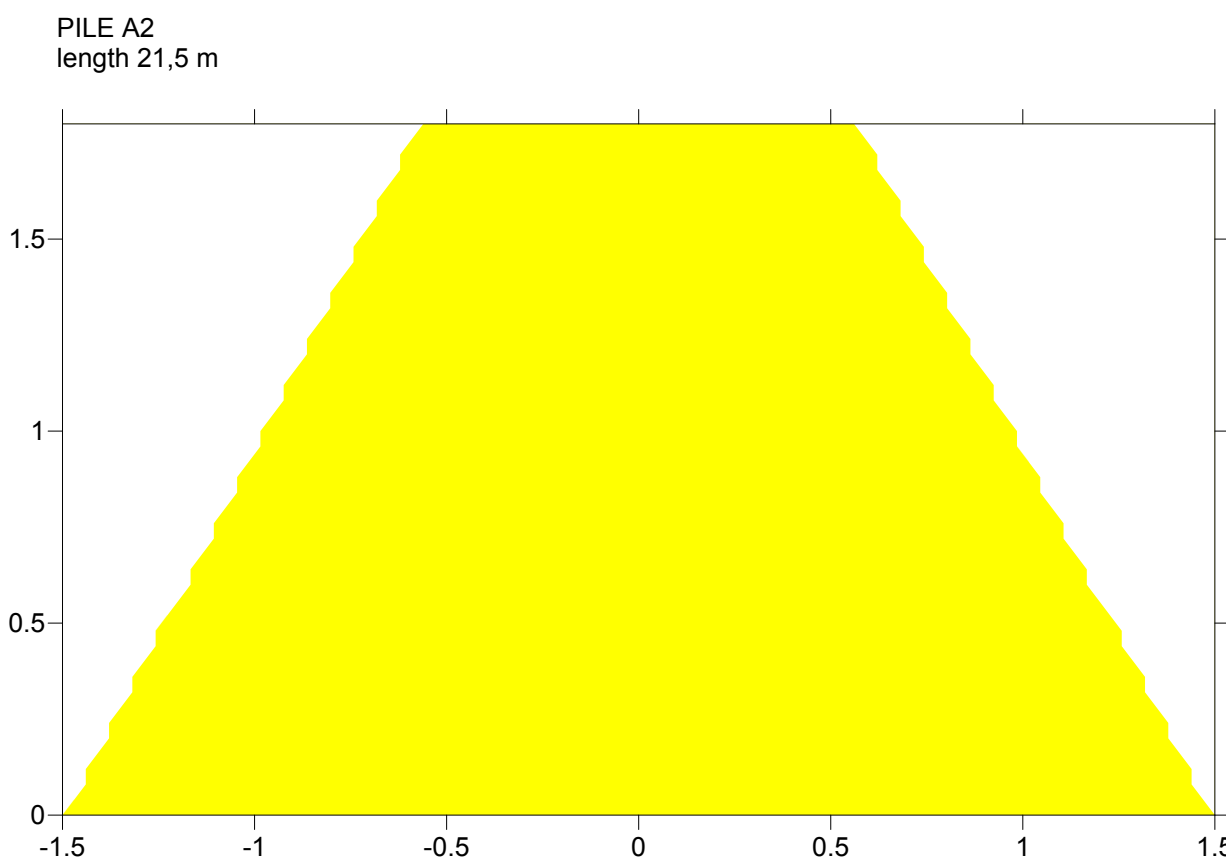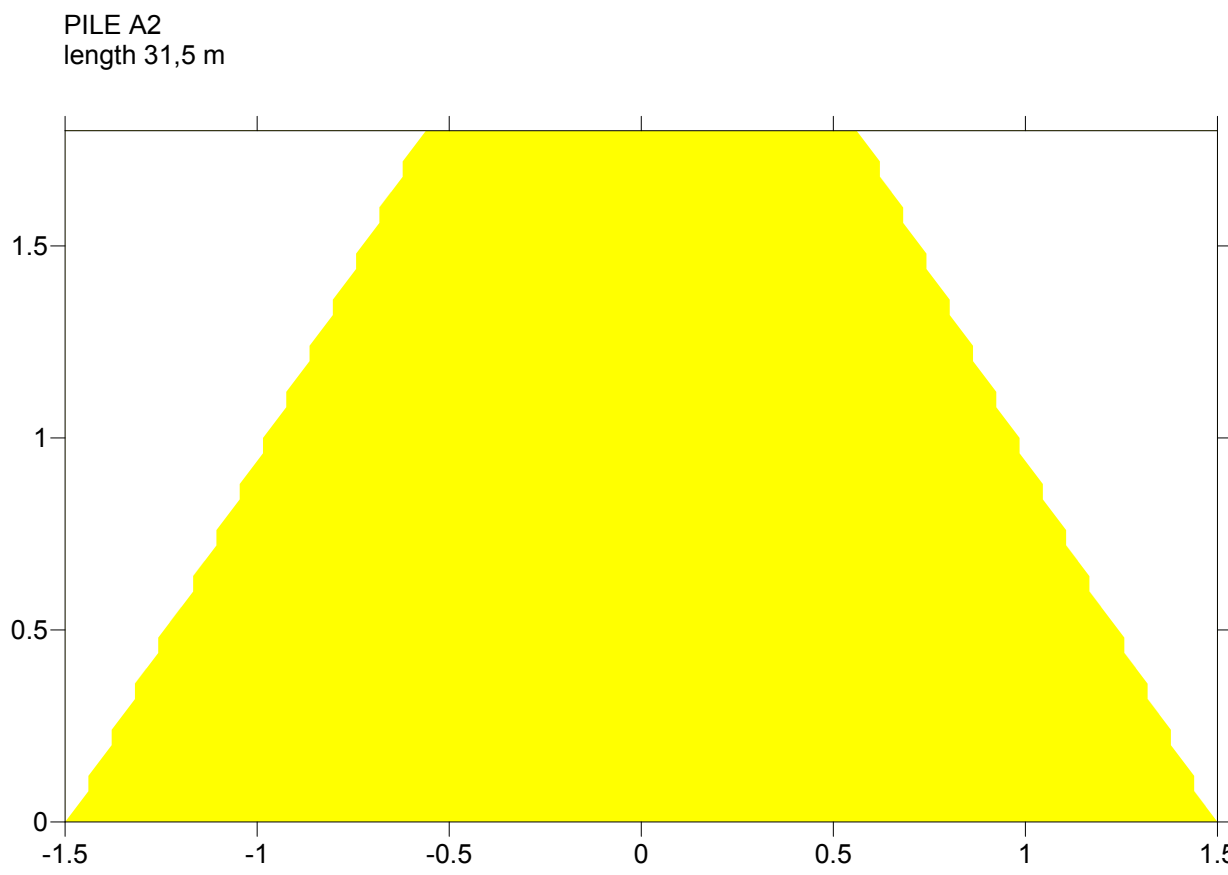

Supplement: s1 [file s1]

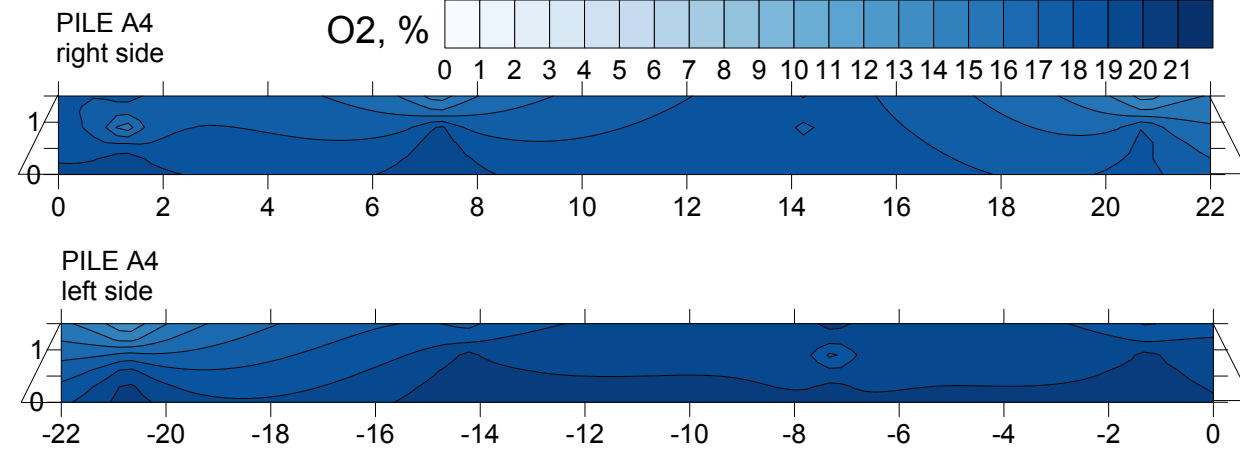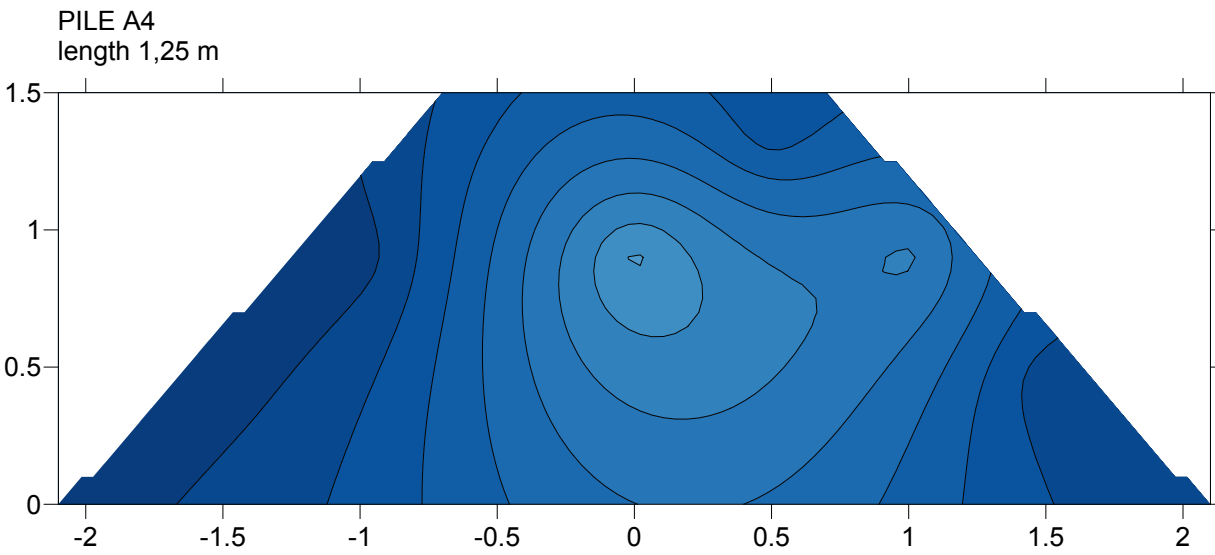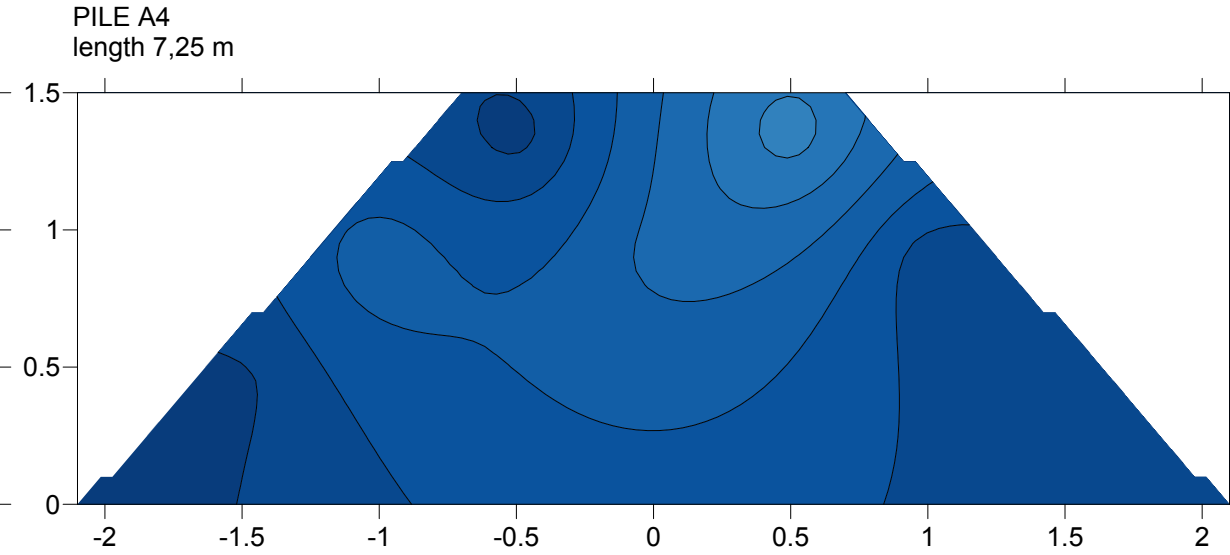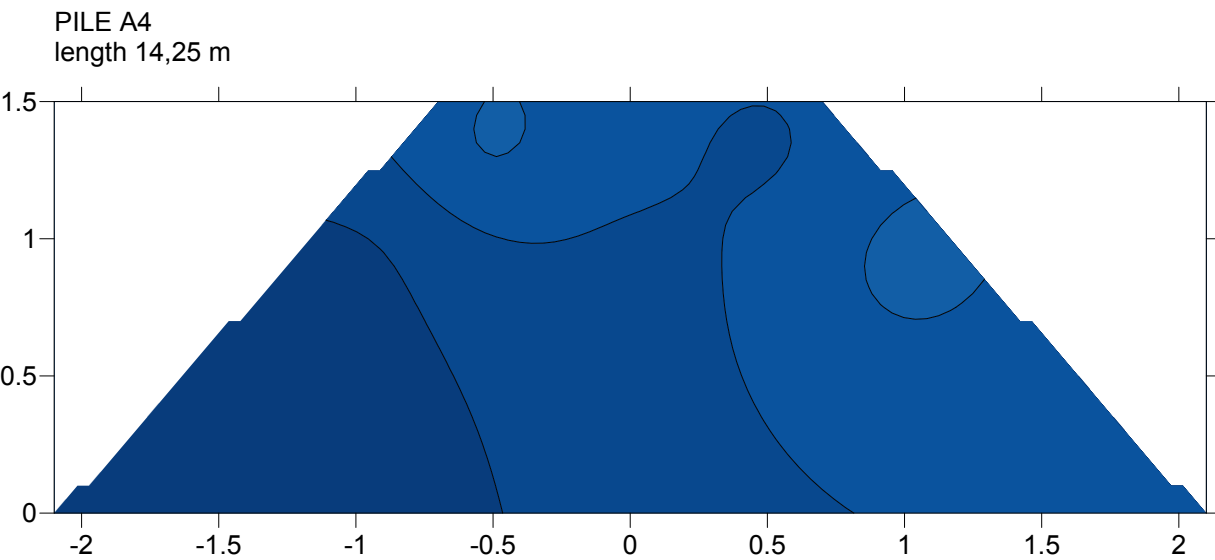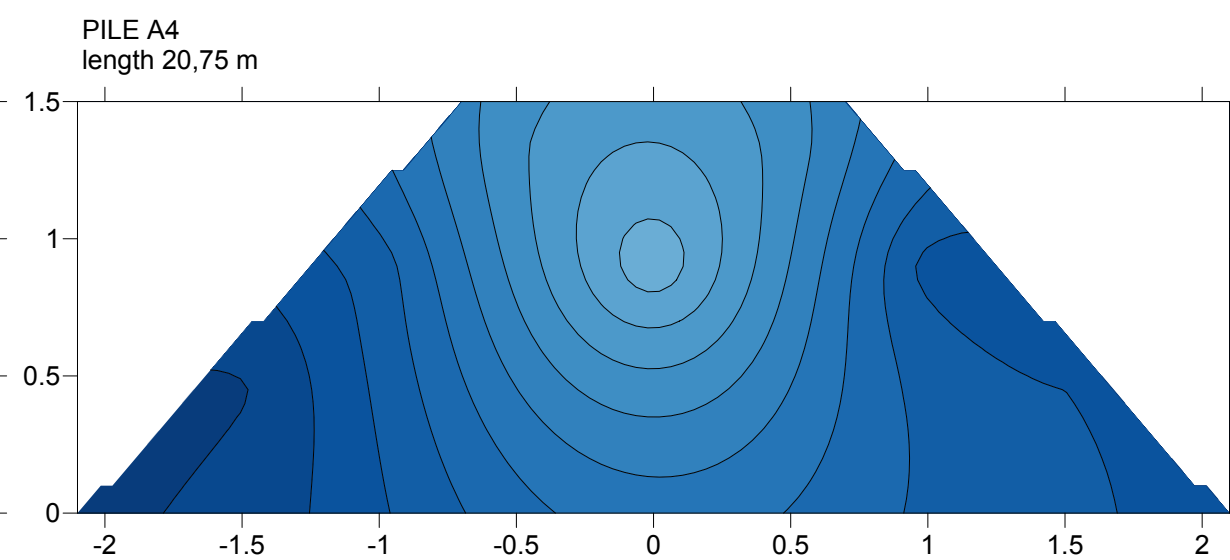

Supplement: s1 [file s1]

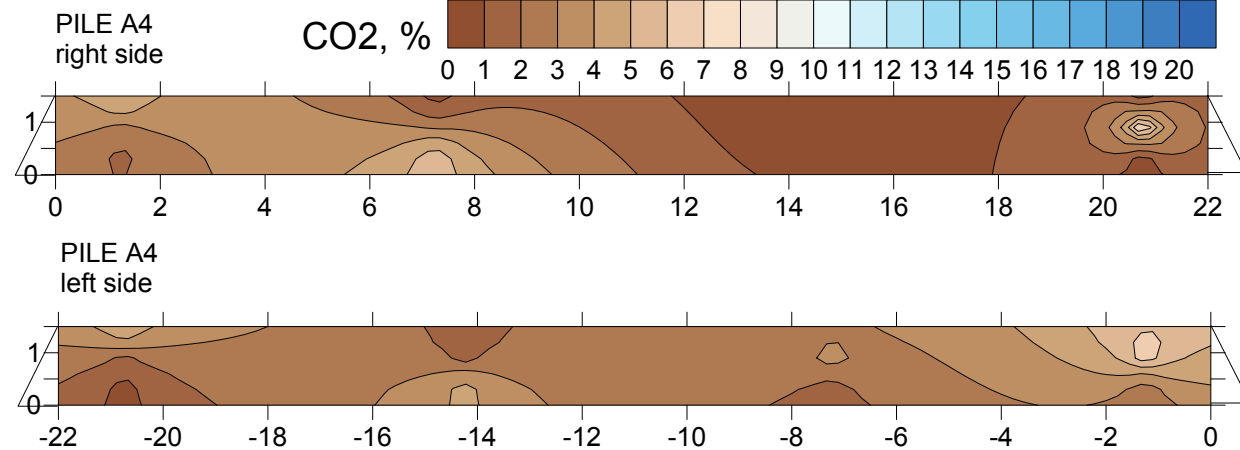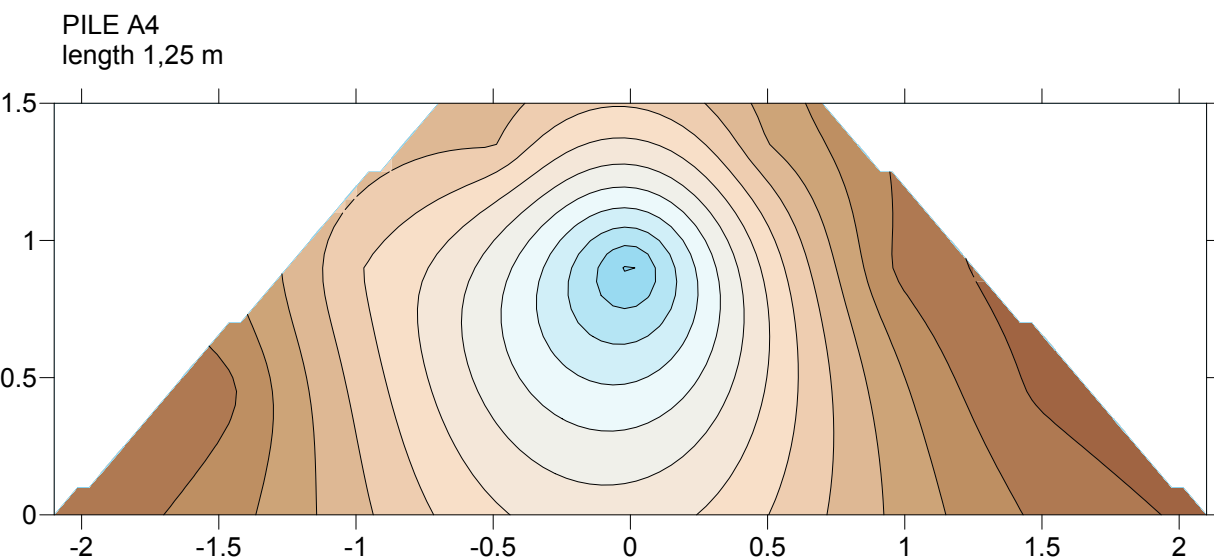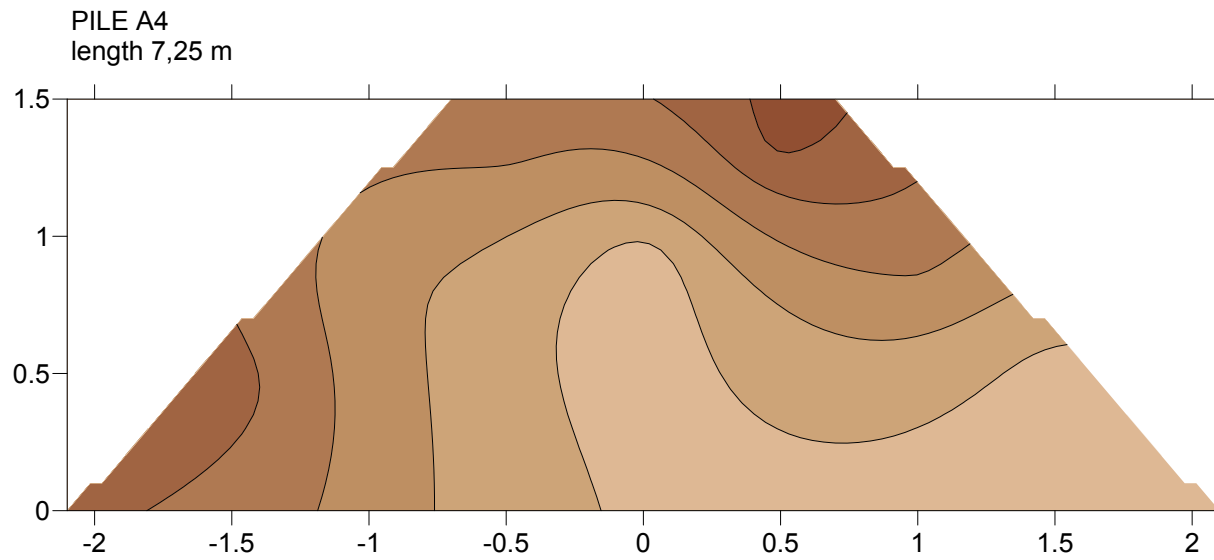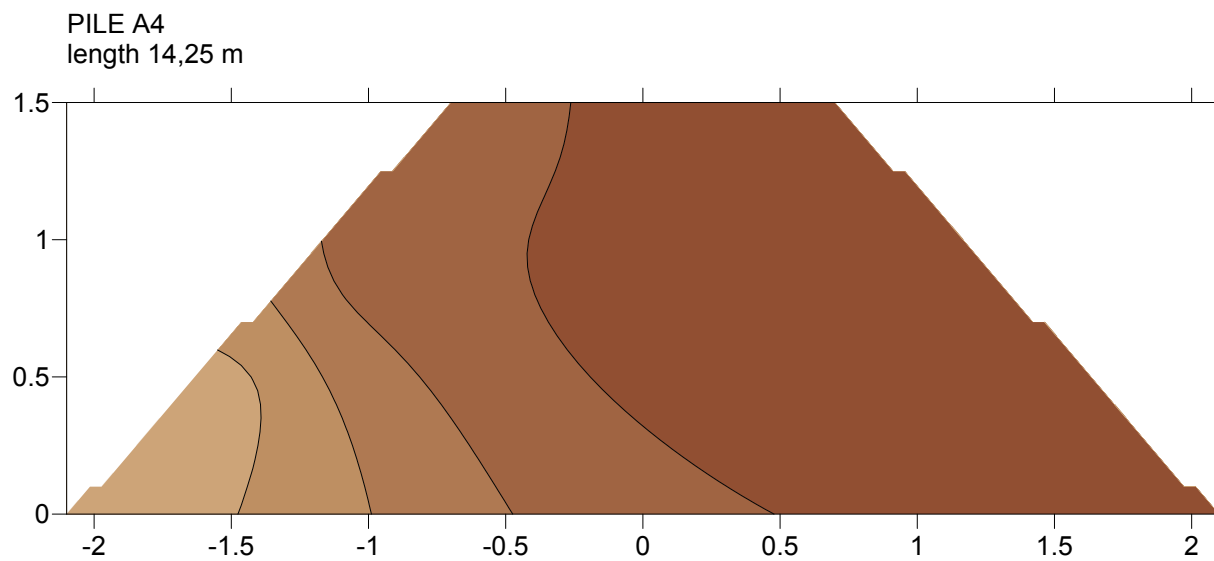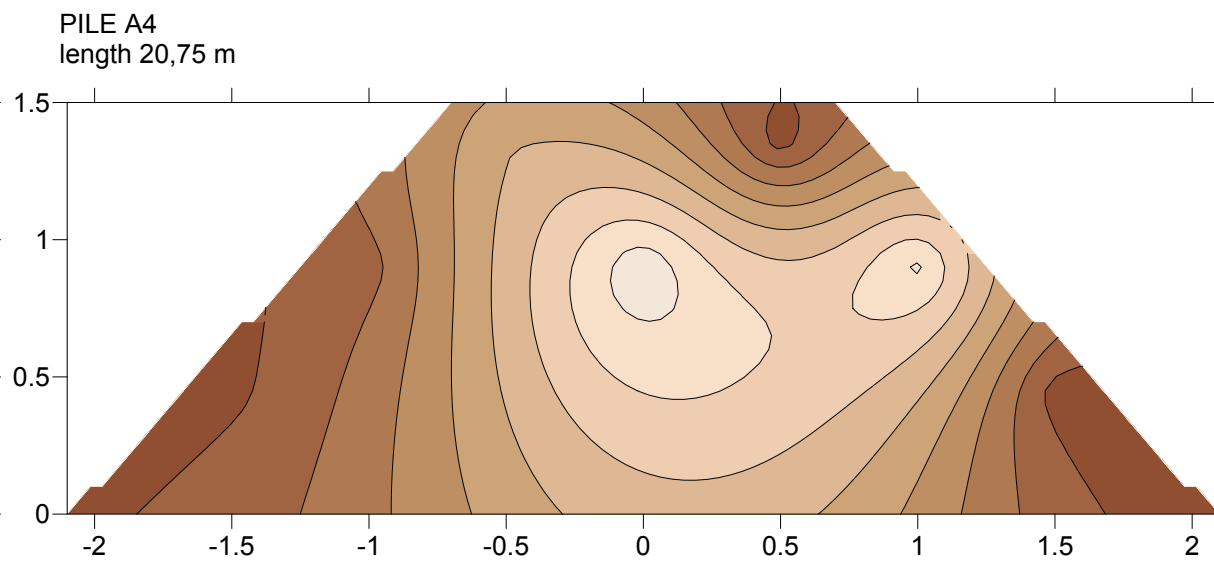

Supplement: s1 [file s1]

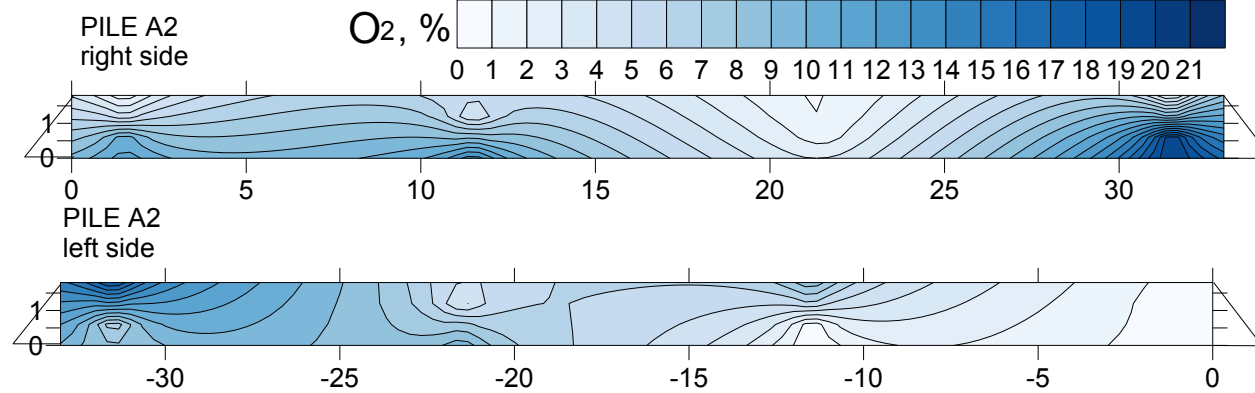

PILE A2  
length 1,5 m

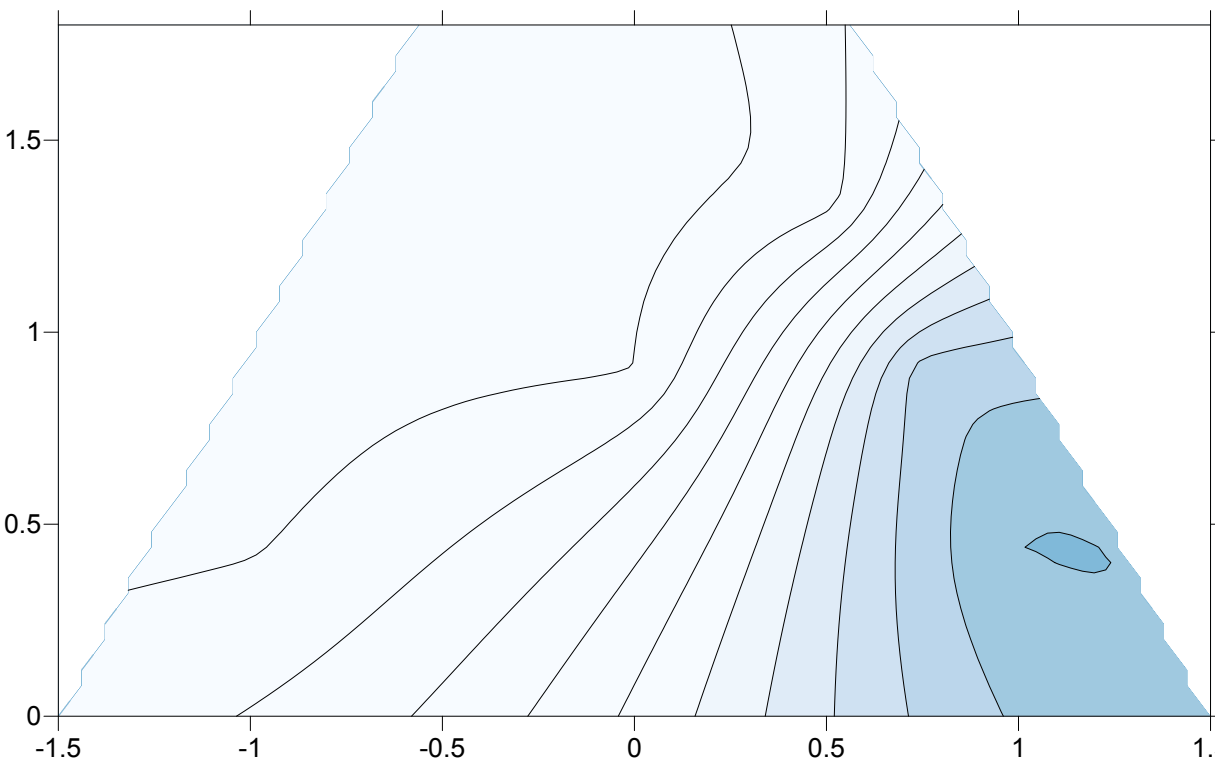

PILE A2  
length 21,5 m

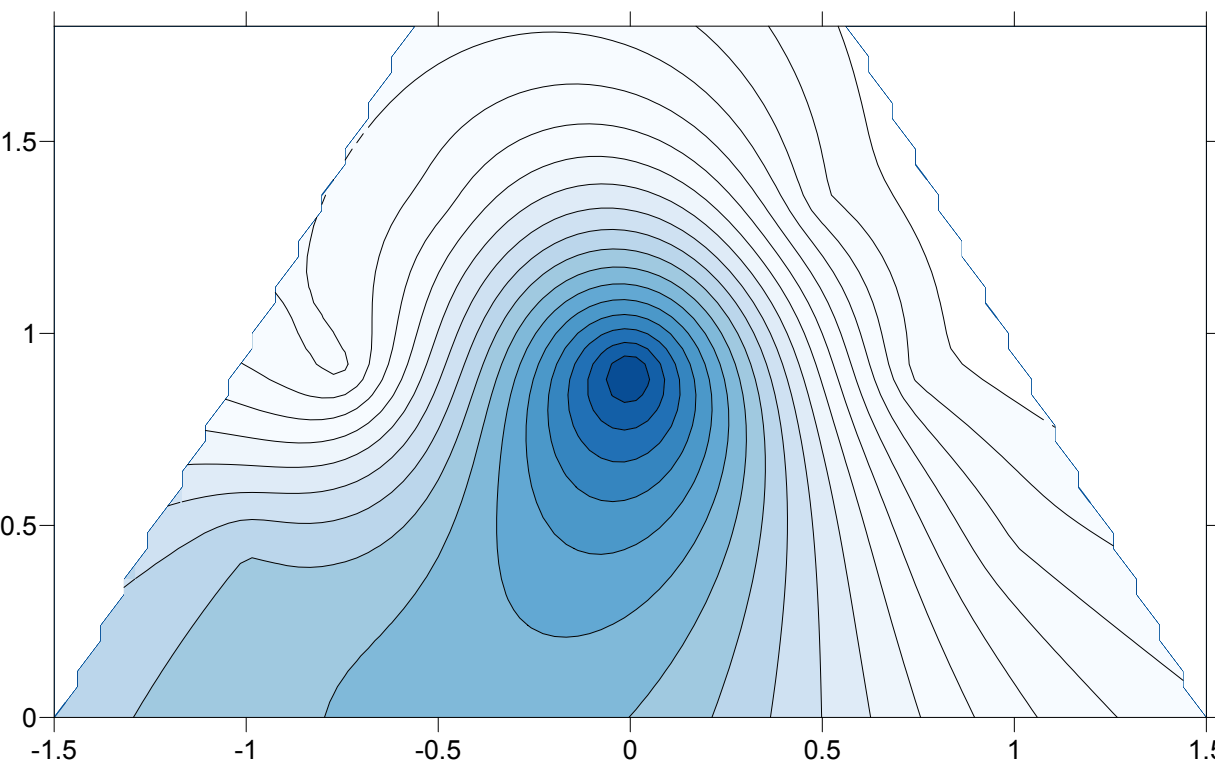

PILE A2  
length 11,5 m

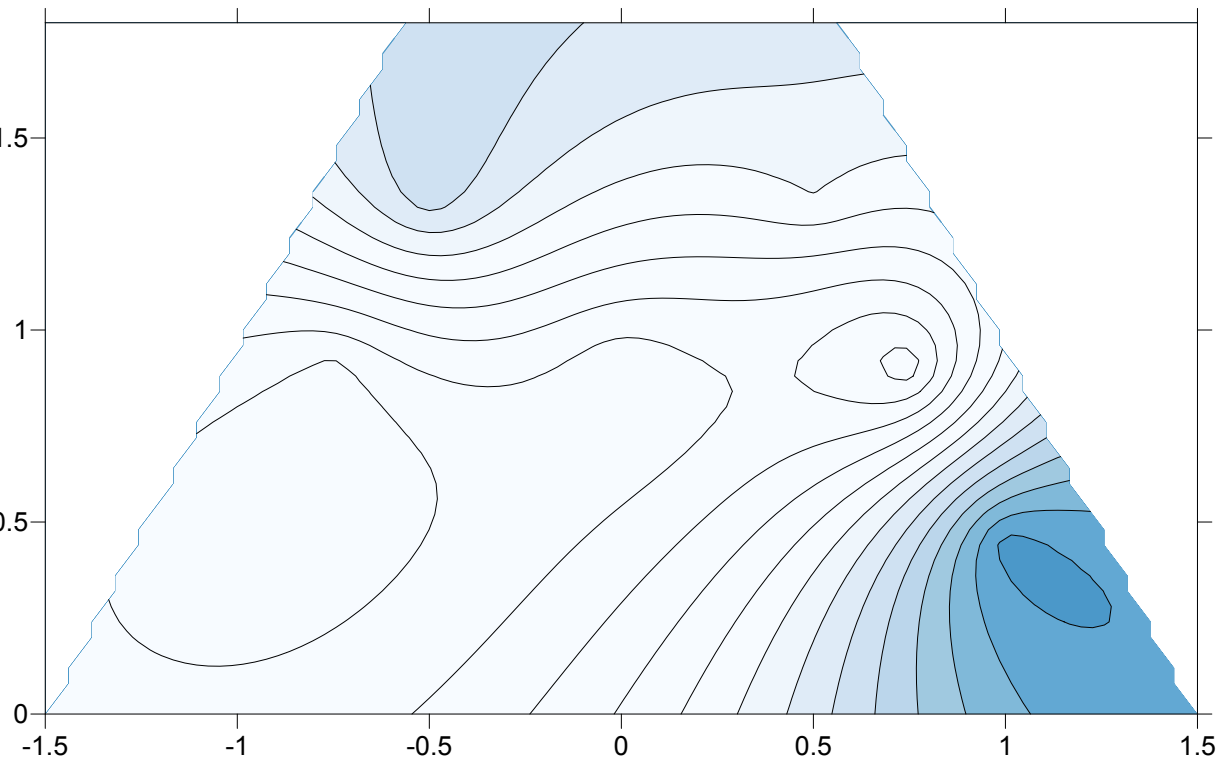

PILE A2  
length 31,5 m

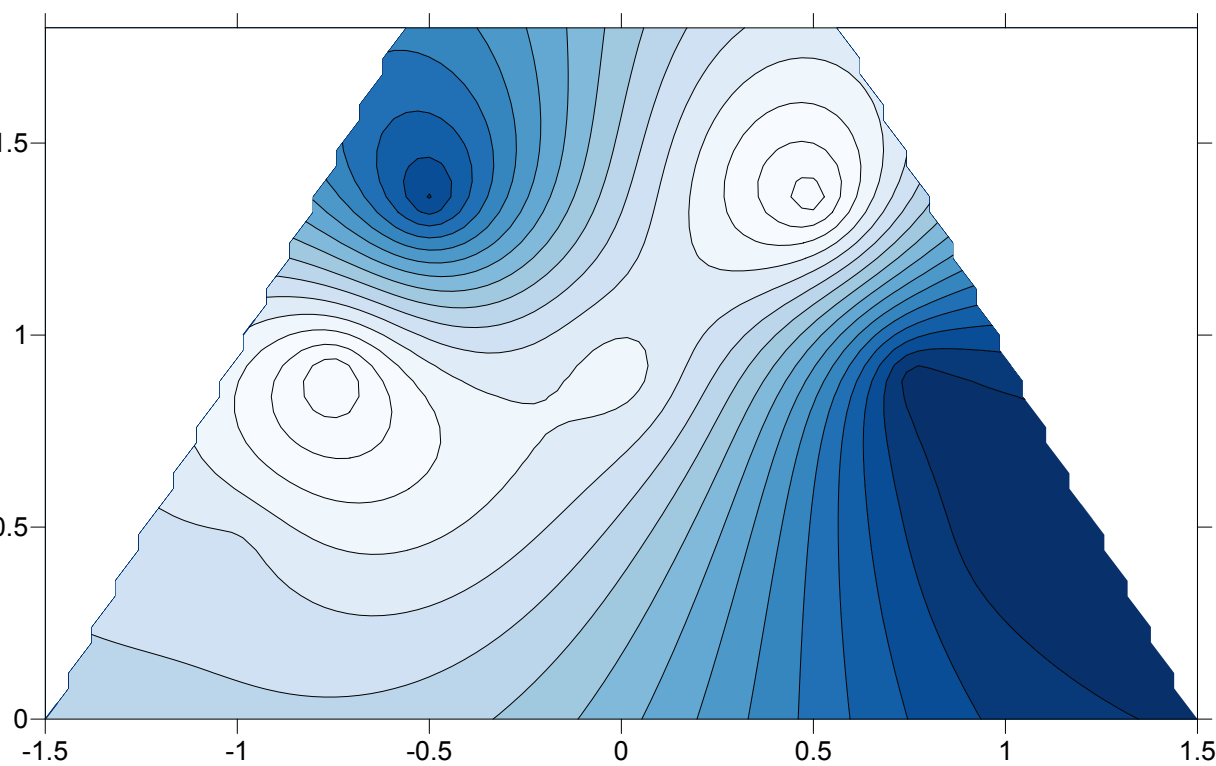

Supplement: s1 [file s1]

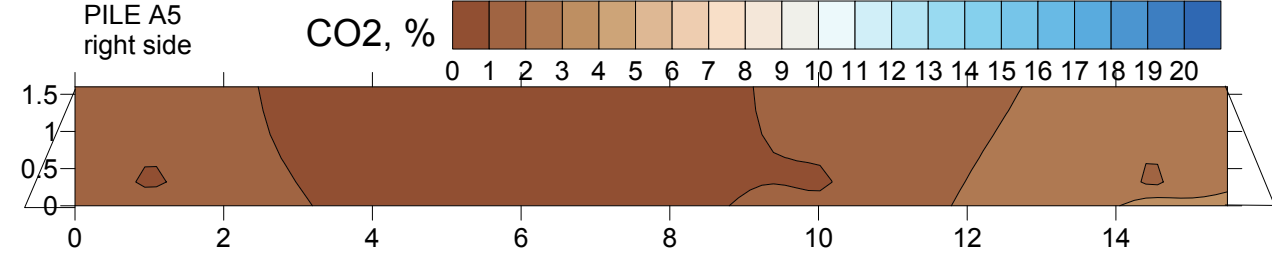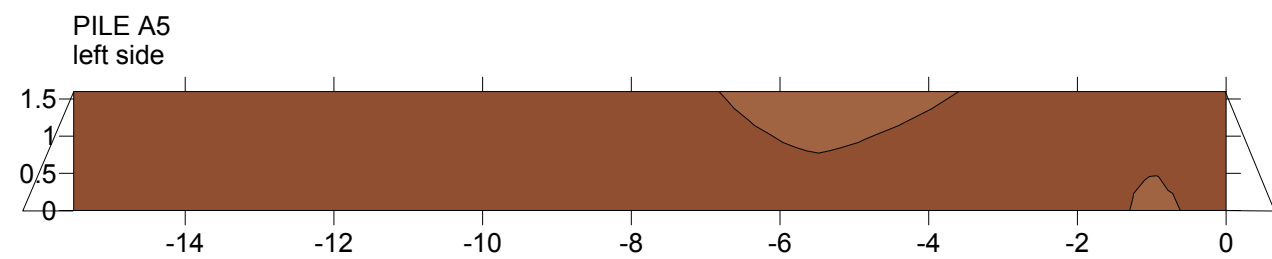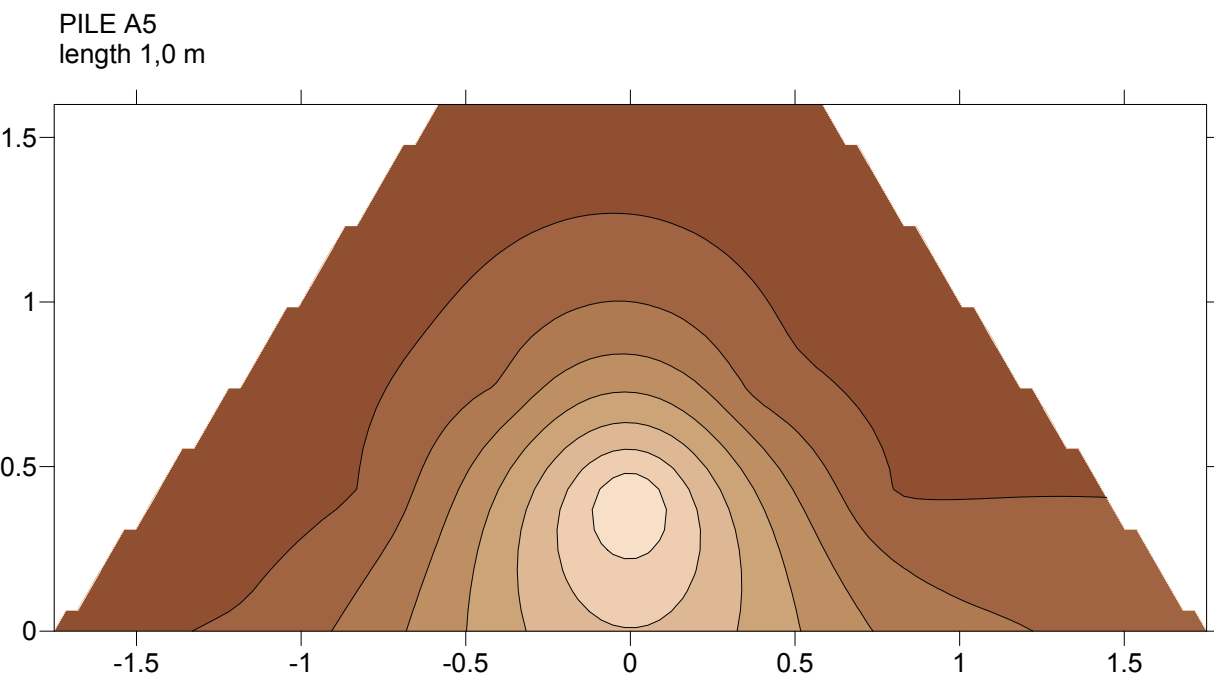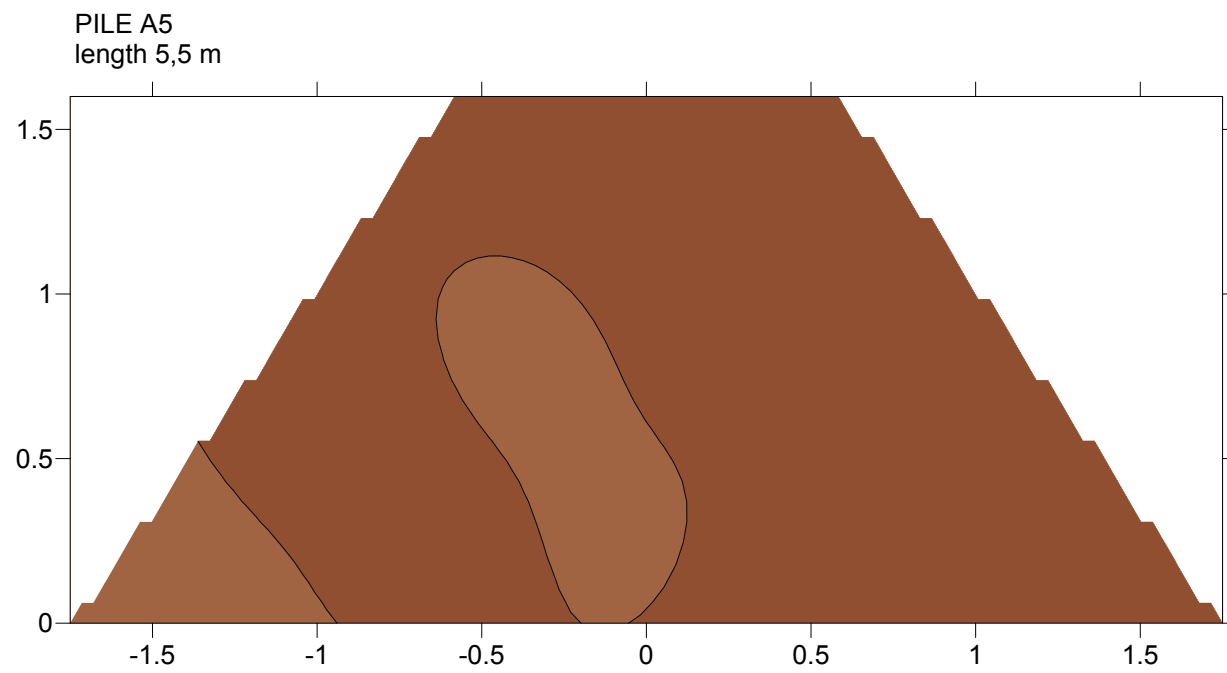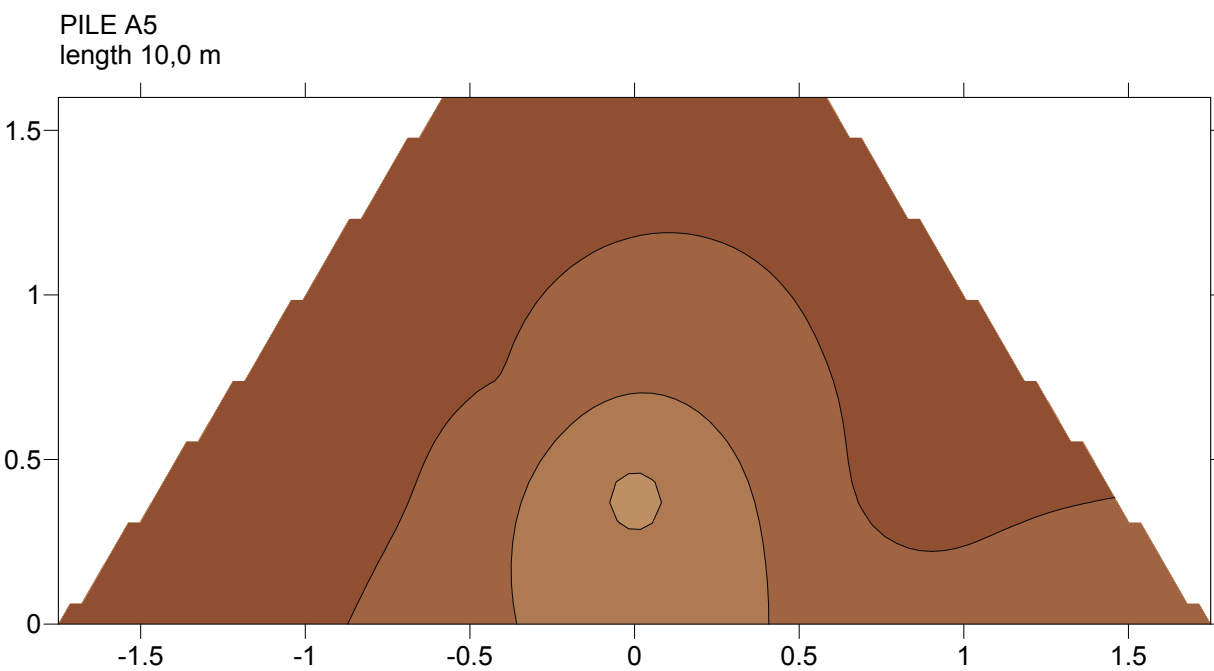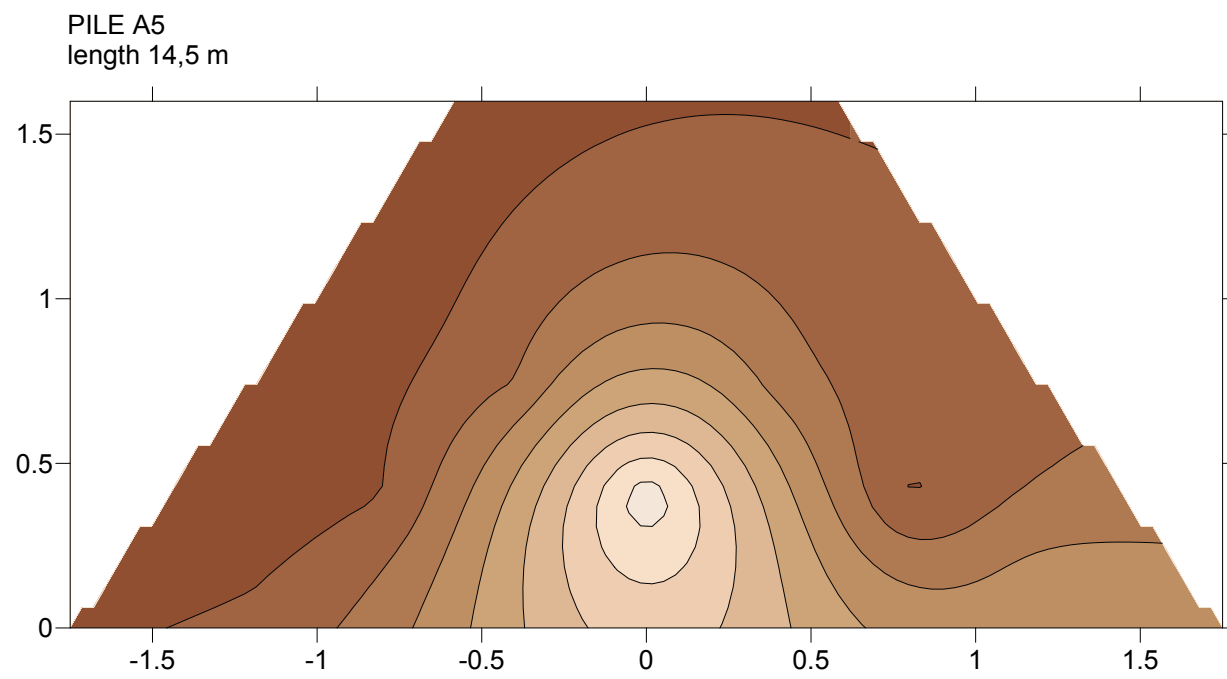

Supplement: s1 [file s1]

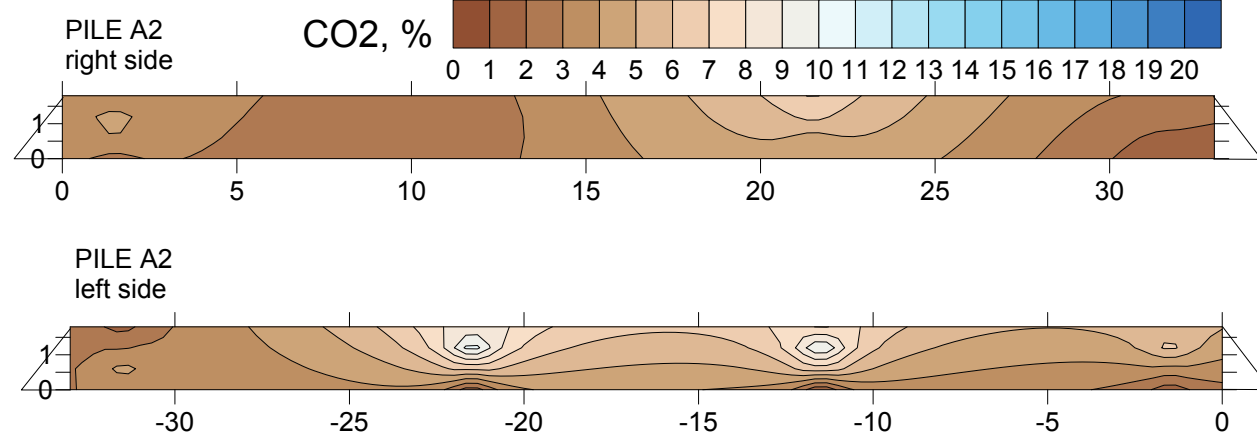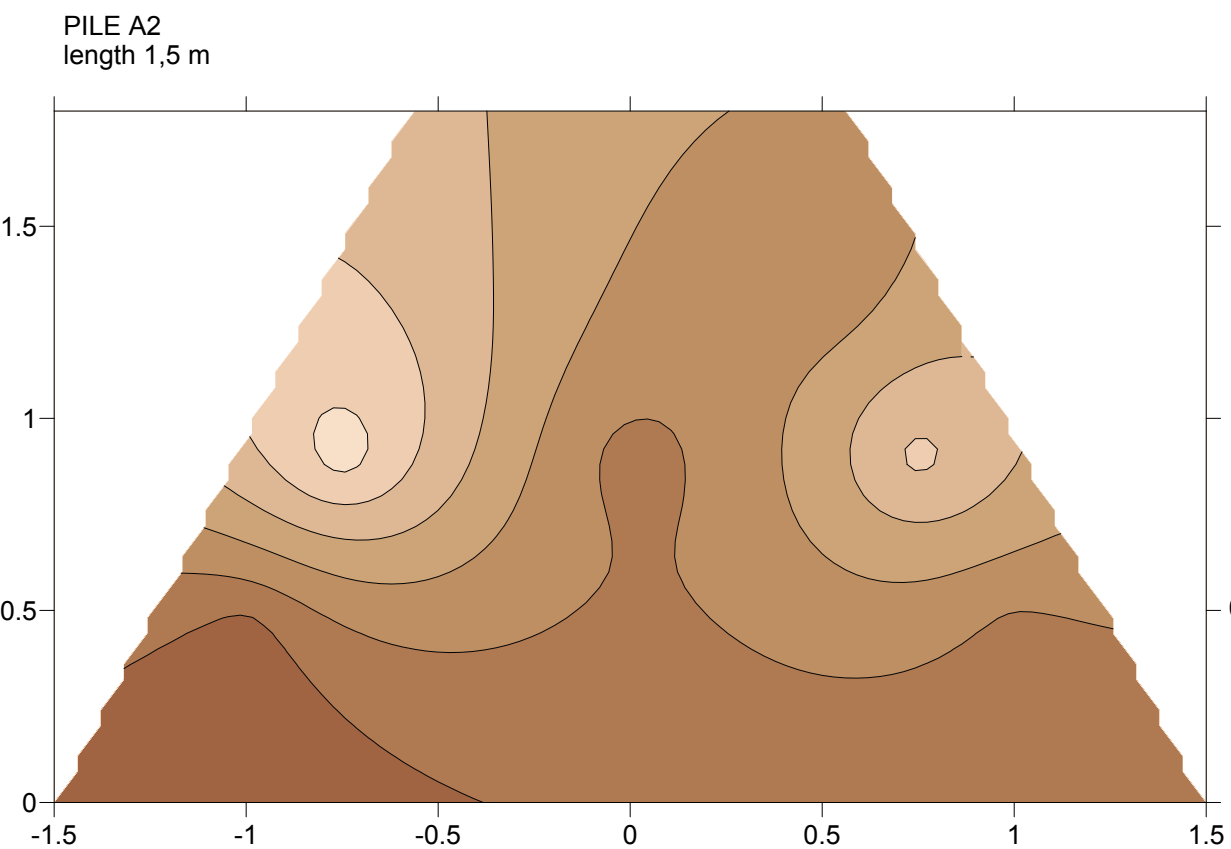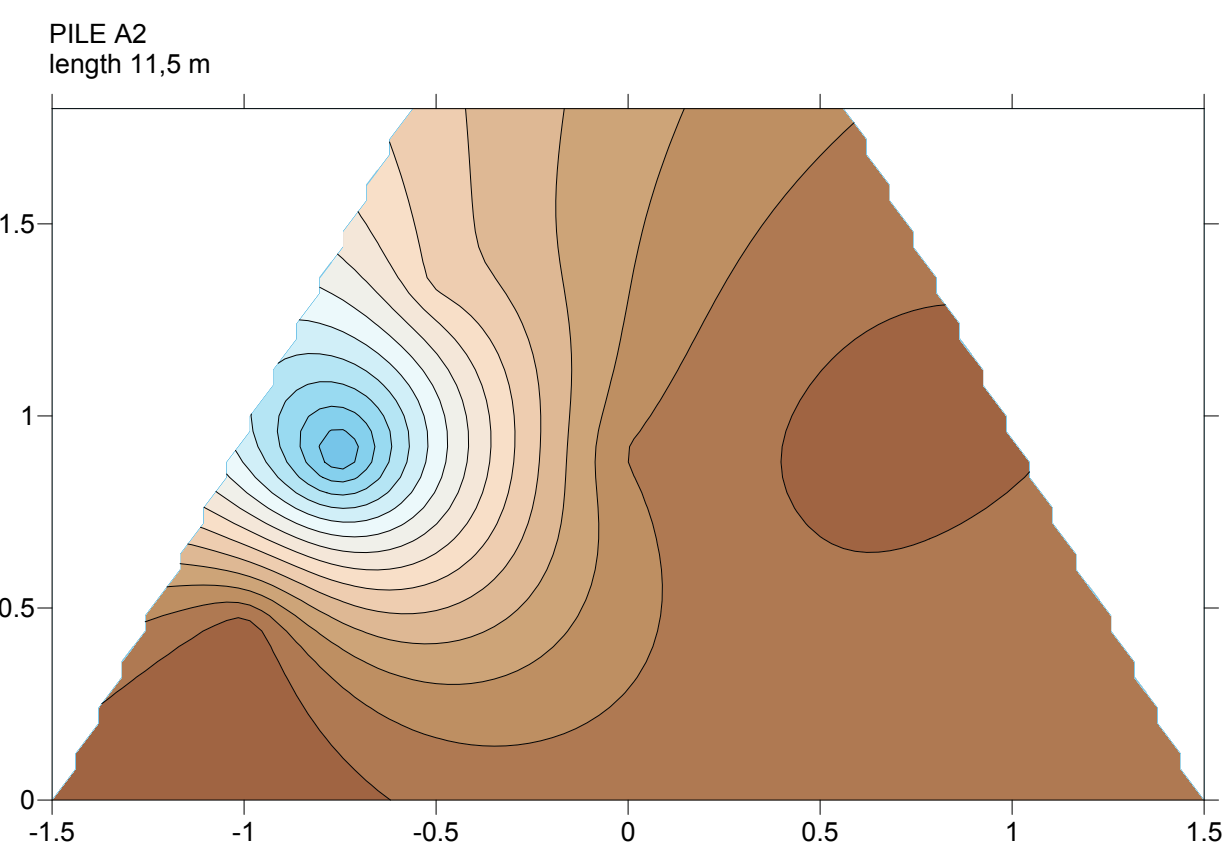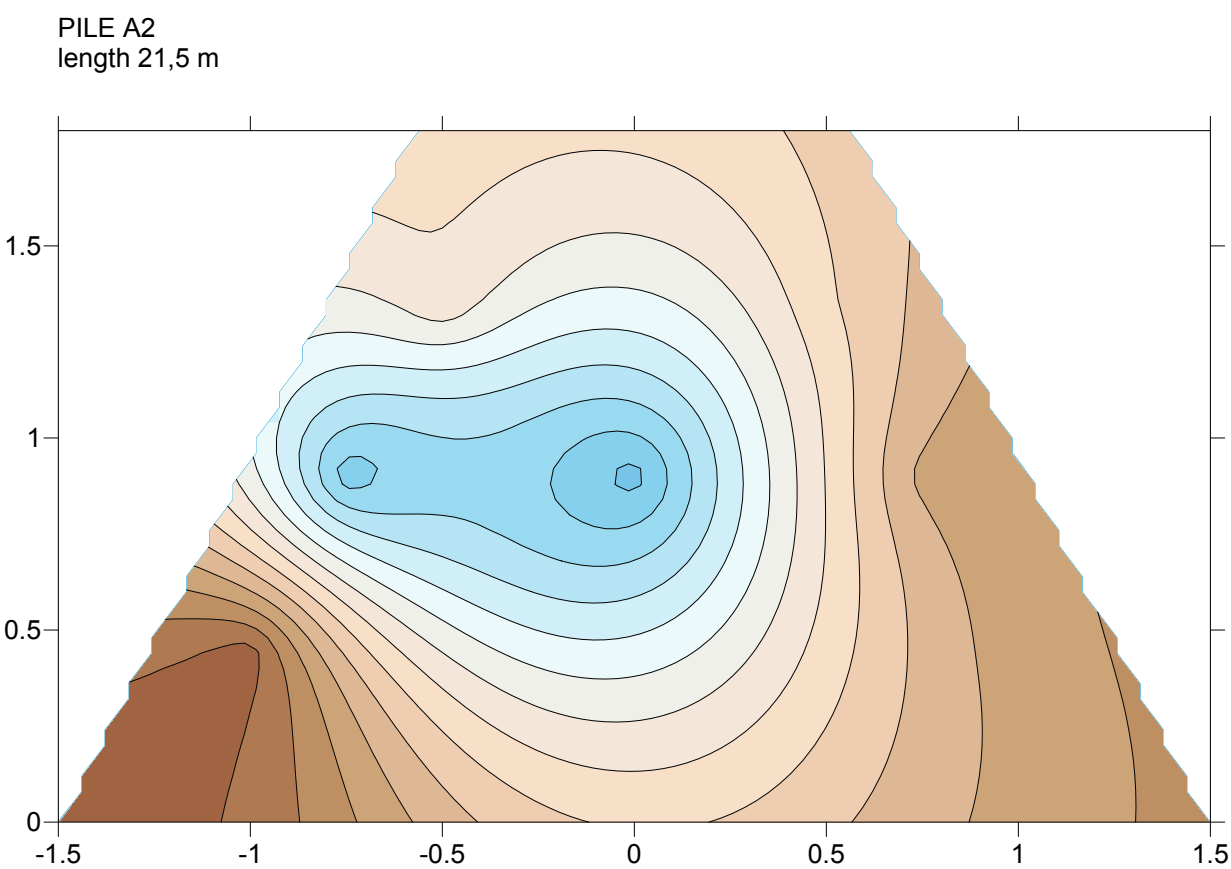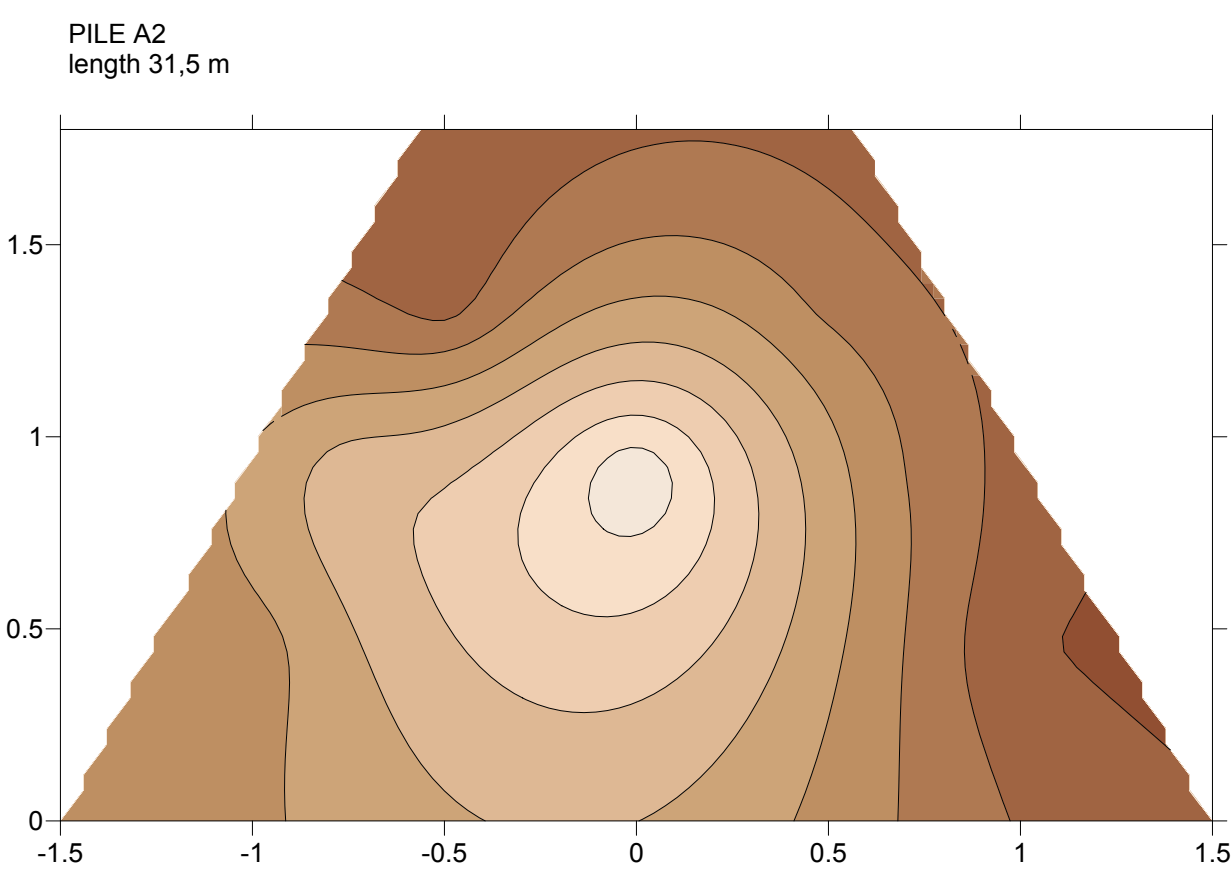

Supplement: s1 [file s1]

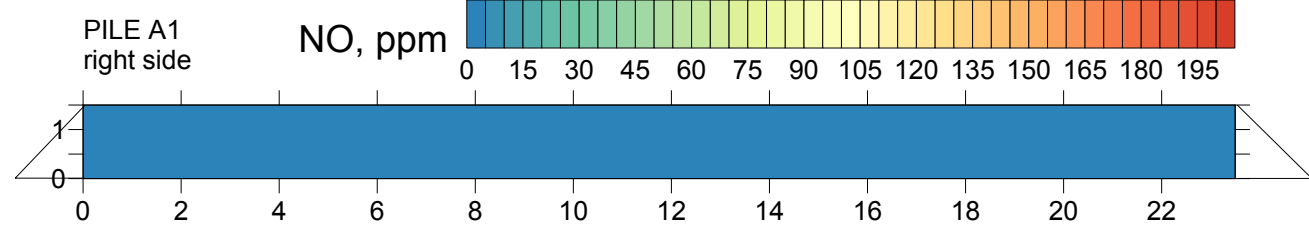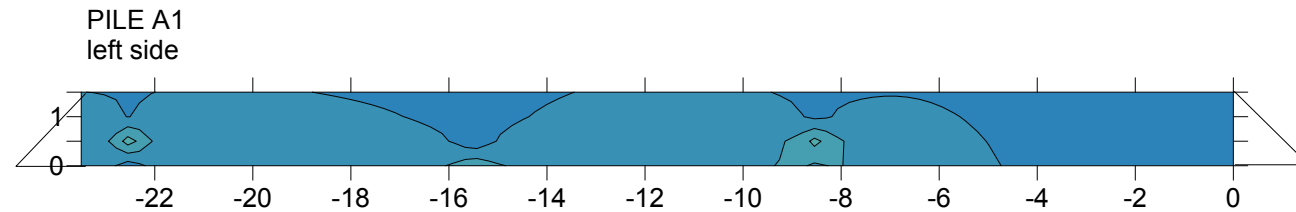

PILE A1  
length 1,5 m

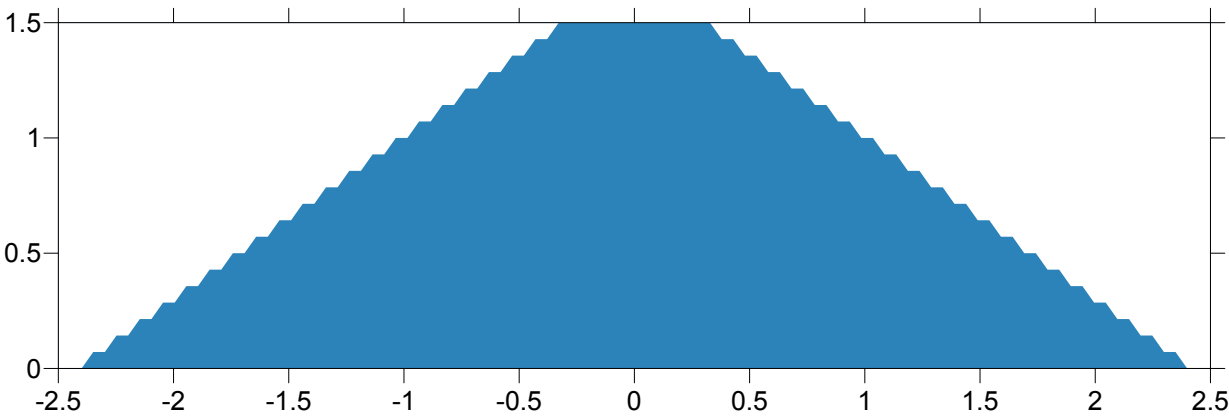

PILE A1  
length 8,5 m

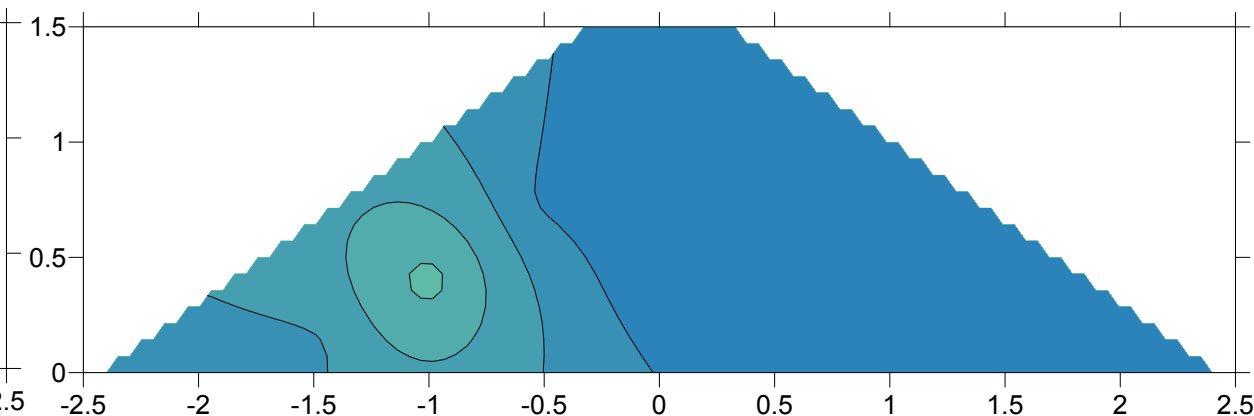

PILE A1  
length 15,5 m

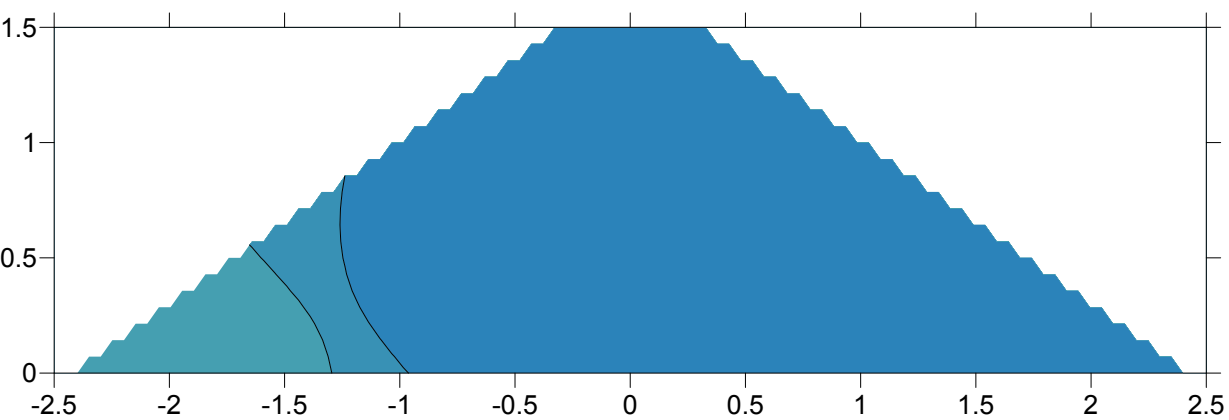

PILE A1  
length 22,5 m

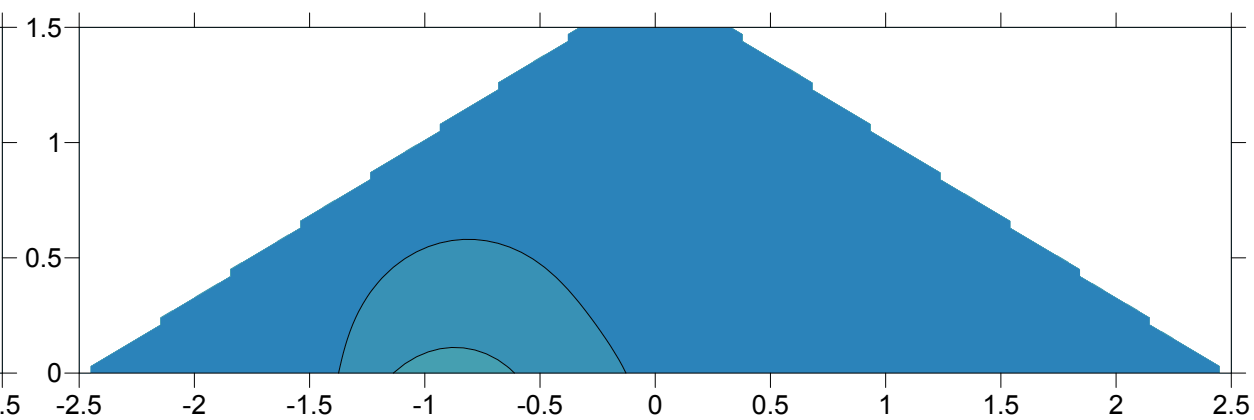

Supplement: s1 [file s1]

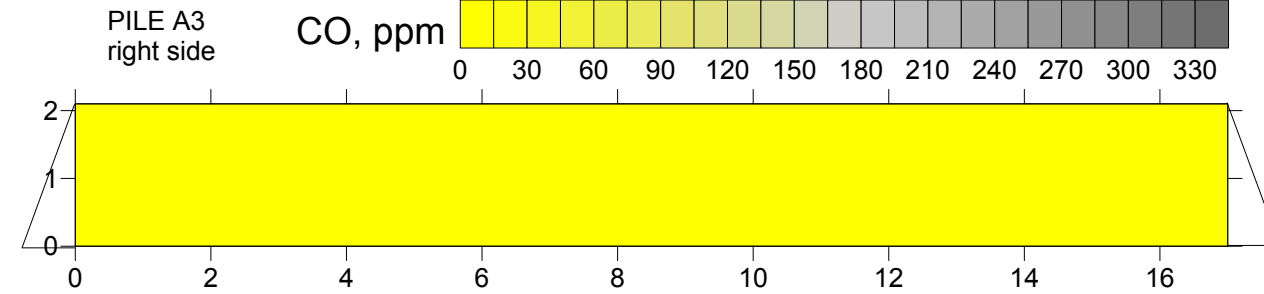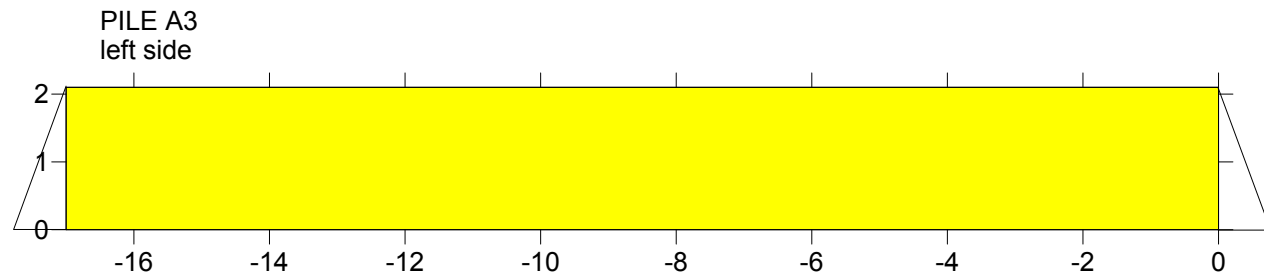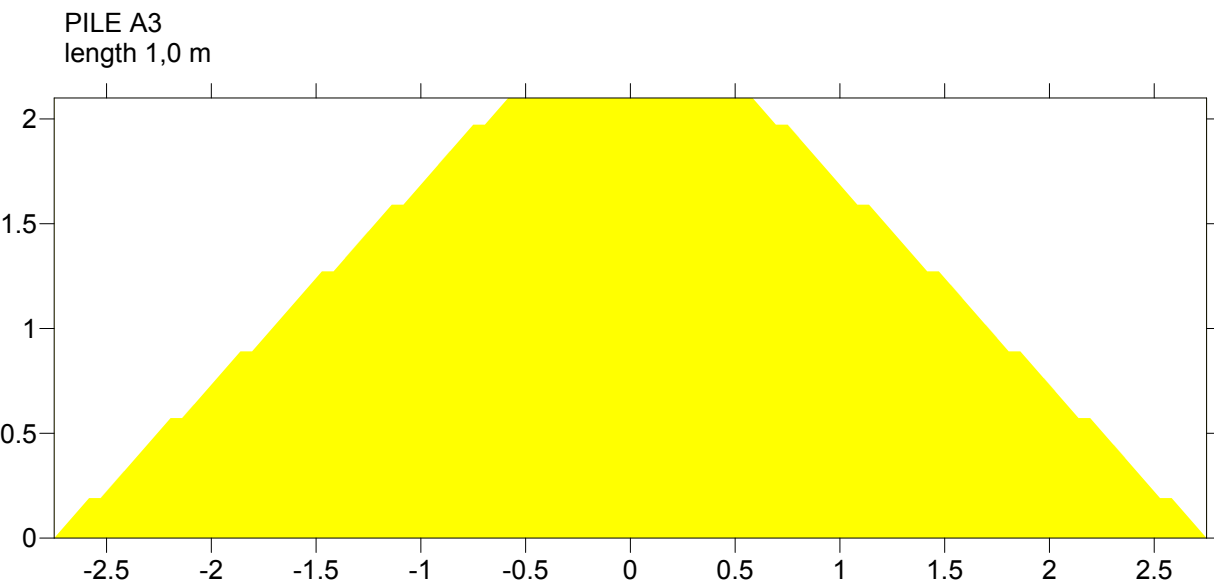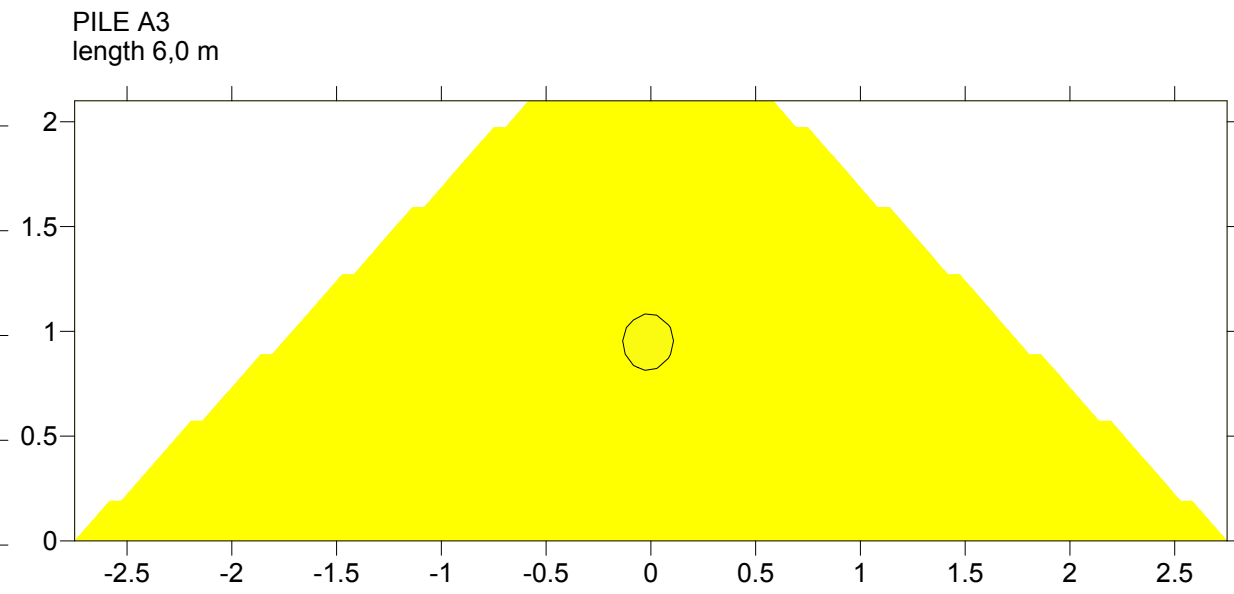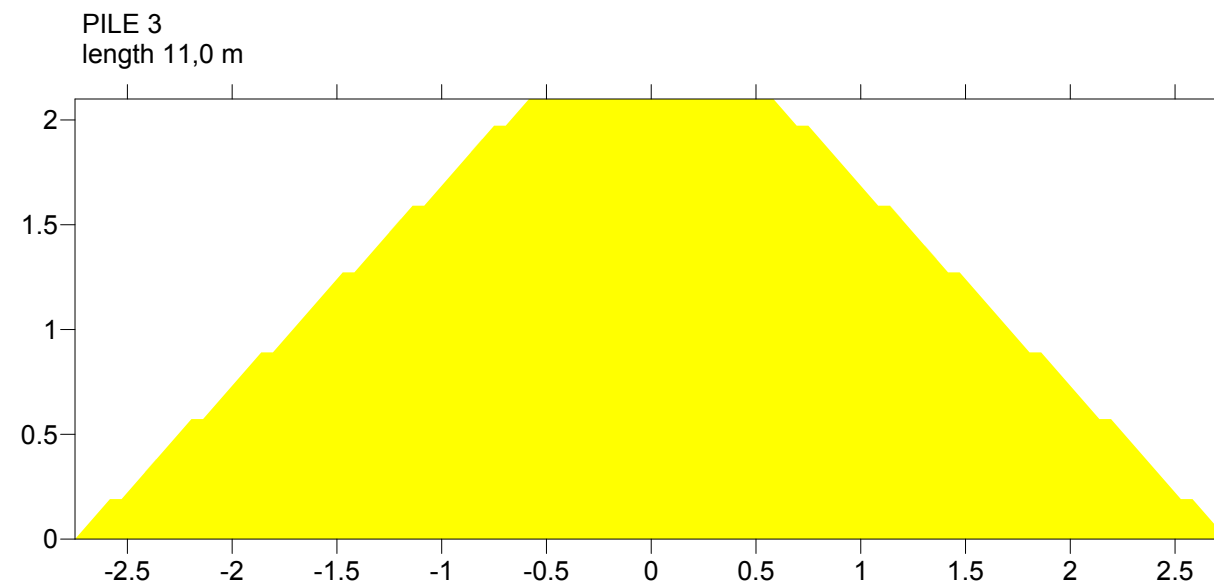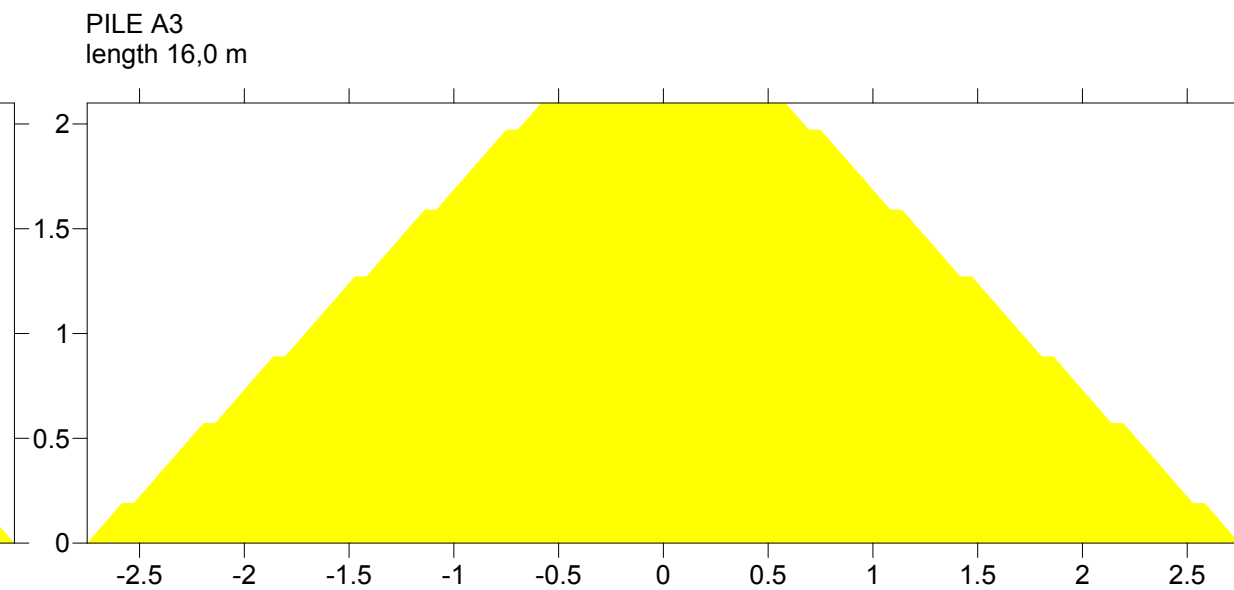

Supplement: s1 [file s1]

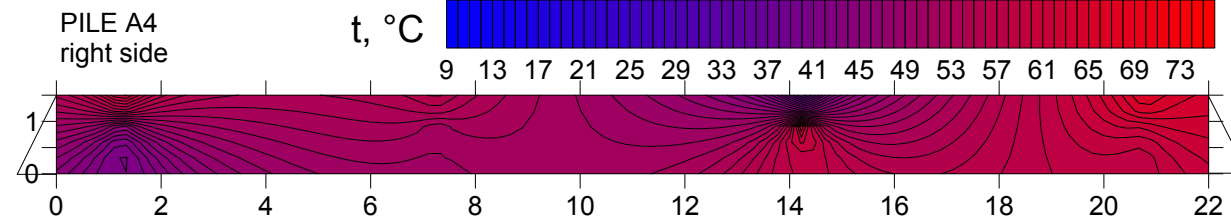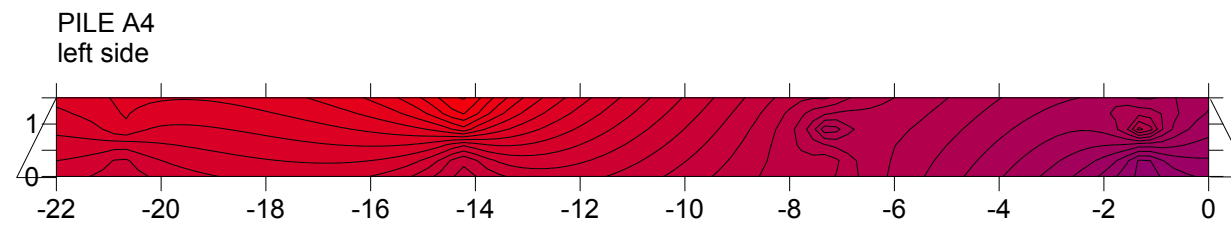

PILE A4  
length 1,25 m

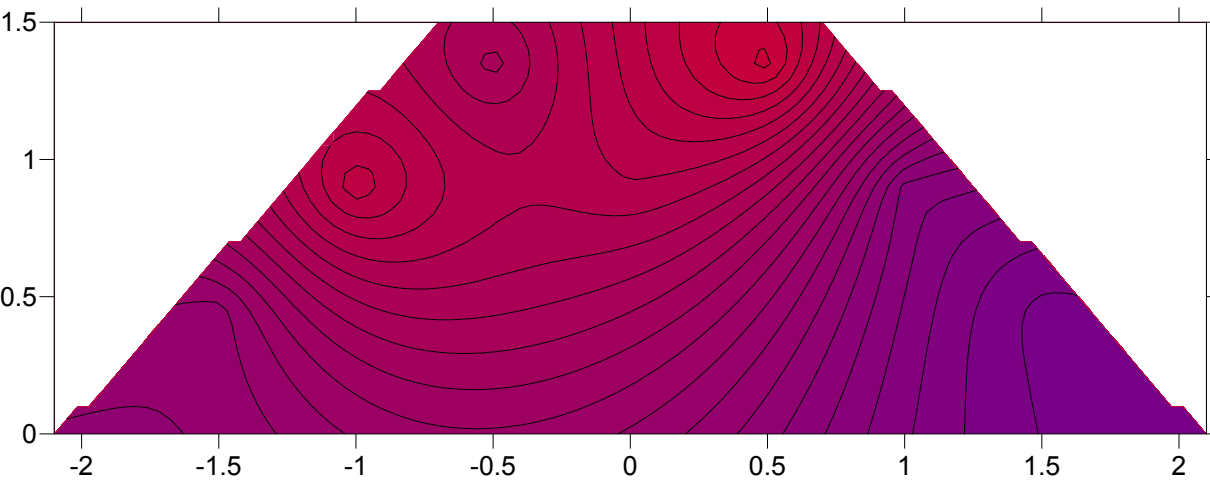

PILE A4  
length 7,25 m

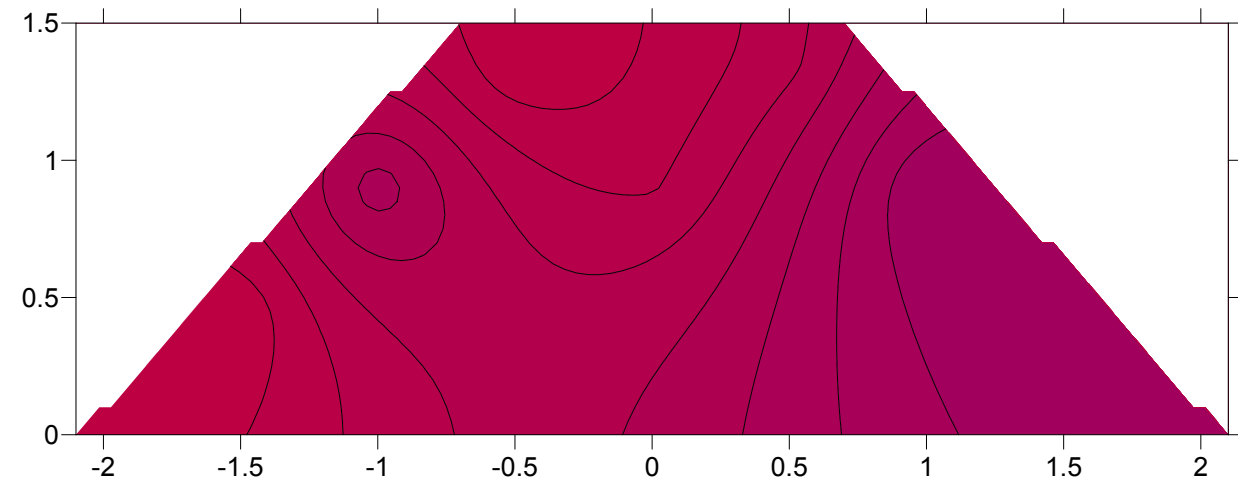

PILE A4  
length 14,25 m

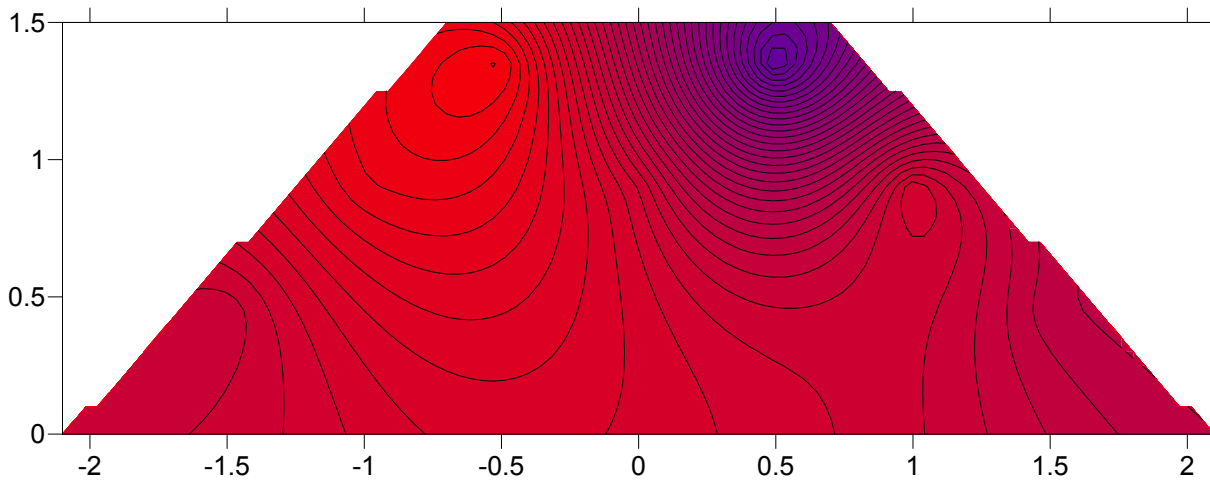

PILE A4  
length 14,25 m

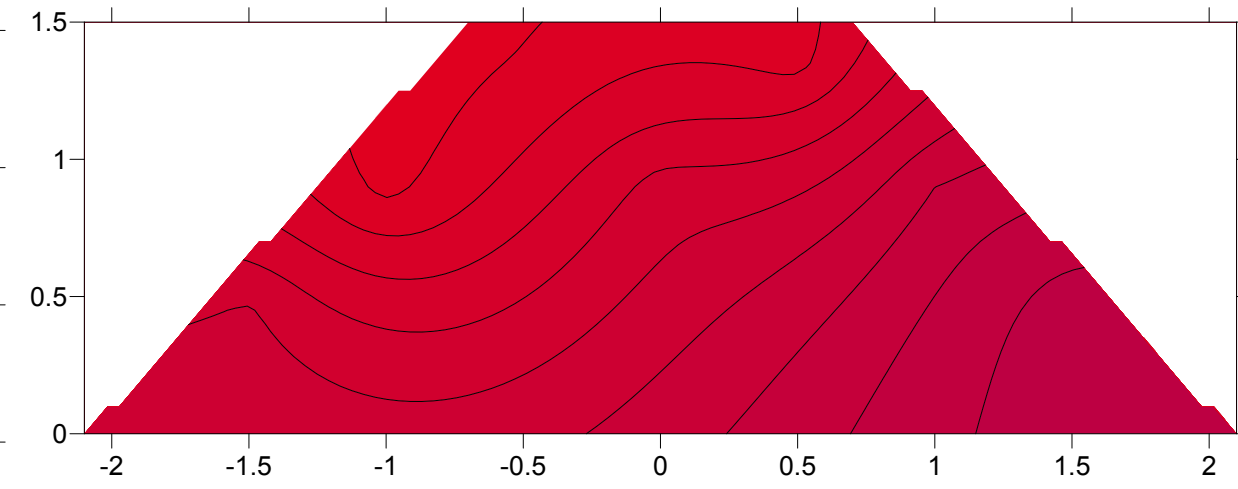

Supplement: s1 [file s1]

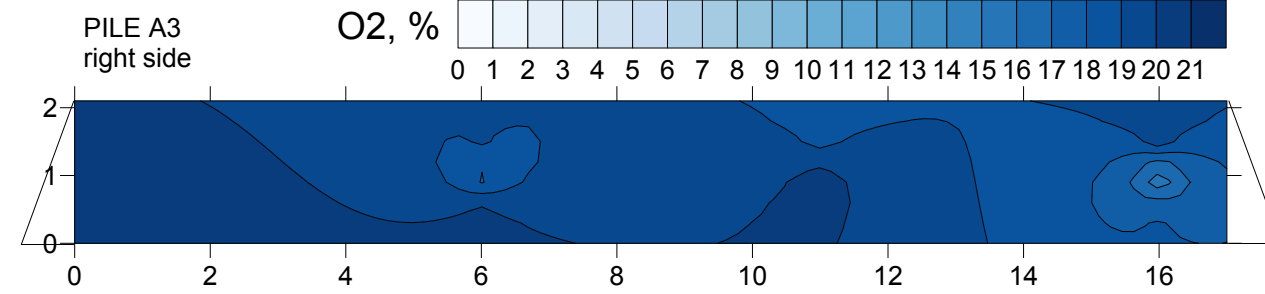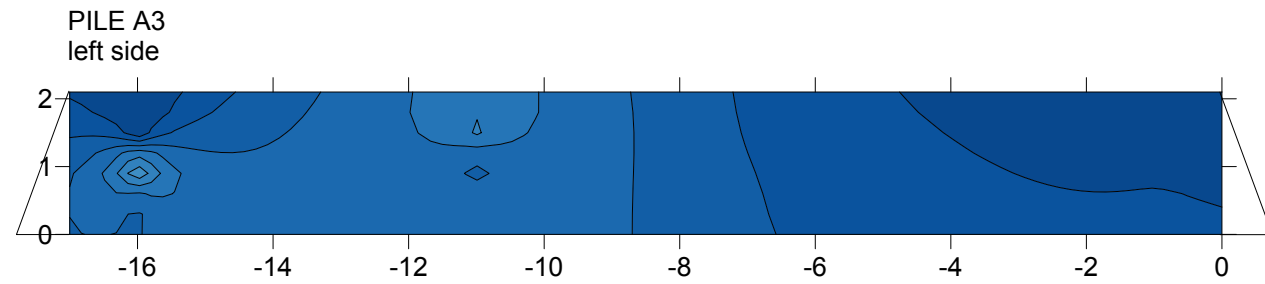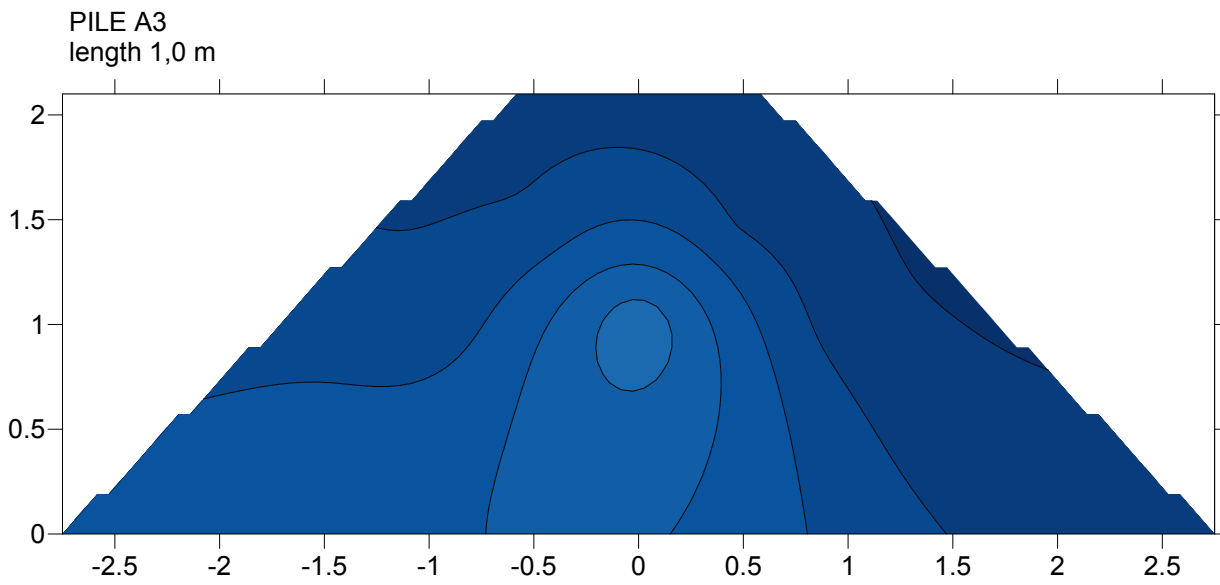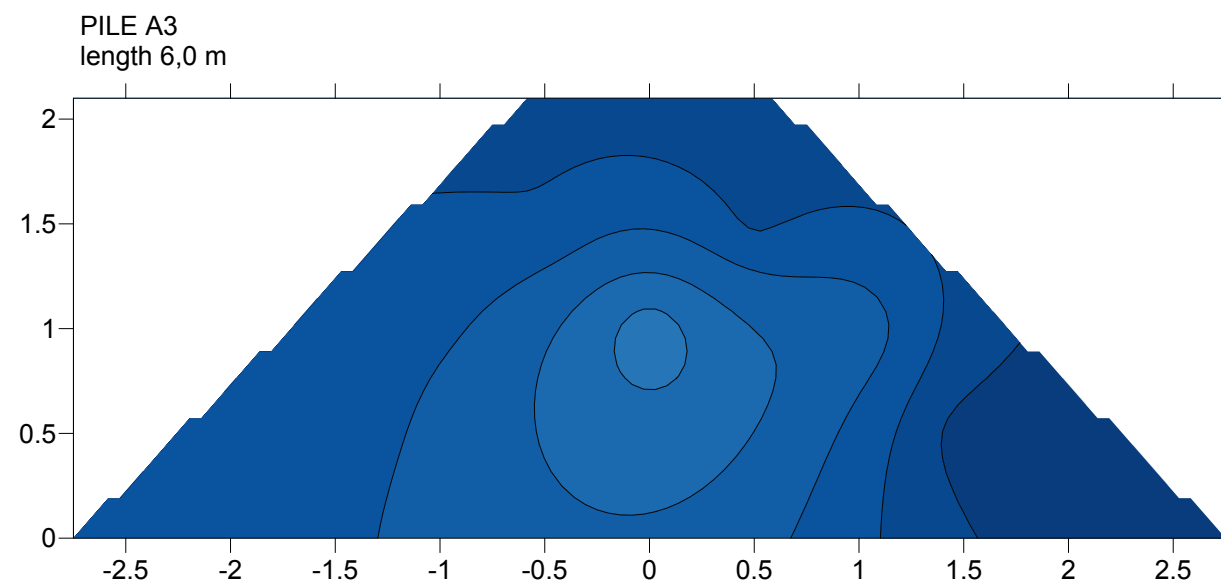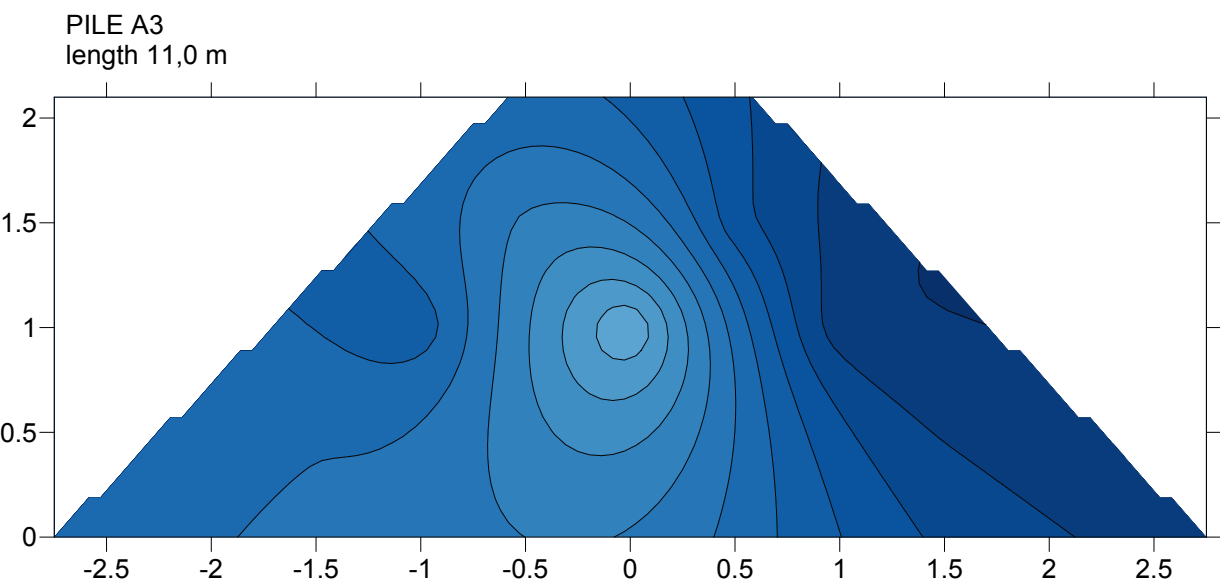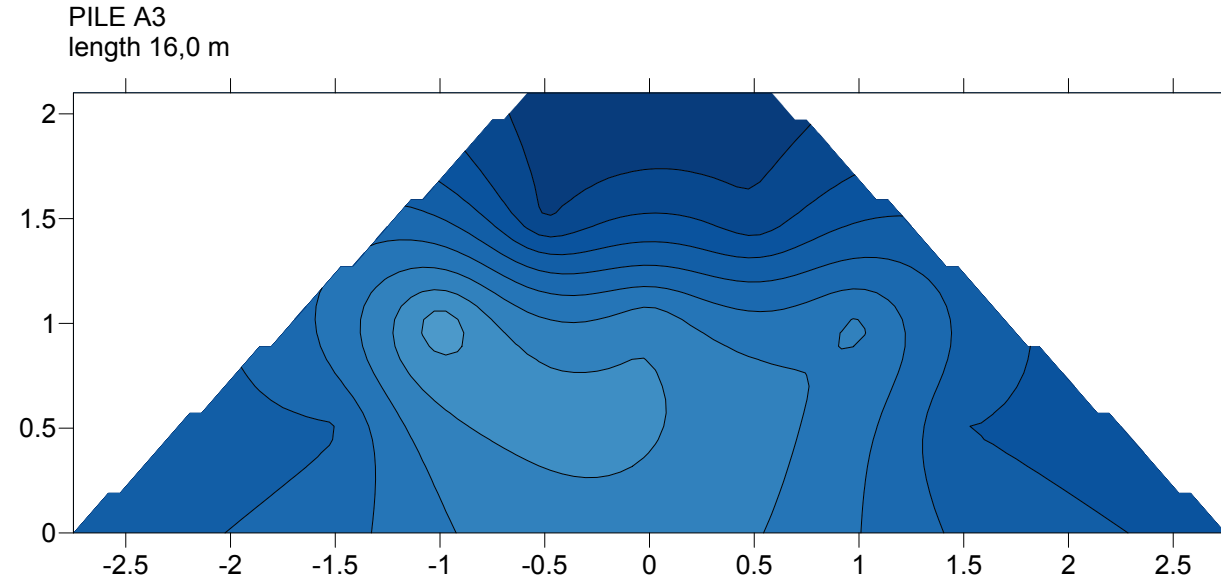

Supplement: s1 [file s1]

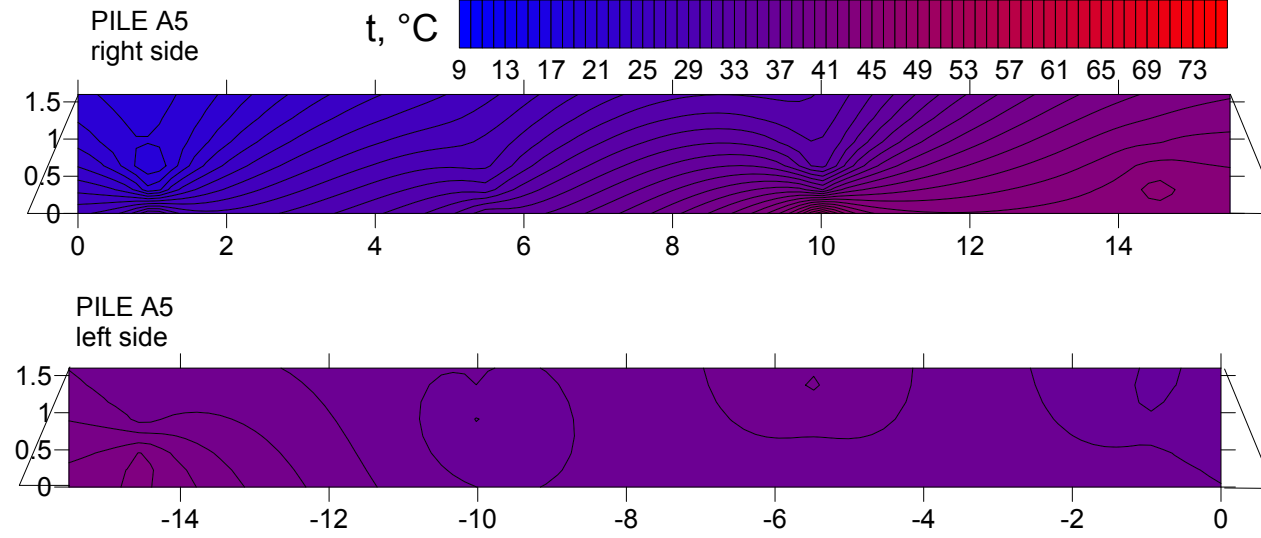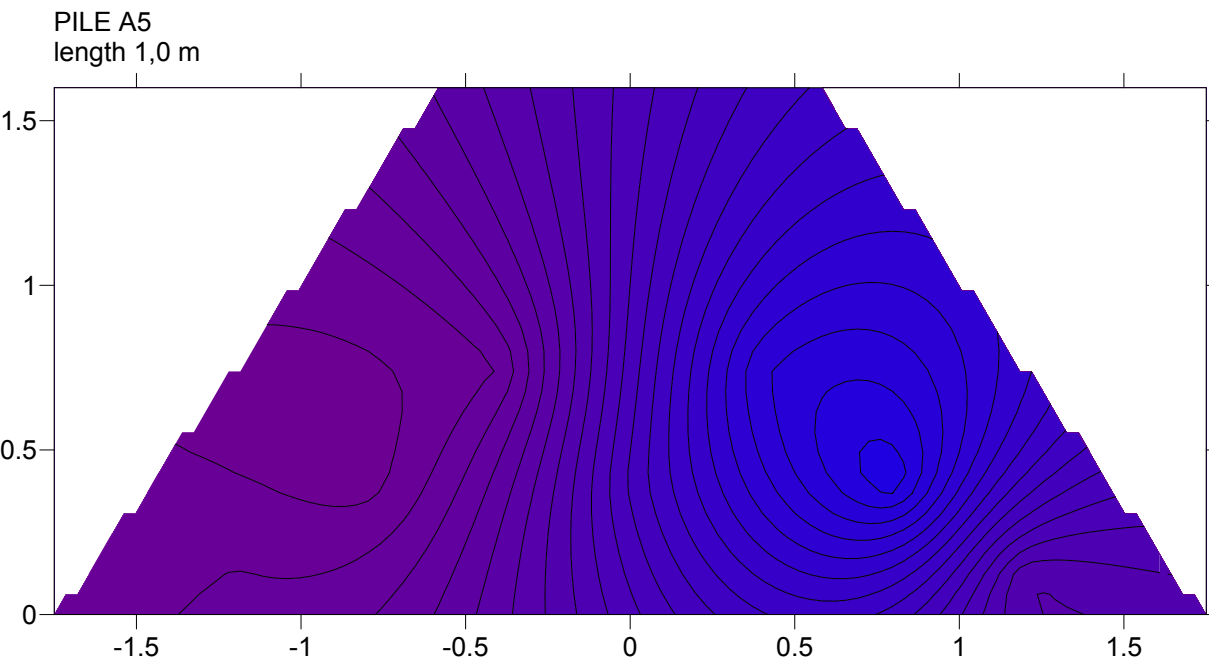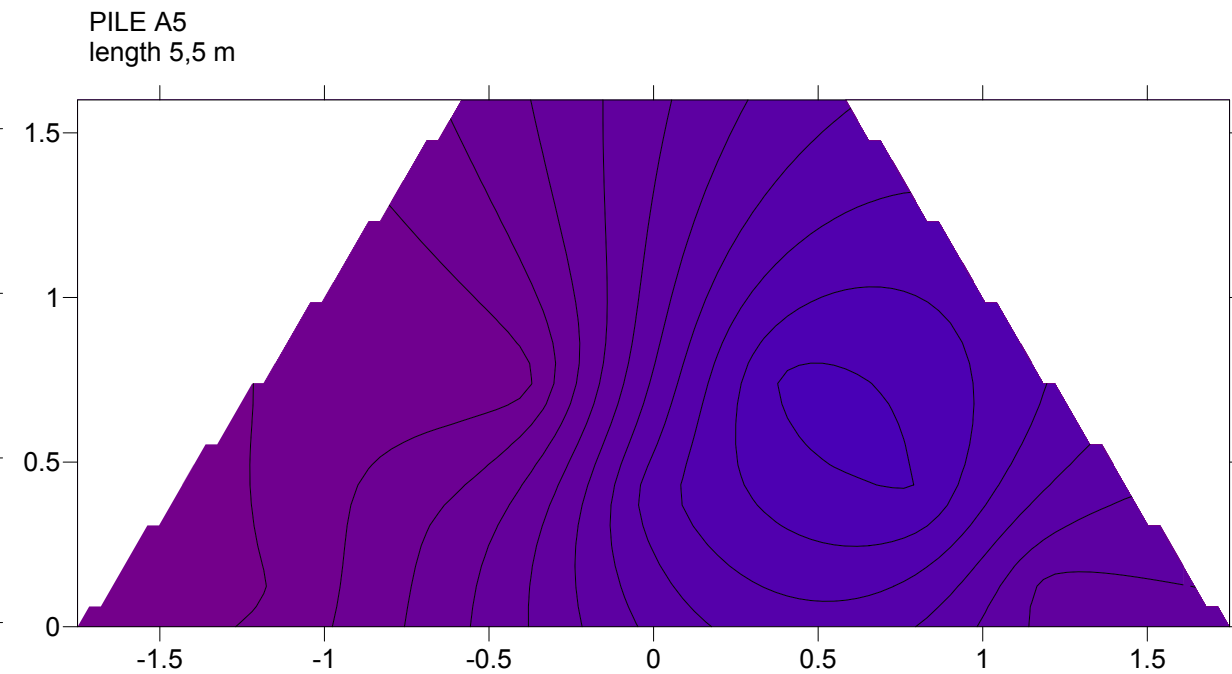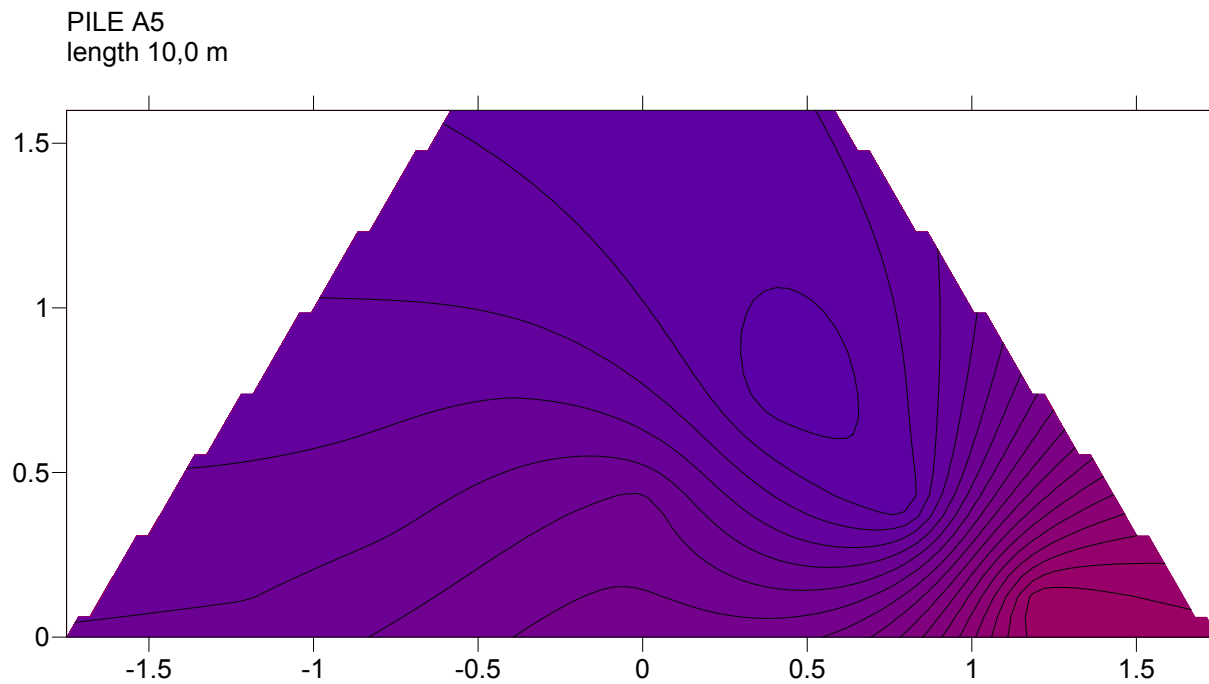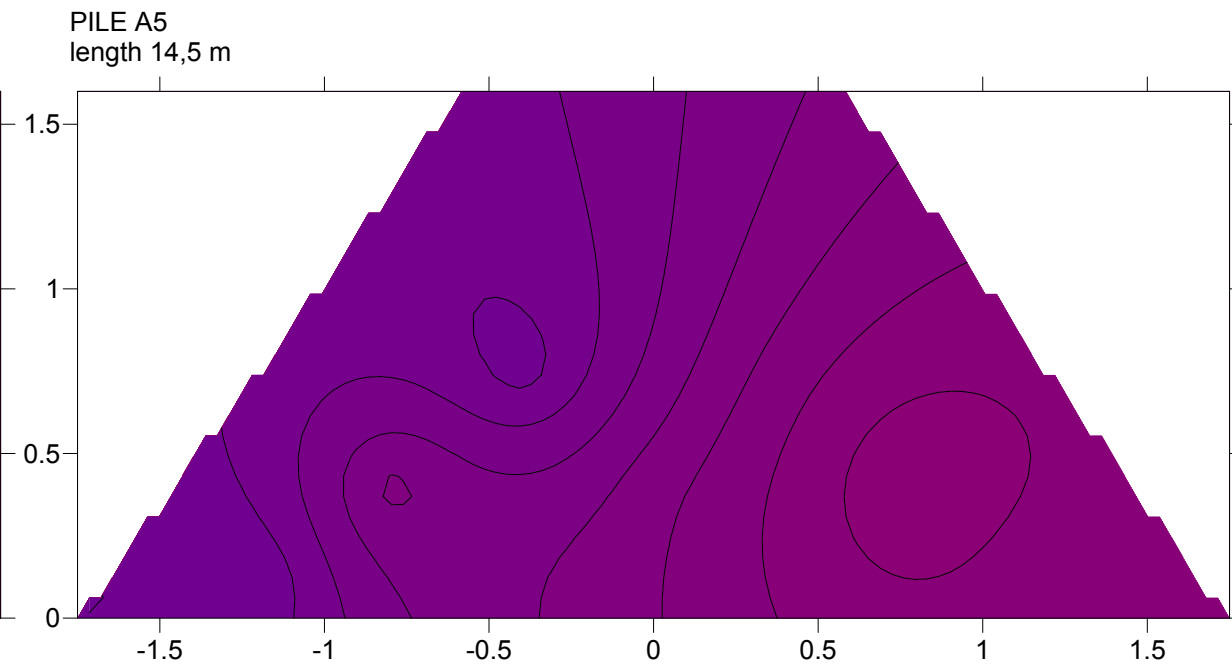

Supplement: s1 [file s1]

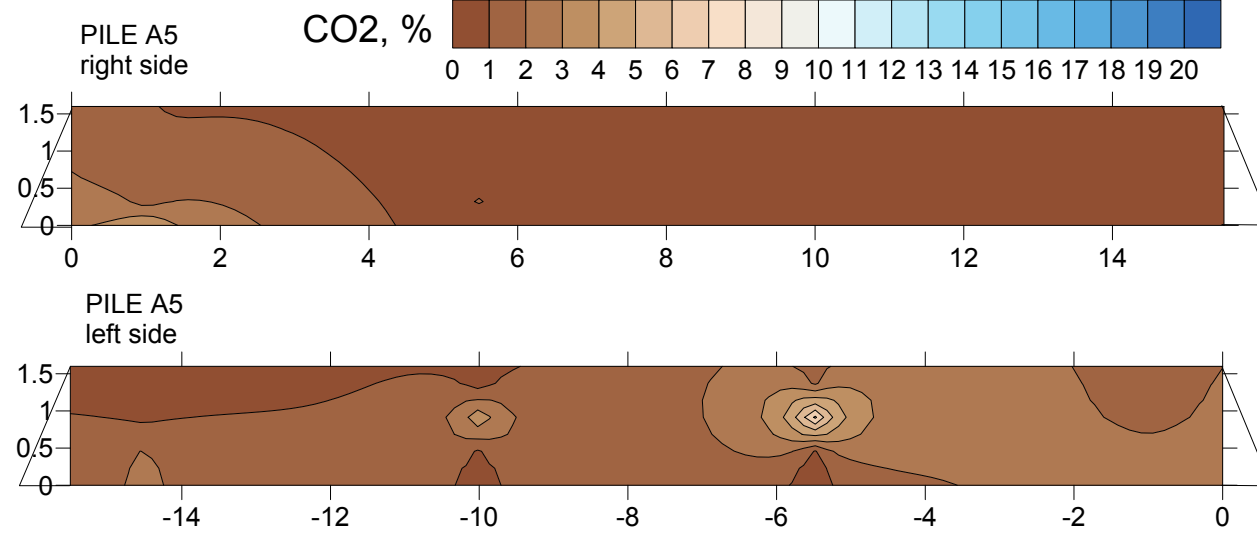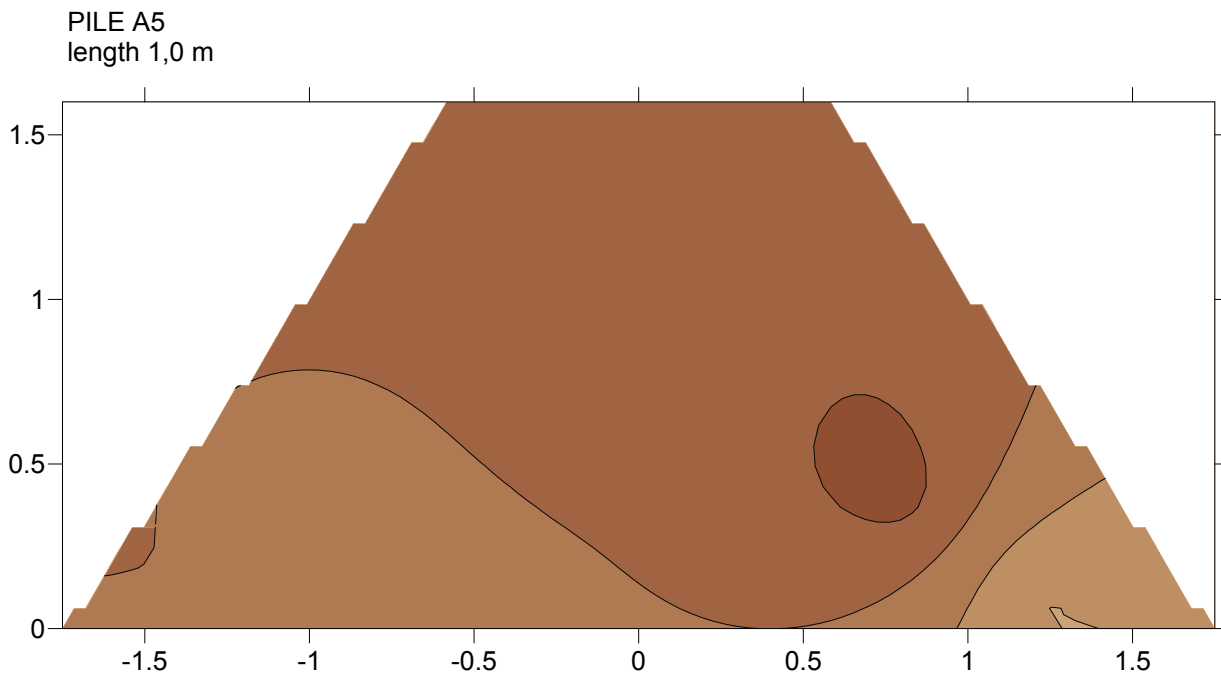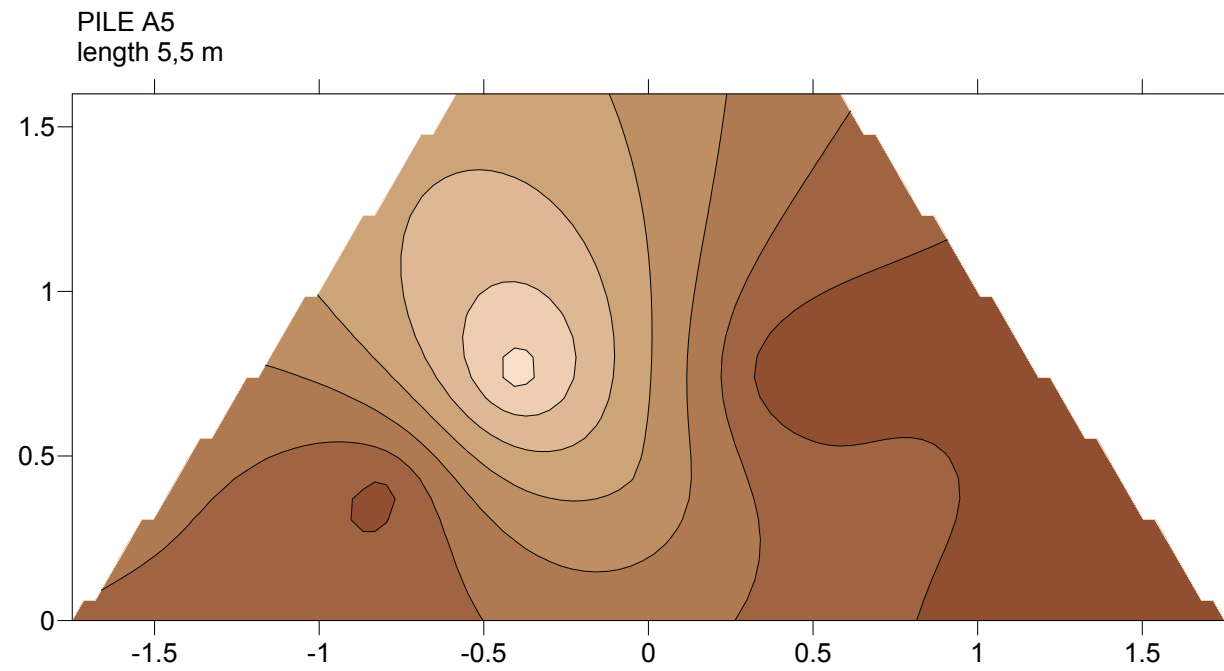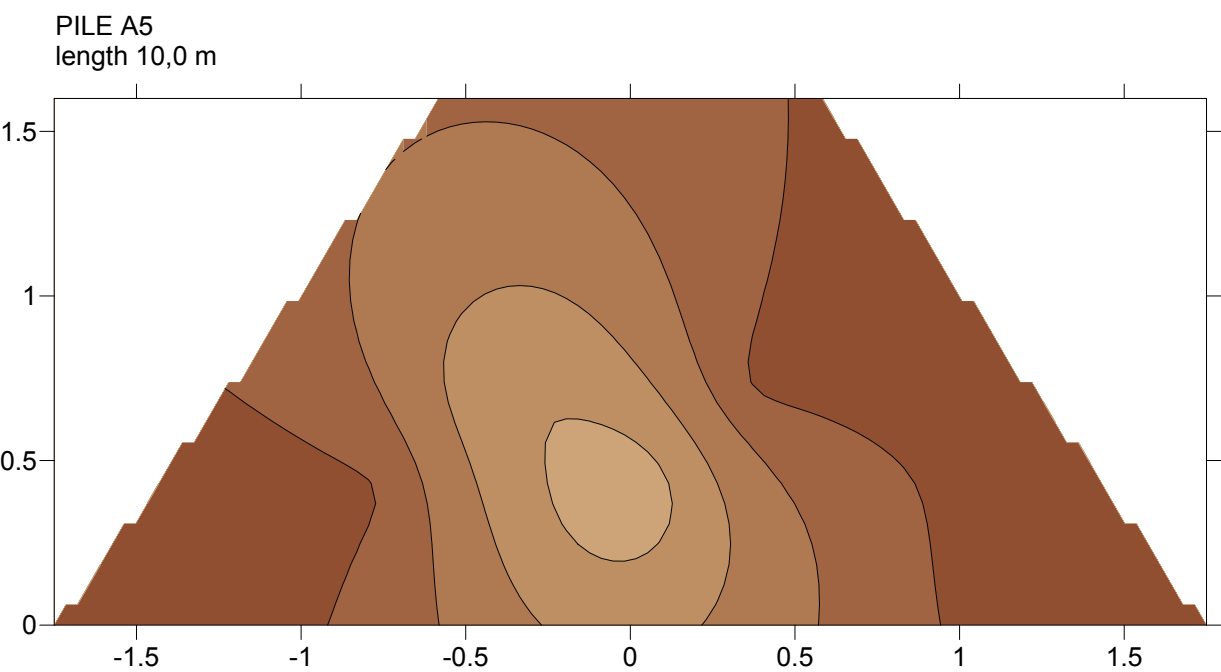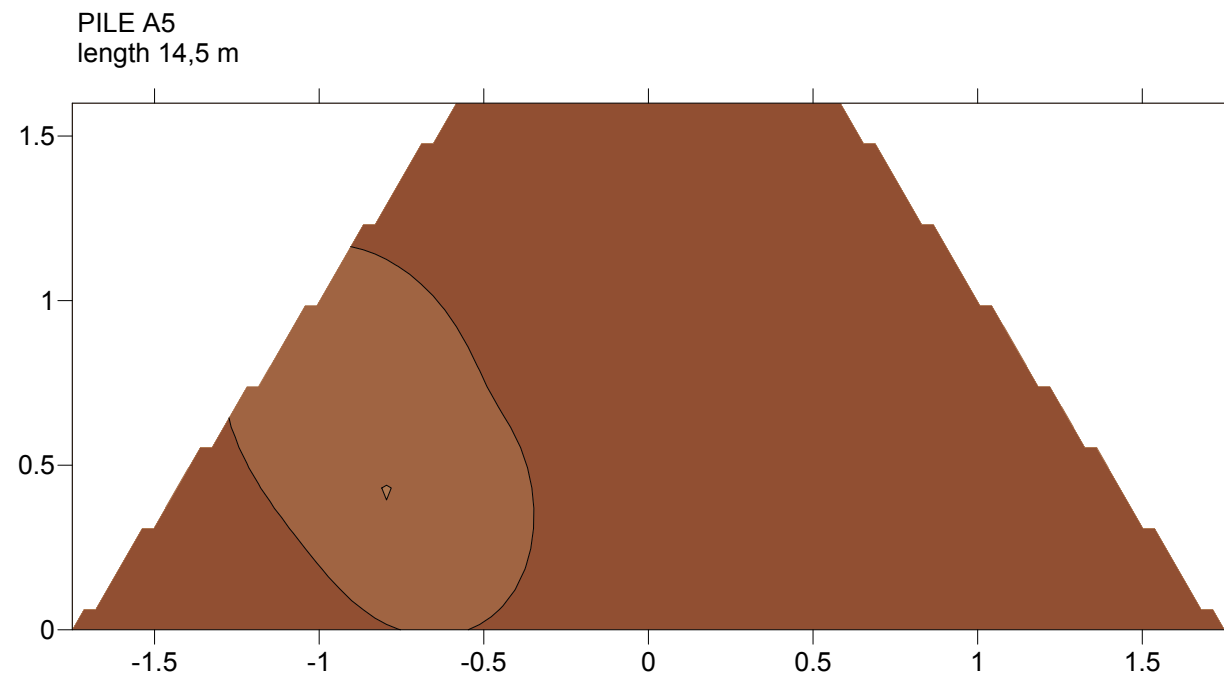

Supplement: s1 [file s1]

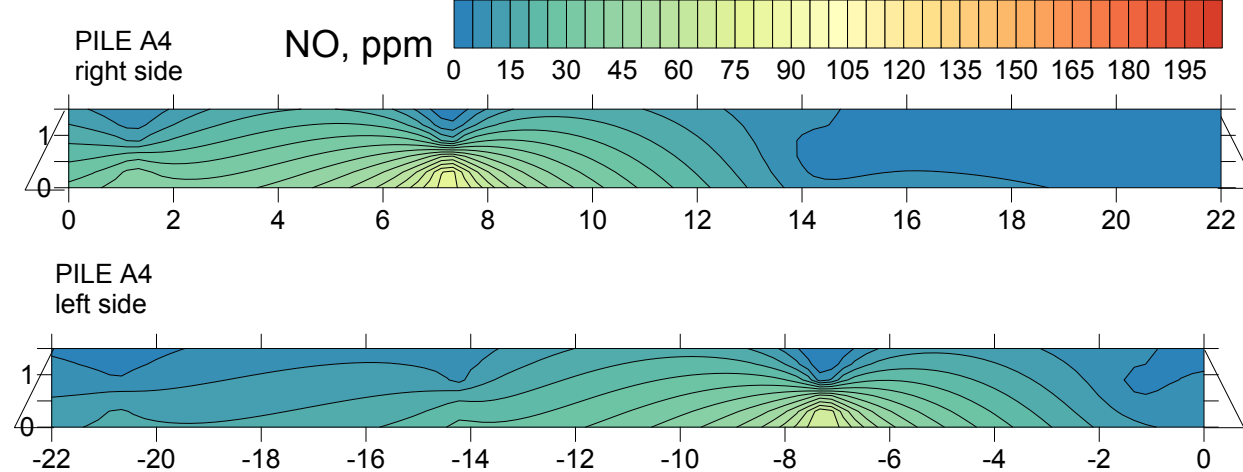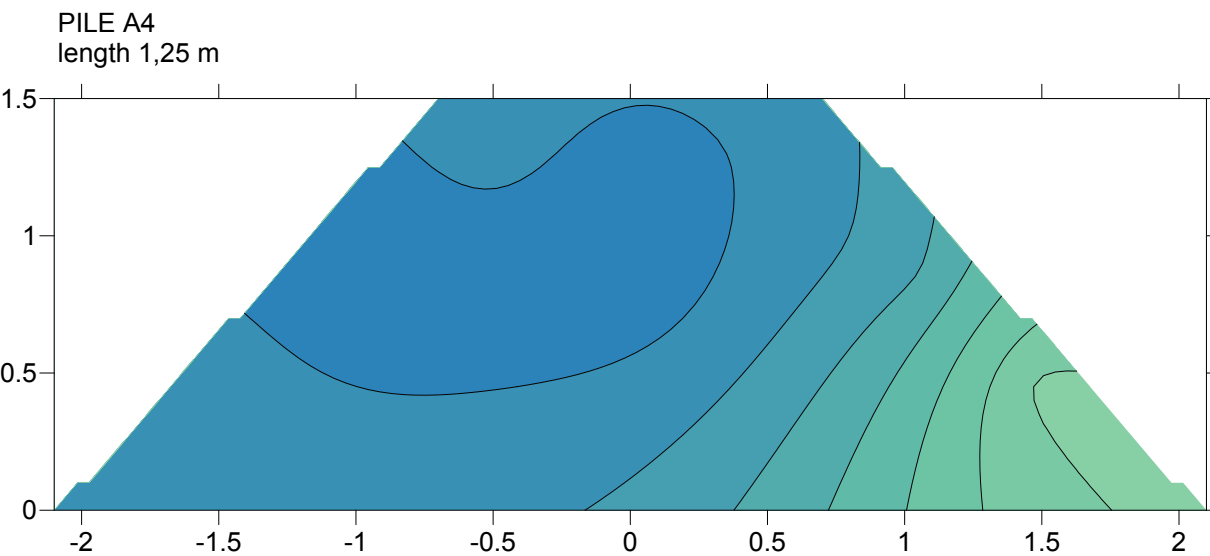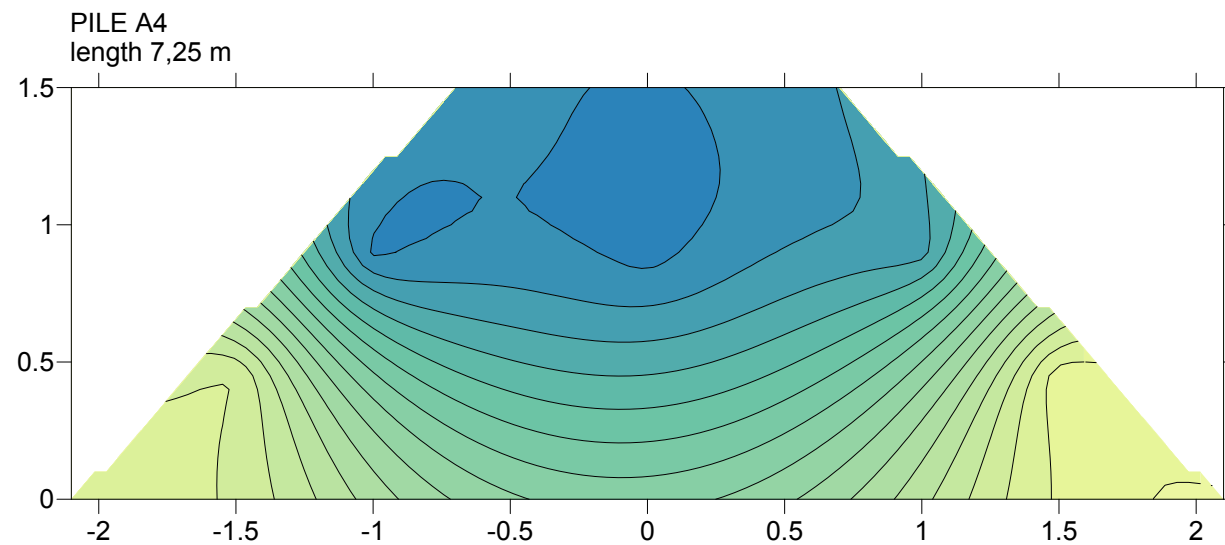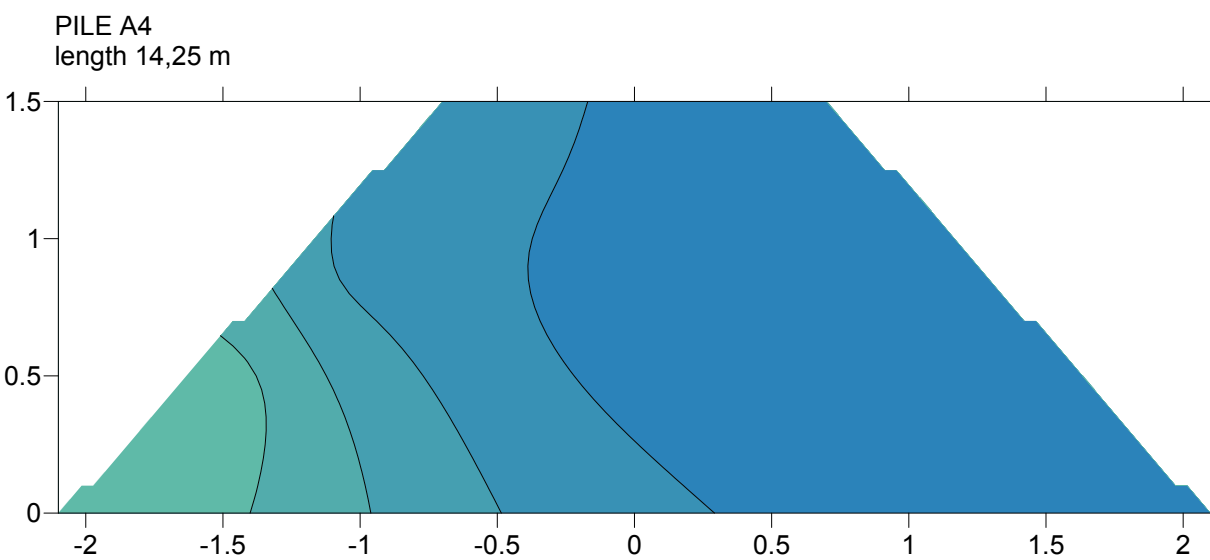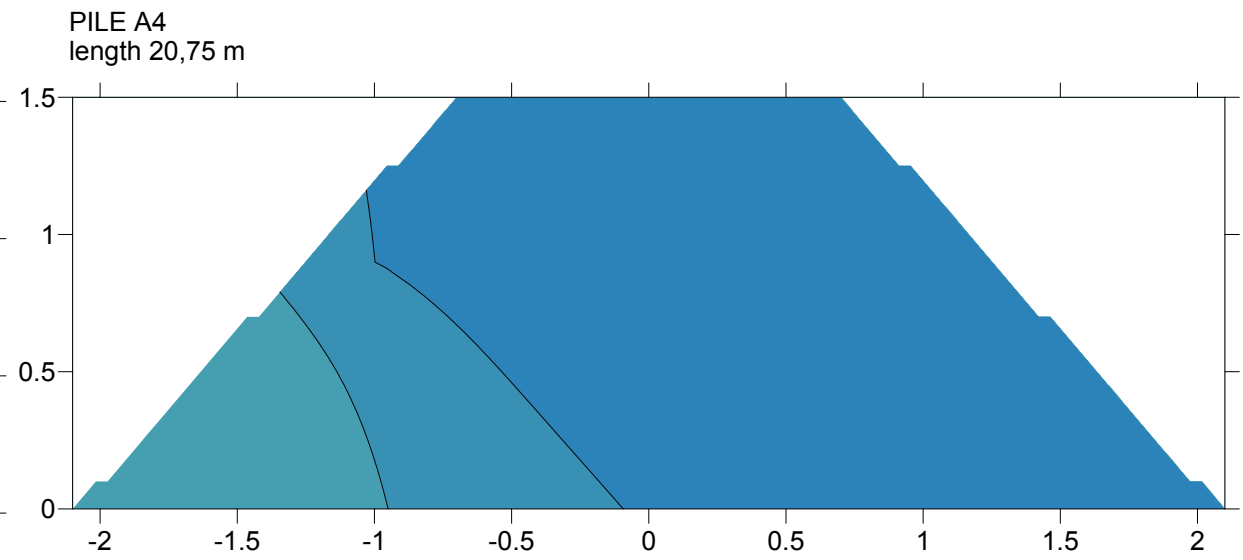

Supplement: s1 [file s1]

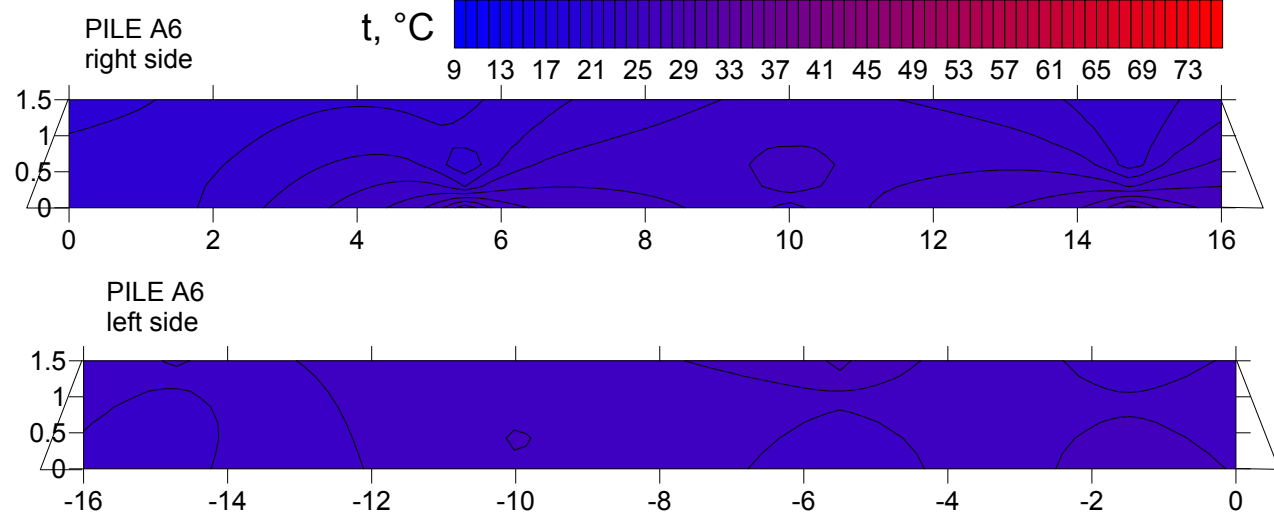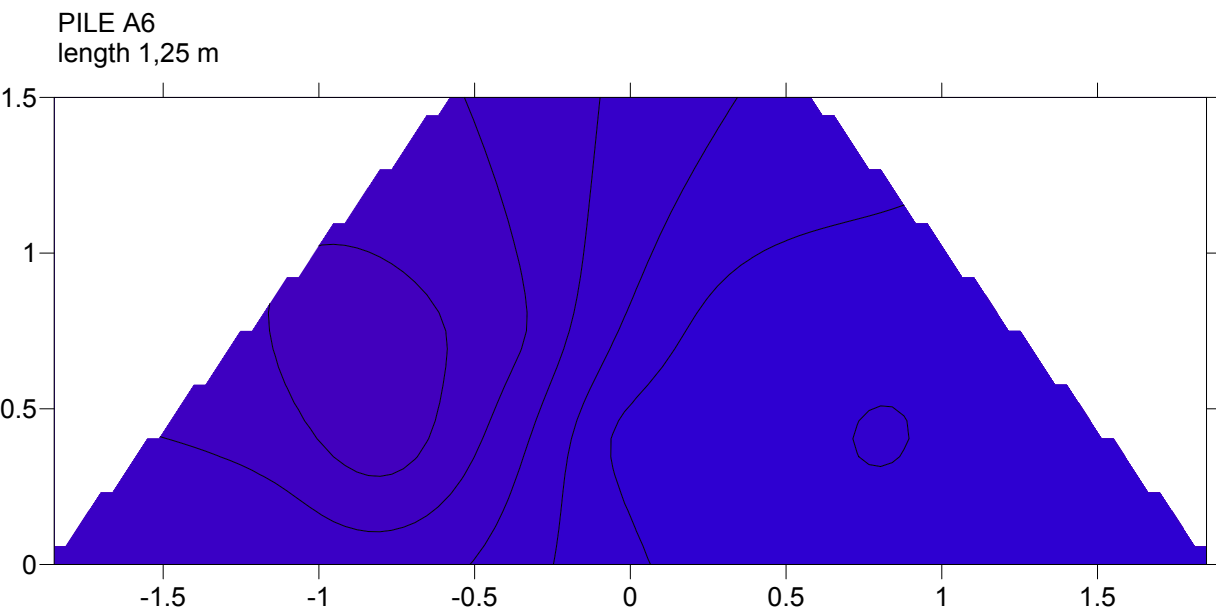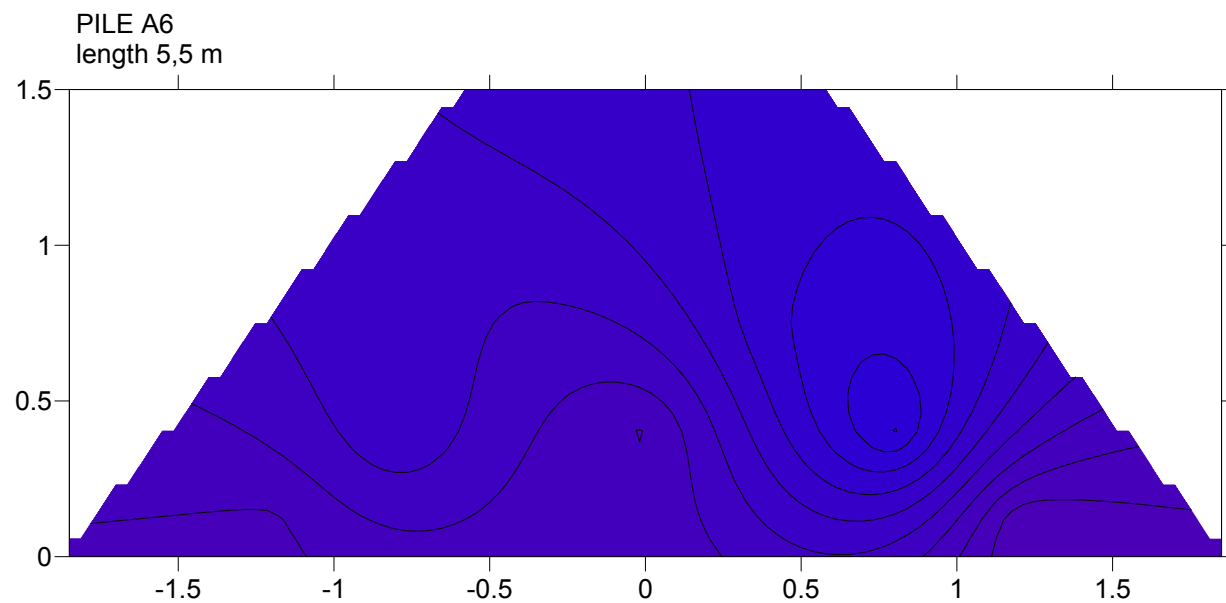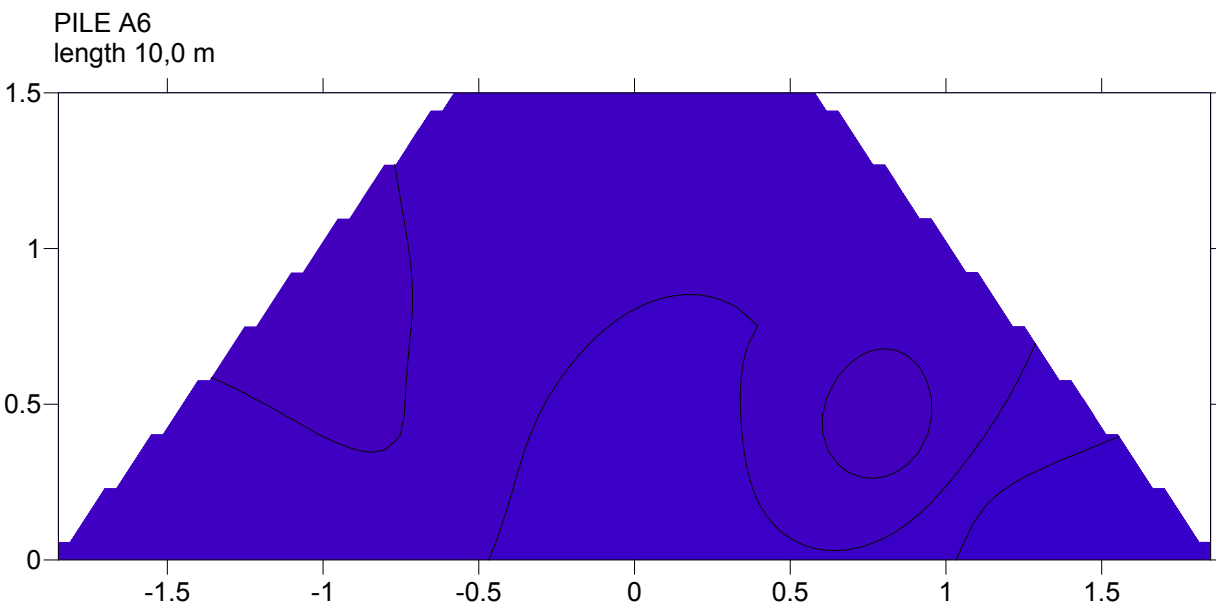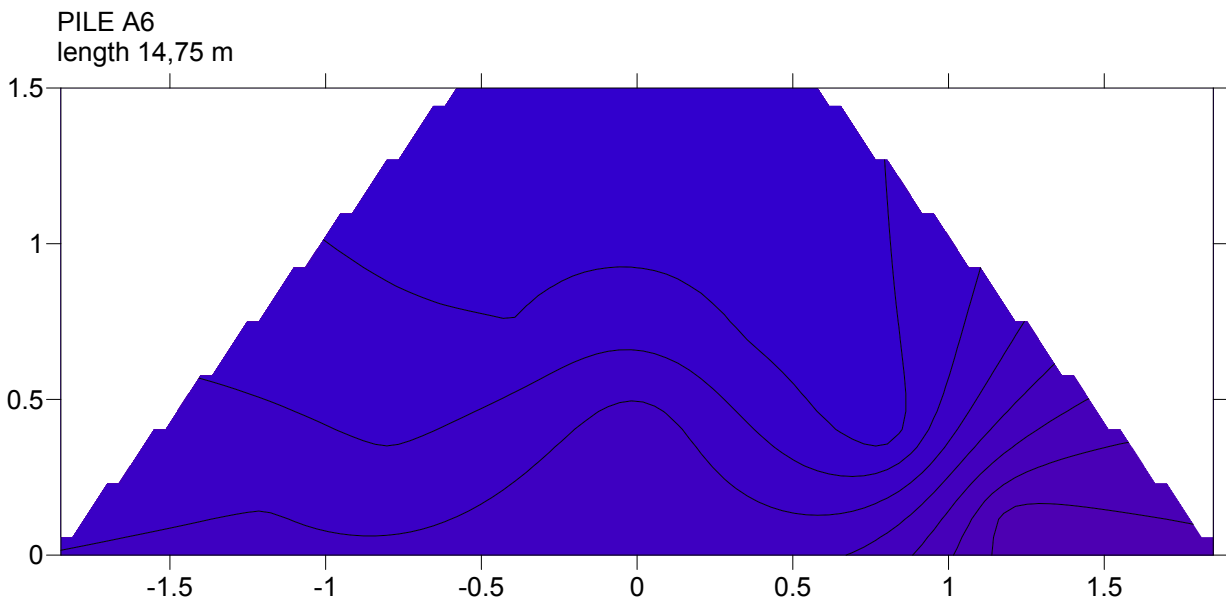

Supplement: s1 [file s1]

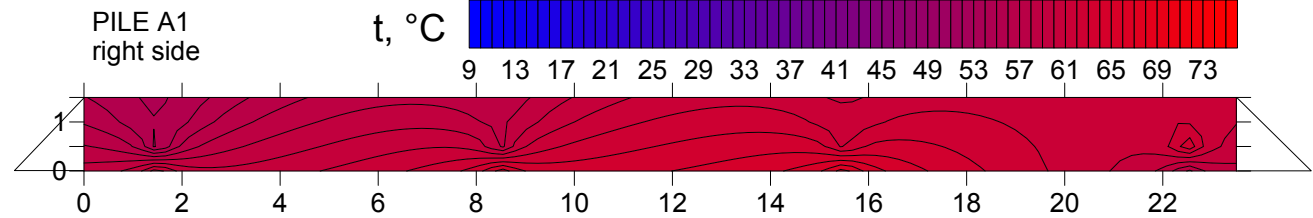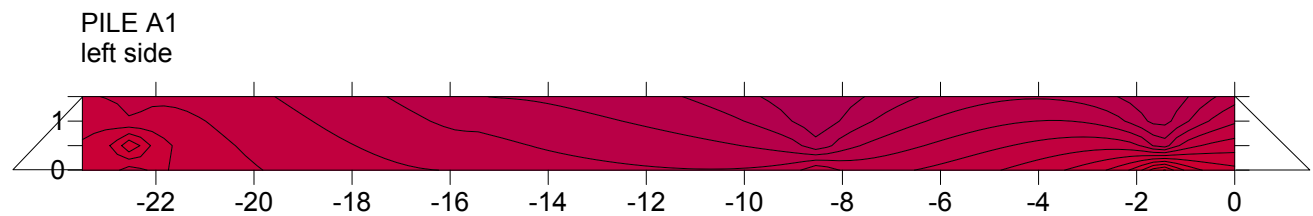

PILE A1  
length 1,5 m

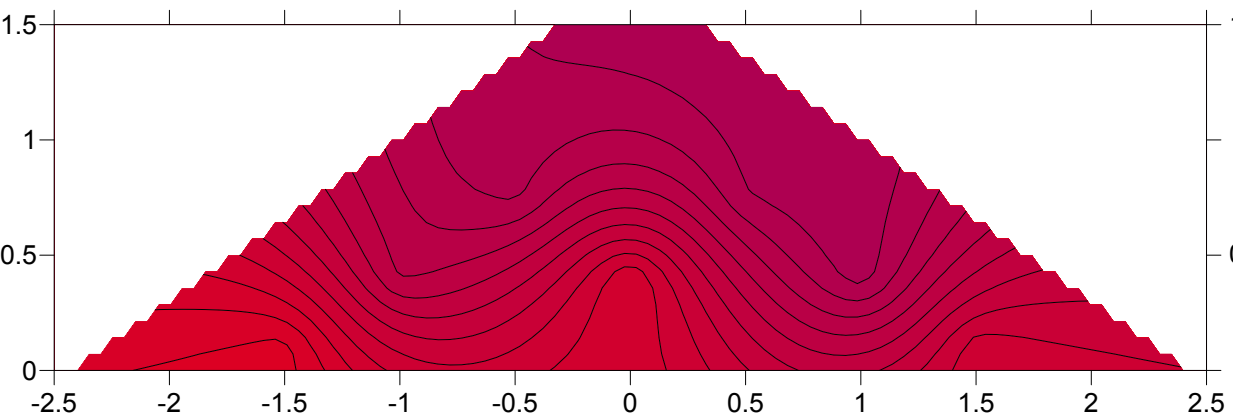

PILE A1  
length 8,5 m

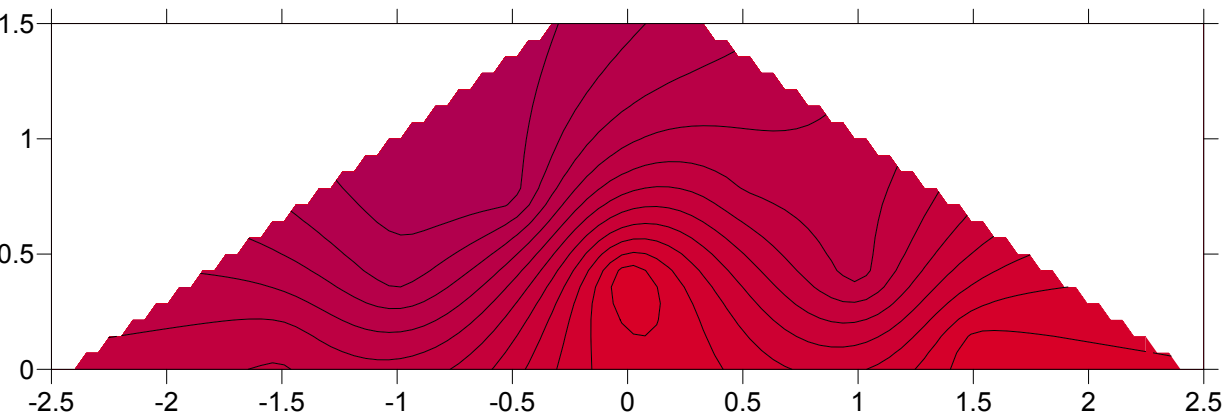

PILE A1  
length 15,5 m

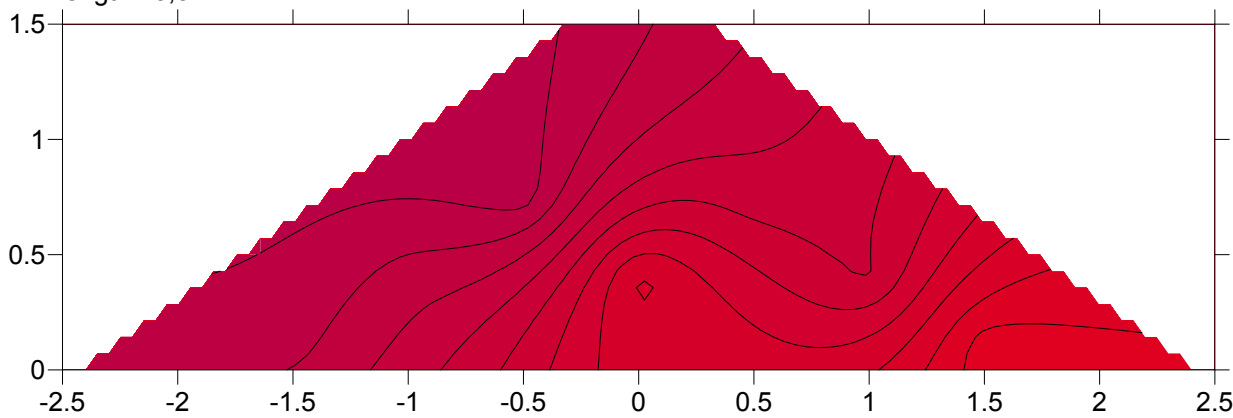

PILE A1  
length 22,5 m

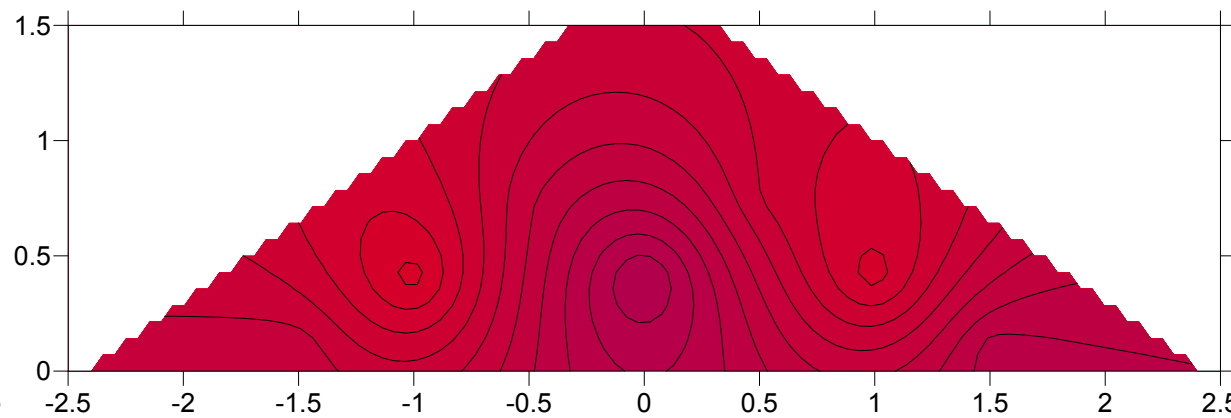

Supplement: s1 [file s1]

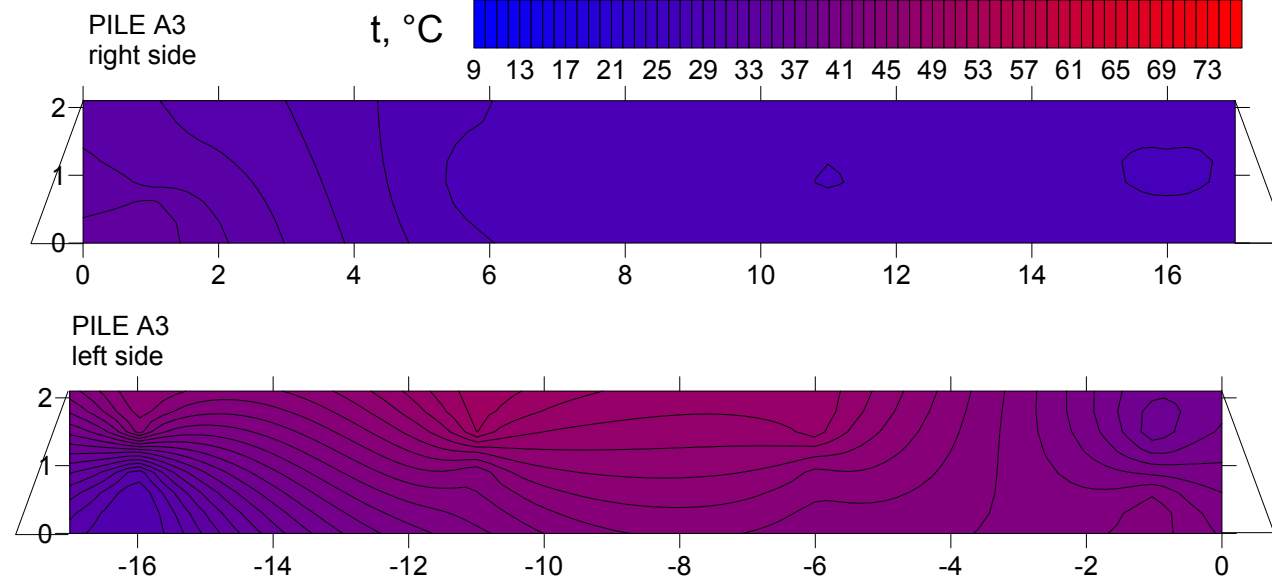

PILE A3  
length 1,0 m

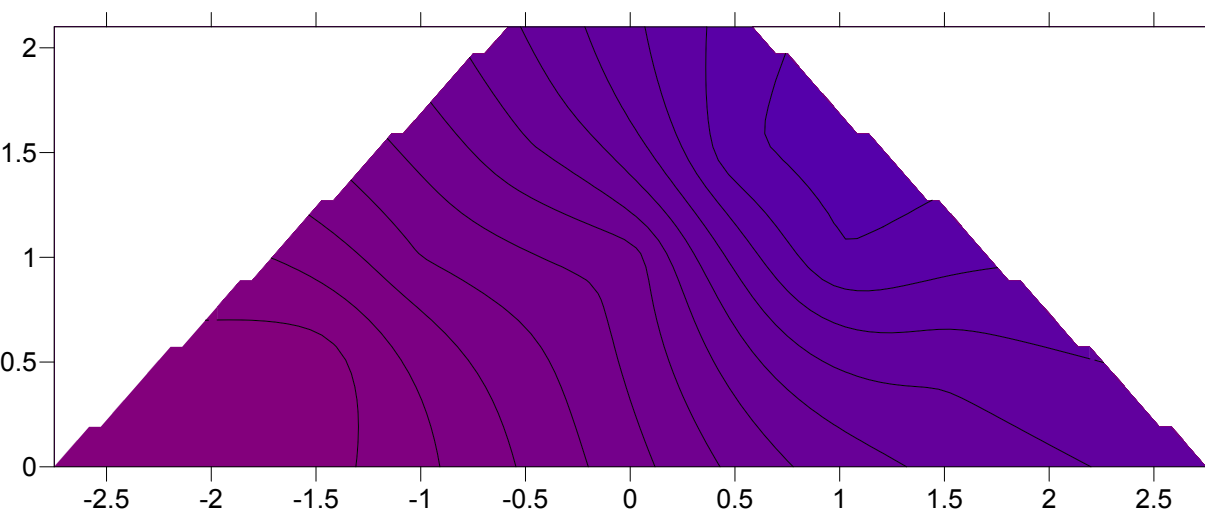

PILE A3  
length 6,0 m

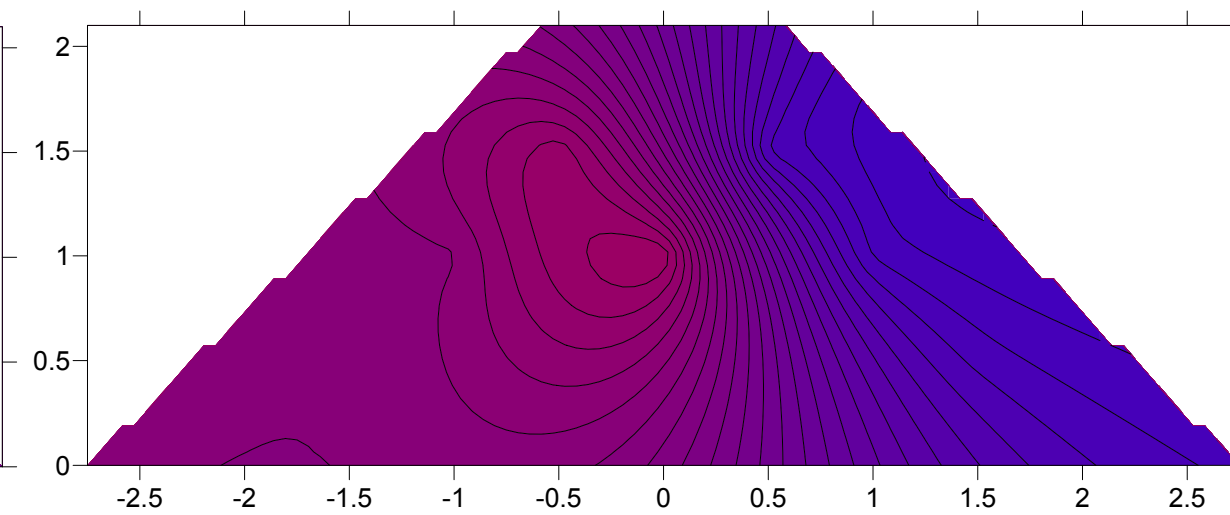

PILE A3  
length 11,0 m

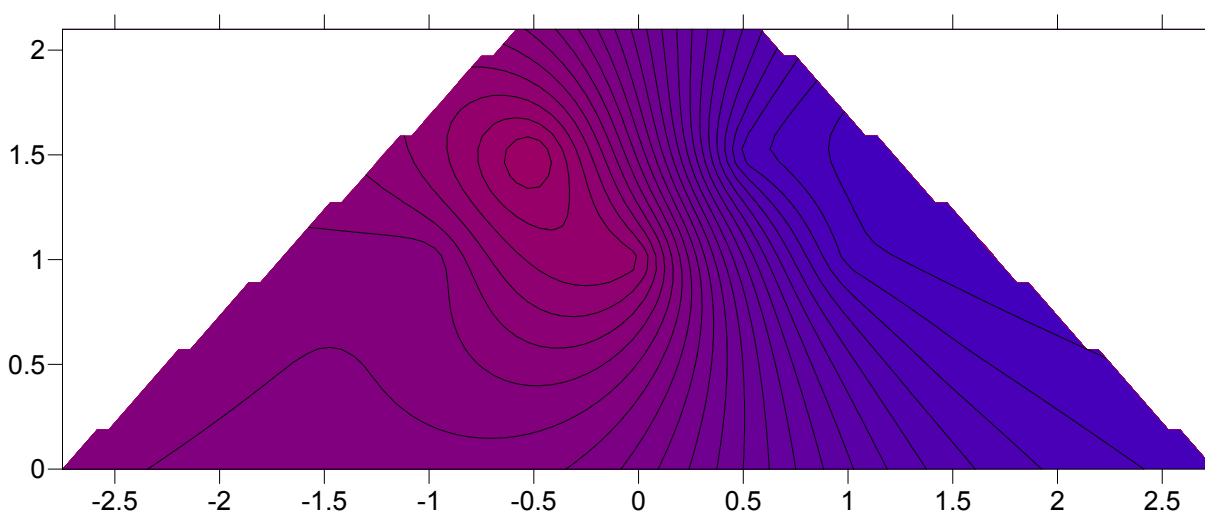

PILE A3  
length 16,0 m

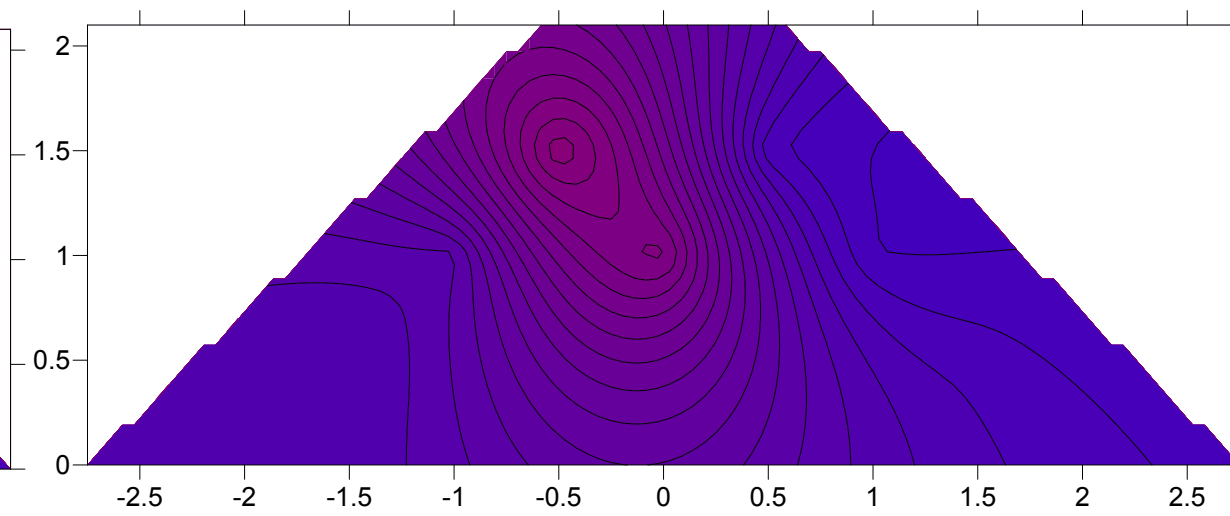

Supplement: s1 [file s1]

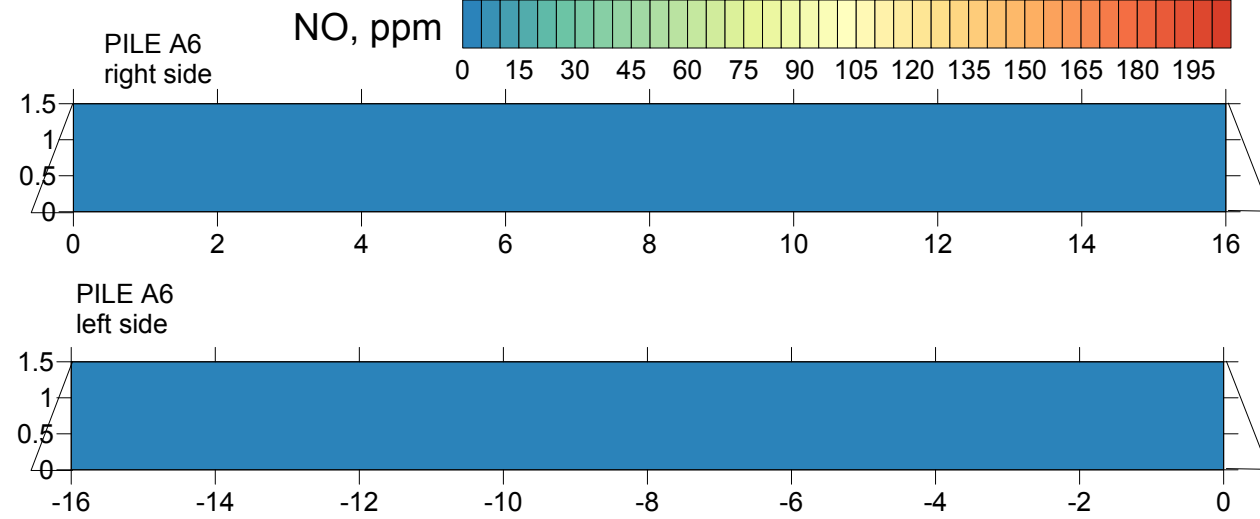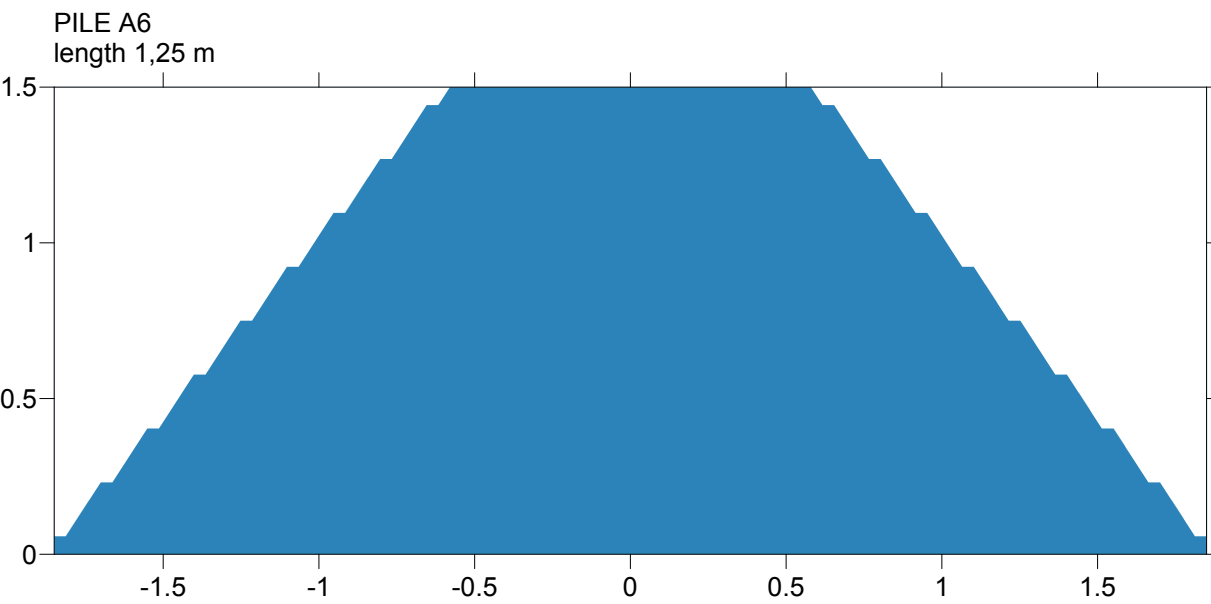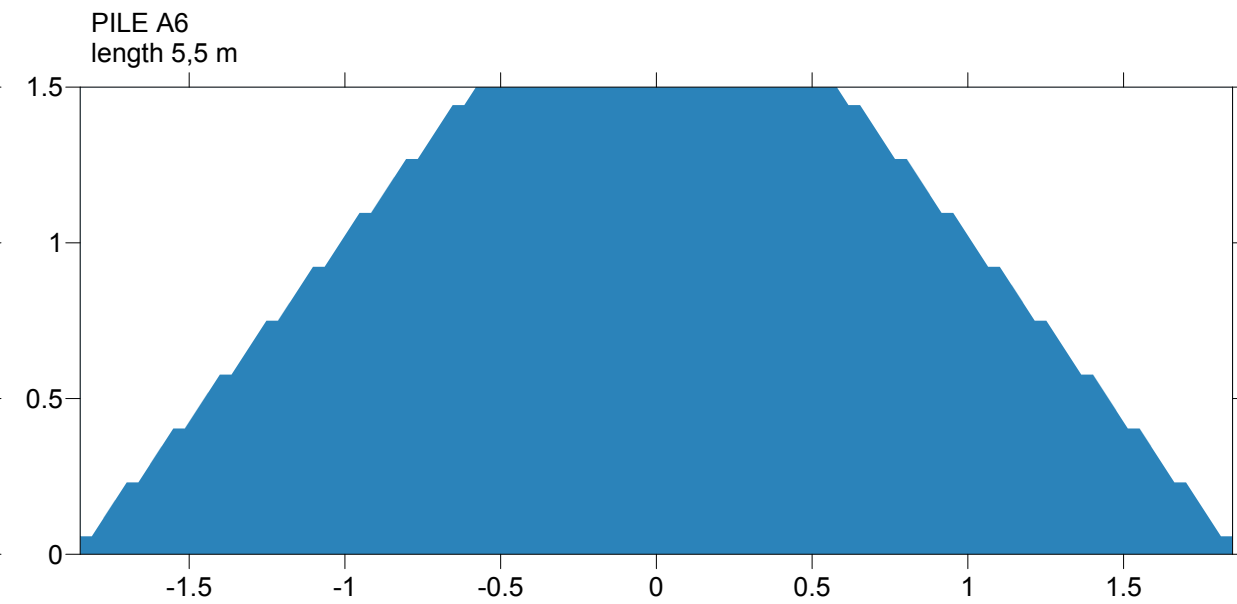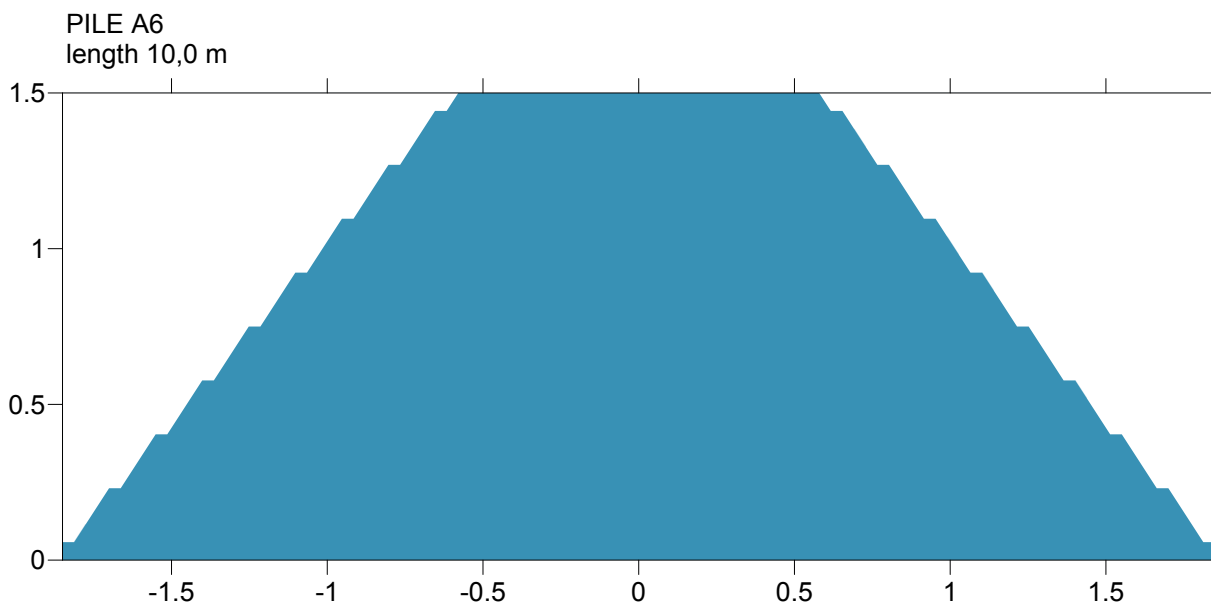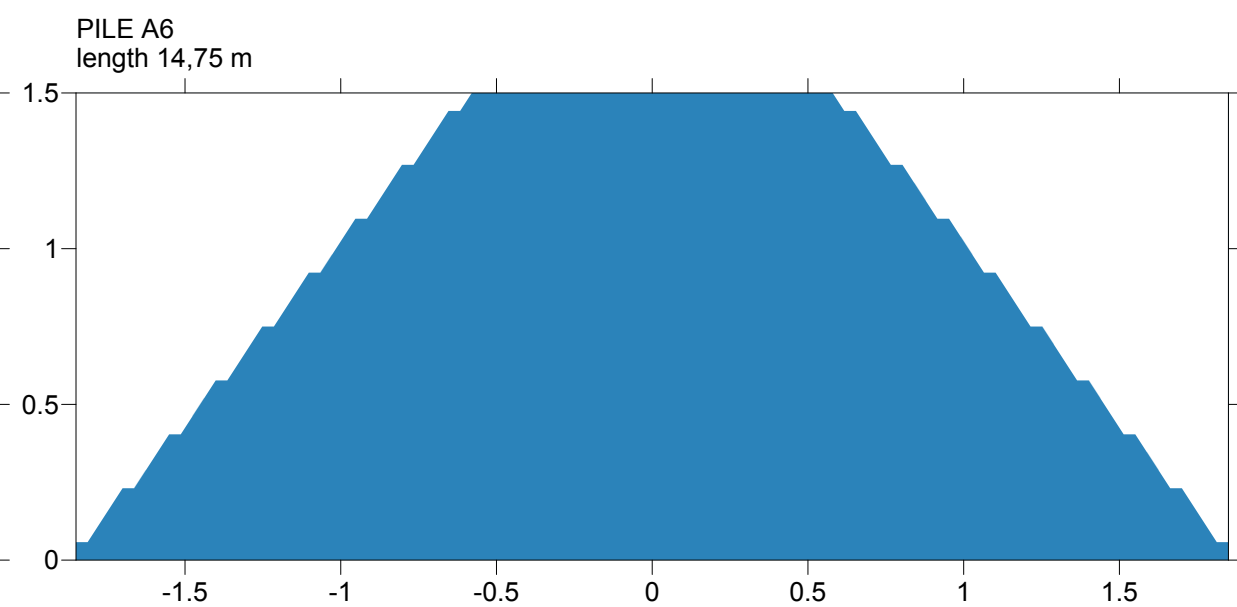

Supplement: s1 [file s1]

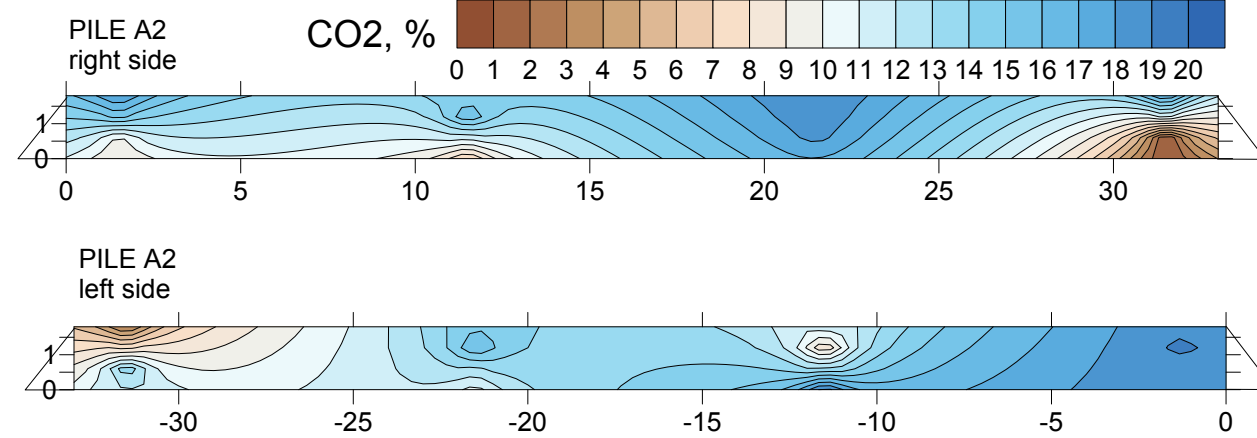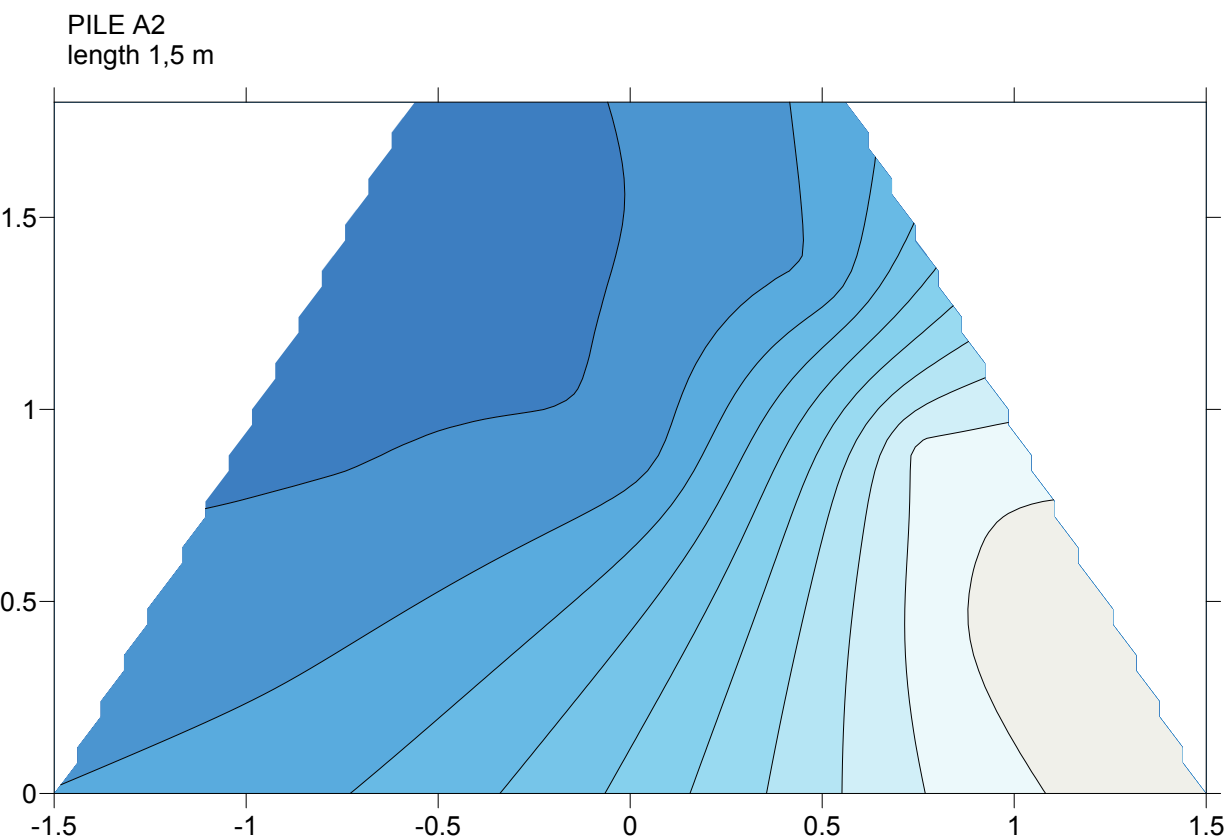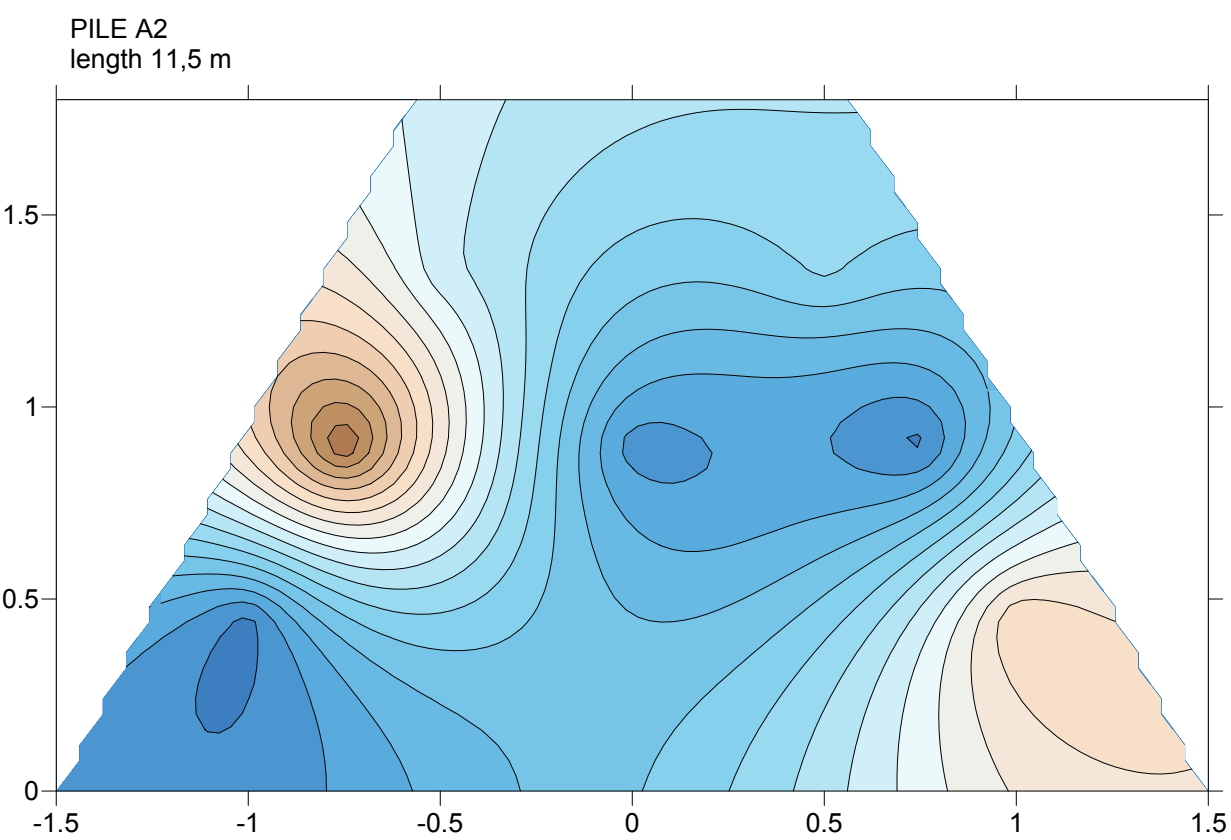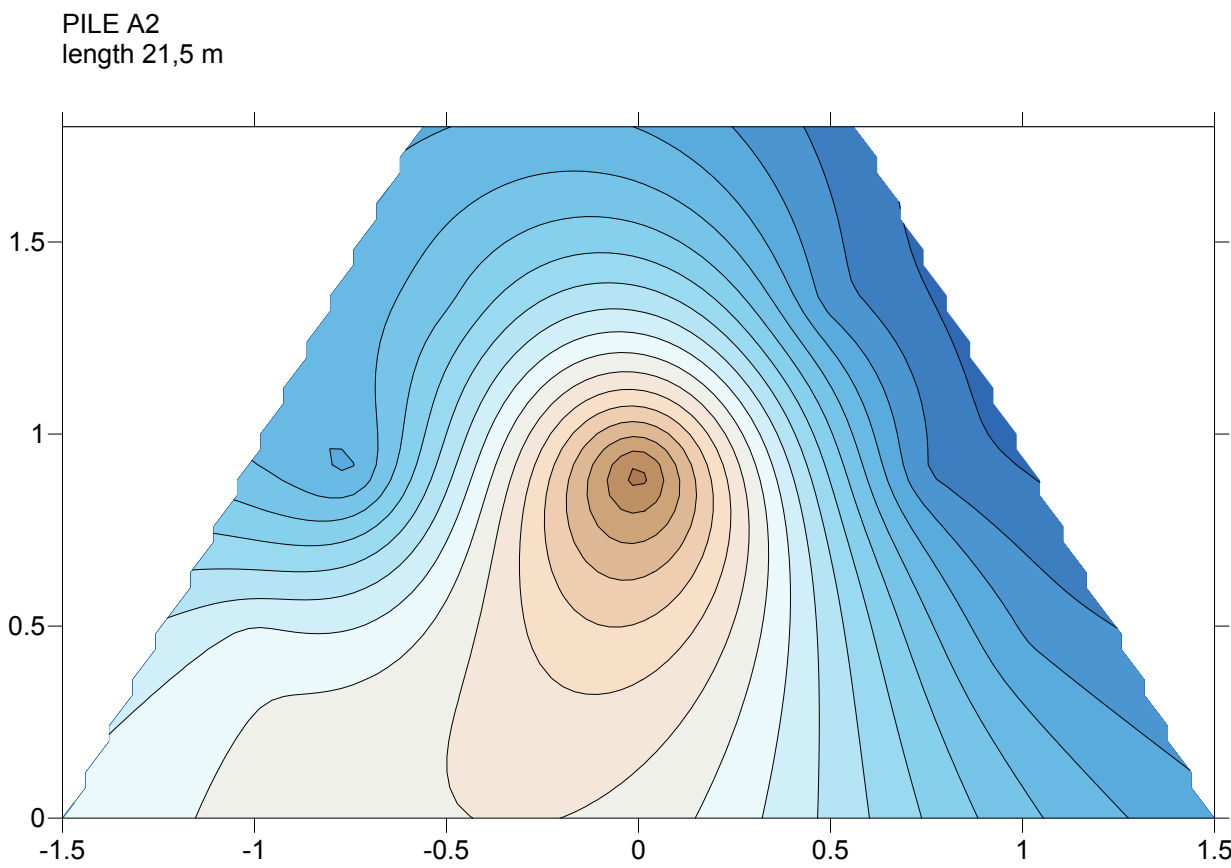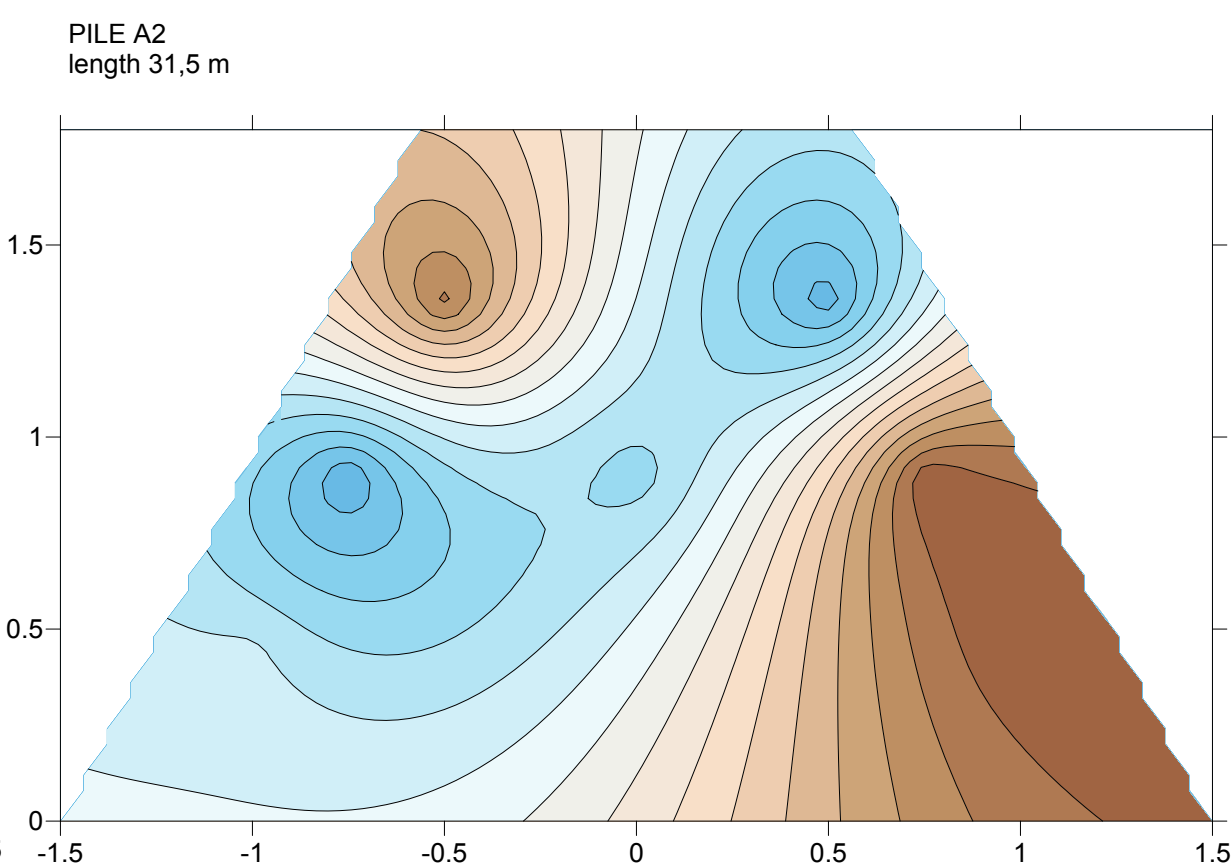

Supplement: s1 [file s1]

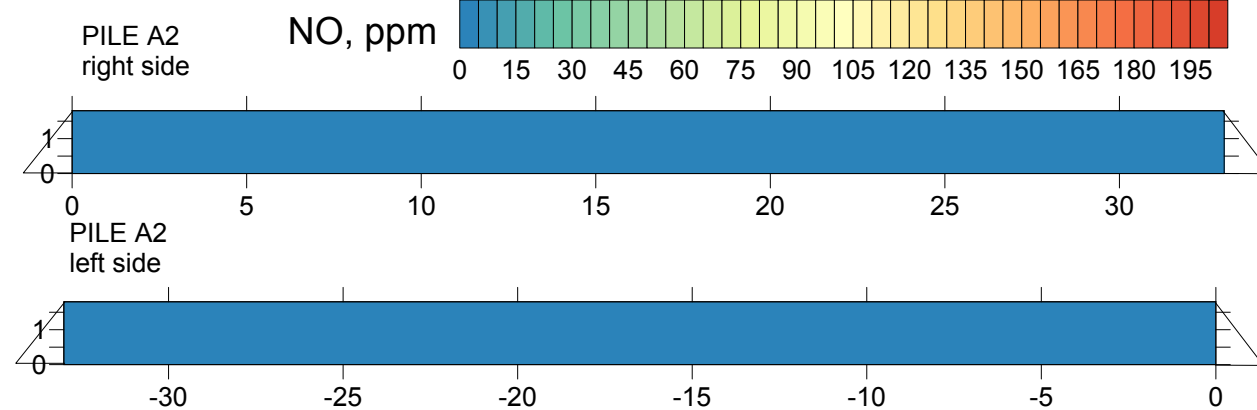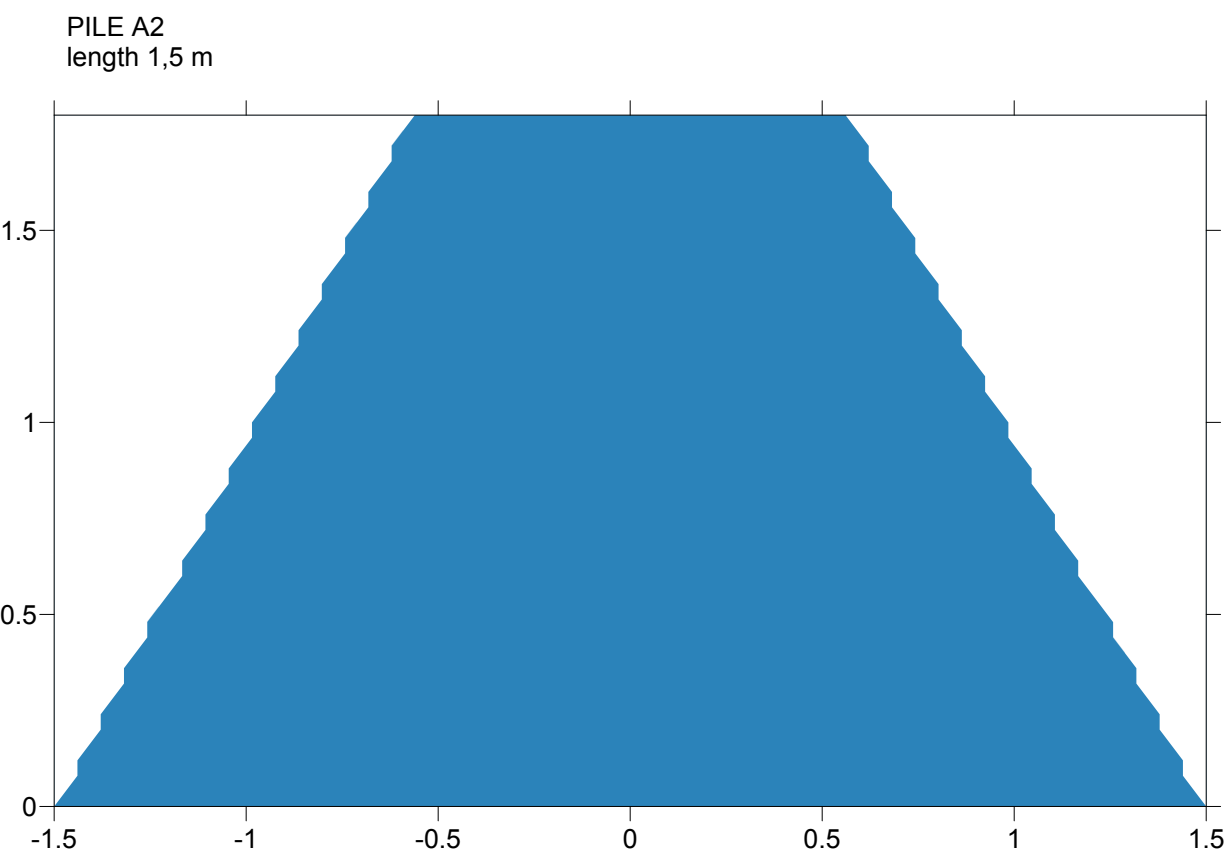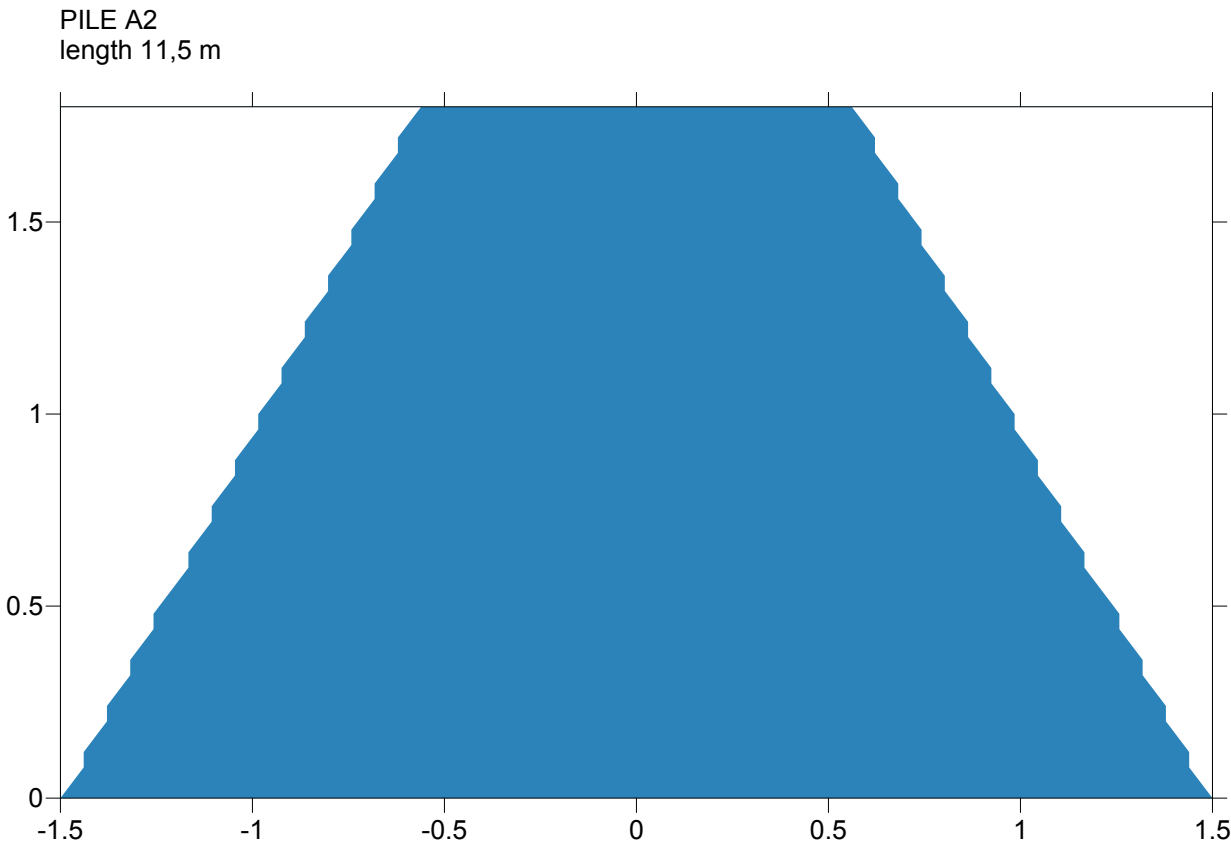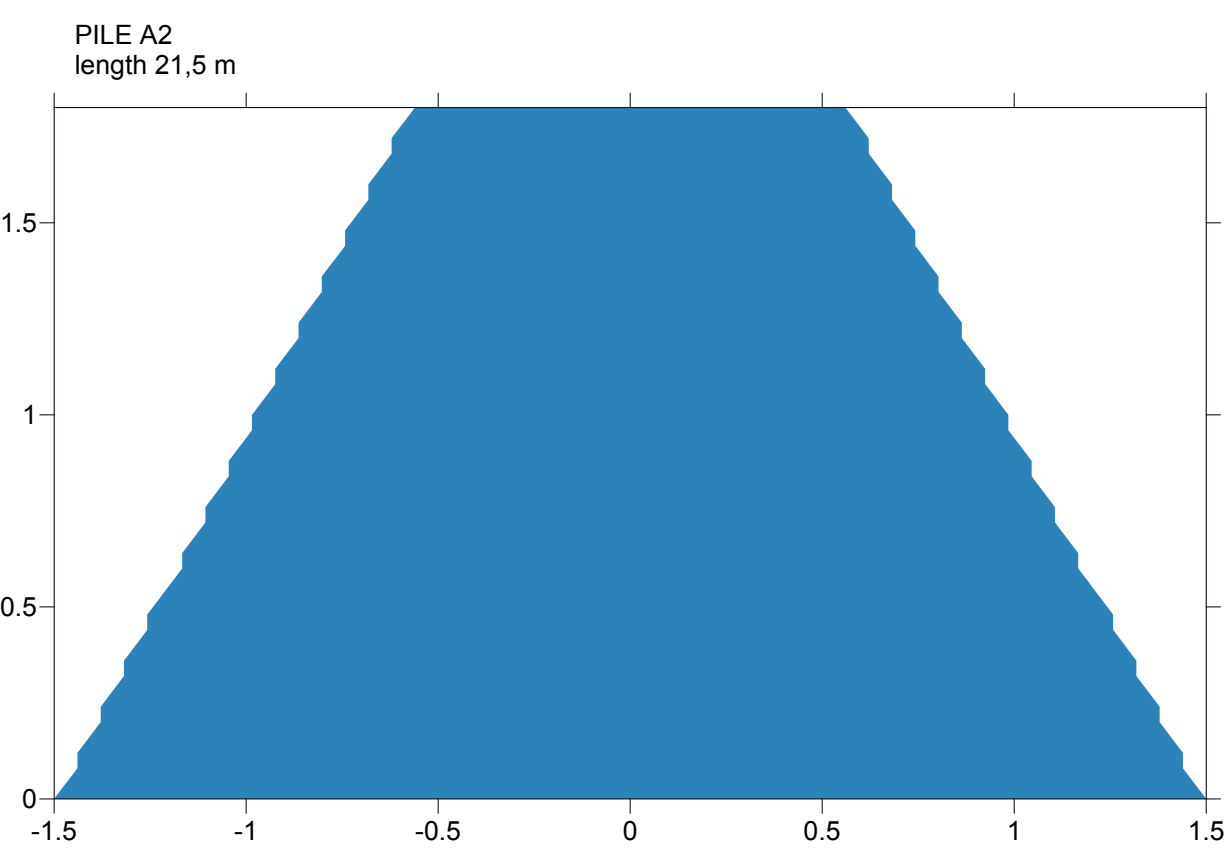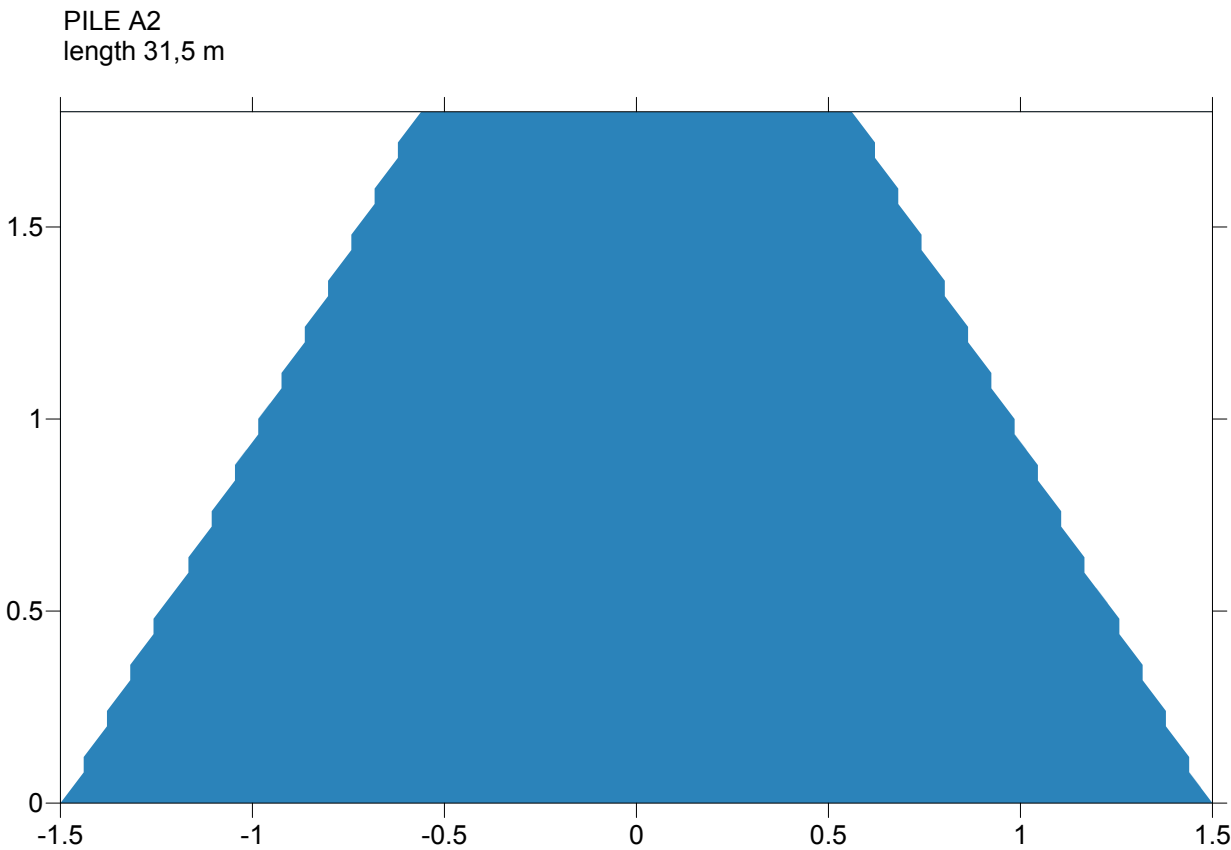

Supplement: s1 [file s1]

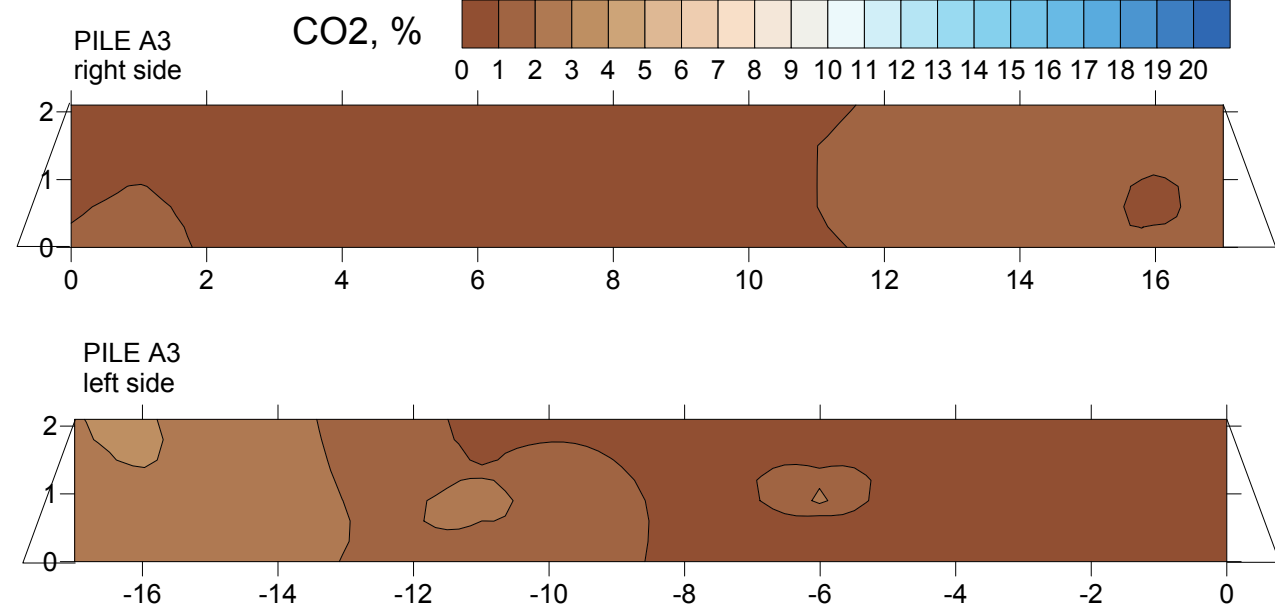

PILE A3  
length 1,0 m

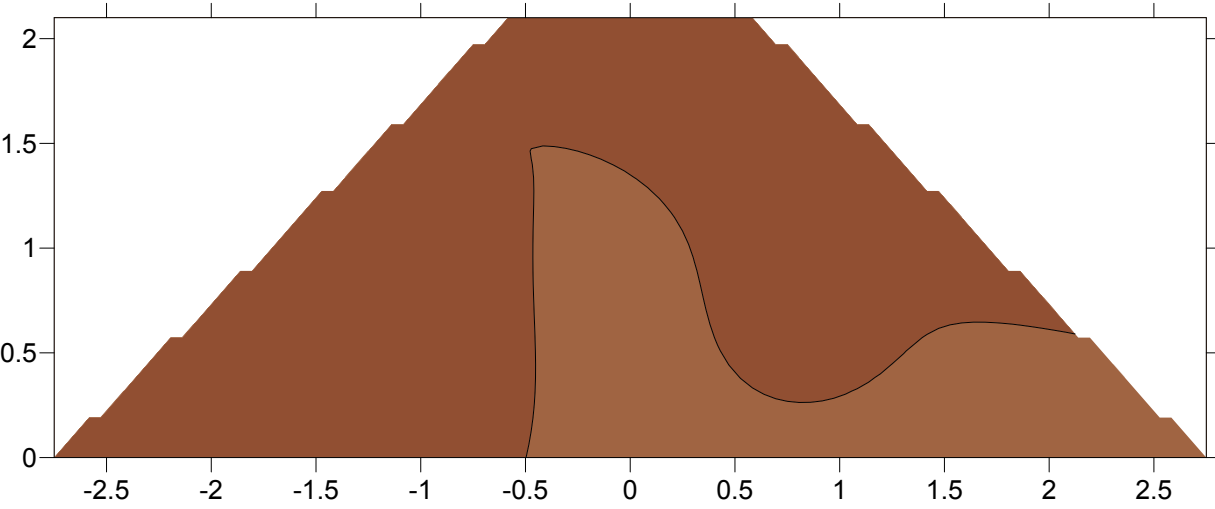

PILE A3  
length 6,0 m

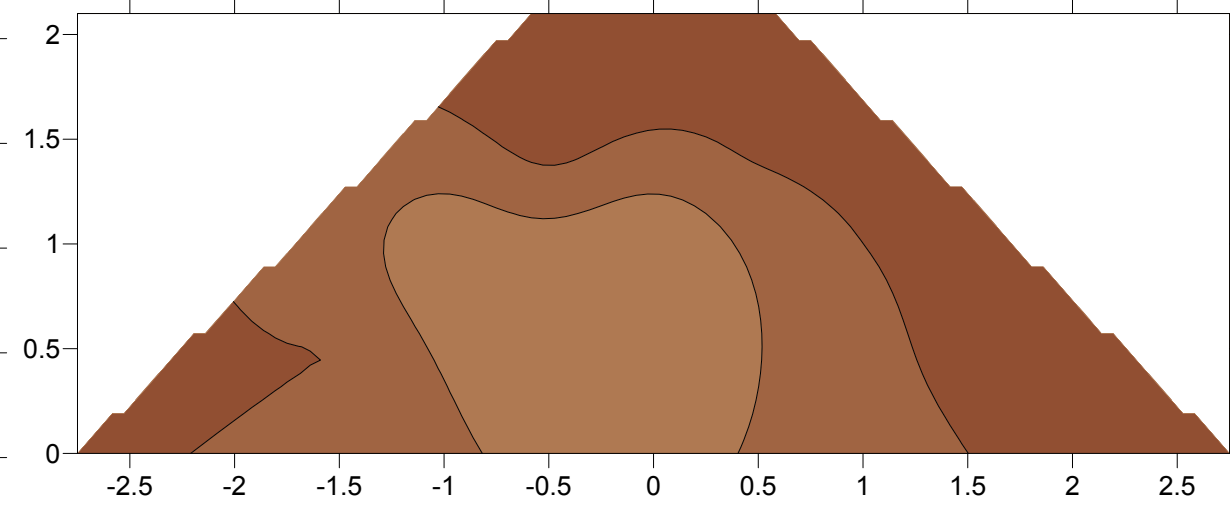

PILE A3  
length 11,0 m

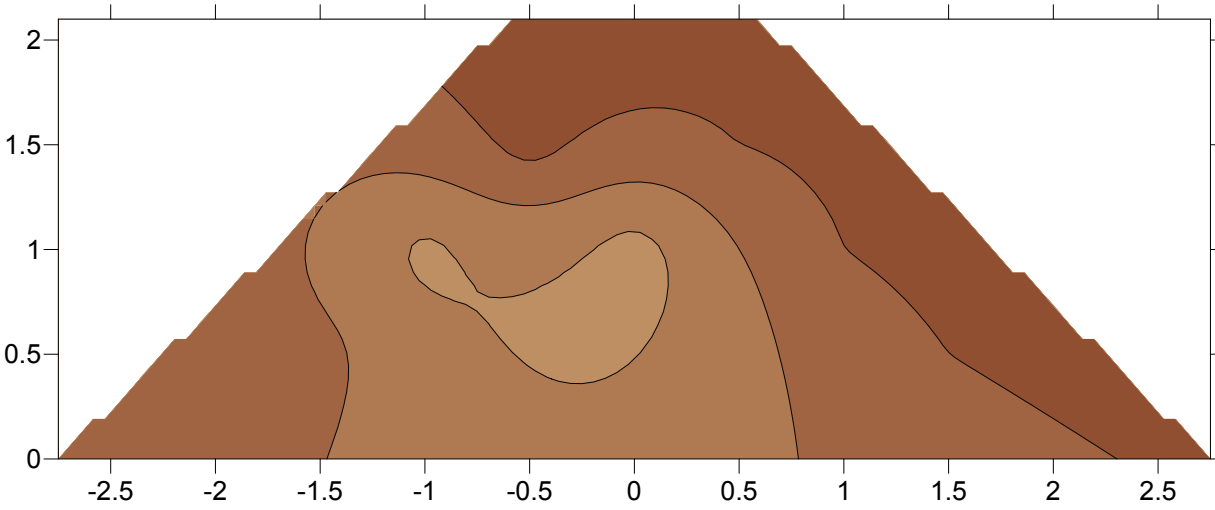

PILE A3  
length 16,0 m

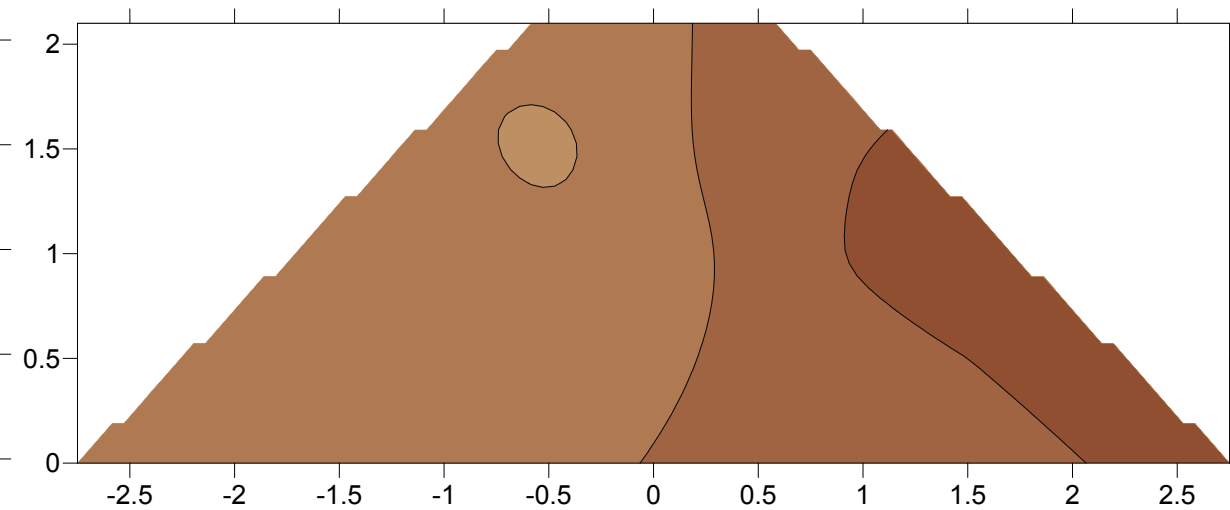

Supplement: s1 [file s1]

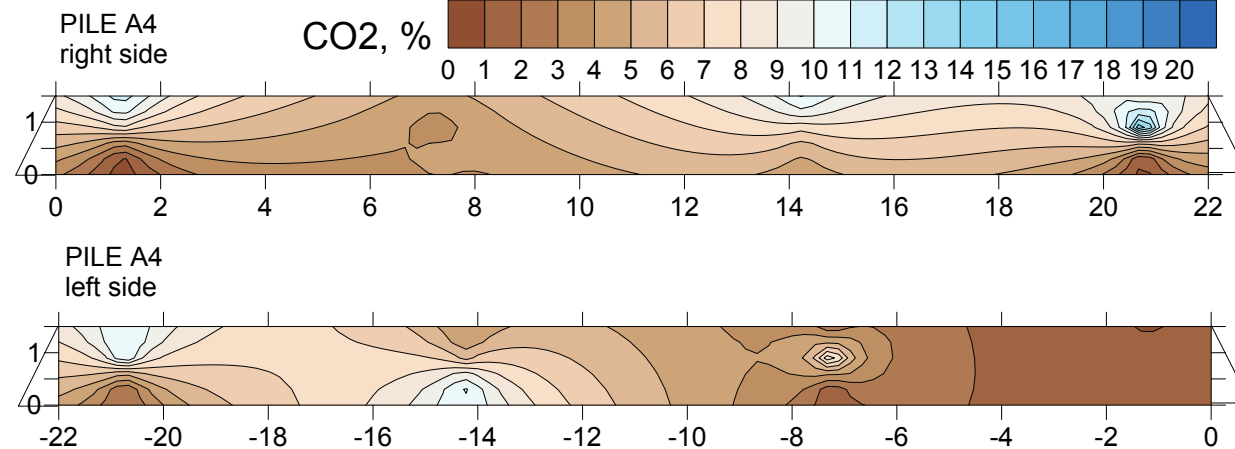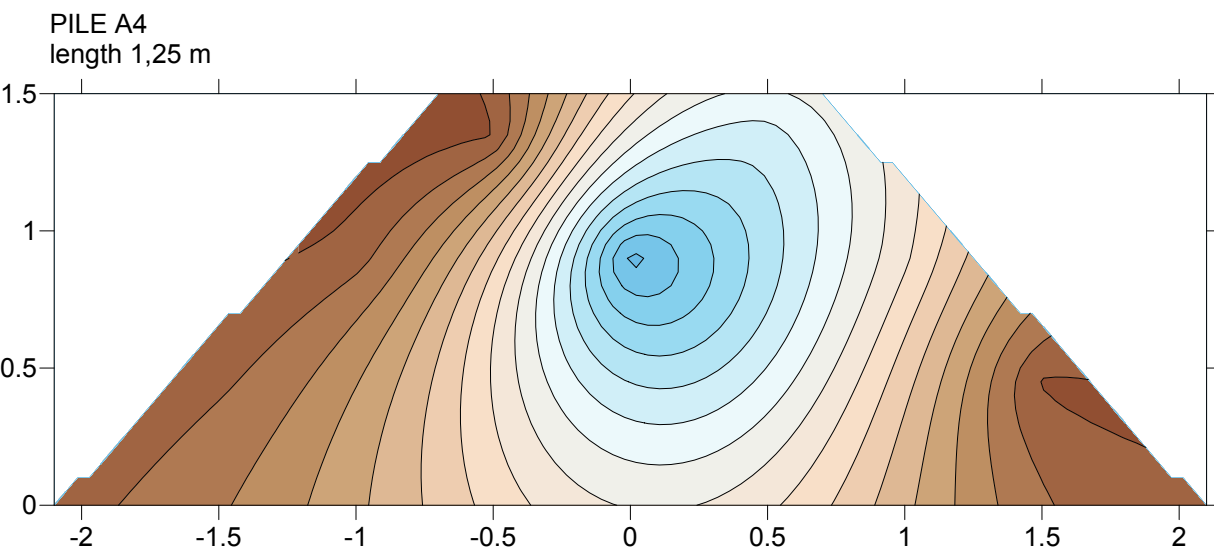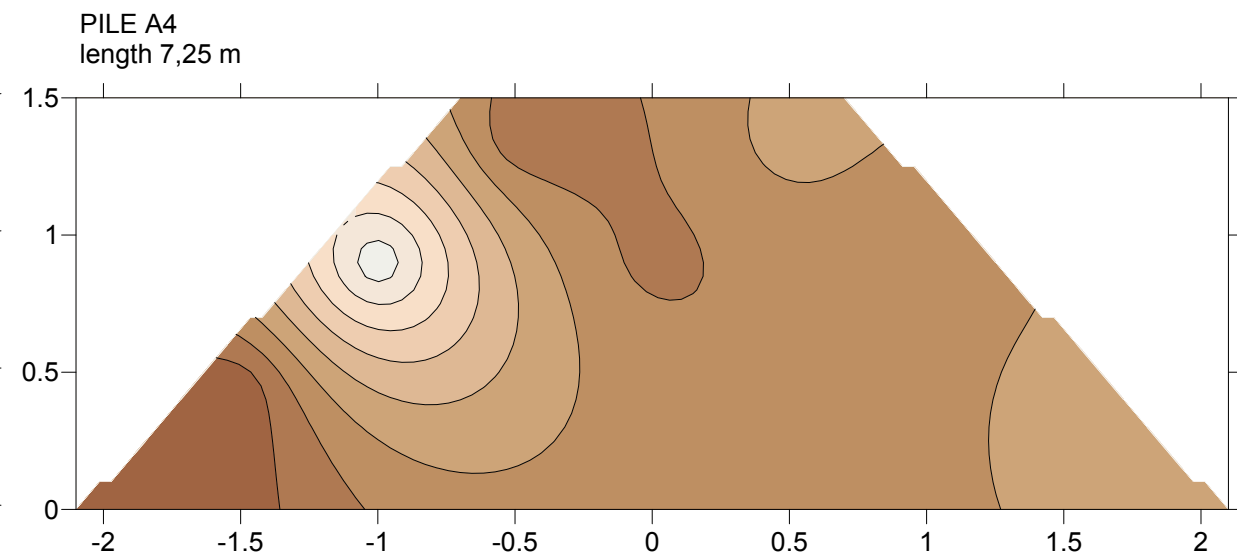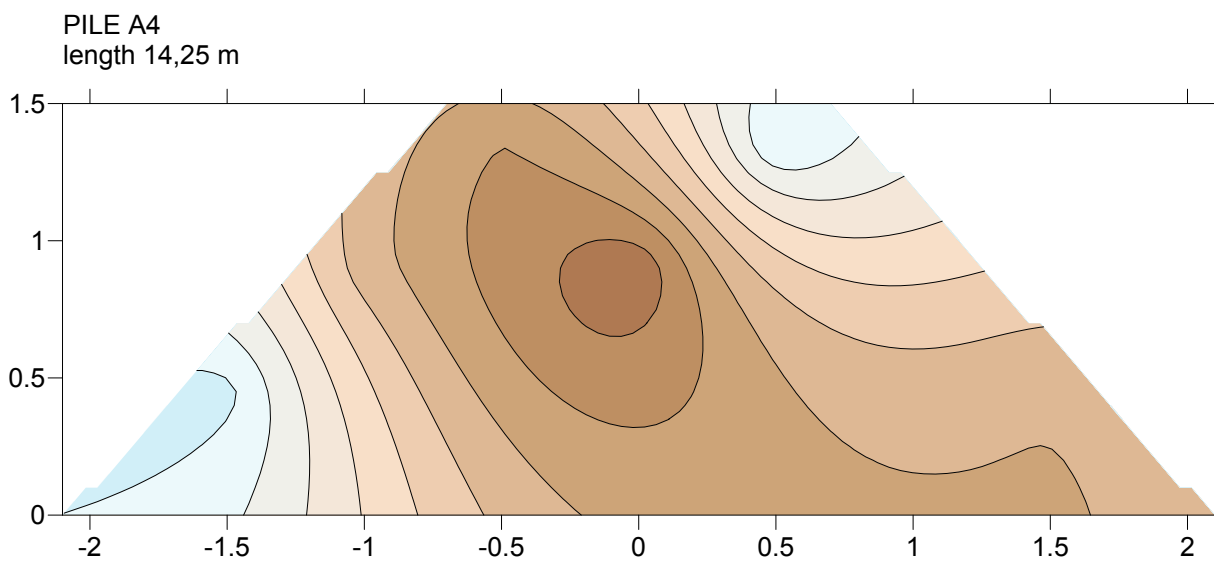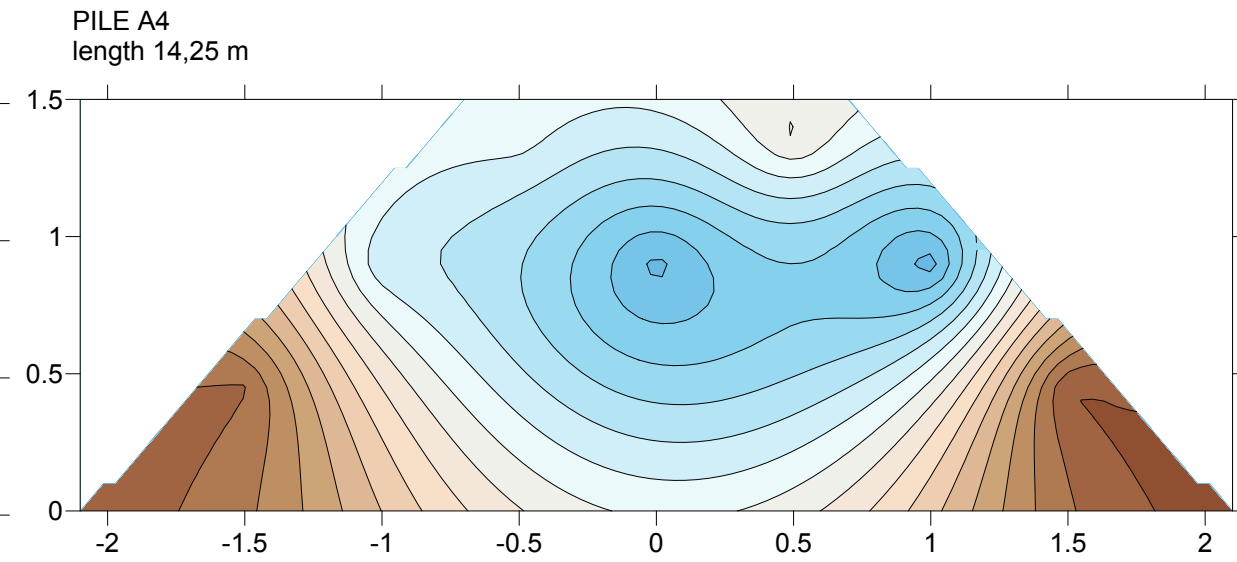

Supplement: s1 [file s1]

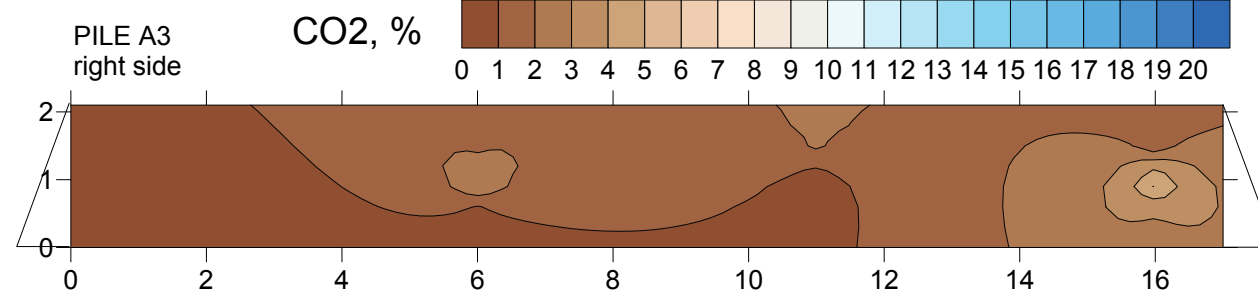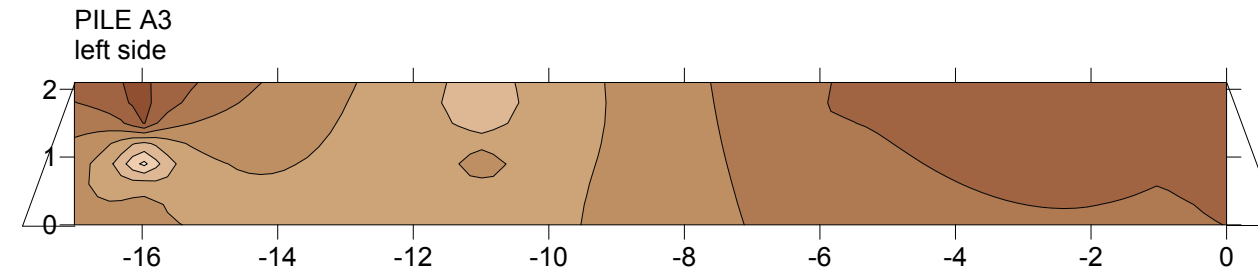

PILE A3  
length 1,0 m

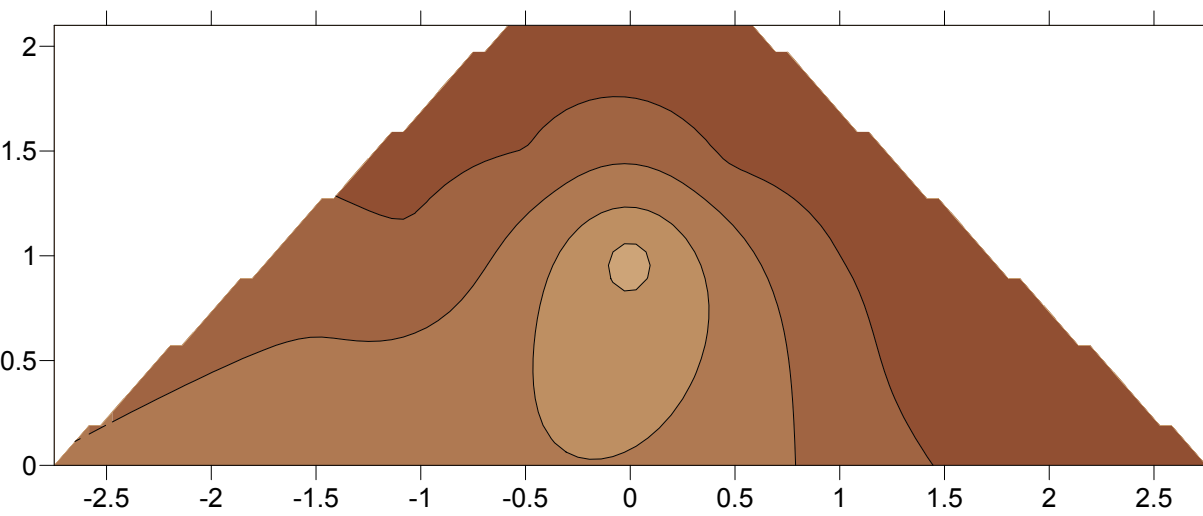

PILE A3  
length 6,0 m

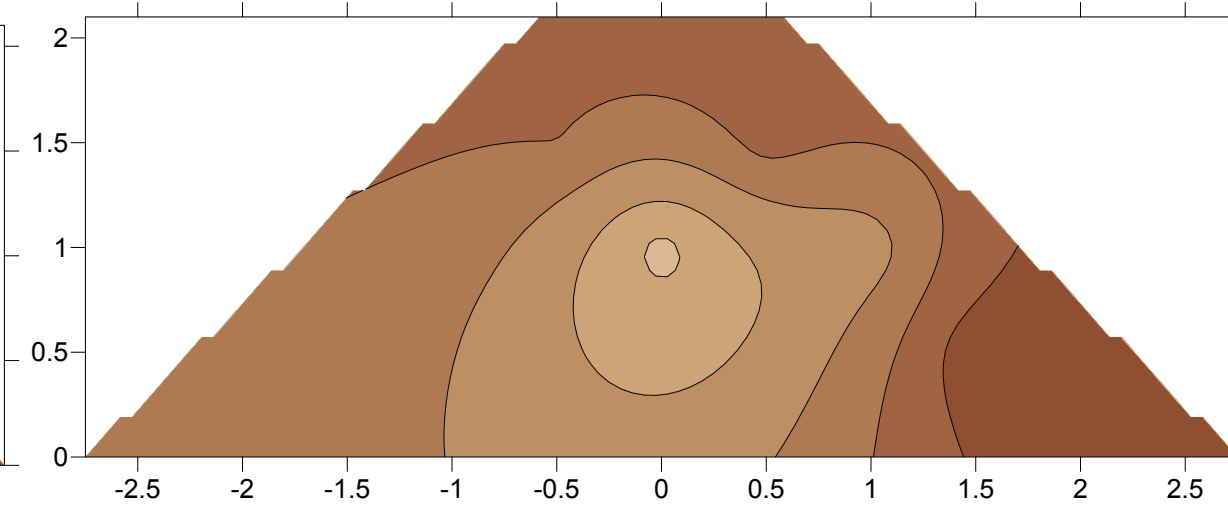

PILE A3  
length 11,0 m

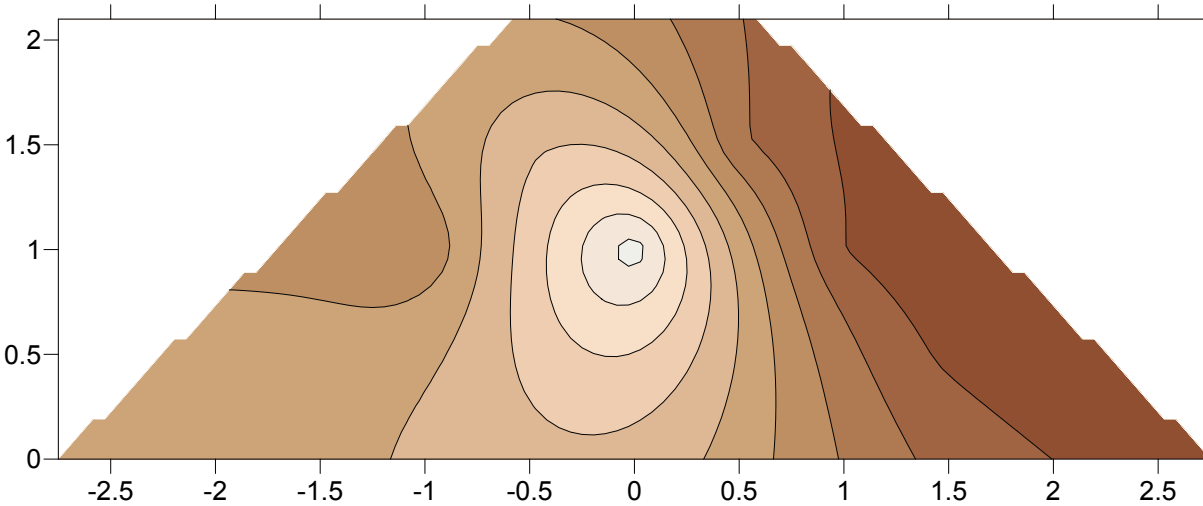

PILE A3  
length 16,0 m

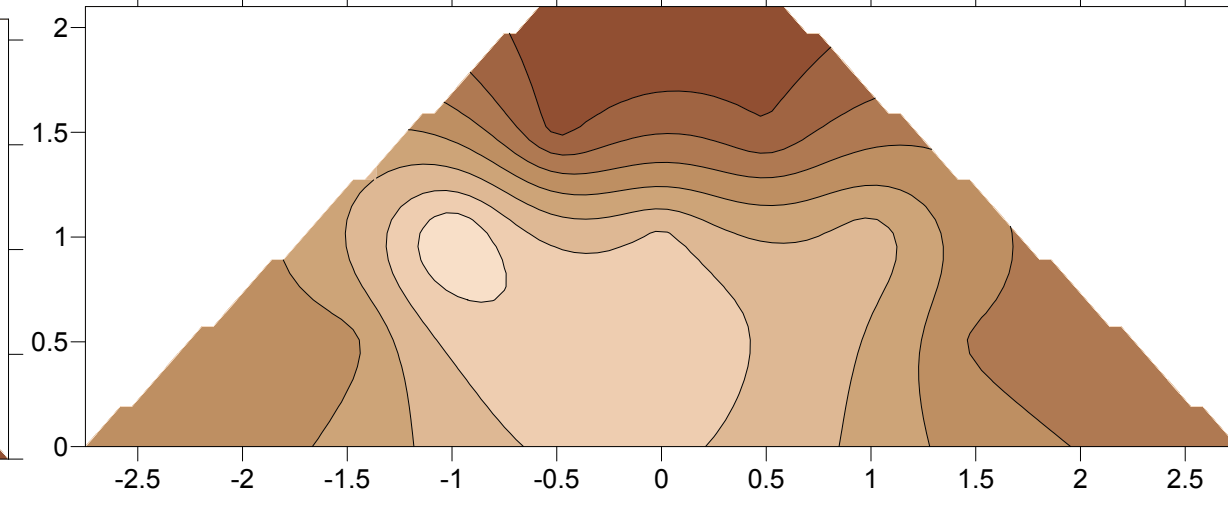

Supplement: s1 [file s1]

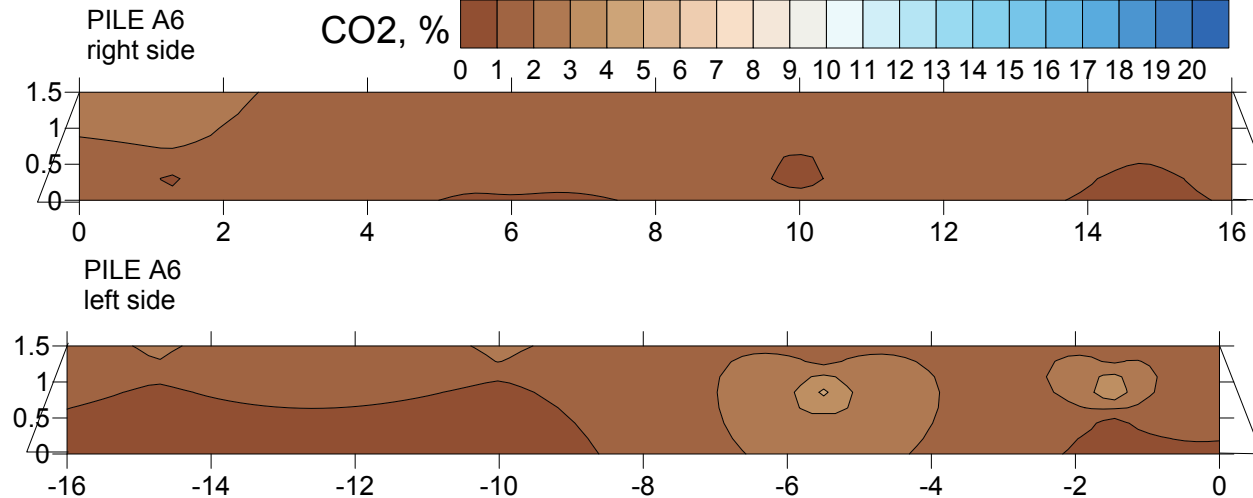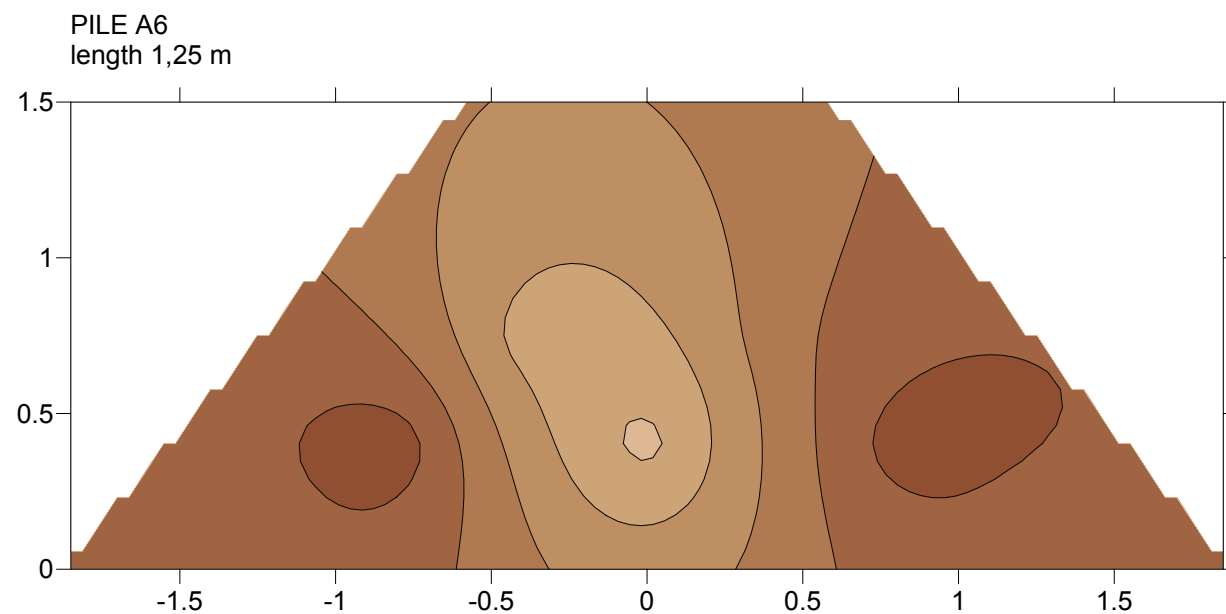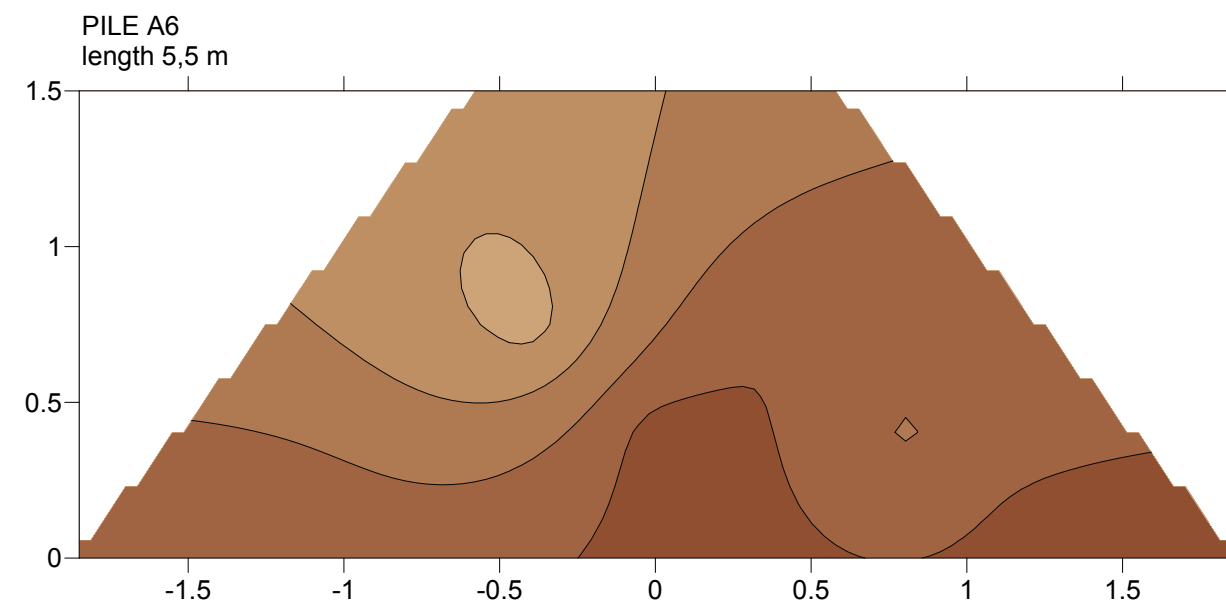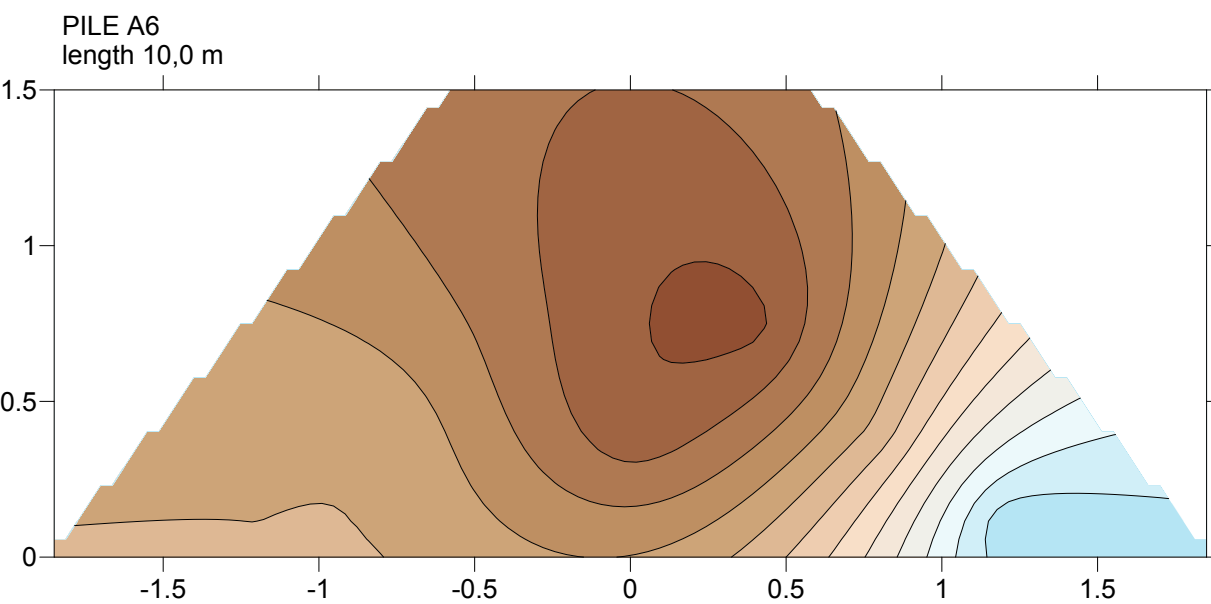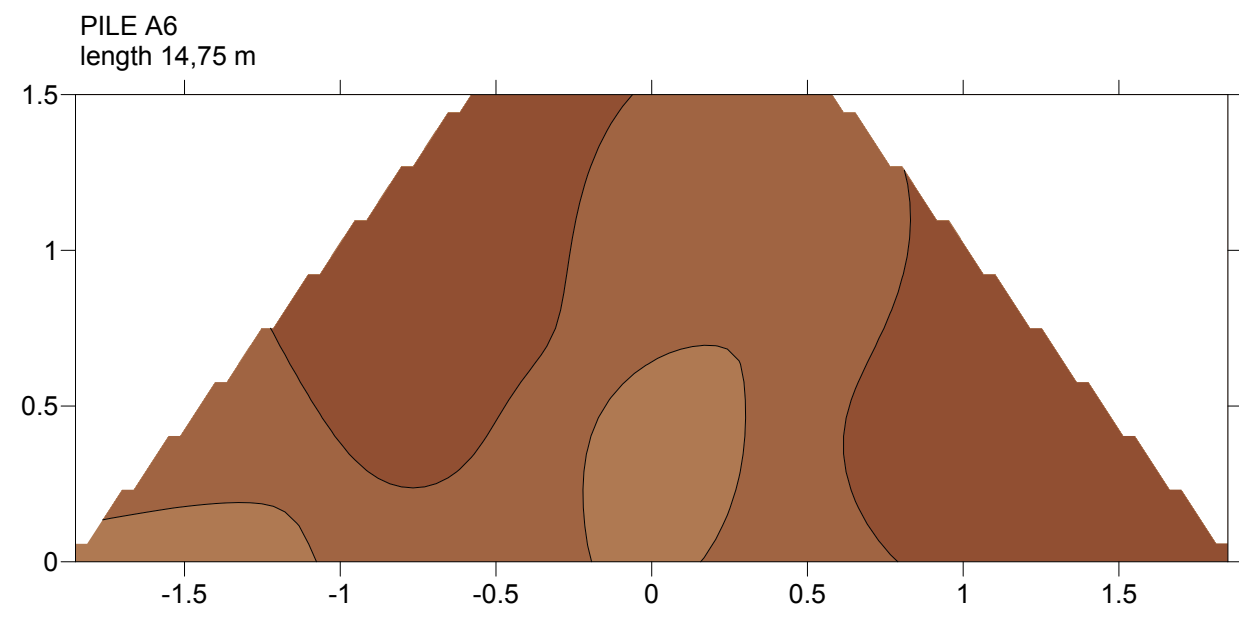

Supplement: s1 [file s1]

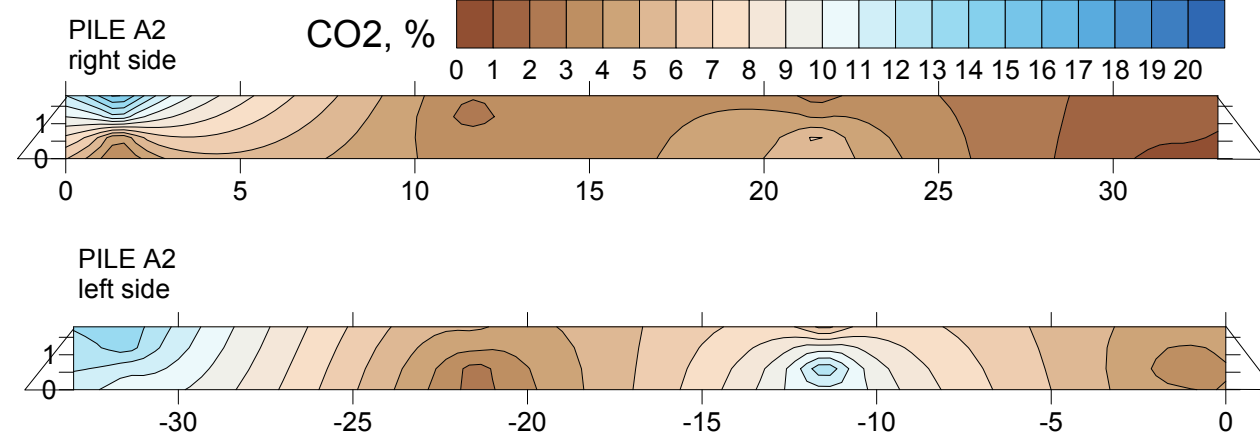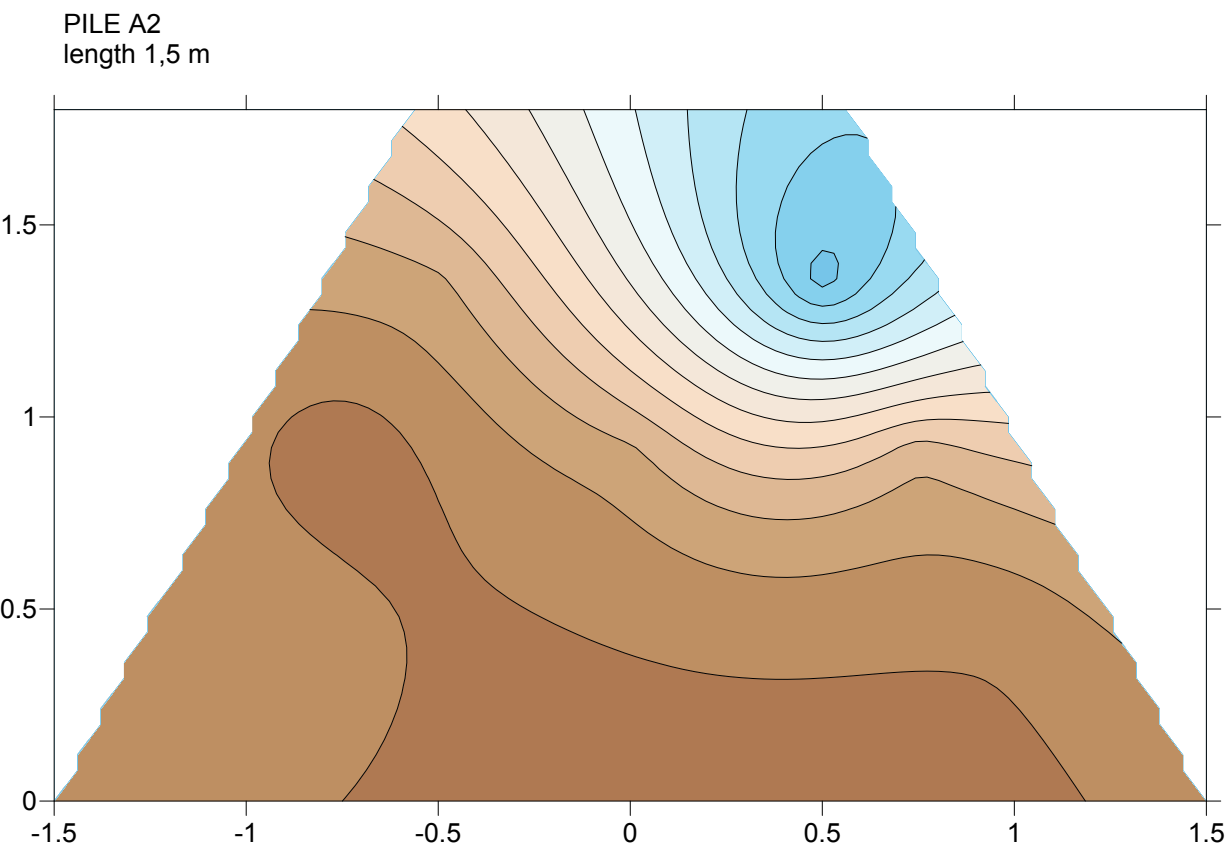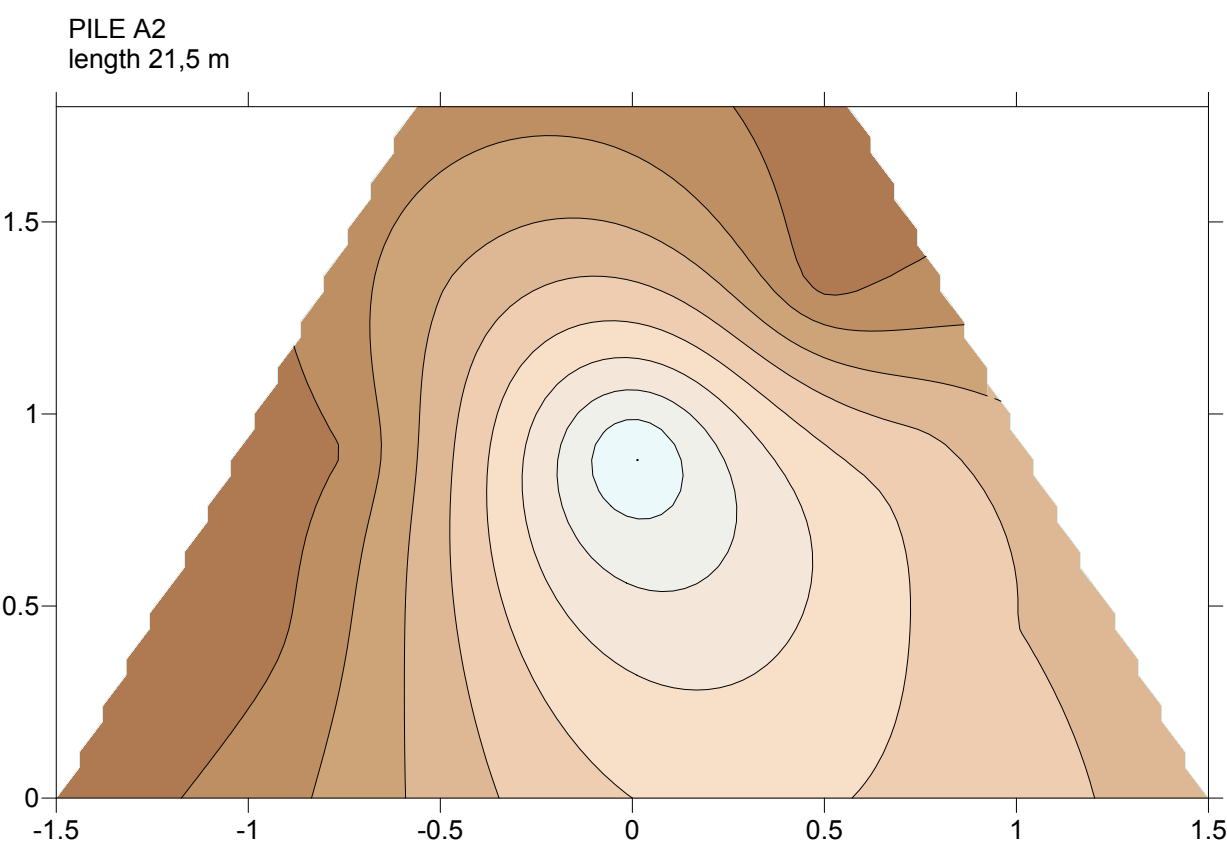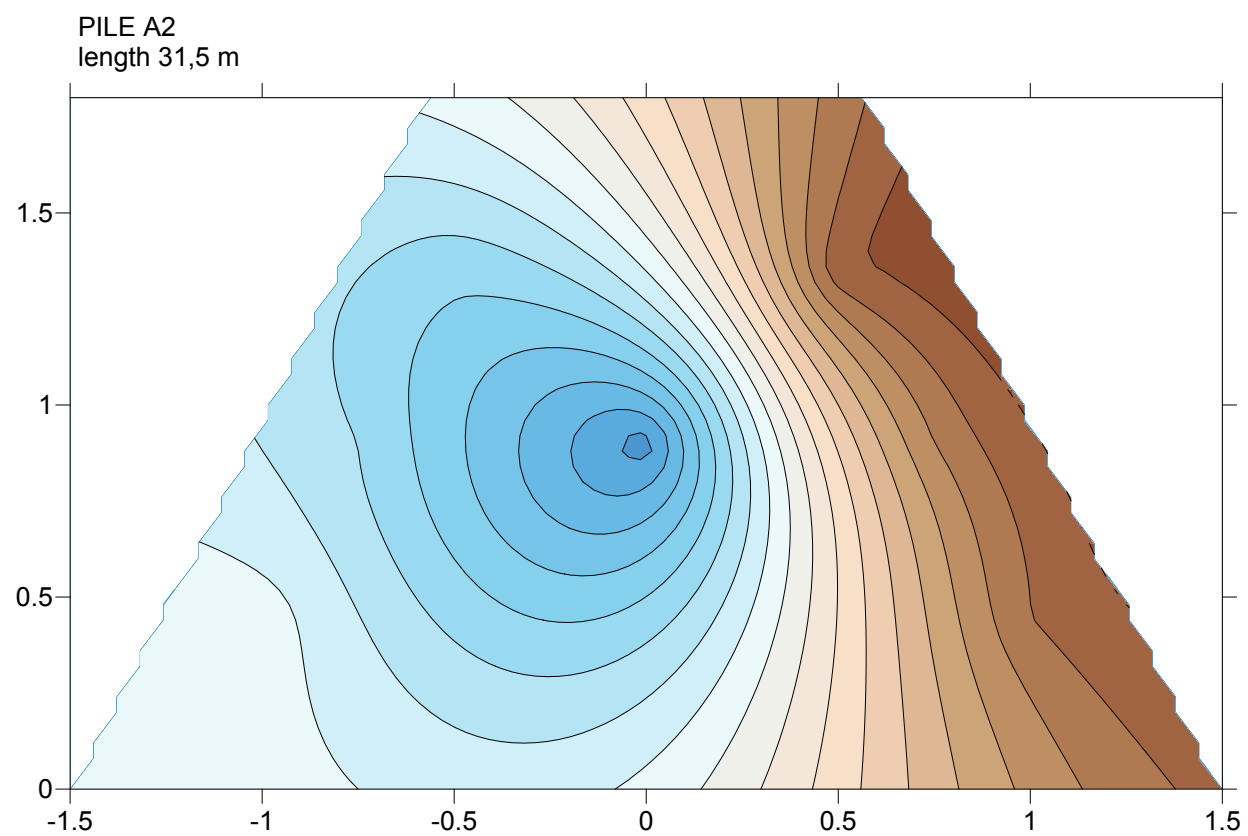

Supplement: s1 [file s1]
