# Supplementary material (part 3 of 3)
Source: MDPI journal article supplement (https://www.mdpi.com/2306-5729/4/1/37)

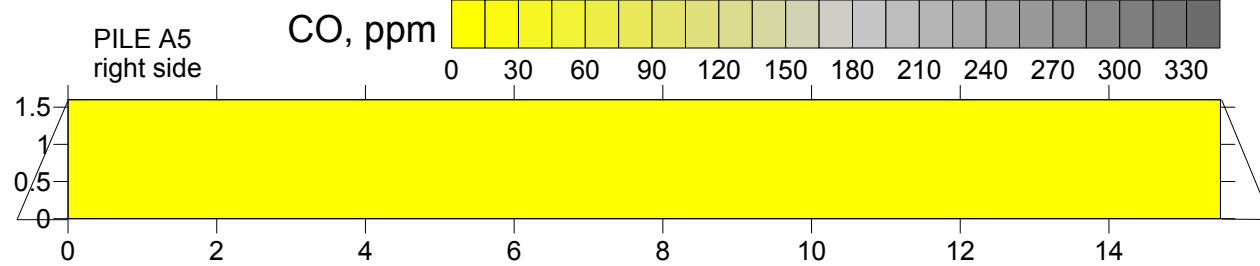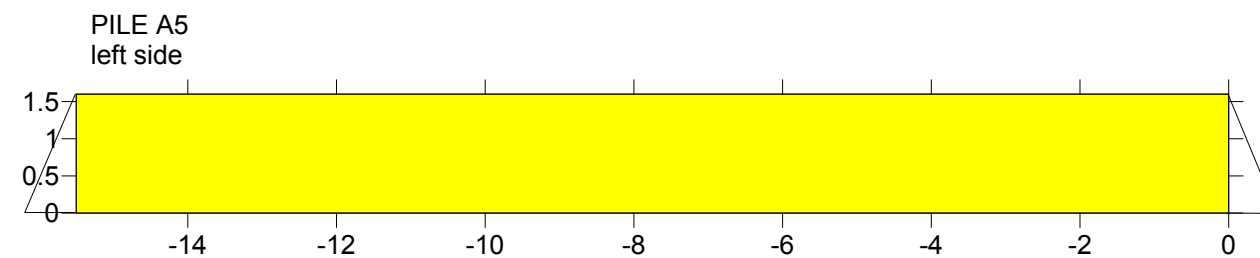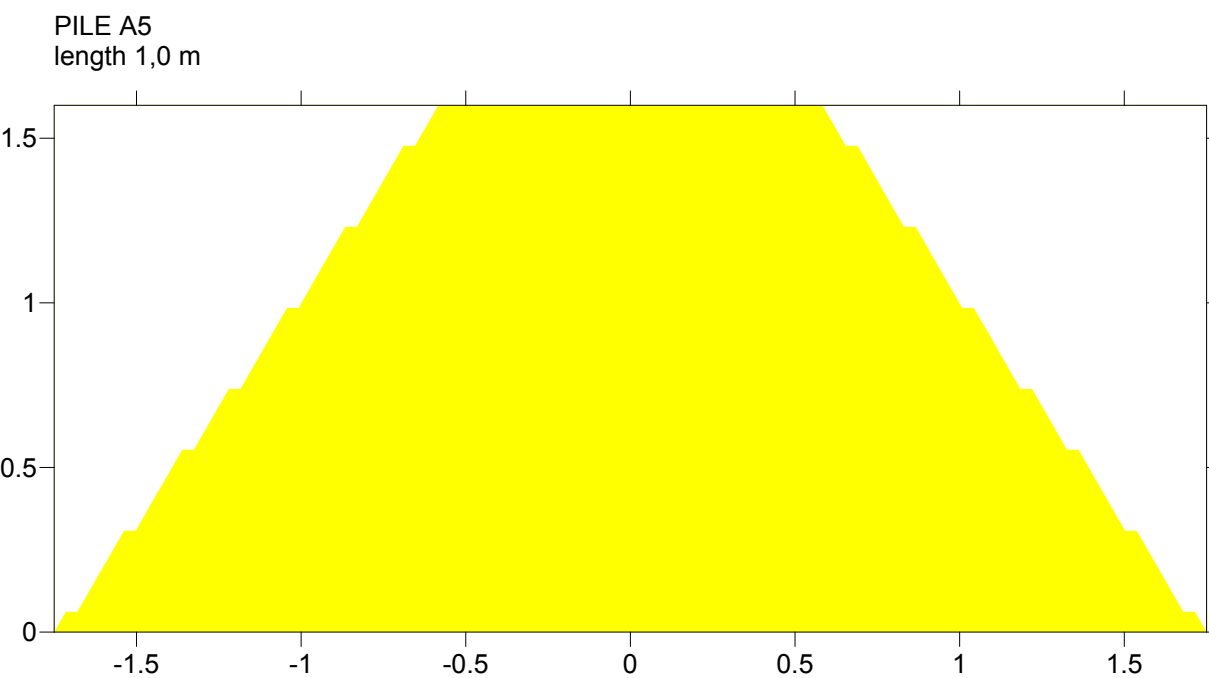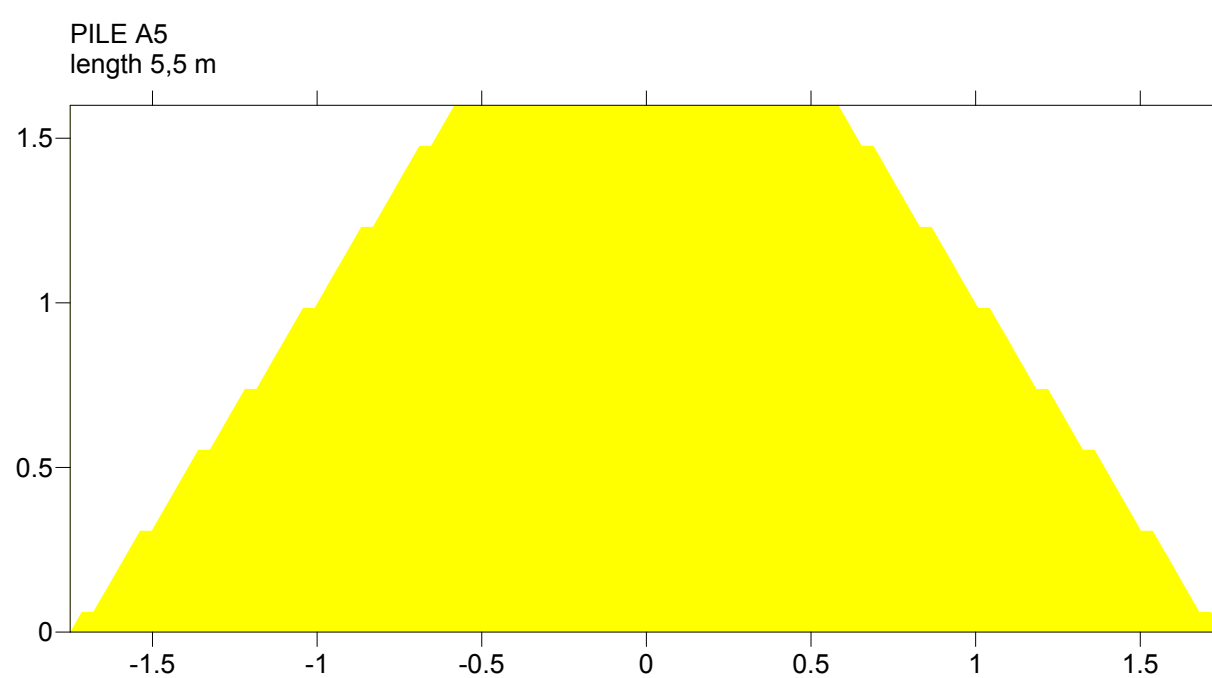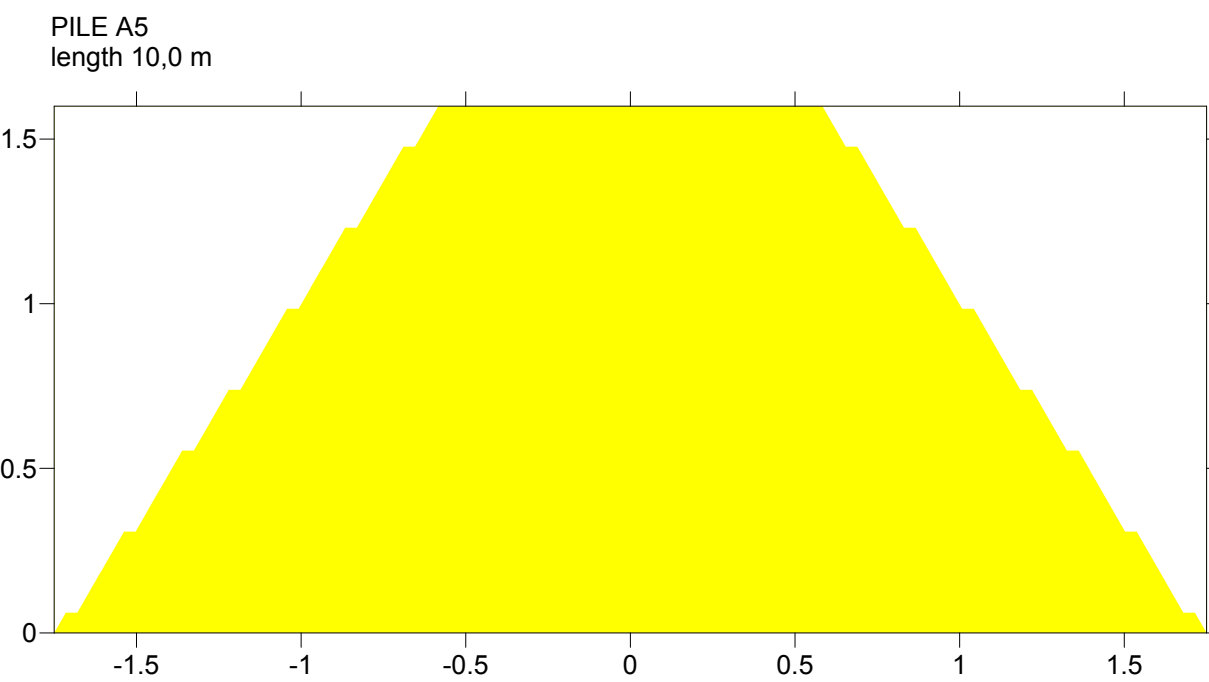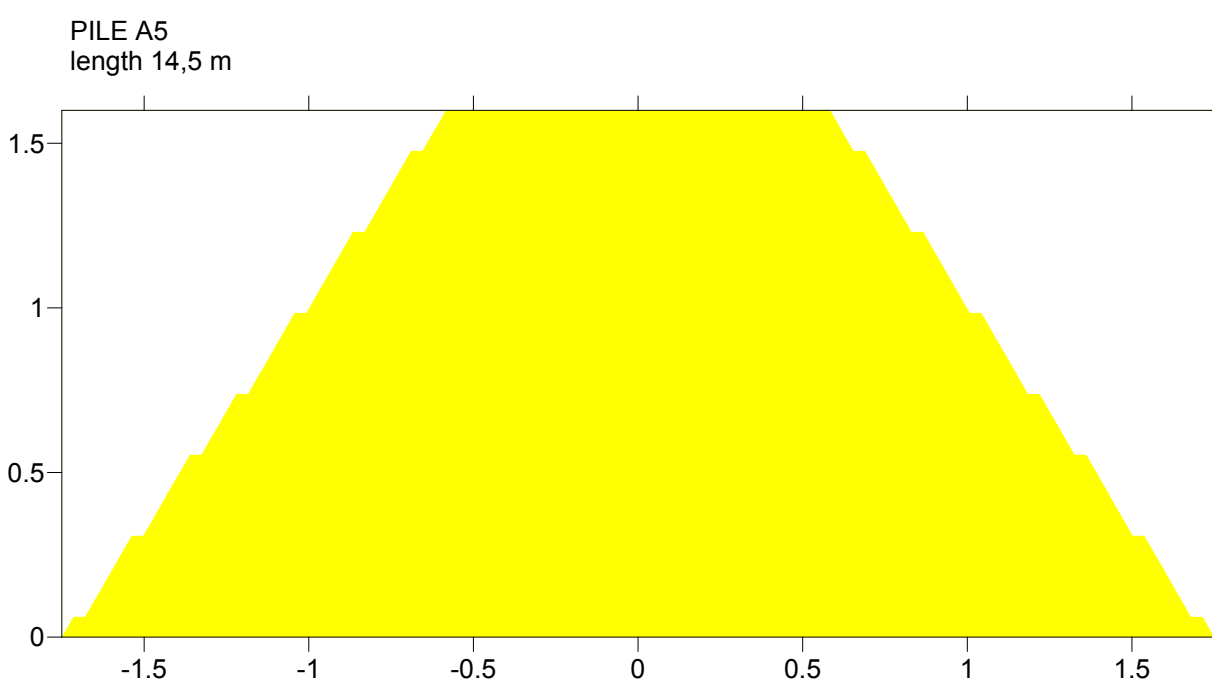

Supplement: s1 [file s1]

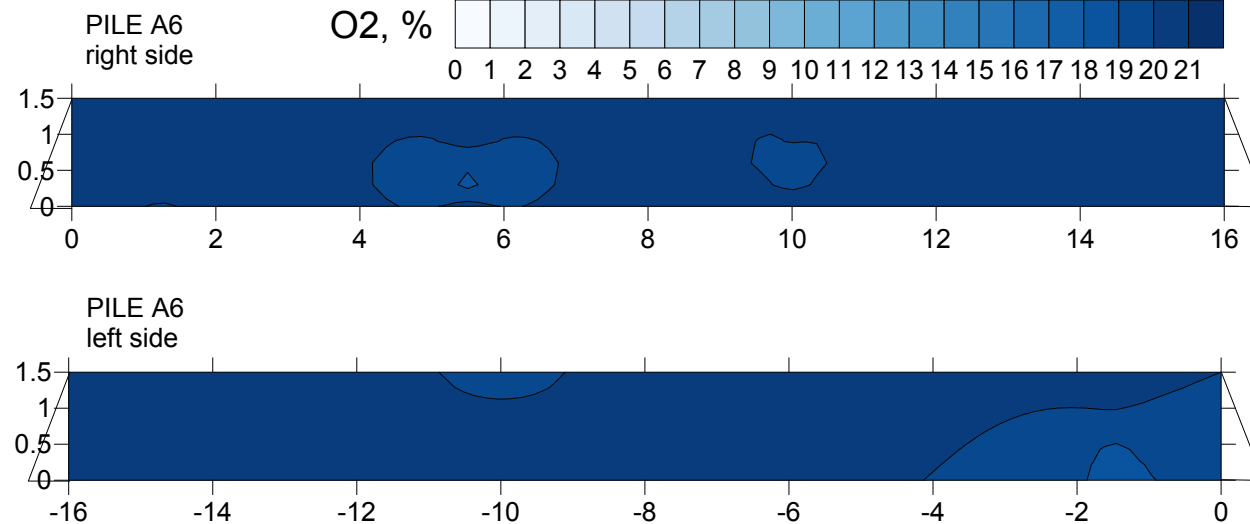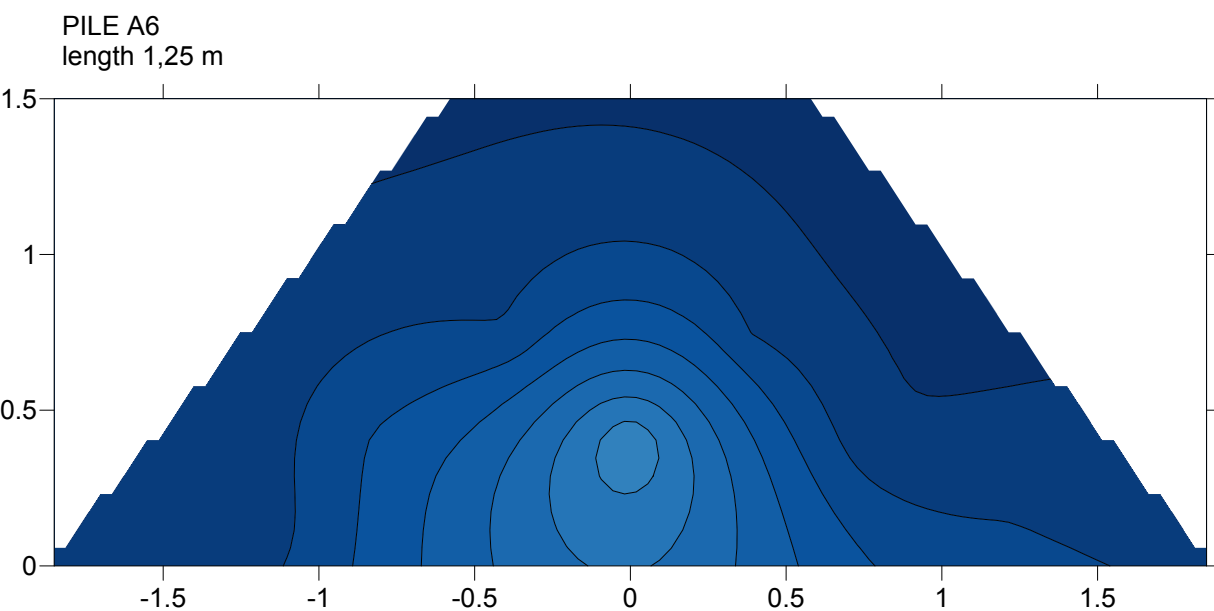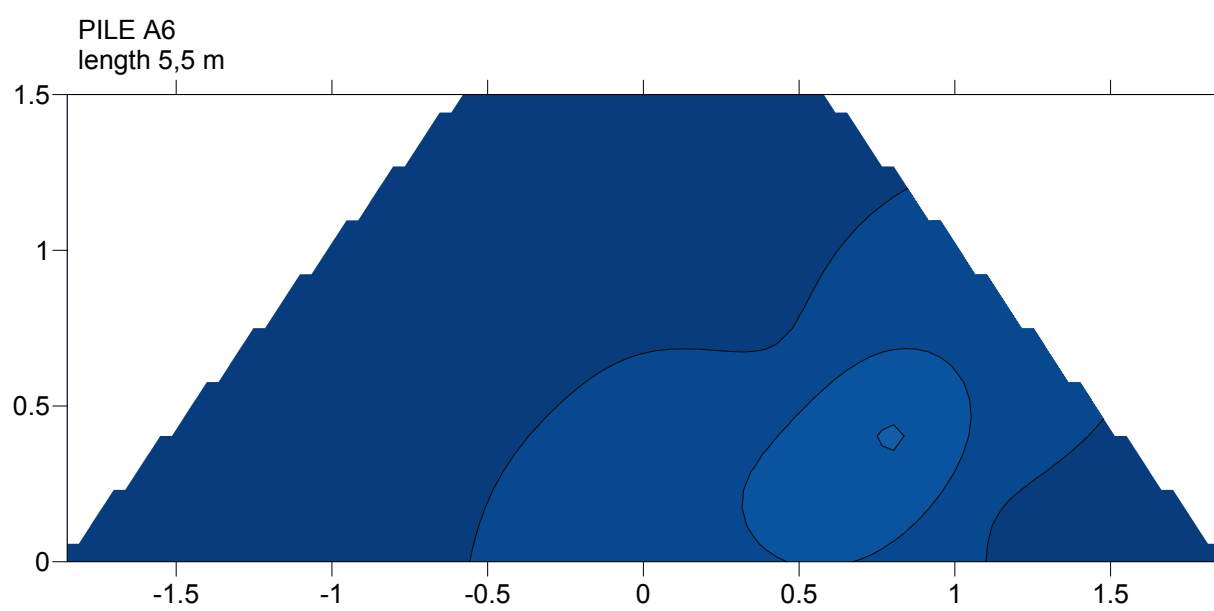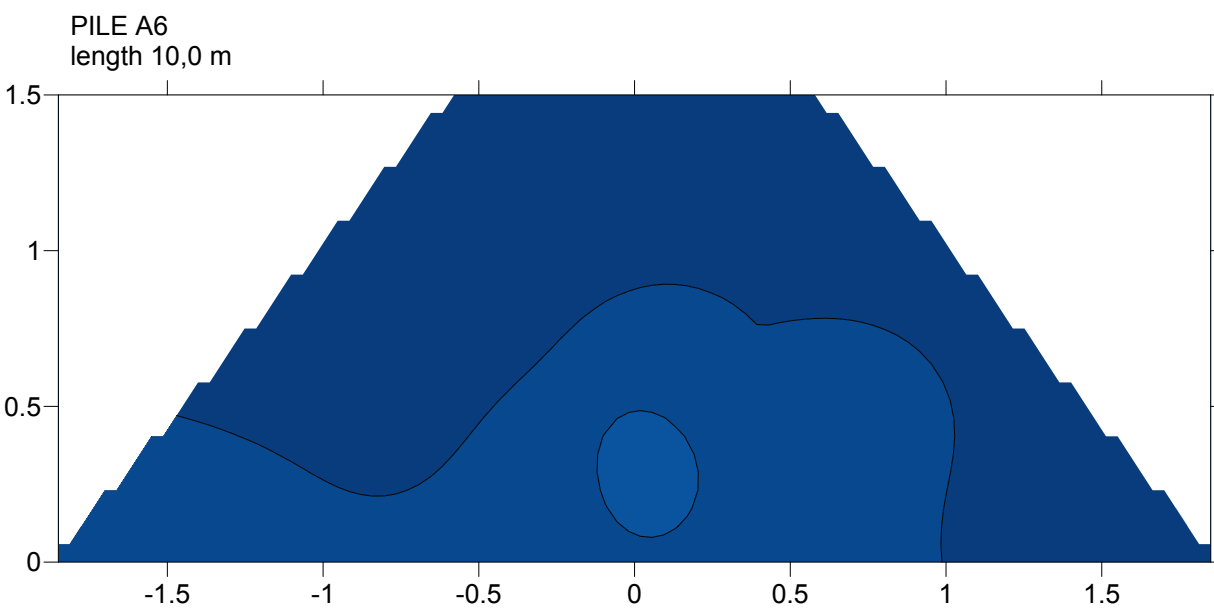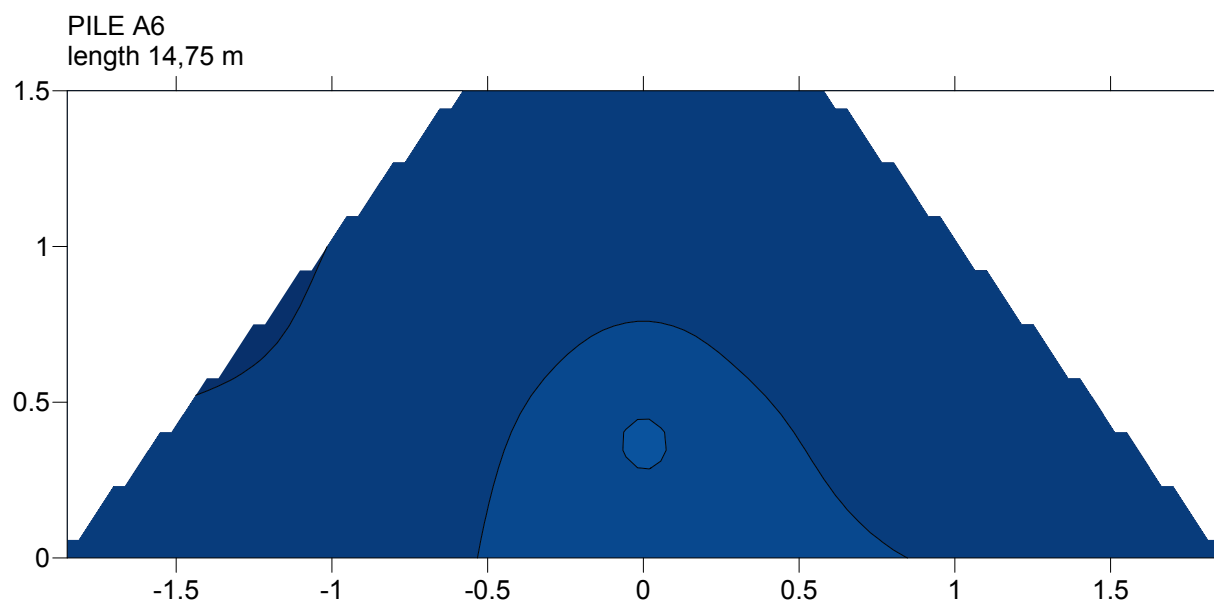

Supplement: s1 [file s1]

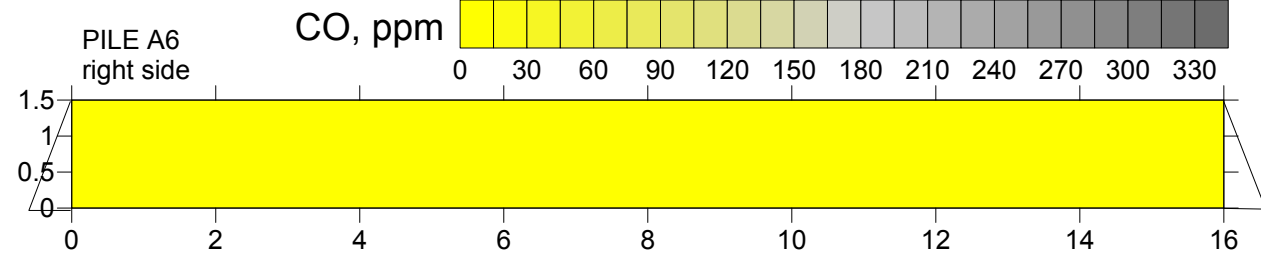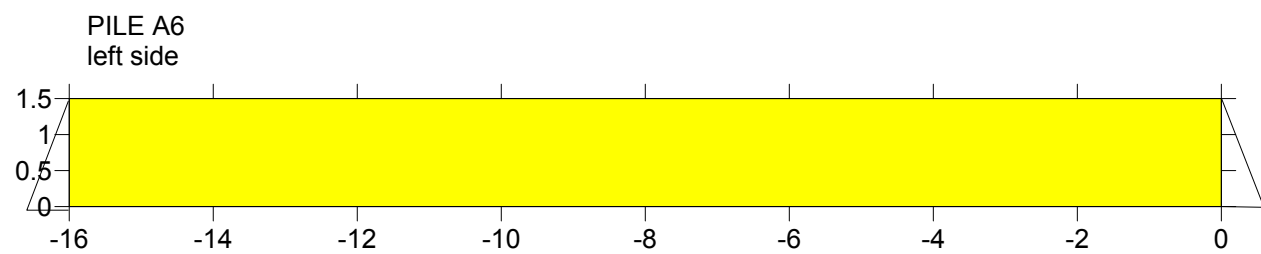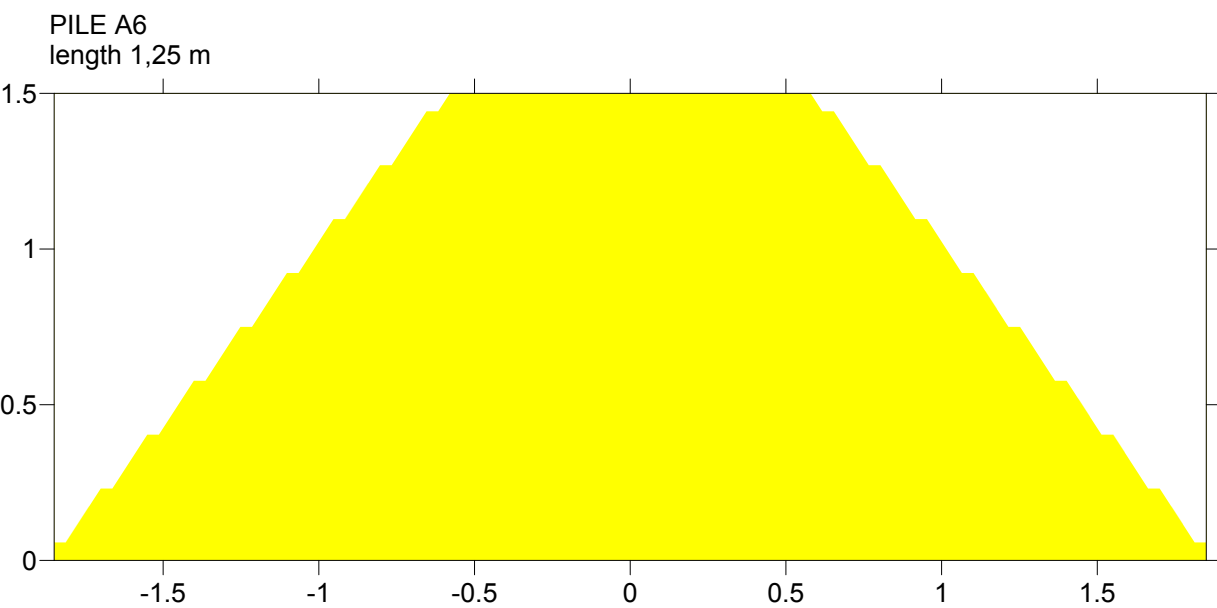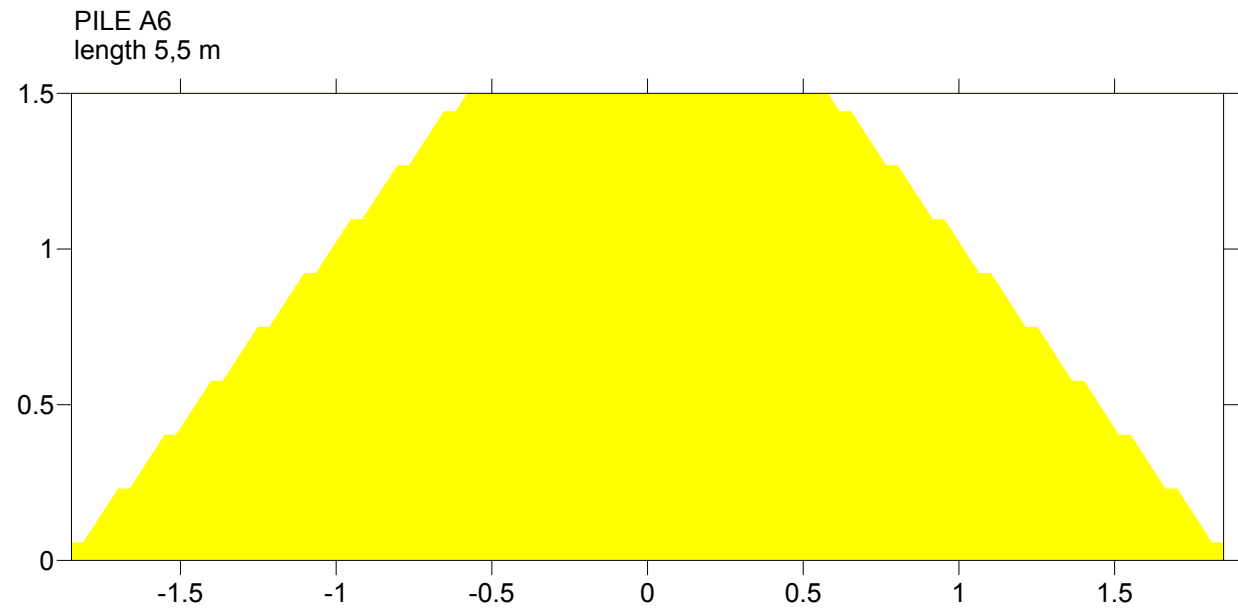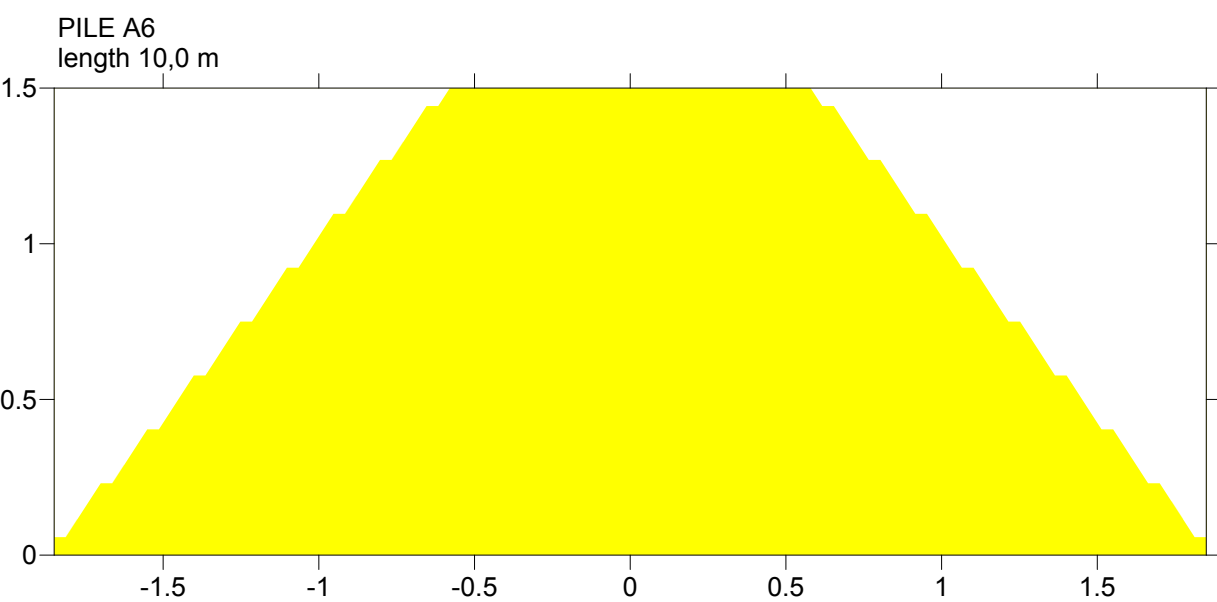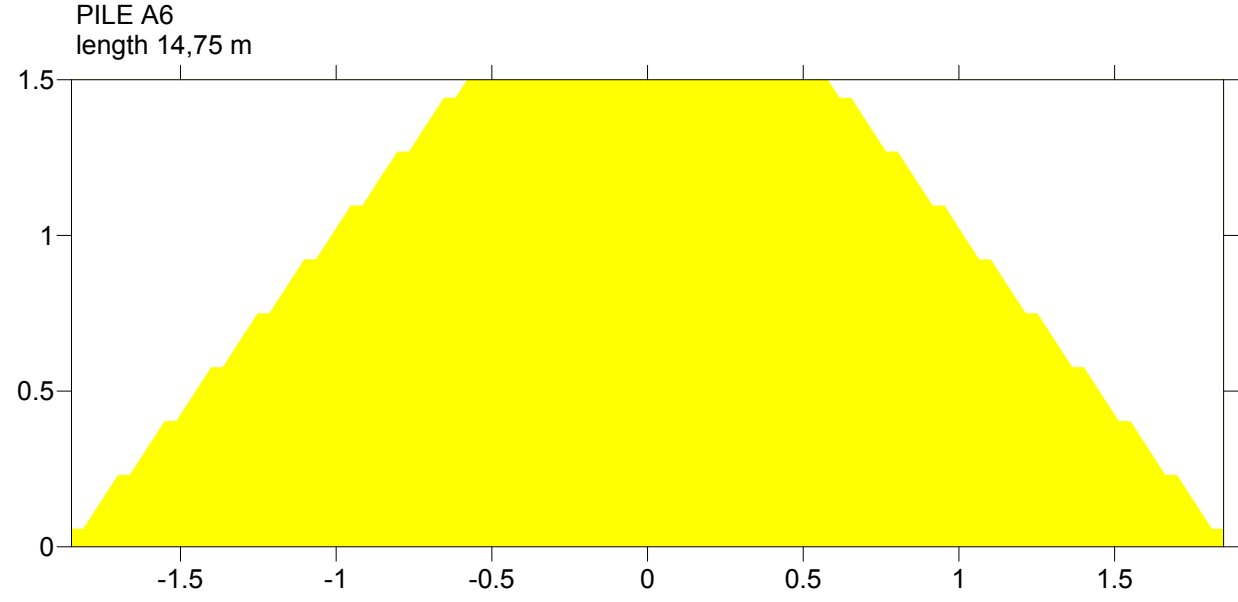

Supplement: s1 [file s1]

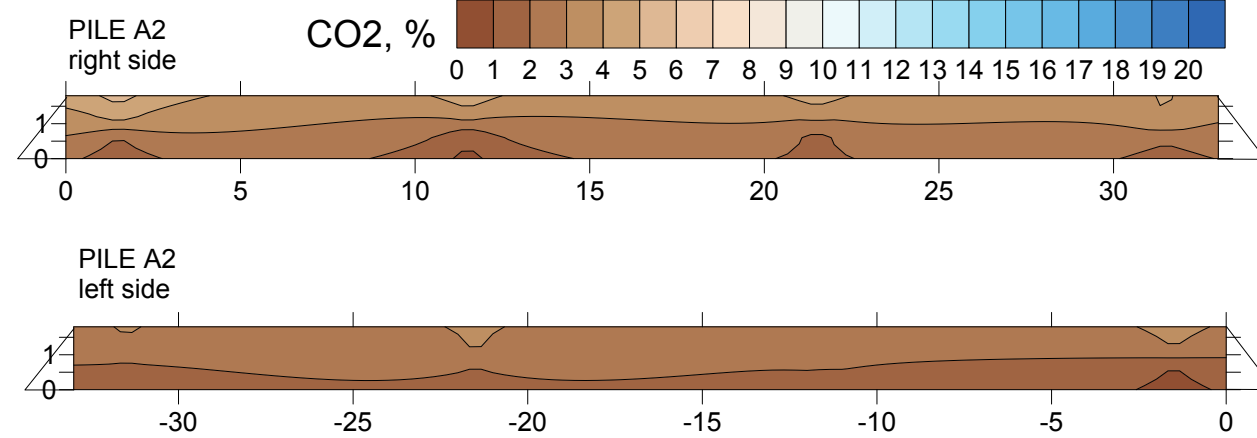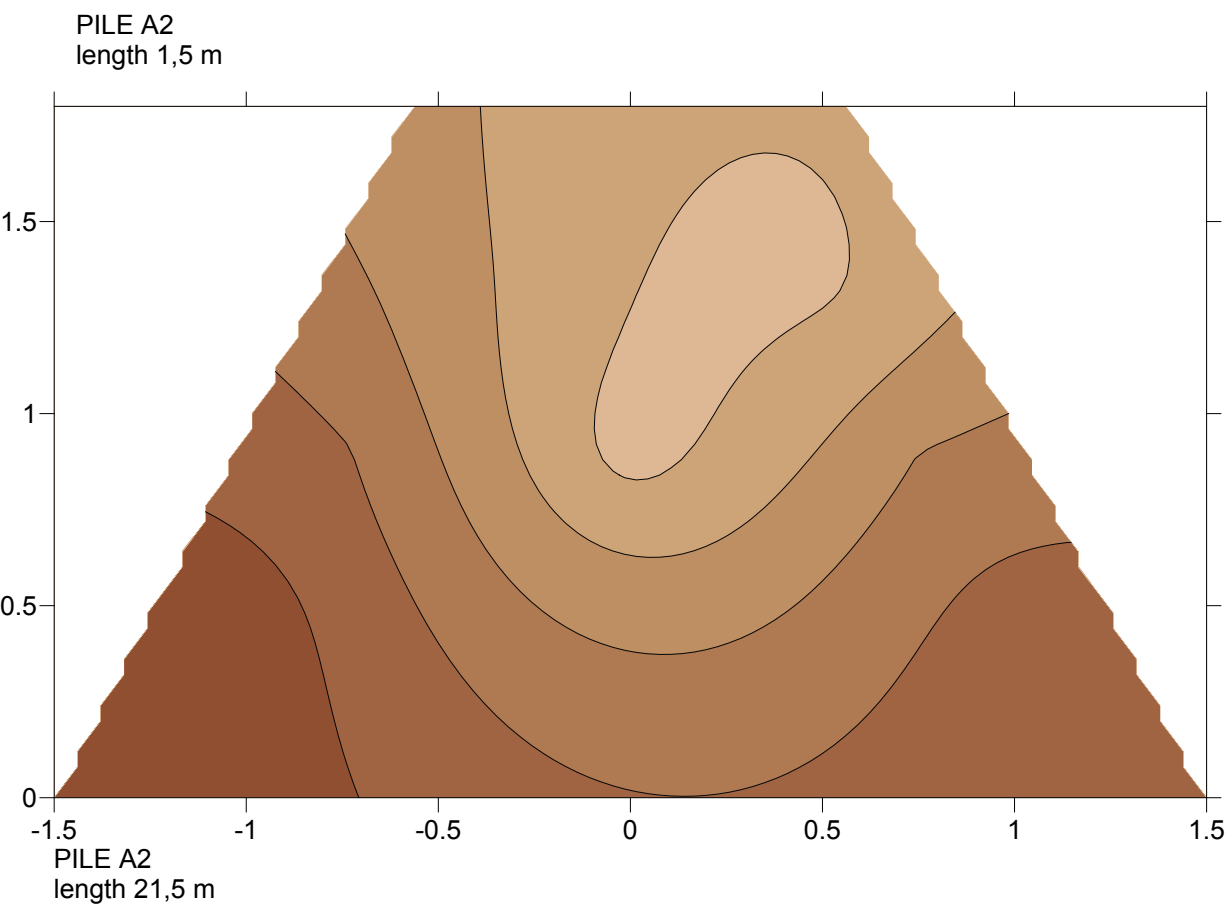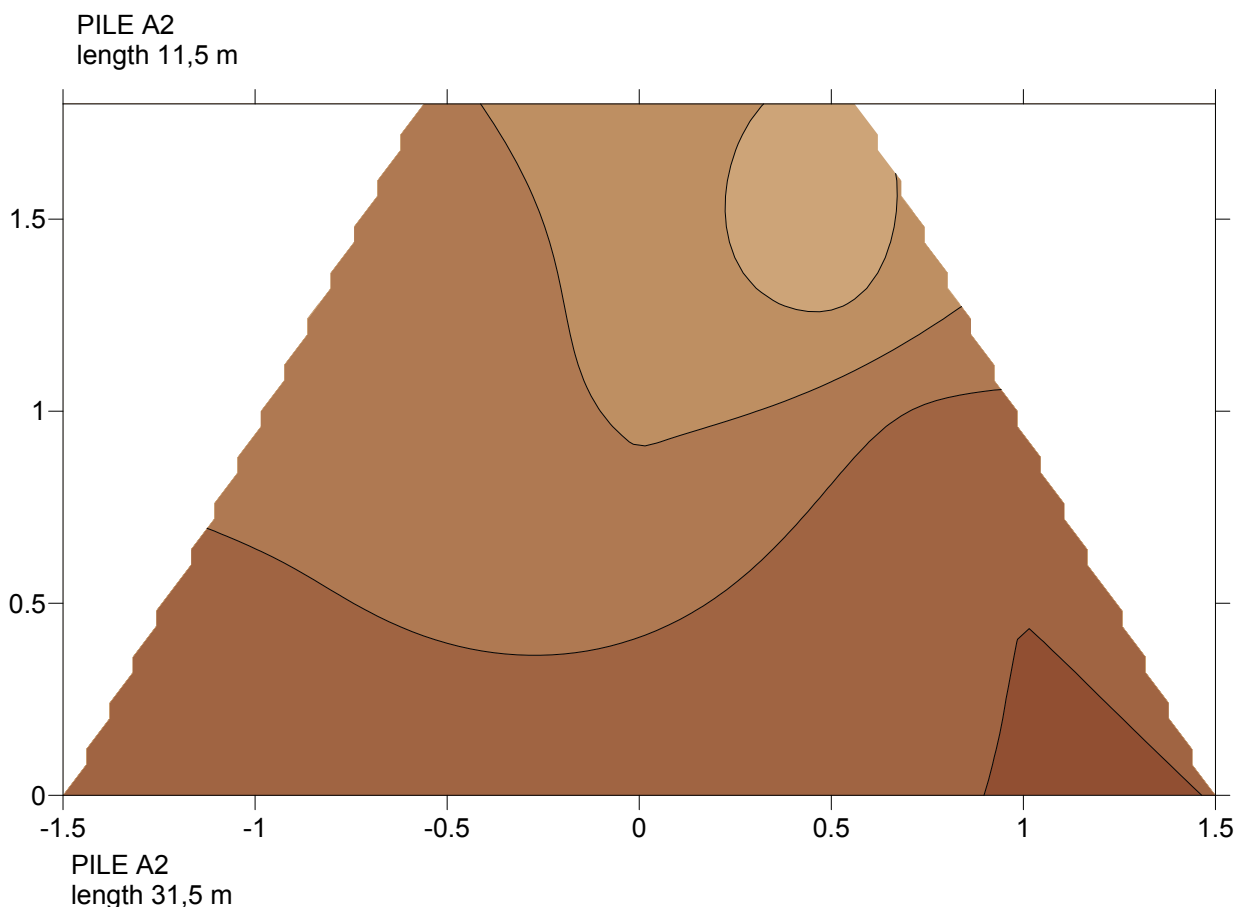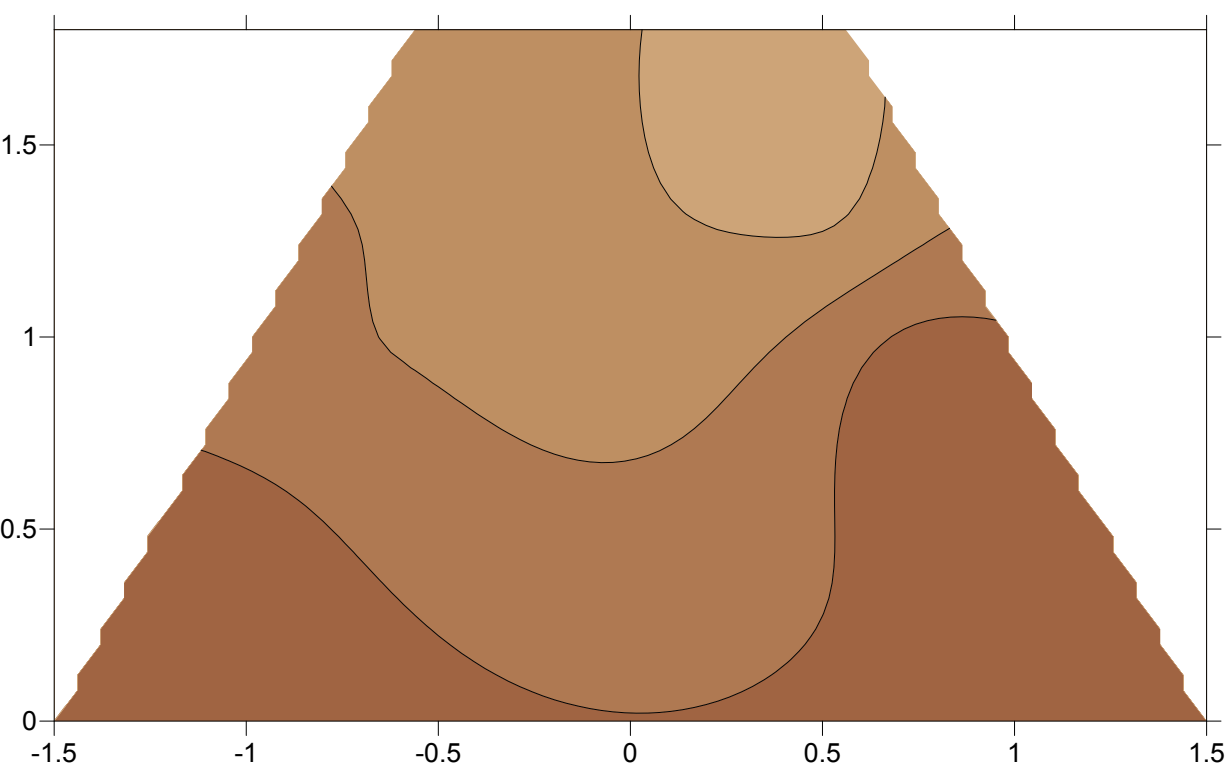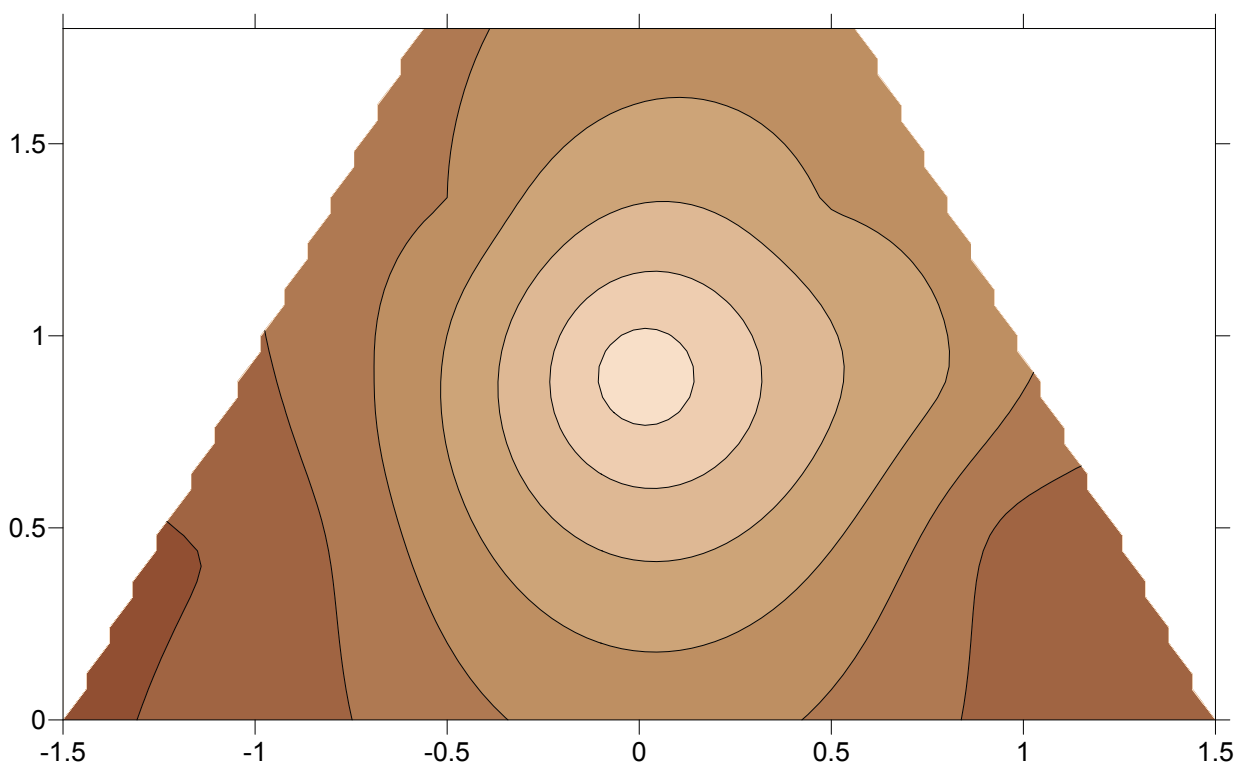

Supplement: s1 [file s1]

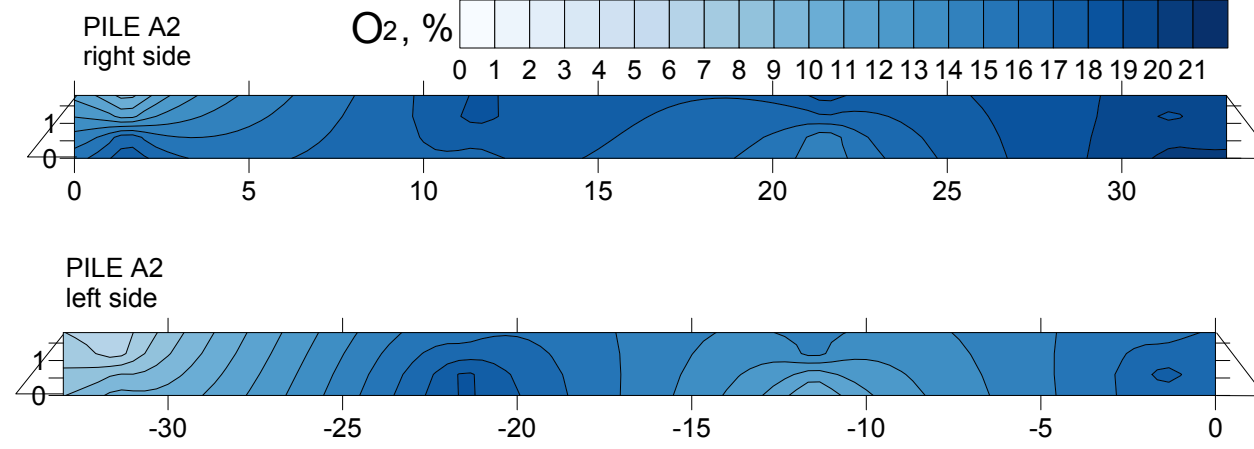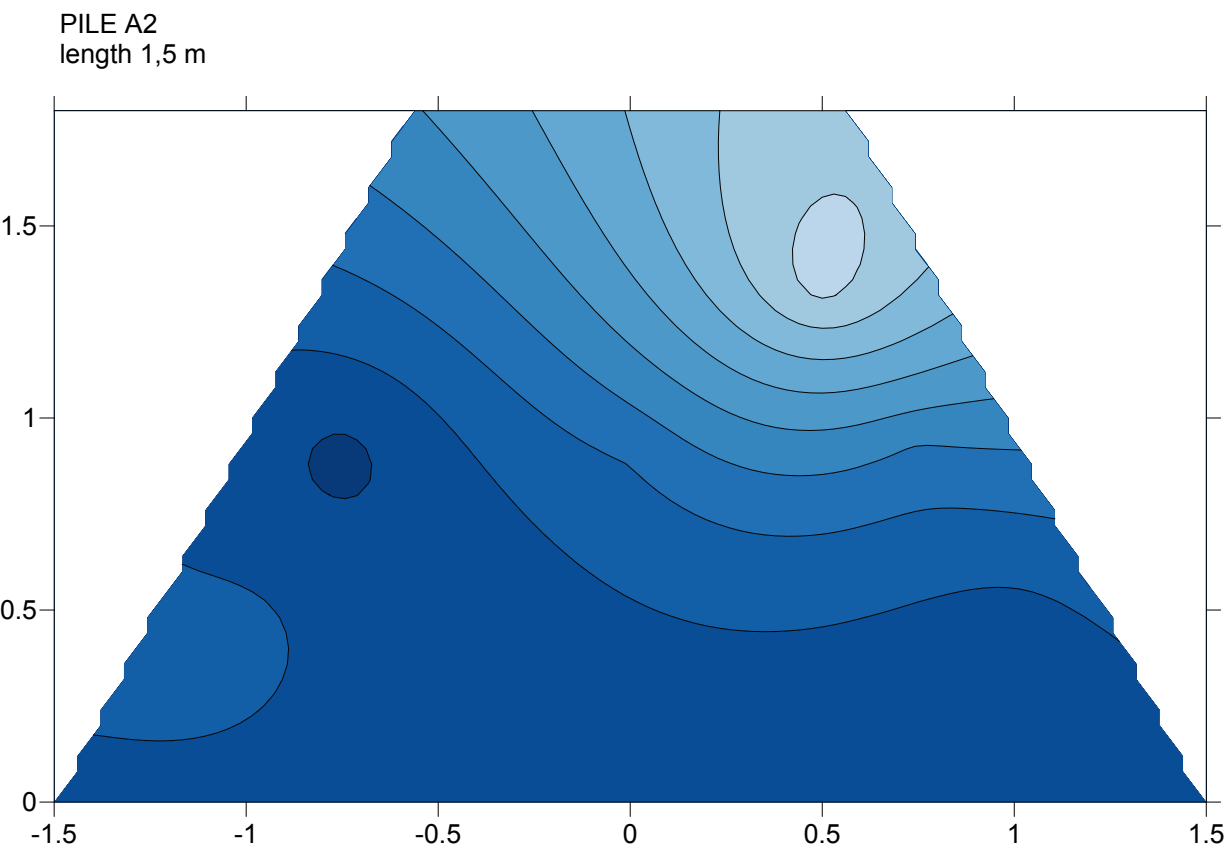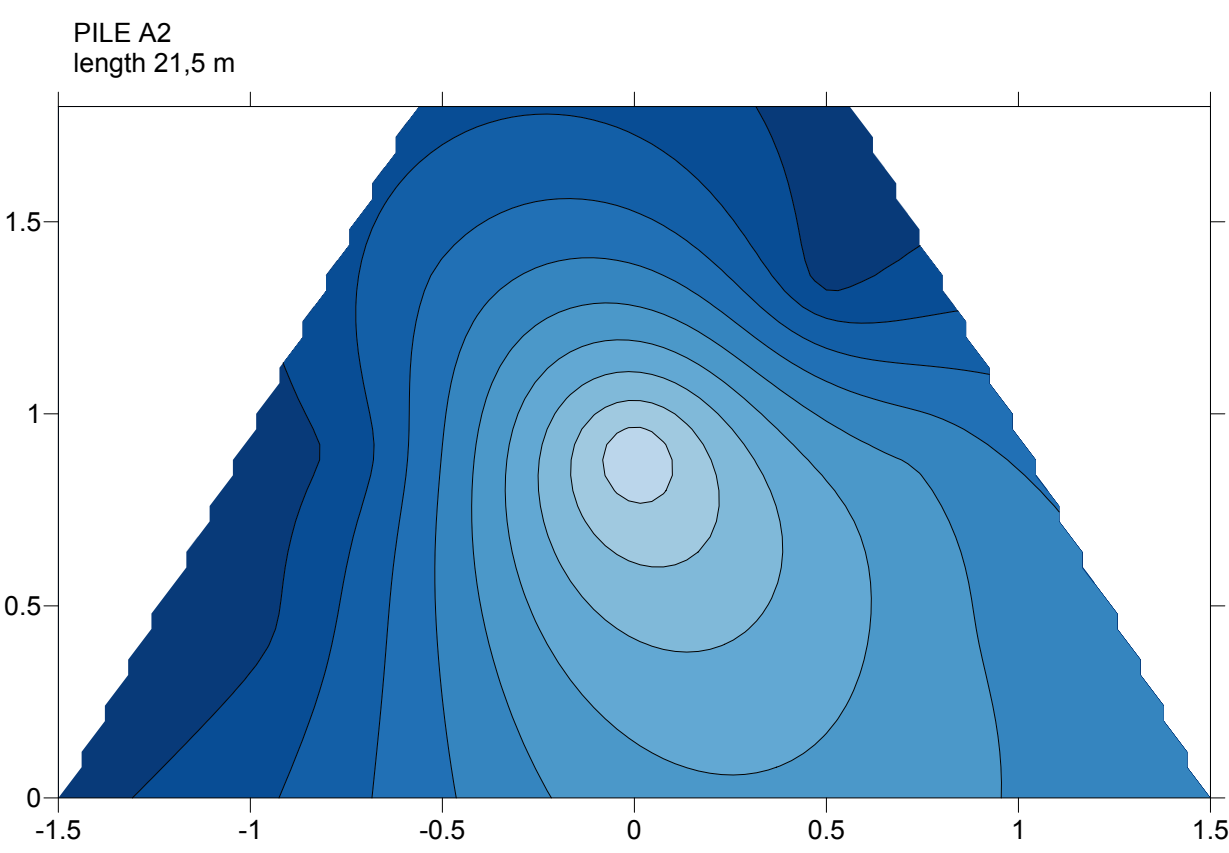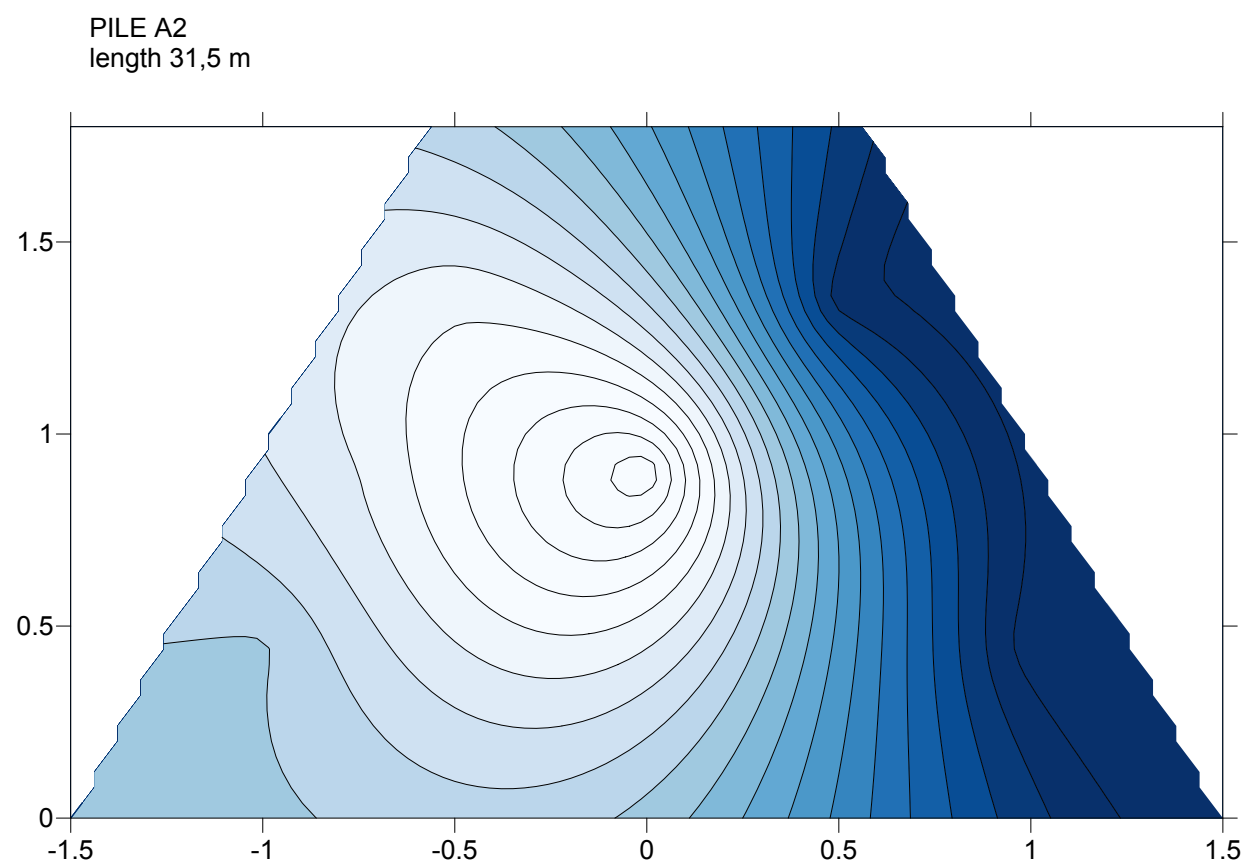

Supplement: s1 [file s1]

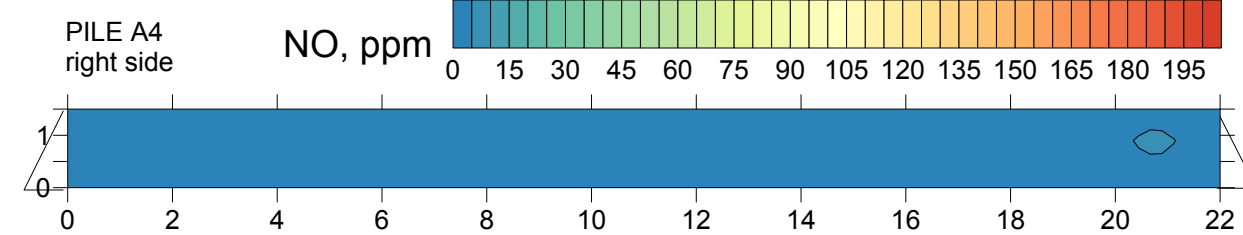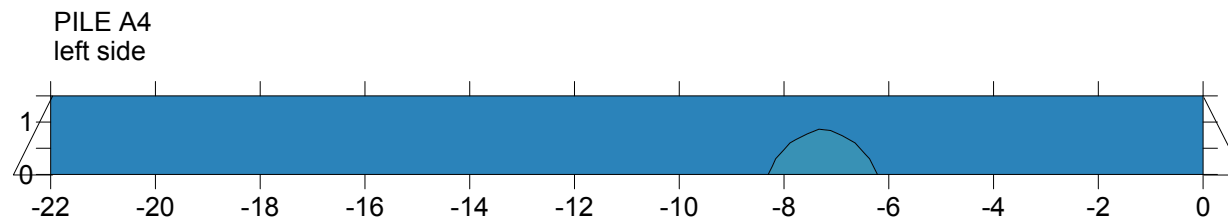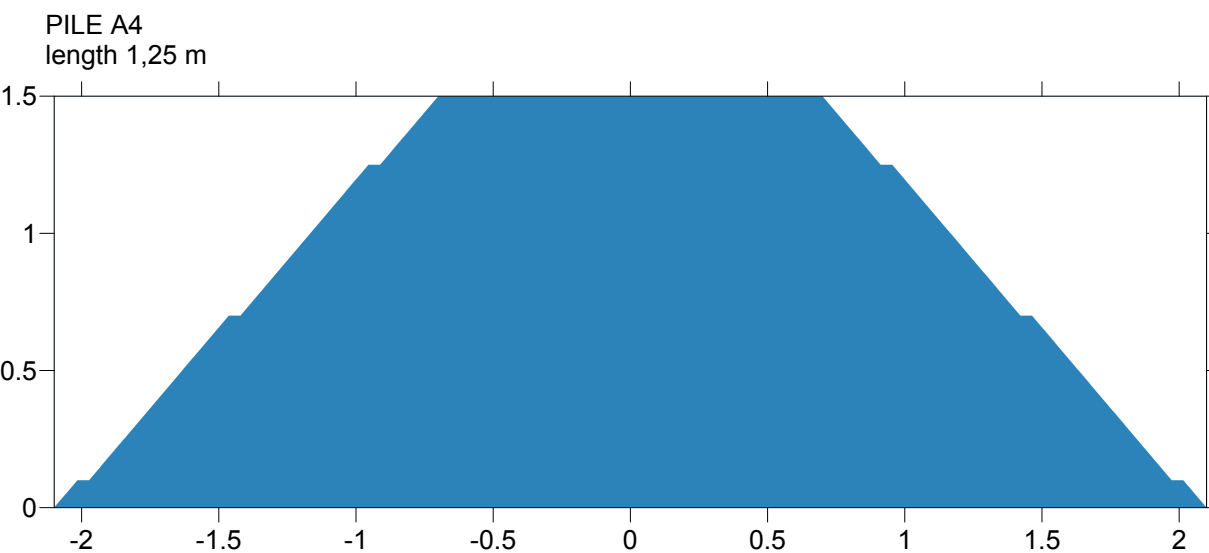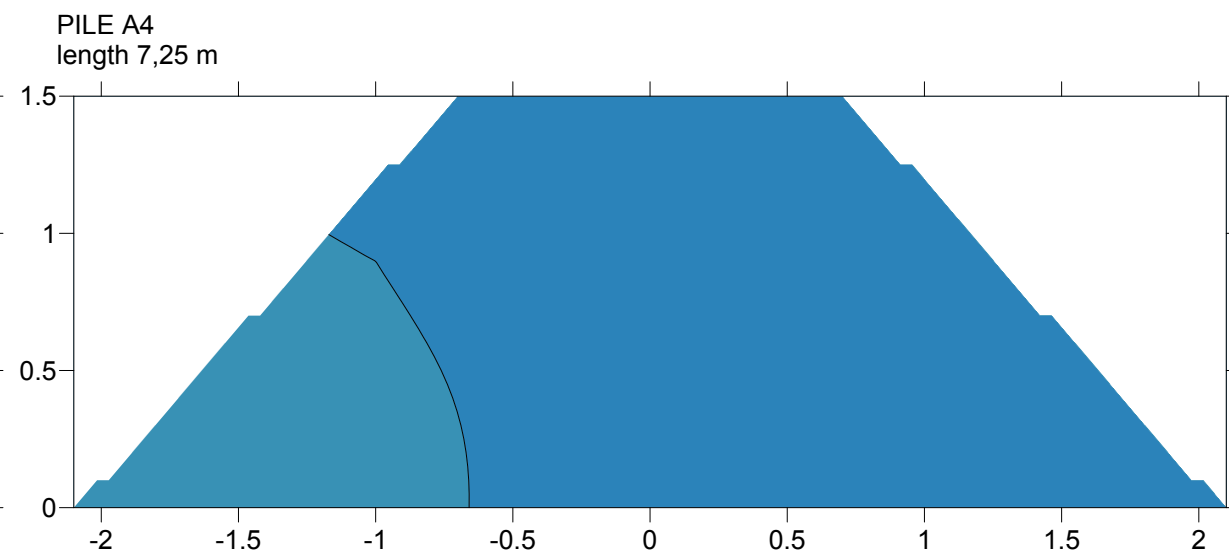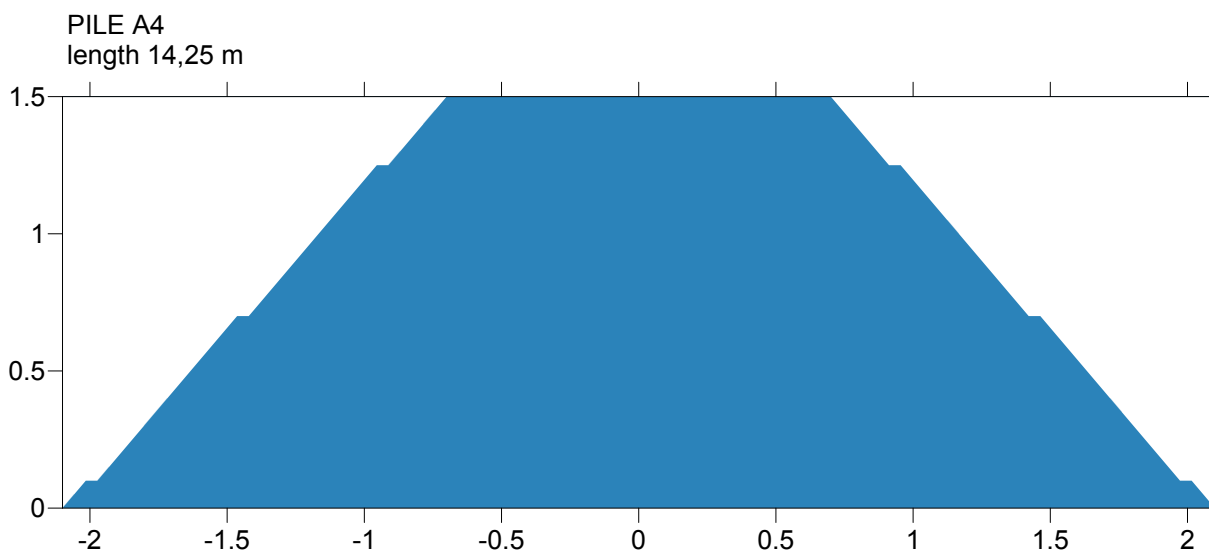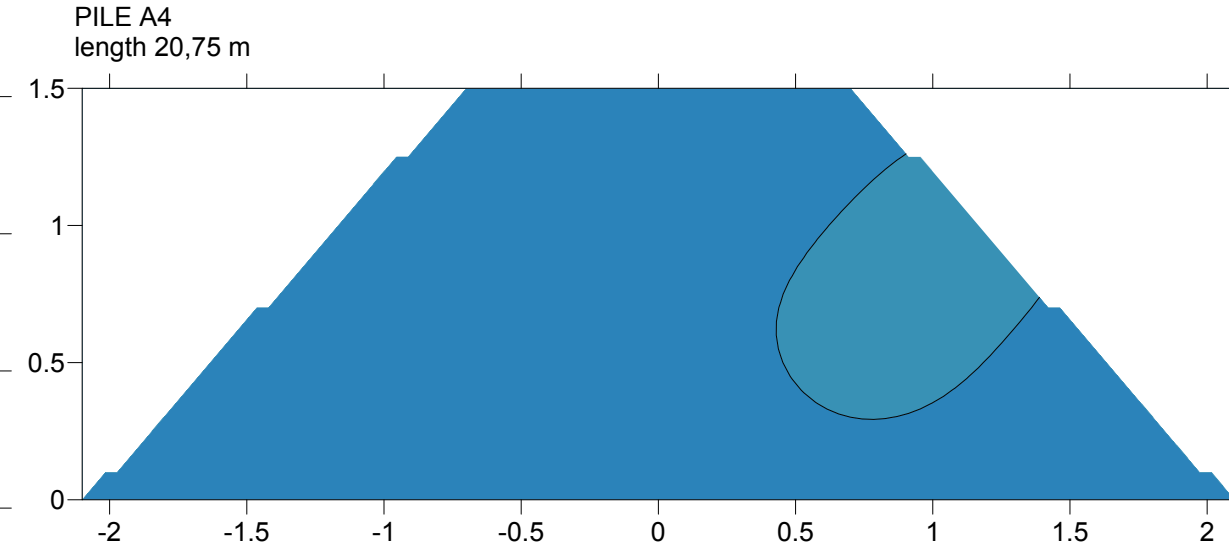

Supplement: s1 [file s1]

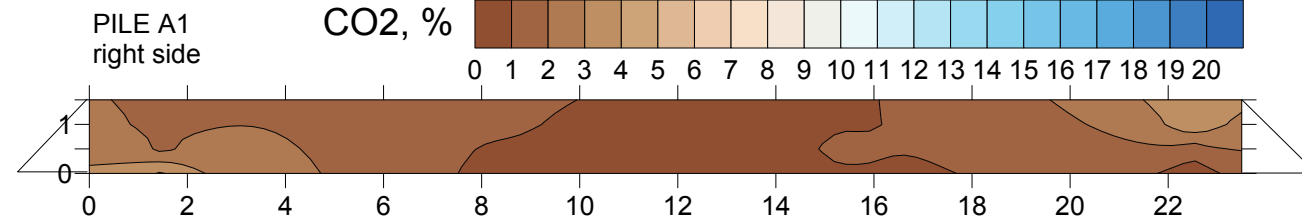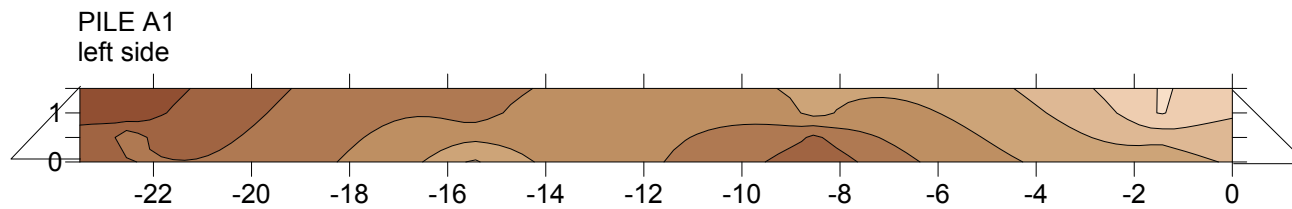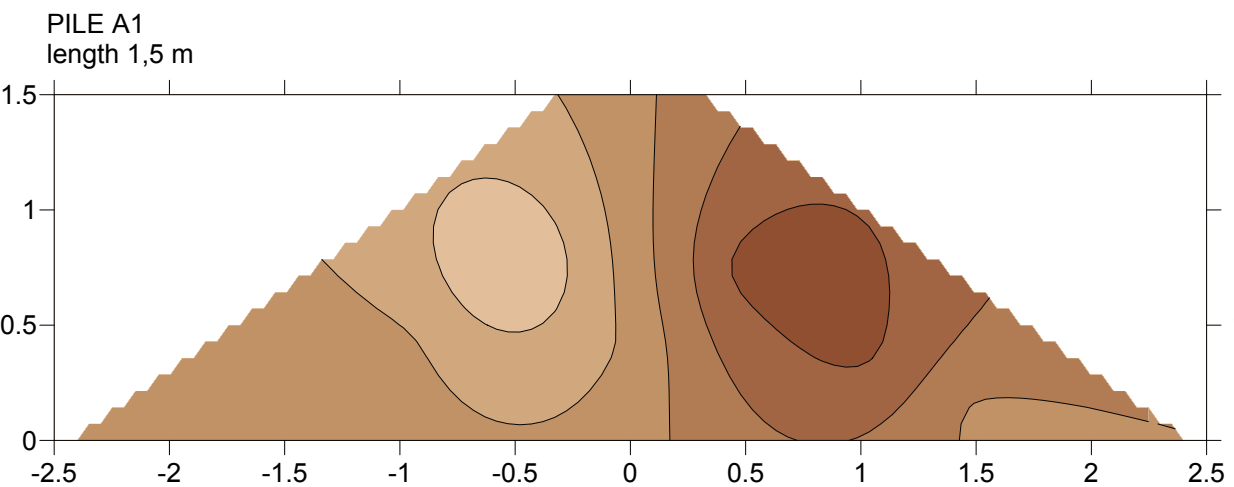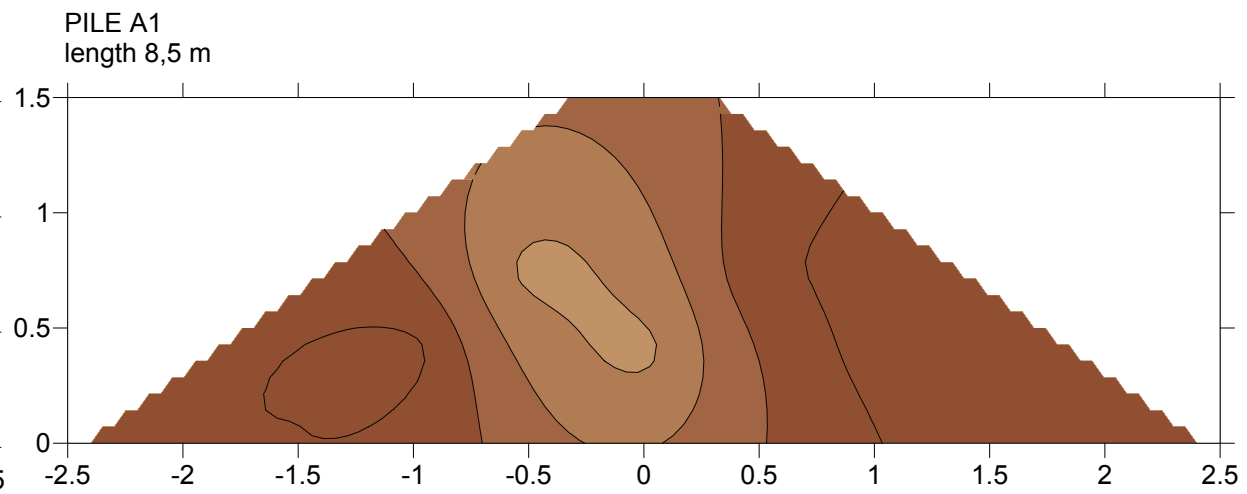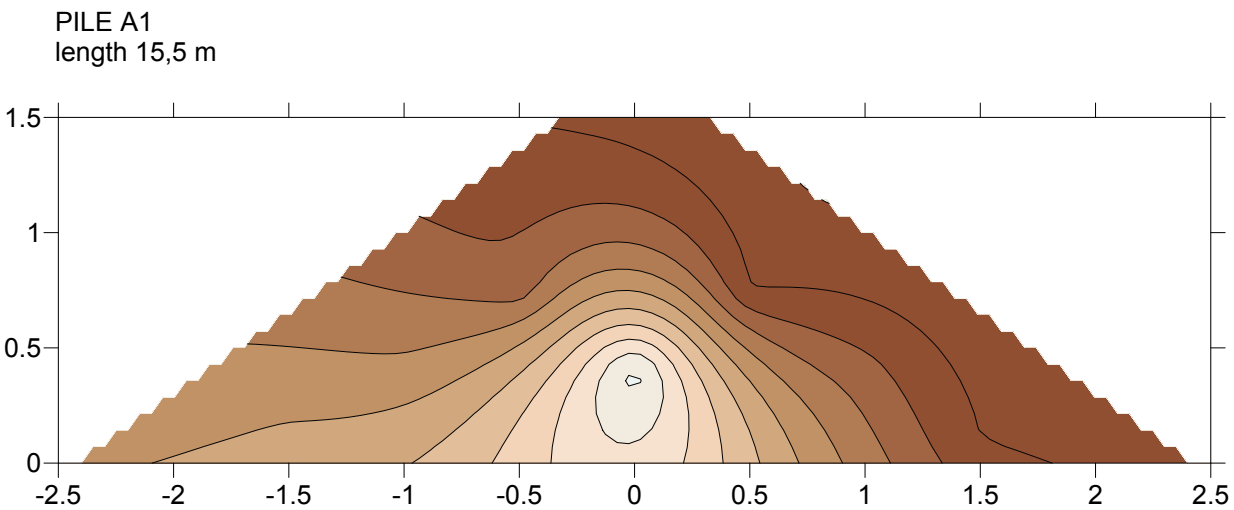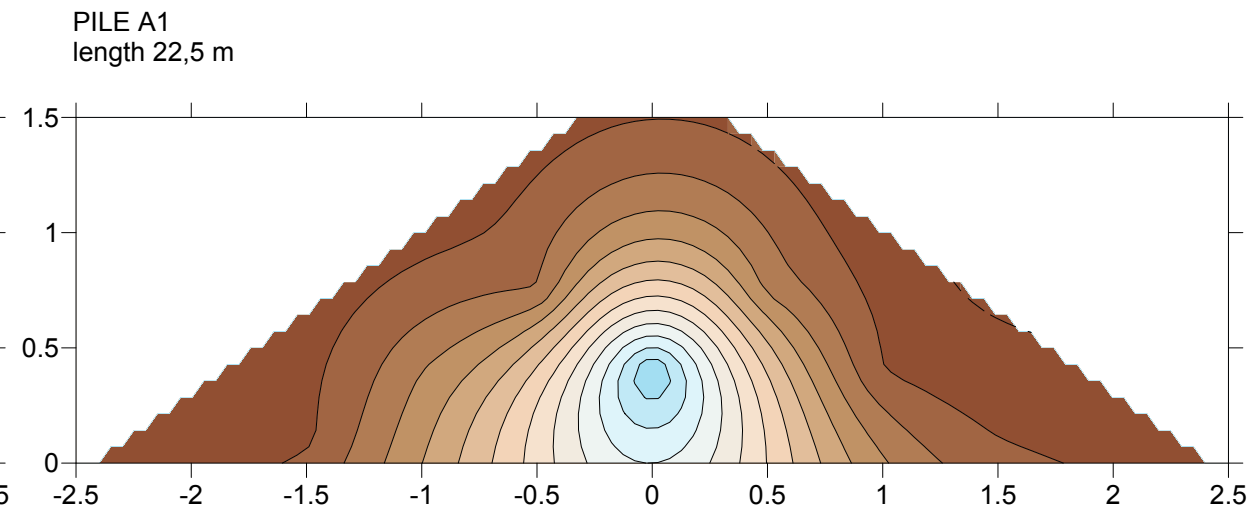

Supplement: s1 [file s1]

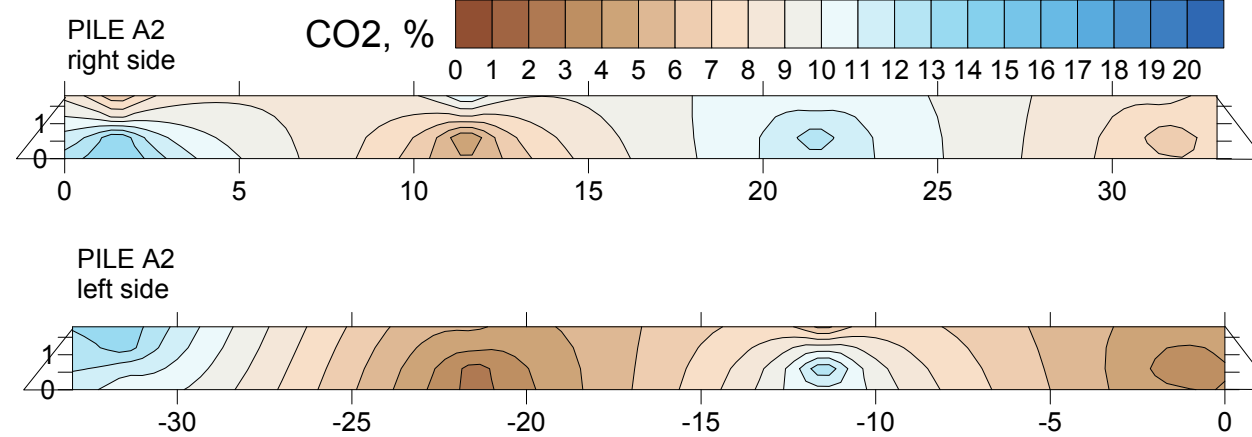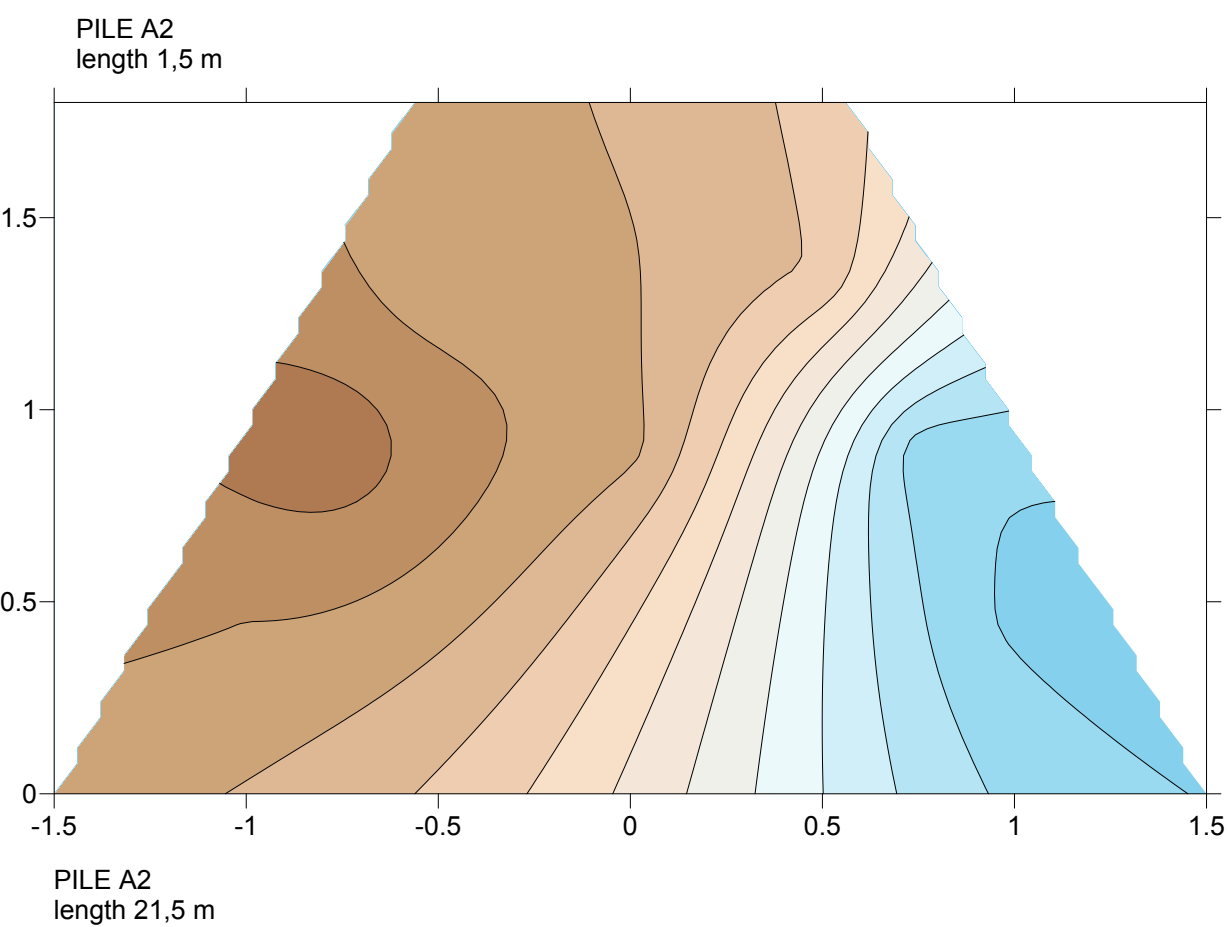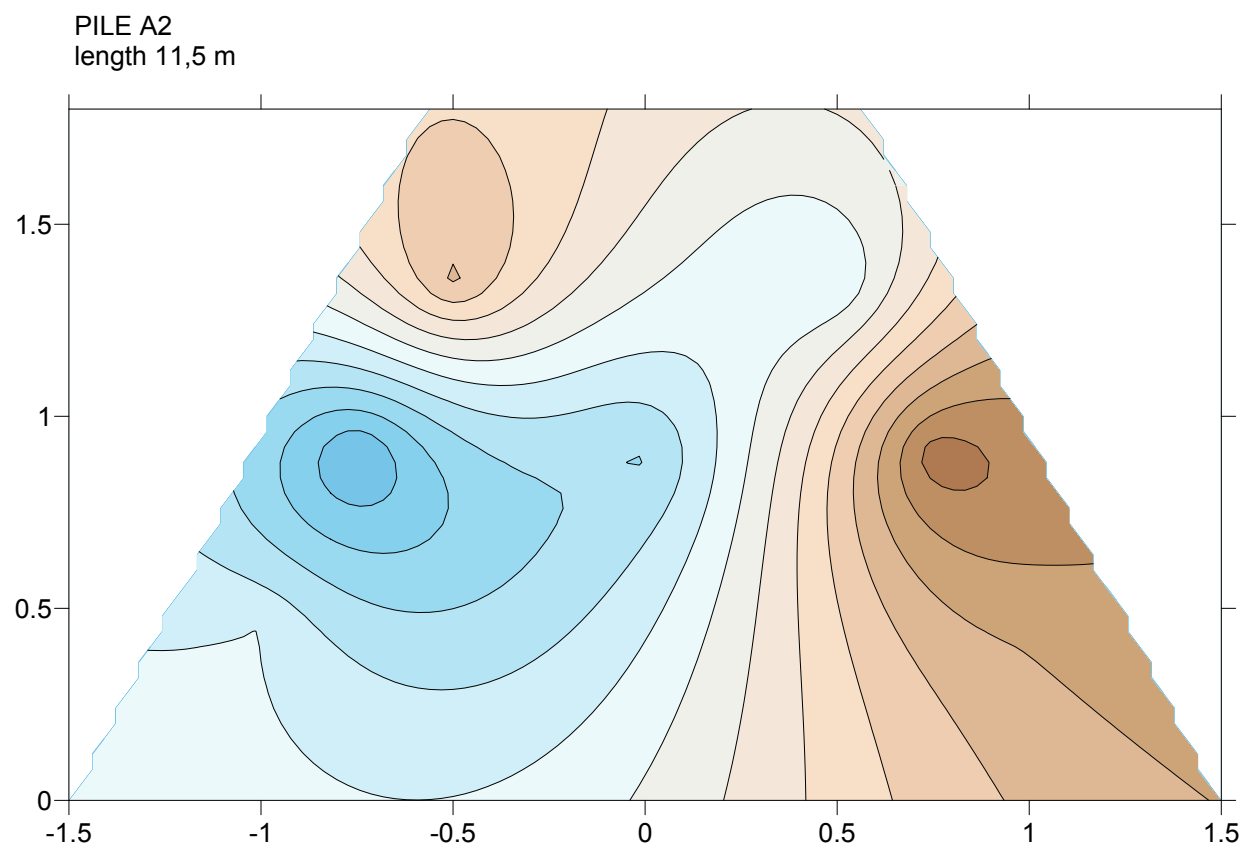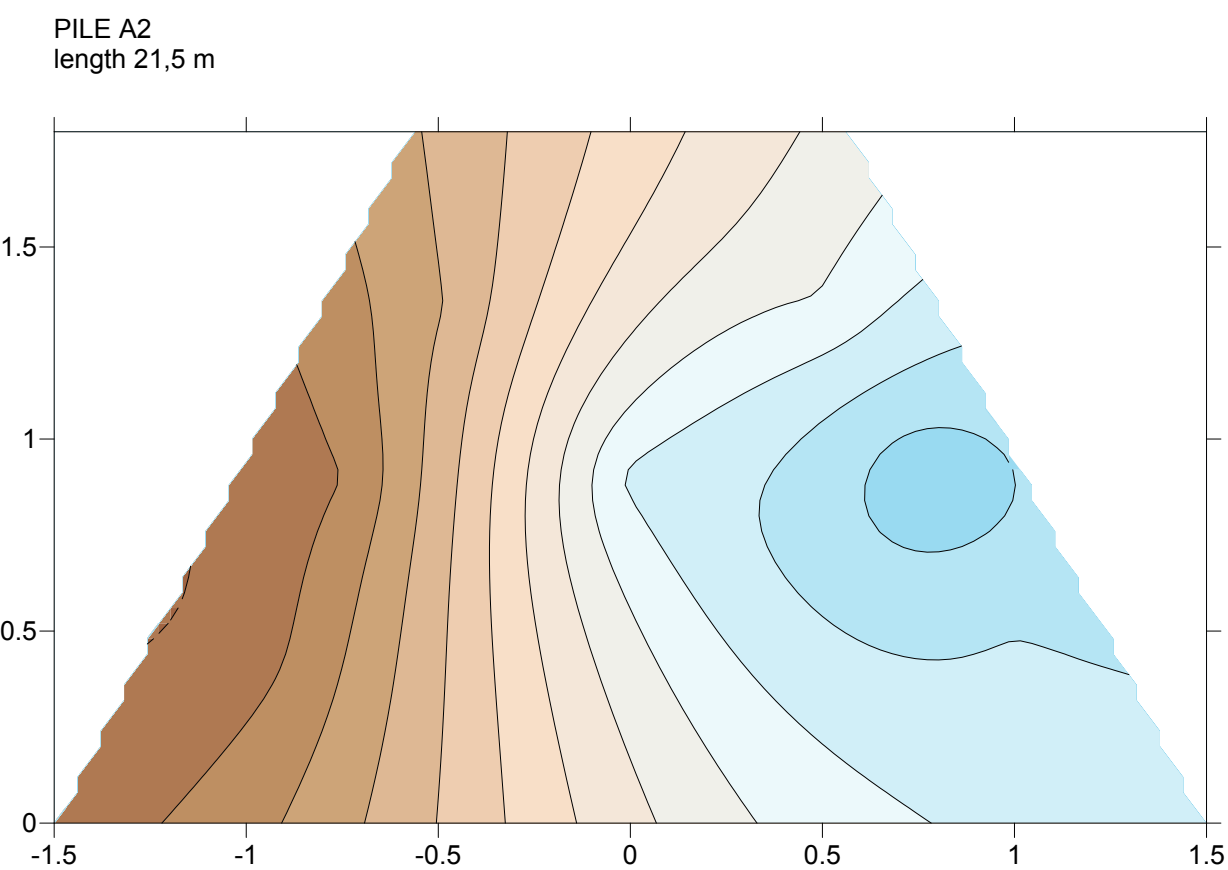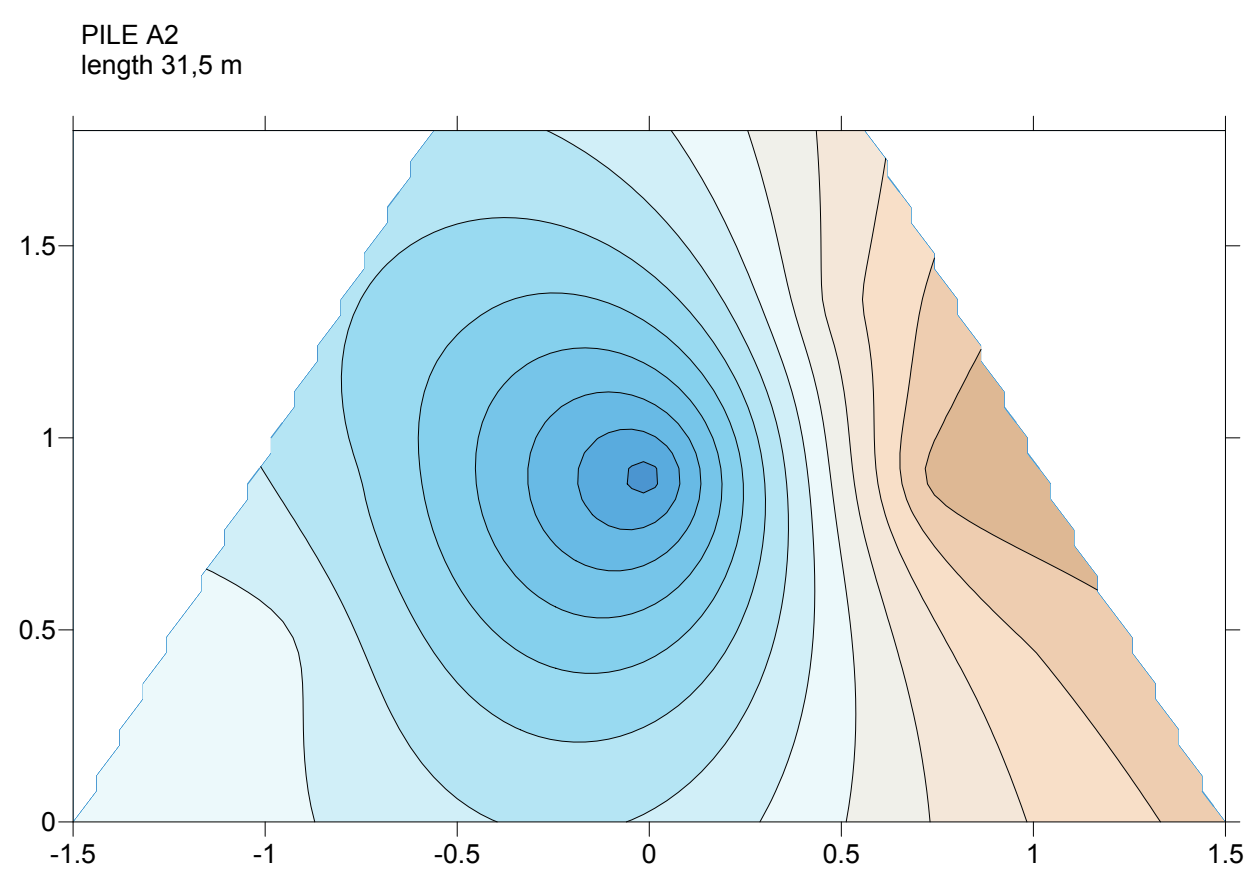

Supplement: s1 [file s1]

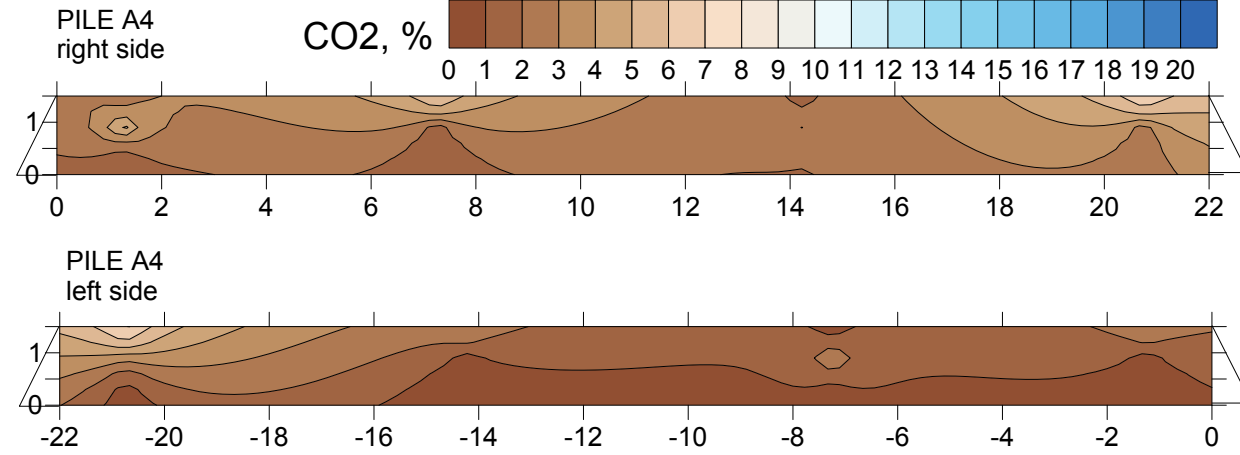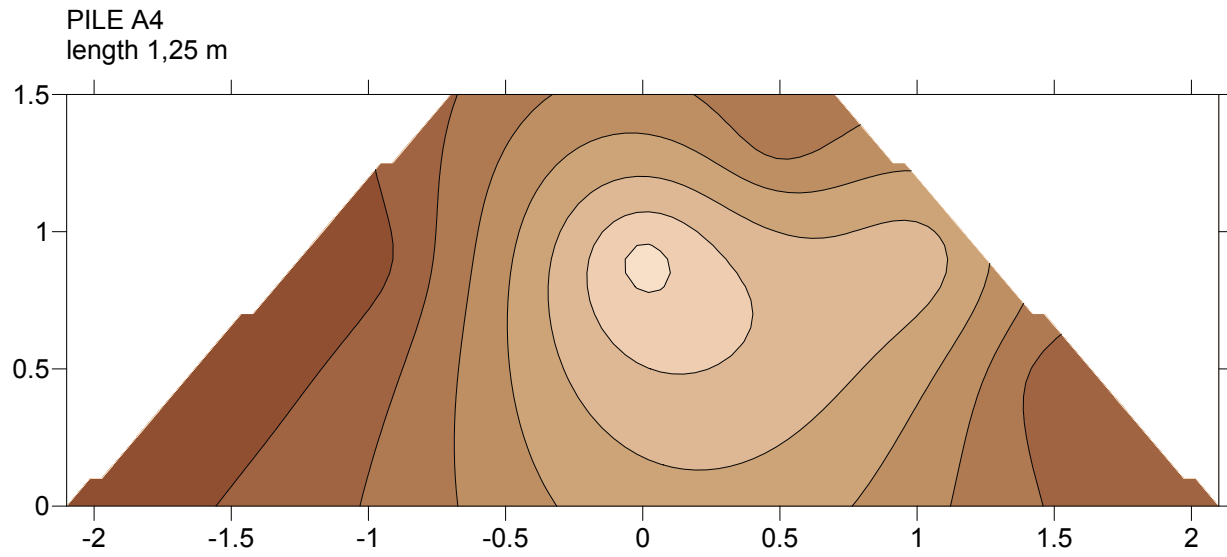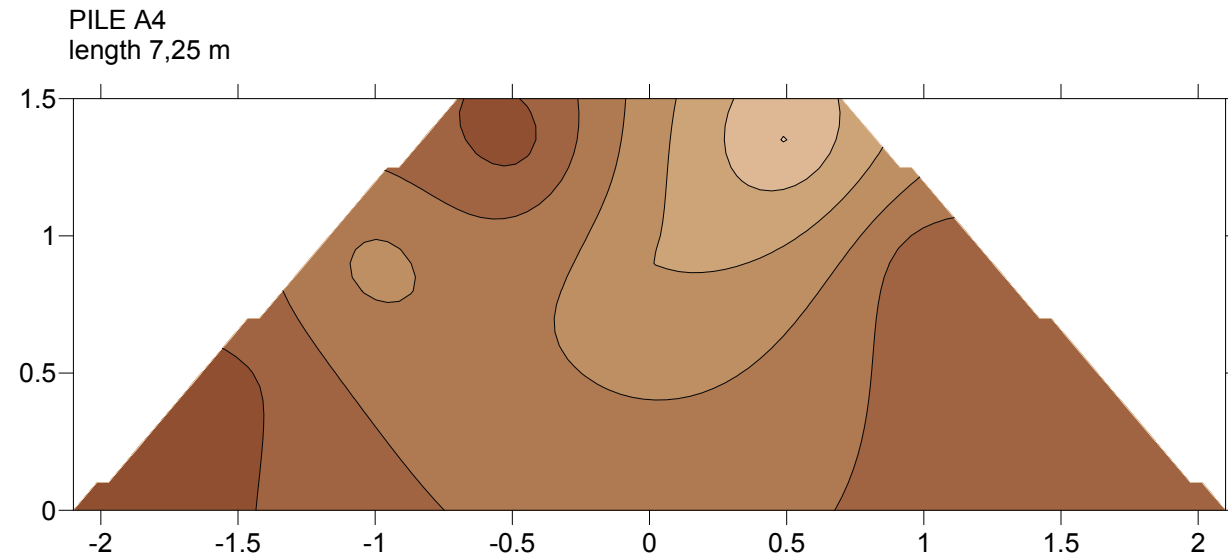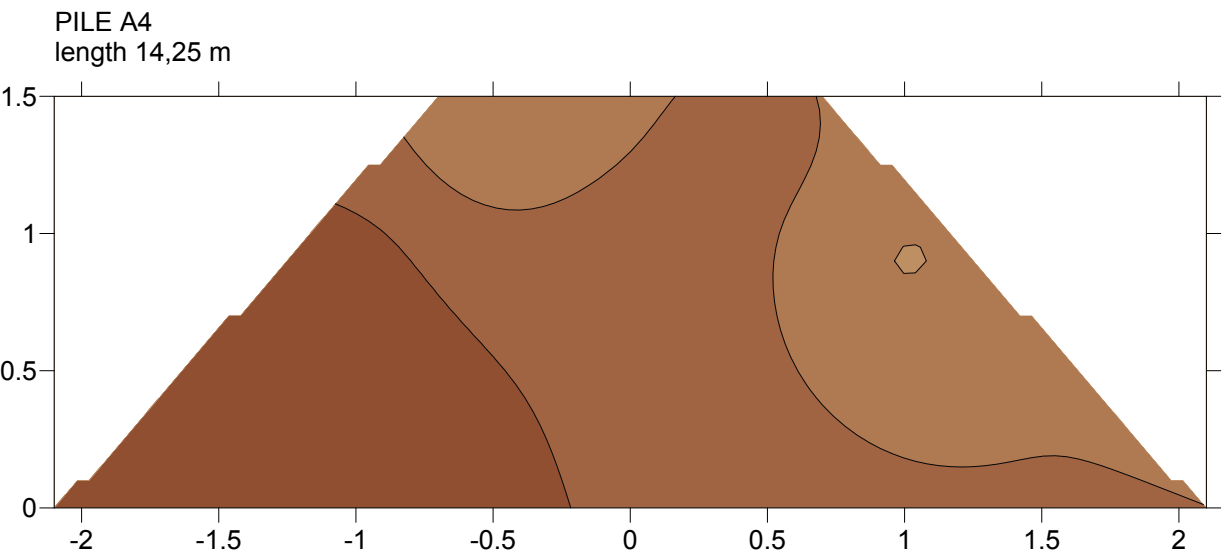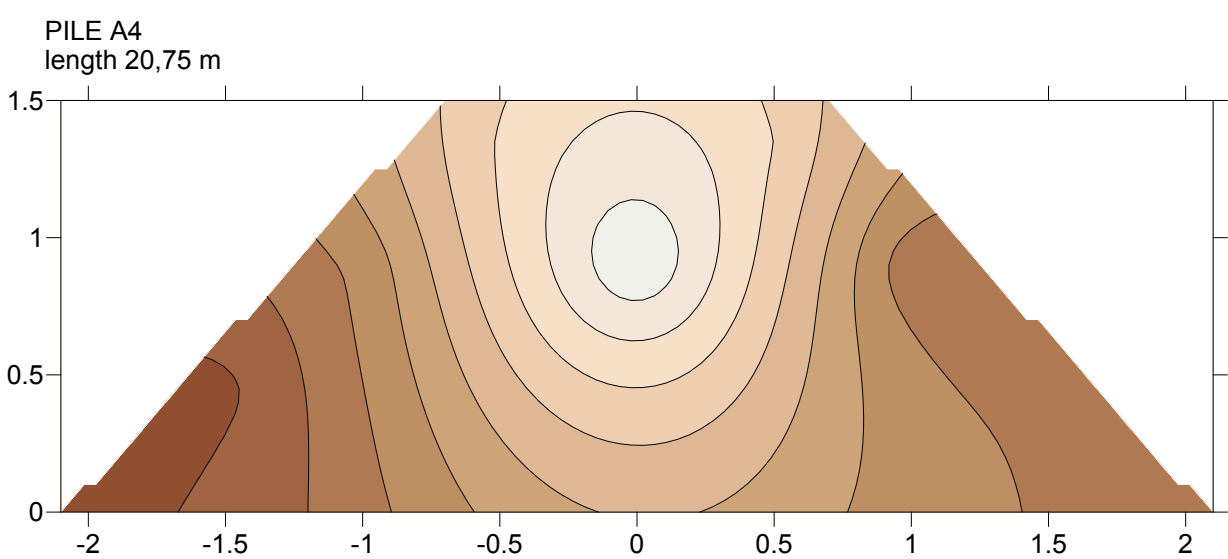

Supplement: s1 [file s1]

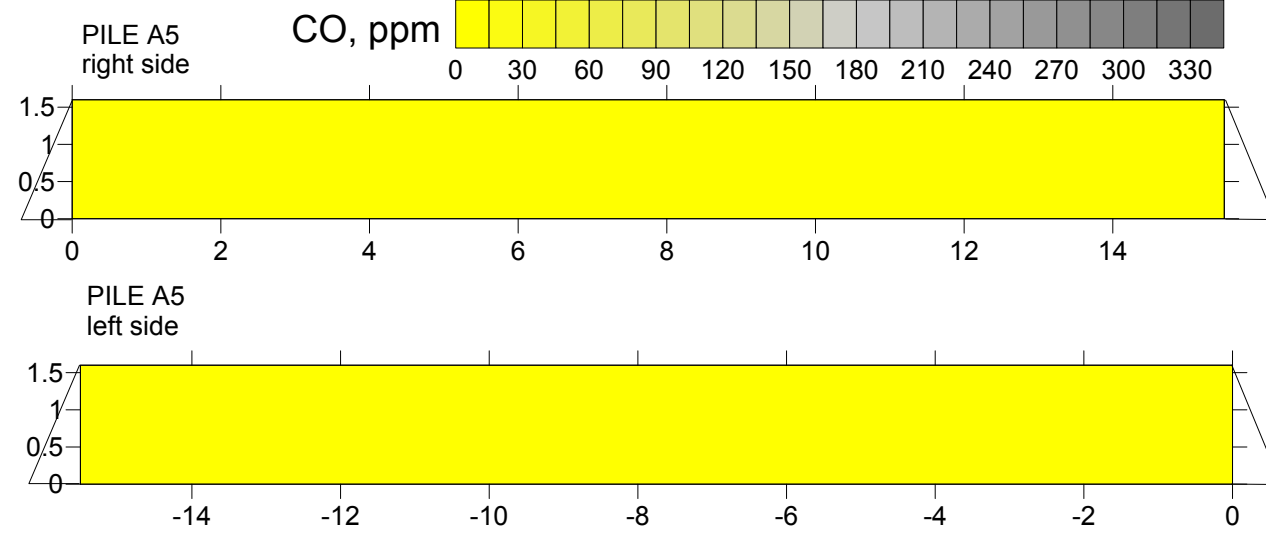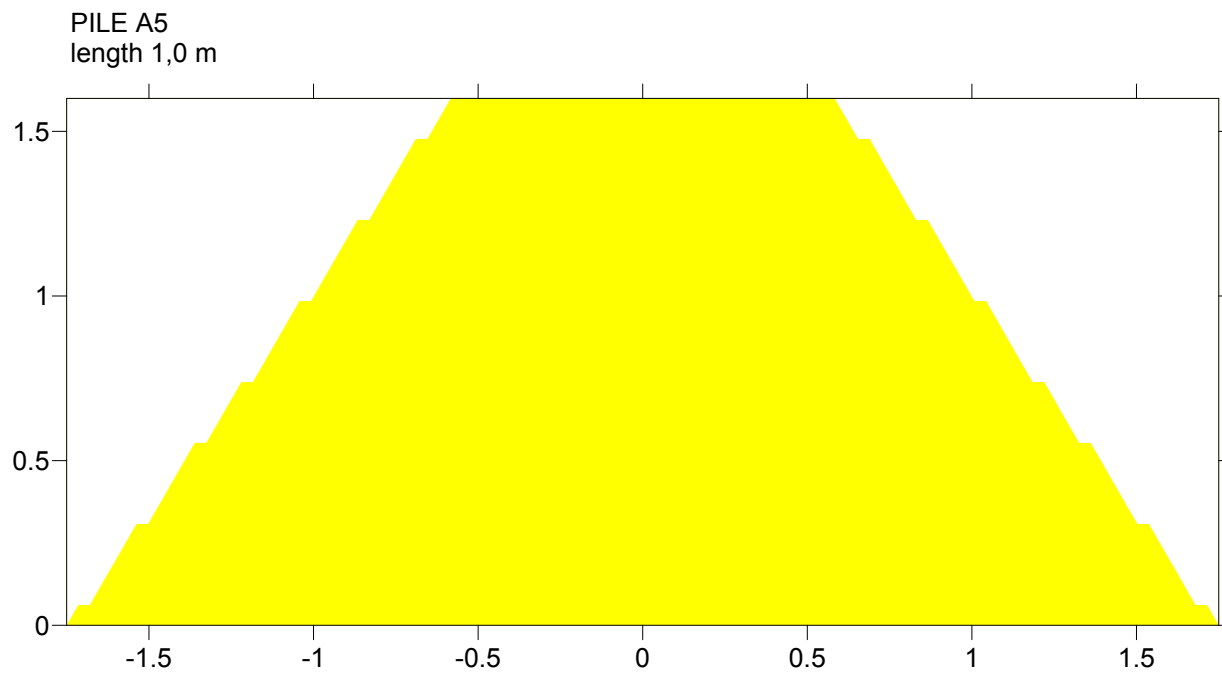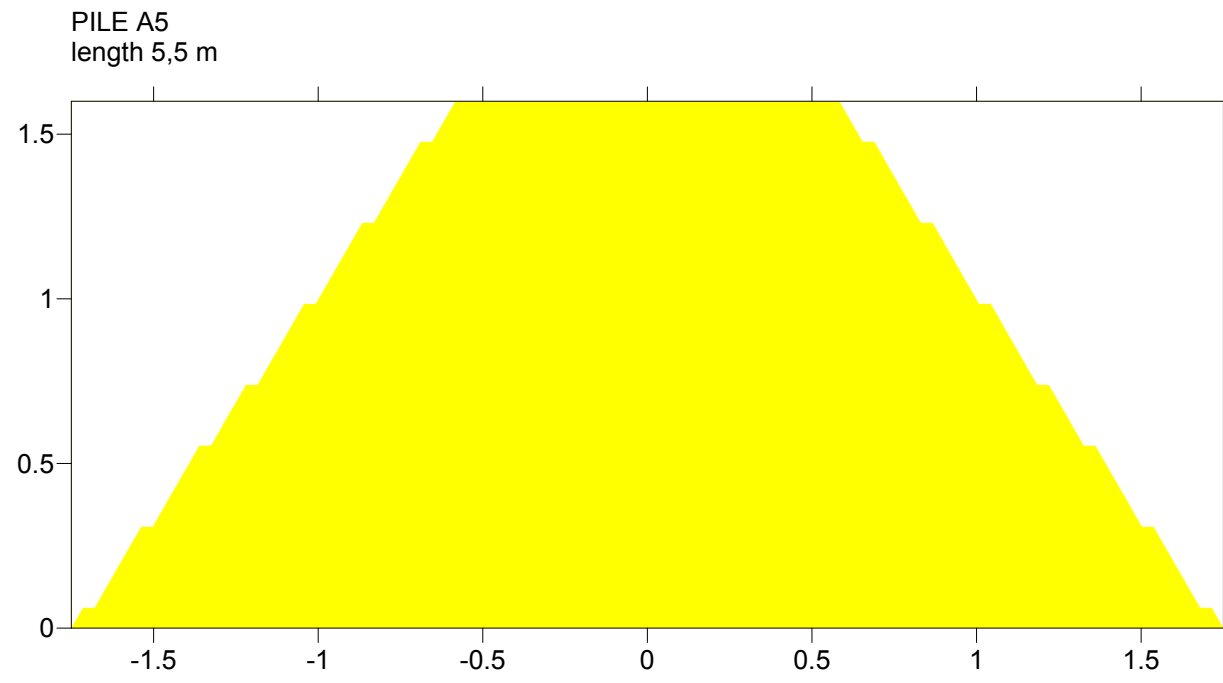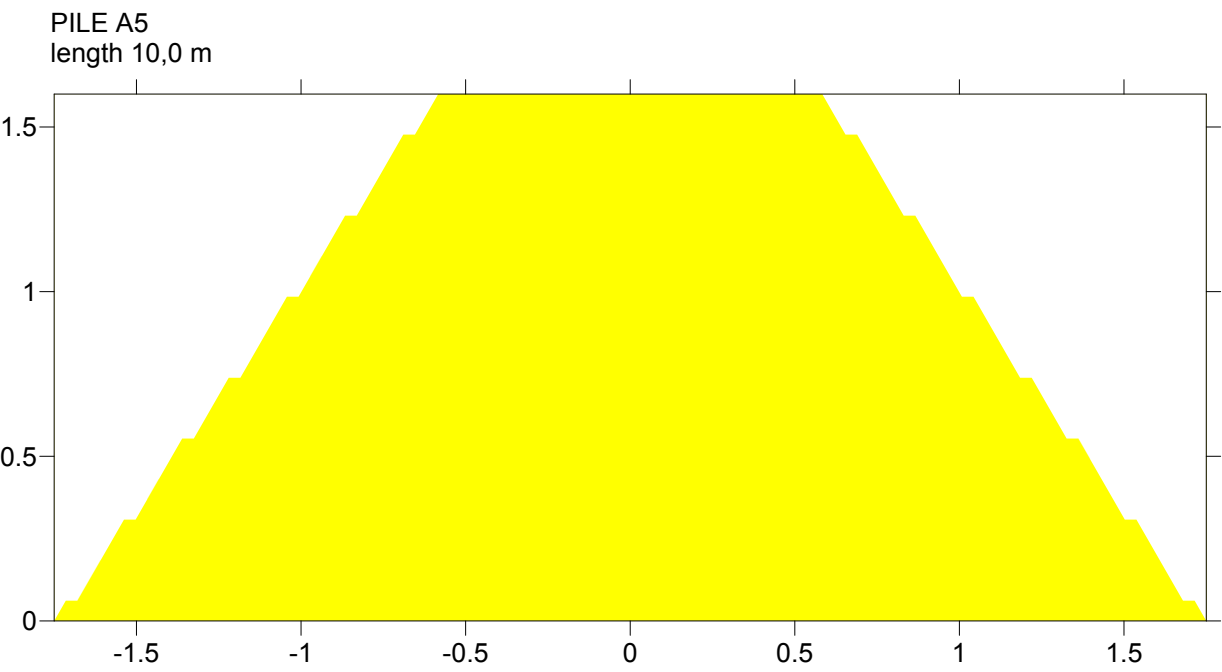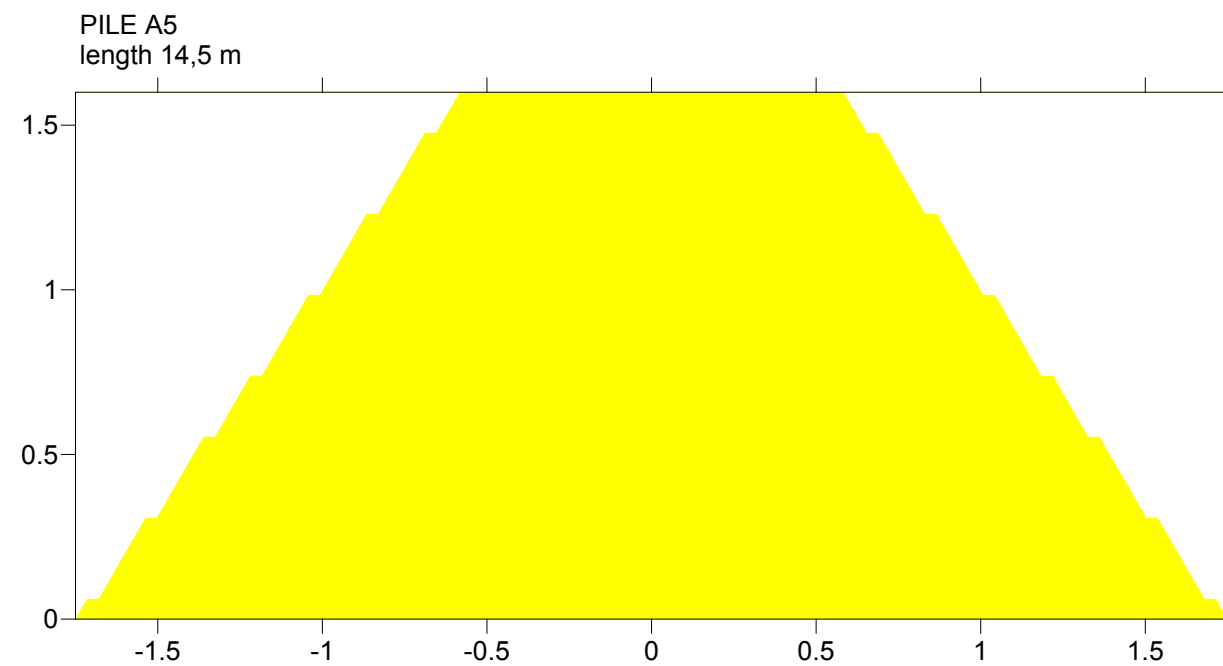

Supplement: s1 [file s1]

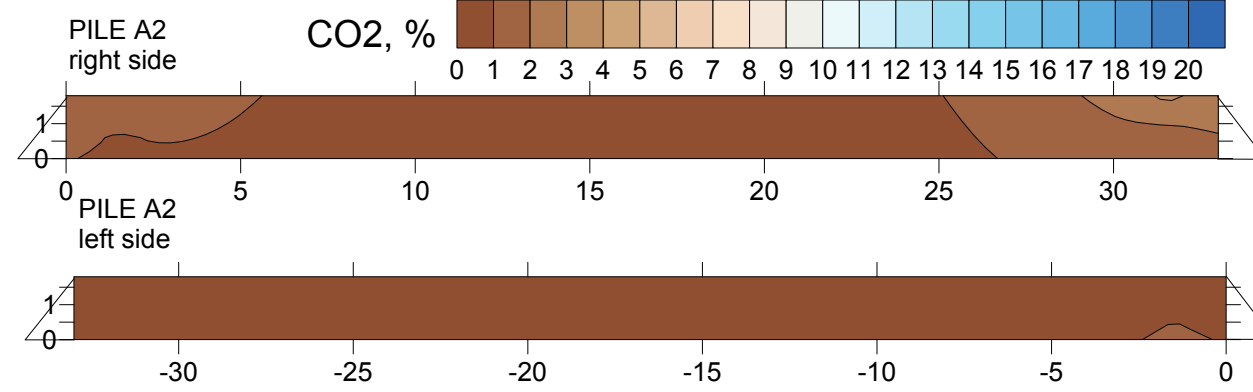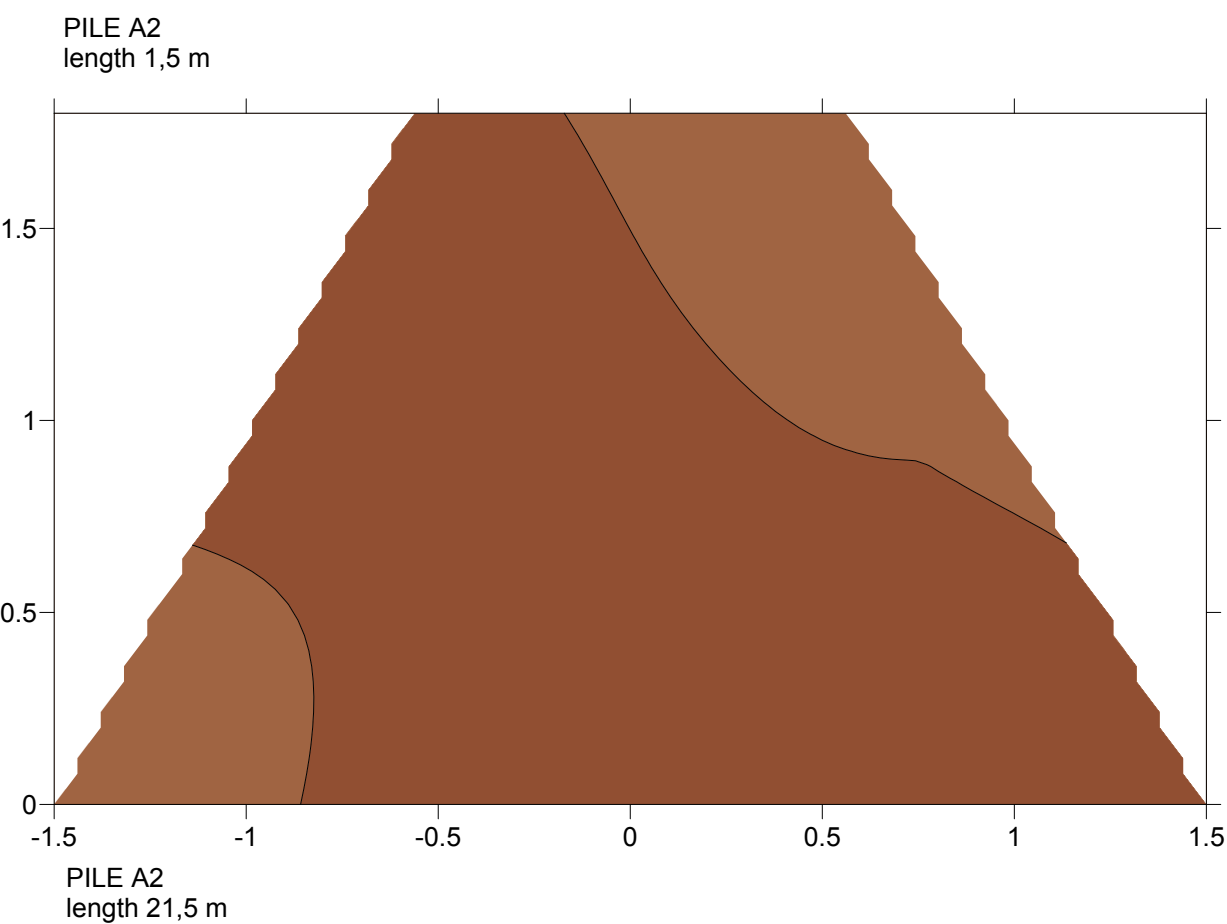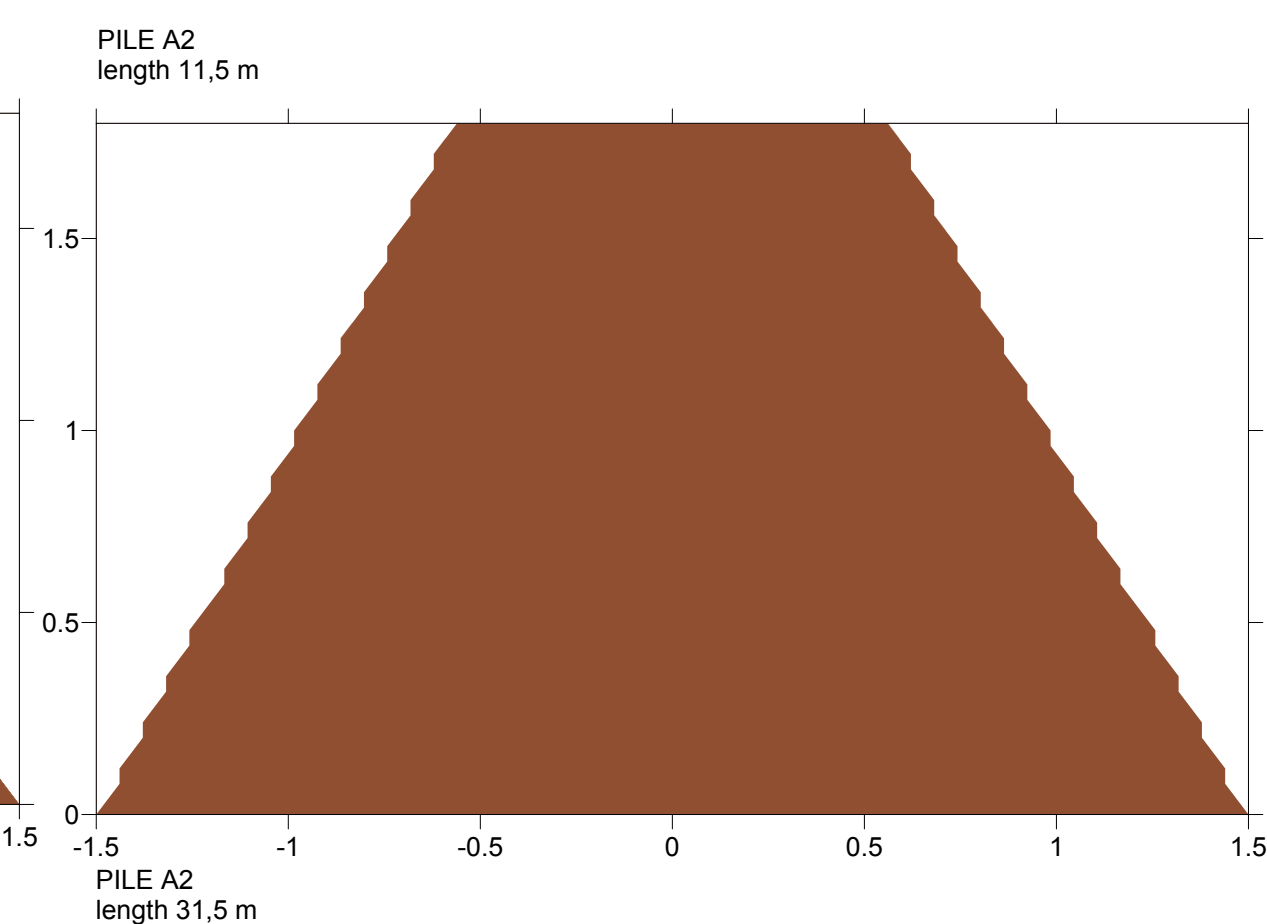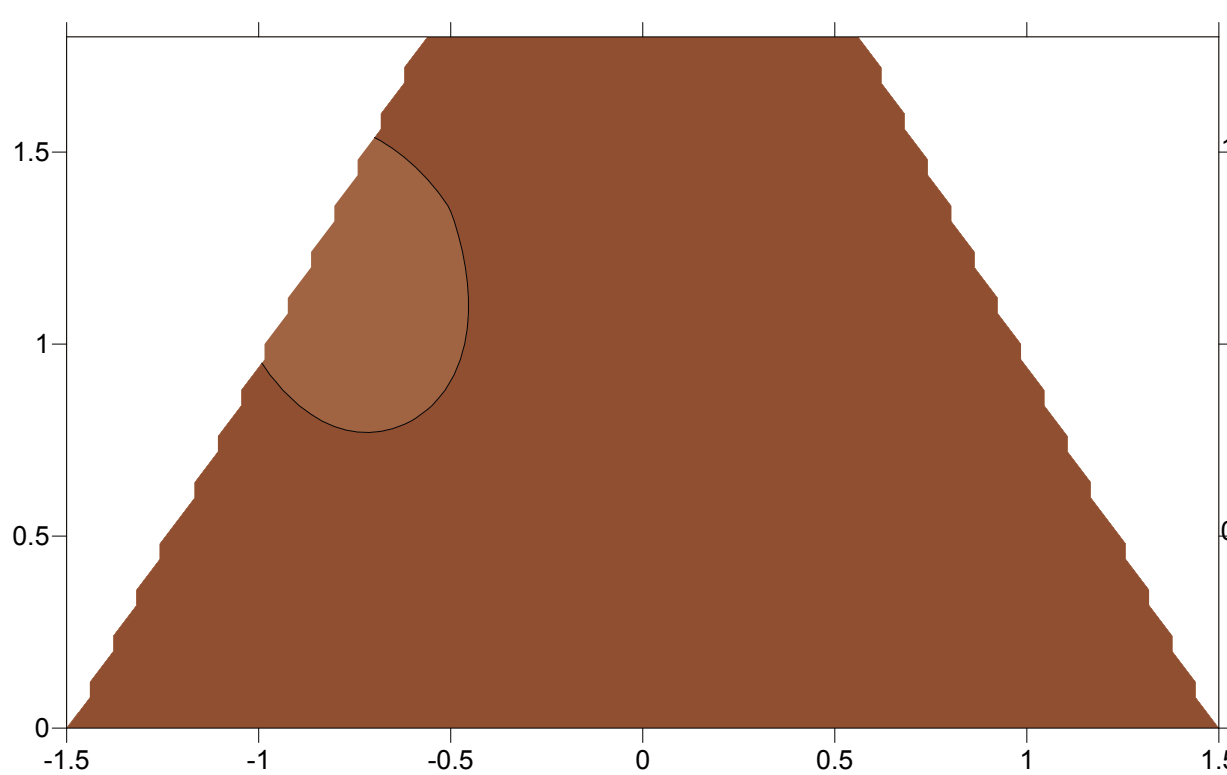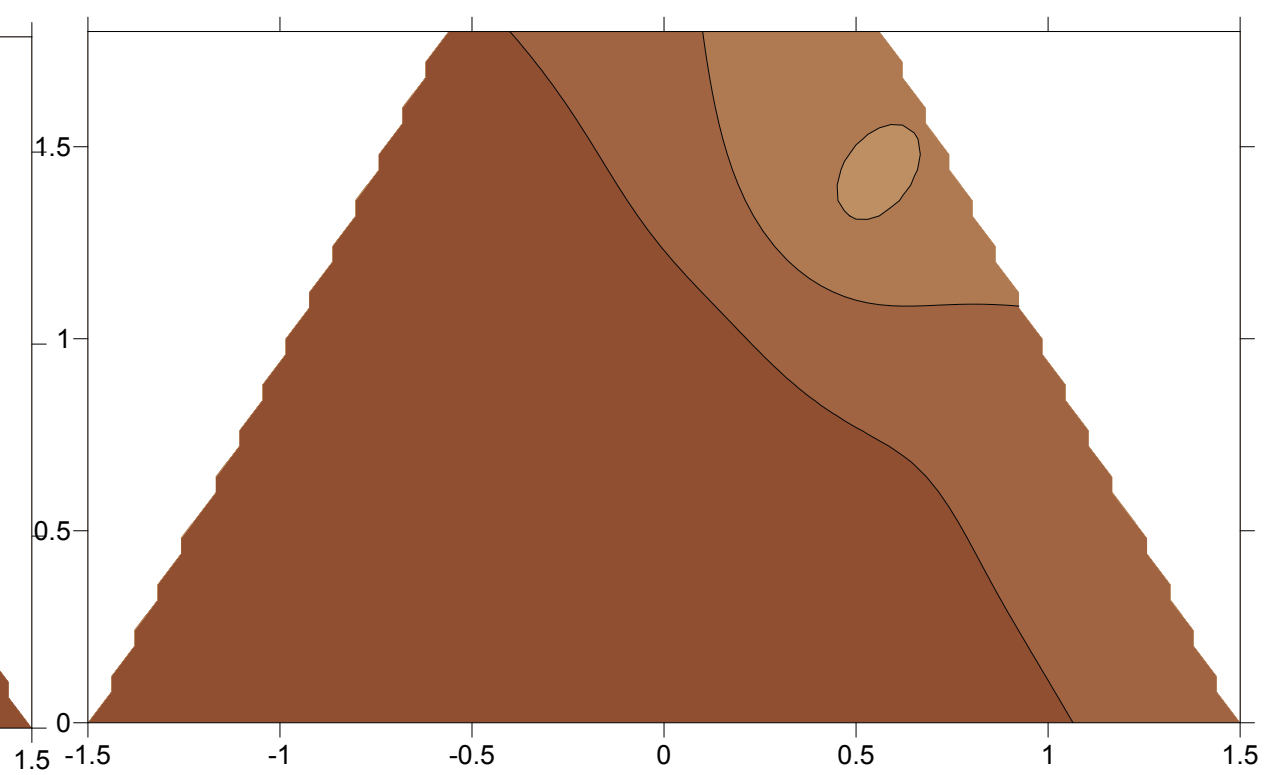

Supplement: s1 [file s1]

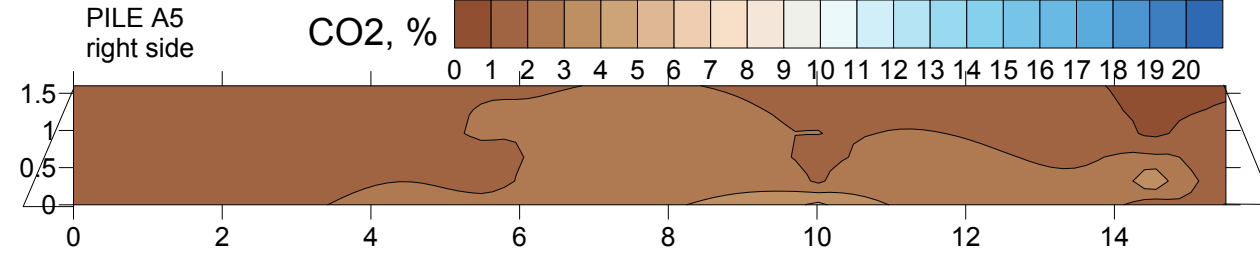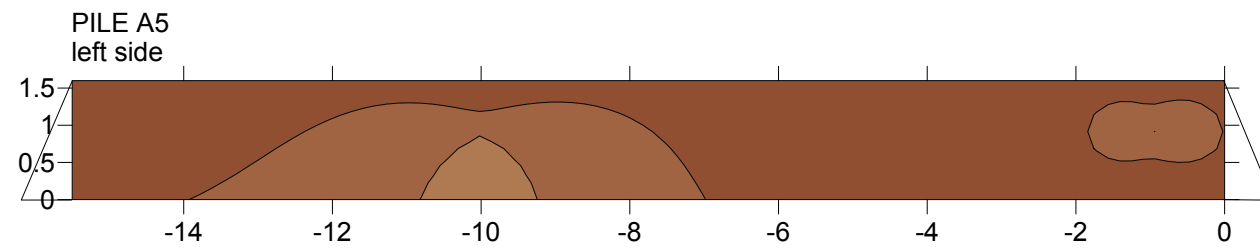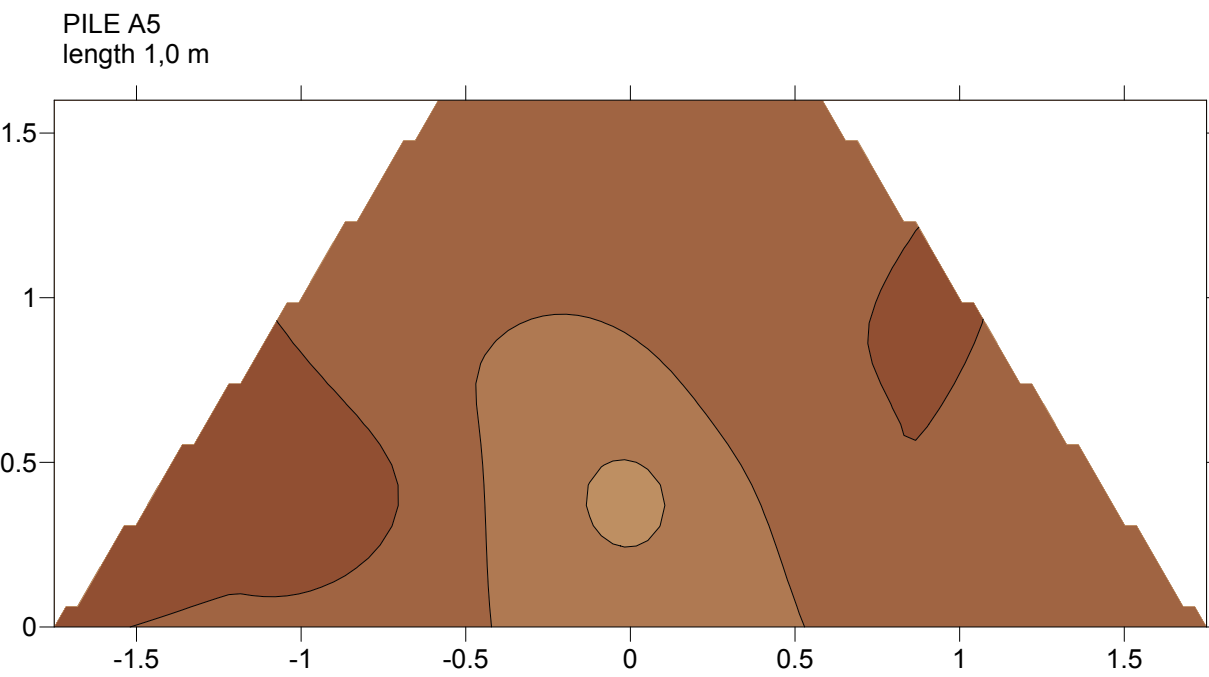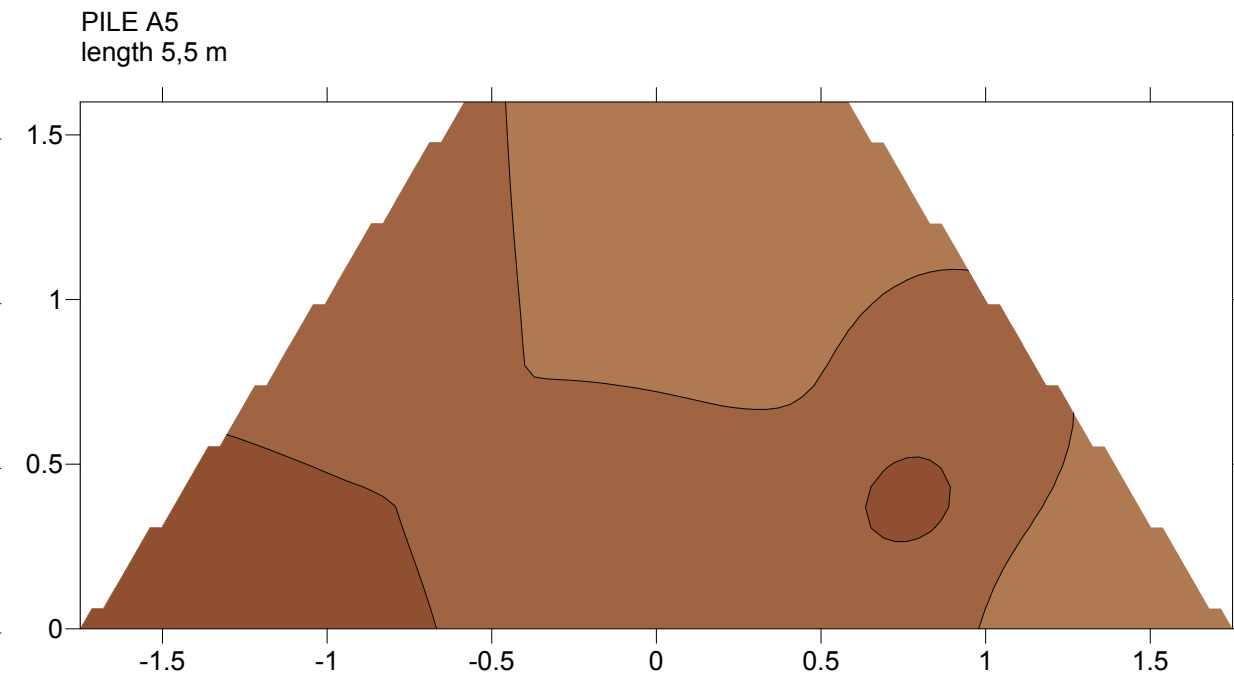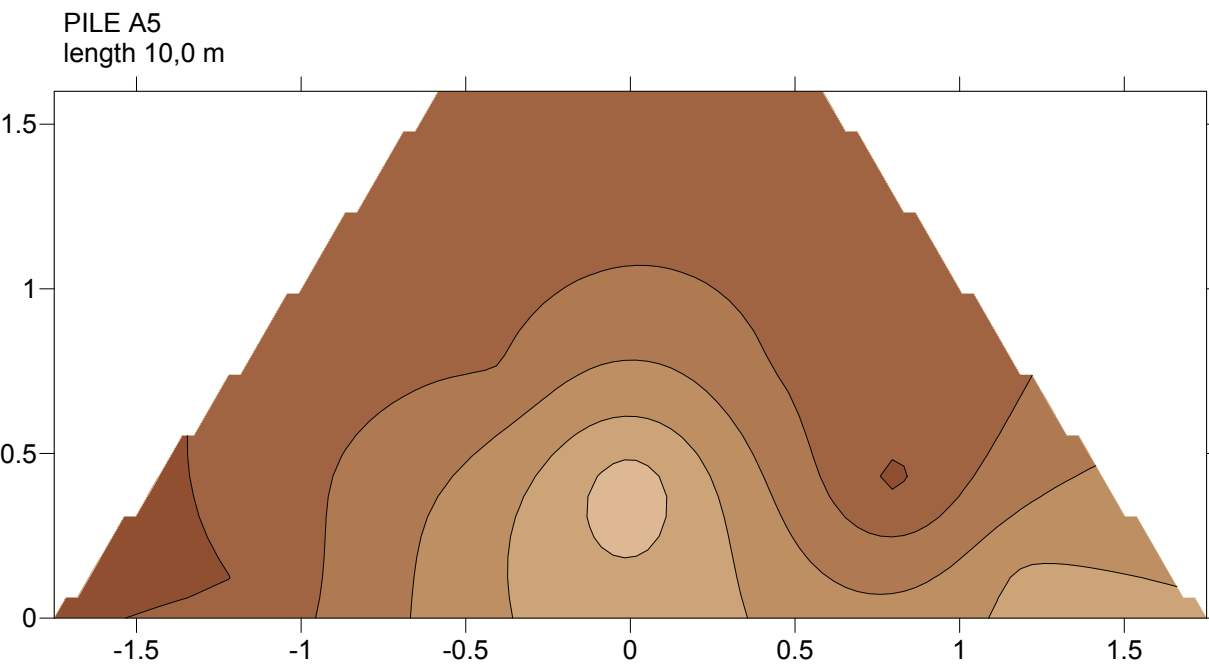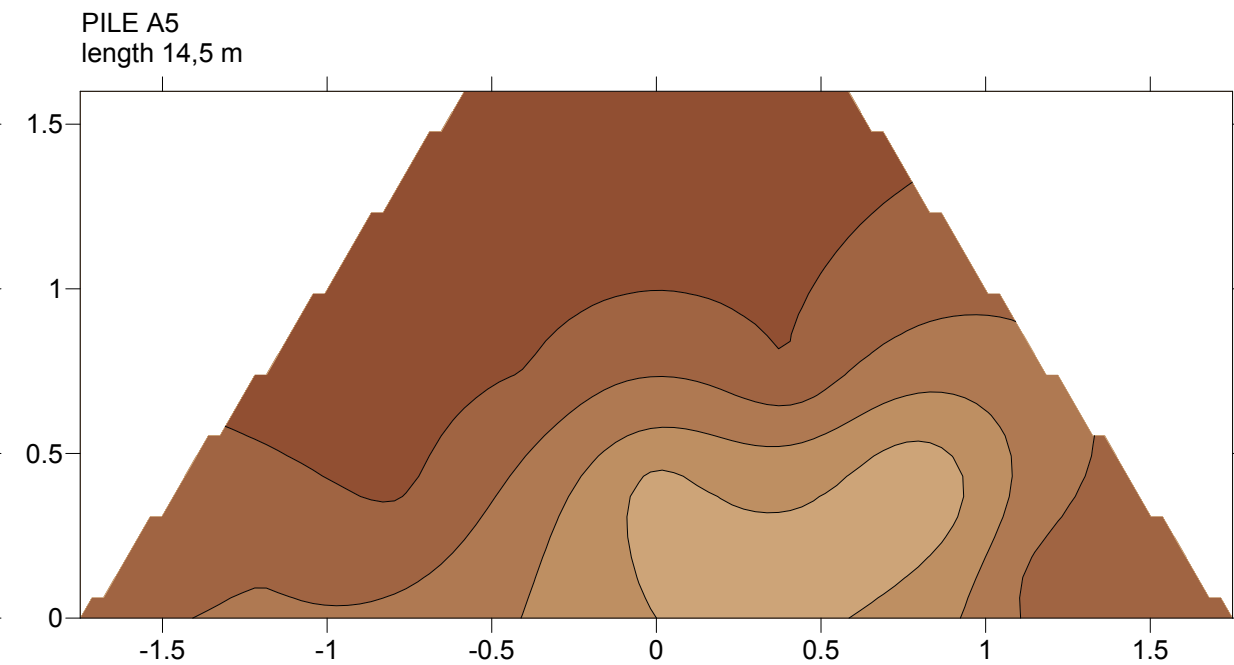

Supplement: s1 [file s1]

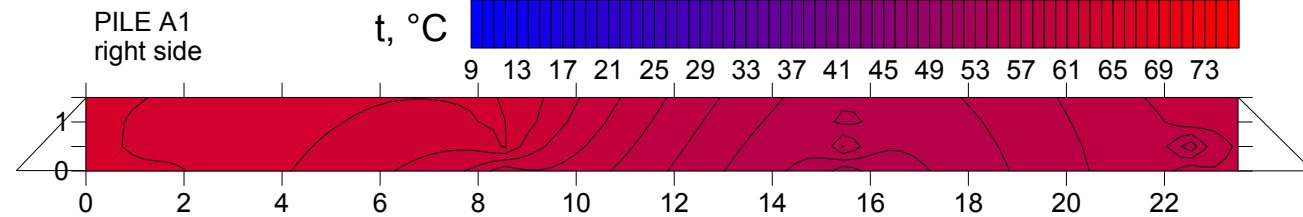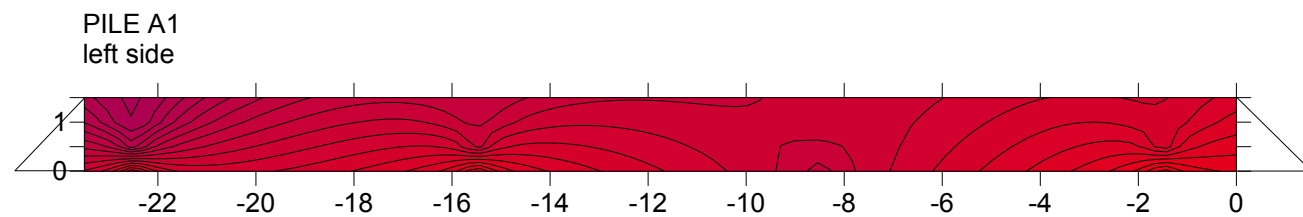

PILE A1  
length 1,5 m

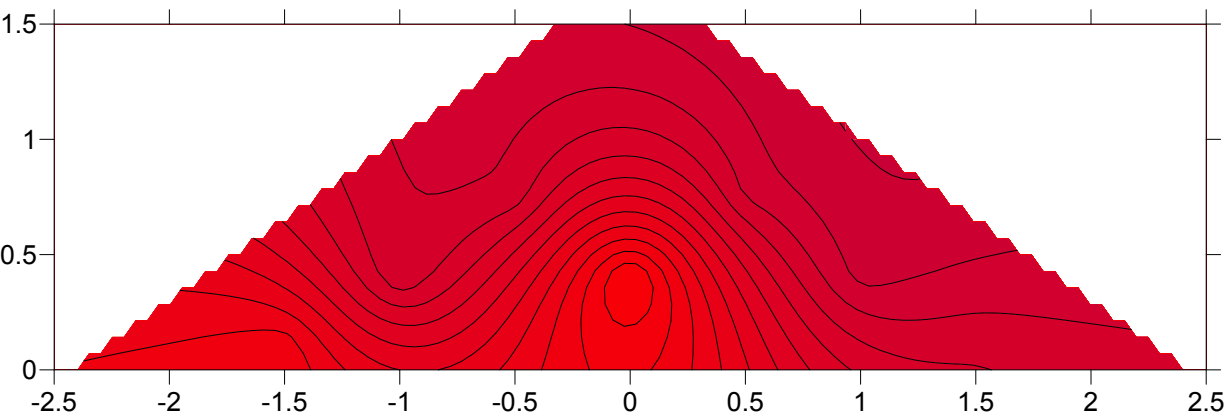

PILE A1  
length 8,5 m

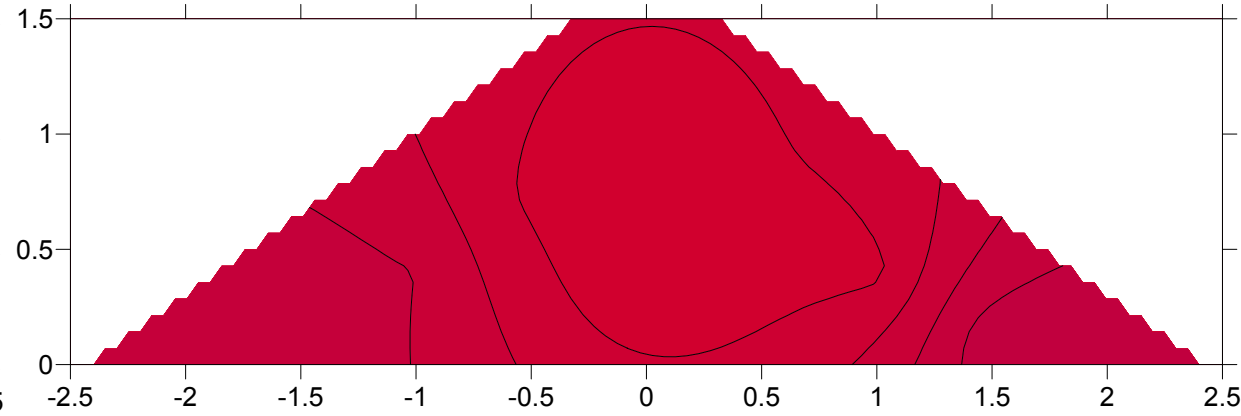

PILE A1  
length 15,5 m

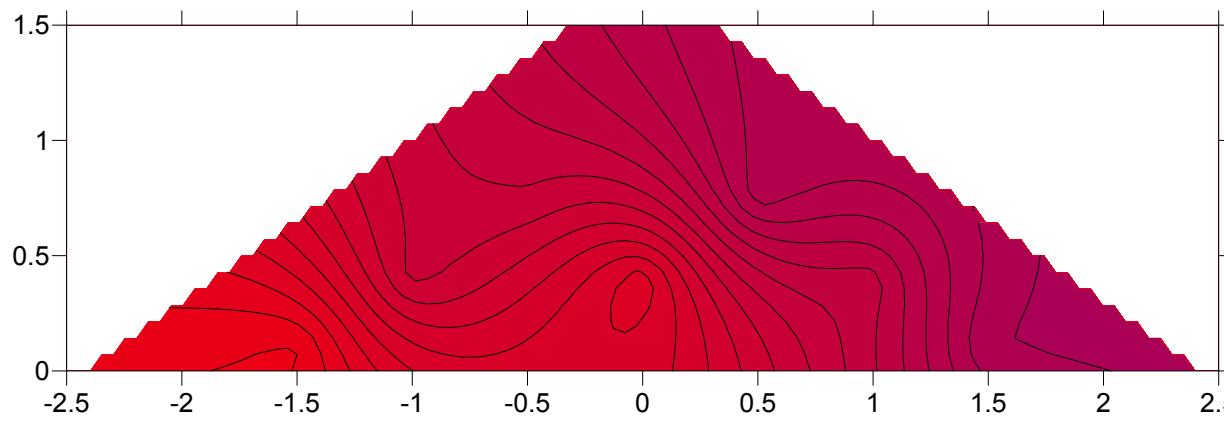

PILE A1  
length 22,5 m

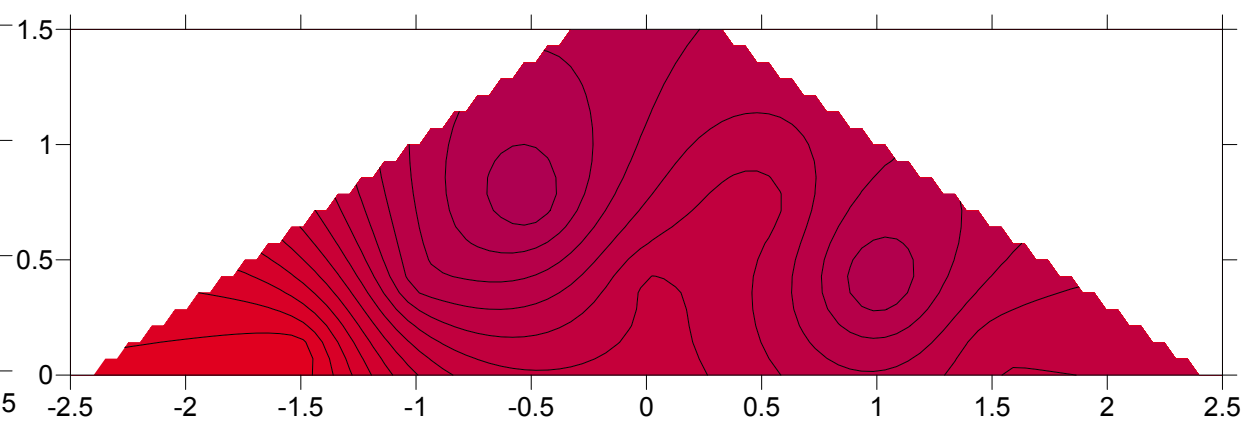

Supplement: s1 [file s1]

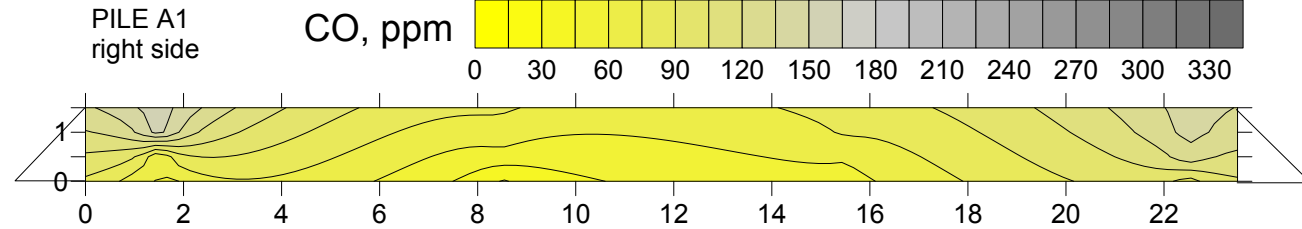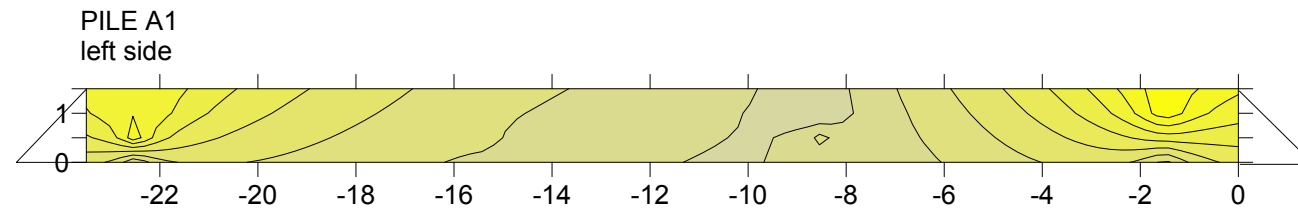

PILE A1  
length 1,5 m

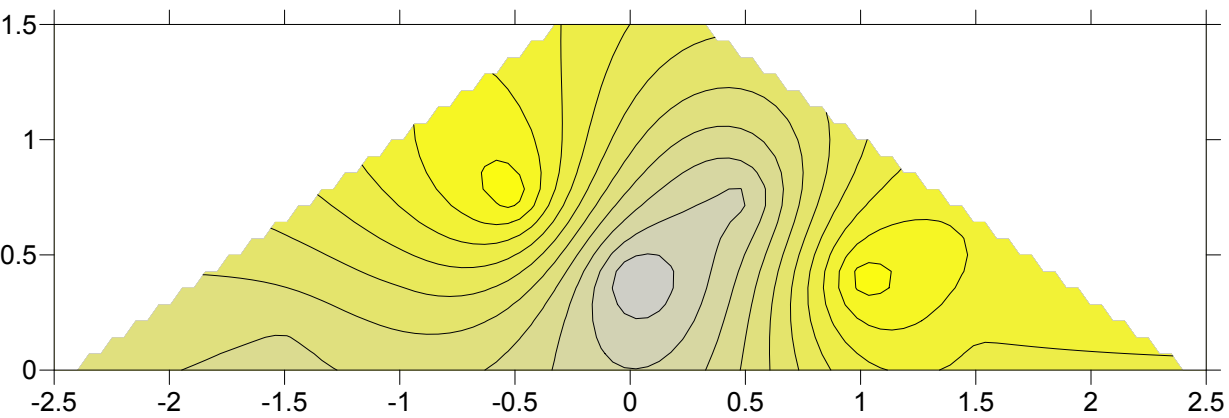

PILE A1  
length 8,5 m

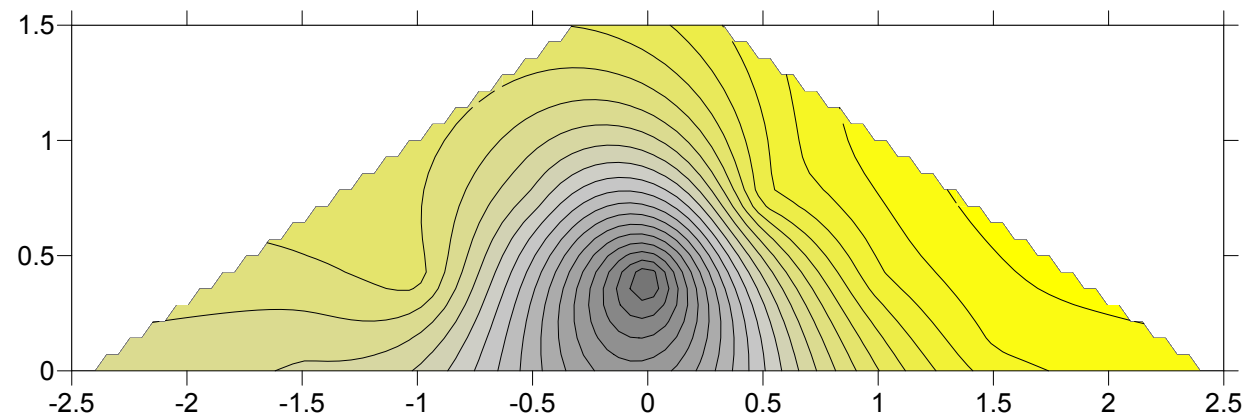

PILE A1  
length 15,5 m

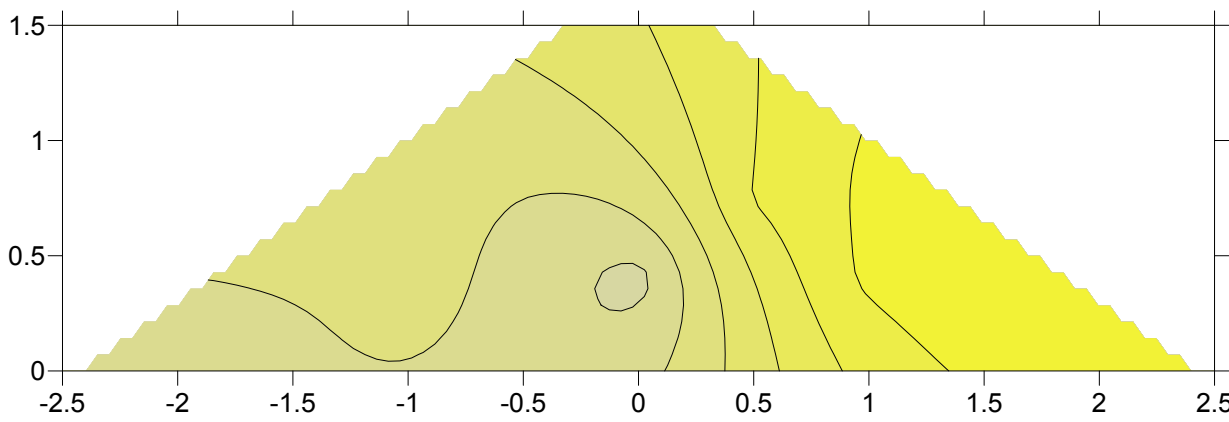

PILE A1  
length 22,5 m

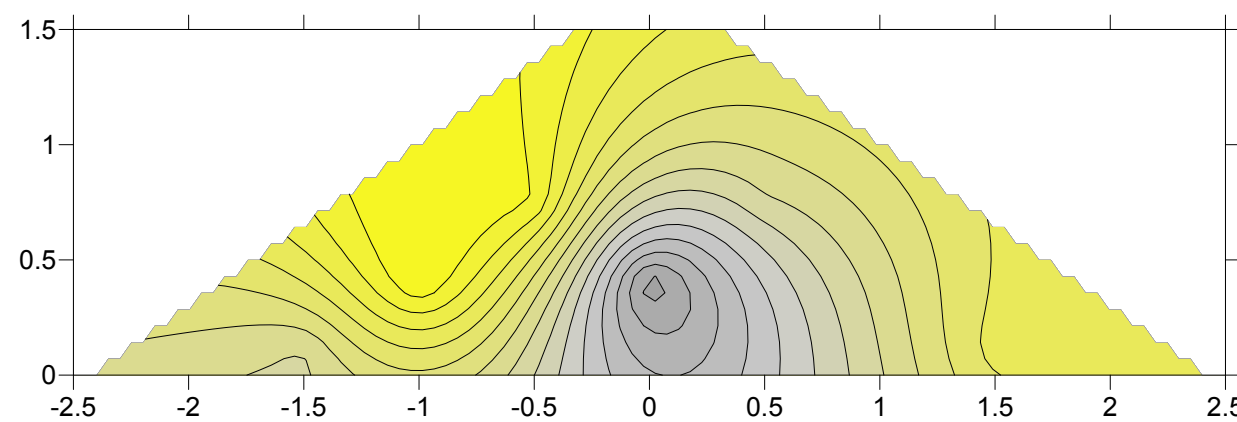

Supplement: s1 [file s1]

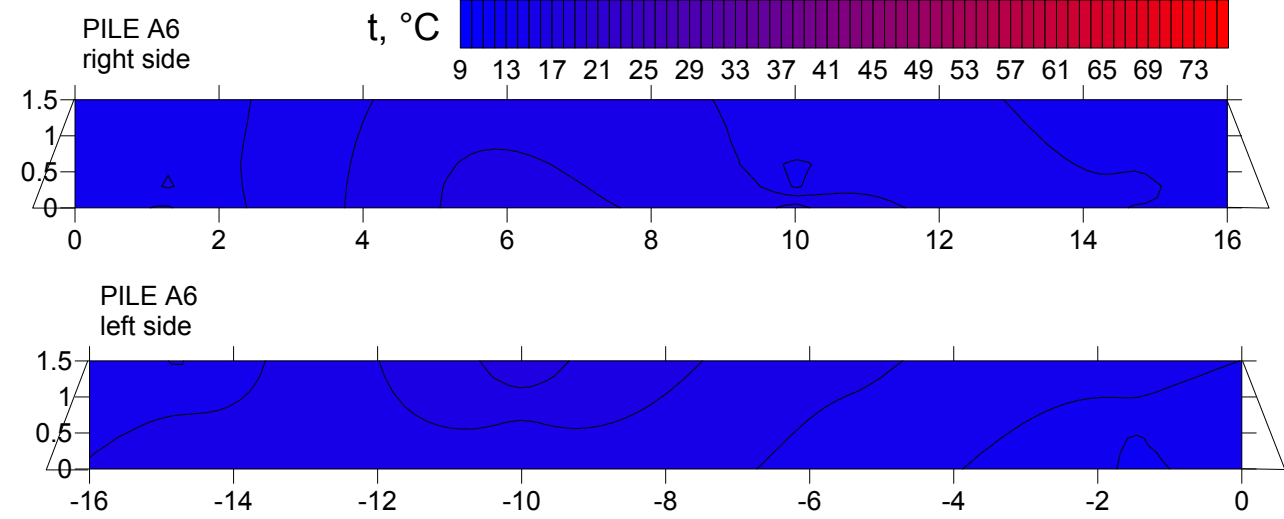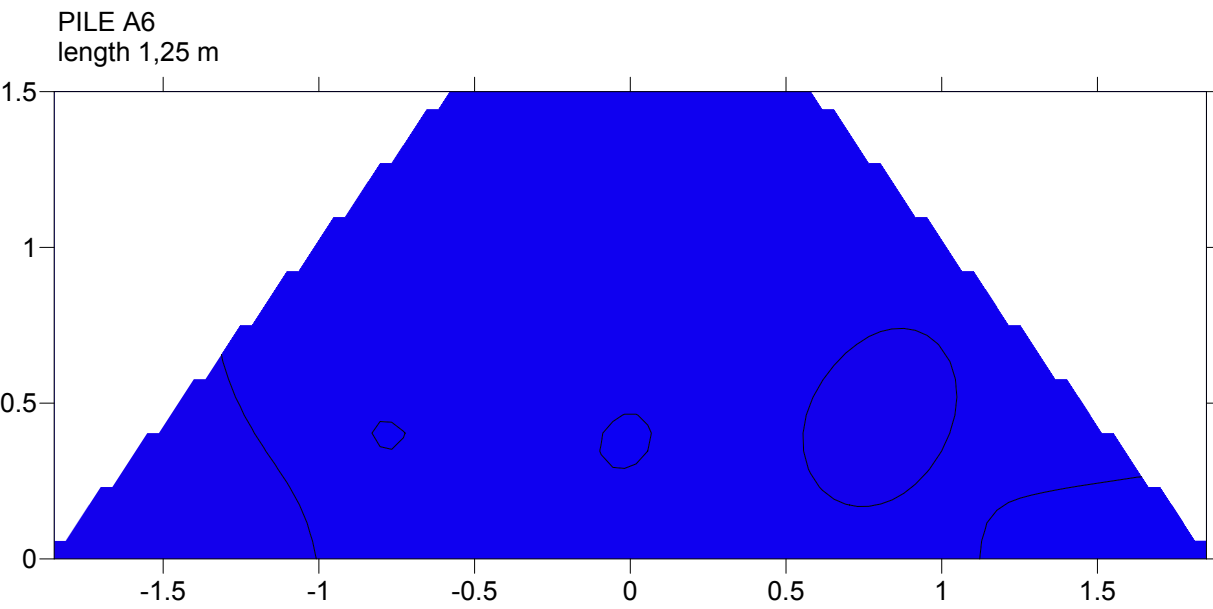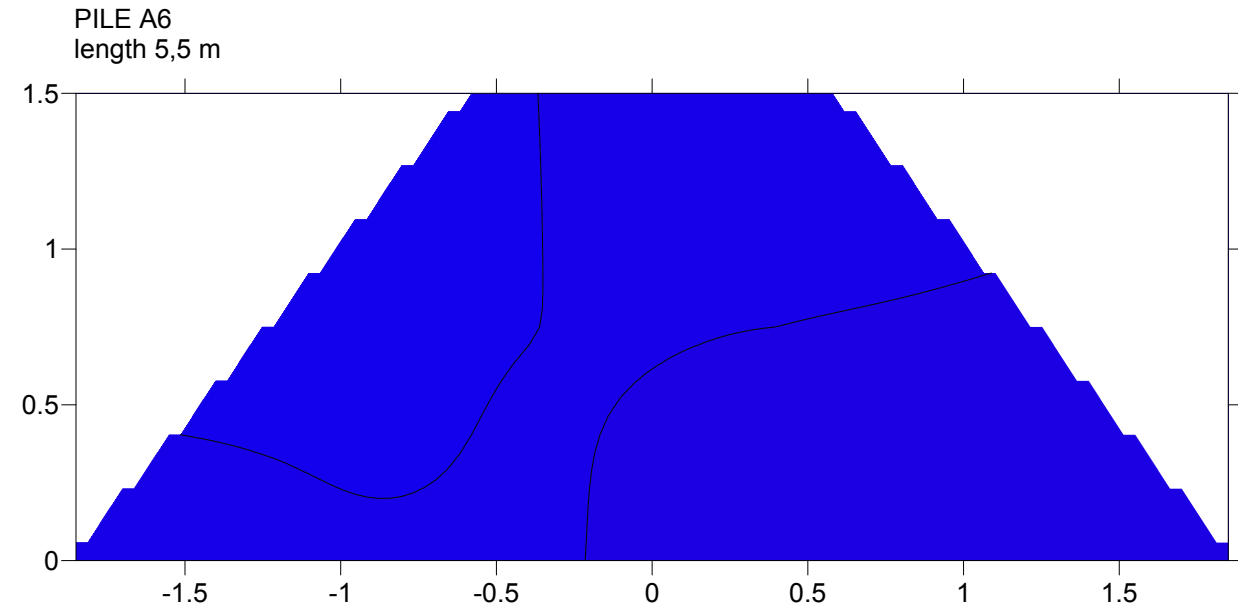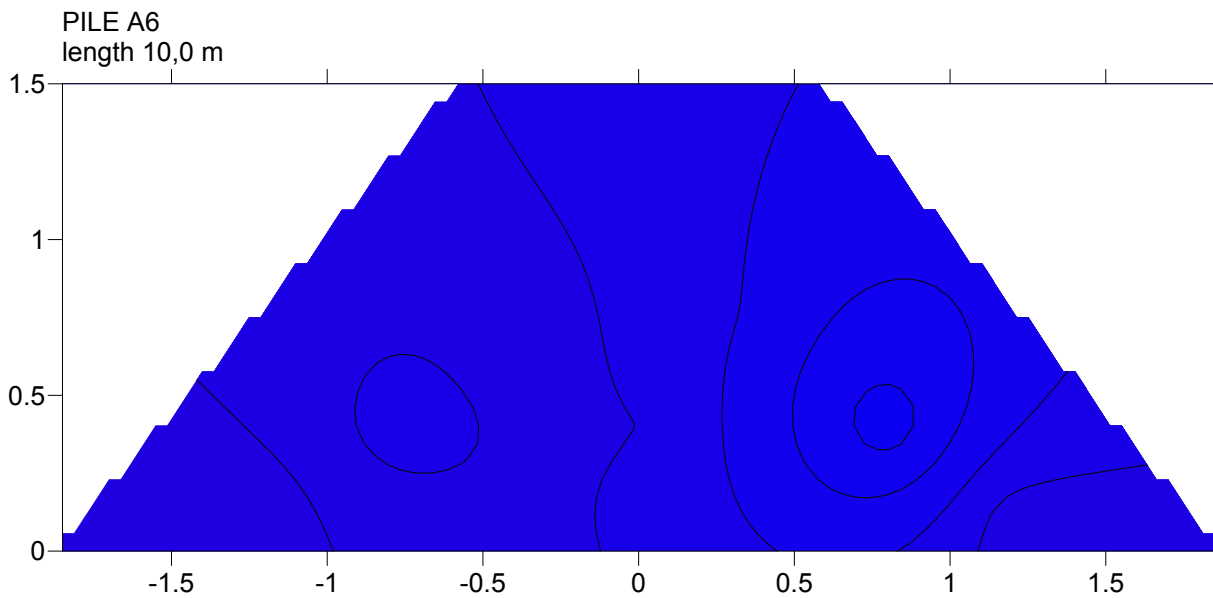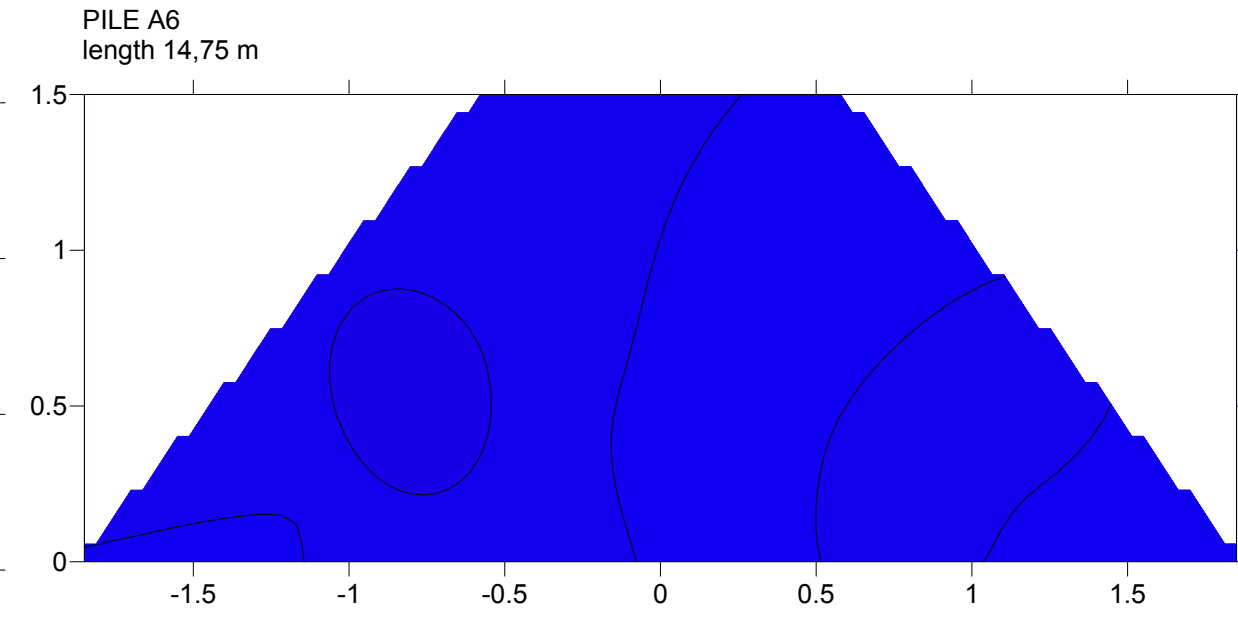

Supplement: s1 [file s1]

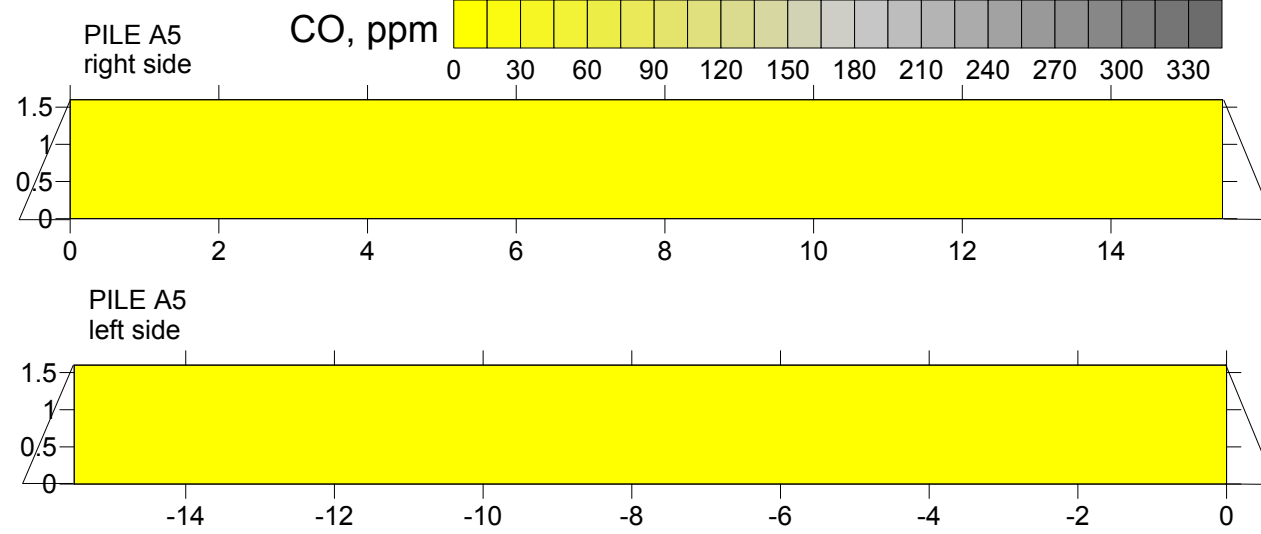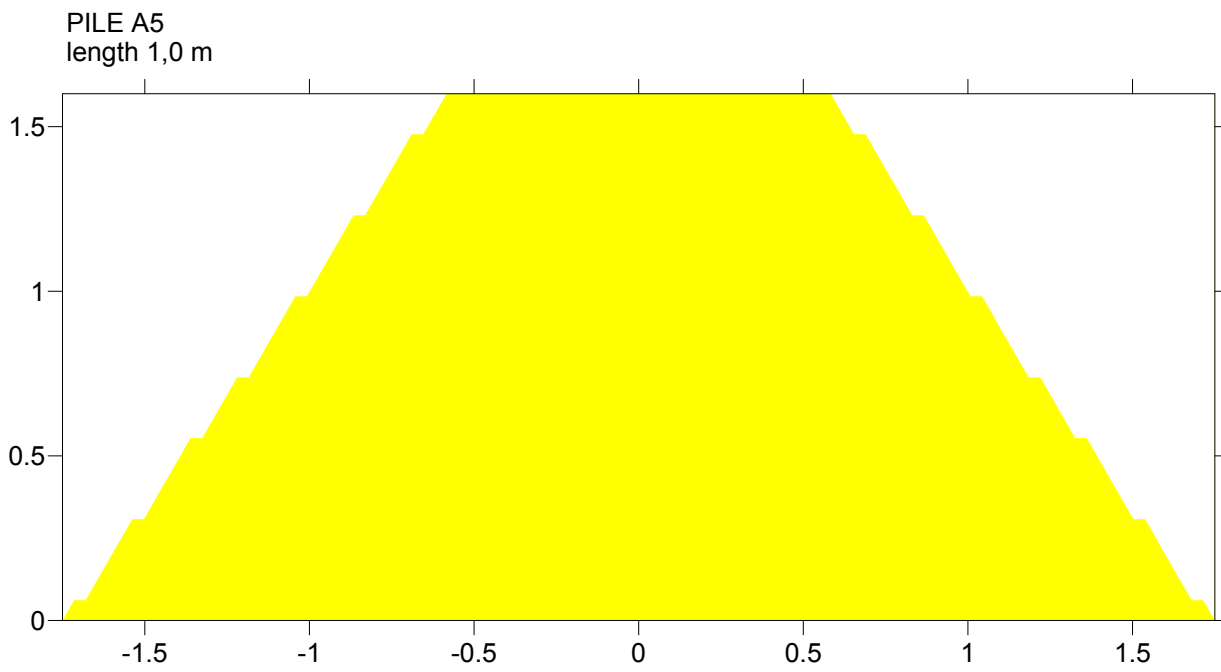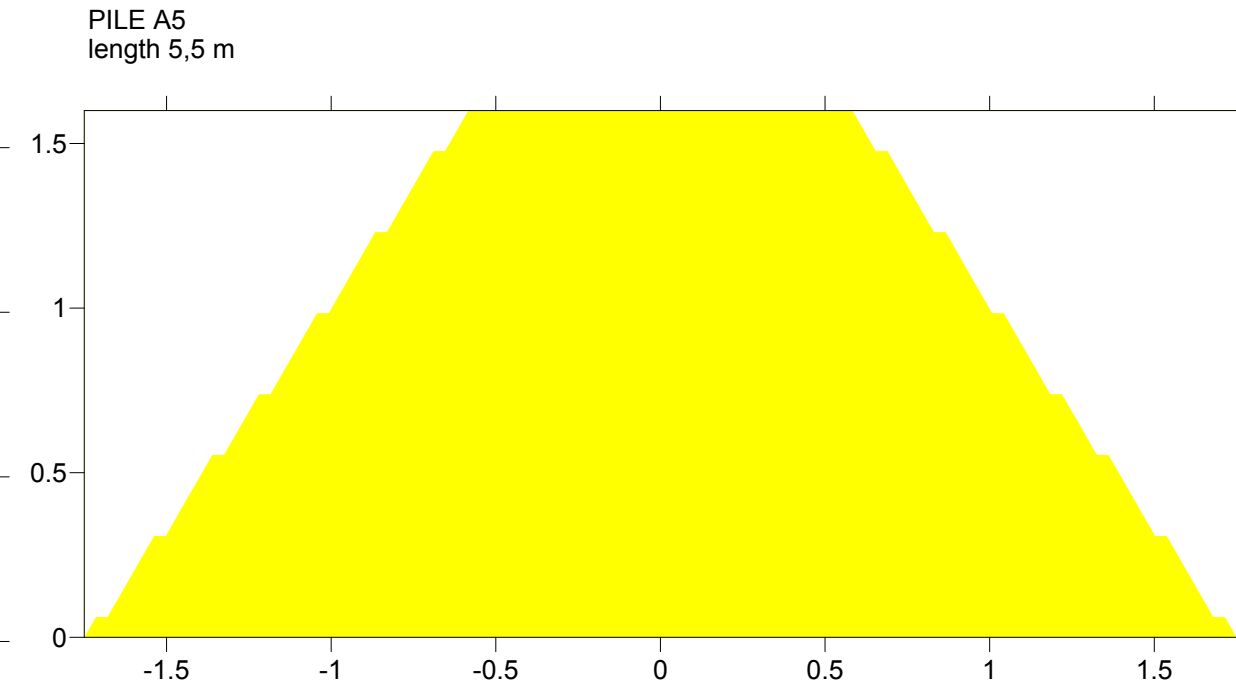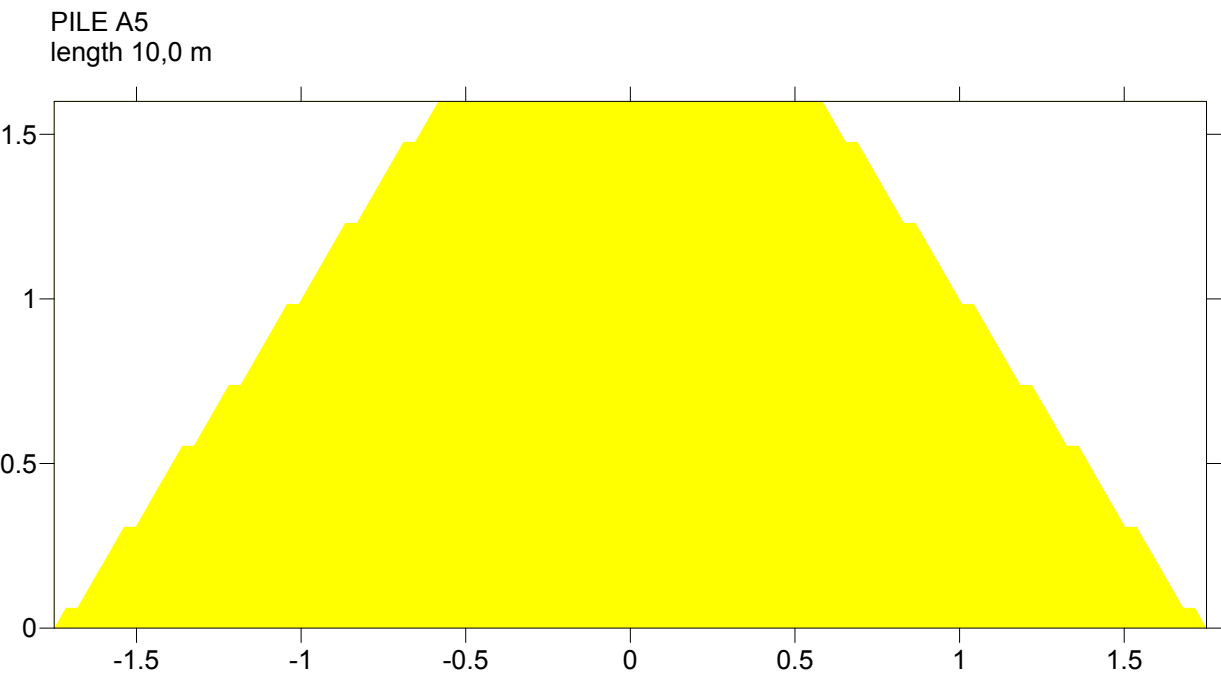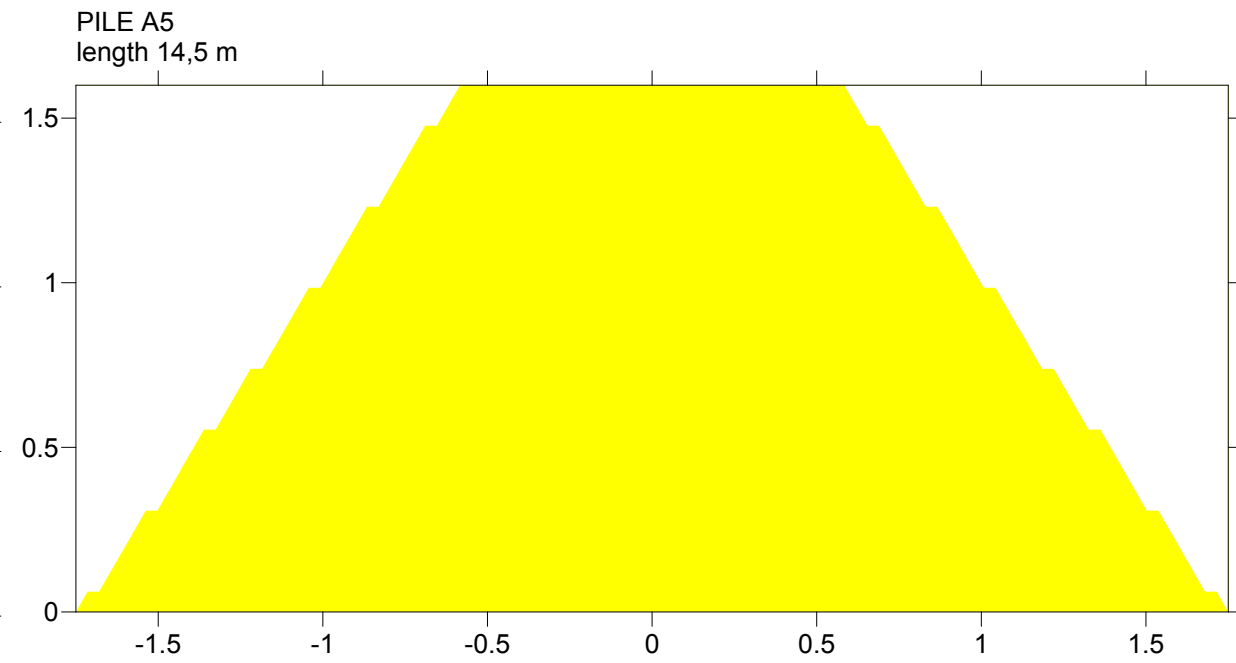

Supplement: s1 [file s1]

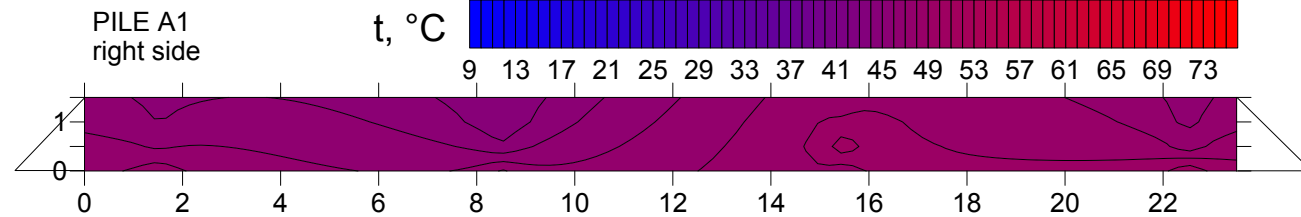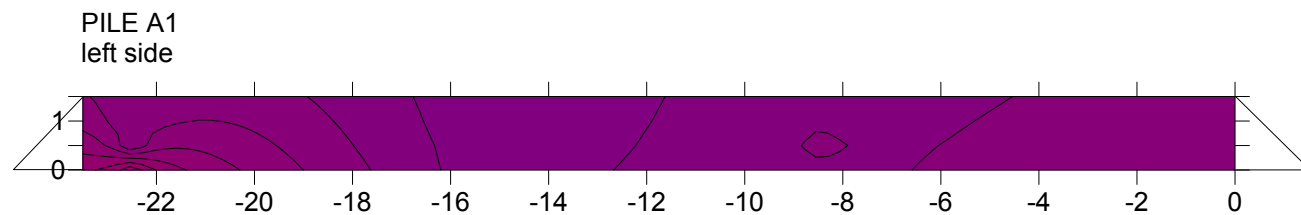

PILE A1  
length 1,5 m

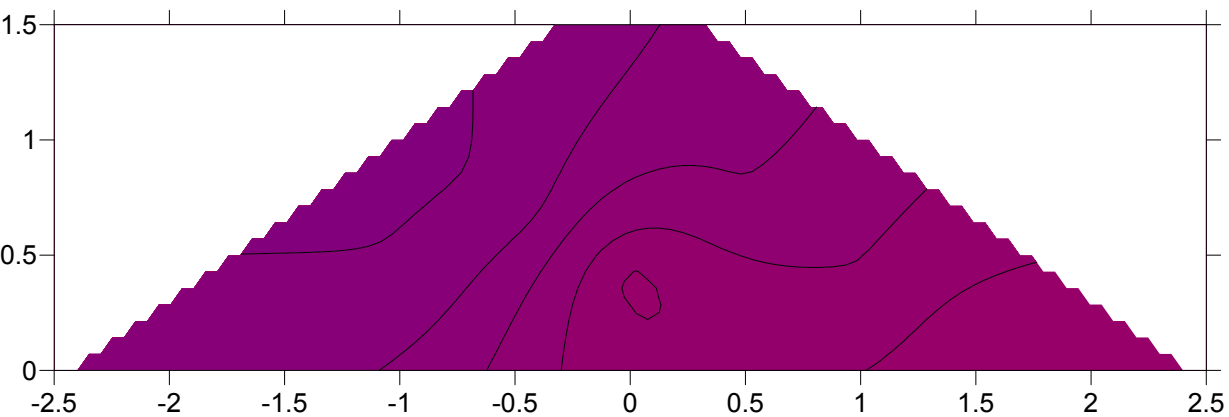

PILE A1  
length 8,5 m

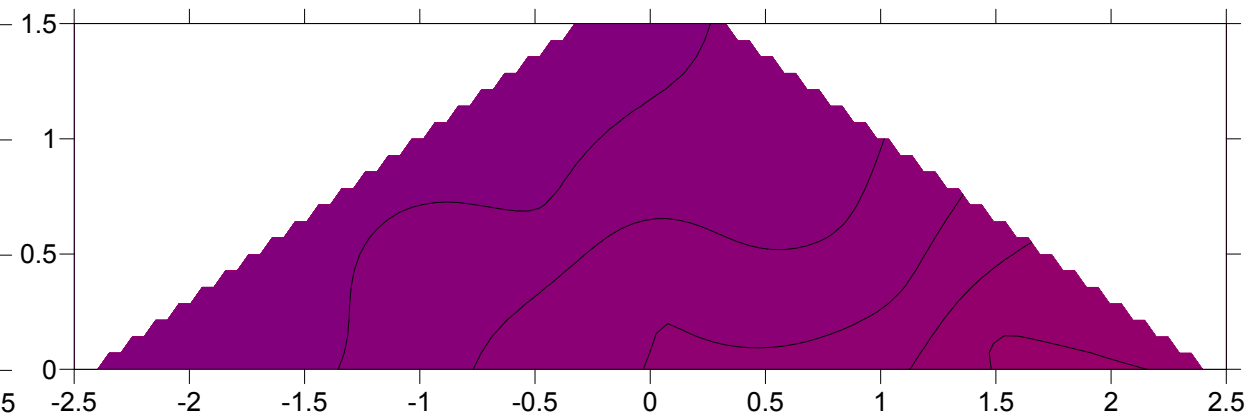

PILE A1  
length 15,5 m

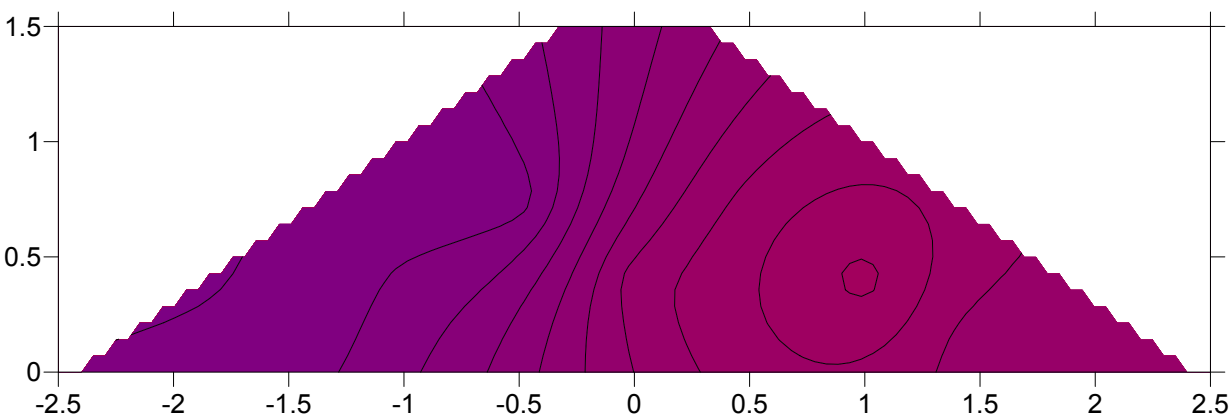

PILE A1  
length 22,5 m

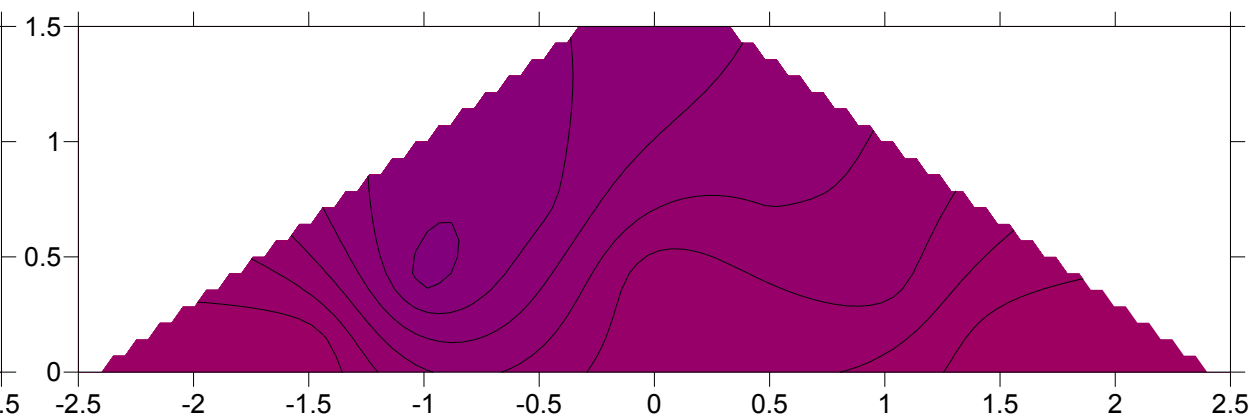

Supplement: s1 [file s1]

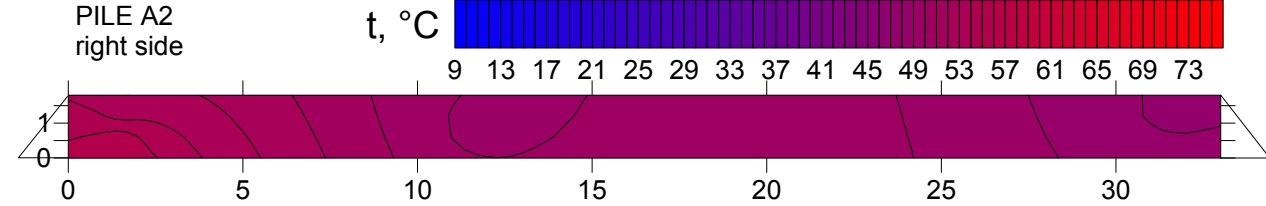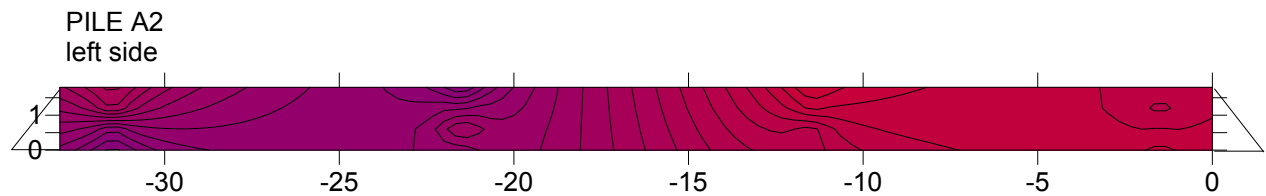

PILE A2  
length 1,5 m

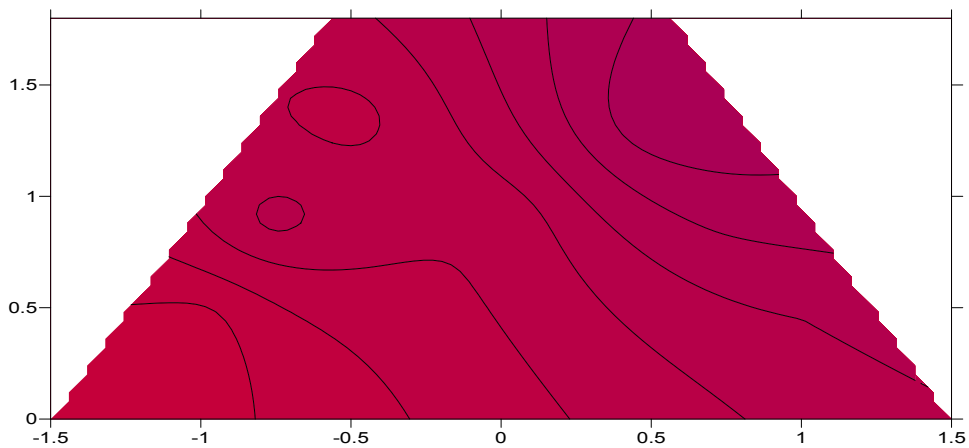

PILE A2  
length 11,5 m

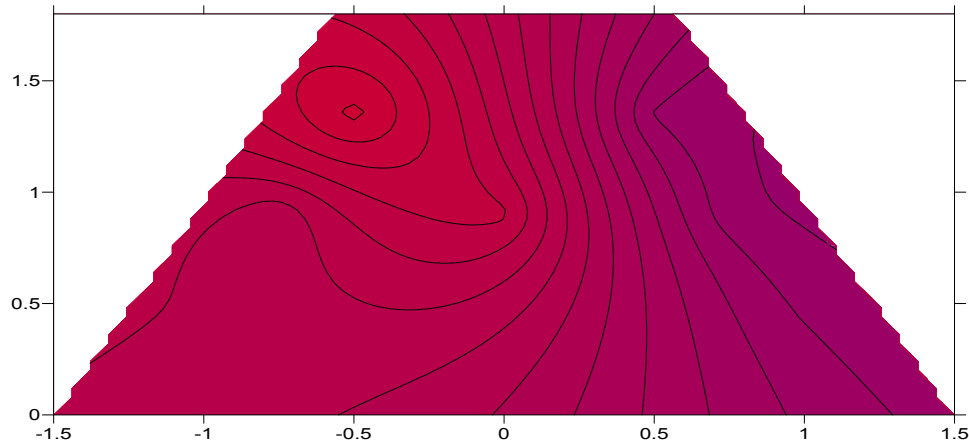

PILE A2  
length 21,5 m

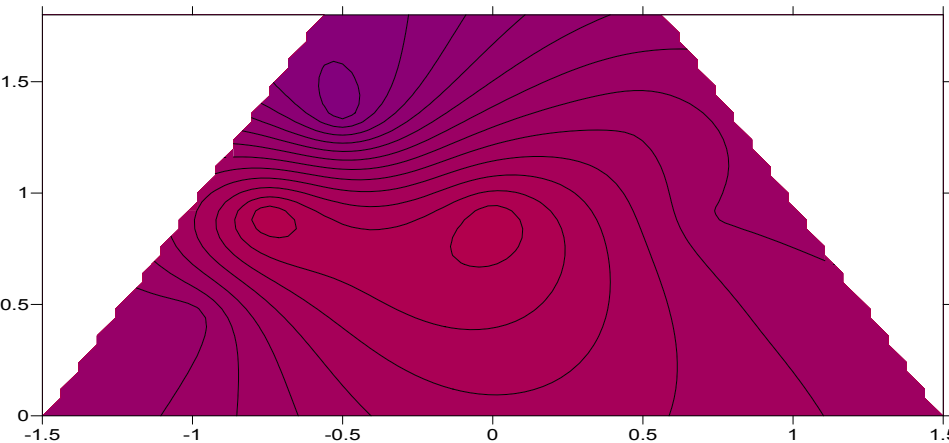

PILE A2  
length 31,5 m

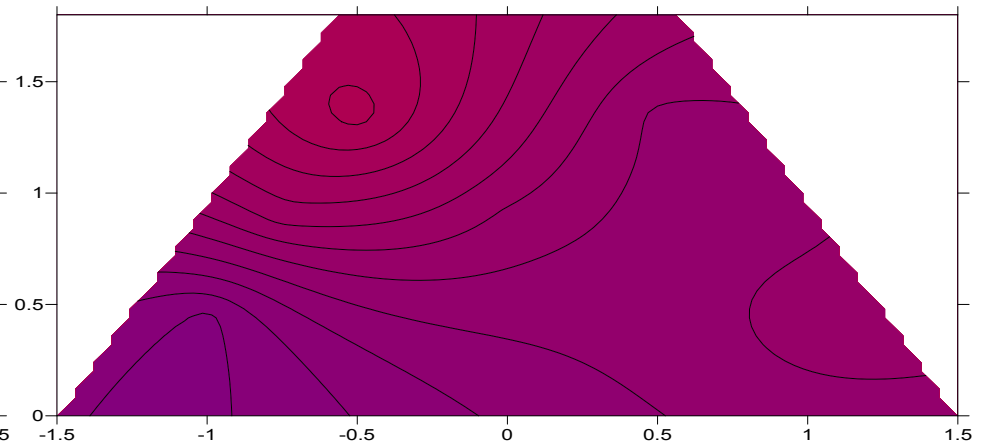

Supplement: s1 [file s1]

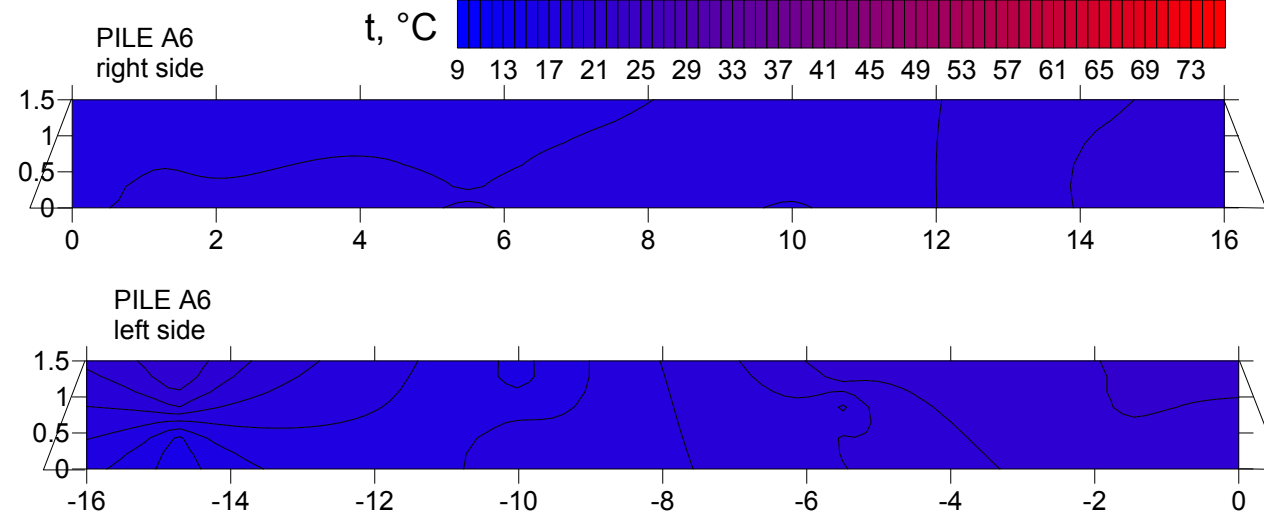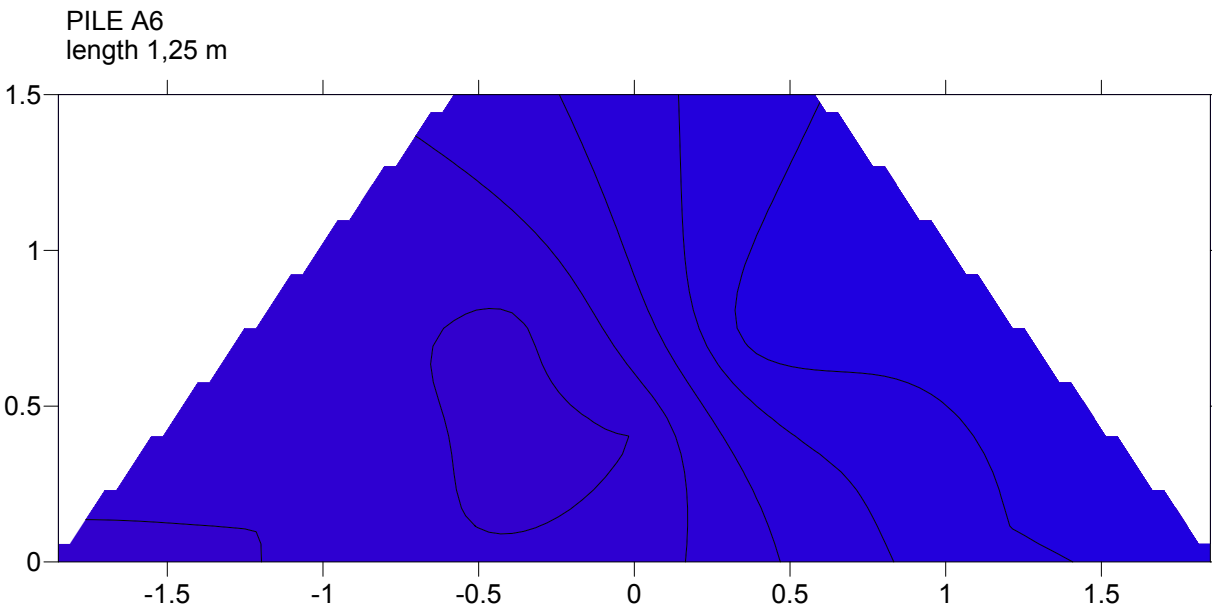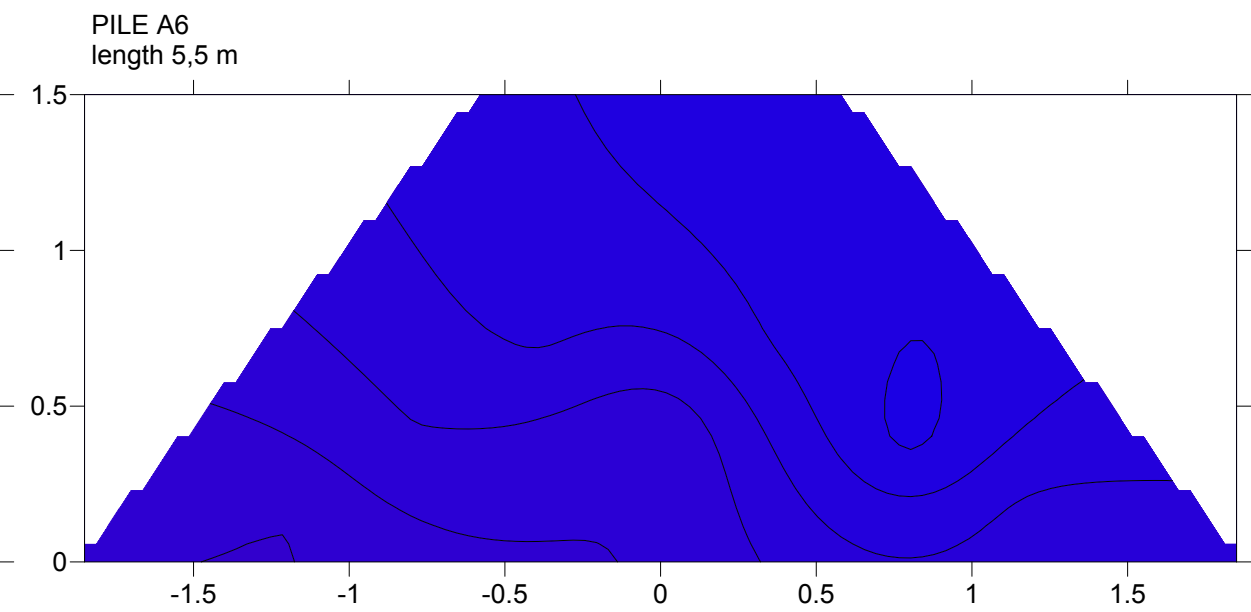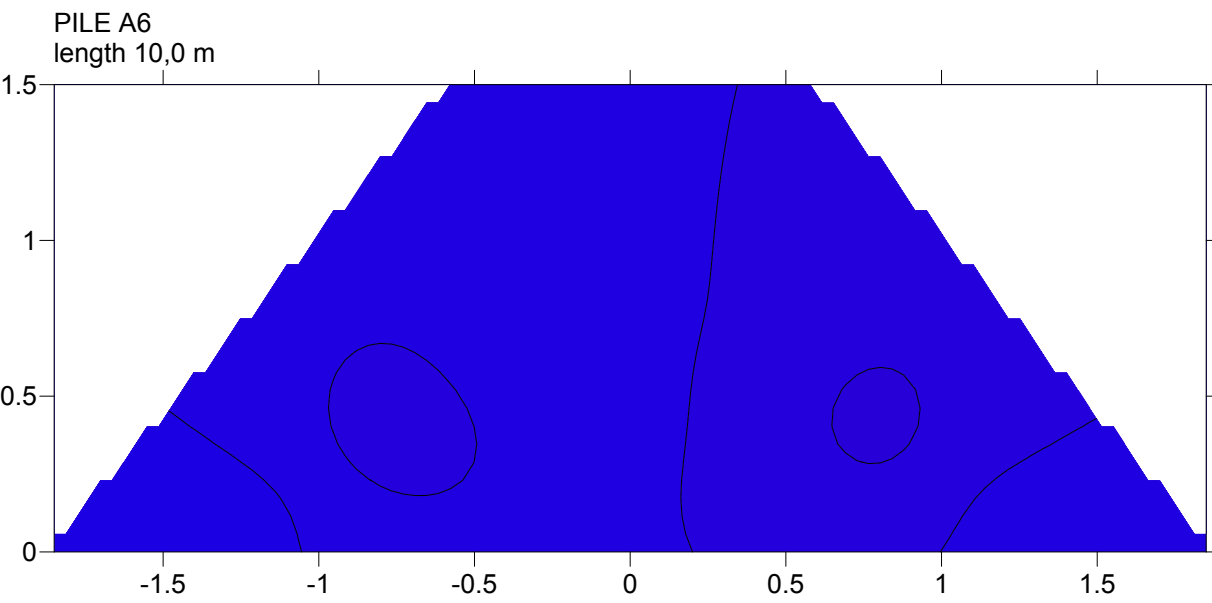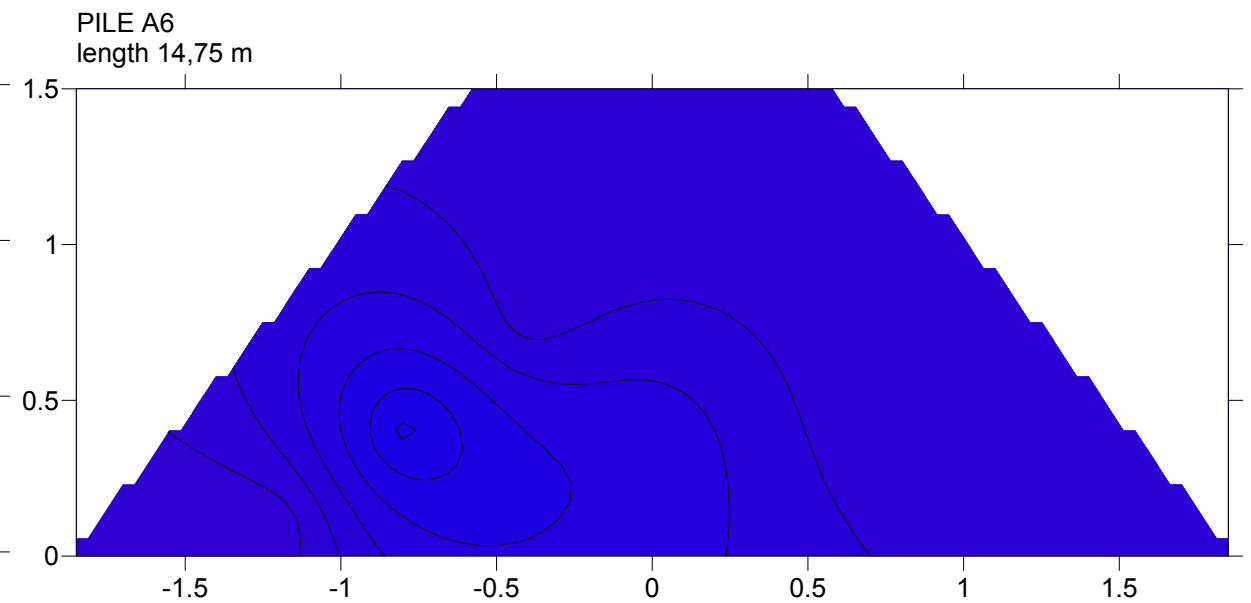

Supplement: s1 [file s1]

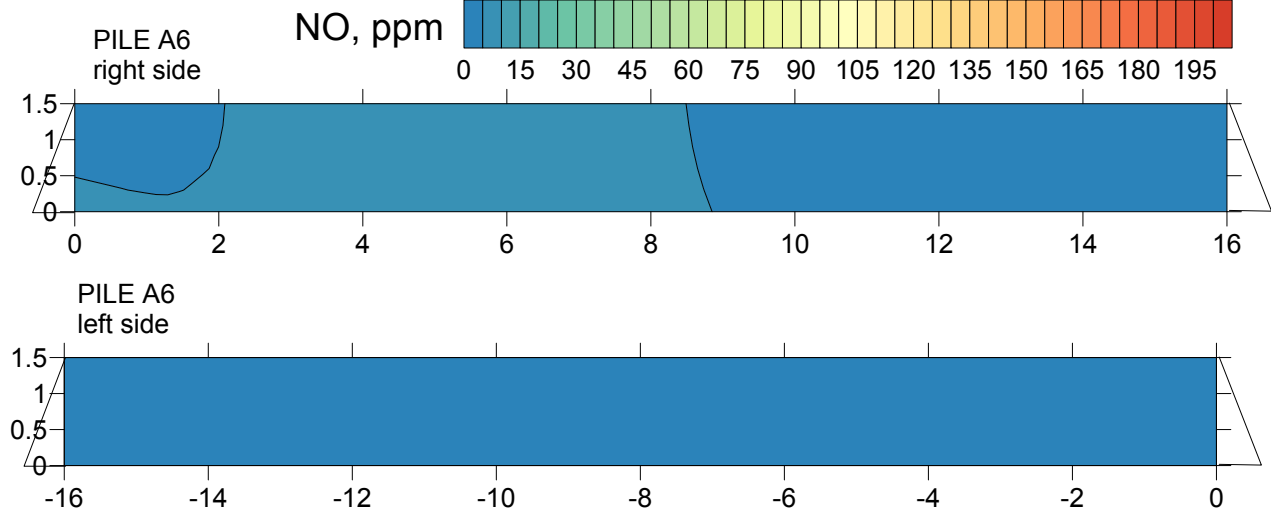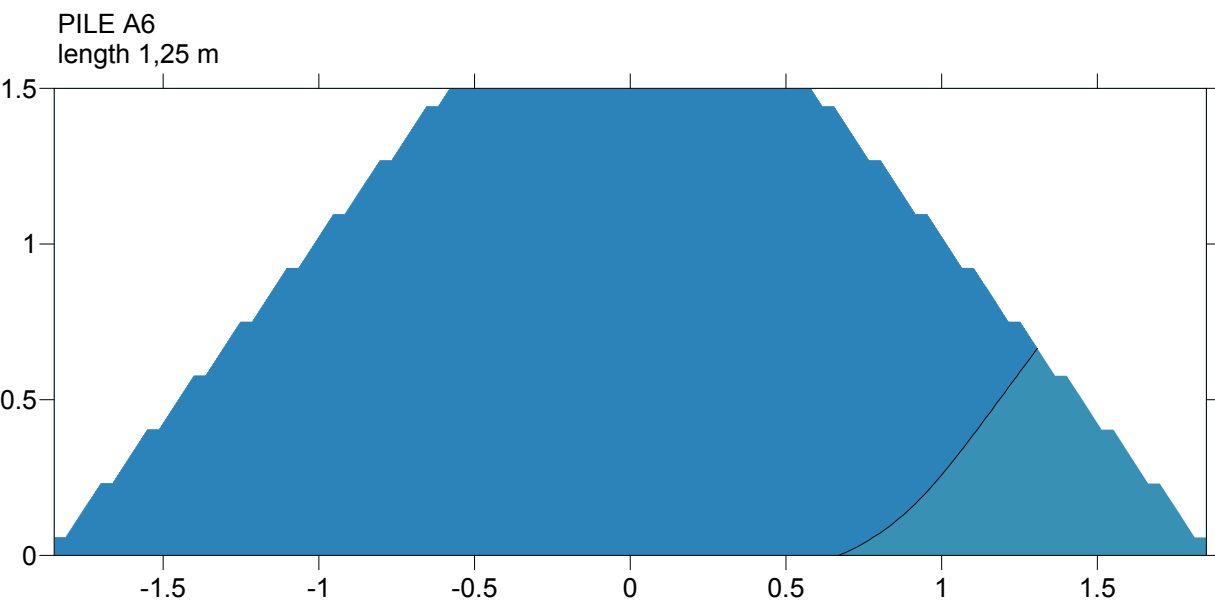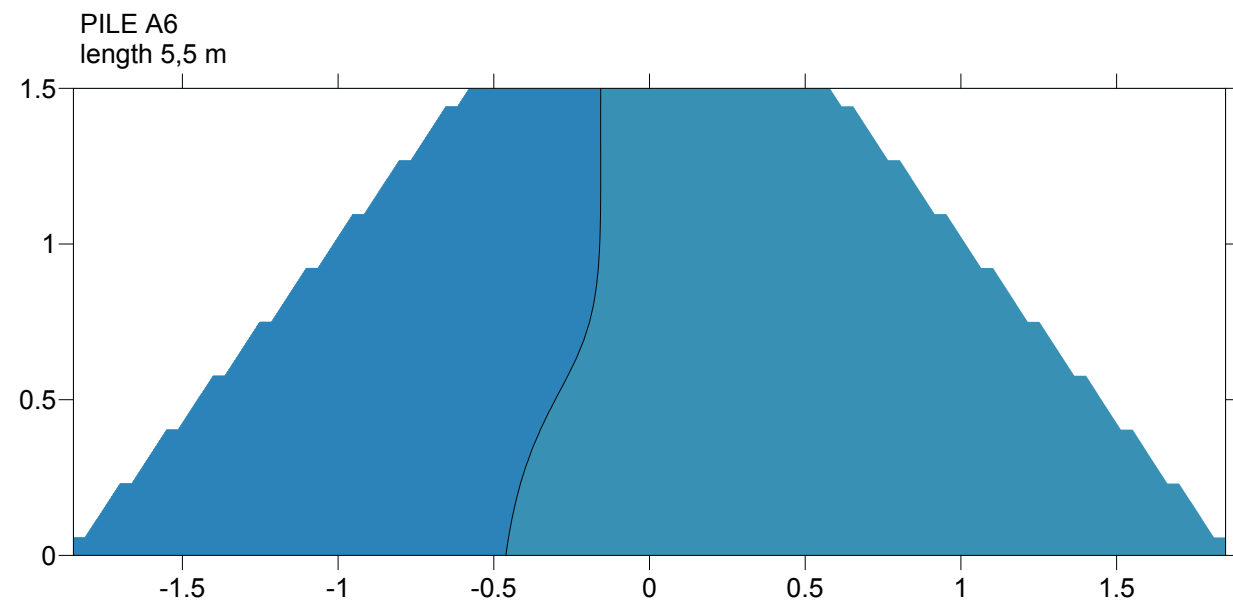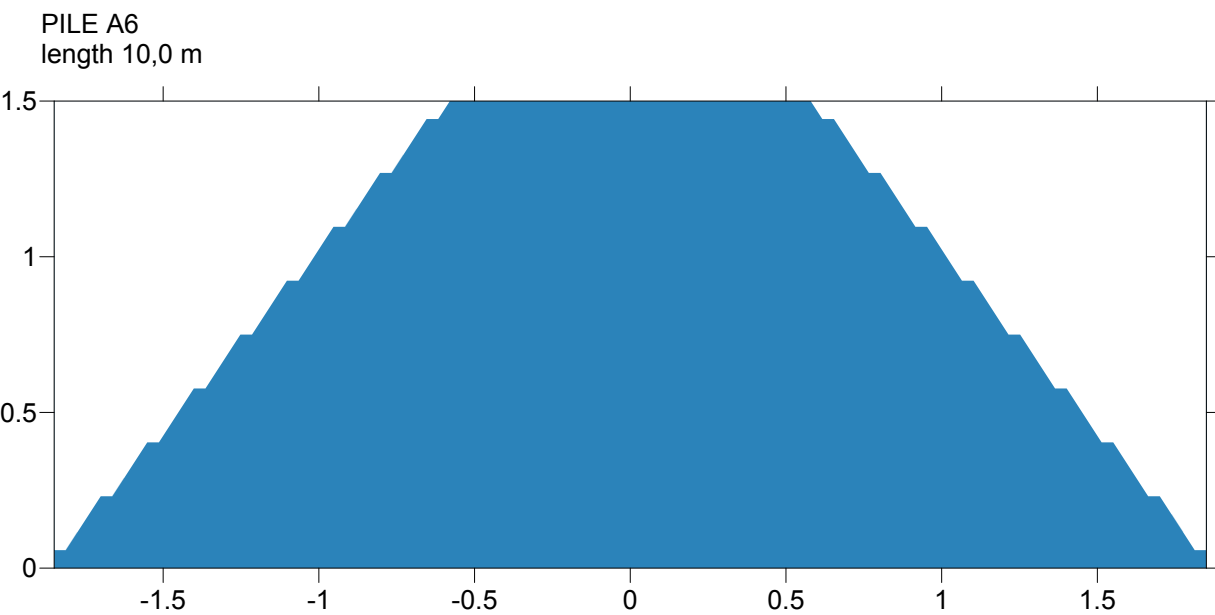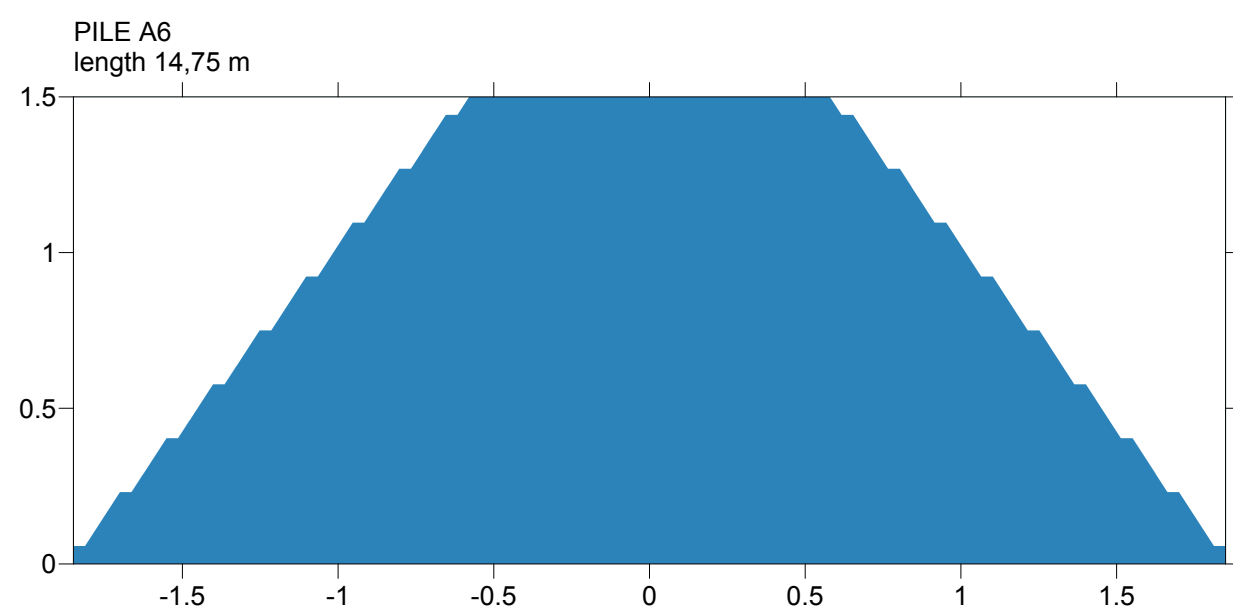

Supplement: s1 [file s1]

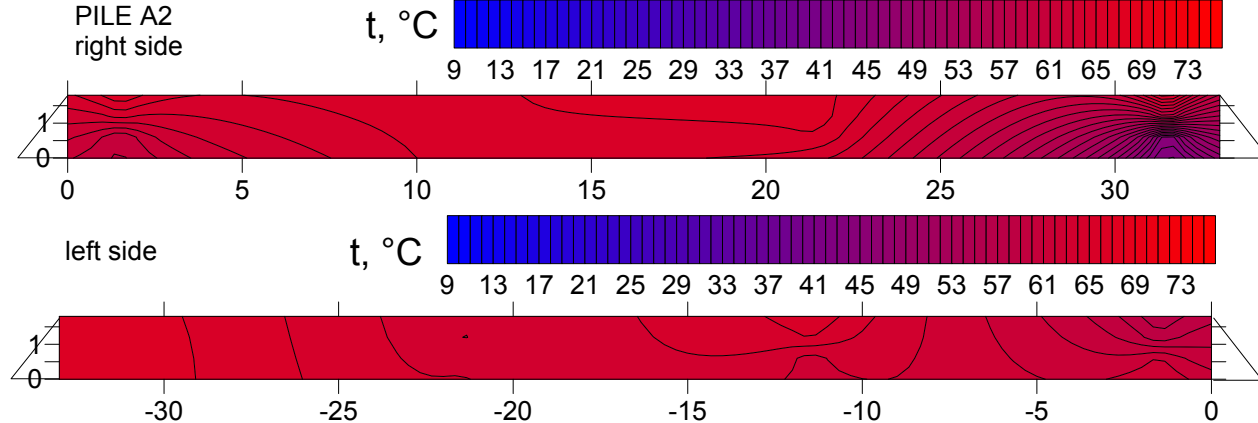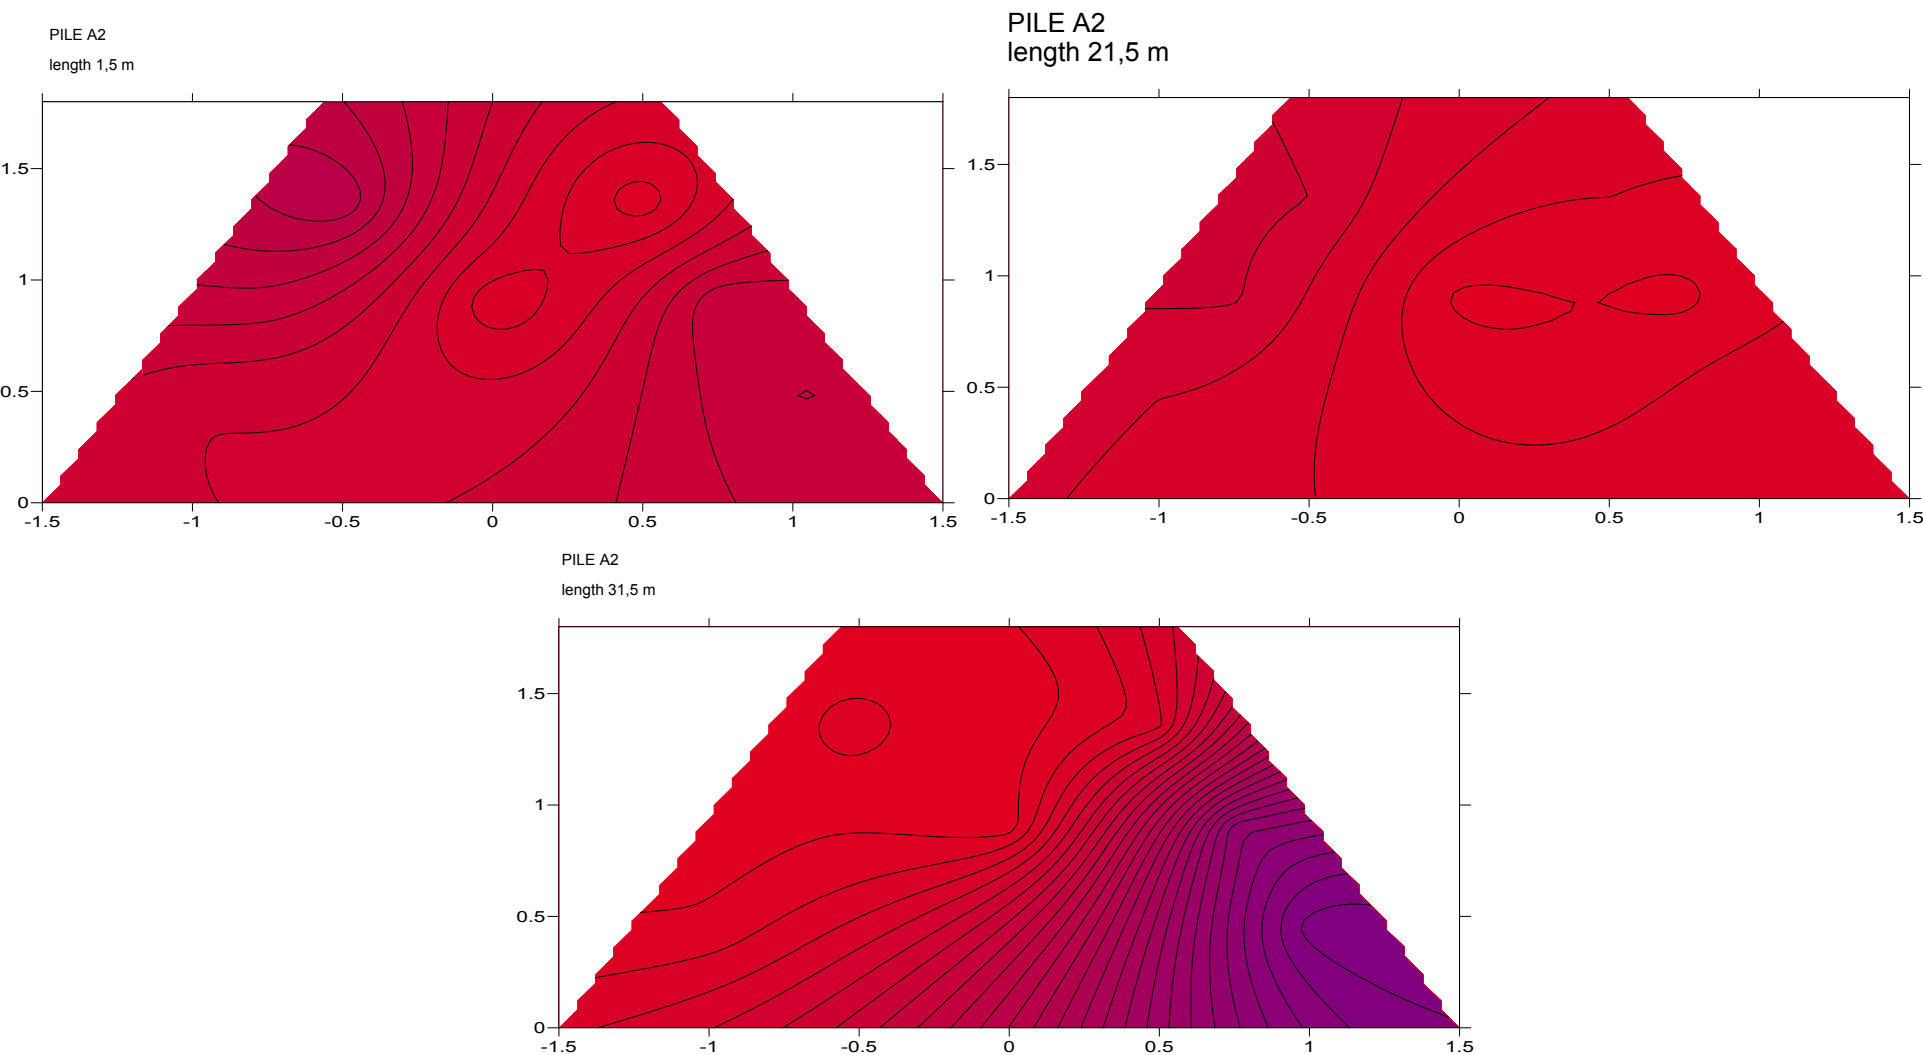

Supplement: s1 [file s1]

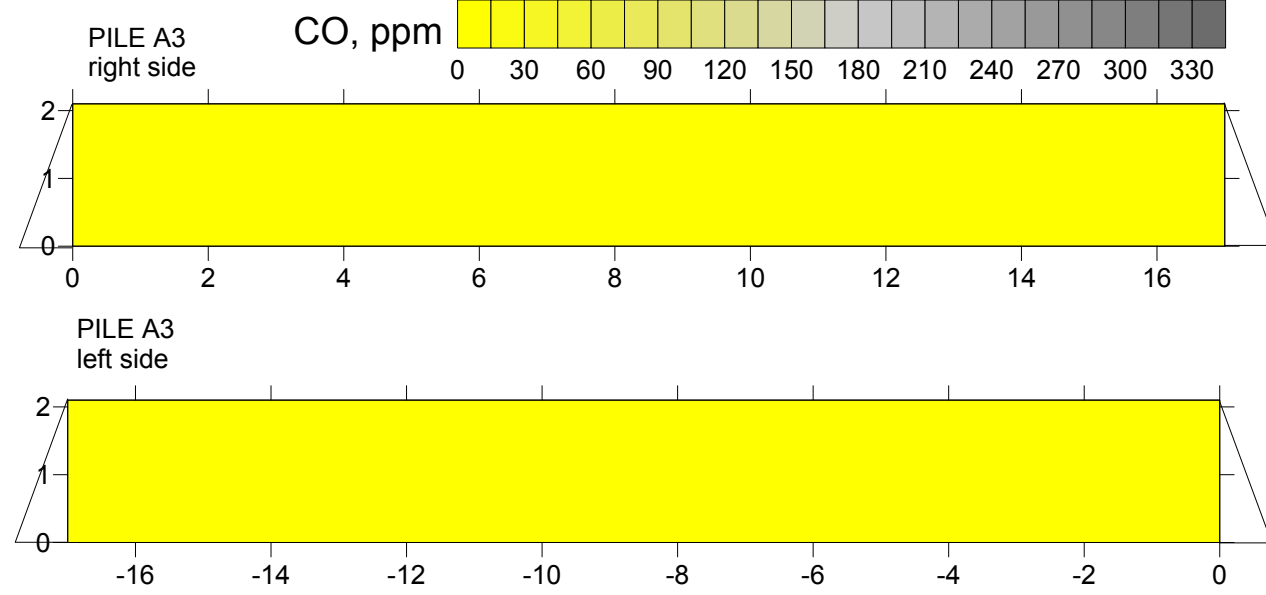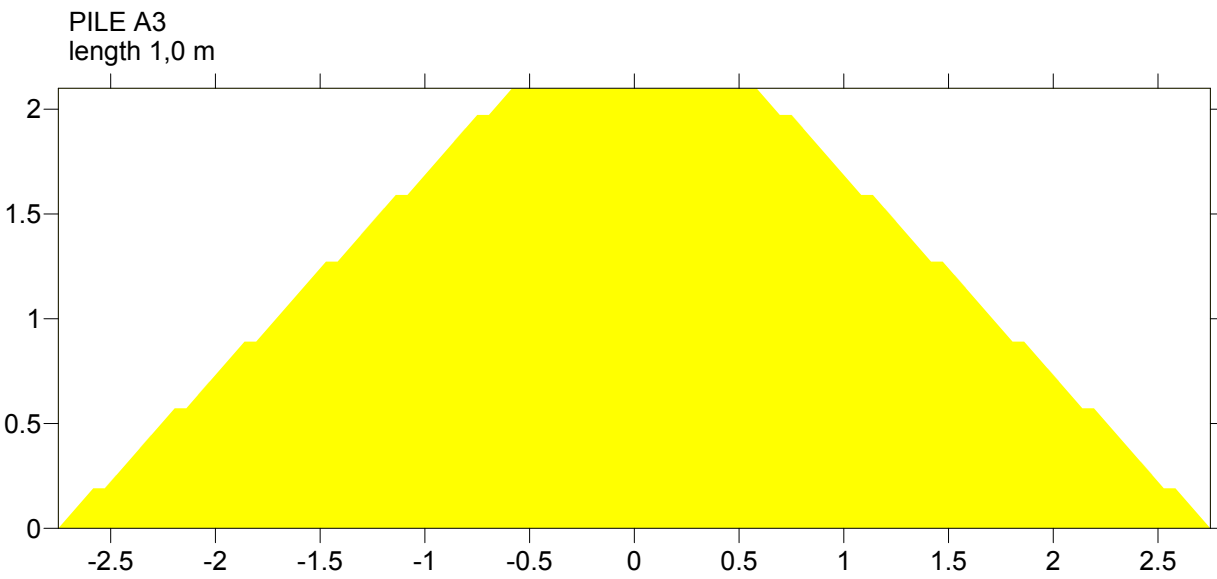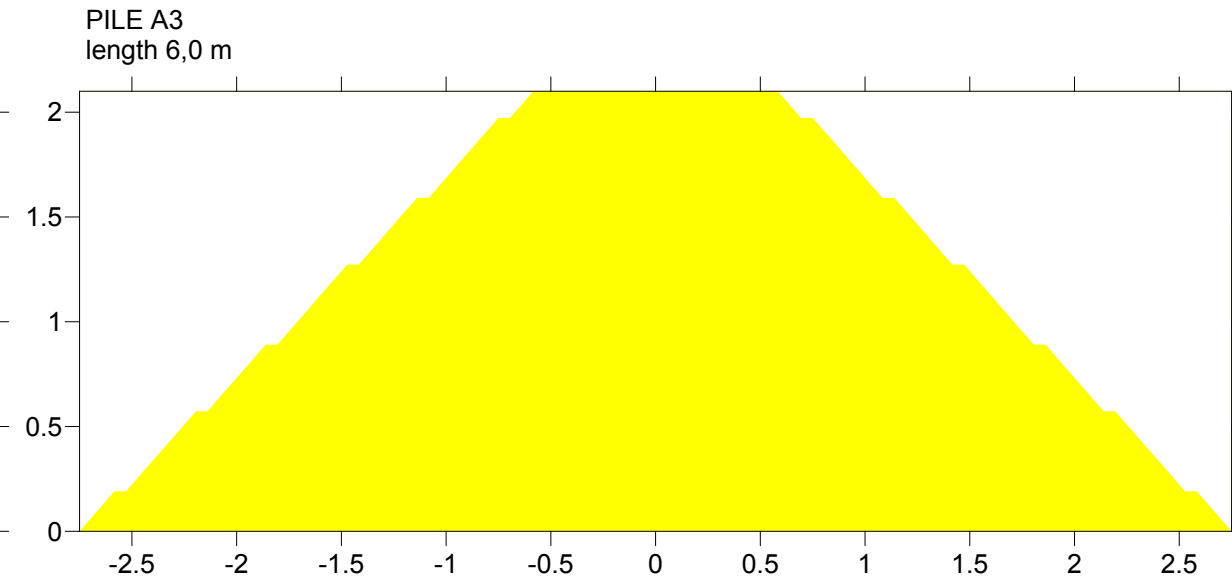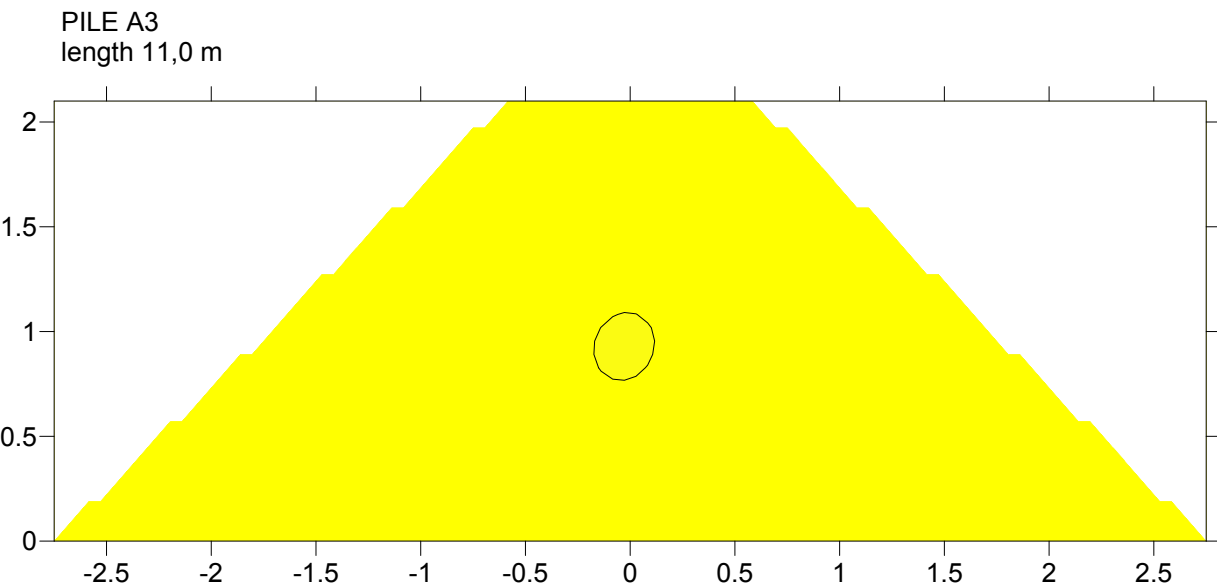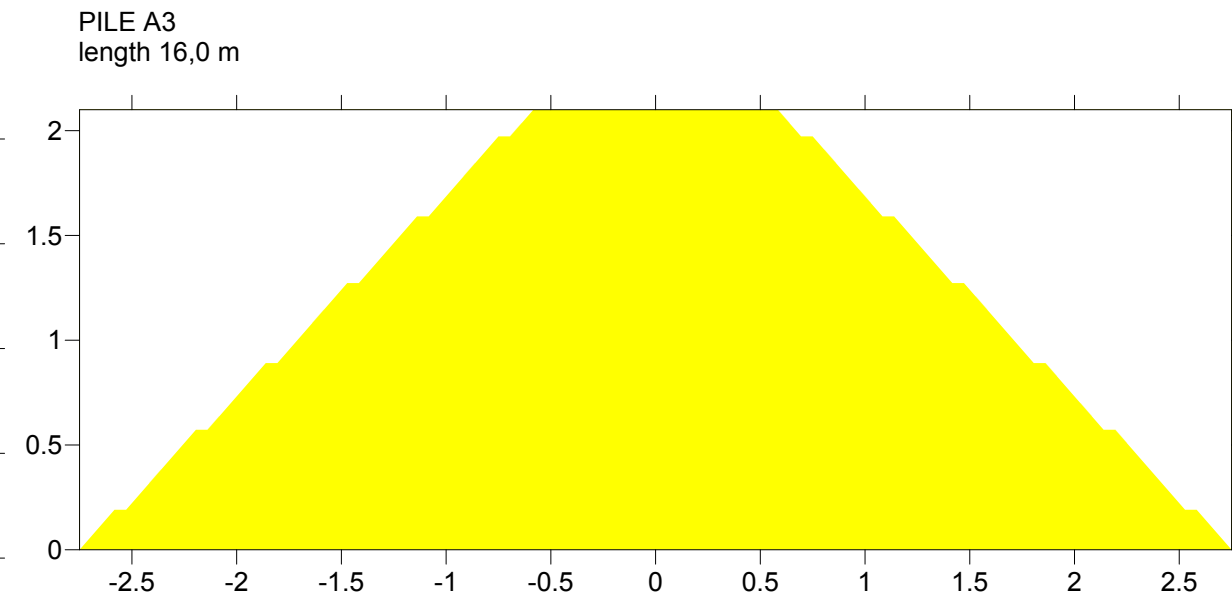

Supplement: s1 [file s1]

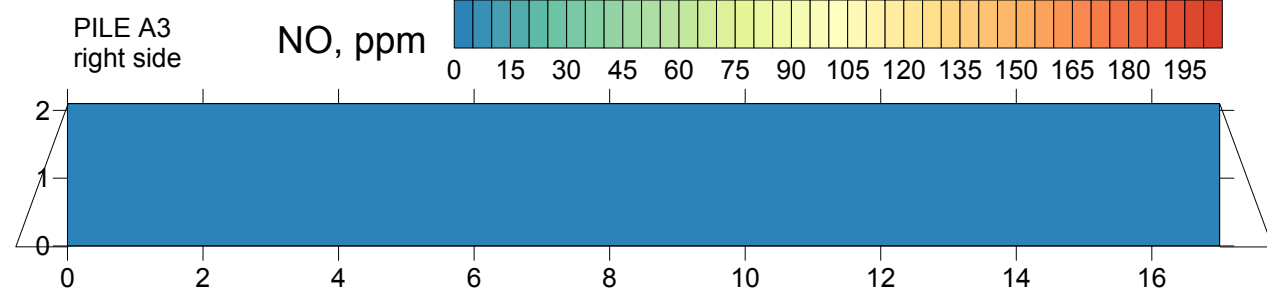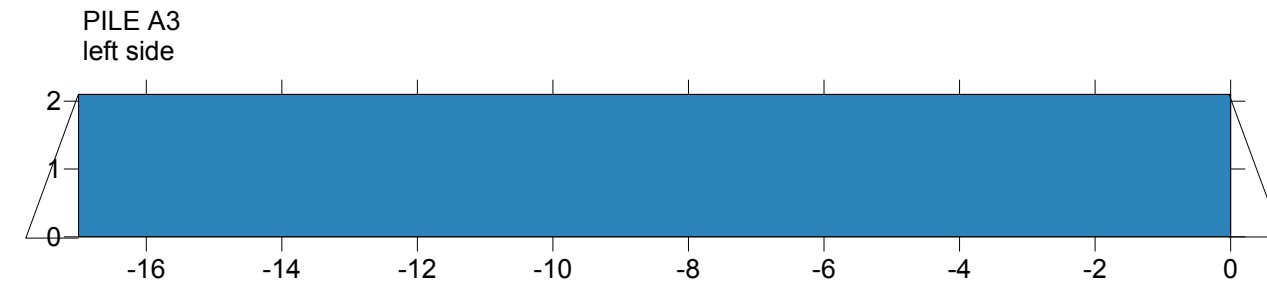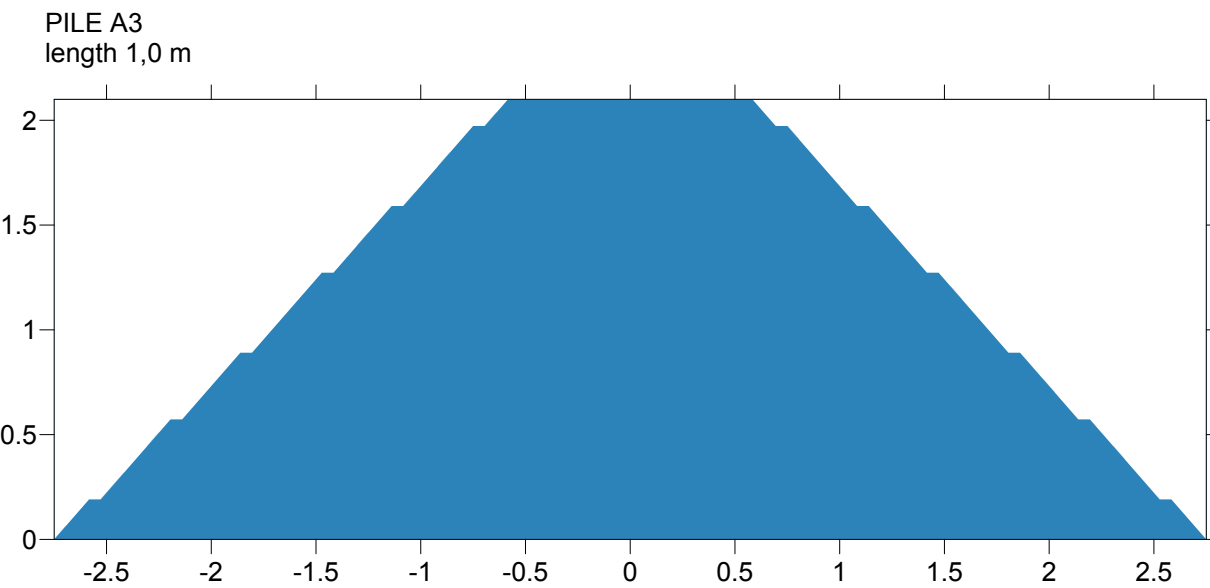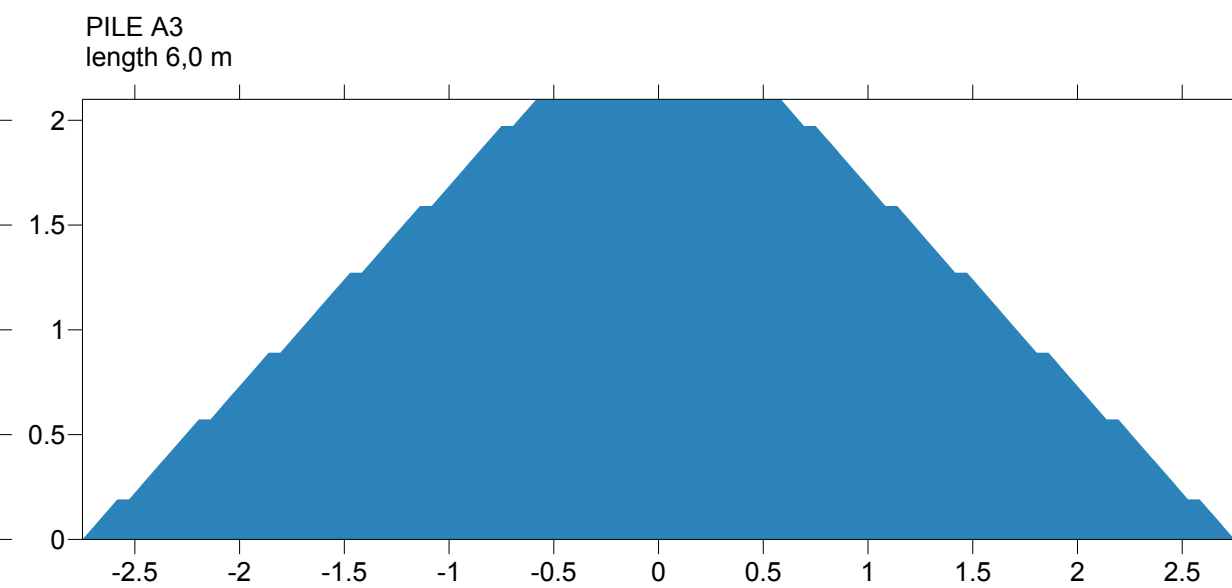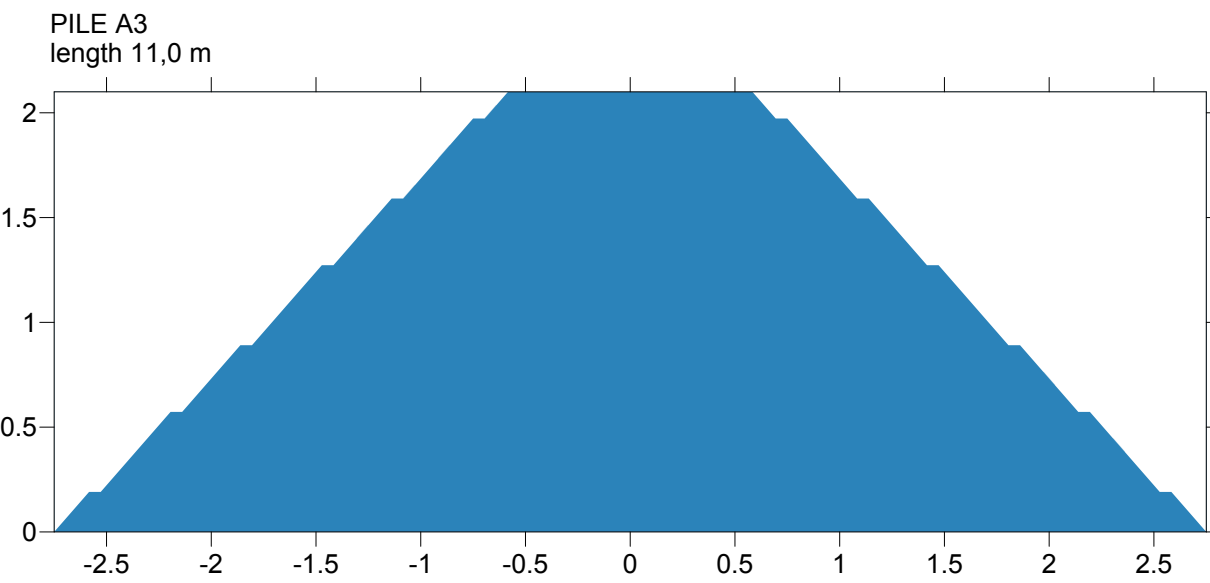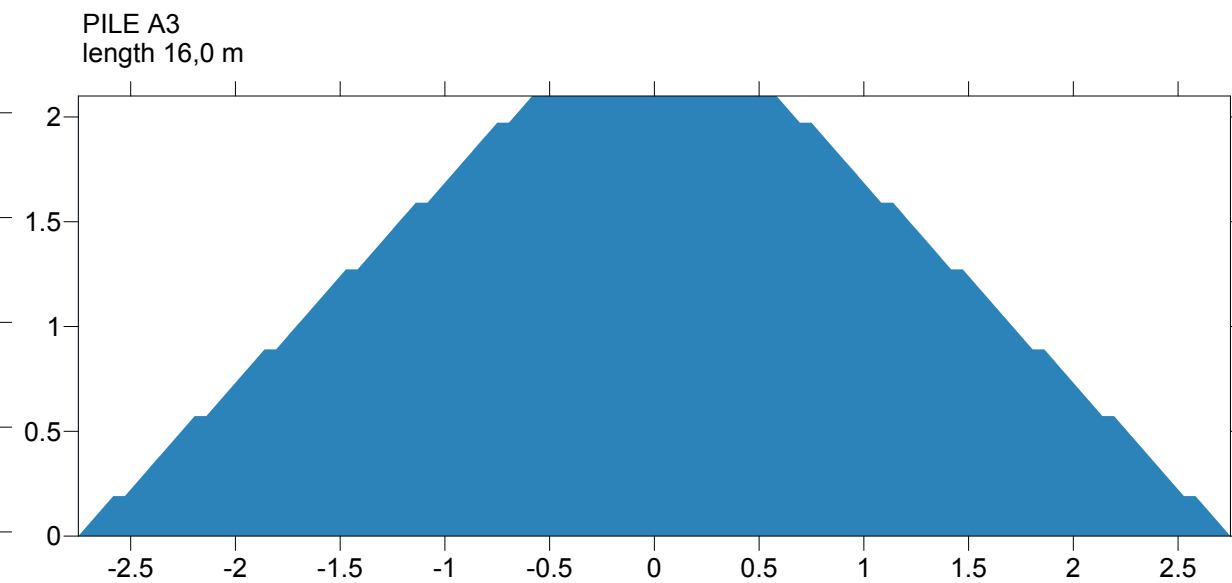

Supplement: s1 [file s1]

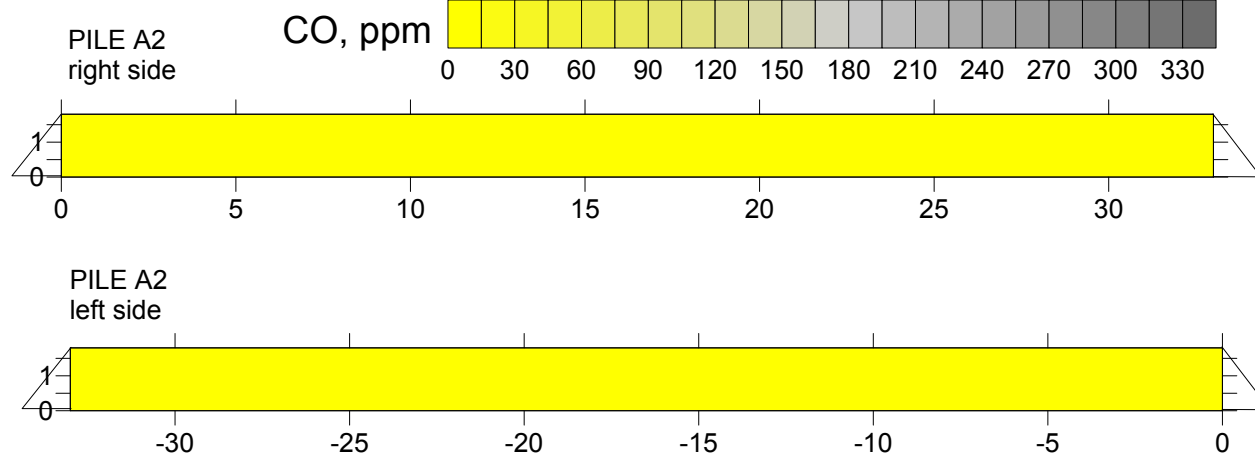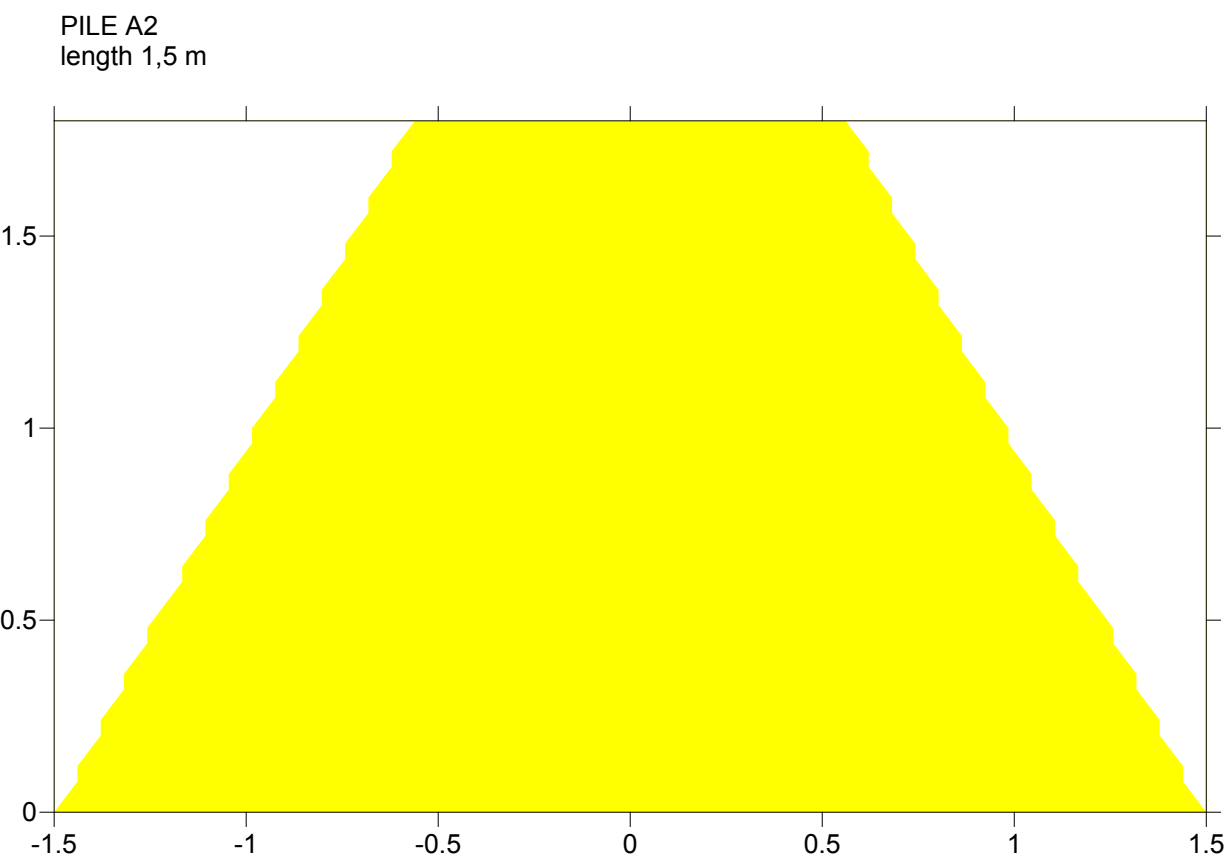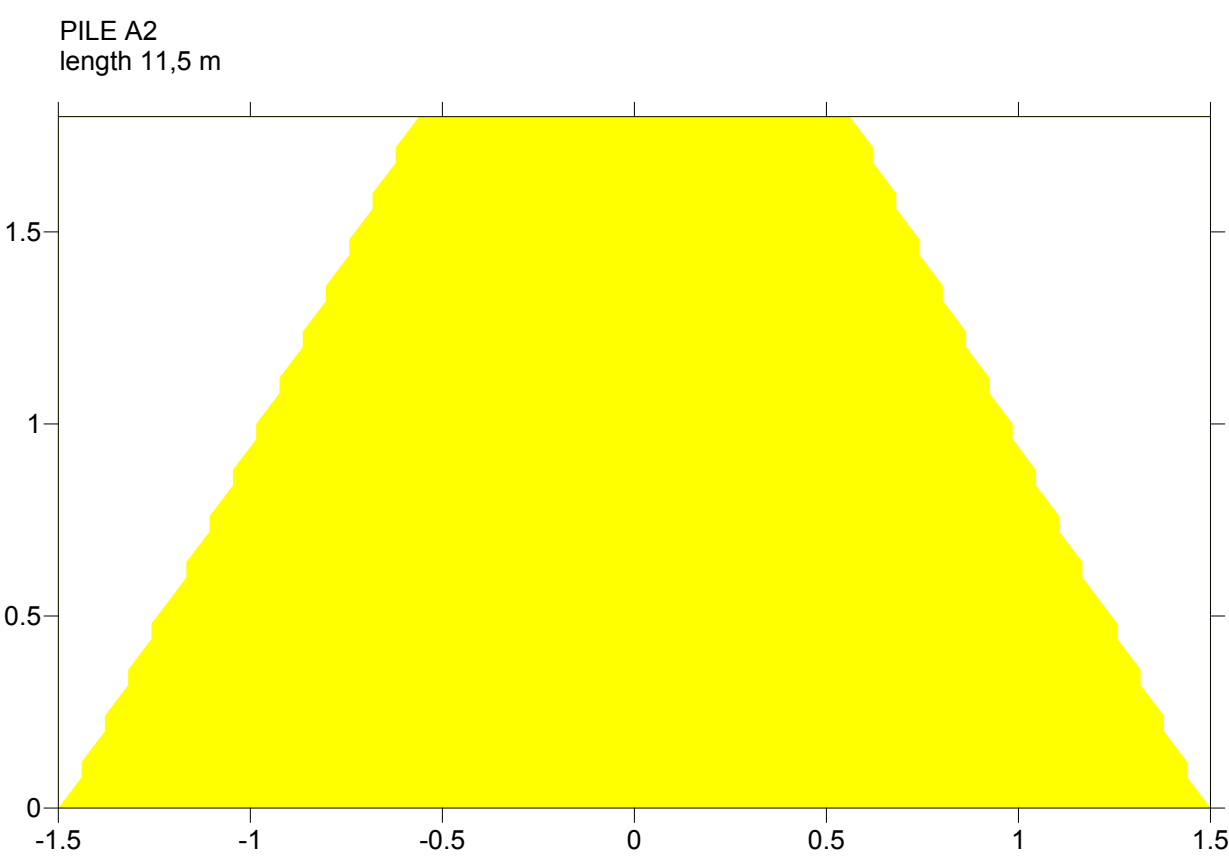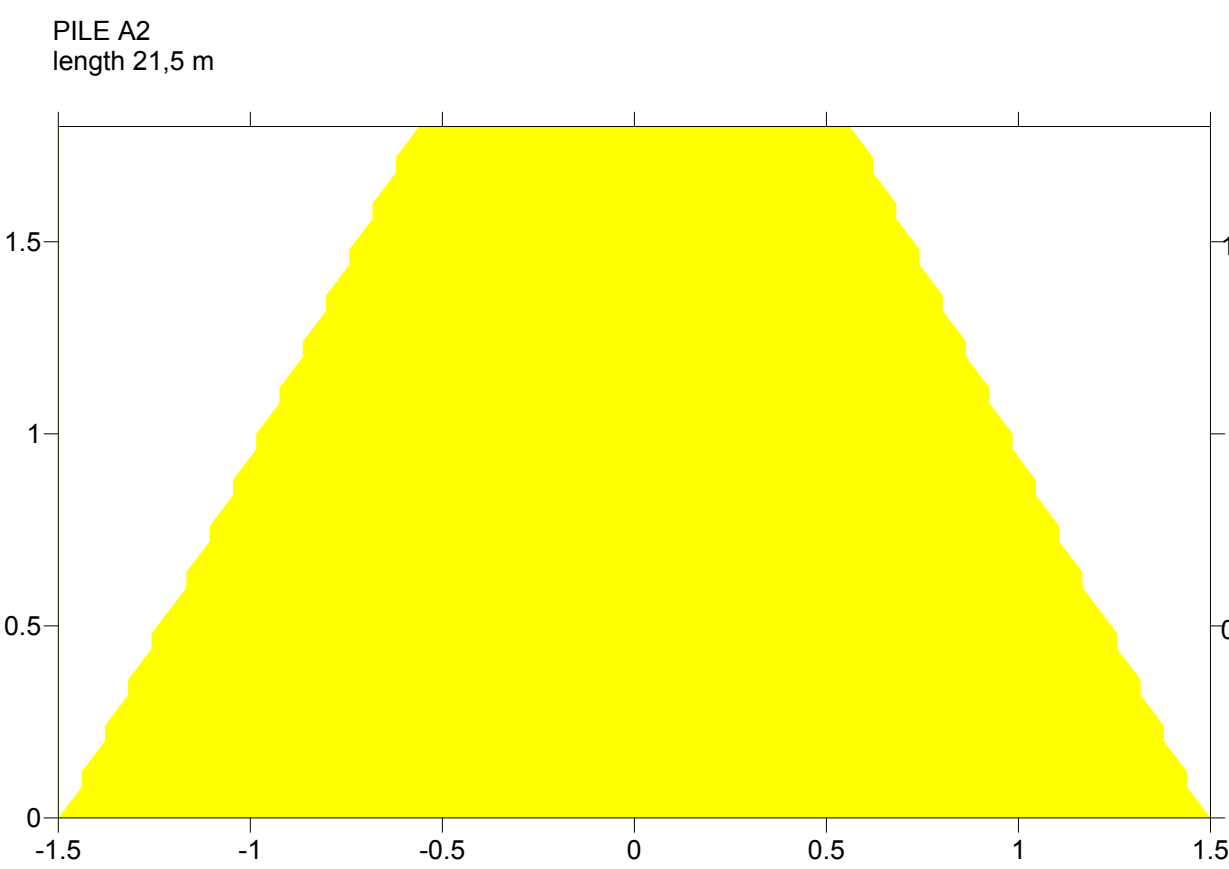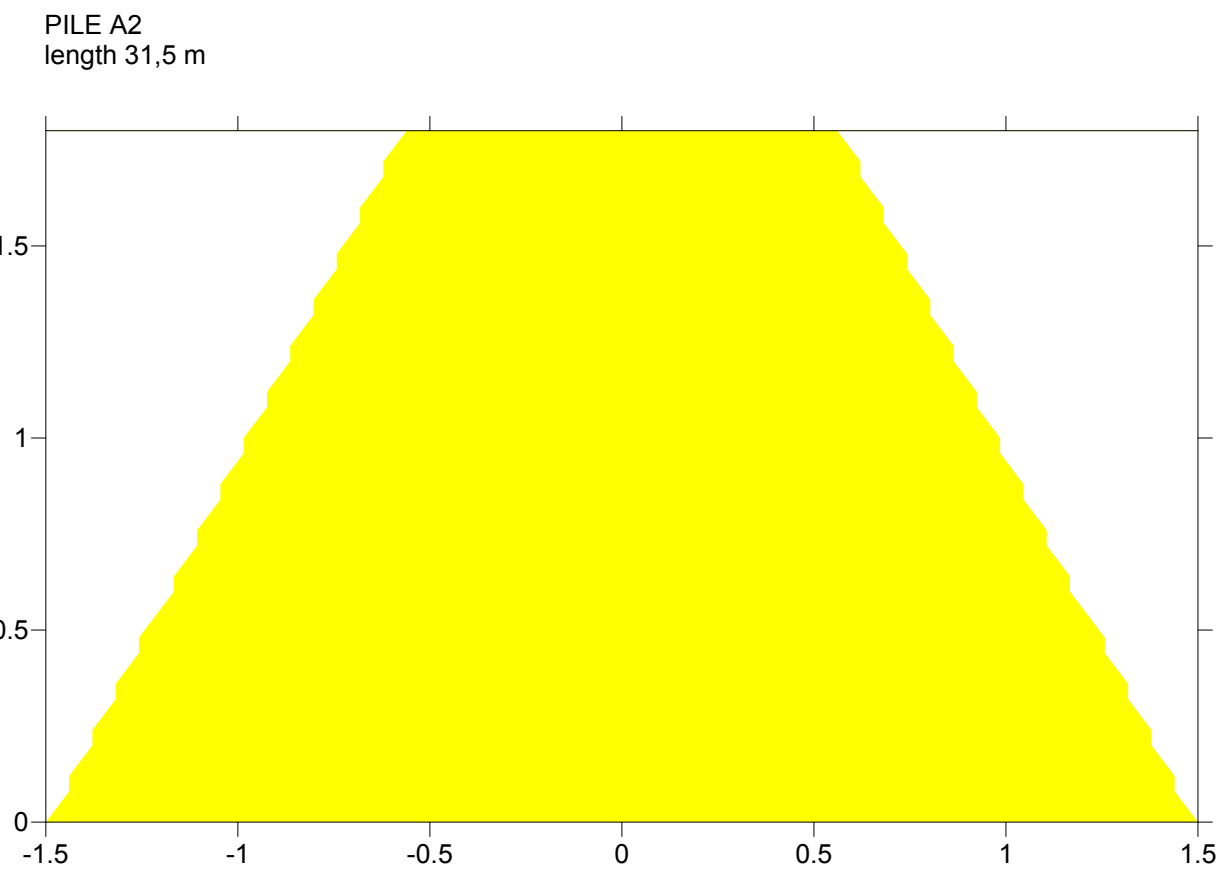

Supplement: s1 [file s1]

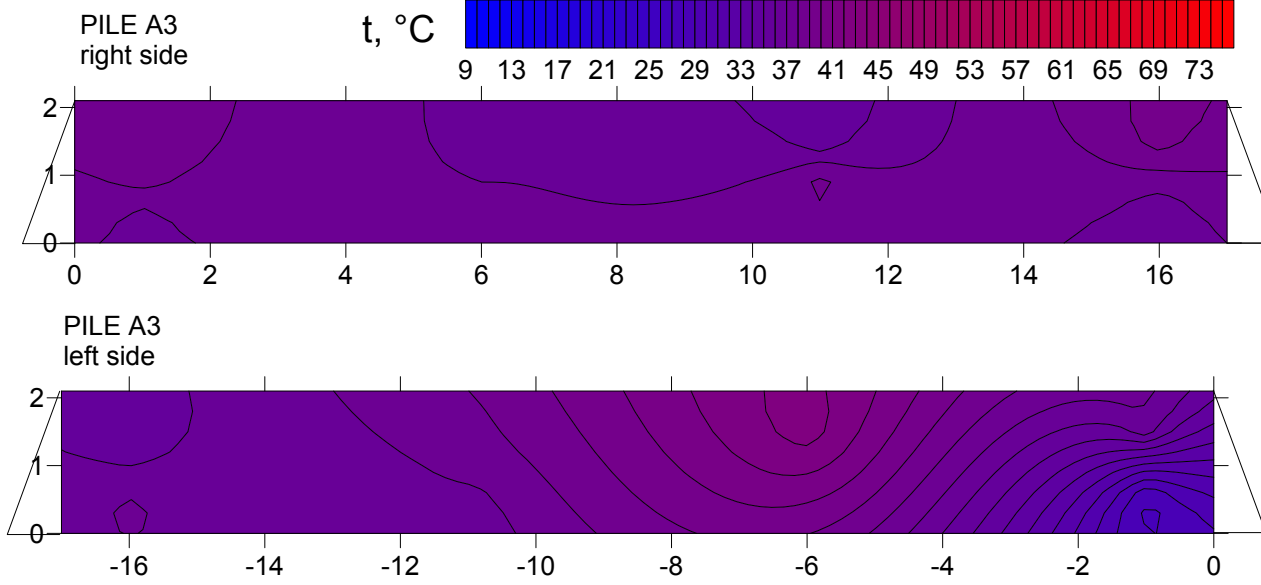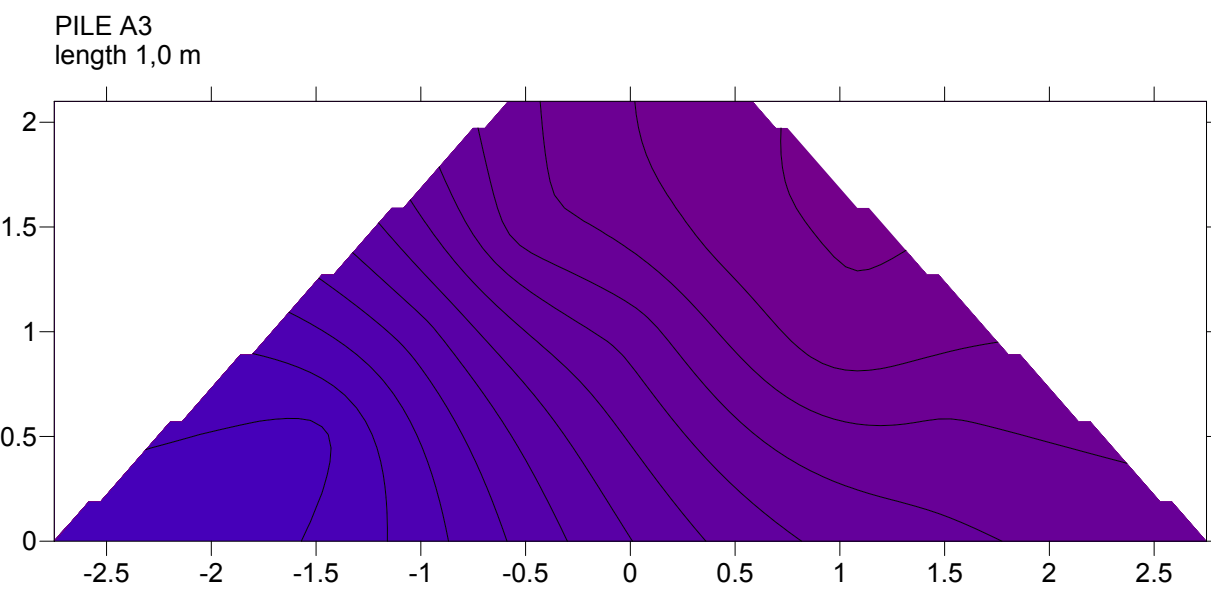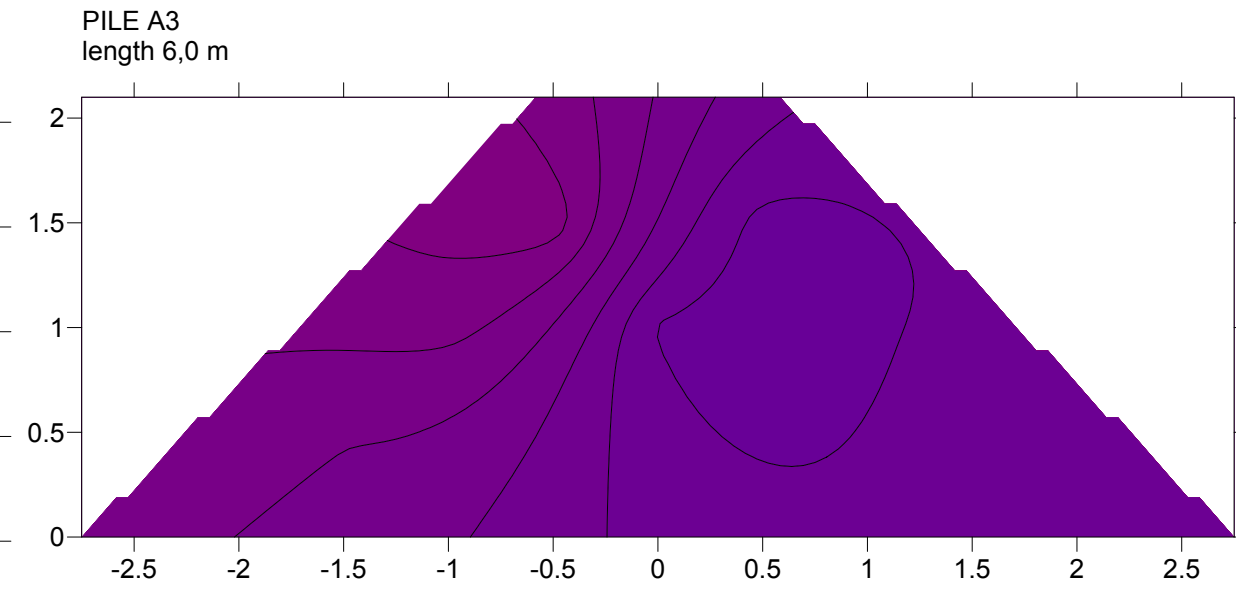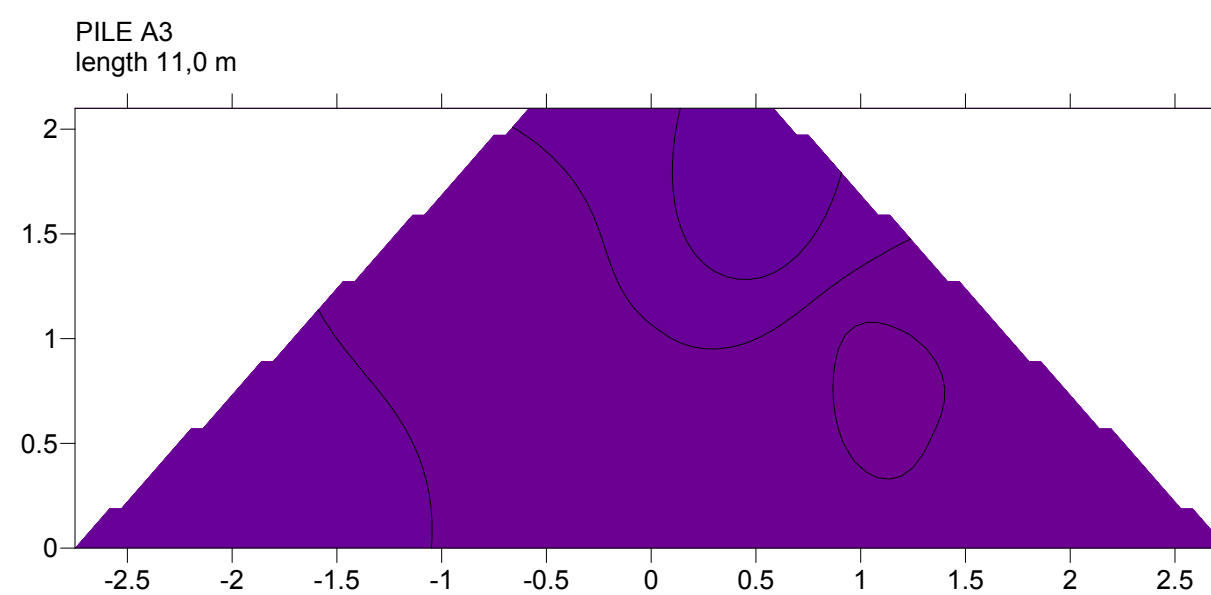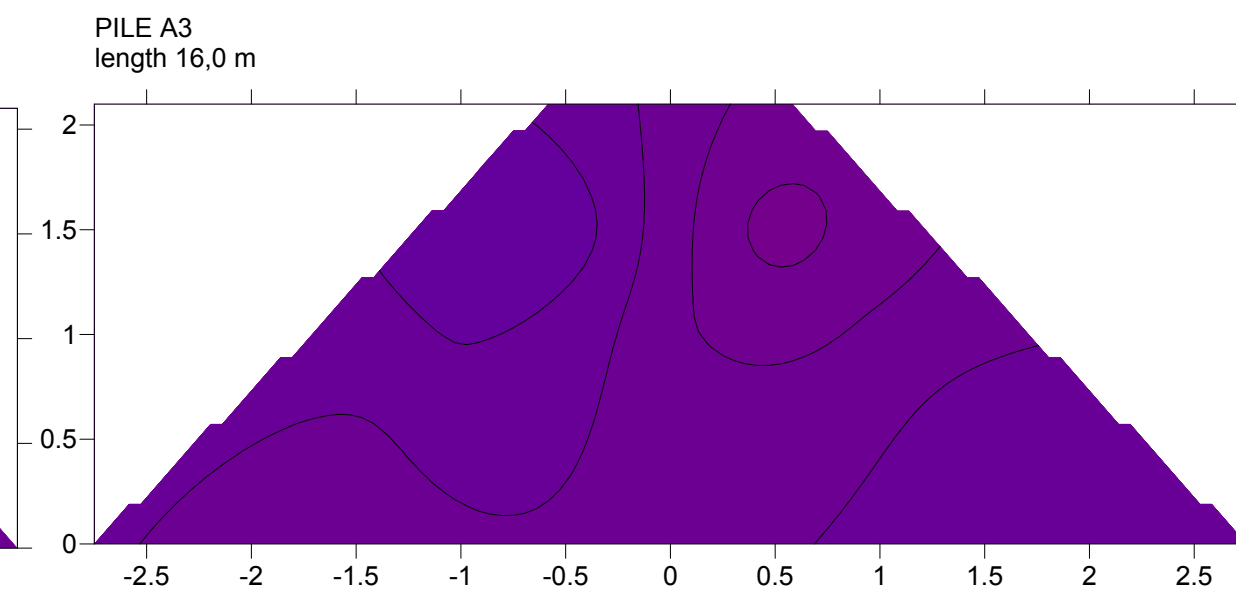

Supplement: s1 [file s1]

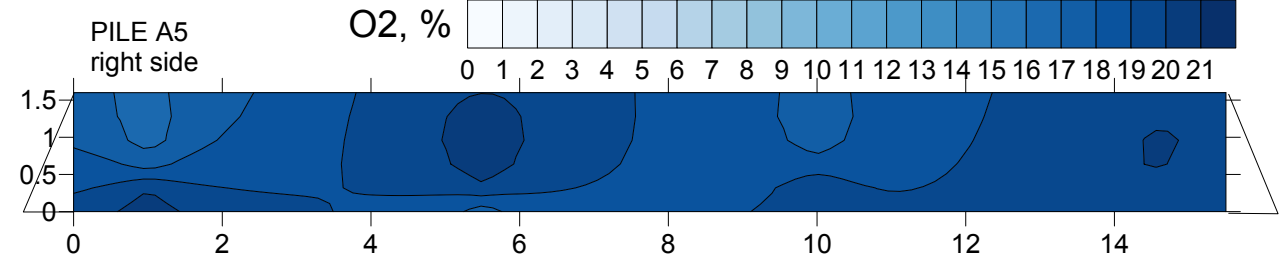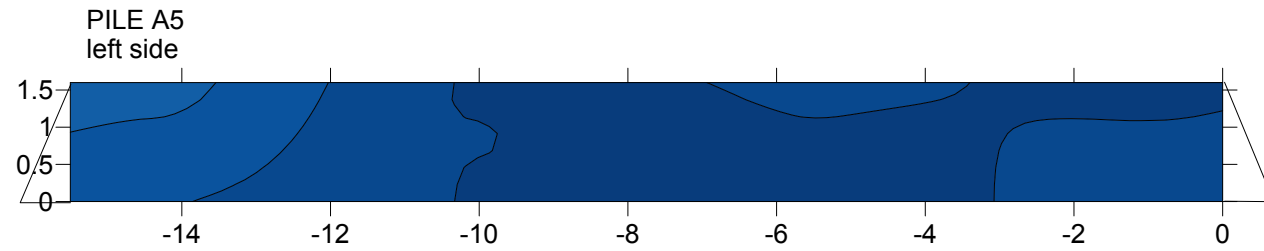

PILE A5  
length 1,0 m

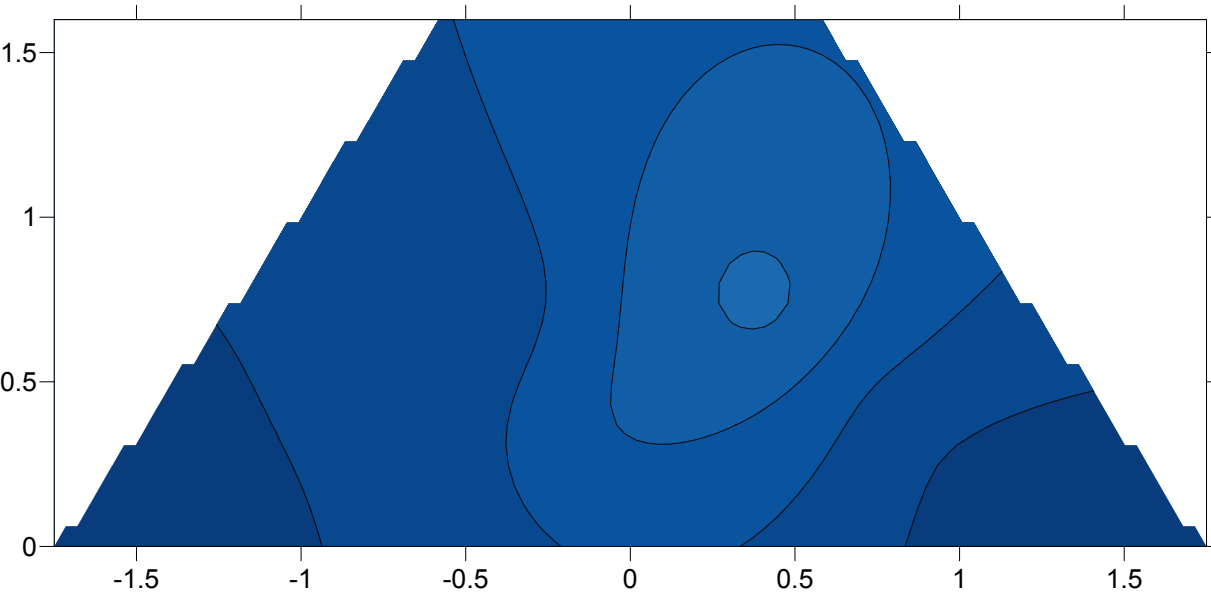

PILE A5  
length 5,5 m

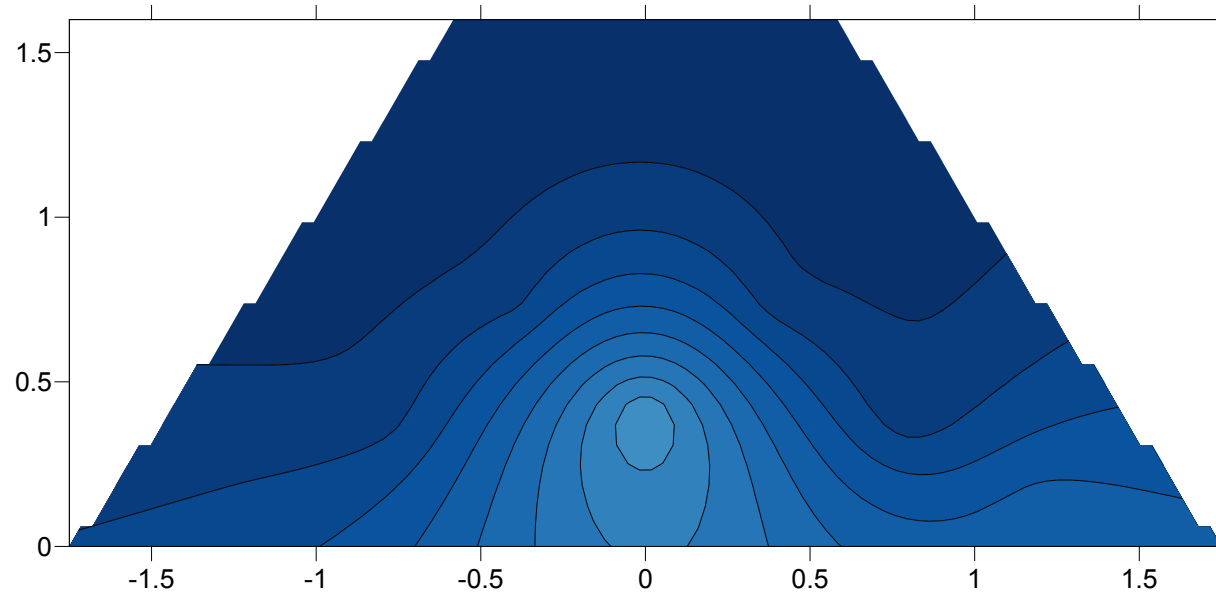

PILE A5  
length 10,0 m

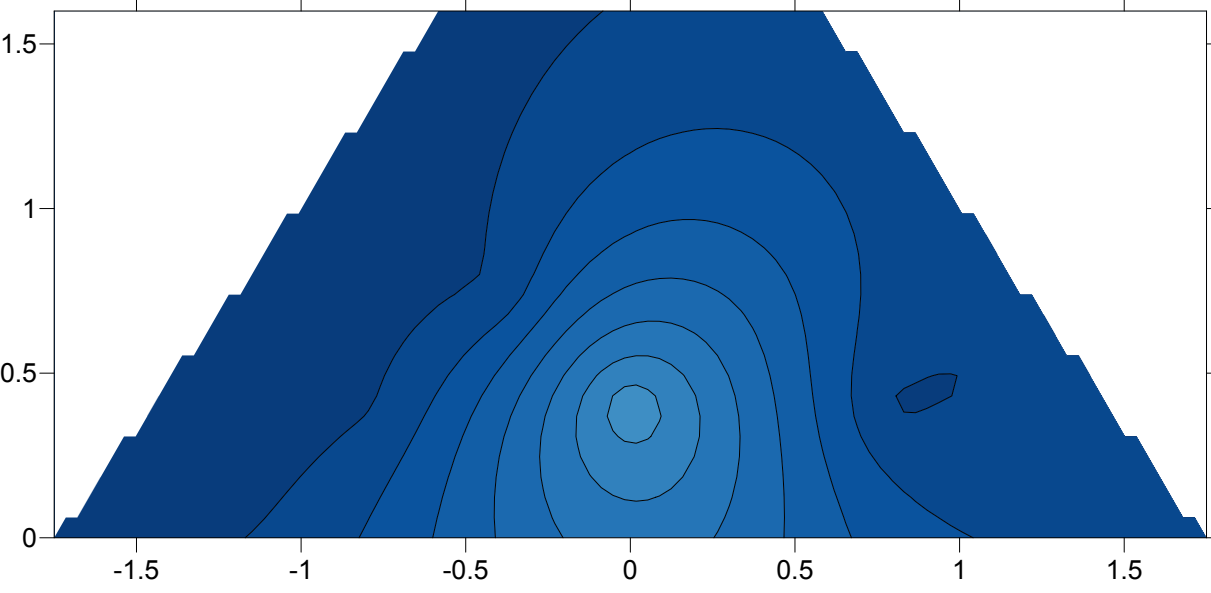

PILE A5  
length 14,5 m

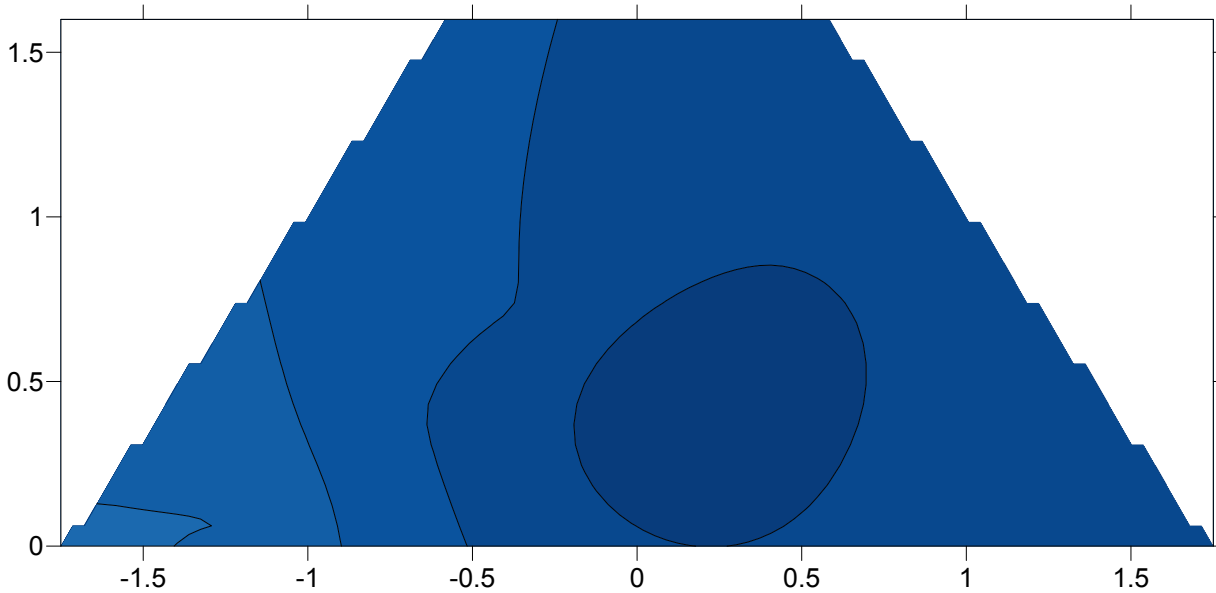

Supplement: s1 [file s1]

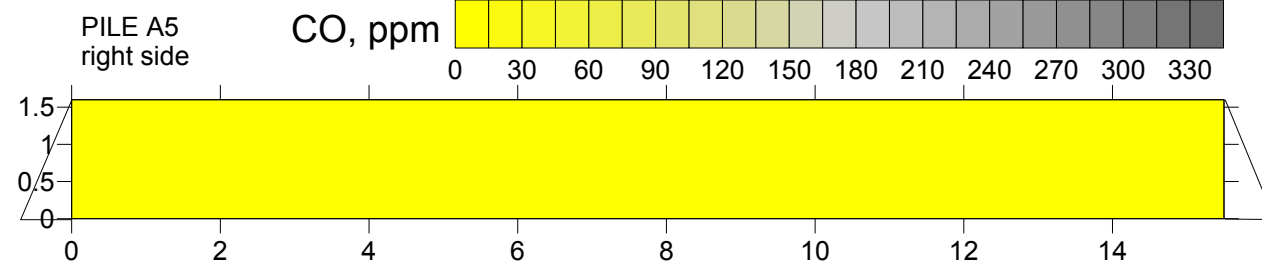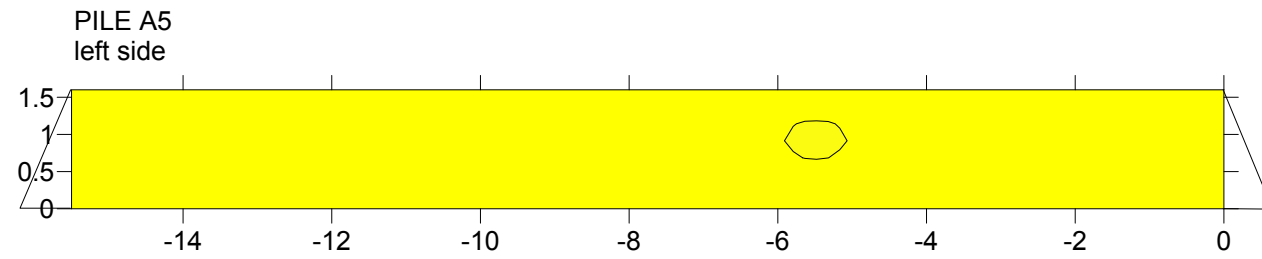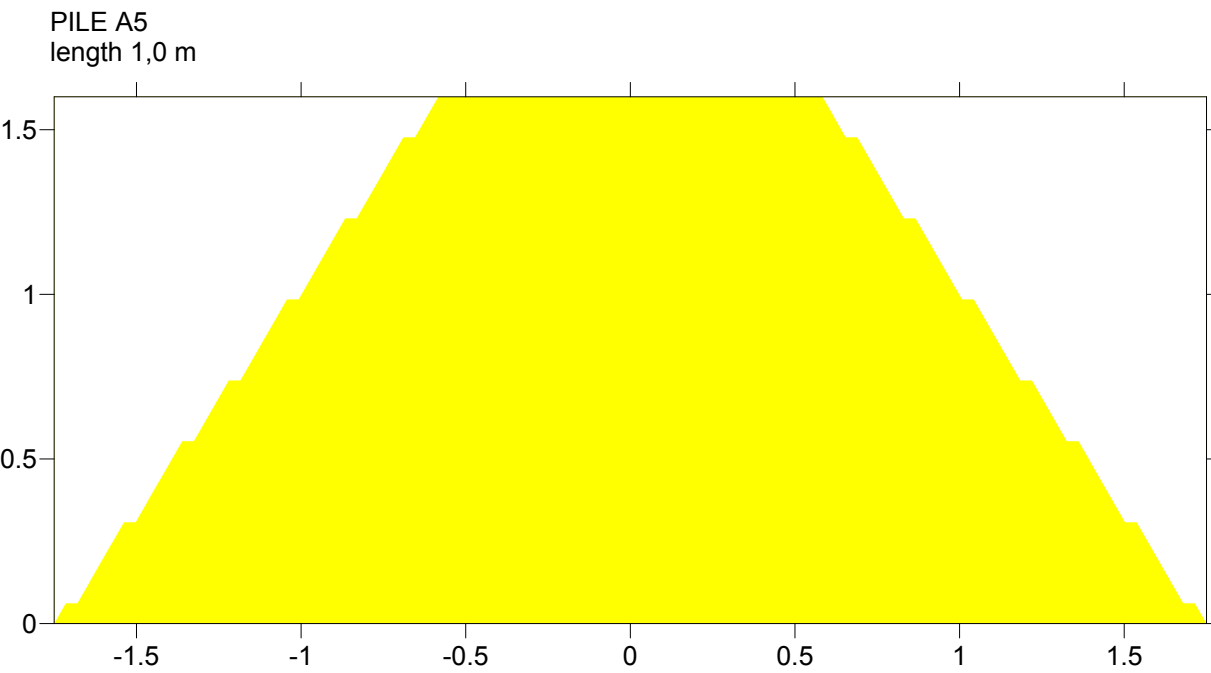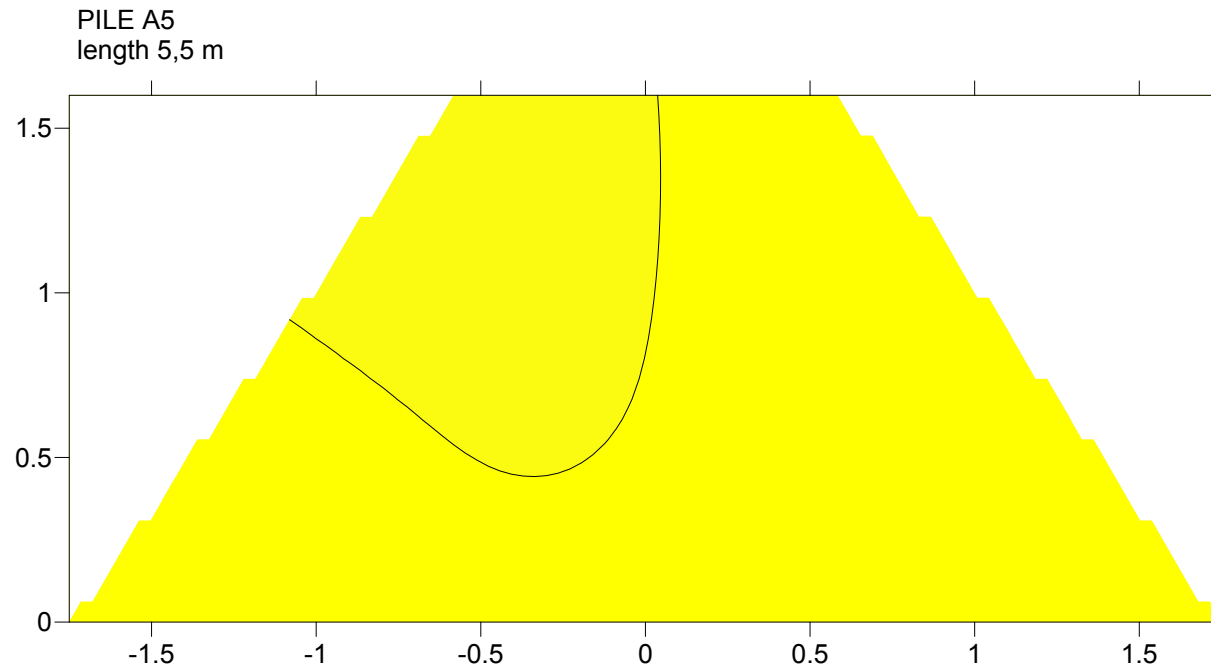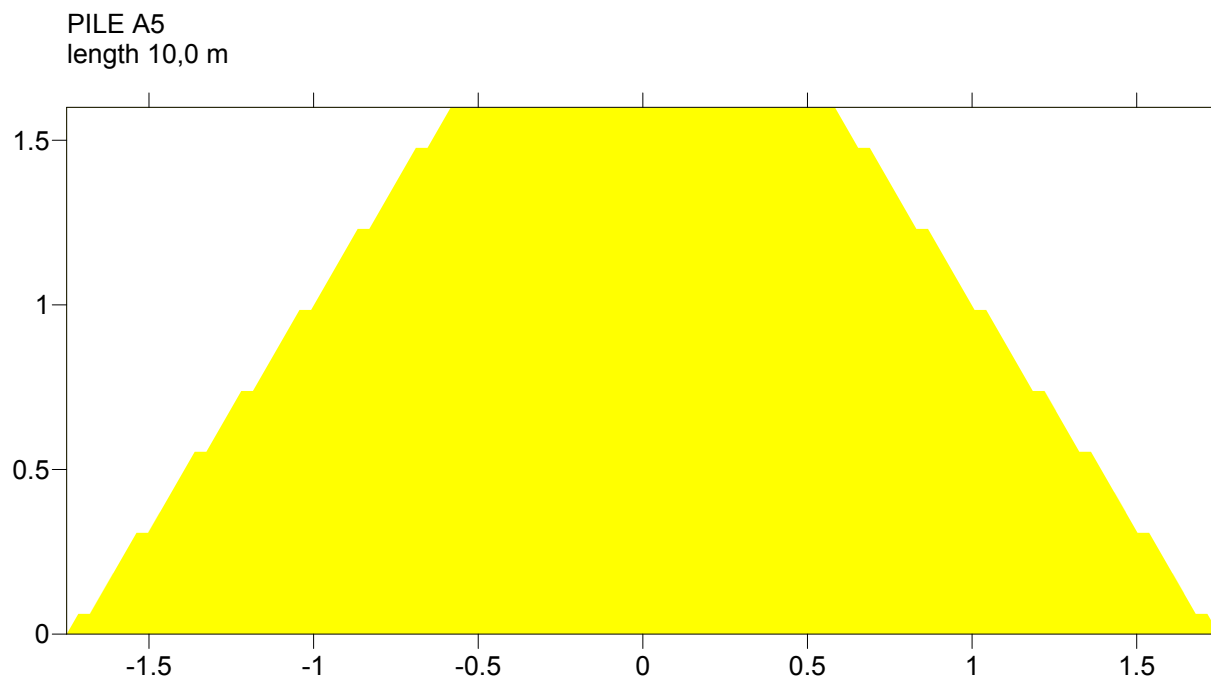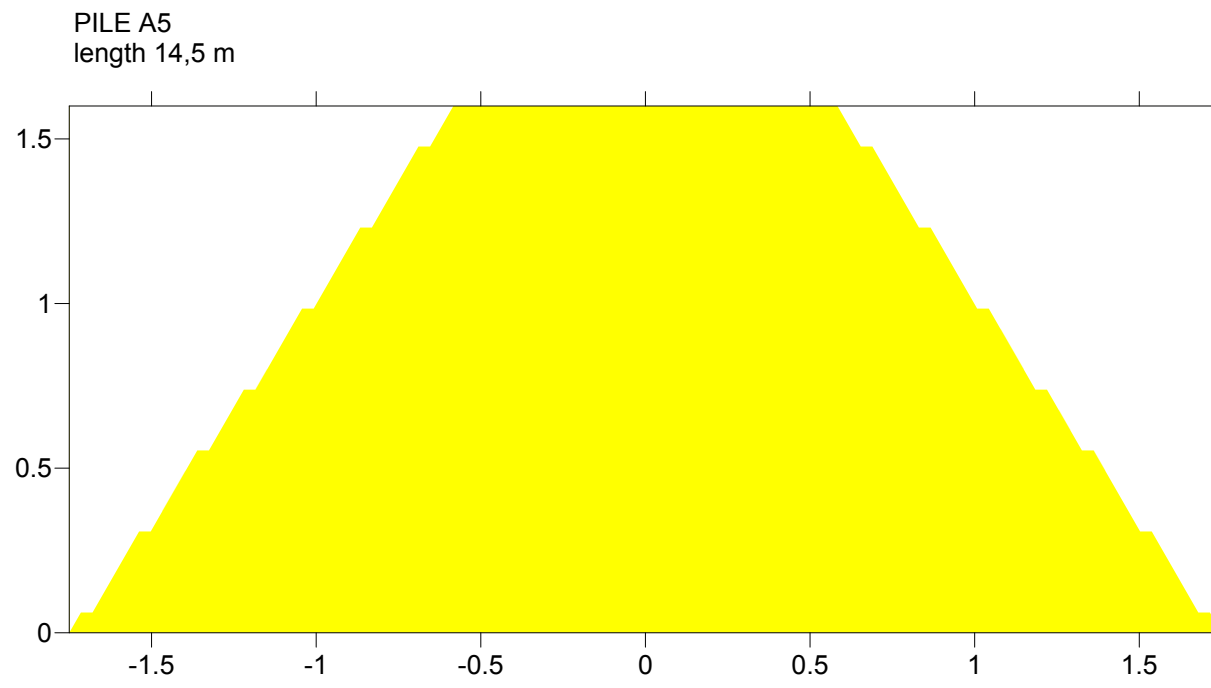

Supplement: s1 [file s1]

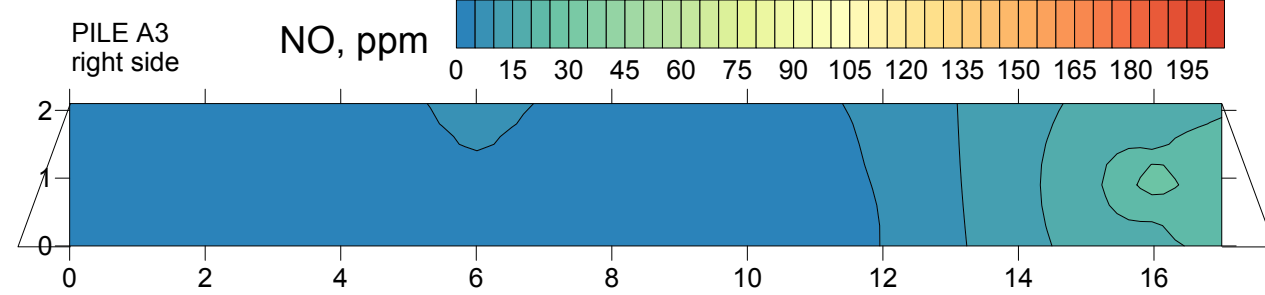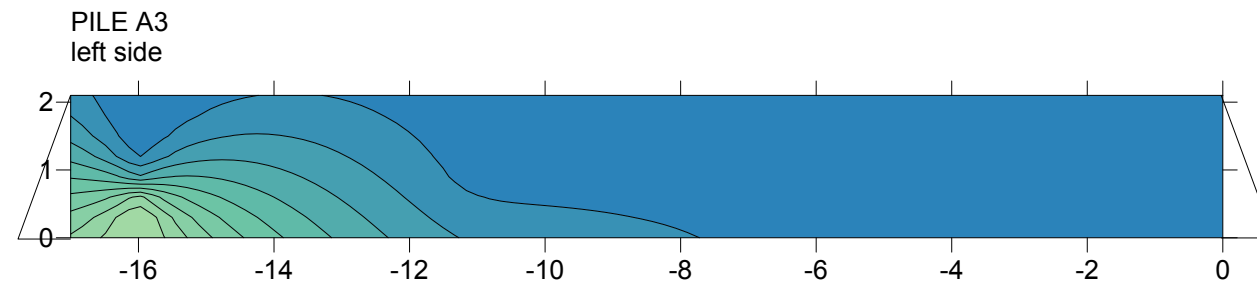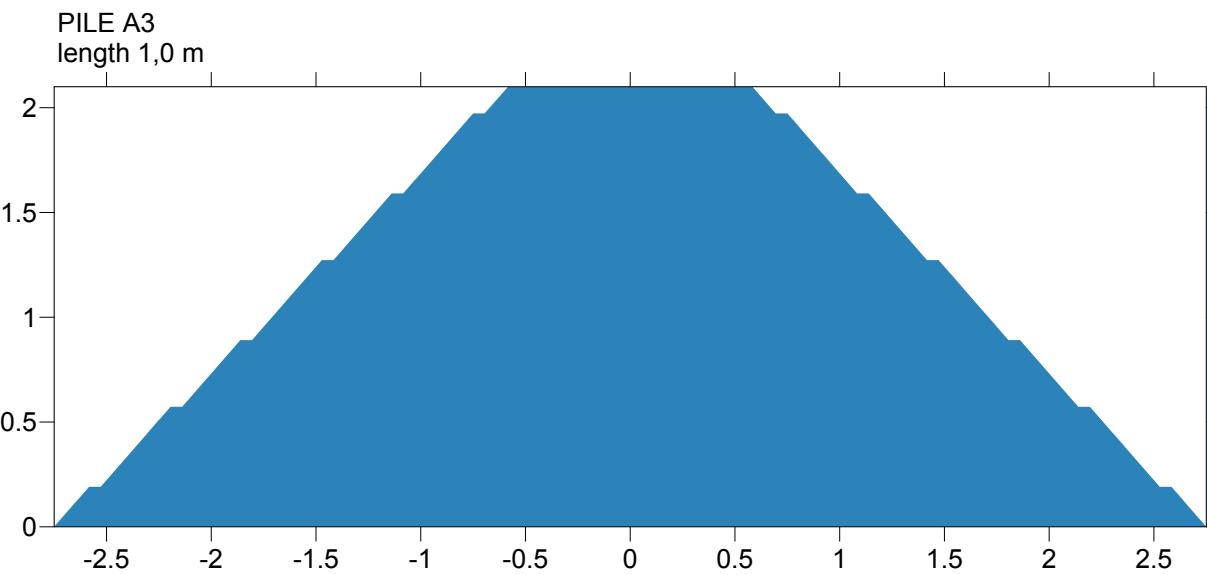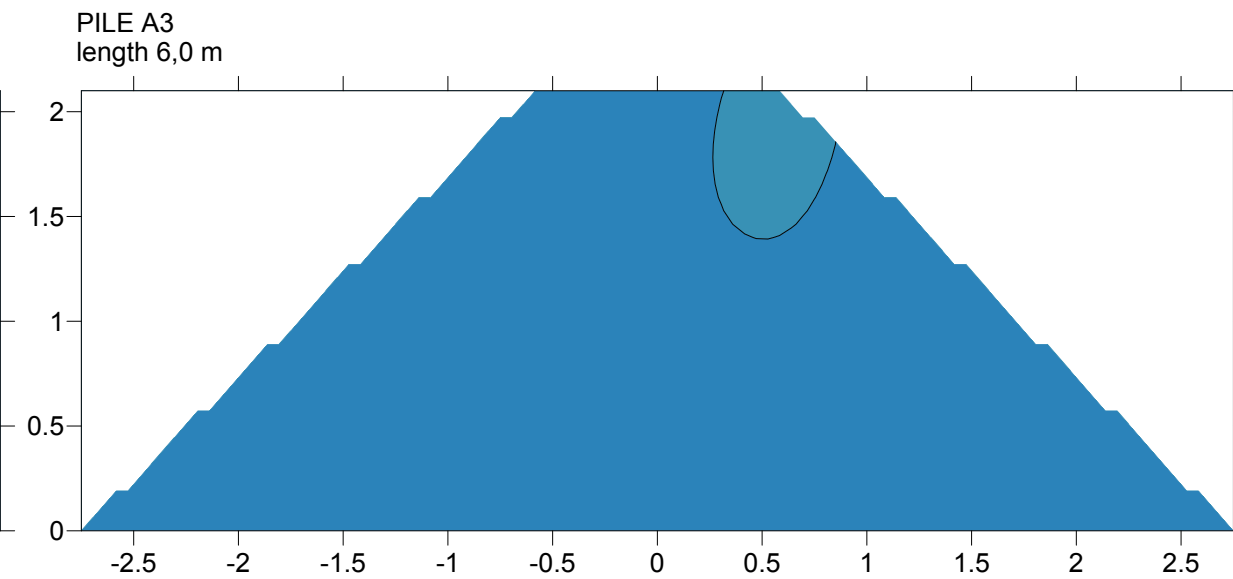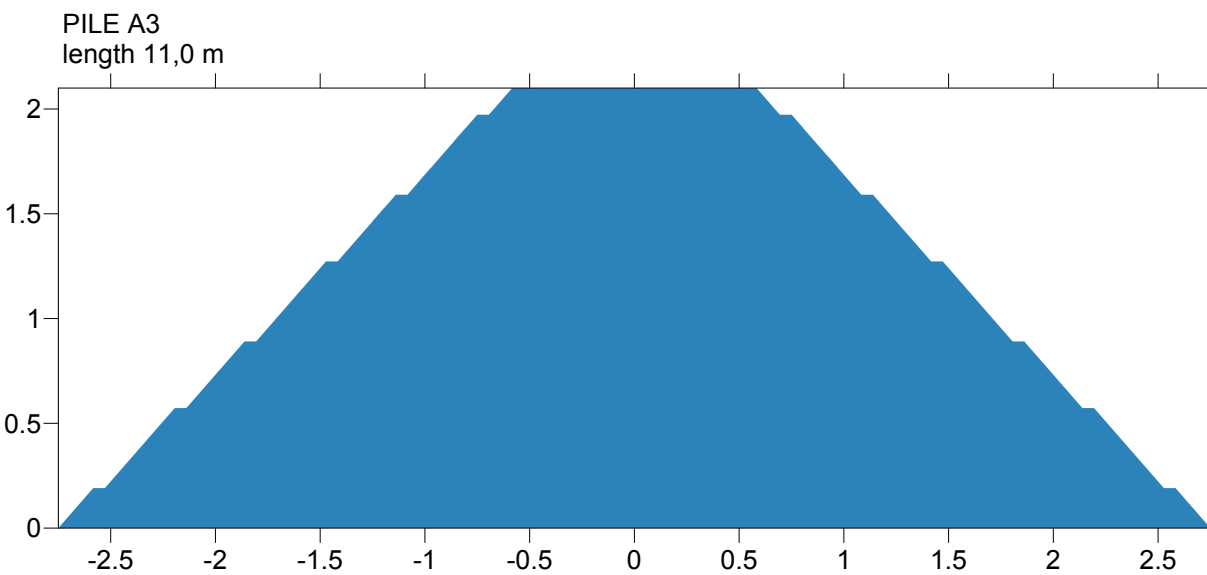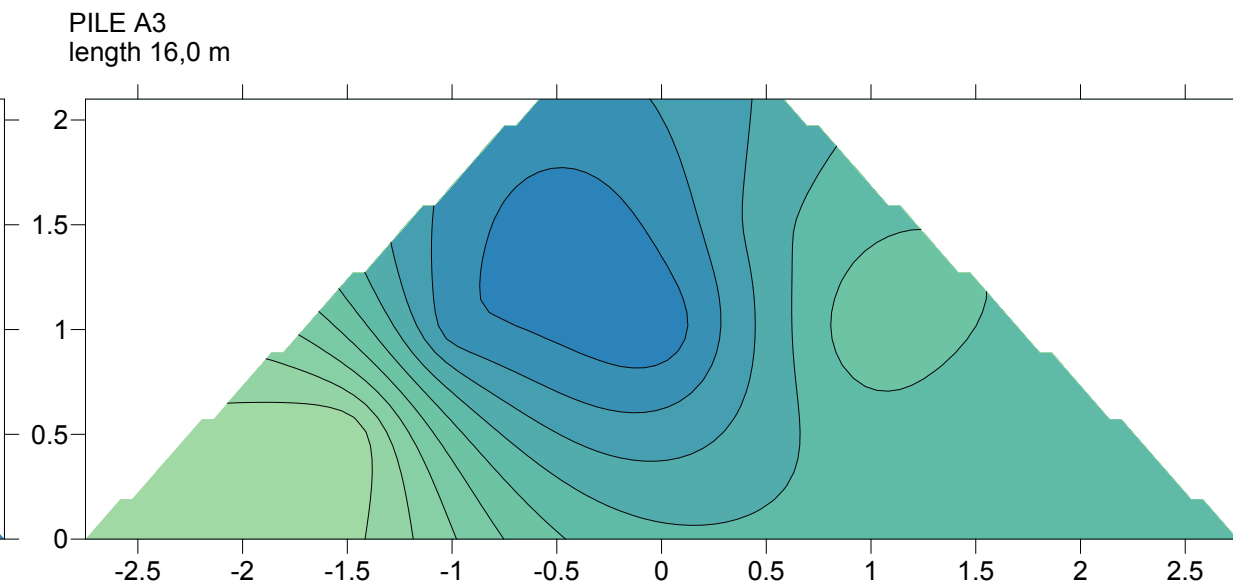

Supplement: s1 [file s1]

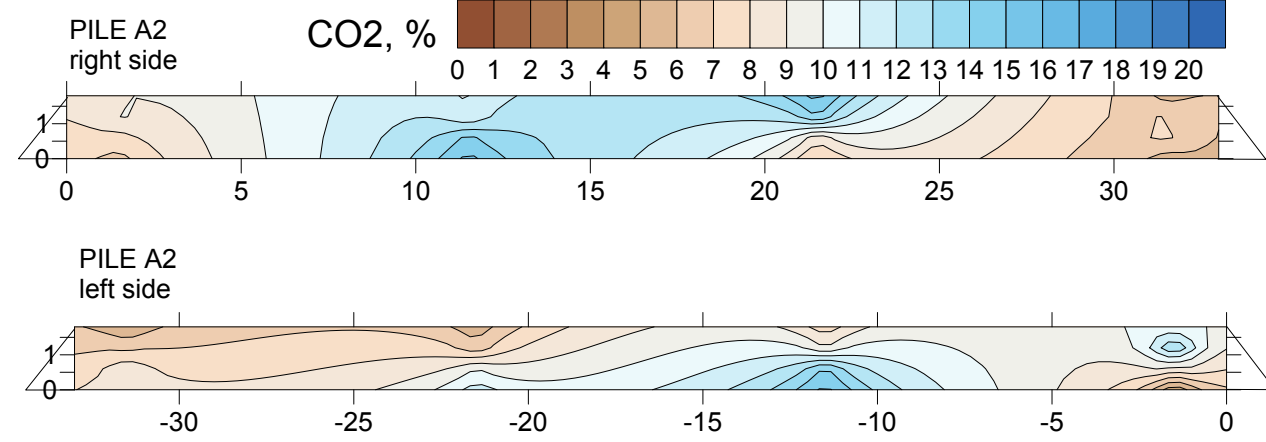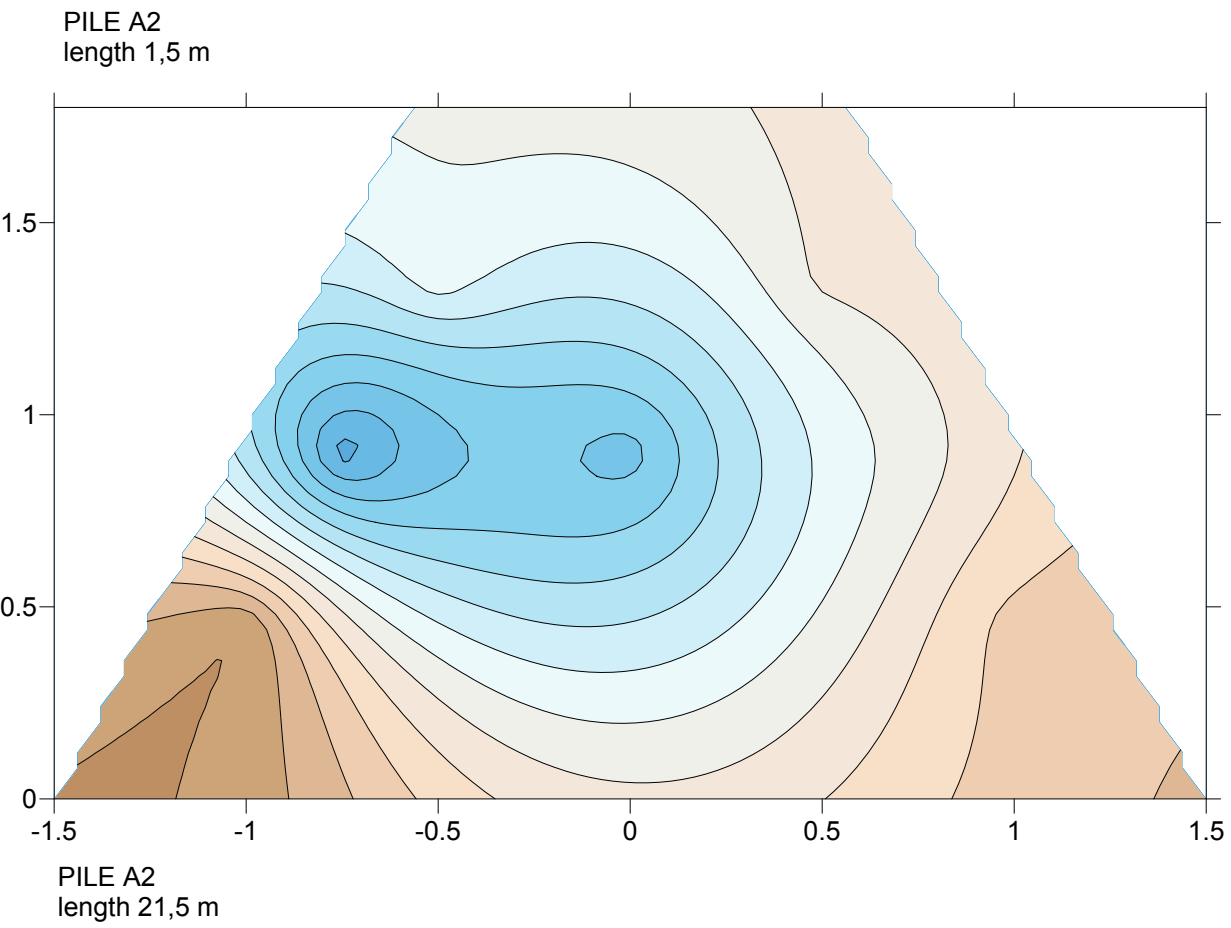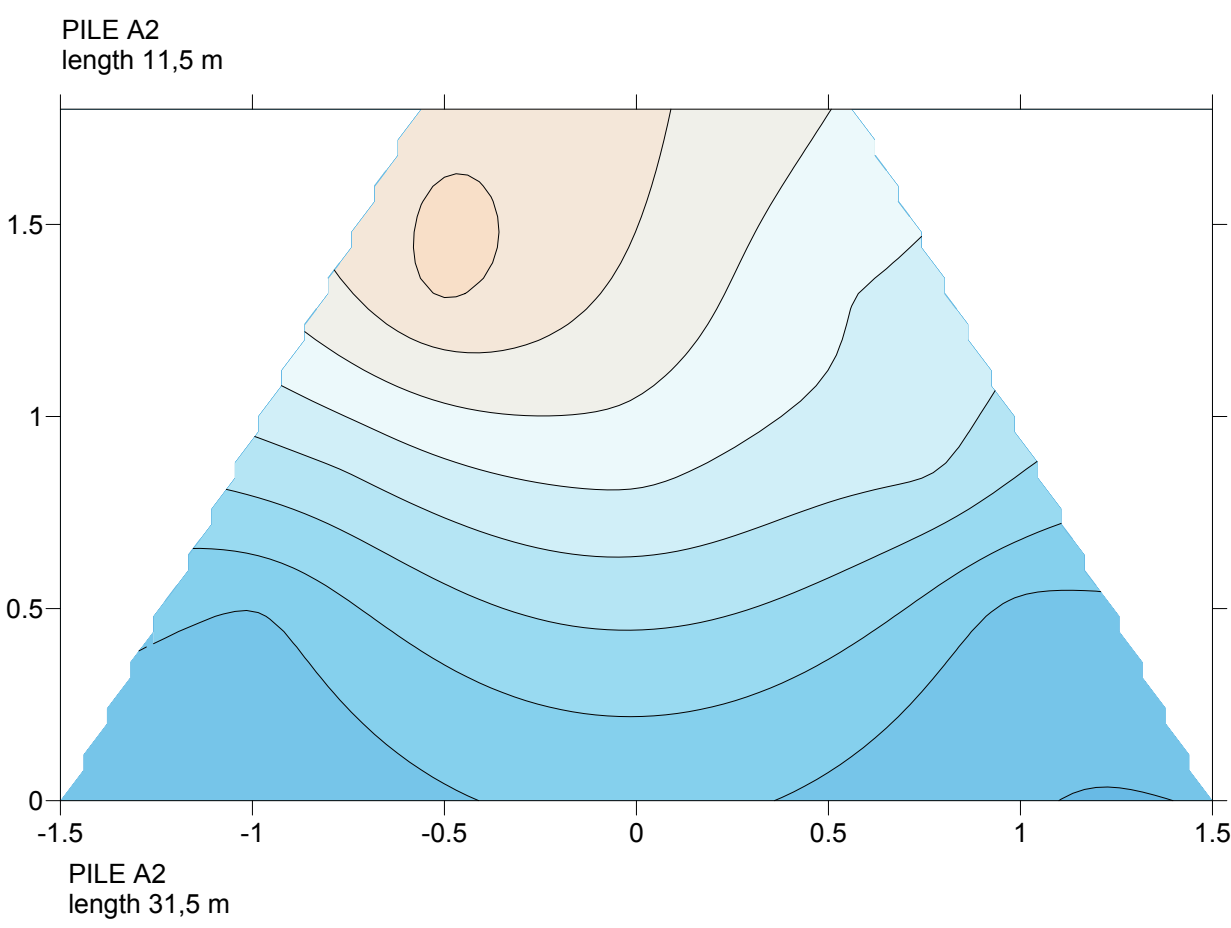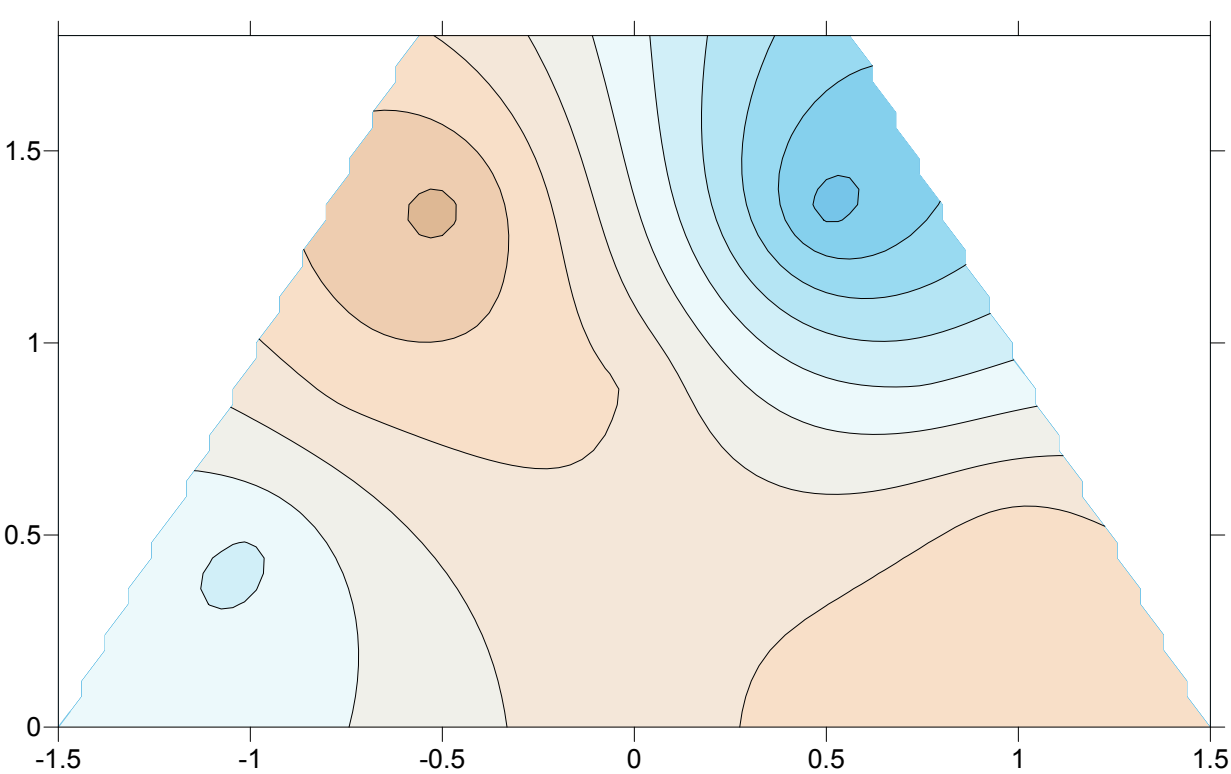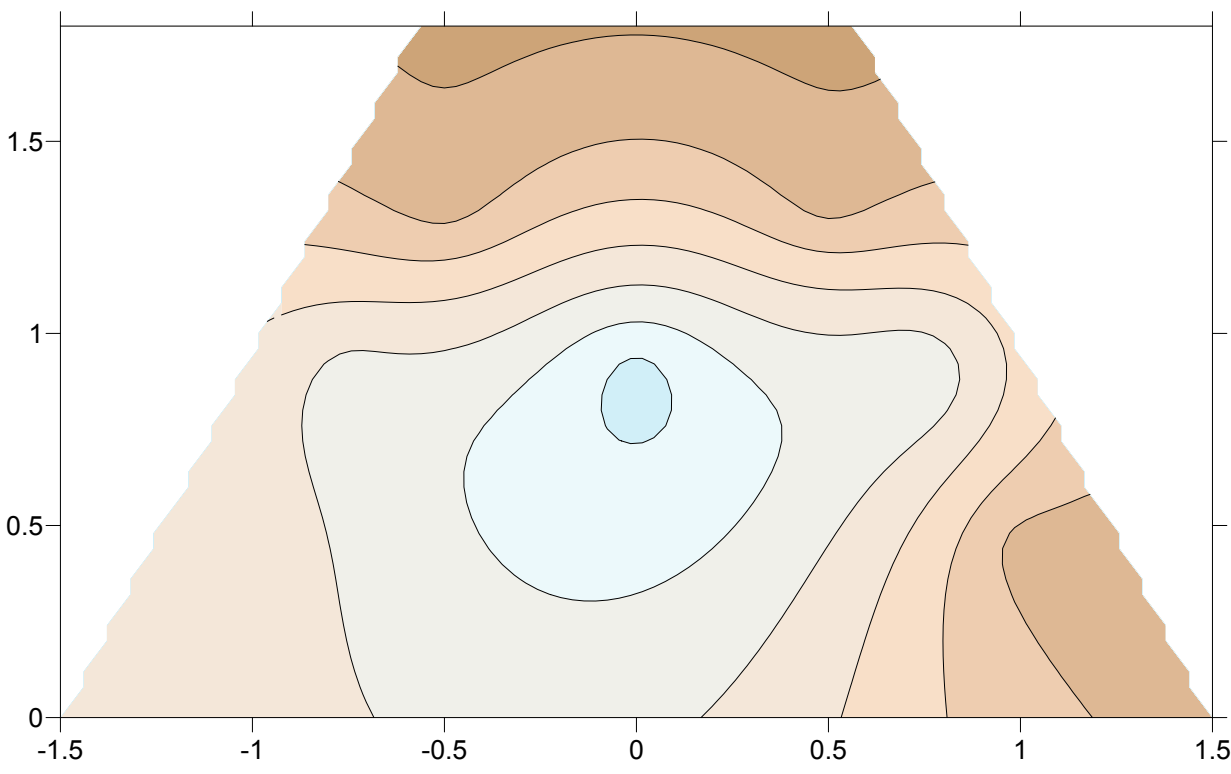

Supplement: s1 [file s1]
